# Supplementary material for: Single cell RNA-seq identifies the origins of heterogeneity in efficient cell transdifferentiation and reprogramming
Source: eLife. 2019 Mar 12;8:e41627. doi: 10.7554/eLife.41627 (PMC6435319; doi:10.7554/eLife.41627)
Supplement: Supplementary file 3. — Includes odds ratios, p-values and FDR, number of genes associated with each category, number and names of genes included both in the cluster and in the category. [file elife-41627-supp3.xlsx]

## Sheet: component 1 negative
	odds.ratio	p.value	n.categoy	n.category.and.component	genes	description	FDR
GO:0006909	7.00079	1.96429e-07	57	14	Axl,Cd36,Coro1c,Mertk,Fcgr1,Aif1,Slc11a1,Myo7a,Ccl2,Sirpa,Lrp1,Fcer1g,Fcgr3,Clec7a	phagocytosis	9.82357e-05
GO:0030595	7.53352	2.641e-07	50	13	Itgb2,Ccl3,Aif1,Adam8,Spp1,Pf4,Itgam,Ccl12,Ccl2,C3ar1,C5ar1,Fcer1g,Fcgr3	leukocyte chemotaxis	9.82357e-05
GO:0060326	6.68777	3.1219e-07	59	14	Itgb2,Ccl3,Aif1,Adam8,Spp1,Pf4,Itgam,Ccl12,Ccl2,Dock4,C3ar1,C5ar1,Fcer1g,Fcgr3	cell chemotaxis	9.82357e-05
GO:0006911	21.0281	1.11725e-06	14	7	Cd36,Fcgr1,Aif1,Sirpa,Fcer1g,Fcgr3,Clec7a	phagocytosis, engulfment	0.000230385
GO:0006897	3.75991	1.22026e-06	150	22	Axl,Cd36,Clcn5,Coro1c,Mertk,Fcgr1,Dab2,App,Aif1,Npc1,Slc11a1,Mrc1,Myo7a,Cd300a,Ccl2,Sirpa,Hip1,Lrp1,Cd14,Fcer1g,Fcgr3,Clec7a	endocytosis	0.000230385
GO:0010324	18.3986	2.01218e-06	15	7	Cd36,Fcgr1,Aif1,Sirpa,Fcer1g,Fcgr3,Clec7a	membrane invagination	0.000281354
GO:0045807	7.55591	2.08631e-06	42	11	Cd36,Fcgr1,Dab2,Slc11a1,Ccl2,Sirpa,Hip1,Cd14,Fcer1g,Fcgr3,Clec7a	positive regulation of endocytosis	0.000281354
GO:0001817	3.24687	4.12335e-06	186	24	Ccl3,Axl,Cd36,Cd83,Dhx58,Litaf,Ifnar1,Clec4n,Adam8,Irf7,Slc11a1,Clec5a,Il4ra,Ccl2,Tlr4,Il18,C3ar1,AF251705,Tlr1,Rab7b,Fcer1g,Fcgr3,Arrb2,Clec7a	regulation of cytokine production	0.000486555
GO:0051050	3.12735	7.22007e-06	192	24	Ccl3,Cd36,Prkaca,Fcgr1,Igf1,Dab2,Clec4n,Abcg1,Slc11a1,Tnfrsf11a,Serp1,Clec5a,Camk1,Il4ra,Ccl2,Sirpa,Hip1,Lrp1,AF251705,Cd14,Kcnn4,Fcer1g,Fcgr3,Clec7a	positive regulation of transport	0.000757305
GO:0001819	4.47431	8.75322e-06	87	15	Ccl3,Cd36,Cd83,Dhx58,Ifnar1,Adam8,Irf7,Slc11a1,Il4ra,Tlr4,Il18,C3ar1,Rab7b,Fcer1g,Clec7a	positive regulation of cytokine production	0.000823487
GO:0071621	8.27732	9.59571e-06	32	9	Itgb2,Ccl3,Spp1,Itgam,Ccl2,C3ar1,C5ar1,Fcer1g,Fcgr3	granulocyte chemotaxis	0.000823487
GO:0050766	9.37114	1.46563e-05	26	8	Cd36,Fcgr1,Slc11a1,Ccl2,Sirpa,Fcer1g,Fcgr3,Clec7a	positive regulation of phagocytosis	0.00115297
GO:0006954	3.1899	1.90385e-05	164	21	Ccl3,Axl,Apoe,Fcgr1,Pla2g7,Aif1,Lipa,Adam8,Slc11a1,Tnfrsf11a,Tnfrsf1b,Tnfrsf1a,Cd300a,Ccl12,Tlr4,Ptger3,Ptafr,Fcer1g,Fcgr3,Fabp4,Naip2	inflammatory response	0.00138249
GO:0030593	8.02995	3.565e-05	29	8	Itgb2,Ccl3,Spp1,Itgam,C3ar1,C5ar1,Fcer1g,Fcgr3	neutrophil chemotaxis	0.00224357
GO:0048002	8.02995	3.565e-05	29	8	Fcgr1,March8,Slc11a1,H2-DMb2,H2-DMa,Fcer1g,Fcgr3,H2-DMb1	antigen processing and presentation of peptide antigen	0.00224357
GO:0002675	20.8718	4.32901e-05	10	5	Fcgr1,Adam8,Tnfrsf11a,Fcer1g,Fcgr3	positive regulation of acute inflammatory response	0.00240388
GO:0006910	20.8718	4.32901e-05	10	5	Cd36,Fcgr1,Sirpa,Fcgr3,Clec7a	phagocytosis, recognition	0.00240388
GO:0050900	4.26647	5.09786e-05	78	13	Itgb2,Ccl3,Aif1,Adam8,Spp1,Pf4,Itgam,Ccl12,Ccl2,C3ar1,C5ar1,Fcer1g,Fcgr3	leukocyte migration	0.00267354
GO:0032680	6.33759	5.44354e-05	39	9	Ccl3,Axl,Cd36,Tlr4,Tlr1,Fcer1g,Fcgr3,Arrb2,Clec7a	regulation of tumor necrosis factor production	0.00270458
GO:0050729	7.3288	6.04195e-05	31	8	Ccl3,Fcgr1,Adam8,Tnfrsf11a,Tnfrsf1a,Fcer1g,Fcgr3,Fabp4	positive regulation of inflammatory response	0.0028518
GO:0009617	3.05981	7.35063e-05	153	19	Ccl3,Cd36,Fcgr1,Litaf,Slc11a1,Tnfrsf11a,Tnfrsf1a,Rps6ka3,Trib1,Ccl2,Tlr4,Ptger3,C5ar1,Cd14,Ptafr,Fcer1g,Lyz1,Lyz2,Naip2	response to bacterium	0.00330428
GO:0051272	3.73751	9.46145e-05	94	14	Ccl3,Dab2,Aif1,Csf1r,Adam8,Pdpn,Ctsh,Tgfbr2,Trf,Ccl2,C3ar1,Adam17,Bcl2,Zfp703	positive regulation of cellular component movement	0.00365841
GO:0050764	6.74076	9.80636e-05	33	8	Cd36,Fcgr1,Slc11a1,Ccl2,Sirpa,Fcer1g,Fcgr3,Clec7a	regulation of phagocytosis	0.00365841
GO:0015918	8.1693	0.000100621	25	7	Cd36,Apoe,Npc2,Abcg1,Npc1,Msr1,Lrp1	sterol transport	0.00365841
GO:0030301	8.1693	0.000100621	25	7	Cd36,Apoe,Npc2,Abcg1,Npc1,Msr1,Lrp1	cholesterol transport	0.00365841
GO:0002218	5.75902	0.000101324	42	9	Dhx58,Adam8,Irf7,Rps6ka3,Tlr13,Tlr4,Rab7b,Arrb2,Clec7a	activation of innate immune response	0.00365841
GO:0033993	2.96889	0.000104637	157	19	Ccl3,Cd36,Ctsl,Litaf,Npc1,Slc11a1,Tnfrsf11a,Rps6ka3,Adam9,Ctsh,Tgfbr2,Trib1,Ccl2,Tlr4,Ptger3,Pid1,Ptafr,Bcl2,Naip2	response to lipid	0.00365841
GO:0050878	3.60072	0.000133956	97	14	Axl,Cd36,Mertk,Plek,F5,Pf4,Ptpro,Tlr4,F13a1,Ptger3,Kcnn4,Usf2,Fcer1g,Ccnd1	regulation of body fluid levels	0.00451625
GO:0002764	3.55729	0.000149895	98	14	Dusp3,Fcgr1,Dhx58,Adam8,Irf7,Rps6ka3,Ctsh,Tlr13,Tlr4,Rab7b,Fcer1g,Fcgr3,Arrb2,Clec7a	immune response-regulating signaling pathway	0.00468126
GO:0006869	4.80891	0.000153728	54	10	Cd36,Apoe,Npc2,Abcg1,Npc1,Msr1,Tnfrsf11a,Plin2,Lrp1,Kcnn4	lipid transport	0.00468126
GO:0070371	4.80891	0.000153728	54	10	Ccl3,Dusp3,Dusp6,Igf1,Csf1r,Ctsh,Trf,Tlr4,Gpr183,Scimp	ERK1 and ERK2 cascade	0.00468126
GO:0030100	4.24035	0.000193823	66	11	Cd36,Fcgr1,Dab2,Slc11a1,Ccl2,Sirpa,Hip1,Cd14,Fcer1g,Fcgr3,Clec7a	regulation of endocytosis	0.00571777
GO:0042742	4.59798	0.0002107	56	10	Cd36,Fcgr1,Slc11a1,Tnfrsf1a,Tlr4,C5ar1,Fcer1g,Lyz1,Lyz2,Naip2	defense response to bacterium	0.0060273
GO:0006935	2.70664	0.000300583	170	19	Itgb2,Ccl3,App,Aif1,Adam8,Nrp1,Spp1,Pf4,Ptpro,Itgam,Ccl12,Ccl2,Dock4,C3ar1,Fpr1,C5ar1,Fcer1g,Fcgr3,Fpr3	chemotaxis	0.00834561
GO:0019882	5.43014	0.000340949	39	8	Fcgr1,March8,Slc11a1,H2-DMb2,H2-DMa,Fcer1g,Fcgr3,H2-DMb1	antigen processing and presentation	0.00919589
GO:0051251	3.2077	0.000383924	107	14	Cd83,Aif1,Adam8,Il4ra,Il2rg,Tgfbr2,Ccl2,H2-DMa,Tlr4,Il18,Gpr183,Lgals8,Lgals1,Tnfsf13	positive regulation of lymphocyte activation	0.0100673
GO:0032760	10.4332	0.000425622	15	5	Ccl3,Cd36,Tlr4,Fcer1g,Clec7a	positive regulation of tumor necrosis factor production	0.0105733
GO:0043277	10.4332	0.000425622	15	5	Axl,Cd36,Mertk,Ccl2,Lrp1	apoptotic cell clearance	0.0105733
GO:0007596	4.41218	0.000556193	52	9	Axl,Cd36,Mertk,Plek,F5,Pf4,Tlr4,F13a1,Fcer1g	blood coagulation	0.0134627
GO:0033344	9.48405	0.000595801	16	5	Apoe,Npc2,Abcg1,Npc1,Lrp1	cholesterol efflux	0.0140609
GO:0050778	2.69481	0.000618983	152	17	Dusp3,Fcgr1,Dhx58,Adam8,Irf7,Slc11a1,Rps6ka3,Tlr13,C1qa,H2-DMa,Tlr4,Rab7b,Fcer1g,Fcgr3,Arrb2,Clec7a,Tnfsf13	positive regulation of immune response	0.0142517
GO:0007599	4.31116	0.000643264	53	9	Axl,Cd36,Mertk,Plek,F5,Pf4,Tlr4,F13a1,Fcer1g	hemostasis	0.0144581
GO:0045087	3.00995	0.000674257	113	14	Dhx58,Clec4n,Aif1,Adam8,Irf7,Slc11a1,Clec5a,Rps6ka3,Tlr13,Ccl2,Tlr4,Rab7b,Arrb2,Clec7a	innate immune response	0.0148023
GO:0051270	2.47185	0.000691769	194	20	Ccl3,Rhoa,Dab2,Aif1,Csf1r,Adam8,Nrp1,Pdpn,Ctsh,Tgfbr2,Trf,Ccl2,Plxnb2,Rap2b,Lrp1,C3ar1,Rap2a,Adam17,Bcl2,Zfp703	regulation of cellular component movement	0.0148416
GO:0050870	3.5266	0.000766223	77	11	Cd83,Aif1,Adam8,Il4ra,Il2rg,Tgfbr2,Ccl2,H2-DMa,Il18,Lgals8,Lgals1	positive regulation of T cell activation	0.0160736
GO:0019884	6.60532	0.000795397	25	6	Fcgr1,H2-DMb2,H2-DMa,Fcer1g,Fcgr3,H2-DMb1	antigen processing and presentation of exogenous antigen	0.0163159
GO:0002495	8.69324	0.00081234	17	5	March8,H2-DMb2,H2-DMa,Fcer1g,H2-DMb1	antigen processing and presentation of peptide antigen via MHC class II	0.0163159
GO:2000147	3.26109	0.000840535	90	12	Ccl3,Dab2,Aif1,Csf1r,Adam8,Ctsh,Tgfbr2,Trf,Ccl2,C3ar1,Bcl2,Zfp703	positive regulation of cell motility	0.0165305
GO:0002460	3.03299	0.000959562	104	13	Fcgr1,Irf7,Slc11a1,Il4ra,Ctsh,C1qa,H2-DMa,Il18,Adam17,Fcer1g,Pirb,Fcgr3,Tnfsf13	adaptive immune response based on somatic recombination of immune receptors built from immunoglobulin superfamily domains	0.0184863
GO:0002237	2.99947	0.00105067	105	13	Ccl3,Cd36,Litaf,Slc11a1,Tnfrsf11a,Rps6ka3,Trib1,Ccl2,Tlr4,Ptger3,C5ar1,Cd14,Ptafr	response to molecule of bacterial origin	0.0198367
GO:0045089	3.94932	0.00111004	57	9	Dhx58,Adam8,Irf7,Rps6ka3,Tlr13,Tlr4,Rab7b,Arrb2,Clec7a	positive regulation of innate immune response	0.0205466
GO:0002526	5.97547	0.0012294	27	6	Fcgr1,Adam8,Tnfrsf11a,Ptger3,Fcer1g,Fcgr3	acute inflammatory response	0.0220717
GO:0040017	3.09974	0.00124229	94	12	Ccl3,Dab2,Aif1,Csf1r,Adam8,Ctsh,Tgfbr2,Trf,Ccl2,C3ar1,Bcl2,Zfp703	positive regulation of locomotion	0.0220717
GO:0070372	4.31041	0.00126258	47	8	Ccl3,Dusp3,Dusp6,Igf1,Csf1r,Tlr4,Gpr183,Scimp	regulation of ERK1 and ERK2 cascade	0.0220717
GO:0008037	4.73268	0.00157354	38	7	Cd36,Fcgr1,App,Nrp1,Sirpa,Fcgr3,Clec7a	cell recognition	0.0265254
GO:0008203	4.73268	0.00157354	38	7	Apoe,App,Abcg1,Soat1,Cebpa,Lrp1,Ch25h	cholesterol metabolic process	0.0265254
GO:0019724	4.0988	0.00167093	49	8	Fcgr1,Irf7,C1qa,H2-DMa,Fcer1g,Pirb,Fcgr3,Tnfsf13	B cell mediated immunity	0.0268014
GO:0006693	10.3966	0.00167509	12	4	Pdpn,Fam213b,Hpgds,Tnfrsf1a	prostaglandin metabolic process	0.0268014
GO:0045123	10.3966	0.00167509	12	4	Itgb2,Adam8,Itgam,Ccl2	cellular extravasation	0.0268014
GO:0071356	6.9518	0.00181489	20	5	Tnfrsf11a,Tnfrsf1b,Tnfrsf1a,Ccl2,Pid1	cellular response to tumor necrosis factor	0.028237
GO:0030168	5.45426	0.00182464	29	6	Axl,Mertk,Plek,Pf4,Tlr4,Fcer1g	platelet activation	0.028237
GO:0030335	3.09831	0.00193813	86	11	Ccl3,Dab2,Aif1,Csf1r,Adam8,Ctsh,Tgfbr2,Ccl2,C3ar1,Bcl2,Zfp703	positive regulation of cell migration	0.0295096
GO:0002250	2.75543	0.00207426	113	13	Fcgr1,Irf7,Slc11a1,Il4ra,Ctsh,C1qa,H2-DMa,Il18,Adam17,Fcer1g,Pirb,Fcgr3,Tnfsf13	adaptive immune response	0.0310809
GO:0016125	4.44471	0.00214732	40	7	Apoe,App,Abcg1,Soat1,Cebpa,Lrp1,Ch25h	sterol metabolic process	0.031673
GO:0048771	3.50654	0.00228991	63	9	Acvrl1,Axl,Igf1,Csf1r,Lipa,Adam8,Tpp1,Trf,Mitf	tissue remodeling	0.0328573
GO:0070373	9.241	0.00233203	13	4	Dusp3,Dusp6,Igf1,Tlr4	negative regulation of ERK1 and ERK2 cascade	0.0328573
GO:0072676	9.241	0.00233203	13	4	Ccl3,Aif1,Adam8,Ccl2	lymphocyte migration	0.0328573
GO:0002687	6.13156	0.00285648	22	5	Ccl3,Aif1,Adam8,Ccl2,C3ar1	positive regulation of leukocyte migration	0.0396546
GO:0002253	2.75773	0.00297749	104	12	Dusp3,Dhx58,Adam8,Irf7,Rps6ka3,Tlr13,C1qa,Tlr4,Rab7b,Fcer1g,Arrb2,Clec7a	activation of immune response	0.0399256
GO:0032496	2.902	0.00305431	91	11	Ccl3,Cd36,Litaf,Slc11a1,Tnfrsf11a,Rps6ka3,Trib1,Ccl2,Tlr4,Ptger3,Ptafr	response to lipopolysaccharide	0.0399256
GO:0050727	2.902	0.00305431	91	11	Ccl3,Apoe,Fcgr1,Adam8,Tnfrsf11a,Tnfrsf1b,Tnfrsf1a,Tlr4,Fcer1g,Fcgr3,Fabp4	regulation of inflammatory response	0.0399256
GO:0050714	4.82255	0.00309682	32	6	Ccl3,Clec4n,Clec5a,Il4ra,AF251705,Kcnn4	positive regulation of protein secretion	0.0399256
GO:0002690	8.3168	0.0031469	14	4	Ccl3,Aif1,Ccl2,C3ar1	positive regulation of leukocyte chemotaxis	0.0399256
GO:0019886	8.3168	0.0031469	14	4	H2-DMb2,H2-DMa,Fcer1g,H2-DMb1	antigen processing and presentation of exogenous peptide antigen via MHC class II	0.0399256
GO:0002699	3.32019	0.00317205	66	9	Cd36,Fcgr1,Il4ra,Cd300a,Ccl2,Tlr4,Fcer1g,Fcgr3,Tnfsf13	positive regulation of immune effector process	0.0399256
GO:0051897	5.79022	0.00351374	23	5	Axl,Igf1,Itsn1,Adam8,Arrb2	positive regulation of protein kinase B signaling cascade	0.0436443
GO:0030334	2.29853	0.00407915	164	16	Ccl3,Rhoa,Dab2,Aif1,Csf1r,Adam8,Ctsh,Tgfbr2,Ccl2,Plxnb2,Rap2b,Lrp1,C3ar1,Rap2a,Bcl2,Zfp703	regulation of cell migration	0.048779
GO:0040012	2.21975	0.00414705	191	18	Ccl3,Rhoa,Dab2,Aif1,Csf1r,Adam8,Nrp1,Ctsh,Tgfbr2,Trf,Ccl2,Plxnb2,Rap2b,Lrp1,C3ar1,Rap2a,Bcl2,Zfp703	regulation of locomotion	0.048779
GO:0007040	5.48469	0.00427297	24	5	Acp2,Atp6v0c,Hexa,Myo7a,Tpp1	lysosome organization	0.048779
GO:0015807	5.48469	0.00427297	24	5	Serinc1,Slc7a8,Slc11a1,Slc38a7,Slc43a2	L-amino acid transport	0.048779
GO:0015711	2.76178	0.00427825	95	11	Serinc1,Slc7a8,Slc52a2,Slc11a1,Tnfrsf11a,Plin2,Folr2,Slc38a7,Slc43a2,Ptger3,Kcnn4	organic anion transport	0.048779
GO:0042060	2.76178	0.00427825	95	11	Axl,Cd36,Mertk,Plek,Slc11a1,F5,Pf4,Tlr4,F13a1,Myof,Fcer1g	wound healing	0.048779
GO:0007033	3.8569	0.00428883	45	7	Acp2,Ctsd,Atp6v0c,Hexa,Myo7a,Tpp1,Mtm1	vacuole organization	0.048779
GO:0006820	2.55933	0.00509366	111	12	Serinc1,Slc7a8,Slc52a2,Slc11a1,Tnfrsf11a,Plin2,Folr2,Slc38a7,Slc43a2,Ptger3,P2ry6,Kcnn4	anion transport	0.0551532
GO:0034612	5.20986	0.00514236	25	5	Tnfrsf11a,Tnfrsf1b,Tnfrsf1a,Ccl2,Pid1	response to tumor necrosis factor	0.0551532
GO:0050715	5.20986	0.00514236	25	5	Ccl3,Clec4n,Clec5a,Il4ra,AF251705	positive regulation of cytokine secretion	0.0551532
GO:0002573	2.84398	0.00520612	84	10	Ccl3,Csf1r,Adam8,Fam20c,Itgam,Tgfbr2,Trf,Cebpa,Mitf,Pirb	myeloid leukocyte differentiation	0.0551532
GO:2000145	2.26301	0.00522176	177	17	Ccl3,Rhoa,Dab2,Aif1,Csf1r,Adam8,Ctsh,Tgfbr2,Trf,Ccl2,Plxnb2,Rap2b,Lrp1,C3ar1,Rap2a,Bcl2,Zfp703	regulation of cell motility	0.0551532
GO:0000188	6.92865	0.00531668	16	4	Dusp3,Dusp6,Spred1,Dusp7	inactivation of MAPK activity	0.0551532
GO:0033032	6.92865	0.00531668	16	4	Adam17,Bcl2,Fcer1g,Ccr5	regulation of myeloid cell apoptotic process	0.0551532
GO:0097006	6.92865	0.00531668	16	4	Cd36,Apoe,Abcg1,Msr1	regulation of plasma lipoprotein particle levels	0.0551532
GO:0016064	3.6623	0.00549292	47	7	Fcgr1,Irf7,C1qa,H2-DMa,Fcer1g,Fcgr3,Tnfsf13	immunoglobulin mediated immune response	0.0558842
GO:0051222	3.28918	0.00550554	59	8	Ccl3,Prkaca,Clec4n,Clec5a,Camk1,Il4ra,AF251705,Kcnn4	positive regulation of protein transport	0.0558842
GO:0045088	3.00072	0.00572565	72	9	Dhx58,Adam8,Irf7,Rps6ka3,Tlr13,Tlr4,Rab7b,Arrb2,Clec7a	regulation of innate immune response	0.0575002
GO:0048871	2.63449	0.00586464	99	11	Csf1r,Lipa,Adam8,Slc11a1,Tnfrsf11a,Tpp1,Ctsh,Trf,Tlr4,Ptger3,Bcl2	multicellular organismal homeostasis	0.058276
GO:0002366	2.76813	0.00615591	86	10	Ccl3,Slc11a1,Il4ra,Cd300a,Gpr183,Lgals8,Fcer1g,Lgals1,Clec7a,Tnfsf13	leukocyte activation involved in immune response	0.0601654
GO:0043491	3.57248	0.00618225	48	7	Ccl3,Axl,Mertk,Igf1,Itsn1,Adam8,Arrb2	protein kinase B signaling cascade	0.0601654
GO:0030316	4.04151	0.00654297	37	6	Ccl3,Csf1r,Adam8,Fam20c,Trf,Mitf	osteoclast differentiation	0.0625073
GO:0061024	2.15195	0.00655532	185	17	Cd36,Fcgr1,Ndel1,Dab2,Aif1,Tpst2,Folr2,Myo5a,Sirpa,Hip1,Sh3pxd2b,Myof,Kcnn4,Bcl2,Fcer1g,Fcgr3,Clec7a	membrane organization	0.0625073
GO:0033028	6.3938	0.00670263	17	4	Adam17,Bcl2,Fcer1g,Ccr5	myeloid cell apoptotic process	0.0632728
GO:0050863	2.47726	0.00727183	124	13	Dusp3,Cd83,Aif1,Adam8,Il4ra,Il2rg,Tgfbr2,Ccl2,H2-DMa,Il18,Socs6,Lgals8,Lgals1	regulation of T cell activation	0.0679664
GO:0032675	3.91468	0.00747474	38	6	Cd36,Tlr4,Tlr1,Rab7b,Fcer1g,Arrb2	regulation of interleukin-6 production	0.0685064
GO:0045582	3.91468	0.00747474	38	6	Cd83,Adam8,Il4ra,Il2rg,Tgfbr2,H2-DMa	positive regulation of T cell differentiation	0.0685064
GO:0019915	4.52798	0.00849138	28	5	Cd36,Abcg1,Msr1,Hexa,Plin2	lipid storage	0.0756862
GO:0070374	4.52798	0.00849138	28	5	Ccl3,Csf1r,Tlr4,Gpr183,Scimp	positive regulation of ERK1 and ERK2 cascade	0.0756862
GO:0006898	3.7947	0.00849866	39	6	Fcgr1,Dab2,Mrc1,Cd300a,Hip1,Lrp1	receptor-mediated endocytosis	0.0756862
GO:0051047	2.77756	0.00887473	77	9	Ccl3,Clec4n,Tnfrsf11a,Serp1,Clec5a,Il4ra,AF251705,Kcnn4,Fcer1g	positive regulation of secretion	0.0782967
GO:0002438	8.88029	0.00932172	10	3	Fcgr1,Fcer1g,Fcgr3	acute inflammatory response to antigenic stimulus	0.0792766
GO:0002474	8.88029	0.00932172	10	3	Fcgr1,Fcer1g,Fcgr3	antigen processing and presentation of peptide antigen via MHC class I	0.0792766
GO:0051084	8.88029	0.00932172	10	3	H2-DMb2,H2-DMa,H2-DMb1	'de novo' posttranslational protein folding	0.0792766
GO:2000401	8.88029	0.00932172	10	3	Ccl3,Aif1,Adam8	regulation of lymphocyte migration	0.0792766
GO:0042158	4.33862	0.00988028	29	5	Apoe,Atg10,Atg7,Pgap2,Apobec1	lipoprotein biosynthetic process	0.0832767
GO:0030193	5.5403	0.0101468	19	4	Cd36,Plek,Tlr4,Fcer1g	regulation of blood coagulation	0.0847664
GO:0002443	2.45817	0.0107349	115	12	Ccl3,Fcgr1,Irf7,Slc11a1,Ctsh,Cd300a,C1qa,H2-DMa,Fcer1g,Pirb,Fcgr3,Tnfsf13	leukocyte mediated immunity	0.0888927
GO:0071396	2.65885	0.0113098	80	9	Ccl3,Cd36,Litaf,Npc1,Ccl2,Tlr4,Pid1,Ptafr,Naip2	cellular response to lipid	0.0923372
GO:0060627	2.41045	0.0113465	117	12	Cd36,Fcgr1,Dab2,Slc11a1,Cd300a,Ccl2,Sirpa,Hip1,Cd14,Fcer1g,Fcgr3,Clec7a	regulation of vesicle-mediated transport	0.0923372
GO:0006631	2.47091	0.0122016	95	10	Elovl1,Mid1ip1,Hsd17b4,Pdpn,Fam213b,Hpgds,Tnfrsf1a,Elovl5,Myo5a,Acaa1a	fatty acid metabolic process	0.0966067
GO:0032729	5.19363	0.0122298	20	4	Ifnar1,Slc11a1,Tlr4,Il18	positive regulation of interferon-gamma production	0.0966067
GO:0045576	5.19363	0.0122298	20	4	Lcp2,Cd300a,Fcer1g,Fcgr3	mast cell activation	0.0966067
GO:0009595	7.77068	0.0123828	11	3	Tlr4,Naip2,Clec7a	detection of biotic stimulus	0.0966067
GO:0033209	7.77068	0.0123828	11	3	Tnfrsf11a,Tnfrsf1b,Tnfrsf1a	tumor necrosis factor-mediated signaling pathway	0.0966067
GO:0030099	2.08802	0.013322	167	15	Ccl3,Dnase2a,Dab2,Csf1r,Adam8,Fam20c,Pf4,Itgam,Tgfbr2,Trf,Lmo2,Cebpa,Mitf,Rab7b,Pirb	myeloid cell differentiation	0.103082
GO:0050663	3.38248	0.0136095	43	6	Ccl3,Lcp2,Clec4n,Clec5a,Il4ra,AF251705	cytokine secretion	0.10445
GO:0002367	4.88698	0.0145679	21	4	Cd36,Slc11a1,Tlr4,Fcer1g	cytokine production involved in immune response	0.109144
GO:0032755	4.88698	0.0145679	21	4	Cd36,Tlr4,Rab7b,Fcer1g	positive regulation of interleukin-6 production	0.109144
GO:0033619	4.88698	0.0145679	21	4	Adam8,Adam9,Ctsh,Adam17	membrane protein proteolysis	0.109144
GO:0046849	3.85498	0.0149646	32	5	Csf1r,Adam8,Tpp1,Trf,Mitf	bone remodeling	0.111233
GO:0001894	2.70026	0.0151335	70	8	Csf1r,Lipa,Adam8,Tpp1,Ctsh,Trf,Tlr4,Bcl2	tissue homeostasis	0.111609
GO:0014812	6.90568	0.0159521	12	3	Aif1,Lrp1,Bcl2	muscle cell migration	0.114953
GO:0043372	6.90568	0.0159521	12	3	Cd83,Il4ra,Il2rg	positive regulation of CD4-positive, alpha-beta T cell differentiation	0.114953
GO:0051384	6.90568	0.0159521	12	3	Ctsl,Adam9,Bcl2	response to glucocorticoid stimulus	0.114953
GO:0001818	3.2079	0.0168365	45	6	Axl,Cd83,Dhx58,Slc11a1,Tlr4,Arrb2	negative regulation of cytokine production	0.117047
GO:0045621	3.2079	0.0168365	45	6	Cd83,Adam8,Il4ra,Il2rg,Tgfbr2,H2-DMa	positive regulation of lymphocyte differentiation	0.117047
GO:0002224	3.71607	0.0169867	33	5	Irf7,Rps6ka3,Tlr13,Rab7b,Arrb2	toll-like receptor signaling pathway	0.117047
GO:0048545	3.71607	0.0169867	33	5	Ctsl,Npc1,Adam9,Bcl2,Naip2	response to steroid hormone stimulus	0.117047
GO:0050707	3.71607	0.0169867	33	5	Ccl3,Clec4n,Clec5a,Il4ra,AF251705	regulation of cytokine secretion	0.117047
GO:0050920	3.71607	0.0169867	33	5	Ccl3,Aif1,Nrp1,Ccl2,C3ar1	regulation of chemotaxis	0.117047
GO:0007041	6.21369	0.0200381	13	3	Snx27,Mtm1,Hgsnat	lysosomal transport	0.130503
GO:0010543	6.21369	0.0200381	13	3	Plek,Tlr4,Fcer1g	regulation of platelet activation	0.130503
GO:0032370	6.21369	0.0200381	13	3	Abcg1,Tnfrsf11a,Lrp1	positive regulation of lipid transport	0.130503
GO:0033059	6.21369	0.0200381	13	3	Myo7a,Myo5a,Bcl2	cellular pigmentation	0.130503
GO:0045124	6.21369	0.0200381	13	3	Csf1r,Adam8,Trf	regulation of bone resorption	0.130503
GO:0007229	4.3713	0.0200455	23	4	Itgb2,Rhoa,Dab2,Fcer1g	integrin-mediated signaling pathway	0.130503
GO:0046638	4.3713	0.0200455	23	4	Cd83,Il4ra,Il2rg,Tgfbr2	positive regulation of alpha-beta T cell differentiation	0.130503
GO:0050921	4.3713	0.0200455	23	4	Ccl3,Aif1,Ccl2,C3ar1	positive regulation of chemotaxis	0.130503
GO:0008202	2.5347	0.0206239	74	8	Apoe,Sgpl1,App,Abcg1,Soat1,Cebpa,Lrp1,Ch25h	steroid metabolic process	0.132442
GO:0009306	2.5347	0.0206239	74	8	Ccl3,Lcp2,Plek,Clec4n,Clec5a,Il4ra,AF251705,Kcnn4	protein secretion	0.132442
GO:0042157	3.46738	0.0215566	35	5	Apoe,Atg10,Atg7,Pgap2,Apobec1	lipoprotein metabolic process	0.137496
GO:0006865	2.97719	0.0226088	48	6	Serinc1,Slc7a8,Slc11a1,Folr2,Slc38a7,Slc43a2	amino acid transport	0.143239
GO:0045453	4.15215	0.0232	24	4	Csf1r,Adam8,Tpp1,Trf	bone resorption	0.145039
GO:0061041	4.15215	0.0232	24	4	Cd36,Plek,Tlr4,Fcer1g	regulation of wound healing	0.145039
GO:0002821	3.35494	0.0241144	36	5	Fcgr1,Slc11a1,Fcer1g,Fcgr3,Tnfsf13	positive regulation of adaptive immune response	0.149763
GO:0032613	5.64771	0.0246448	14	3	Cd83,Tlr4,Fcer1g	interleukin-10 production	0.152057
GO:0034097	2.04322	0.0255247	147	13	Aif1,Csf1r,Irf7,Slc11a1,Tnfrsf11a,Jak1,Tnfrsf1b,Pf4,Tnfrsf1a,Ccl2,Pid1,Bcl2,Pirb	response to cytokine stimulus	0.156463
GO:0006633	3.24954	0.0268599	37	5	Elovl1,Mid1ip1,Fam213b,Elovl5,Myo5a	fatty acid biosynthetic process	0.163066
GO:0050708	2.84085	0.0271201	50	6	Ccl3,Clec4n,Clec5a,Il4ra,AF251705,Kcnn4	regulation of protein secretion	0.163066
GO:0071222	2.84085	0.0271201	50	6	Ccl3,Cd36,Litaf,Ccl2,Tlr4,Ptafr	cellular response to lipopolysaccharide	0.163066
GO:0071345	2.07942	0.0284592	122	11	Aif1,Csf1r,Irf7,Tnfrsf11a,Jak1,Tnfrsf1b,Pf4,Tnfrsf1a,Ccl2,Pid1,Pirb	cellular response to cytokine stimulus	0.170035
GO:0007257	5.17752	0.0297719	15	3	Dab2,Fgd4,Trf	activation of JUN kinase activity	0.175802
GO:0051896	3.15053	0.029797	38	5	Axl,Igf1,Itsn1,Adam8,Arrb2	regulation of protein kinase B signaling cascade	0.175802
GO:0002819	2.51765	0.0300609	65	7	Fcgr1,Irf7,Slc11a1,Il4ra,Fcer1g,Fcgr3,Tnfsf13	regulation of adaptive immune response	0.176258
GO:0048520	3.77301	0.0303686	26	4	Ccl3,Aif1,Ccl2,C3ar1	positive regulation of behavior	0.176963
GO:0071241	3.60872	0.0343903	27	4	Hmox1,Fos,Cebpa,Fabp4	cellular response to inorganic substance	0.199168
GO:0002532	4.7787	0.0354154	16	3	Cd300a,Tlr4,Fcer1g	production of molecular mediator involved in inflammatory response	0.200193
GO:0007034	4.7787	0.0354154	16	3	Snx27,Mtm1,Hgsnat	vacuolar transport	0.200193
GO:0010883	4.7787	0.0354154	16	3	Cd36,Abcg1,Msr1	regulation of lipid storage	0.200193
GO:0046850	4.7787	0.0354154	16	3	Csf1r,Adam8,Trf	regulation of bone remodeling	0.200193
GO:0051223	2.0526	0.0390817	112	10	Ccl3,Cd36,Prkaca,Litaf,Clec4n,Clec5a,Camk1,Il4ra,AF251705,Kcnn4	regulation of protein transport	0.219602
GO:0042089	2.54861	0.040892	55	6	Ifnar1,Irf7,Tlr4,Il18,Tlr1,Fcgr3	cytokine biosynthetic process	0.222957
GO:0042107	2.54861	0.040892	55	6	Ifnar1,Irf7,Tlr4,Il18,Tlr1,Fcgr3	cytokine metabolic process	0.222957
GO:0043409	2.54861	0.040892	55	6	Dusp3,Dusp6,Igf1,Spred1,Tlr4,Dusp7	negative regulation of MAPK cascade	0.222957
GO:0071219	2.54861	0.040892	55	6	Ccl3,Cd36,Litaf,Ccl2,Tlr4,Ptafr	cellular response to molecule of bacterial origin	0.222957
GO:0006509	4.43621	0.0415682	17	3	Adam8,Adam9,Adam17	membrane protein ectodomain proteolysis	0.222957
GO:0015844	4.43621	0.0415682	17	3	Cd300a,Fcer1g,Fcgr3	monoamine transport	0.222957
GO:0032481	4.43621	0.0415682	17	3	Dhx58,Irf7,Tlr4	positive regulation of type I interferon production	0.222957
GO:0032720	4.43621	0.0415682	17	3	Axl,Tlr4,Arrb2	negative regulation of tumor necrosis factor production	0.222957
GO:0006576	3.3189	0.0433191	29	4	Sat1,Smox,Fabp5,Lpcat2	cellular biogenic amine metabolic process	0.229737
GO:0007628	3.3189	0.0433191	29	4	Npc1,Hexa,Atg7,Arrb2	adult walking behavior	0.229737
GO:0006650	2.27921	0.0455176	71	7	Serinc1,Csf1r,Fabp5,Pgap2,Mtm1,Lpcat2,Pip5k1c	glycerophospholipid metabolic process	0.240048
GO:0043370	4.13994	0.0482201	18	3	Cd83,Il4ra,Il2rg	regulation of CD4-positive, alpha-beta T cell differentiation	0.250144
GO:0046635	3.19071	0.048227	30	4	Cd83,Il4ra,Il2rg,Tgfbr2	positive regulation of alpha-beta T cell activation	0.250144
GO:0050830	3.19071	0.048227	30	4	Cd36,C5ar1,Lyz1,Lyz2	defense response to Gram-positive bacterium	0.250144
GO:0008344	2.40034	0.0509519	58	6	Cstb,App,Npc1,Hexa,Atg7,Arrb2	adult locomotory behavior	0.259992
GO:0040014	2.40034	0.0509519	58	6	Apoe,Sgpl1,Gamt,Lgmn,App,Bcl2	regulation of multicellular organism growth	0.259992
GO:0045580	2.40034	0.0509519	58	6	Cd83,Adam8,Il4ra,Il2rg,Tgfbr2,H2-DMa	regulation of T cell differentiation	0.259992
GO:0016197	2.35451	0.0546136	59	6	Snx6,E430025E21Rik,Snx27,Mtm1,Arl4c,Rab7b	endosomal transport	0.277179
GO:0034446	3.88086	0.0553589	19	3	Axl,Mertk,Dab2	substrate adhesion-dependent cell spreading	0.279459
GO:0050795	2.59585	0.0559427	45	5	Ccl3,Aif1,Nrp1,Ccl2,C3ar1	regulation of behavior	0.280904
GO:0043410	1.88816	0.0568729	133	11	Ccl3,Cd36,Dab2,Fgd4,Csf1r,Adam8,Trf,Nenf,Tlr4,Gpr183,Scimp	positive regulation of MAPK cascade	0.284064
GO:0032787	1.84185	0.061731	136	11	Elovl1,Mid1ip1,Hsd17b4,Pdpn,Akr1a1,Fam213b,Hpgds,Tnfrsf1a,Elovl5,Myo5a,Acaa1a	monocarboxylic acid metabolic process	0.306705
GO:0032615	3.65161	0.0629699	20	3	Cd36,Tlr4,Arrb2	interleukin-12 production	0.307998
GO:0043487	3.65161	0.0629699	20	3	Slc11a1,Tnfrsf1b,Apobec1	regulation of RNA stability	0.307998
GO:0050798	3.65161	0.0629699	20	3	Itgb2,Itgam,Il18	activated T cell proliferation	0.307998
GO:0000187	2.47148	0.0652471	47	5	Dab2,Fgd4,Adam8,Trf,Tlr4	activation of MAPK activity	0.317491
GO:0030183	2.22735	0.0665334	62	6	Il2rg,Gpr183,Adam17,Bcl2,Lgals8,Lgals1	B cell differentiation	0.32209
GO:0007264	1.93641	0.0703477	118	10	Gna12,Rhoa,Dok2,Itsn1,Aif1,Sdcbp,Rap2b,Dgkz,Rap2a,Rap1b	small GTPase mediated signal transduction	0.325937
GO:0043405	1.93641	0.0703477	118	10	Dusp3,Dusp6,Dab2,Fgd4,Adam8,Spred1,Trib1,Trf,Tlr4,Dusp7	regulation of MAP kinase activity	0.325937
GO:0032387	2.7634	0.0707792	34	4	Cd36,Litaf,Cd300a,Bcl2	negative regulation of intracellular transport	0.325937
GO:0032649	2.7634	0.0707792	34	4	Ifnar1,Slc11a1,Tlr4,Il18	regulation of interferon-gamma production	0.325937
GO:0031668	2.18773	0.0708189	63	6	Axl,Ctsd,Fos,Ctsl,Npc1,Usf2	cellular response to extracellular stimulus	0.325937
GO:0030318	3.44825	0.0710369	21	3	Myo5a,Mitf,Bcl2	melanocyte differentiation	0.325937
GO:0034341	3.44825	0.0710369	21	3	Aif1,Slc11a1,Ccl2	response to interferon-gamma	0.325937
GO:0042116	3.44825	0.0710369	21	3	Slc11a1,Il4ra,Tlr4	macrophage activation	0.325937
GO:0046324	3.44825	0.0710369	21	3	Pea15a,Igf1,Pid1	regulation of glucose import	0.325937
GO:0071902	1.985	0.0749785	92	8	Dab2,Fgd4,Csf1r,Adam8,Camk1,Trf,Tlr4,Ccnd1	positive regulation of protein serine/threonine kinase activity	0.325937
GO:0046632	2.3582	0.0753652	49	5	Cd83,Il4ra,Il2rg,Tgfbr2,Bcl2	alpha-beta T cell differentiation	0.325937
GO:0006900	5.16151	0.0756146	10	2	Dab2,Hip1	membrane budding	0.325937
GO:0008333	5.16151	0.0756146	10	2	Snx27,Mtm1	endosome to lysosome transport	0.325937
GO:0010718	5.16151	0.0756146	10	2	Dab2,Zfp703	positive regulation of epithelial to mesenchymal transition	0.325937
GO:0010874	5.16151	0.0756146	10	2	Abcg1,Lrp1	regulation of cholesterol efflux	0.325937
GO:0015804	5.16151	0.0756146	10	2	Serinc1,Slc38a7	neutral amino acid transport	0.325937
GO:0030521	5.16151	0.0756146	10	2	Rhoa,Igf1	androgen receptor signaling pathway	0.325937
GO:0030866	5.16151	0.0756146	10	2	Coro1c,Strip1	cortical actin cytoskeleton organization	0.325937
GO:0031649	5.16151	0.0756146	10	2	Tnfrsf11a,Ptger3	heat generation	0.325937
GO:0032722	5.16151	0.0756146	10	2	Il4ra,Tlr4	positive regulation of chemokine production	0.325937
GO:0033599	5.16151	0.0756146	10	2	Ccnd1,Zfp703	regulation of mammary gland epithelial cell proliferation	0.325937
GO:0034381	5.16151	0.0756146	10	2	Cd36,Msr1	plasma lipoprotein particle clearance	0.325937
GO:0048260	5.16151	0.0756146	10	2	Dab2,Hip1	positive regulation of receptor-mediated endocytosis	0.325937
GO:0050872	5.16151	0.0756146	10	2	Cebpa,Fabp4	white fat cell differentiation	0.325937
GO:0050871	2.67382	0.0771305	35	4	Il2rg,Tlr4,Gpr183,Tnfsf13	positive regulation of B cell activation	0.33096
GO:0001974	3.26622	0.0795421	22	3	Acvrl1,Axl,Igf1	blood vessel remodeling	0.336716
GO:0042088	3.26622	0.0795421	22	3	Slc11a1,Il4ra,Il18	T-helper 1 type immune response	0.336716
GO:0046323	3.26622	0.0795421	22	3	Pea15a,Igf1,Pid1	glucose import	0.336716
GO:0070201	1.81607	0.082022	125	10	Ccl3,Cd36,Prkaca,Litaf,Clec4n,Clec5a,Camk1,Il4ra,AF251705,Kcnn4	regulation of establishment of protein localization	0.345664
GO:0014070	1.8001	0.0841254	126	10	Ccl3,Cd36,Cd83,Ctsl,Npc1,Adam9,Tgfbr2,Cebpa,Bcl2,Naip2	response to organic cyclic compound	0.352953
GO:0007265	1.8934	0.0866332	96	8	Gna12,Rhoa,Dok2,Aif1,Sdcbp,Rap2b,Dgkz,Rap2a	Ras protein signal transduction	0.353626
GO:0032147	2.11202	0.0879765	76	7	Dab2,Fgd4,Adam8,Slc11a1,Tgfbr2,Trf,Tlr4	activation of protein kinase activity	0.353626
GO:0002437	3.10241	0.0884666	23	3	Fcgr1,Fcer1g,Fcgr3	inflammatory response to antigenic stimulus	0.353626
GO:0045055	3.10241	0.0884666	23	3	Ccl3,Cd300a,Fcer1g	regulated secretory pathway	0.353626
GO:0030540	4.58747	0.0896661	11	2	Axl,Mertk	female genitalia development	0.353626
GO:0030857	4.58747	0.0896661	11	2	Acvrl1,Ccnd1	negative regulation of epithelial cell differentiation	0.353626
GO:0032374	4.58747	0.0896661	11	2	Abcg1,Lrp1	regulation of cholesterol transport	0.353626
GO:0032732	4.58747	0.0896661	11	2	Ccl3,Tlr4	positive regulation of interleukin-1 production	0.353626
GO:0043304	4.58747	0.0896661	11	2	Cd300a,Fcer1g	regulation of mast cell degranulation	0.353626
GO:0045931	4.58747	0.0896661	11	2	Dusp3,App	positive regulation of mitotic cell cycle	0.353626
GO:0051646	4.58747	0.0896661	11	2	Mtm1,Kif1b	mitochondrion localization	0.353626
GO:0060442	4.58747	0.0896661	11	2	Rxra,Igf1	branching involved in prostate gland morphogenesis	0.353626
GO:0071526	4.58747	0.0896661	11	2	Nrp1,Plxnb2	semaphorin-plexin signaling pathway	0.353626
GO:0006470	2.08141	0.0903538	77	7	Dusp3,Dusp6,Nceh1,Ptpro,Mtm1,Dusp7,Bcl2	protein dephosphorylation	0.353626
GO:0009991	2.08141	0.0903538	77	7	Axl,Ctsd,Fos,Ctsl,Npc1,Atg7,Usf2	response to extracellular stimulus	0.353626
GO:0009308	2.51083	0.0906541	37	4	Sat1,Smox,Fabp5,Lpcat2	amine metabolic process	0.353626
GO:0010951	2.51083	0.0906541	37	4	Serpinb8,Serpinb6a,Serpinb2,Serpinb10	negative regulation of endopeptidase activity	0.353626
GO:0030098	1.67047	0.0973467	176	13	Axl,Mertk,Cd83,Adam8,Il4ra,Il2rg,Tgfbr2,H2-DMa,Gpr183,Adam17,Bcl2,Lgals8,Lgals1	lymphocyte differentiation	0.374761
GO:0043407	2.43658	0.0978138	38	4	Dusp3,Dusp6,Spred1,Dusp7	negative regulation of MAP kinase activity	0.374761
GO:0033077	2.1602	0.0979867	53	5	Adam8,Il2rg,H2-DMa,Adam17,Bcl2	T cell differentiation in thymus	0.374761
GO:0001776	2.11569	0.104124	54	5	Ccl2,Adam17,Bcl2,Fcer1g,Pirb	leukocyte homeostasis	0.374761
GO:0001773	4.12783	0.104409	12	2	Tgfbr2,Pirb	myeloid dendritic cell activation	0.374761
GO:0001893	4.12783	0.104409	12	2	Rxra,Ctsl	maternal placenta development	0.374761
GO:0001945	4.12783	0.104409	12	2	Acvrl1,Pdpn	lymph vessel development	0.374761
GO:0002467	4.12783	0.104409	12	2	Adam17,Tnfsf13	germinal center formation	0.374761
GO:0009410	4.12783	0.104409	12	2	Ahr,Nceh1	response to xenobiotic stimulus	0.374761
GO:0010829	4.12783	0.104409	12	2	Pea15a,Pid1	negative regulation of glucose transport	0.374761
GO:0030225	4.12783	0.104409	12	2	Itgam,Cebpa	macrophage differentiation	0.374761
GO:0030865	4.12783	0.104409	12	2	Coro1c,Strip1	cortical cytoskeleton organization	0.374761
GO:0032728	4.12783	0.104409	12	2	Irf7,Tlr4	positive regulation of interferon-beta production	0.374761
GO:0034122	4.12783	0.104409	12	2	Rab7b,Arrb2	negative regulation of toll-like receptor signaling pathway	0.374761
GO:0042147	4.12783	0.104409	12	2	Snx6,Rab7b	retrograde transport, endosome to Golgi	0.374761
GO:0043368	4.12783	0.104409	12	2	H2-DMa,Bcl2	positive T cell selection	0.374761
GO:0046825	4.12783	0.104409	12	2	Prkaca,Camk1	regulation of protein export from nucleus	0.374761
GO:0046889	4.12783	0.104409	12	2	Mid1ip1,Abcg1	positive regulation of lipid biosynthetic process	0.374761
GO:0051180	4.12783	0.104409	12	2	Slc52a2,Folr2	vitamin transport	0.374761
GO:0051351	4.12783	0.104409	12	2	Mid1ip1,Trib1	positive regulation of ligase activity	0.374761
GO:0071622	4.12783	0.104409	12	2	Ccl2,C3ar1	regulation of granulocyte chemotaxis	0.374761
GO:0002683	1.82179	0.105422	112	9	Axl,Dusp3,Mertk,Dhx58,Il4ra,Cd300a,Rab7b,Socs6,Arrb2	negative regulation of immune system process	0.376962
GO:0060563	2.81945	0.107493	25	3	Myo5a,Mitf,Bcl2	neuroepithelial cell differentiation	0.382918
GO:0006644	1.91509	0.108386	83	7	Serinc1,Csf1r,Fabp5,Pgap2,Mtm1,Lpcat2,Pip5k1c	phospholipid metabolic process	0.383558
GO:0001503	1.68927	0.108485	147	11	Ccl3,Rhoa,Igf1,Nab2,Fam20c,Tnfrsf11a,Creb3l1,Clec5a,Cebpa,Mmp13,Bcl2	ossification	0.383558
GO:0040013	2.0731	0.110447	55	5	Nrp1,Rap2b,Lrp1,Rap2a,Bcl2	negative regulation of locomotion	0.387591
GO:0072593	2.0731	0.110447	55	5	Cd36,Cybb,Sh3pxd2b,Pid1,Bcl2	reactive oxygen species metabolic process	0.387591
GO:0019221	1.88989	0.111995	84	7	Irf7,Tnfrsf11a,Jak1,Tnfrsf1b,Pf4,Tnfrsf1a,Pirb	cytokine-mediated signaling pathway	0.391568
GO:0010466	2.30048	0.112893	40	4	Serpinb8,Serpinb6a,Serpinb2,Serpinb10	negative regulation of peptidase activity	0.393249
GO:0003014	2.69642	0.117552	26	3	Ptpro,Ptger3,Bcl2	renal system process	0.400862
GO:0043523	1.84121	0.119705	86	7	Ccl3,Axl,Rhoa,Itsn1,Adam8,Sigmar1,Bcl2	regulation of neuron apoptotic process	0.400862
GO:0016044	3.75167	0.119749	13	2	Atg7,Lpcat2	cellular membrane organization	0.400862
GO:0031529	3.75167	0.119749	13	2	Aif1,Csf1r	ruffle organization	0.400862
GO:0033688	3.75167	0.119749	13	2	Rhoa,Bcl2	regulation of osteoblast proliferation	0.400862
GO:0034605	3.75167	0.119749	13	2	Tfec,Myof	cellular response to heat	0.400862
GO:0042168	3.75167	0.119749	13	2	Blvra,Hmox1	heme metabolic process	0.400862
GO:0043303	3.75167	0.119749	13	2	Cd300a,Fcer1g	mast cell degranulation	0.400862
GO:0070555	3.75167	0.119749	13	2	Tnfrsf11a,Ccl2	response to interleukin-1	0.400862
GO:0071346	3.75167	0.119749	13	2	Aif1,Ccl2	cellular response to interferon-gamma	0.400862
GO:0097028	3.75167	0.119749	13	2	Tgfbr2,Pirb	dendritic cell differentiation	0.400862
GO:0001934	1.57591	0.12046	200	14	Cd36,Dab2,Fgd4,Csf1r,Adam8,Slc11a1,Camk1,Tgfbr2,Trf,Rap2b,Tlr4,Rap2a,Bcl2,Ccnd1	positive regulation of protein phosphorylation	0.401518
GO:0006665	2.23785	0.120796	41	4	Elovl1,Serinc1,Hexa,Pla2g15	sphingolipid metabolic process	0.401518
GO:0051347	1.65041	0.126805	164	12	Serinc1,Dab2,Fgd4,Csf1r,Adam8,Slc11a1,Camk1,Tgfbr2,Trib1,Trf,Tlr4,Ccnd1	positive regulation of transferase activity	0.419688
GO:0006497	2.58349	0.127948	27	3	Atg10,Atg7,Pgap2	protein lipidation	0.419688
GO:0043507	2.58349	0.127948	27	3	Dab2,Fgd4,Trf	positive regulation of JUN kinase activity	0.419688
GO:0015758	2.17851	0.12893	42	4	Pea15a,Igf1,Fabp5,Pid1	glucose transport	0.419688
GO:0016051	2.17851	0.12893	42	4	Igf1,Atf3,Akr1a1,Gnpda1	carbohydrate biosynthetic process	0.419688
GO:0055088	2.17851	0.12893	42	4	Apoe,Npc2,Usf2,Fabp4	lipid homeostasis	0.419688
GO:0046328	2.00953	0.13318	68	6	Dusp3,Dab2,Fgd4,Trf,Tlr4,Rap2a	regulation of JNK cascade	0.432036
GO:0001662	3.4388	0.1356	14	2	Penk,Bcl2	behavioral fear response	0.432453
GO:0006829	3.4388	0.1356	14	2	Slc39a1,Slc30a7	zinc ion transport	0.432453
GO:0010717	3.4388	0.1356	14	2	Dab2,Zfp703	regulation of epithelial to mesenchymal transition	0.432453
GO:0030166	3.4388	0.1356	14	2	Igf1,Cant1	proteoglycan biosynthetic process	0.432453
GO:0031952	3.4388	0.1356	14	2	Rap2b,Rap2a	regulation of protein autophosphorylation	0.432453
GO:0032609	2.12218	0.137286	43	4	Ifnar1,Slc11a1,Tlr4,Il18	interferon-gamma production	0.433417
GO:0043123	2.12218	0.137286	43	4	Cd36,Rhoa,Clec4n,Tlr4	positive regulation of I-kappaB kinase/NF-kappaB cascade	0.433417
GO:0051924	2.12218	0.137286	43	4	Ccl3,Saraf,Myo5a,Bcl2	regulation of calcium ion transport	0.433417
GO:0010827	2.47983	0.138657	28	3	Pea15a,Igf1,Pid1	regulation of glucose transport	0.433417
GO:0030032	2.47983	0.138657	28	3	Fgd4,Ptpro,Arhgef7	lamellipodium assembly	0.433417
GO:0060425	2.47983	0.138657	28	3	Igf1,Ctsh,Tgfbr2	lung morphogenesis	0.433417
GO:0051402	1.80963	0.141201	100	8	Ccl3,Axl,Rhoa,App,Itsn1,Adam8,Sigmar1,Bcl2	neuron apoptotic process	0.439913
GO:0045860	1.64081	0.145723	137	10	Dab2,Fgd4,Csf1r,Adam8,Slc11a1,Camk1,Tgfbr2,Trf,Tlr4,Ccnd1	positive regulation of protein kinase activity	0.441156
GO:0031589	1.77052	0.145789	102	8	Axl,Rhoa,Mertk,Dab2,Adam8,Spp1,Sirpa,Bcl2	cell-substrate adhesion	0.441156
GO:0042594	2.06889	0.145855	44	4	Ctsd,Ctsl,Npc1,Atg7	response to starvation	0.441156
GO:0046488	2.06889	0.145855	44	4	Csf1r,Pgap2,Mtm1,Pip5k1c	phosphatidylinositol metabolic process	0.441156
GO:0042632	2.38406	0.149657	29	3	Apoe,Npc2,Fabp4	cholesterol homeostasis	0.441156
GO:0060322	2.38406	0.149657	29	3	Sgpl1,Asph,Pgap1	head development	0.441156
GO:0060840	2.38406	0.149657	29	3	Acvrl1,Apoe,Lrp1	artery development	0.441156
GO:0070997	1.73298	0.151068	104	8	Ccl3,Axl,Rhoa,App,Itsn1,Adam8,Sigmar1,Bcl2	neuron death	0.441156
GO:0006885	3.1738	0.151881	15	2	Atp6v0c,Slc11a1	regulation of pH	0.441156
GO:0008038	3.1738	0.151881	15	2	App,Nrp1	neuron recognition	0.441156
GO:0009620	3.1738	0.151881	15	2	Clec4n,Clec7a	response to fungus	0.441156
GO:0010259	3.1738	0.151881	15	2	Ctsl,Serp1	multicellular organismal aging	0.441156
GO:0032651	3.1738	0.151881	15	2	Ccl3,Arrb2	regulation of interleukin-1 beta production	0.441156
GO:0033003	3.1738	0.151881	15	2	Cd300a,Fcer1g	regulation of mast cell activation	0.441156
GO:0033081	3.1738	0.151881	15	2	Adam8,Il2rg	regulation of T cell differentiation in thymus	0.441156
GO:0033143	3.1738	0.151881	15	2	Rhoa,Igf1	regulation of intracellular steroid hormone receptor signaling pathway	0.441156
GO:0033687	3.1738	0.151881	15	2	Rhoa,Bcl2	osteoblast proliferation	0.441156
GO:0043271	3.1738	0.151881	15	2	Cd300a,Bcl2	negative regulation of ion transport	0.441156
GO:0045600	3.1738	0.151881	15	2	Cebpa,Sh3pxd2b	positive regulation of fat cell differentiation	0.441156
GO:0060039	3.1738	0.151881	15	2	Rxra,Pdpn	pericardium development	0.441156
GO:0070059	3.1738	0.151881	15	2	Dnajc10,Bcl2	intrinsic apoptotic signaling pathway in response to endoplasmic reticulum stress	0.441156
GO:0072384	3.1738	0.151881	15	2	Ndel1,Kif1b	organelle transport along microtubule	0.441156
GO:0007626	1.71479	0.15396	105	8	Cstb,App,Npc1,Hexa,Atg7,Myo5a,Arrb2,Sepp1	locomotory behavior	0.445822
GO:0034976	2.01807	0.154627	45	4	Dnajc10,Serp1,Bcl2,Ccnd1	response to endoplasmic reticulum stress	0.446384
GO:0006457	2.29544	0.160927	30	3	H2-DMb2,H2-DMa,H2-DMb1	protein folding	0.457576
GO:0043367	2.29544	0.160927	30	3	Cd83,Il4ra,Il2rg	CD4-positive, alpha-beta T cell differentiation	0.457576
GO:0045862	2.29544	0.160927	30	3	Adam8,Adam9,Trib1	positive regulation of proteolysis	0.457576
GO:0048066	2.29544	0.160927	30	3	Myo5a,Mitf,Bcl2	developmental pigmentation	0.457576
GO:0055092	2.29544	0.160927	30	3	Apoe,Npc2,Fabp4	sterol homeostasis	0.457576
GO:0008643	1.96967	0.163592	46	4	Pea15a,Igf1,Fabp5,Pid1	carbohydrate transport	0.462367
GO:0050679	1.96967	0.163592	46	4	Acvrl1,Grn,Ccnd1,Zfp703	positive regulation of epithelial cell proliferation	0.462367
GO:0043583	1.64564	0.16713	109	8	Igf1,Myo7a,Cebpa,C1qb,H2-DMa,Maf,Bcl2,Mafb	ear development	0.465152
GO:0015698	2.94665	0.168519	16	2	Slc11a1,P2ry6	inorganic anion transport	0.465152
GO:0030219	2.94665	0.168519	16	2	Pf4,Rab7b	megakaryocyte differentiation	0.465152
GO:0042596	2.94665	0.168519	16	2	Penk,Bcl2	fear response	0.465152
GO:0042992	2.94665	0.168519	16	2	Cd36,Litaf	negative regulation of transcription factor import into nucleus	0.465152
GO:0051881	2.94665	0.168519	16	2	Pid1,Bcl2	regulation of mitochondrial membrane potential	0.465152
GO:0060749	2.94665	0.168519	16	2	Tnfrsf11a,Ccnd1	mammary gland alveolus development	0.465152
GO:0061377	2.94665	0.168519	16	2	Tnfrsf11a,Ccnd1	mammary gland lobule development	0.465152
GO:0001525	1.5817	0.17144	156	11	Acvrl1,Rxra,Adam8,Nrp1,Pf4,Ctsh,Tgfbr2,Ccl12,Ccl2,Il18,C3ar1	angiogenesis	0.467781
GO:0009791	1.75188	0.171627	77	6	Sgpl1,Serp1,Atg7,Myo7a,Bcl2,Sepp1	post-embryonic development	0.467781
GO:0032872	1.75188	0.171627	77	6	Dusp3,Dab2,Fgd4,Trf,Tlr4,Rap2a	regulation of stress-activated MAPK cascade	0.467781
GO:0045619	1.75188	0.171627	77	6	Cd83,Adam8,Il4ra,Il2rg,Tgfbr2,H2-DMa	regulation of lymphocyte differentiation	0.467781
GO:0035710	2.21315	0.172445	31	3	Cd83,Il4ra,Il2rg	CD4-positive, alpha-beta T cell activation	0.467781
GO:0042108	2.21315	0.172445	31	3	Tlr4,Tlr1,Fcgr3	positive regulation of cytokine biosynthetic process	0.467781
GO:0007254	1.72723	0.176909	78	6	Dusp3,Dab2,Fgd4,Trf,Tlr4,Rap2a	JNK cascade	0.47715
GO:0030534	1.72723	0.176909	78	6	Cstb,App,Npc1,Hexa,Atg7,Arrb2	adult behavior	0.47715
GO:0032880	1.51712	0.183335	162	11	Ccl3,Cd36,Prkaca,Litaf,Clec4n,Clec5a,Camk1,Il4ra,AF251705,Kcnn4,Bcl2	regulation of protein localization	0.482984
GO:0007589	2.13632	0.184188	32	3	Kcnn4,Usf2,Ccnd1	body fluid secretion	0.482984
GO:0008088	2.13632	0.184188	32	3	Ndel1,App,Kif1b	axon cargo transport	0.482984
GO:0001659	2.74979	0.185446	17	2	Tnfrsf11a,Ptger3	temperature homeostasis	0.482984
GO:0019319	2.74979	0.185446	17	2	Atf3,Gnpda1	hexose biosynthetic process	0.482984
GO:0030858	2.74979	0.185446	17	2	Acvrl1,Bcl2	positive regulation of epithelial cell differentiation	0.482984
GO:0032648	2.74979	0.185446	17	2	Irf7,Tlr4	regulation of interferon-beta production	0.482984
GO:0042551	2.74979	0.185446	17	2	App,Bcl2	neuron maturation	0.482984
GO:0045104	2.74979	0.185446	17	2	Ndel1,Mtm1	intermediate filament cytoskeleton organization	0.482984
GO:0048536	2.74979	0.185446	17	2	Adam17,Bcl2	spleen development	0.482984
GO:0048873	2.74979	0.185446	17	2	Lipa,Bcl2	homeostasis of number of cells within a tissue	0.482984
GO:0060325	2.74979	0.185446	17	2	Sgpl1,Asph	face morphogenesis	0.482984
GO:0006643	2.03205	0.185724	56	5	Elovl1,Serinc1,Hexa,Pgap2,Pla2g15	membrane lipid metabolic process	0.482984
GO:0030522	1.95467	0.192962	58	5	Rhoa,Rxra,Dhx58,Igf1,Tlr4	intracellular receptor mediated signaling pathway	0.499058
GO:0043524	1.95467	0.192962	58	5	Axl,Rhoa,Itsn1,Adam8,Bcl2	negative regulation of neuron apoptotic process	0.499058
GO:1901214	1.77295	0.194244	89	7	Ccl3,Axl,Rhoa,Itsn1,Adam8,Sigmar1,Bcl2	regulation of neuron death	0.501
GO:0045834	2.06475	0.196136	33	3	Apoe,Mid1ip1,Abcg1	positive regulation of lipid metabolic process	0.504503
GO:0042326	1.57216	0.197923	128	9	Dusp3,Dusp6,Igf1,Dnajc10,Spred1,Inpp5j,Tlr4,Dusp7,Fabp4	negative regulation of phosphorylation	0.507716
GO:0001779	2.57739	0.202599	18	2	Axl,Mertk	natural killer cell differentiation	0.511373
GO:0006778	2.57739	0.202599	18	2	Blvra,Hmox1	porphyrin-containing compound metabolic process	0.511373
GO:0010634	2.57739	0.202599	18	2	Ctsh,Tgfbr2	positive regulation of epithelial cell migration	0.511373
GO:0032611	2.57739	0.202599	18	2	Ccl3,Arrb2	interleukin-1 beta production	0.511373
GO:0045103	2.57739	0.202599	18	2	Ndel1,Mtm1	intermediate filament-based process	0.511373
GO:0071383	2.57739	0.202599	18	2	Npc1,Naip2	cellular response to steroid hormone stimulus	0.511373
GO:0030850	1.99779	0.208268	34	3	Rxra,Ahr,Igf1	prostate gland development	0.521666
GO:0050885	1.99779	0.208268	34	3	App,Hexa,Tpp1	neuromuscular process controlling balance	0.521666
GO:0016337	1.51988	0.209842	132	9	Itgb2,Plek,Adam8,Cd93,Pdpn,Itgam,Bcl2,Clec7a,Zfp703	cell-cell adhesion	0.521666
GO:0002768	1.8161	0.211098	62	5	Dusp3,Fcgr1,Fcer1g,Fcgr3,Clec7a	immune response-regulating cell surface receptor signaling pathway	0.521666
GO:0031667	1.8161	0.211098	62	5	Ctsd,Ctsl,Npc1,Atg7,Usf2	response to nutrient levels	0.521666
GO:0046631	1.8161	0.211098	62	5	Cd83,Il4ra,Il2rg,Tgfbr2,Bcl2	alpha-beta T cell activation	0.521666
GO:0048469	1.8161	0.211098	62	5	Prkaca,App,Fam20c,Cebpa,Bcl2	cell maturation	0.521666
GO:0051250	1.8161	0.211098	62	5	Axl,Dusp3,Mertk,Il4ra,Socs6	negative regulation of lymphocyte activation	0.521666
GO:0048839	1.61294	0.218624	97	7	Igf1,Myo7a,Cebpa,C1qb,H2-DMa,Maf,Mafb	inner ear development	0.527114
GO:0007566	2.42549	0.219921	19	2	Rxra,Grn	embryo implantation	0.527114
GO:0015908	2.42549	0.219921	19	2	Tnfrsf11a,Plin2	fatty acid transport	0.527114
GO:0032608	2.42549	0.219921	19	2	Irf7,Tlr4	interferon-beta production	0.527114
GO:0034333	2.42549	0.219921	19	2	Bcl2,Zfp703	adherens junction assembly	0.527114
GO:0042311	2.42549	0.219921	19	2	Apoe,P2rx4	vasodilation	0.527114
GO:0043488	2.42549	0.219921	19	2	Slc11a1,Apobec1	regulation of mRNA stability	0.527114
GO:2000377	2.42549	0.219921	19	2	Cd36,Pid1	regulation of reactive oxygen species metabolic process	0.527114
GO:0010954	1.93504	0.220562	35	3	Adam8,Adam9,Trib1	positive regulation of protein processing	0.527114
GO:0016050	1.93504	0.220562	35	3	Dab2,Hip1,Bcl2	vesicle organization	0.527114
GO:0043506	1.93504	0.220562	35	3	Dab2,Fgd4,Trf	regulation of JUN kinase activity	0.527114
GO:0045638	1.93504	0.220562	35	3	Ccl3,Pf4,Lmo2	negative regulation of myeloid cell differentiation	0.527114
GO:0045787	1.93504	0.220562	35	3	Dusp3,App,Ccnd1	positive regulation of cell cycle	0.527114
GO:0033674	1.49574	0.232005	149	10	Dab2,Fgd4,Csf1r,Adam8,Slc11a1,Camk1,Tgfbr2,Trf,Tlr4,Ccnd1	positive regulation of kinase activity	0.547844
GO:0001909	1.87611	0.232998	36	3	Fcgr1,Ctsh,Fcgr3	leukocyte mediated cytotoxicity	0.547844
GO:0007043	2.29043	0.23736	20	2	Rhoa,Ptpro	cell-cell junction assembly	0.547844
GO:0007586	2.29043	0.23736	20	2	Tlr4,Kcnn4	digestion	0.547844
GO:0007595	2.29043	0.23736	20	2	Usf2,Ccnd1	lactation	0.547844
GO:0030890	2.29043	0.23736	20	2	Tlr4,Gpr183	positive regulation of B cell proliferation	0.547844
GO:0035162	2.29043	0.23736	20	2	Tgfbr2,Lmo2	embryonic hemopoiesis	0.547844
GO:0040036	2.29043	0.23736	20	2	Dusp6,Fam20c	regulation of fibroblast growth factor receptor signaling pathway	0.547844
GO:0045670	2.29043	0.23736	20	2	Ccl3,Mitf	regulation of osteoclast differentiation	0.547844
GO:0060135	2.29043	0.23736	20	2	Rxra,Ctsl	maternal process involved in female pregnancy	0.547844
GO:0060323	2.29043	0.23736	20	2	Sgpl1,Asph	head morphogenesis	0.547844
GO:0060324	2.29043	0.23736	20	2	Sgpl1,Asph	face development	0.547844
GO:0061097	2.29043	0.23736	20	2	App,Rap2b	regulation of protein tyrosine kinase activity	0.547844
GO:2000045	2.29043	0.23736	20	2	Aif1,Ccnd1	regulation of G1/S transition of mitotic cell cycle	0.547844
GO:0043122	1.66815	0.23969	67	5	Cd36,Rhoa,Litaf,Clec4n,Tlr4	regulation of I-kappaB kinase/NF-kappaB cascade	0.551269
GO:0006816	1.52661	0.240012	102	7	Ccl3,Anxa6,Atp2b1,P2rx4,Saraf,Myo5a,Bcl2	calcium ion transport	0.551269
GO:0001656	1.82048	0.245558	37	3	Ctsh,Aph1c,Bcl2	metanephros development	0.562638
GO:0051046	1.43222	0.247654	155	10	Ccl3,Clec4n,Tnfrsf11a,Serp1,Clec5a,Il4ra,Cd300a,AF251705,Kcnn4,Fcer1g	regulation of secretion	0.566067
GO:0001782	2.16942	0.254868	21	2	Bcl2,Pirb	B cell homeostasis	0.571486
GO:0002053	2.16942	0.254868	21	2	Tgfbr2,Fbxw4	positive regulation of mesenchymal cell proliferation	0.571486
GO:0030968	2.16942	0.254868	21	2	Serp1,Ccnd1	endoplasmic reticulum unfolded protein response	0.571486
GO:0032642	2.16942	0.254868	21	2	Il4ra,Tlr4	regulation of chemokine production	0.571486
GO:0033598	2.16942	0.254868	21	2	Ccnd1,Zfp703	mammary gland epithelial cell proliferation	0.571486
GO:0042308	2.16942	0.254868	21	2	Cd36,Litaf	negative regulation of protein import into nucleus	0.571486
GO:0045058	2.16942	0.254868	21	2	H2-DMa,Bcl2	T cell selection	0.571486
GO:2000107	2.16942	0.254868	21	2	Fcer1g,Ccr5	negative regulation of leukocyte apoptotic process	0.571486
GO:0042113	1.53695	0.258207	116	8	Il2rg,Tlr4,Gpr183,Adam17,Bcl2,Lgals8,Lgals1,Tnfsf13	B cell activation	0.576268
GO:0045732	1.7682	0.258222	38	3	Adam8,Adam9,Trib1	positive regulation of protein catabolic process	0.576268
GO:0071560	1.59027	0.259475	70	5	Acvrl1,Dab2,Adam9,Adam17,Zfp703	cellular response to transforming growth factor beta stimulus	0.577699
GO:0006873	1.48094	0.270172	120	8	Ccl3,Apoe,App,Atp6v0c,Slc11a1,Ptger3,Slc30a7,Bcl2	cellular ion homeostasis	0.595211
GO:0009408	2.06063	0.272401	22	2	Tfec,Myof	response to heat	0.595211
GO:0010332	2.06063	0.272401	22	2	Apobec1,Bcl2	response to gamma radiation	0.595211
GO:0034620	2.06063	0.272401	22	2	Serp1,Ccnd1	cellular response to unfolded protein	0.595211
GO:0048010	2.06063	0.272401	22	2	Nrp1,Myof	vascular endothelial growth factor receptor signaling pathway	0.595211
GO:0060512	2.06063	0.272401	22	2	Rxra,Igf1	prostate gland morphogenesis	0.595211
GO:0060740	2.06063	0.272401	22	2	Rxra,Igf1	prostate gland epithelium morphogenesis	0.595211
GO:0032943	1.46756	0.273574	121	8	Itgb2,Aif1,Slc11a1,Itgam,Tlr4,Il18,Gpr183,Bcl2	mononuclear cell proliferation	0.595211
GO:0046651	1.46756	0.273574	121	8	Itgb2,Aif1,Slc11a1,Itgam,Tlr4,Il18,Gpr183,Bcl2	lymphocyte proliferation	0.595211
GO:0030879	1.67992	0.273646	80	6	Igf1,Tnfrsf11a,Tgfbr2,Usf2,Ccnd1,Zfp703	mammary gland development	0.595211
GO:0030336	1.92354	0.27868	47	4	Rap2b,Lrp1,Rap2a,Bcl2	negative regulation of cell migration	0.604768
GO:0031669	1.87951	0.283039	48	4	Ctsd,Ctsl,Npc1,Usf2	cellular response to nutrient levels	0.610899
GO:2000146	1.87951	0.283039	48	4	Rap2b,Lrp1,Rap2a,Bcl2	negative regulation of cell motility	0.610899
GO:0030217	1.4288	0.284693	124	8	Cd83,Adam8,Il4ra,Il2rg,Tgfbr2,H2-DMa,Adam17,Bcl2	T cell differentiation	0.610899
GO:0008584	1.83726	0.287792	49	4	Sgpl1,Ctsl,Hsd17b4,Bcl2	male gonad development	0.610899
GO:0043473	1.83726	0.287792	49	4	Myo7a,Myo5a,Mitf,Bcl2	pigmentation	0.610899
GO:0046546	1.83726	0.287792	49	4	Sgpl1,Ctsl,Hsd17b4,Bcl2	development of primary male sexual characteristics	0.610899
GO:0006801	1.96218	0.289918	23	2	Cd36,Sh3pxd2b	superoxide metabolic process	0.610899
GO:0006835	1.96218	0.289918	23	2	Folr2,Slc38a7	dicarboxylic acid transport	0.610899
GO:0007601	1.96218	0.289918	23	2	Myo7a,Myo5a	visual perception	0.610899
GO:0016525	1.96218	0.289918	23	2	Pf4,Ccl2	negative regulation of angiogenesis	0.610899
GO:0021955	1.96218	0.289918	23	2	Ndel1,Atg7	central nervous system neuron axonogenesis	0.610899
GO:0031663	1.96218	0.289918	23	2	Ccl3,Ptafr	lipopolysaccharide-mediated signaling pathway	0.610899
GO:0048008	1.96218	0.289918	23	2	Sgpl1,Lrp1	platelet-derived growth factor receptor signaling pathway	0.610899
GO:0001501	1.38624	0.291571	192	12	Acp2,Rhoa,Sgpl1,Hexa,Nab2,Fam20c,Serp1,Tgfbr2,Sh3pxd2b,Fbxw4,Mmp13,Maf	skeletal system development	0.61176
GO:0000082	1.79707	0.292919	50	4	Aif1,Cables1,Bcl2,Ccnd1	G1/S transition of mitotic cell cycle	0.61176
GO:0051271	1.79707	0.292919	50	4	Rap2b,Lrp1,Rap2a,Bcl2	negative regulation of cellular component movement	0.61176
GO:0071901	1.79707	0.292919	50	4	Dusp3,Dusp6,Spred1,Dusp7	negative regulation of protein serine/threonine kinase activity	0.61176
GO:0009725	1.48285	0.294462	135	9	Prkaca,Ctsl,Npc1,Ptpra,Adam9,Myo5a,Pid1,Bcl2,Naip2	response to hormone stimulus	0.613624
GO:0010035	1.53273	0.298338	87	6	Cd36,Hmox1,Fos,Cebpa,Bcl2,Fabp4	response to inorganic substance	0.614769
GO:0008360	1.75852	0.298398	51	4	Gna12,Ccl3,Csf1r,Plxnb2	regulation of cell shape	0.614769
GO:0050671	1.75852	0.298398	51	4	Aif1,Tlr4,Il18,Gpr183	positive regulation of lymphocyte proliferation	0.614769
GO:0002262	1.51376	0.302753	88	6	Axl,Dnase2a,Lmo2,Ccl2,Adam17,Fcer1g	myeloid cell homeostasis	0.614769
GO:0031098	1.49525	0.307365	89	6	Dusp3,Dab2,Fgd4,Trf,Tlr4,Rap2a	stress-activated protein kinase signaling cascade	0.614769
GO:0051403	1.49525	0.307365	89	6	Dusp3,Dab2,Fgd4,Trf,Tlr4,Rap2a	stress-activated MAPK cascade	0.614769
GO:0001836	1.87273	0.307384	24	2	Igf1,Bcl2	release of cytochrome c from mitochondria	0.614769
GO:0006611	1.87273	0.307384	24	2	Prkaca,Camk1	protein export from nucleus	0.614769
GO:0006809	1.87273	0.307384	24	2	P2rx4,Tlr4	nitric oxide biosynthetic process	0.614769
GO:0010464	1.87273	0.307384	24	2	Tgfbr2,Fbxw4	regulation of mesenchymal cell proliferation	0.614769
GO:0032623	1.87273	0.307384	24	2	Cd83,Slc11a1	interleukin-2 production	0.614769
GO:0034109	1.87273	0.307384	24	2	Plek,Zfp703	homotypic cell-cell adhesion	0.614769
GO:0034332	1.87273	0.307384	24	2	Bcl2,Zfp703	adherens junction organization	0.614769
GO:0042770	1.87273	0.307384	24	2	Spred1,Pgap2	signal transduction in response to DNA damage	0.614769
GO:0042990	1.87273	0.307384	24	2	Cd36,Litaf	regulation of transcription factor import into nucleus	0.614769
GO:0048286	1.87273	0.307384	24	2	Igf1,Pdpn	lung alveolus development	0.614769
GO:0048806	1.87273	0.307384	24	2	Axl,Mertk	genitalia development	0.614769
GO:0050873	1.87273	0.307384	24	2	Cebpa,Fabp4	brown fat cell differentiation	0.614769
GO:0050953	1.87273	0.307384	24	2	Myo7a,Myo5a	sensory perception of light stimulus	0.614769
GO:0006006	1.68613	0.310334	53	4	Igf1,Atf3,Fabp5,Serp1	glucose metabolic process	0.616747
GO:0007160	1.68613	0.310334	53	4	Rhoa,Adam8,Sirpa,Bcl2	cell-matrix adhesion	0.616747
GO:0030308	1.68613	0.310334	53	4	Nrp1,Zmat3,Sertad2,Bcl2	negative regulation of cell growth	0.616747
GO:0048872	1.37122	0.319601	145	9	Axl,Dnase2a,Lipa,Lmo2,Ccl2,Adam17,Bcl2,Fcer1g,Pirb	homeostasis of number of cells	0.633831
GO:0008610	1.36096	0.322893	146	9	Elovl1,Mid1ip1,Abcg1,Fabp5,Fam213b,Pgap2,Elovl5,Lpcat2,Myo5a	lipid biosynthetic process	0.63474
GO:0042552	1.61941	0.323443	55	4	Pmp22,Hexa,Nab2,Myo5a	myelination	0.63474
GO:0007338	1.79093	0.324766	25	2	Tpst2,Gnpda1	single fertilization	0.63474
GO:0016236	1.79093	0.324766	25	2	Ctsd,Npc1	macroautophagy	0.63474
GO:0019218	1.79093	0.324766	25	2	Apoe,Abcg1	regulation of steroid metabolic process	0.63474
GO:0033135	1.79093	0.324766	25	2	Inpp5j,Bcl2	regulation of peptidyl-serine phosphorylation	0.63474
GO:0048844	1.79093	0.324766	25	2	Apoe,Lrp1	artery morphogenesis	0.63474
GO:0042493	1.58797	0.330392	56	4	Fos,Npc1,Adam17,Bcl2	response to drug	0.643072
GO:0045765	1.58797	0.330392	56	4	Pf4,Ctsh,Ccl2,C3ar1	regulation of angiogenesis	0.643072
GO:0008366	1.55772	0.337579	57	4	Pmp22,Hexa,Nab2,Myo5a	axon ensheathment	0.651255
GO:0010463	1.716	0.342034	26	2	Tgfbr2,Fbxw4	mesenchymal cell proliferation	0.651255
GO:0045766	1.716	0.342034	26	2	Ctsh,C3ar1	positive regulation of angiogenesis	0.651255
GO:0007568	1.52859	0.344988	58	4	Ctsl,Serp1,Bcl2,Ifi27l2a	aging	0.651255
GO:0035265	1.52859	0.344988	58	4	Rxra,Dusp6,Serp1,Bcl2	organ growth	0.651255
GO:0001933	1.44893	0.347121	107	7	Dusp3,Dusp6,Dnajc10,Spred1,Inpp5j,Dusp7,Fabp4	negative regulation of protein phosphorylation	0.651255
GO:0046856	2.57133	0.348435	9	1	Mtm1	phosphatidylinositol dephosphorylation	0.651255
GO:0045216	1.50052	0.352602	59	4	Rhoa,Ptpro,Bcl2,Zfp703	cell-cell junction organization	0.651255
GO:0000018	1.64706	0.359161	27	2	Zranb3,Tnfsf13	regulation of DNA recombination	0.651255
GO:0001569	1.64706	0.359161	27	2	Nrp1,Tgfbr2	patterning of blood vessels	0.651255
GO:0021885	1.64706	0.359161	27	2	Axl,Ndel1	forebrain cell migration	0.651255
GO:0045669	1.64706	0.359161	27	2	Fam20c,Cebpa	positive regulation of osteoblast differentiation	0.651255
GO:0071407	1.47346	0.360404	60	4	Ccl3,Npc1,Cebpa,Naip2	cellular response to organic cyclic compound	0.651255
GO:0046661	1.44734	0.368379	61	4	Sgpl1,Ctsl,Hsd17b4,Bcl2	male sex differentiation	0.651255
GO:0002286	1.58343	0.376123	28	2	Slc11a1,Il4ra	T cell activation involved in immune response	0.651255
GO:0006029	1.58343	0.376123	28	2	Igf1,Cant1	proteoglycan metabolic process	0.651255
GO:0006200	1.58343	0.376123	28	2	Dnajc10,Kif1b	ATP catabolic process	0.651255
GO:0010171	1.58343	0.376123	28	2	Sgpl1,Asph	body morphogenesis	0.651255
GO:0010632	1.58343	0.376123	28	2	Ctsh,Tgfbr2	regulation of epithelial cell migration	0.651255
GO:0016052	1.58343	0.376123	28	2	Akr1a1,Pgm2l1	carbohydrate catabolic process	0.651255
GO:0030203	1.58343	0.376123	28	2	Igf1,Hexa	glycosaminoglycan metabolic process	0.651255
GO:0030500	1.58343	0.376123	28	2	Fam20c,Creb3l1	regulation of bone mineralization	0.651255
GO:0030518	1.58343	0.376123	28	2	Rhoa,Igf1	intracellular steroid hormone receptor signaling pathway	0.651255
GO:0031532	1.58343	0.376123	28	2	Csf1r,Rap2a	actin cytoskeleton reorganization	0.651255
GO:0032835	1.58343	0.376123	28	2	Ptpro,Bcl2	glomerulus development	0.651255
GO:0042733	1.58343	0.376123	28	2	Gna12,Fbxw4	embryonic digit morphogenesis	0.651255
GO:0090316	1.58343	0.376123	28	2	Prkaca,Camk1	positive regulation of intracellular protein transport	0.651255
GO:0090317	1.58343	0.376123	28	2	Cd36,Litaf	negative regulation of intracellular protein transport	0.651255
GO:0000768	2.28546	0.378749	10	1	Adam8	syncytium formation by plasma membrane fusion	0.651255
GO:0006695	2.28546	0.378749	10	1	Abcg1	cholesterol biosynthetic process	0.651255
GO:0006882	2.28546	0.378749	10	1	Slc30a7	cellular zinc ion homeostasis	0.651255
GO:0007176	2.28546	0.378749	10	1	App	regulation of epidermal growth factor-activated receptor activity	0.651255
GO:0009124	2.28546	0.378749	10	1	Pid1	nucleoside monophosphate biosynthetic process	0.651255
GO:0010907	2.28546	0.378749	10	1	Igf1	positive regulation of glucose metabolic process	0.651255
GO:0018279	2.28546	0.378749	10	1	Tusc3	protein N-linked glycosylation via asparagine	0.651255
GO:0031103	2.28546	0.378749	10	1	Bcl2	axon regeneration	0.651255
GO:0032731	2.28546	0.378749	10	1	Ccl3	positive regulation of interleukin-1 beta production	0.651255
GO:0032873	2.28546	0.378749	10	1	Dusp3	negative regulation of stress-activated MAPK cascade	0.651255
GO:0035909	2.28546	0.378749	10	1	Lrp1	aorta morphogenesis	0.651255
GO:0042104	2.28546	0.378749	10	1	Il18	positive regulation of activated T cell proliferation	0.651255
GO:0042119	2.28546	0.378749	10	1	Fcer1g	neutrophil activation	0.651255
GO:0042417	2.28546	0.378749	10	1	Comt	dopamine metabolic process	0.651255
GO:0042832	2.28546	0.378749	10	1	Slc11a1	defense response to protozoan	0.651255
GO:0043030	2.28546	0.378749	10	1	Il4ra	regulation of macrophage activation	0.651255
GO:0045579	2.28546	0.378749	10	1	Il2rg	positive regulation of B cell differentiation	0.651255
GO:0045671	2.28546	0.378749	10	1	Ccl3	negative regulation of osteoclast differentiation	0.651255
GO:0045730	2.28546	0.378749	10	1	Slc11a1	respiratory burst	0.651255
GO:0045762	2.28546	0.378749	10	1	Adcy7	positive regulation of adenylate cyclase activity	0.651255
GO:0046636	2.28546	0.378749	10	1	Il4ra	negative regulation of alpha-beta T cell activation	0.651255
GO:0046839	2.28546	0.378749	10	1	Mtm1	phospholipid dephosphorylation	0.651255
GO:0046902	2.28546	0.378749	10	1	Bcl2	regulation of mitochondrial membrane permeability	0.651255
GO:0048485	2.28546	0.378749	10	1	Nrp1	sympathetic nervous system development	0.651255
GO:0048661	2.28546	0.378749	10	1	Aif1	positive regulation of smooth muscle cell proliferation	0.651255
GO:0050860	2.28546	0.378749	10	1	Dusp3	negative regulation of T cell receptor signaling pathway	0.651255
GO:0050884	2.28546	0.378749	10	1	Hexa	neuromuscular process controlling posture	0.651255
GO:0051443	2.28546	0.378749	10	1	Trib1	positive regulation of ubiquitin-protein ligase activity	0.651255
GO:0051642	2.28546	0.378749	10	1	Ndel1	centrosome localization	0.651255
GO:0060117	2.28546	0.378749	10	1	Myo7a	auditory receptor cell development	0.651255
GO:0060389	2.28546	0.378749	10	1	Dab2	pathway-restricted SMAD protein phosphorylation	0.651255
GO:0060479	2.28546	0.378749	10	1	Igf1	lung cell differentiation	0.651255
GO:0061298	2.28546	0.378749	10	1	Acvrl1	retina vasculature development in camera-type eye	0.651255
GO:0070242	2.28546	0.378749	10	1	Adam8	thymocyte apoptotic process	0.651255
GO:0071158	2.28546	0.378749	10	1	Prkaca	positive regulation of cell cycle arrest	0.651255
GO:0071347	2.28546	0.378749	10	1	Ccl2	cellular response to interleukin-1	0.651255
GO:0070661	1.41632	0.383878	125	8	Itgb2,Aif1,Slc11a1,Itgam,Tlr4,Il18,Gpr183,Bcl2	leukocyte proliferation	0.655585
GO:0009615	1.51926	0.390267	73	5	Dhx58,Ifnar1,Itgax,Tlr13,Ifi27l2a	response to virus	0.655585
GO:0006672	1.5245	0.392898	29	2	Hexa,Pla2g15	ceramide metabolic process	0.655585
GO:0006984	1.5245	0.392898	29	2	Serp1,Ccnd1	ER-nucleus signaling pathway	0.655585
GO:0010469	1.5245	0.392898	29	2	App,Myo5a	regulation of receptor activity	0.655585
GO:0018107	1.5245	0.392898	29	2	Spred1,Bcl2	peptidyl-threonine phosphorylation	0.655585
GO:0001101	1.49696	0.394019	74	5	Lgmn,Ctsh,Pid1,Bcl2,Lamtor3	response to acid	0.655585
GO:0043406	1.49696	0.394019	74	5	Dab2,Fgd4,Adam8,Trf,Tlr4	positive regulation of MAP kinase activity	0.655585
GO:0045637	1.49696	0.394019	74	5	Ccl3,Pf4,Lmo2,Mitf,Rab7b	regulation of myeloid cell differentiation	0.655585
GO:0042391	1.32369	0.403405	133	8	Pmp22,Hexa,Nab2,P2rx4,Myo5a,Shtn1,Pid1,Bcl2	regulation of membrane potential	0.655585
GO:0001711	2.05656	0.407657	11	1	Dusp6	endodermal cell fate commitment	0.655585
GO:0002455	2.05656	0.407657	11	1	C1qa	humoral immune response mediated by circulating immunoglobulin	0.655585
GO:0005978	2.05656	0.407657	11	1	Igf1	glycogen biosynthetic process	0.655585
GO:0006506	2.05656	0.407657	11	1	Pgap2	GPI anchor biosynthetic process	0.655585
GO:0006821	2.05656	0.407657	11	1	P2ry6	chloride transport	0.655585
GO:0006949	2.05656	0.407657	11	1	Adam8	syncytium formation	0.655585
GO:0007019	2.05656	0.407657	11	1	Mid1ip1	microtubule depolymerization	0.655585
GO:0010828	2.05656	0.407657	11	1	Igf1	positive regulation of glucose transport	0.655585
GO:0015909	2.05656	0.407657	11	1	Plin2	long-chain fatty acid transport	0.655585
GO:0019430	2.05656	0.407657	11	1	Cd36	removal of superoxide radicals	0.655585
GO:0021602	2.05656	0.407657	11	1	Nrp1	cranial nerve morphogenesis	0.655585
GO:0021799	2.05656	0.407657	11	1	Ndel1	cerebral cortex radially oriented cell migration	0.655585
GO:0021884	2.05656	0.407657	11	1	Atg7	forebrain neuron development	0.655585
GO:0022406	2.05656	0.407657	11	1	Plek	membrane docking	0.655585
GO:0022408	2.05656	0.407657	11	1	Zfp703	negative regulation of cell-cell adhesion	0.655585
GO:0032689	2.05656	0.407657	11	1	Tlr4	negative regulation of interferon-gamma production	0.655585
GO:0042304	2.05656	0.407657	11	1	Mid1ip1	regulation of fatty acid biosynthetic process	0.655585
GO:0043516	2.05656	0.407657	11	1	Spred1	regulation of DNA damage response, signal transduction by p53 class mediator	0.655585
GO:0045429	2.05656	0.407657	11	1	Tlr4	positive regulation of nitric oxide biosynthetic process	0.655585
GO:0045843	2.05656	0.407657	11	1	Sirt2	negative regulation of striated muscle tissue development	0.655585
GO:0045910	2.05656	0.407657	11	1	Zranb3	negative regulation of DNA recombination	0.655585
GO:0048820	2.05656	0.407657	11	1	Myo5a	hair follicle maturation	0.655585
GO:0050702	2.05656	0.407657	11	1	Ccl3	interleukin-1 beta secretion	0.655585
GO:0051492	2.05656	0.407657	11	1	Rhoa	regulation of stress fiber assembly	0.655585
GO:0055069	2.05656	0.407657	11	1	Slc30a7	zinc ion homeostasis	0.655585
GO:0060122	2.05656	0.407657	11	1	Myo7a	inner ear receptor stereocilium organization	0.655585
GO:0060438	2.05656	0.407657	11	1	Tgfbr2	trachea development	0.655585
GO:0060742	2.05656	0.407657	11	1	Rxra	epithelial cell differentiation involved in prostate gland development	0.655585
GO:0001649	1.37568	0.421319	80	5	Ccl3,Igf1,Fam20c,Clec5a,Cebpa	osteoblast differentiation	0.657119
GO:0006469	1.37568	0.421319	80	5	Dusp3,Dusp6,Spred1,Dusp7,Fabp4	negative regulation of protein kinase activity	0.657119
GO:0022604	1.35084	0.422161	147	9	Gna12,Ccl3,Strip1,Dab2,Csf1r,Nrp1,Plxnb2,Rap2a,Zfp703	regulation of cell morphogenesis	0.657119
GO:0030162	1.3118	0.42932	151	9	Adam8,Serpinb8,Adam9,Ctsh,Trib1,Hip1,Serpinb6a,Serpinb2,Serpinb10	regulation of proteolysis	0.657119
GO:0030258	1.67202	0.431971	40	3	Apoe,Abcg1,Mtm1	lipid modification	0.657119
GO:0060021	1.67202	0.431971	40	3	Sgpl1,Asph,Tgfbr2	palate development	0.657119
GO:0006874	1.33946	0.431983	82	5	Ccl3,Apoe,App,Ptger3,Bcl2	cellular calcium ion homeostasis	0.657119
GO:0007249	1.33946	0.431983	82	5	Cd36,Rhoa,Litaf,Clec4n,Tlr4	I-kappaB kinase/NF-kappaB cascade	0.657119
GO:0022612	1.33946	0.431983	82	5	Rxra,Igf1,Nrp1,Tgfbr2,Bcl2	gland morphogenesis	0.657119
GO:0000303	1.86938	0.435225	12	1	Cd36	response to superoxide	0.657119
GO:0001833	1.86938	0.435225	12	1	Ndel1	inner cell mass cell proliferation	0.657119
GO:0001881	1.86938	0.435225	12	1	Dab2	receptor recycling	0.657119
GO:0002076	1.86938	0.435225	12	1	Clec5a	osteoblast development	0.657119
GO:0002320	1.86938	0.435225	12	1	Bcl2	lymphoid progenitor cell differentiation	0.657119
GO:0007340	1.86938	0.435225	12	1	Gnpda1	acrosome reaction	0.657119
GO:0009303	1.86938	0.435225	12	1	Rnasek	rRNA transcription	0.657119
GO:0010977	1.86938	0.435225	12	1	Inpp5j	negative regulation of neuron projection development	0.657119
GO:0015813	1.86938	0.435225	12	1	Slc38a7	L-glutamate transport	0.657119
GO:0016126	1.86938	0.435225	12	1	Abcg1	sterol biosynthetic process	0.657119
GO:0031102	1.86938	0.435225	12	1	Bcl2	neuron projection regeneration	0.657119
GO:0035987	1.86938	0.435225	12	1	Dusp6	endodermal cell differentiation	0.657119
GO:0042345	1.86938	0.435225	12	1	Litaf	regulation of NF-kappaB import into nucleus	0.657119
GO:0042743	1.86938	0.435225	12	1	Cybb	hydrogen peroxide metabolic process	0.657119
GO:0043297	1.86938	0.435225	12	1	Rhoa	apical junction assembly	0.657119
GO:0045063	1.86938	0.435225	12	1	Il4ra	T-helper 1 cell differentiation	0.657119
GO:0046470	1.86938	0.435225	12	1	Fabp5	phosphatidylcholine metabolic process	0.657119
GO:0048070	1.86938	0.435225	12	1	Bcl2	regulation of developmental pigmentation	0.657119
GO:0048384	1.86938	0.435225	12	1	Rxra	retinoic acid receptor signaling pathway	0.657119
GO:0048857	1.86938	0.435225	12	1	Bcl2	neural nucleus development	0.657119
GO:0050850	1.86938	0.435225	12	1	Ccl3	positive regulation of calcium-mediated signaling	0.657119
GO:0060841	1.86938	0.435225	12	1	Acvrl1	venous blood vessel development	0.657119
GO:0070527	1.86938	0.435225	12	1	Plek	platelet aggregation	0.657119
GO:0071156	1.86938	0.435225	12	1	Prkaca	regulation of cell cycle arrest	0.657119
GO:0071277	1.86938	0.435225	12	1	Fos	cellular response to calcium ion	0.657119
GO:0071805	1.86938	0.435225	12	1	Kcnn4	potassium ion transmembrane transport	0.657119
GO:2000134	1.86938	0.435225	12	1	Ccnd1	negative regulation of G1/S transition of mitotic cell cycle	0.657119
GO:2001257	1.86938	0.435225	12	1	Myo5a	regulation of cation channel activity	0.657119
GO:0033673	1.32204	0.437561	83	5	Dusp3,Dusp6,Spred1,Dusp7,Fabp4	negative regulation of kinase activity	0.657119
GO:0002244	1.62772	0.437906	41	3	Pf4,Rab7b,Bcl2	hematopoietic progenitor cell differentiation	0.657119
GO:0009267	1.62772	0.437906	41	3	Ctsd,Ctsl,Npc1	cellular response to starvation	0.657119
GO:0030856	1.62772	0.437906	41	3	Acvrl1,Bcl2,Ccnd1	regulation of epithelial cell differentiation	0.657119
GO:0042698	1.62772	0.437906	41	3	Axl,Sgpl1,Bcl2	ovulation cycle	0.657119
GO:0030282	1.58569	0.444199	42	3	Fam20c,Creb3l1,Mmp13	bone mineralization	0.657119
GO:0046474	1.58569	0.444199	42	3	Fabp5,Pgap2,Lpcat2	glycerophospholipid biosynthetic process	0.657119
GO:0052547	1.42544	0.448552	93	6	Serpinb8,Ctsh,Hip1,Serpinb6a,Serpinb2,Serpinb10	regulation of peptidase activity	0.657119
GO:0032388	1.54576	0.450819	43	3	Prkaca,Camk1,Fcer1g	positive regulation of intracellular transport	0.657119
GO:0042100	1.54576	0.450819	43	3	Tlr4,Gpr183,Bcl2	B cell proliferation	0.657119
GO:0050868	1.54576	0.450819	43	3	Dusp3,Il4ra,Socs6	negative regulation of T cell activation	0.657119
GO:0006887	1.39289	0.453402	95	6	Ccl3,Plek,Myo5a,Cd300a,Gnpda1,Fcer1g	exocytosis	0.657119
GO:0045926	1.39289	0.453402	95	6	Cd36,Lgmn,Nrp1,Zmat3,Sertad2,Bcl2	negative regulation of growth	0.657119
GO:0001655	1.30264	0.453942	169	10	Rxra,Ahr,Igf1,Sgpl1,Anxa4,Ptpro,Ctsh,Gcnt1,Aph1c,Bcl2	urogenital system development	0.657119
GO:0019725	1.30264	0.453942	169	10	Ccl3,Apoe,App,Atp6v0c,Slc11a1,Mtm1,Ptger3,Kcnn4,Slc30a7,Bcl2	cellular homeostasis	0.657119
GO:0007204	1.50779	0.457735	44	3	Ccl3,Ptger3,Bcl2	elevation of cytosolic calcium ion concentration	0.657119
GO:0051607	1.50779	0.457735	44	3	Dhx58,Ifnar1,Itgax	defense response to virus	0.657119
GO:0000305	1.71325	0.461515	13	1	Cd36	response to oxygen radical	0.657119
GO:0001562	1.71325	0.461515	13	1	Slc11a1	response to protozoan	0.657119
GO:0006024	1.71325	0.461515	13	1	Igf1	glycosaminoglycan biosynthetic process	0.657119
GO:0006352	1.71325	0.461515	13	1	Ahr	DNA-dependent transcription, initiation	0.657119
GO:0006505	1.71325	0.461515	13	1	Pgap2	GPI anchor metabolic process	0.657119
GO:0006584	1.71325	0.461515	13	1	Comt	catecholamine metabolic process	0.657119
GO:0006826	1.71325	0.461515	13	1	Trf	iron ion transport	0.657119
GO:0006998	1.71325	0.461515	13	1	Ndel1	nuclear envelope organization	0.657119
GO:0009712	1.71325	0.461515	13	1	Comt	catechol-containing compound metabolic process	0.657119
GO:0010761	1.71325	0.461515	13	1	Sgpl1	fibroblast migration	0.657119
GO:0030501	1.71325	0.461515	13	1	Fam20c	positive regulation of bone mineralization	0.657119
GO:0030819	1.71325	0.461515	13	1	Adcy7	positive regulation of cAMP biosynthetic process	0.657119
GO:0030947	1.71325	0.461515	13	1	Myof	regulation of vascular endothelial growth factor receptor signaling pathway	0.657119
GO:0031111	1.71325	0.461515	13	1	Mid1ip1	negative regulation of microtubule polymerization or depolymerization	0.657119
GO:0032288	1.71325	0.461515	13	1	Pmp22	myelin assembly	0.657119
GO:0032392	1.71325	0.461515	13	1	Zranb3	DNA geometric change	0.657119
GO:0042531	1.71325	0.461515	13	1	Csf1r	positive regulation of tyrosine phosphorylation of STAT protein	0.657119
GO:0045581	1.71325	0.461515	13	1	Il4ra	negative regulation of T cell differentiation	0.657119
GO:0045761	1.71325	0.461515	13	1	Adcy7	regulation of adenylate cyclase activity	0.657119
GO:0051702	1.71325	0.461515	13	1	Ccl3	interaction with symbiont	0.657119
GO:0055012	1.71325	0.461515	13	1	Rxra	ventricular cardiac muscle cell differentiation	0.657119
GO:0070306	1.71325	0.461515	13	1	Maf	lens fiber cell differentiation	0.657119
GO:0006518	1.47162	0.46492	45	3	Idh1,Tpp1,Ctsh	peptide metabolic process	0.660718
GO:0035264	1.33199	0.465442	99	6	Igf1,Sgpl1,Gamt,Lgmn,App,Bcl2	multicellular organism growth	0.660718
GO:0005975	1.23074	0.470456	178	10	Man2b1,Igf1,Gusb,Atf3,Fabp5,Serp1,Akr1a1,Pgm2l1,Tusc3,Gnpda1	carbohydrate metabolic process	0.663561
GO:0006914	1.43714	0.472348	46	3	Ctsd,Npc1,Atg7	autophagy	0.663561
GO:0042035	1.43714	0.472348	46	3	Tlr4,Tlr1,Fcgr3	regulation of cytokine biosynthetic process	0.663561
GO:0008654	1.40422	0.479993	47	3	Fabp5,Pgap2,Lpcat2	phospholipid biosynthetic process	0.663561
GO:0030073	1.40422	0.479993	47	3	Il1rn,Serp1,Myo5a	insulin secretion	0.663561
GO:0051480	1.40422	0.479993	47	3	Ccl3,Ptger3,Bcl2	cytosolic calcium ion homeostasis	0.663561
GO:0032870	1.2761	0.48023	103	6	Prkaca,Npc1,Ptpra,Myo5a,Pid1,Naip2	cellular response to hormone stimulus	0.663561
GO:0061448	1.2761	0.48023	103	6	Igf1,Tgfbr2,Sh3pxd2b,Fbxw4,Mmp13,Maf	connective tissue development	0.663561
GO:0030324	1.26285	0.484304	104	6	Igf1,Lipa,Pdpn,Ctsh,Tgfbr2,Cebpa	lung development	0.663561
GO:0000060	1.58118	0.486585	14	1	Slc11a1	protein import into nucleus, translocation	0.663561
GO:0001676	1.58118	0.486585	14	1	Myo5a	long-chain fatty acid metabolic process	0.663561
GO:0006368	1.58118	0.486585	14	1	Dab2	transcription elongation from RNA polymerase II promoter	0.663561
GO:0006636	1.58118	0.486585	14	1	Fam213b	unsaturated fatty acid biosynthetic process	0.663561
GO:0006687	1.58118	0.486585	14	1	Hexa	glycosphingolipid metabolic process	0.663561
GO:0006766	1.58118	0.486585	14	1	Akr1a1	vitamin metabolic process	0.663561
GO:0009247	1.58118	0.486585	14	1	Pgap2	glycolipid biosynthetic process	0.663561
GO:0010453	1.58118	0.486585	14	1	Dusp6	regulation of cell fate commitment	0.663561
GO:0030513	1.58118	0.486585	14	1	Acvrl1	positive regulation of BMP signaling pathway	0.663561
GO:0040015	1.58118	0.486585	14	1	Lgmn	negative regulation of multicellular organism growth	0.663561
GO:0042058	1.58118	0.486585	14	1	App	regulation of epidermal growth factor receptor signaling pathway	0.663561
GO:0046456	1.58118	0.486585	14	1	Fam213b	icosanoid biosynthetic process	0.663561
GO:0048535	1.58118	0.486585	14	1	Tnfrsf11a	lymph node development	0.663561
GO:0050701	1.58118	0.486585	14	1	Ccl3	interleukin-1 secretion	0.663561
GO:0050810	1.58118	0.486585	14	1	Abcg1	regulation of steroid biosynthetic process	0.663561
GO:0060977	1.58118	0.486585	14	1	Rxra	coronary vasculature morphogenesis	0.663561
GO:0070232	1.58118	0.486585	14	1	Adam8	regulation of T cell apoptotic process	0.663561
GO:0009636	1.37277	0.48783	48	3	Ccl3,Jak1,Bcl2	response to toxin	0.663561
GO:0010810	1.37277	0.48783	48	3	Dab2,Spp1,Bcl2	regulation of cell-substrate adhesion	0.663561
GO:0031214	1.37277	0.48783	48	3	Fam20c,Creb3l1,Mmp13	biomineral tissue development	0.663561
GO:0007169	1.20995	0.49341	199	11	Dusp6,Igf1,Sgpl1,Dok2,App,Csf1r,Nrp1,Fam20c,Ptpra,Lrp1,Myof	transmembrane receptor protein tyrosine kinase signaling pathway	0.670185
GO:0001508	1.34269	0.495836	49	3	Hexa,Nab2,Myo5a	regulation of action potential	0.671549
GO:0030705	1.34269	0.495836	49	3	Ndel1,App,Kif1b	cytoskeleton-dependent intracellular transport	0.671549
GO:0007565	1.31388	0.503991	50	3	Rxra,Ctsl,Grn	female pregnancy	0.673052
GO:0046034	1.31388	0.503991	50	3	Dnajc10,Pid1,Kif1b	ATP metabolic process	0.673052
GO:0001938	1.46799	0.510493	15	1	Acvrl1	positive regulation of endothelial cell proliferation	0.673052
GO:0006094	1.46799	0.510493	15	1	Atf3	gluconeogenesis	0.673052
GO:0010522	1.46799	0.510493	15	1	Bcl2	regulation of calcium ion transport into cytosol	0.673052
GO:0015992	1.46799	0.510493	15	1	Atp6v1e1	proton transport	0.673052
GO:0016601	1.46799	0.510493	15	1	Aif1	Rac protein signal transduction	0.673052
GO:0031069	1.46799	0.510493	15	1	Bcl2	hair follicle morphogenesis	0.673052
GO:0032963	1.46799	0.510493	15	1	Mmp13	collagen metabolic process	0.673052
GO:0035335	1.46799	0.510493	15	1	Ptpro	peptidyl-tyrosine dephosphorylation	0.673052
GO:0044070	1.46799	0.510493	15	1	Tnfrsf11a	regulation of anion transport	0.673052
GO:0044130	1.46799	0.510493	15	1	Cd36	negative regulation of growth of symbiont in host	0.673052
GO:0044146	1.46799	0.510493	15	1	Cd36	negative regulation of growth of symbiont involved in interaction with host	0.673052
GO:0045061	1.46799	0.510493	15	1	H2-DMa	thymic T cell selection	0.673052
GO:0046164	1.46799	0.510493	15	1	Apoe	alcohol catabolic process	0.673052
GO:0048660	1.46799	0.510493	15	1	Aif1	regulation of smooth muscle cell proliferation	0.673052
GO:0048678	1.46799	0.510493	15	1	Bcl2	response to axon injury	0.673052
GO:0060428	1.46799	0.510493	15	1	Igf1	lung epithelium development	0.673052
GO:0090311	1.46799	0.510493	15	1	Spred1	regulation of protein deacetylation	0.673052
GO:0016042	1.28627	0.512272	51	3	Apoe,Lpl,Hexa	lipid catabolic process	0.674456
GO:0000271	1.3699	0.533291	16	1	Igf1	polysaccharide biosynthetic process	0.680454
GO:0002762	1.3699	0.533291	16	1	Ccl3	negative regulation of myeloid leukocyte differentiation	0.680454
GO:0002828	1.3699	0.533291	16	1	Il4ra	regulation of type 2 immune response	0.680454
GO:0006378	1.3699	0.533291	16	1	App	mRNA polyadenylation	0.680454
GO:0009593	1.3699	0.533291	16	1	Tlr4	detection of chemical stimulus	0.680454
GO:0021680	1.3699	0.533291	16	1	Atg7	cerebellar Purkinje cell layer development	0.680454
GO:0030279	1.3699	0.533291	16	1	Bcl2	negative regulation of ossification	0.680454
GO:0032784	1.3699	0.533291	16	1	Dab2	regulation of DNA-dependent transcription, elongation	0.680454
GO:0043149	1.3699	0.533291	16	1	Rhoa	stress fiber assembly	0.680454
GO:0044259	1.3699	0.533291	16	1	Mmp13	multicellular organismal macromolecule metabolic process	0.680454
GO:0048009	1.3699	0.533291	16	1	Igf1	insulin-like growth factor receptor signaling pathway	0.680454
GO:0048659	1.3699	0.533291	16	1	Aif1	smooth muscle cell proliferation	0.680454
GO:0050848	1.3699	0.533291	16	1	Ccl3	regulation of calcium-mediated signaling	0.680454
GO:0051329	1.3699	0.533291	16	1	App	interphase of mitotic cell cycle	0.680454
GO:0051438	1.3699	0.533291	16	1	Trib1	regulation of ubiquitin-protein ligase activity	0.680454
GO:0060441	1.3699	0.533291	16	1	Ctsh	epithelial tube branching involved in lung morphogenesis	0.680454
GO:0071453	1.3699	0.533291	16	1	Adam8	cellular response to oxygen levels	0.680454
GO:0071456	1.3699	0.533291	16	1	Adam8	cellular response to hypoxia	0.680454
GO:2000108	1.3699	0.533291	16	1	Adam8	positive regulation of leukocyte apoptotic process	0.680454
GO:0019228	1.39776	0.537288	63	4	Pmp22,Hexa,Nab2,Myo5a	regulation of action potential in neuron	0.680454
GO:0046822	1.39776	0.537288	63	4	Cd36,Prkaca,Litaf,Camk1	regulation of nucleocytoplasmic transport	0.680454
GO:0071363	1.24218	0.539955	141	8	Acvrl1,Dusp6,Dab2,Fam20c,Adam9,Myof,Adam17,Zfp703	cellular response to growth factor stimulus	0.680454
GO:0007179	1.37422	0.540863	64	4	Acvrl1,Adam9,Adam17,Zfp703	transforming growth factor beta receptor signaling pathway	0.680454
GO:0016311	1.21409	0.546302	144	8	Dusp3,Dusp6,Spred1,Nceh1,Ptpro,Mtm1,Dusp7,Bcl2	dephosphorylation	0.680454
GO:0070848	1.21409	0.546302	144	8	Acvrl1,Dusp6,Dab2,Fam20c,Adam9,Myof,Adam17,Zfp703	response to growth factor stimulus	0.680454
GO:0055082	1.19604	0.551105	146	8	Ccl3,Apoe,App,Atp6v0c,Slc11a1,Ptger3,Slc30a7,Bcl2	cellular chemical homeostasis	0.680454
GO:0000045	1.28407	0.555031	17	1	Ctsd	autophagic vacuole assembly	0.680454
GO:0000096	1.28407	0.555031	17	1	Pcyox1	sulfur amino acid metabolic process	0.680454
GO:0001706	1.28407	0.555031	17	1	Dusp6	endoderm formation	0.680454
GO:0006171	1.28407	0.555031	17	1	Adcy7	cAMP biosynthetic process	0.680454
GO:0014037	1.28407	0.555031	17	1	Nab2	Schwann cell differentiation	0.680454
GO:0019217	1.28407	0.555031	17	1	Mid1ip1	regulation of fatty acid metabolic process	0.680454
GO:0030148	1.28407	0.555031	17	1	Elovl1	sphingolipid biosynthetic process	0.680454
GO:0032024	1.28407	0.555031	17	1	Serp1	positive regulation of insulin secretion	0.680454
GO:0033138	1.28407	0.555031	17	1	Bcl2	positive regulation of peptidyl-serine phosphorylation	0.680454
GO:0043627	1.28407	0.555031	17	1	Naip2	response to estrogen stimulus	0.680454
GO:0044117	1.28407	0.555031	17	1	Cd36	growth of symbiont in host	0.680454
GO:0045069	1.28407	0.555031	17	1	Bcl2	regulation of viral genome replication	0.680454
GO:0045428	1.28407	0.555031	17	1	Tlr4	regulation of nitric oxide biosynthetic process	0.680454
GO:0045778	1.28407	0.555031	17	1	Fam20c	positive regulation of ossification	0.680454
GO:0045921	1.28407	0.555031	17	1	Fcer1g	positive regulation of exocytosis	0.680454
GO:0046427	1.28407	0.555031	17	1	Csf1r	positive regulation of JAK-STAT cascade	0.680454
GO:0046677	1.28407	0.555031	17	1	Jak1	response to antibiotic	0.680454
GO:0048041	1.28407	0.555031	17	1	Bcl2	focal adhesion assembly	0.680454
GO:0048525	1.28407	0.555031	17	1	Ccl3	negative regulation of viral reproduction	0.680454
GO:0048599	1.28407	0.555031	17	1	Bcl2	oocyte development	0.680454
GO:0048742	1.28407	0.555031	17	1	Bcl2	regulation of skeletal muscle fiber development	0.680454
GO:0050688	1.28407	0.555031	17	1	Dhx58	regulation of defense response to virus	0.680454
GO:0060420	1.28407	0.555031	17	1	Dusp6	regulation of heart growth	0.680454
GO:0060612	1.28407	0.555031	17	1	Sh3pxd2b	adipose tissue development	0.680454
GO:0060998	1.28407	0.555031	17	1	Camk1	regulation of dendritic spine development	0.680454
GO:0090277	1.28407	0.555031	17	1	Serp1	positive regulation of peptide hormone secretion	0.680454
GO:2000179	1.28407	0.555031	17	1	Igf1	positive regulation of neural precursor cell proliferation	0.680454
GO:0050730	1.26734	0.561942	69	4	Cd36,App,Csf1r,Rap2b	regulation of peptidyl-tyrosine phosphorylation	0.688033
GO:0000079	1.20833	0.575763	18	1	Ccnd1	regulation of cyclin-dependent protein kinase activity	0.688872
GO:0001832	1.20833	0.575763	18	1	Ndel1	blastocyst growth	0.688872
GO:0001958	1.20833	0.575763	18	1	Nab2	endochondral ossification	0.688872
GO:0006308	1.20833	0.575763	18	1	Dnase2a	DNA catabolic process	0.688872
GO:0007052	1.20833	0.575763	18	1	Cltc	mitotic spindle organization	0.688872
GO:0009994	1.20833	0.575763	18	1	Bcl2	oocyte differentiation	0.688872
GO:0010506	1.20833	0.575763	18	1	Npc1	regulation of autophagy	0.688872
GO:0019079	1.20833	0.575763	18	1	Bcl2	viral genome replication	0.688872
GO:0040018	1.20833	0.575763	18	1	Bcl2	positive regulation of multicellular organism growth	0.688872
GO:0042092	1.20833	0.575763	18	1	Il4ra	type 2 immune response	0.688872
GO:0043631	1.20833	0.575763	18	1	App	RNA polyadenylation	0.688872
GO:0045727	1.20833	0.575763	18	1	Serp1	positive regulation of translation	0.688872
GO:0050856	1.20833	0.575763	18	1	Dusp3	regulation of T cell receptor signaling pathway	0.688872
GO:0051149	1.20833	0.575763	18	1	Bcl2	positive regulation of muscle cell differentiation	0.688872
GO:0055013	1.20833	0.575763	18	1	Atg7	cardiac muscle cell development	0.688872
GO:0060968	1.20833	0.575763	18	1	Apobec1	regulation of gene silencing	0.688872
GO:0060993	1.20833	0.575763	18	1	Gcnt1	kidney morphogenesis	0.688872
GO:0061005	1.20833	0.575763	18	1	Ptpro	cell differentiation involved in kidney development	0.688872
GO:0010720	1.21076	0.576692	72	4	Dab2,Plxnb2,Bcl2,Zfp703	positive regulation of cell development	0.68911
GO:0045664	1.16023	0.580215	169	9	Rhoa,Ndel1,App,Nrp1,Camk1,Inpp5j,Plxnb2,Rap2a,Bcl2	regulation of neuron differentiation	0.692444
GO:0016358	1.19299	0.581886	73	4	App,Nrp1,Camk1,Rap2a	dendrite development	0.693561
GO:0001913	1.141	0.595532	19	1	Ctsh	T cell mediated cytotoxicity	0.694052
GO:0001952	1.141	0.595532	19	1	Bcl2	regulation of cell-matrix adhesion	0.694052
GO:0001959	1.141	0.595532	19	1	Irf7	regulation of cytokine-mediated signaling pathway	0.694052
GO:0006487	1.141	0.595532	19	1	Tusc3	protein N-linked glycosylation	0.694052
GO:0007159	1.141	0.595532	19	1	Itgam	leukocyte cell-cell adhesion	0.694052
GO:0007200	1.141	0.595532	19	1	Ptger3	phospholipase C-activating G-protein coupled receptor signaling pathway	0.694052
GO:0007260	1.141	0.595532	19	1	Csf1r	tyrosine phosphorylation of STAT protein	0.694052
GO:0021795	1.141	0.595532	19	1	Ndel1	cerebral cortex cell migration	0.694052
GO:0030516	1.141	0.595532	19	1	Nrp1	regulation of axon extension	0.694052
GO:0030814	1.141	0.595532	19	1	Adcy7	regulation of cAMP metabolic process	0.694052
GO:0032330	1.141	0.595532	19	1	Maf	regulation of chondrocyte differentiation	0.694052
GO:0032436	1.141	0.595532	19	1	Trib1	positive regulation of proteasomal ubiquitin-dependent protein catabolic process	0.694052
GO:0032633	1.141	0.595532	19	1	Cd83	interleukin-4 production	0.694052
GO:0043244	1.141	0.595532	19	1	Mid1ip1	regulation of protein complex disassembly	0.694052
GO:0050771	1.141	0.595532	19	1	Nrp1	negative regulation of axonogenesis	0.694052
GO:0051865	1.141	0.595532	19	1	Rnf13	protein autoubiquitination	0.694052
GO:0060119	1.141	0.595532	19	1	Myo7a	inner ear receptor cell development	0.694052
GO:0060976	1.141	0.595532	19	1	Rxra	coronary vasculature development	0.694052
GO:0051348	1.27236	0.599689	86	5	Dusp3,Dusp6,Spred1,Dusp7,Fabp4	negative regulation of transferase activity	0.697176
GO:0055074	1.27236	0.599689	86	5	Ccl3,Apoe,App,Ptger3,Bcl2	calcium ion homeostasis	0.697176
GO:0042098	1.25661	0.602289	87	5	Itgb2,Aif1,Slc11a1,Itgam,Il18	T cell proliferation	0.699336
GO:0006979	1.24124	0.605049	88	5	Cd36,Apoe,App,Idh1,Bcl2	response to oxidative stress	0.700456
GO:0010769	1.22623	0.607962	89	5	Dab2,Nrp1,Plxnb2,Rap2a,Zfp703	regulation of cell morphogenesis involved in differentiation	0.700456
GO:0006342	1.08073	0.614383	20	1	Apobec1	chromatin silencing	0.700456
GO:0007157	1.08073	0.614383	20	1	Cd164	heterophilic cell-cell adhesion	0.700456
GO:0008089	1.08073	0.614383	20	1	Kif1b	anterograde axon cargo transport	0.700456
GO:0010623	1.08073	0.614383	20	1	Bcl2	developmental programmed cell death	0.700456
GO:0030330	1.08073	0.614383	20	1	Spred1	DNA damage response, signal transduction by p53 class mediator	0.700456
GO:0032006	1.08073	0.614383	20	1	Lamtor3	regulation of TOR signaling cascade	0.700456
GO:0042491	1.08073	0.614383	20	1	Myo7a	auditory receptor cell differentiation	0.700456
GO:0043525	1.08073	0.614383	20	1	Ccl3	positive regulation of neuron apoptotic process	0.700456
GO:0045577	1.08073	0.614383	20	1	Il2rg	regulation of B cell differentiation	0.700456
GO:0046148	1.08073	0.614383	20	1	Myo5a	pigment biosynthetic process	0.700456
GO:0046330	1.08073	0.614383	20	1	Tlr4	positive regulation of JNK cascade	0.700456
GO:0048730	1.08073	0.614383	20	1	Bcl2	epidermis morphogenesis	0.700456
GO:0051928	1.08073	0.614383	20	1	Ccl3	positive regulation of calcium ion transport	0.700456
GO:0010975	1.24985	0.635195	105	6	Ndel1,Nrp1,Camk1,Inpp5j,Plxnb2,Rap2a	regulation of neuron projection development	0.722438
GO:0051051	1.24985	0.635195	105	6	Cd36,Pea15a,Litaf,Cd300a,Pid1,Bcl2	negative regulation of transport	0.722438
GO:0030323	1.22464	0.638435	107	6	Igf1,Lipa,Pdpn,Ctsh,Tgfbr2,Cebpa	respiratory tube development	0.72525
GO:0006875	1.18865	0.64428	110	6	Ccl3,Apoe,App,Ptger3,Slc30a7,Bcl2	cellular metal ion homeostasis	0.73101
GO:0007548	1.1771	0.646473	111	6	Axl,Mertk,Sgpl1,Ctsl,Hsd17b4,Bcl2	sex differentiation	0.731533
GO:0006986	1.4698	0.648615	30	2	Serp1,Ccnd1	response to unfolded protein	0.731533
GO:0008543	1.4698	0.648615	30	2	Dusp6,Fam20c	fibroblast growth factor receptor signaling pathway	0.731533
GO:0033555	1.4698	0.648615	30	2	Penk,Bcl2	multicellular organismal response to stress	0.731533
GO:0050773	1.4698	0.648615	30	2	Camk1,Rap2a	regulation of dendrite development	0.731533
GO:0006959	1.41886	0.653794	31	2	C1qa,Gpr183	humoral immune response	0.732125
GO:0010811	1.41886	0.653794	31	2	Dab2,Spp1	positive regulation of cell-substrate adhesion	0.732125
GO:0019233	1.41886	0.653794	31	2	Ccl3,Penk	sensory perception of pain	0.732125
GO:0030101	1.41886	0.653794	31	2	Axl,Mertk	natural killer cell activation	0.732125
GO:0044344	1.41886	0.653794	31	2	Dusp6,Fam20c	cellular response to fibroblast growth factor stimulus	0.732125
GO:2000648	1.41886	0.653794	31	2	Tgfbr2,Fbxw4	positive regulation of stem cell proliferation	0.732125
GO:0002456	1.37133	0.659254	32	2	Slc11a1,Ctsh	T cell mediated immunity	0.73216
GO:0009128	1.37133	0.659254	32	2	Dnajc10,Kif1b	purine nucleoside monophosphate catabolic process	0.73216
GO:0022407	1.37133	0.659254	32	2	Adam8,Zfp703	regulation of cell-cell adhesion	0.73216
GO:0050803	1.37133	0.659254	32	2	App,Camk1	regulation of synapse structure and activity	0.73216
GO:0051017	1.37133	0.659254	32	2	Rhoa,Aif1	actin filament bundle assembly	0.73216
GO:0060401	1.37133	0.659254	32	2	Ccl3,Bcl2	cytosolic calcium ion transport	0.73216
GO:0060402	1.37133	0.659254	32	2	Ccl3,Bcl2	calcium ion transport into cytosol	0.73216
GO:0017015	1.32686	0.664958	33	2	Adam17,Zfp703	regulation of transforming growth factor beta receptor signaling pathway	0.736761
GO:0030888	1.32686	0.664958	33	2	Tlr4,Gpr183	regulation of B cell proliferation	0.736761
GO:0030155	1.19274	0.667585	128	7	Cyth4,Dab2,Adam8,Spp1,Il18,Bcl2,Zfp703	regulation of cell adhesion	0.738804
GO:0006476	1.28517	0.670873	34	2	Sirt2,Spred1	protein deacetylation	0.739841
GO:0007188	1.28517	0.670873	34	2	Gna12,Ptger3	adenylate cyclase-modulating G-protein coupled receptor signaling pathway	0.739841
GO:0046890	1.28517	0.670873	34	2	Mid1ip1,Abcg1	regulation of lipid biosynthetic process	0.739841
GO:0007266	1.246	0.676965	35	2	Gna12,Rhoa	Rho protein signal transduction	0.743087
GO:0008637	1.246	0.676965	35	2	Igf1,Bcl2	apoptotic mitochondrial changes	0.743087
GO:0021675	1.246	0.676965	35	2	Ctsl,Nrp1	nerve development	0.743087
GO:0055007	1.246	0.676965	35	2	Rxra,Atg7	cardiac muscle cell differentiation	0.743087
GO:0048644	1.20913	0.683206	36	2	Rxra,Serp1	muscle organ morphogenesis	0.748198
GO:0051899	1.20913	0.683206	36	2	P2rx4,Shtn1	membrane depolarization	0.748198
GO:0001822	1.09959	0.685387	138	7	Sgpl1,Anxa4,Ptpro,Ctsh,Gcnt1,Aph1c,Bcl2	kidney development	0.749716
GO:0002761	1.17437	0.689569	37	2	Ccl3,Mitf	regulation of myeloid leukocyte differentiation	0.749946
GO:0035272	1.17437	0.689569	37	2	Igf1,Nrp1	exocrine system development	0.749946
GO:0042102	1.17437	0.689569	37	2	Aif1,Il18	positive regulation of T cell proliferation	0.749946
GO:0050728	1.17437	0.689569	37	2	Apoe,Tnfrsf1b	negative regulation of inflammatory response	0.749946
GO:0051092	1.17437	0.689569	37	2	Adam8,Rab7b	positive regulation of NF-kappaB transcription factor activity	0.749946
GO:0001837	1.14154	0.696029	38	2	Dab2,Zfp703	epithelial to mesenchymal transition	0.754039
GO:0002088	1.14154	0.696029	38	2	Tgfbr2,Maf	lens development in camera-type eye	0.754039
GO:0046620	1.14154	0.696029	38	2	Dusp6,Serp1	regulation of organ growth	0.754039
GO:0010608	1.12878	0.696528	154	8	App,Slc11a1,Patl2,Serp1,Tnfrsf1b,Ctsh,Apobec1,Bcl2	posttranscriptional regulation of gene expression	0.754039
GO:0007492	1.11049	0.702564	39	2	Dusp6,Dab2	endoderm development	0.757101
GO:0022602	1.11049	0.702564	39	2	Sgpl1,Bcl2	ovulation cycle process	0.757101
GO:0035150	1.11049	0.702564	39	2	Apoe,P2rx4	regulation of tube size	0.757101
GO:0050880	1.11049	0.702564	39	2	Apoe,P2rx4	regulation of blood vessel size	0.757101
GO:0021954	1.08104	0.709152	40	2	Ndel1,Atg7	central nervous system neuron development	0.760057
GO:0044242	1.08104	0.709152	40	2	Lpl,Hexa	cellular lipid catabolic process	0.760057
GO:0048588	1.08104	0.709152	40	2	App,Nrp1	developmental cell growth	0.760057
GO:0071229	1.08104	0.709152	40	2	Pid1,Lamtor3	cellular response to acid	0.760057
GO:0000302	1.05318	0.715774	41	2	Cd36,Bcl2	response to reactive oxygen species	0.760057
GO:0006164	1.05318	0.715774	41	2	Adcy7,Pid1	purine nucleotide biosynthetic process	0.760057
GO:0009266	1.05318	0.715774	41	2	Tfec,Myof	response to temperature stimulus	0.760057
GO:0031638	1.05318	0.715774	41	2	Ctsh,Hip1	zymogen activation	0.760057
GO:0043270	1.05318	0.715774	41	2	Ccl3,Tnfrsf11a	positive regulation of ion transport	0.760057
GO:0050731	1.05318	0.715774	41	2	Cd36,Csf1r	positive regulation of peptidyl-tyrosine phosphorylation	0.760057
GO:0051168	1.05318	0.715774	41	2	Prkaca,Camk1	nuclear export	0.760057
GO:0072091	1.05318	0.715774	41	2	Tgfbr2,Fbxw4	regulation of stem cell proliferation	0.760057
GO:2000021	1.05318	0.715774	41	2	Ccl3,Bcl2	regulation of ion homeostasis	0.760057
GO:0043086	1.13302	0.725364	192	10	Dusp3,Dusp6,Serpinb8,Spred1,Dgkz,Dusp7,Serpinb6a,Serpinb2,Fabp4,Serpinb10	negative regulation of catalytic activity	0.769375
GO:0009411	1.25979	0.73379	52	3	Zranb3,Bcl2,Ccnd1	response to UV	0.776567
GO:0030178	1.25979	0.73379	52	3	Ptpro,Lrp1,Ccnd1	negative regulation of Wnt receptor signaling pathway	0.776567
GO:0030072	1.20994	0.738822	54	3	Il1rn,Serp1,Myo5a	peptide hormone secretion	0.781017
GO:0002790	1.14209	0.747521	57	3	Il1rn,Serp1,Myo5a	peptide secretion	0.787381
GO:0010212	1.14209	0.747521	57	3	Nabp1,Apobec1,Bcl2	response to ionizing radiation	0.787381
GO:0060348	1.14209	0.747521	57	3	Rhoa,Nab2,Sh3pxd2b	bone development	0.787381
GO:0007605	1.12112	0.750681	58	3	Hexa,Myo7a,Pgap1	sensory perception of sound	0.787381
GO:0042633	1.12112	0.750681	58	3	Myo5a,Bcl2,Mpzl3	hair cycle	0.787381
GO:0045785	1.12112	0.750681	58	3	Dab2,Adam8,Spp1	positive regulation of cell adhesion	0.787381
GO:0050905	1.12112	0.750681	58	3	App,Hexa,Tpp1	neuromuscular process	0.787381
GO:0070613	1.10088	0.753952	59	3	Adam8,Adam9,Trib1	regulation of protein processing	0.789935
GO:0072089	1.08135	0.757325	60	3	Tgfbr2,Plxnb2,Fbxw4	stem cell proliferation	0.792588
GO:0051091	1.04435	0.764333	62	3	Adam8,Tnfrsf11a,Rab7b	positive regulation of sequence-specific DNA binding transcription factor activity	0.798153
GO:0051606	1.04435	0.764333	62	3	Tlr4,Naip2,Clec7a	detection of stimulus	0.798153
GO:0050954	1.02675	0.767951	63	3	Hexa,Myo7a,Pgap1	sensory perception of mechanical stimulus	0.801045
GO:0019226	1.17573	0.776931	74	4	Pmp22,Hexa,Nab2,Myo5a	transmission of nerve impulse	0.808625
GO:0030902	1.17573	0.776931	74	4	Igf1,Atg7,Bcl2,Mafb	hindbrain development	0.808625
GO:0015672	1.14264	0.780077	76	4	Atp6v1e1,Cd63,Slc38a7,Kcnn4	monovalent inorganic cation transport	0.811005
GO:0009101	1.12678	0.781813	77	4	Igf1,Cant1,Tusc3,Bcl2	glycoprotein biosynthetic process	0.811916
GO:0048511	1.11134	0.783649	78	4	Axl,Sgpl1,Tnfrsf11a,Bcl2	rhythmic process	0.812928
GO:0051216	1.09631	0.78558	79	4	Tgfbr2,Fbxw4,Mmp13,Maf	cartilage development	0.814037
GO:0030111	1.06748	0.789705	81	4	Ptpro,Lrp1,Ccnd1,Zfp703	regulation of Wnt receptor signaling pathway	0.817414
GO:0030278	1.04005	0.794145	83	4	Fam20c,Creb3l1,Cebpa,Bcl2	regulation of ossification	0.82111
GO:0007346	1.13042	0.80406	96	5	Dusp3,App,Aif1,Bcl2,Ccnd1	regulation of mitotic cell cycle	0.829544
GO:0051346	1.13042	0.80406	96	5	Serpinb8,Spred1,Serpinb6a,Serpinb2,Serpinb10	negative regulation of hydrolase activity	0.829544
GO:0007015	1.04832	0.813218	103	5	Rhoa,Aif1,Trf,Sirpa,Bcl2	actin filament organization	0.838076
GO:0048754	1.03753	0.814797	104	5	Igf1,Nrp1,Ctsh,Tgfbr2,Bcl2	branching morphogenesis of a tube	0.838788
GO:0060541	1.08231	0.824842	120	6	Igf1,Lipa,Pdpn,Ctsh,Tgfbr2,Cebpa	respiratory system development	0.848203
GO:0007178	1.0633	0.826811	122	6	Acvrl1,Dab2,Adam9,Trf,Adam17,Zfp703	transmembrane receptor protein serine/threonine kinase signaling pathway	0.849303
GO:0016049	1.05401	0.82788	123	6	App,Nrp1,Zmat3,Sgms1,Sertad2,Bcl2	cell growth	0.849477
GO:0031344	1.01838	0.832668	127	6	Ndel1,Nrp1,Camk1,Inpp5j,Plxnb2,Rap2a	regulation of cell projection organization	0.853462
GO:0072001	1.06625	0.838824	142	7	Sgpl1,Anxa4,Ptpro,Ctsh,Gcnt1,Aph1c,Bcl2	renal system development	0.858839
GO:0050801	1.07567	0.848143	161	8	Ccl3,Apoe,App,Atp6v0c,Slc11a1,Ptger3,Slc30a7,Bcl2	ion homeostasis	0.867439
GO:0001889	1.02664	1	42	2	Atg7,Cebpa	liver development	1
GO:0002260	1.02664	1	42	2	Bcl2,Pirb	lymphocyte homeostasis	1
GO:0002292	1.02654	1	21	1	Il4ra	T cell differentiation involved in immune response	1
GO:0006888	1.02654	1	21	1	Spast	ER to Golgi vesicle-mediated transport	1
GO:0015833	1.00972	1	64	3	Il1rn,Serp1,Myo5a	peptide transport	1
GO:0018108	1.00643	1	107	5	Cd36,App,Csf1r,Jak1,Rap2b	peptidyl-tyrosine phosphorylation	1
GO:0021545	1.02654	1	21	1	Nrp1	cranial nerve development	1
GO:0021879	1.02654	1	21	1	Atg7	forebrain neuron differentiation	1
GO:0030048	1.02654	1	21	1	Myo5a	actin filament-based movement	1
GO:0032269	1.00778	1	171	8	Dusp3,Dusp6,Dnajc10,Patl2,Spred1,Inpp5j,Dusp7,Fabp4	negative regulation of cellular protein metabolic process	1
GO:0042093	1.02654	1	21	1	Il4ra	T-helper cell differentiation	1
GO:0042542	1.02654	1	21	1	Bcl2	response to hydrogen peroxide	1
GO:0043467	1.02654	1	21	1	Igf1	regulation of generation of precursor metabolites and energy	1
GO:0046058	1.02654	1	21	1	Adcy7	cAMP metabolic process	1
GO:0050772	1.02654	1	21	1	Plxnb2	positive regulation of axonogenesis	1
GO:0060079	1.02654	1	21	1	P2rx4	regulation of excitatory postsynaptic membrane potential	1
GO:0060445	1.02654	1	21	1	Nrp1	branching involved in salivary gland morphogenesis	1
GO:0060996	1.02654	1	21	1	Camk1	dendritic spine development	1
GO:0061138	1.00143	1	129	6	Rxra,Igf1,Nrp1,Ctsh,Tgfbr2,Bcl2	morphogenesis of a branching epithelium	1
GO:1901216	1.02654	1	21	1	Ccl3	positive regulation of neuron death	1
GO:2001022	1.02654	1	21	1	Spred1	positive regulation of response to DNA damage stimulus	1

## Sheet: component 2 negative
	odds.ratio	p.value	n.categoy	n.category.and.component	genes	description	FDR
GO:0019827	3.87358	0.000366721	79	11	Vps72,Nanog,Med7,Pou5f1,Sall4,Piwil2,Rif1,Rbpj,Fgf4,Yap1,Dppa2	stem cell maintenance	0.116628
GO:0006446	7.45803	0.000434444	25	6	Ddx3x,Eif2b5,Mtif3,Eif2b4,Eif2b1,Eif4ebp1	regulation of translational initiation	0.116628
GO:0006275	6.74715	0.000677284	27	6	Cdt1,Gtpbp4,Chek2,Wapl,Ticrr,Trp53	regulation of DNA replication	0.116628
GO:0006413	5.52588	0.000683035	37	7	Ddx3x,Eif2b5,Mtif3,Eif2b4,Eif2b1,Eif4ebp1,Ticrr	translational initiation	0.116628
GO:0048863	2.66434	0.000952297	161	16	Vps72,Nanog,Med7,Zscan10,Pou5f1,Sall4,Piwil2,Rif1,Ovol2,Jarid2,Rbpj,Fgf4,Gja1,Yap1,Foxd3,Dppa2	stem cell differentiation	0.130084
GO:0048864	2.71202	0.00161518	138	14	Vps72,Nanog,Med7,Pou5f1,Sall4,Piwil2,Rif1,Ovol2,Rbpj,Fgf4,Gja1,Yap1,Foxd3,Dppa2	stem cell development	0.183862
GO:0060711	5.24288	0.00205756	33	6	Dnajb6,Ovol2,Rbpj,Erf,Fzd5,Hs6st1	labyrinthine layer development	0.200759
GO:0006520	2.81205	0.00252248	114	12	Folr1,Sod2,Ddah2,P4ha2,Tdh,Cth,Aass,Bcat1,Atcay,Gstp2,Ccbl2,Mat2b	cellular amino acid metabolic process	0.215357
GO:0007005	2.59225	0.00327296	133	13	Tfam,Sod2,Ict1,Pnpt1,Rnaseh1,March5,Higd2a,Mterf4,Mtfr1,Gfm1,Atcay,Rnf7,Trp53	mitochondrion organization	0.241481
GO:0060716	7.8166	0.0035356	16	4	Ovol2,Rbpj,Fzd5,Hs6st1	labyrinthine layer blood vessel development	0.241481
GO:0048589	2.46715	0.00512673	150	14	Rarg,Setdb1,Sbds,Ttl,Sall4,Ncoa3,Ulk1,Sall1,Ryk,Rbpj,Zfp830,Gja1,Foxd3,Zfp568	developmental growth	0.316975
GO:0001832	6.69696	0.00556911	18	4	Setdb1,Sbds,Sall4,Zfp830	blastocyst growth	0.316975
GO:0016571	3.51703	0.00646173	54	7	Suz12,Wdr5,Coprs,Jarid2,Kdm3a,Suv420h2,Dppa2	histone methylation	0.331833
GO:0001502	10.0114	0.00680185	10	3	Sulf1,Ctgf,Fgf4	cartilage condensation	0.331833
GO:0001892	3.05216	0.00794194	70	8	Dnajb6,Ovol2,Rbpj,Erf,Fzd5,Hs6st1,Foxd3,Zfp568	embryonic placenta development	0.348986
GO:0007093	4.51807	0.00825014	31	5	Chek2,Bcat1,Ticrr,Csnk2a2,Trp53	mitotic cell cycle checkpoint	0.348986
GO:0033044	3.30424	0.00868633	57	7	Tinf2,Jarid2,Wapl,Tada3,Kdm3a,Trp53,Dppa2	regulation of chromosome organization	0.348986
GO:0006417	2.95571	0.00938202	72	8	Ddx3x,Eif2b5,Mtif3,Fxr1,Eif2b4,Eif2b1,Eif4ebp1,Piwil2	regulation of translation	0.355996
GO:0006479	2.90972	0.0101711	73	8	Suz12,Wdr5,Coprs,Setd6,Jarid2,Kdm3a,Suv420h2,Dppa2	protein methylation	0.365625
GO:0010332	5.20583	0.0116915	22	4	Sod2,Chek2,Yap1,Trp53	response to gamma radiation	0.381408
GO:0001833	7.78703	0.0117271	12	3	Setdb1,Sbds,Sall4	inner cell mass cell proliferation	0.381408
GO:0009063	4.68427	0.0159203	24	4	Ddah2,Tdh,Aass,Bcat1	cellular amino acid catabolic process	0.452949
GO:0060674	4.68427	0.0159203	24	4	Ovol2,Rbpj,Fzd5,Hs6st1	placenta blood vessel development	0.452949
GO:0006412	2.3118	0.0183092	124	11	Ddx3x,Eif2b5,Mtif3,Ict1,Fxr1,Gfm1,Eif2b4,Eif2b1,Eif4ebp1,Piwil2,Ticrr	translation	0.452949
GO:0050768	3.06733	0.0196828	52	6	Dll3,Ulk1,Ryk,Trp53,Dynlt1a,Dynlt1f	negative regulation of neurogenesis	0.452949
GO:0035108	2.51711	0.0209894	83	8	Rarg,Sulf1,Hdac2,Sall4,Ift122,Sall1,Fgf4,Gja1	limb morphogenesis	0.452949
GO:0022618	3.45064	0.0213956	39	5	Ddx3x,Mterf4,Clp1,Pqbp1,Ticrr	ribonucleoprotein complex assembly	0.452949
GO:0031056	3.45064	0.0213956	39	5	Jarid2,Tada3,Kdm3a,Trp53,Dppa2	regulation of histone modification	0.452949
GO:0014003	5.83699	0.0221297	15	3	Eif2b5,Eif2b4,Eif2b1	oligodendrocyte development	0.452949
GO:0046164	5.83699	0.0221297	15	3	Impa2,Impa1,Mtmr7	alcohol catabolic process	0.452949
GO:0090311	5.83699	0.0221297	15	3	Hdac2,Tada3,Trp53	regulation of protein deacetylation	0.452949
GO:0000075	2.65899	0.0233571	69	7	Cdt1,Chek2,Bcat1,Cdc14b,Ticrr,Csnk2a2,Trp53	cell cycle checkpoint	0.452949
GO:0048588	3.35147	0.0236523	40	5	Rarg,Ttl,Ulk1,Ryk,Foxd3	developmental cell growth	0.452949
GO:0017148	4.07104	0.0238729	27	4	Ddx3x,Fxr1,Eif2b4,Eif4ebp1	negative regulation of translation	0.452949
GO:0032526	4.07104	0.0238729	27	4	Nanog,Dnaaf2,Pou5f1,Scamp3	response to retinoic acid	0.452949
GO:0060173	2.45088	0.0238743	85	8	Rarg,Sulf1,Hdac2,Sall4,Ift122,Sall1,Fgf4,Gja1	limb development	0.452949
GO:0030518	3.90094	0.0269719	28	4	Pias2,Dnaja1,Taf7,Skp2	intracellular steroid hormone receptor signaling pathway	0.484785
GO:0048709	3.90094	0.0269719	28	4	Eif2b5,Hdac2,Eif2b4,Eif2b1	oligodendrocyte differentiation	0.484785
GO:0000045	5.00264	0.0311232	17	3	Atg13,Ulk1,Wdr45	autophagic vacuole assembly	0.488646
GO:0000086	5.00264	0.0311232	17	3	Chek2,Ticrr,Skp2	G2/M transition of mitotic cell cycle	0.488646
GO:0060669	5.00264	0.0311232	17	3	Dnajb6,Erf,Zfp568	embryonic placenta morphogenesis	0.488646
GO:0035050	3.08527	0.0313228	43	5	Ift122,Ovol2,Rbpj,Gja1,Yap1	embryonic heart tube development	0.488646
GO:0010721	2.71052	0.0319119	58	6	Dll3,Ulk1,Ryk,Trp53,Dynlt1a,Dynlt1f	negative regulation of cell development	0.488646
GO:0030522	2.71052	0.0319119	58	6	Rarg,Pias2,Dnaja1,Taf7,Skp2,Nr1h2	intracellular receptor mediated signaling pathway	0.488646
GO:0060560	2.4583	0.0327799	74	7	Rarg,Ttl,Ulk1,Sall1,Ryk,Foxd3,Zfp568	developmental growth involved in morphogenesis	0.488646
GO:0048675	3.59944	0.0338614	30	4	Ttl,Ulk1,Ryk,Foxd3	axon extension	0.488646
GO:0042594	3.00563	0.0341882	44	5	Atg13,Ulk1,Fbxo22,Wdr45,Acadm	response to starvation	0.488646
GO:0001824	2.6589	0.0343412	59	6	Setdb1,Pou5f1,Sbds,Sall4,Zfp830,Foxd3	blastocyst development	0.488646
GO:0045727	4.66723	0.0362341	18	3	Ddx3x,Eif2b5,Piwil2	positive regulation of translation	0.493998
GO:0051653	4.66723	0.0362341	18	3	Wasl,Dynlt1a,Dynlt1f	spindle localization	0.493998
GO:0032259	2.31165	0.0368871	101	9	Suz12,Wdr5,Coprs,Setd6,Piwil2,Jarid2,Kdm3a,Suv420h2,Dppa2	methylation	0.493998
GO:0031060	4.37543	0.0417476	19	3	Jarid2,Kdm3a,Dppa2	regulation of histone methylation	0.548339
GO:0006997	3.22543	0.0459475	33	4	Rrn3,Sumo1,Agfg1,Kdm3a	nucleus organization	0.571045
GO:0009636	2.72413	0.04724	48	5	Ppp2cb,Ddc,Mt2,Wapl,Htr1d	response to toxin	0.571045
GO:0018208	4.11749	0.0476568	20	3	P4ha2,Ppid,Crtap	peptidyl-proline modification	0.571045
GO:0043113	4.11749	0.0476568	20	3	Etv5,Ift122,Clec2i	receptor clustering	0.571045
GO:2000045	4.11749	0.0476568	20	3	Ddx3x,Bcat1,Trp53	regulation of G1/S transition of mitotic cell cycle	0.571045
GO:0003143	3.11739	0.0504448	34	4	Ovol2,Rbpj,Gja1,Yap1	embryonic heart tube morphogenesis	0.583962
GO:0045333	3.11739	0.0504448	34	4	Sod2,Slc25a13,Pnpt1,Mtfr1	cellular respiration	0.583962
GO:0021782	3.01631	0.055175	35	4	Eif2b5,Eif2b4,Eif2b1,Foxd3	glial cell development	0.603097
GO:0006839	2.92155	0.0601365	36	4	Slc25a13,Pnpt1,Mterf4,Trp53	mitochondrial transport	0.603097
GO:0000132	5.81607	0.0618596	10	2	Dynlt1a,Dynlt1f	establishment of mitotic spindle orientation	0.603097
GO:0010874	5.81607	0.0618596	10	2	Pla2g10,Nr1h2	regulation of cholesterol efflux	0.603097
GO:0030521	5.81607	0.0618596	10	2	Pias2,Dnaja1	androgen receptor signaling pathway	0.603097
GO:0031063	5.81607	0.0618596	10	2	Tada3,Trp53	regulation of histone deacetylation	0.603097
GO:0043616	5.81607	0.0618596	10	2	Ovol2,Yap1	keratinocyte proliferation	0.603097
GO:0060485	2.11578	0.063013	97	8	Dll3,Ovol2,Rbpj,Gja1,Yap1,Dppa4,Foxd3,Dppa2	mesenchyme development	0.603097
GO:0010608	1.81637	0.0646661	154	11	Ddx3x,Eif2b5,Mtif3,Gtpbp4,Clp1,Fxr1,Eif2b4,Eif2b1,Eif4ebp1,Piwil2,Tada3	posttranscriptional regulation of gene expression	0.603097
GO:0007283	1.80344	0.066371	155	11	Bcap31,Ace,Trip13,Morc1,Agfg1,Xrn2,Dnaja1,Crtap,Piwil2,Tex19.1,Kdm3a	spermatogenesis	0.603097
GO:0001890	2.06838	0.0666595	99	8	Dnajb6,Ovol2,Rbpj,Erf,Fzd5,Hs6st1,Foxd3,Zfp568	placenta development	0.603097
GO:0006006	2.43818	0.067195	53	5	Dusp12,Gpd2,Wdtc1,Gckr,Acadm	glucose metabolic process	0.603097
GO:0001756	2.74875	0.0707439	38	4	Dll3,Gdf3,Rbpj,Trp53	somitogenesis	0.603097
GO:0034968	2.74875	0.0707439	38	4	Wdr5,Jarid2,Kdm3a,Suv420h2	histone lysine methylation	0.603097
GO:0016570	1.82006	0.0719459	168	12	Suz12,Hdac2,Yeats4,Rnf2,Wdr5,Coprs,Jarid2,Tada3,Kdm3a,Trp53,Suv420h2,Dppa2	histone modification	0.603097
GO:0001711	5.16942	0.0735907	11	2	Nanog,Pou5f1	endodermal cell fate commitment	0.603097
GO:0002063	5.16942	0.0735907	11	2	Rarg,Sulf1	chondrocyte development	0.603097
GO:0007398	5.16942	0.0735907	11	2	Pou5f1,Erf	ectoderm development	0.603097
GO:0030903	5.16942	0.0735907	11	2	Gdf3,Yap1	notochord development	0.603097
GO:0032374	5.16942	0.0735907	11	2	Pla2g10,Nr1h2	regulation of cholesterol transport	0.603097
GO:0040001	5.16942	0.0735907	11	2	Dynlt1a,Dynlt1f	establishment of mitotic spindle localization	0.603097
GO:0048333	5.16942	0.0735907	11	2	Nanog,Pou5f1	mesodermal cell differentiation	0.603097
GO:0071479	5.16942	0.0735907	11	2	Yap1,Trp53	cellular response to ionizing radiation	0.603097
GO:0010906	3.33102	0.075056	24	3	Dusp12,Gckr,Acadm	regulation of glucose metabolic process	0.603097
GO:0035137	3.33102	0.075056	24	3	Rarg,Sall1,Fgf4	hindlimb morphogenesis	0.603097
GO:0043648	3.33102	0.075056	24	3	Folr1,Atcay,Ccbl2	dicarboxylic acid metabolic process	0.603097
GO:0016236	3.17909	0.0827885	25	3	Atg13,Ulk1,Wdr45	macroautophagy	0.632
GO:0000266	4.65159	0.0859635	12	2	March5,Mtfr1	mitochondrial fission	0.632
GO:0007128	4.65159	0.0859635	12	2	Trip13,Piwil2	meiotic prophase I	0.632
GO:0035987	4.65159	0.0859635	12	2	Nanog,Pou5f1	endodermal cell differentiation	0.632
GO:0051180	4.65159	0.0859635	12	2	Folr1,Slc23a2	vitamin transport	0.632
GO:0051294	4.65159	0.0859635	12	2	Dynlt1a,Dynlt1f	establishment of spindle orientation	0.632
GO:2000134	4.65159	0.0859635	12	2	Bcat1,Trp53	negative regulation of G1/S transition of mitotic cell cycle	0.632
GO:0010212	2.24906	0.0860556	57	5	Sod2,Chek2,Ticrr,Yap1,Trp53	response to ionizing radiation	0.632
GO:0009267	2.52447	0.0883168	41	4	Atg13,Ulk1,Fbxo22,Wdr45	cellular response to starvation	0.641706
GO:0006260	2.08032	0.0903117	86	7	Cdt1,Rnaseh1,Gtpbp4,Chek2,Wapl,Ticrr,Trp53	DNA replication	0.648591
GO:0007568	2.20629	0.0911635	58	5	Sod2,Pnpt1,March5,Tfcp2l1,Trp53	aging	0.648591
GO:0061053	2.45766	0.0946014	42	4	Dll3,Gdf3,Rbpj,Trp53	somite development	0.653128
GO:0048232	1.79069	0.09749	156	11	Bcap31,Ace,Trip13,Morc1,Agfg1,Xrn2,Dnaja1,Crtap,Piwil2,Tex19.1,Kdm3a	male gamete generation	0.653128
GO:0032370	4.22851	0.0989049	13	2	Pla2g10,Nr1h2	positive regulation of lipid transport	0.653128
GO:0045861	4.22851	0.0989049	13	2	Nr1h2,Ubxn1	negative regulation of proteolysis	0.653128
GO:0060561	4.22851	0.0989049	13	2	Fzd5,Fgf4	apoptotic process involved in morphogenesis	0.653128
GO:0016575	2.9132	0.0992197	27	3	Hdac2,Tada3,Trp53	histone deacetylation	0.653128
GO:0032535	1.97862	0.100123	90	7	Ttl,Ulk1,Wasl,Clec2i,Ryk,Wdtc1,Baiap2l1	regulation of cellular component size	0.653128
GO:0000077	2.39424	0.101092	43	4	Chek2,Bcat1,Cdc14b,Trp53	DNA damage checkpoint	0.653128
GO:0016049	1.85789	0.101631	123	9	Ddx3x,Rarg,Ttl,Xrn2,Ulk1,Ryk,Trp53,Ei24,Foxd3	cell growth	0.653128
GO:0000060	3.87588	0.112347	14	2	Gckr,Trp53	protein import into nucleus, translocation	0.653128
GO:0006368	3.87588	0.112347	14	2	Supt4a,Eapp	transcription elongation from RNA polymerase II promoter	0.653128
GO:0010453	3.87588	0.112347	14	2	Nanog,Rbpj	regulation of cell fate commitment	0.653128
GO:0030513	3.87588	0.112347	14	2	Sulf1,Rbpj	positive regulation of BMP signaling pathway	0.653128
GO:0048147	3.87588	0.112347	14	2	Sod2,Trp53	negative regulation of fibroblast proliferation	0.653128
GO:0051567	3.87588	0.112347	14	2	Jarid2,Kdm3a	histone H3-K9 methylation	0.653128
GO:0060713	3.87588	0.112347	14	2	Dnajb6,Erf	labyrinthine layer morphogenesis	0.653128
GO:0061384	3.87588	0.112347	14	2	Ovol2,Rbpj	heart trabecula morphogenesis	0.653128
GO:0031396	2.04988	0.113106	62	5	Ubxn2a,Gtpbp4,Fbxo22,Cdc14b,Ubxn1	regulation of protein ubiquitination	0.653128
GO:0031667	2.04988	0.113106	62	5	Atg13,Ulk1,Fbxo22,Wdr45,Acadm	response to nutrient levels	0.653128
GO:0048469	2.04988	0.113106	62	5	Trip13,Tfcp2l1,Fzd5,Gja1,Klf2	cell maturation	0.653128
GO:0008361	2.27671	0.114667	45	4	Ttl,Ulk1,Ryk,Wdtc1	regulation of cell size	0.653128
GO:0006790	1.86454	0.115506	95	7	Sod2,Sulf1,Acot8,Cth,Gstp2,Mat2b,Hs6st1	sulfur compound metabolic process	0.653128
GO:0001947	2.68821	0.116842	29	3	Ovol2,Rbpj,Gja1	heart looping	0.653128
GO:0035019	2.68821	0.116842	29	3	Vps72,Rbpj,Yap1	somatic stem cell maintenance	0.653128
GO:0007346	1.84327	0.118979	96	7	Ddx3x,Nanog,Chek2,Bcat1,Ticrr,Csnk2a2,Trp53	regulation of mitotic cell cycle	0.653128
GO:0008543	2.5884	0.126062	30	3	Sulf1,Ctgf,Fgf4	fibroblast growth factor receptor signaling pathway	0.653128
GO:0030510	2.5884	0.126062	30	3	Nanog,Sulf1,Rbpj	regulation of BMP signaling pathway	0.653128
GO:0048066	2.5884	0.126062	30	3	Sod2,Gna11,Foxd3	developmental pigmentation	0.653128
GO:0061371	2.5884	0.126062	30	3	Ovol2,Rbpj,Gja1	determination of heart left/right asymmetry	0.653128
GO:0001829	3.57693	0.126227	15	2	Pou5f1,Foxd3	trophectodermal cell differentiation	0.653128
GO:0006094	3.57693	0.126227	15	2	Gpd2,Acadm	gluconeogenesis	0.653128
GO:0006635	3.57693	0.126227	15	2	Pex7,Acadm	fatty acid beta-oxidation	0.653128
GO:0010259	3.57693	0.126227	15	2	Tfcp2l1,Trp53	multicellular organismal aging	0.653128
GO:0033143	3.57693	0.126227	15	2	Pias2,Skp2	regulation of intracellular steroid hormone receptor signaling pathway	0.653128
GO:0034644	3.57693	0.126227	15	2	Bcat1,Trp53	cellular response to UV	0.653128
GO:0048339	3.57693	0.126227	15	2	Dll3,Yap1	paraxial mesoderm development	0.653128
GO:0042254	2.16992	0.128997	47	4	Ddx3x,Rrn3,Sbds,Mterf4	ribosome biogenesis	0.660351
GO:0006091	2.03642	0.130523	75	6	Sod2,Slc25a13,Pnpt1,Mtfr1,Aass,Acadm	generation of precursor metabolites and energy	0.660351
GO:0010001	2.03642	0.130523	75	6	Eif2b5,Hdac2,Eif2b4,Eif2b1,Dner,Foxd3	glial cell differentiation	0.660351
GO:0044344	2.49529	0.135534	31	3	Sulf1,Ctgf,Fgf4	cellular response to fibroblast growth factor stimulus	0.666327
GO:0009991	1.97833	0.136282	77	6	Atg13,Ulk1,Fbxo22,Nudt1,Wdr45,Acadm	response to extracellular stimulus	0.666327
GO:0031669	2.12028	0.136429	48	4	Atg13,Ulk1,Fbxo22,Wdr45	cellular response to nutrient levels	0.666327
GO:0006970	3.32092	0.140485	16	2	Ddx3x,Trp53	response to osmotic stress	0.666327
GO:0016574	3.32092	0.140485	16	2	Suz12,Rnf2	histone ubiquitination	0.666327
GO:0022904	3.32092	0.140485	16	2	Sod2,Slc25a13	respiratory electron transport chain	0.666327
GO:0030520	3.32092	0.140485	16	2	Taf7,Skp2	intracellular estrogen receptor signaling pathway	0.666327
GO:0032784	3.32092	0.140485	16	2	Supt4a,Eapp	regulation of DNA-dependent transcription, elongation	0.666327
GO:0033344	3.32092	0.140485	16	2	Pla2g10,Nr1h2	cholesterol efflux	0.666327
GO:0010564	1.78802	0.143671	113	8	Ddx3x,Chordc1,Chek2,Bcat1,Wapl,Ticrr,Csnk2a2,Trp53	regulation of cell cycle process	0.676738
GO:0009128	2.40887	0.145243	32	3	Ddx3x,Clpx,Nudt9	purine nucleoside monophosphate catabolic process	0.679457
GO:0000082	2.02737	0.151796	50	4	Ddx3x,Bcat1,Skp2,Trp53	G1/S transition of mitotic cell cycle	0.697254
GO:0035282	2.02737	0.151796	50	4	Dll3,Gdf3,Rbpj,Trp53	segmentation	0.697254
GO:0001706	3.09906	0.155066	17	2	Nanog,Pou5f1	endoderm formation	0.697254
GO:0019319	3.09906	0.155066	17	2	Gpd2,Acadm	hexose biosynthetic process	0.697254
GO:0030512	3.09906	0.155066	17	2	Eid2,Trp53	negative regulation of transforming growth factor beta receptor signaling pathway	0.697254
GO:0001708	2.32804	0.155172	33	3	Nanog,Pou5f1,Rbpj	cell fate specification	0.697254
GO:0006476	2.25272	0.165307	34	3	Hdac2,Tada3,Trp53	protein deacetylation	0.711997
GO:0007188	2.25272	0.165307	34	3	Gna13,Gna11,Oxgr1	adenylate cyclase-modulating G-protein coupled receptor signaling pathway	0.711997
GO:0030850	2.25272	0.165307	34	3	Wdr77,Rarg,Sulf1	prostate gland development	0.711997
GO:0032269	1.61823	0.167153	171	11	Ddx3x,Chordc1,Gtpbp4,Cdk5rap1,Fxr1,Eif2b4,Eif4ebp1,Jarid2,Kdm3a,Nr1h2,Ubxn1	negative regulation of cellular protein metabolic process	0.711997
GO:0000079	2.90492	0.16992	18	2	Gtpbp4,Cdk5rap1	regulation of cyclin-dependent protein kinase activity	0.711997
GO:0003156	2.90492	0.16992	18	2	Sulf1,Rbpj	regulation of organ formation	0.711997
GO:0016925	2.90492	0.16992	18	2	Pias2,Sumo1	protein sumoylation	0.711997
GO:0031128	2.90492	0.16992	18	2	Sall1,Rbpj	developmental induction	0.711997
GO:0060571	2.90492	0.16992	18	2	Sulf1,Ovol2	morphogenesis of an epithelial fold	0.711997
GO:0060993	2.90492	0.16992	18	2	Sall1,Nphp3	kidney morphogenesis	0.711997
GO:0071482	2.90492	0.16992	18	2	Bcat1,Trp53	cellular response to light stimulus	0.711997
GO:0008637	2.18181	0.175632	35	3	Sod2,Rnf7,Trp53	apoptotic mitochondrial changes	0.721984
GO:0021675	2.18181	0.175632	35	3	Sulf1,Sall1,Foxd3	nerve development	0.721984
GO:0006979	1.70947	0.180441	88	6	Sod2,Ppp2cb,Pnpt1,Oxsr1,Rnf7,Trp53	response to oxidative stress	0.721984
GO:0007062	2.73361	0.184999	19	2	Pogz,Wapl	sister chromatid cohesion	0.721984
GO:0030516	2.73361	0.184999	19	2	Ttl,Ryk	regulation of axon extension	0.721984
GO:0032330	2.73361	0.184999	19	2	Rarg,Ctgf	regulation of chondrocyte differentiation	0.721984
GO:0050771	2.73361	0.184999	19	2	Ulk1,Ryk	negative regulation of axonogenesis	0.721984
GO:0051865	2.73361	0.184999	19	2	March5,Rnf115	protein autoubiquitination	0.721984
GO:0030833	2.11547	0.186132	36	3	Wasl,Clec2i,Baiap2l1	regulation of actin filament polymerization	0.721984
GO:0007498	2.01417	0.187298	63	5	Dll3,Nanog,Pou5f1,Gdf3,Yap1	mesoderm development	0.721984
GO:0031668	2.01417	0.187298	63	5	Atg13,Ulk1,Fbxo22,Nudt1,Wdr45	cellular response to extracellular stimulus	0.721984
GO:0001755	2.58113	0.20026	20	2	Ovol2,Foxd3	neural crest cell migration	0.721984
GO:0007129	2.58113	0.20026	20	2	Trip13,Tex19.1	synapsis	0.721984
GO:0010623	2.58113	0.20026	20	2	Fzd5,Fgf4	developmental programmed cell death	0.721984
GO:0010955	2.58113	0.20026	20	2	Nr1h2,Ubxn1	negative regulation of protein processing	0.721984
GO:0031058	2.58113	0.20026	20	2	Jarid2,Trp53	positive regulation of histone modification	0.721984
GO:0031397	2.58113	0.20026	20	2	Gtpbp4,Ubxn1	negative regulation of protein ubiquitination	0.721984
GO:0035116	2.58113	0.20026	20	2	Rarg,Fgf4	embryonic hindlimb morphogenesis	0.721984
GO:0048048	2.58113	0.20026	20	2	Rarg,Vax2	embryonic eye morphogenesis	0.721984
GO:0030326	1.88291	0.201305	67	5	Rarg,Hdac2,Sall4,Ift122,Fgf4	embryonic limb morphogenesis	0.721984
GO:0006261	1.99383	0.207595	38	3	Cdt1,Rnaseh1,Ticrr	DNA-dependent DNA replication	0.721984
GO:0008277	1.99383	0.207595	38	3	Usp33,Dynlt1a,Dynlt1f	regulation of G-protein coupled receptor protein signaling pathway	0.721984
GO:0009952	1.65391	0.210642	106	7	Rarg,Dll3,Rnf2,Gdf3,Rbpj,Grsf1,Trp53	anterior/posterior pattern specification	0.721984
GO:0016331	1.65391	0.210642	106	7	Sulf1,Sall4,Ift122,Sall1,Ovol2,Grsf1,Zfp568	morphogenesis of embryonic epithelium	0.721984
GO:0008033	2.44505	0.21566	21	2	Wdr4,Clp1	tRNA processing	0.721984
GO:0009062	2.44505	0.21566	21	2	Pex7,Acadm	fatty acid catabolic process	0.721984
GO:0021545	2.44505	0.21566	21	2	Sall1,Foxd3	cranial nerve development	0.721984
GO:0030318	2.44505	0.21566	21	2	Gna11,Foxd3	melanocyte differentiation	0.721984
GO:0042542	2.44505	0.21566	21	2	Sod2,Ppp2cb	response to hydrogen peroxide	0.721984
GO:0002062	1.93811	0.218529	39	3	Rarg,Sulf1,Ctgf	chondrocyte differentiation	0.721984
GO:0007492	1.93811	0.218529	39	3	Nanog,Pou5f1,Gdf3	endoderm development	0.721984
GO:0018205	1.74074	0.223977	72	5	Yeats4,Wdr5,Cth,Setd6,Kdm3a	peptidyl-lysine modification	0.721984
GO:0007548	1.57292	0.227582	111	7	Eif2b5,Nanog,Ncoa3,Eif2b4,Tex19.1,Fzd5,Eif2s2	sex differentiation	0.721984
GO:0007569	1.88543	0.229579	40	3	Pnpt1,March5,Trp53	cell aging	0.721984
GO:0030258	1.88543	0.229579	40	3	Pex7,Mtmr7,Acadm	lipid modification	0.721984
GO:0003002	1.50324	0.230674	166	10	Rarg,Dll3,Rnf2,Gdf3,Ift122,Vax2,Ovol2,Rbpj,Grsf1,Trp53	regionalization	0.721984
GO:0001974	2.32227	0.231164	22	2	Rbpj,Gja1	blood vessel remodeling	0.721984
GO:0009408	2.32227	0.231164	22	2	Eif2b5,St8sia1	response to heat	0.721984
GO:0019395	2.32227	0.231164	22	2	Pex7,Acadm	fatty acid oxidation	0.721984
GO:0060512	2.32227	0.231164	22	2	Rarg,Sulf1	prostate gland morphogenesis	0.721984
GO:0060740	2.32227	0.231164	22	2	Rarg,Sulf1	prostate gland epithelium morphogenesis	0.721984
GO:0001655	1.47404	0.236754	169	10	Wdr77,Rarg,Nid1,Sulf1,Ace,Sall1,Nphp3,Tet2,Aqp11,Foxd3	urogenital system development	0.721984
GO:0006338	1.83534	0.240732	41	3	Actl6a,Ino80,Rere	chromatin remodeling	0.721984
GO:0009266	1.83534	0.240732	41	3	Eif2b5,St8sia1,Acadm	response to temperature stimulus	0.721984
GO:0034599	1.83534	0.240732	41	3	Sod2,Pnpt1,Rnf7	cellular response to oxidative stress	0.721984
GO:0060349	1.83534	0.240732	41	3	Rarg,Pex7,Fgf4	bone morphogenesis	0.721984
GO:0072091	1.83534	0.240732	41	3	Yap1,Trp53,Dppa2	regulation of stem cell proliferation	0.721984
GO:0006302	1.64146	0.245622	76	5	Trip13,Sfr1,Chek2,Setx,Trp53	double-strand break repair	0.721984
GO:0043254	1.64146	0.245622	76	5	Ddx3x,Rrn3,Wasl,Clec2i,Baiap2l1	regulation of protein complex assembly	0.721984
GO:0001702	2.21147	0.246735	23	2	Rnf2,Gdf3	gastrulation with mouth forming second	0.721984
GO:0001825	2.21147	0.246735	23	2	Pou5f1,Foxd3	blastocyst formation	0.721984
GO:0006835	2.21147	0.246735	23	2	Folr1,Slc25a13	dicarboxylic acid transport	0.721984
GO:0060444	2.21147	0.246735	23	2	Etv5,Ncoa3	branching involved in mammary gland duct morphogenesis	0.721984
GO:0061383	2.21147	0.246735	23	2	Ovol2,Rbpj	trabecula morphogenesis	0.721984
GO:0043623	1.60104	0.248911	125	8	Tfam,Dnaaf2,Higd2a,Wasl,Clec2i,Baiap2l1,Pogz,Eid2	cellular protein complex assembly	0.721984
GO:0001889	1.78805	0.251972	42	3	Sod2,Jarid2,Acadm	liver development	0.721984
GO:0016051	1.78805	0.251972	42	3	Mpdu1,Gpd2,Acadm	carbohydrate biosynthetic process	0.721984
GO:0030041	1.78805	0.251972	42	3	Wasl,Clec2i,Baiap2l1	actin filament polymerization	0.721984
GO:0001836	2.11072	0.262343	24	2	Sod2,Trp53	release of cytochrome c from mitochondria	0.721984
GO:0006749	2.11072	0.262343	24	2	Sod2,Gstp2	glutathione metabolic process	0.721984
GO:0031047	2.11072	0.262343	24	2	Clp1,Piwil2	gene silencing by RNA	0.721984
GO:0042770	2.11072	0.262343	24	2	Chek2,Trp53	signal transduction in response to DNA damage	0.721984
GO:0001501	1.42477	0.265564	192	11	Rarg,Dll3,Sulf1,Ctgf,Pex7,Wdr5,Gdf3,Ryk,Gna11,Fgf4,Foxd3	skeletal system development	0.721984
GO:0043065	1.48416	0.269442	134	8	Ddx3x,Rarg,Capn10,Pdia3,Ddx20,Ubd,Melk,Trp53	positive regulation of apoptotic process	0.721984
GO:0008406	1.68856	0.272973	89	6	Eif2b5,Nanog,Eif2b4,Tex19.1,Fzd5,Eif2s2	gonad development	0.721984
GO:0043068	1.46042	0.275494	136	8	Ddx3x,Rarg,Capn10,Pdia3,Ddx20,Ubd,Melk,Trp53	positive regulation of programmed cell death	0.721984
GO:0015918	2.01847	0.277956	25	2	Pla2g10,Nr1h2	sterol transport	0.721984
GO:0030301	2.01847	0.277956	25	2	Pla2g10,Nr1h2	cholesterol transport	0.721984
GO:0030838	2.01847	0.277956	25	2	Wasl,Baiap2l1	positive regulation of actin filament polymerization	0.721984
GO:0060563	2.01847	0.277956	25	2	Gna11,Foxd3	neuroepithelial cell differentiation	0.721984
GO:0030308	1.90225	0.280844	53	4	Ulk1,Ryk,Trp53,Ei24	negative regulation of cell growth	0.721984
GO:0001822	1.43741	0.282036	138	8	Nid1,Sulf1,Ace,Sall1,Nphp3,Tet2,Aqp11,Foxd3	kidney development	0.721984
GO:0010942	1.42617	0.285483	139	8	Ddx3x,Rarg,Capn10,Pdia3,Ddx20,Ubd,Melk,Trp53	positive regulation of cell death	0.721984
GO:0001558	1.59113	0.286721	94	6	Ddx3x,Ttl,Ulk1,Ryk,Trp53,Ei24	regulation of cell growth	0.721984
GO:0048638	1.82687	0.289069	55	4	Ttl,Ulk1,Ryk,Rbpj	regulation of developmental growth	0.721984
GO:0045926	1.57296	0.290044	95	6	Pnpt1,Ulk1,Mt2,Ryk,Trp53,Ei24	negative regulation of growth	0.721984
GO:0008630	1.93406	0.293548	26	2	Chek2,Trp53	intrinsic apoptotic signaling pathway in response to DNA damage	0.721984
GO:0009948	1.93406	0.293548	26	2	Rnf2,Gdf3	anterior/posterior axis specification	0.721984
GO:0051100	1.93406	0.293548	26	2	Gtpbp4,Wapl	negative regulation of binding	0.721984
GO:0061035	1.93406	0.293548	26	2	Rarg,Ctgf	regulation of cartilage development	0.721984
GO:0007368	1.75737	0.298475	57	4	Nphp3,Ovol2,Rbpj,Gja1	determination of left/right symmetry	0.721984
GO:0060348	1.75737	0.298475	57	4	Rarg,Sulf1,Pex7,Fgf4	bone development	0.721984
GO:0009100	1.50418	0.305056	99	6	Sulf1,Phlda1,Porcn,Hs6st1,Fbxo6,Dpm1	glycoprotein metabolic process	0.721984
GO:0003281	1.85644	0.309095	27	2	Sall4,Sall1	ventricular septum development	0.721984
GO:0048741	1.85644	0.309095	27	2	Fbxo22,Dner	skeletal muscle fiber development	0.721984
GO:0046856	2.89671	0.317118	9	1	Mtmr7	phosphatidylinositol dephosphorylation	0.721984
GO:0001654	1.37411	0.318777	162	9	Rarg,Hdac2,Mterf4,Gdf3,Ift122,Vax2,Fzd5,Gja1,Rab18	eye development	0.721984
GO:0001541	1.78464	0.324572	28	2	Eif2b5,Eif2b4	ovarian follicle development	0.721984
GO:0006029	1.78464	0.324572	28	2	Sulf1,Hs6st1	proteoglycan metabolic process	0.721984
GO:0006200	1.78464	0.324572	28	2	Ddx3x,Clpx	ATP catabolic process	0.721984
GO:0008652	1.78464	0.324572	28	2	Cth,Mat2b	cellular amino acid biosynthetic process	0.721984
GO:0014904	1.78464	0.324572	28	2	Fbxo22,Dner	myotube cell development	0.721984
GO:0031532	1.78464	0.324572	28	2	Capn10,Baiap2l1	actin cytoskeleton reorganization	0.721984
GO:0032835	1.78464	0.324572	28	2	Nid1,Sulf1	glomerulus development	0.721984
GO:0042733	1.78464	0.324572	28	2	Hdac2,Ift122	embryonic digit morphogenesis	0.721984
GO:0060350	1.78464	0.324572	28	2	Rarg,Pex7	endochondral bone morphogenesis	0.721984
GO:0032869	1.60439	0.326413	62	4	Capn10,Zfp106,Eif4ebp1,Wdtc1	cellular response to insulin stimulus	0.721984
GO:0009855	1.57691	0.332651	63	4	Nphp3,Ovol2,Rbpj,Gja1	determination of bilateral symmetry	0.721984
GO:0005975	1.3927	0.33464	178	10	Mpdu1,Impa2,Dusp12,Gpd2,Impa1,Wdtc1,Mtmr7,Gckr,Acadm,Dpm1	carbohydrate metabolic process	0.721984
GO:0097193	1.55034	0.339076	64	4	Ddx3x,Chek2,Rnf7,Trp53	intrinsic apoptotic signaling pathway	0.721984
GO:0014032	1.71824	0.339959	29	2	Ovol2,Foxd3	neural crest cell development	0.721984
GO:0042632	1.71824	0.339959	29	2	Pla2g10,Nr1h2	cholesterol homeostasis	0.721984
GO:0048645	1.71824	0.339959	29	2	Sulf1,Rbpj	organ formation	0.721984
GO:2000177	1.71824	0.339959	29	2	Sall1,Trp53	regulation of neural precursor cell proliferation	0.721984
GO:0006111	2.57433	0.345481	10	1	Acadm	regulation of gluconeogenesis	0.721984
GO:0006626	2.57433	0.345481	10	1	Mterf4	protein targeting to mitochondrion	0.721984
GO:0006882	2.57433	0.345481	10	1	Mt2	cellular zinc ion homeostasis	0.721984
GO:0006900	2.57433	0.345481	10	1	Wasl	membrane budding	0.721984
GO:0008333	2.57433	0.345481	10	1	Snx16	endosome to lysosome transport	0.721984
GO:0009069	2.57433	0.345481	10	1	Cth	serine family amino acid metabolic process	0.721984
GO:0009124	2.57433	0.345481	10	1	Adss	nucleoside monophosphate biosynthetic process	0.721984
GO:0033146	2.57433	0.345481	10	1	Skp2	regulation of intracellular estrogen receptor signaling pathway	0.721984
GO:0035909	2.57433	0.345481	10	1	Rbpj	aorta morphogenesis	0.721984
GO:0040037	2.57433	0.345481	10	1	Sulf1	negative regulation of fibroblast growth factor receptor signaling pathway	0.721984
GO:0045777	2.57433	0.345481	10	1	Ace	positive regulation of blood pressure	0.721984
GO:0046839	2.57433	0.345481	10	1	Mtmr7	phospholipid dephosphorylation	0.721984
GO:0046902	2.57433	0.345481	10	1	Trp53	regulation of mitochondrial membrane permeability	0.721984
GO:0048260	2.57433	0.345481	10	1	Wasl	positive regulation of receptor-mediated endocytosis	0.721984
GO:0048485	2.57433	0.345481	10	1	Foxd3	sympathetic nervous system development	0.721984
GO:0048557	2.57433	0.345481	10	1	Ovol2	embryonic digestive tract morphogenesis	0.721984
GO:0048661	2.57433	0.345481	10	1	Sulf1	positive regulation of smooth muscle cell proliferation	0.721984
GO:0051443	2.57433	0.345481	10	1	Cdc14b	positive regulation of ubiquitin-protein ligase activity	0.721984
GO:0060045	2.57433	0.345481	10	1	Rbpj	positive regulation of cardiac muscle cell proliferation	0.721984
GO:0060351	2.57433	0.345481	10	1	Rarg	cartilage development involved in endochondral bone morphogenesis	0.721984
GO:0061337	2.57433	0.345481	10	1	Gja1	cardiac conduction	0.721984
GO:0070242	2.57433	0.345481	10	1	Trp53	thymocyte apoptotic process	0.721984
GO:0071158	2.57433	0.345481	10	1	Trp53	positive regulation of cell cycle arrest	0.721984
GO:0071174	2.57433	0.345481	10	1	Csnk2a2	mitotic cell cycle spindle checkpoint	0.721984
GO:2000178	2.57433	0.345481	10	1	Trp53	negative regulation of neural precursor cell proliferation	0.721984
GO:0014031	1.52464	0.345676	65	4	Ovol2,Rbpj,Gja1,Foxd3	mesenchymal cell development	0.721984
GO:0030177	1.65657	0.355238	30	2	Sulf1,Yap1	positive regulation of Wnt receptor signaling pathway	0.721984
GO:0030216	1.65657	0.355238	30	2	Rbpj,Yap1	keratinocyte differentiation	0.721984
GO:0032434	1.65657	0.355238	30	2	Fbxo22,Ubxn1	regulation of proteasomal ubiquitin-dependent protein catabolic process	0.721984
GO:0055092	1.65657	0.355238	30	2	Pla2g10,Nr1h2	sterol homeostasis	0.721984
GO:0090090	1.65657	0.355238	30	2	Hdac2,Nphp3	negative regulation of canonical Wnt receptor signaling pathway	0.721984
GO:0048477	1.59916	0.37039	31	2	Trip13,Piwil2	oogenesis	0.721984
GO:0060603	1.59916	0.37039	31	2	Etv5,Ncoa3	mammary gland duct morphogenesis	0.721984
GO:0001539	2.31689	0.37267	11	1	Dnaaf2	ciliary or flagellar motility	0.721984
GO:0001759	2.31689	0.37267	11	1	Rbpj	organ induction	0.721984
GO:0005978	2.31689	0.37267	11	1	Acadm	glycogen biosynthetic process	0.721984
GO:0006506	2.31689	0.37267	11	1	Dpm1	GPI anchor biosynthetic process	0.721984
GO:0006536	2.31689	0.37267	11	1	Atcay	glutamate metabolic process	0.721984
GO:0007031	2.31689	0.37267	11	1	Pex7	peroxisome organization	0.721984
GO:0007602	2.31689	0.37267	11	1	Cds2	phototransduction	0.721984
GO:0009950	2.31689	0.37267	11	1	Vax2	dorsal/ventral axis specification	0.721984
GO:0010822	2.31689	0.37267	11	1	Trp53	positive regulation of mitochondrion organization	0.721984
GO:0010828	2.31689	0.37267	11	1	Capn10	positive regulation of glucose transport	0.721984
GO:0015909	2.31689	0.37267	11	1	Pla2g10	long-chain fatty acid transport	0.721984
GO:0019430	2.31689	0.37267	11	1	Sod2	removal of superoxide radicals	0.721984
GO:0022408	2.31689	0.37267	11	1	Gtpbp4	negative regulation of cell-cell adhesion	0.721984
GO:0030540	2.31689	0.37267	11	1	Ncoa3	female genitalia development	0.721984
GO:0030857	2.31689	0.37267	11	1	Yap1	negative regulation of epithelial cell differentiation	0.721984
GO:0031503	2.31689	0.37267	11	1	Wasl	protein complex localization	0.721984
GO:0031623	2.31689	0.37267	11	1	Ulk1	receptor internalization	0.721984
GO:0034502	2.31689	0.37267	11	1	Wapl	protein localization to chromosome	0.721984
GO:0035329	2.31689	0.37267	11	1	Yap1	hippo signaling cascade	0.721984
GO:0042094	2.31689	0.37267	11	1	Clec2i	interleukin-2 biosynthetic process	0.721984
GO:0042304	2.31689	0.37267	11	1	Wdtc1	regulation of fatty acid biosynthetic process	0.721984
GO:0042554	2.31689	0.37267	11	1	Sod2	superoxide anion generation	0.721984
GO:0045429	2.31689	0.37267	11	1	Sod2	positive regulation of nitric oxide biosynthetic process	0.721984
GO:0045687	2.31689	0.37267	11	1	Hdac2	positive regulation of glial cell differentiation	0.721984
GO:0045747	2.31689	0.37267	11	1	Rbpj	positive regulation of Notch signaling pathway	0.721984
GO:0045879	2.31689	0.37267	11	1	Sall1	negative regulation of smoothened signaling pathway	0.721984
GO:0045931	2.31689	0.37267	11	1	Nanog	positive regulation of mitotic cell cycle	0.721984
GO:0048820	2.31689	0.37267	11	1	Rbpj	hair follicle maturation	0.721984
GO:0051646	2.31689	0.37267	11	1	Atcay	mitochondrion localization	0.721984
GO:0055069	2.31689	0.37267	11	1	Mt2	zinc ion homeostasis	0.721984
GO:0060004	2.31689	0.37267	11	1	Gja1	reflex	0.721984
GO:0060026	2.31689	0.37267	11	1	Zfp568	convergent extension	0.721984
GO:0060438	2.31689	0.37267	11	1	Rarg	trachea development	0.721984
GO:0060742	2.31689	0.37267	11	1	Wdr77	epithelial cell differentiation involved in prostate gland development	0.721984
GO:0070193	2.31689	0.37267	11	1	Trip13	synaptonemal complex organization	0.721984
GO:0070536	2.31689	0.37267	11	1	Usp33	protein K63-linked deubiquitination	0.721984
GO:0051216	1.57403	0.382876	79	5	Rarg,Sulf1,Ctgf,Fgf4,Foxd3	cartilage development	0.721984
GO:0043967	1.54557	0.385399	32	2	Yeats4,Wdr5	histone H4 acetylation	0.721984
GO:0060688	1.54557	0.385399	32	2	Etv5,Sulf1	regulation of morphogenesis of a branching structure	0.721984
GO:0061136	1.54557	0.385399	32	2	Fbxo22,Ubxn1	regulation of proteasomal protein catabolic process	0.721984
GO:0072001	1.39346	0.387825	142	8	Nid1,Sulf1,Ace,Sall1,Nphp3,Tet2,Aqp11,Foxd3	renal system development	0.721984
GO:0016311	1.37245	0.391796	144	8	Impa2,Ppp6r3,Dusp27,Dusp12,Impa1,Cdc14b,Mtmr7,Csrnp2	dephosphorylation	0.721984
GO:0043434	1.4922	0.395063	83	5	Eif2b5,Capn10,Zfp106,Eif4ebp1,Wdtc1	response to peptide hormone stimulus	0.721984
GO:0000002	2.10572	0.398734	12	1	Rnaseh1	mitochondrial genome maintenance	0.721984
GO:0000303	2.10572	0.398734	12	1	Sod2	response to superoxide	0.721984
GO:0001773	2.10572	0.398734	12	1	Ubd	myeloid dendritic cell activation	0.721984
GO:0002446	2.10572	0.398734	12	1	Ace	neutrophil mediated immunity	0.721984
GO:0006360	2.10572	0.398734	12	1	Rrn3	transcription from RNA polymerase I promoter	0.721984
GO:0006779	2.10572	0.398734	12	1	Cpox	porphyrin-containing compound biosynthetic process	0.721984
GO:0007029	2.10572	0.398734	12	1	Reep1	endoplasmic reticulum organization	0.721984
GO:0009303	2.10572	0.398734	12	1	Trp53	rRNA transcription	0.721984
GO:0010824	2.10572	0.398734	12	1	Chordc1	regulation of centrosome duplication	0.721984
GO:0010977	2.10572	0.398734	12	1	Hdac2	negative regulation of neuron projection development	0.721984
GO:0014015	2.10572	0.398734	12	1	Hdac2	positive regulation of gliogenesis	0.721984
GO:0015813	2.10572	0.398734	12	1	Slc25a13	L-glutamate transport	0.721984
GO:0016126	2.10572	0.398734	12	1	Ebp	sterol biosynthetic process	0.721984
GO:0016338	2.10572	0.398734	12	1	Cldn14	calcium-independent cell-cell adhesion	0.721984
GO:0017158	2.10572	0.398734	12	1	Pou5f1	regulation of calcium ion-dependent exocytosis	0.721984
GO:0021697	2.10572	0.398734	12	1	Ulk1	cerebellar cortex formation	0.721984
GO:0021904	2.10572	0.398734	12	1	Ift122	dorsal/ventral neural tube patterning	0.721984
GO:0032091	2.10572	0.398734	12	1	Gtpbp4	negative regulation of protein binding	0.721984
GO:0032728	2.10572	0.398734	12	1	Polr3g	positive regulation of interferon-beta production	0.721984
GO:0043984	2.10572	0.398734	12	1	Wdr5	histone H4-K16 acetylation	0.721984
GO:0048070	2.10572	0.398734	12	1	Gna11	regulation of developmental pigmentation	0.721984
GO:0048384	2.10572	0.398734	12	1	Rarg	retinoic acid receptor signaling pathway	0.721984
GO:0048821	2.10572	0.398734	12	1	Klf2	erythrocyte development	0.721984
GO:0051351	2.10572	0.398734	12	1	Cdc14b	positive regulation of ligase activity	0.721984
GO:0071156	2.10572	0.398734	12	1	Trp53	regulation of cell cycle arrest	0.721984
GO:0072132	2.10572	0.398734	12	1	Rbpj	mesenchyme morphogenesis	0.721984
GO:0090162	2.10572	0.398734	12	1	Gja1	establishment of epithelial cell polarity	0.721984
GO:0014033	1.49545	0.400253	33	2	Ovol2,Foxd3	neural crest cell differentiation	0.721984
GO:0017015	1.49545	0.400253	33	2	Eid2,Trp53	regulation of transforming growth factor beta receptor signaling pathway	0.721984
GO:0032273	1.49545	0.400253	33	2	Wasl,Baiap2l1	positive regulation of protein polymerization	0.721984
GO:0060675	1.49545	0.400253	33	2	Sall1,Foxd3	ureteric bud morphogenesis	0.721984
GO:0007369	1.45436	0.402361	85	5	Nanog,Pou5f1,Rnf2,Gdf3,Trp53	gastrulation	0.721984
GO:0033365	1.34692	0.423039	165	9	Folr1,Pex7,Sumo1,Mterf4,Snx16,Dnajb6,Wapl,Gckr,Trp53	protein localization to organelle	0.721984
GO:0000305	1.93003	0.42372	13	1	Sod2	response to oxygen radical	0.721984
GO:0006352	1.93003	0.42372	13	1	Rrn3	DNA-dependent transcription, initiation	0.721984
GO:0006400	1.93003	0.42372	13	1	Wdr4	tRNA modification	0.721984
GO:0006505	1.93003	0.42372	13	1	Dpm1	GPI anchor metabolic process	0.721984
GO:0007041	1.93003	0.42372	13	1	Snx16	lysosomal transport	0.721984
GO:0007141	1.93003	0.42372	13	1	Trip13	male meiosis I	0.721984
GO:0007212	1.93003	0.42372	13	1	Gna11	dopamine receptor signaling pathway	0.721984
GO:0009311	1.93003	0.42372	13	1	Mpdu1	oligosaccharide metabolic process	0.721984
GO:0009409	1.93003	0.42372	13	1	Acadm	response to cold	0.721984
GO:0010165	1.93003	0.42372	13	1	Trp53	response to X-ray	0.721984
GO:0021533	1.93003	0.42372	13	1	Ulk1	cell differentiation in hindbrain	0.721984
GO:0034605	1.93003	0.42372	13	1	St8sia1	cellular response to heat	0.721984
GO:0042168	1.93003	0.42372	13	1	Cpox	heme metabolic process	0.721984
GO:0045022	1.93003	0.42372	13	1	Snx16	early endosome to late endosome transport	0.721984
GO:0046068	1.93003	0.42372	13	1	Nppb	cGMP metabolic process	0.721984
GO:0046605	1.93003	0.42372	13	1	Chordc1	regulation of centrosome cycle	0.721984
GO:0048011	1.93003	0.42372	13	1	Ulk1	nerve growth factor receptor signaling pathway	0.721984
GO:0048713	1.93003	0.42372	13	1	Hdac2	regulation of oligodendrocyte differentiation	0.721984
GO:0051489	1.93003	0.42372	13	1	Wasl	regulation of filopodium assembly	0.721984
GO:0051983	1.93003	0.42372	13	1	Wapl	regulation of chromosome segregation	0.721984
GO:0061001	1.93003	0.42372	13	1	Caprin2	regulation of dendritic spine morphogenesis	0.721984
GO:0090398	1.93003	0.42372	13	1	Pnpt1	cellular senescence	0.721984
GO:0097028	1.93003	0.42372	13	1	Ubd	dendritic cell differentiation	0.721984
GO:0008064	1.74303	0.424012	43	3	Wasl,Clec2i,Baiap2l1	regulation of actin polymerization or depolymerization	0.721984
GO:0006396	1.32076	0.427671	168	9	Rnmt,Pnpt1,Cdc5l,Wdr4,Sbds,Clp1,Piwil2,Rbm17,Rbm20	RNA processing	0.721984
GO:0030832	1.70021	0.428675	44	3	Wasl,Clec2i,Baiap2l1	regulation of actin filament length	0.721984
GO:0007033	1.65943	0.433667	45	3	Atg13,Ulk1,Wdr45	vacuole organization	0.721984
GO:0009798	1.65943	0.433667	45	3	Rnf2,Gdf3,Vax2	axis specification	0.721984
GO:0006914	1.62054	0.438965	46	3	Atg13,Ulk1,Wdr45	autophagy	0.721984
GO:0007243	1.62054	0.438965	46	3	Ddx3x,Gna13,Oxsr1	intracellular protein kinase cascade	0.721984
GO:0016202	1.58342	0.444546	47	3	Fbxo22,Rbpj,Gja1	regulation of striated muscle tissue development	0.721984
GO:0003197	1.78126	0.447671	14	1	Rbpj	endocardial cushion development	0.721984
GO:0006766	1.78126	0.447671	14	1	Folr1	vitamin metabolic process	0.721984
GO:0007032	1.78126	0.447671	14	1	Aqp11	endosome organization	0.721984
GO:0009247	1.78126	0.447671	14	1	Dpm1	glycolipid biosynthetic process	0.721984
GO:0009262	1.78126	0.447671	14	1	Nudt1	deoxyribonucleotide metabolic process	0.721984
GO:0009583	1.78126	0.447671	14	1	Cds2	detection of light stimulus	0.721984
GO:0030166	1.78126	0.447671	14	1	Hs6st1	proteoglycan biosynthetic process	0.721984
GO:0043666	1.78126	0.447671	14	1	Ppp6r3	regulation of phosphoprotein phosphatase activity	0.721984
GO:0060043	1.78126	0.447671	14	1	Rbpj	regulation of cardiac muscle cell proliferation	0.721984
GO:0060706	1.78126	0.447671	14	1	Erf	cell differentiation involved in embryonic placenta development	0.721984
GO:0070232	1.78126	0.447671	14	1	Trp53	regulation of T cell apoptotic process	0.721984
GO:0030509	1.54795	0.450389	48	3	Nanog,Sulf1,Rbpj	BMP signaling pathway	0.721984
GO:0048705	1.38298	0.455395	107	6	Rarg,Sulf1,Ctgf,Pex7,Ryk,Fgf4	skeletal system morphogenesis	0.721984
GO:0001508	1.51402	0.456472	49	3	Eif2b5,Eif2b4,Gna11	regulation of action potential	0.721984
GO:0009953	1.51402	0.456472	49	3	Ift122,Vax2,Ovol2	dorsal/ventral pattern formation	0.721984
GO:0043473	1.51402	0.456472	49	3	Sod2,Gna11,Foxd3	pigmentation	0.721984
GO:0060828	1.51402	0.456472	49	3	Hdac2,Nphp3,Yap1	regulation of canonical Wnt receptor signaling pathway	0.721984
GO:0007286	1.48154	0.462776	50	3	Trip13,Agfg1,Kdm3a	spermatid development	0.721984
GO:0008217	1.48154	0.462776	50	3	Sod2,Ace,Agtrap	regulation of blood pressure	0.721984
GO:0030010	1.48154	0.462776	50	3	Gja1,Dynlt1a,Dynlt1f	establishment of cell polarity	0.721984
GO:0055114	1.32931	0.466279	111	6	Sod2,Slc25a13,Pex7,Pnpt1,Mtfr1,Acadm	oxidation-reduction process	0.721984
GO:0000413	1.65374	0.470632	15	1	Ppid	protein peptidyl-prolyl isomerization	0.721984
GO:0006885	1.65374	0.470632	15	1	Aqp11	regulation of pH	0.721984
GO:0007143	1.65374	0.470632	15	1	Trip13	female meiosis	0.721984
GO:0031577	1.65374	0.470632	15	1	Csnk2a2	spindle checkpoint	0.721984
GO:0035136	1.65374	0.470632	15	1	Sall1	forelimb morphogenesis	0.721984
GO:0042771	1.65374	0.470632	15	1	Trp53	intrinsic apoptotic signaling pathway in response to DNA damage by p53 class mediator	0.721984
GO:0043981	1.65374	0.470632	15	1	Wdr5	histone H4-K5 acetylation	0.721984
GO:0043982	1.65374	0.470632	15	1	Wdr5	histone H4-K8 acetylation	0.721984
GO:0044070	1.65374	0.470632	15	1	Pla2g10	regulation of anion transport	0.721984
GO:0045600	1.65374	0.470632	15	1	Aamdc	positive regulation of fat cell differentiation	0.721984
GO:0048660	1.65374	0.470632	15	1	Sulf1	regulation of smooth muscle cell proliferation	0.721984
GO:0048678	1.65374	0.470632	15	1	Sod2	response to axon injury	0.721984
GO:0051055	1.65374	0.470632	15	1	Wdtc1	negative regulation of lipid biosynthetic process	0.721984
GO:0072210	1.65374	0.470632	15	1	Sall1	metanephric nephron development	0.721984
GO:0072384	1.65374	0.470632	15	1	Hap1	organelle transport along microtubule	0.721984
GO:0048515	1.39189	0.482821	53	3	Trip13,Agfg1,Kdm3a	spermatid differentiation	0.721984
GO:0050770	1.39189	0.482821	53	3	Ttl,Ulk1,Ryk	regulation of axonogenesis	0.721984
GO:0000271	1.54322	0.492641	16	1	Acadm	polysaccharide biosynthetic process	0.721984
GO:0006378	1.54322	0.492641	16	1	Pnpt1	mRNA polyadenylation	0.721984
GO:0006414	1.54322	0.492641	16	1	Gfm1	translational elongation	0.721984
GO:0006493	1.54322	0.492641	16	1	Dpm1	protein O-linked glycosylation	0.721984
GO:0007034	1.54322	0.492641	16	1	Snx16	vacuolar transport	0.721984
GO:0007189	1.54322	0.492641	16	1	Gna13	adenylate cyclase-activating G-protein coupled receptor signaling pathway	0.721984
GO:0009593	1.54322	0.492641	16	1	Sod2	detection of chemical stimulus	0.721984
GO:0010092	1.54322	0.492641	16	1	Rbpj	specification of organ identity	0.721984
GO:0010883	1.54322	0.492641	16	1	Nr1h2	regulation of lipid storage	0.721984
GO:0021522	1.54322	0.492641	16	1	Abt1	spinal cord motor neuron differentiation	0.721984
GO:0030279	1.54322	0.492641	16	1	Rbpj	negative regulation of ossification	0.721984
GO:0030317	1.54322	0.492641	16	1	Dnaja1	sperm motility	0.721984
GO:0030514	1.54322	0.492641	16	1	Nanog	negative regulation of BMP signaling pathway	0.721984
GO:0046850	1.54322	0.492641	16	1	Gja1	regulation of bone remodeling	0.721984
GO:0048169	1.54322	0.492641	16	1	Syngr1	regulation of long-term neuronal synaptic plasticity	0.721984
GO:0048659	1.54322	0.492641	16	1	Sulf1	smooth muscle cell proliferation	0.721984
GO:0051438	1.54322	0.492641	16	1	Cdc14b	regulation of ubiquitin-protein ligase activity	0.721984
GO:0051881	1.54322	0.492641	16	1	Sod2	regulation of mitochondrial membrane potential	0.721984
GO:0060997	1.54322	0.492641	16	1	Caprin2	dendritic spine morphogenesis	0.721984
GO:0097006	1.54322	0.492641	16	1	Nr1h2	regulation of plasma lipoprotein particle levels	0.721984
GO:2000108	1.54322	0.492641	16	1	Trp53	positive regulation of leukocyte apoptotic process	0.721984
GO:0008154	1.33788	0.496955	55	3	Wasl,Clec2i,Baiap2l1	actin polymerization or depolymerization	0.721984
GO:0040013	1.33788	0.496955	55	3	Sulf1,Gtpbp4,Ryk	negative regulation of locomotion	0.721984
GO:0009913	1.28786	0.511558	57	3	Hdac2,Rbpj,Yap1	epidermal cell differentiation	0.721984
GO:0000096	1.44652	0.51374	17	1	Cth	sulfur amino acid metabolic process	0.721984
GO:0006509	1.44652	0.51374	17	1	Adam19	membrane protein ectodomain proteolysis	0.721984
GO:0019217	1.44652	0.51374	17	1	Wdtc1	regulation of fatty acid metabolic process	0.721984
GO:0021772	1.44652	0.51374	17	1	Sall1	olfactory bulb development	0.721984
GO:0032481	1.44652	0.51374	17	1	Polr3g	positive regulation of type I interferon production	0.721984
GO:0032648	1.44652	0.51374	17	1	Polr3g	regulation of interferon-beta production	0.721984
GO:0045104	1.44652	0.51374	17	1	Agfg1	intermediate filament cytoskeleton organization	0.721984
GO:0045428	1.44652	0.51374	17	1	Sod2	regulation of nitric oxide biosynthetic process	0.721984
GO:0046677	1.44652	0.51374	17	1	Ppp2cb	response to antibiotic	0.721984
GO:0048536	1.44652	0.51374	17	1	Jarid2	spleen development	0.721984
GO:0048566	1.44652	0.51374	17	1	Ovol2	embryonic digestive tract development	0.721984
GO:0048599	1.44652	0.51374	17	1	Trip13	oocyte development	0.721984
GO:0048742	1.44652	0.51374	17	1	Fbxo22	regulation of skeletal muscle fiber development	0.721984
GO:0055024	1.44652	0.51374	17	1	Rbpj	regulation of cardiac muscle tissue development	0.721984
GO:0060420	1.44652	0.51374	17	1	Rbpj	regulation of heart growth	0.721984
GO:0060998	1.44652	0.51374	17	1	Caprin2	regulation of dendritic spine development	0.721984
GO:0072332	1.44652	0.51374	17	1	Trp53	intrinsic apoptotic signaling pathway by p53 class mediator	0.721984
GO:0000578	1.36121	0.533964	18	1	Gdf3	embryonic axis specification	0.722637
GO:0001958	1.36121	0.533964	18	1	Pex7	endochondral ossification	0.722637
GO:0006308	1.36121	0.533964	18	1	Xrn2	DNA catabolic process	0.722637
GO:0006778	1.36121	0.533964	18	1	Cpox	porphyrin-containing compound metabolic process	0.722637
GO:0007052	1.36121	0.533964	18	1	Chek2	mitotic spindle organization	0.722637
GO:0009994	1.36121	0.533964	18	1	Trip13	oocyte differentiation	0.722637
GO:0010506	1.36121	0.533964	18	1	Ulk1	regulation of autophagy	0.722637
GO:0021983	1.36121	0.533964	18	1	Rbpj	pituitary gland development	0.722637
GO:0021988	1.36121	0.533964	18	1	Sall1	olfactory lobe development	0.722637
GO:0031333	1.36121	0.533964	18	1	Ddx3x	negative regulation of protein complex assembly	0.722637
GO:0043154	1.36121	0.533964	18	1	Ddx3x	negative regulation of cysteine-type endopeptidase activity involved in apoptotic process	0.722637
GO:0043631	1.36121	0.533964	18	1	Pnpt1	RNA polyadenylation	0.722637
GO:0045103	1.36121	0.533964	18	1	Agfg1	intermediate filament-based process	0.722637
GO:0048146	1.36121	0.533964	18	1	Fntb	positive regulation of fibroblast proliferation	0.722637
GO:2000117	1.36121	0.533964	18	1	Ddx3x	negative regulation of cysteine-type endopeptidase activity	0.722637
GO:0008380	1.38658	0.539231	71	4	Cdc5l,Clp1,Rbm17,Rbm20	RNA splicing	0.722637
GO:0048762	1.38658	0.539231	71	4	Ovol2,Rbpj,Gja1,Foxd3	mesenchymal cell differentiation	0.722637
GO:0032868	1.36594	0.542466	72	4	Capn10,Zfp106,Eif4ebp1,Wdtc1	response to insulin stimulus	0.722637
GO:0001101	1.32644	0.549471	74	4	Nanog,Dnaaf2,Pou5f1,Scamp3	response to acid	0.722637
GO:0045786	1.32644	0.549471	74	4	Pnpt1,Cdk5rap1,Ticrr,Trp53	negative regulation of cell cycle	0.722637
GO:0007163	1.30751	0.553222	75	4	Atn1,Gja1,Dynlt1a,Dynlt1f	establishment or maintenance of cell polarity	0.722637
GO:0042176	1.30751	0.553222	75	4	Ubxn2a,Chek2,Fbxo22,Ubxn1	regulation of protein catabolic process	0.722637
GO:0003401	1.28537	0.553351	19	1	Zfp568	axis elongation	0.722637
GO:0007200	1.28537	0.553351	19	1	Gna11	phospholipase C-activating G-protein coupled receptor signaling pathway	0.722637
GO:0015908	1.28537	0.553351	19	1	Pla2g10	fatty acid transport	0.722637
GO:0017145	1.28537	0.553351	19	1	Nanog	stem cell division	0.722637
GO:0021696	1.28537	0.553351	19	1	Ulk1	cerebellar cortex morphogenesis	0.722637
GO:0031572	1.28537	0.553351	19	1	Cdc14b	G2/M transition DNA damage checkpoint	0.722637
GO:0032436	1.28537	0.553351	19	1	Fbxo22	positive regulation of proteasomal ubiquitin-dependent protein catabolic process	0.722637
GO:0032608	1.28537	0.553351	19	1	Polr3g	interferon-beta production	0.722637
GO:0032633	1.28537	0.553351	19	1	Rbpj	interleukin-4 production	0.722637
GO:0042311	1.28537	0.553351	19	1	Sod2	vasodilation	0.722637
GO:0046847	1.28537	0.553351	19	1	Wasl	filopodium assembly	0.722637
GO:0048708	1.28537	0.553351	19	1	Eif2b5	astrocyte differentiation	0.722637
GO:0051298	1.28537	0.553351	19	1	Chordc1	centrosome duplication	0.722637
GO:0060071	1.28537	0.553351	19	1	Nphp3	Wnt receptor signaling pathway, planar cell polarity pathway	0.722637
GO:0090175	1.28537	0.553351	19	1	Nphp3	regulation of establishment of planar polarity	0.722637
GO:0009791	1.27122	0.561175	77	4	Sod2,Tet2,Fzd5,Acadm	post-embryonic development	0.723392
GO:2000027	1.23686	0.569669	79	4	Etv5,Sulf1,Nphp3,Rbpj	regulation of organ morphogenesis	0.723392
GO:0006289	1.21751	0.571935	20	1	Trp53	nucleotide-excision repair	0.723392
GO:0006720	1.21751	0.571935	20	1	Dpm1	isoprenoid metabolic process	0.723392
GO:0007030	1.21751	0.571935	20	1	l7Rn6	Golgi organization	0.723392
GO:0007586	1.21751	0.571935	20	1	Nr1h2	digestion	0.723392
GO:0021532	1.21751	0.571935	20	1	Ift122	neural tube patterning	0.723392
GO:0030330	1.21751	0.571935	20	1	Trp53	DNA damage response, signal transduction by p53 class mediator	0.723392
GO:0040036	1.21751	0.571935	20	1	Sulf1	regulation of fibroblast growth factor receptor signaling pathway	0.723392
GO:0042177	1.21751	0.571935	20	1	Ubxn1	negative regulation of protein catabolic process	0.723392
GO:0042491	1.21751	0.571935	20	1	Rbpj	auditory receptor cell differentiation	0.723392
GO:0043525	1.21751	0.571935	20	1	Trp53	positive regulation of neuron apoptotic process	0.723392
GO:0045833	1.21751	0.571935	20	1	Wdtc1	negative regulation of lipid metabolic process	0.723392
GO:0046148	1.21751	0.571935	20	1	Cpox	pigment biosynthetic process	0.723392
GO:0050658	1.21751	0.571935	20	1	Pnpt1	RNA transport	0.723392
GO:0051568	1.21751	0.571935	20	1	Wdr5	histone H3-K4 methylation	0.723392
GO:0090263	1.21751	0.571935	20	1	Yap1	positive regulation of canonical Wnt receptor signaling pathway	0.723392
GO:0001841	1.22036	0.574098	80	4	Sall4,Ift122,Sall1,Ovol2	neural tube formation	0.723543
GO:0030111	1.20429	0.578637	81	4	Sulf1,Hdac2,Nphp3,Yap1	regulation of Wnt receptor signaling pathway	0.723543
GO:0022612	1.18863	0.583279	82	4	Rarg,Etv5,Sulf1,Ncoa3	gland morphogenesis	0.723543
GO:0002011	1.15643	0.589749	21	1	Zfp568	morphogenesis of an epithelial sheet	0.723543
GO:0006637	1.15643	0.589749	21	1	Acot8	acyl-CoA metabolic process	0.723543
GO:0006888	1.15643	0.589749	21	1	Yipf5	ER to Golgi vesicle-mediated transport	0.723543
GO:0008593	1.15643	0.589749	21	1	Rbpj	regulation of Notch signaling pathway	0.723543
GO:0030048	1.15643	0.589749	21	1	Wasl	actin filament-based movement	0.723543
GO:0033619	1.15643	0.589749	21	1	Adam19	membrane protein proteolysis	0.723543
GO:0034341	1.15643	0.589749	21	1	Ubd	response to interferon-gamma	0.723543
GO:0035567	1.15643	0.589749	21	1	Nphp3	non-canonical Wnt receptor signaling pathway	0.723543
GO:0043467	1.15643	0.589749	21	1	Pnpt1	regulation of generation of precursor metabolites and energy	0.723543
GO:0046324	1.15643	0.589749	21	1	Capn10	regulation of glucose import	0.723543
GO:0048168	1.15643	0.589749	21	1	Syngr1	regulation of neuronal synaptic plasticity	0.723543
GO:0060996	1.15643	0.589749	21	1	Caprin2	dendritic spine development	0.723543
GO:1901216	1.15643	0.589749	21	1	Trp53	positive regulation of neuron death	0.723543
GO:0035264	1.23455	0.606583	99	5	Rarg,Ncoa3,Wdtc1,Klf2,Trp53	multicellular organism growth	0.723543
GO:0007098	1.10117	0.606824	22	1	Chordc1	centrosome cycle	0.723543
GO:0007131	1.10117	0.606824	22	1	Trip13	reciprocal meiotic recombination	0.723543
GO:0021517	1.10117	0.606824	22	1	Abt1	ventral spinal cord development	0.723543
GO:0032088	1.10117	0.606824	22	1	Setd6	negative regulation of NF-kappaB transcription factor activity	0.723543
GO:0045446	1.10117	0.606824	22	1	Rbpj	endothelial cell differentiation	0.723543
GO:0045599	1.10117	0.606824	22	1	Sod2	negative regulation of fat cell differentiation	0.723543
GO:0046323	1.10117	0.606824	22	1	Capn10	glucose import	0.723543
GO:0046580	1.10117	0.606824	22	1	Rasal2	negative regulation of Ras protein signal transduction	0.723543
GO:0048010	1.10117	0.606824	22	1	Sulf1	vascular endothelial growth factor receptor signaling pathway	0.723543
GO:0048483	1.10117	0.606824	22	1	Foxd3	autonomic nervous system development	0.723543
GO:0055072	1.10117	0.606824	22	1	Sod2	iron ion homeostasis	0.723543
GO:0070979	1.10117	0.606824	22	1	Anapc10	protein K11-linked ubiquitination	0.723543
GO:0061448	1.18328	0.617758	103	5	Rarg,Sulf1,Ctgf,Fgf4,Foxd3	connective tissue development	0.723543
GO:0030324	1.1711	0.620813	104	5	Ctgf,Hs6st1,Dppa4,l7Rn6,Dppa2	lung development	0.723543
GO:0045165	1.1711	0.620813	104	5	Nanog,Pou5f1,Sall1,Rbpj,Trp53	cell fate commitment	0.723543
GO:0001936	1.05095	0.623192	23	1	Sulf1	regulation of endothelial cell proliferation	0.723543
GO:0002437	1.05095	0.623192	23	1	Rbpj	inflammatory response to antigenic stimulus	0.723543
GO:0005977	1.05095	0.623192	23	1	Acadm	glycogen metabolic process	0.723543
GO:0006364	1.05095	0.623192	23	1	Sbds	rRNA processing	0.723543
GO:0006403	1.05095	0.623192	23	1	Pnpt1	RNA localization	0.723543
GO:0006661	1.05095	0.623192	23	1	Dpm1	phosphatidylinositol biosynthetic process	0.723543
GO:0006801	1.05095	0.623192	23	1	Sod2	superoxide metabolic process	0.723543
GO:0007006	1.05095	0.623192	23	1	Trp53	mitochondrial membrane organization	0.723543
GO:0007229	1.05095	0.623192	23	1	Ctgf	integrin-mediated signaling pathway	0.723543
GO:0016525	1.05095	0.623192	23	1	Sulf1	negative regulation of angiogenesis	0.723543
GO:0035315	1.05095	0.623192	23	1	Rbpj	hair cell differentiation	0.723543
GO:0045685	1.05095	0.623192	23	1	Hdac2	regulation of glial cell differentiation	0.723543
GO:0048538	1.05095	0.623192	23	1	Jarid2	thymus development	0.723543
GO:0048641	1.05095	0.623192	23	1	Fbxo22	regulation of skeletal muscle tissue development	0.723543
GO:0048814	1.05095	0.623192	23	1	Caprin2	regulation of dendrite morphogenesis	0.723543
GO:0060038	1.05095	0.623192	23	1	Rbpj	cardiac muscle cell proliferation	0.723543
GO:0010975	1.15918	0.623963	105	5	Hdac2,Ttl,Ulk1,Caprin2,Ryk	regulation of neuron projection development	0.723543
GO:0060541	1.2223	0.63907	120	6	Rarg,Ctgf,Hs6st1,Dppa4,l7Rn6,Dppa2	respiratory system development	0.739805
GO:0016055	1.17998	0.64616	124	6	Sulf1,Hdac2,Ryk,Nphp3,Fzd5,Yap1	Wnt receptor signaling pathway	0.746747
GO:0003073	1.44846	0.650857	34	2	Sod2,Ace	regulation of systemic arterial blood pressure	0.748376
GO:0003279	1.44846	0.650857	34	2	Sall4,Sall1	cardiac septum development	0.748376
GO:0007162	1.44846	0.650857	34	2	Gtpbp4,Cml2	negative regulation of cell adhesion	0.748376
GO:0031344	1.15008	0.652458	127	6	Hdac2,Ttl,Ulk1,Wasl,Caprin2,Ryk	regulation of cell projection organization	0.748956
GO:0009880	1.40432	0.655518	35	2	Nanog,Gdf3	embryonic pattern specification	0.749948
GO:0031398	1.40432	0.655518	35	2	Fbxo22,Cdc14b	positive regulation of protein ubiquitination	0.749948
GO:0001707	1.32361	0.665468	37	2	Nanog,Pou5f1	mesoderm formation	0.755818
GO:0010951	1.32361	0.665468	37	2	Ddx3x,Serpini1	negative regulation of endopeptidase activity	0.755818
GO:0035272	1.32361	0.665468	37	2	Rarg,Tfcp2l1	exocrine system development	0.755818
GO:0048747	1.32361	0.665468	37	2	Fbxo22,Dner	muscle fiber development	0.755818
GO:0001837	1.28661	0.670706	38	2	Rbpj,Gja1	epithelial to mesenchymal transition	0.755818
GO:0042475	1.28661	0.670706	38	2	Hdac2,Fgf4	odontogenesis of dentin-containing tooth	0.755818
GO:0046620	1.28661	0.670706	38	2	Rbpj,Yap1	regulation of organ growth	0.755818
GO:0050680	1.28661	0.670706	38	2	Wdr77,Sulf1	negative regulation of epithelial cell proliferation	0.755818
GO:0006605	1.16059	0.672605	147	7	Folr1,Pex7,Syngr1,Mterf4,Snx16,Gckr,Trp53	protein targeting	0.755818
GO:0022604	1.16059	0.672605	147	7	Gna13,Ttl,Ulk1,Caprin2,Cfdp1,Ryk,Zmym4	regulation of cell morphogenesis	0.755818
GO:0006898	1.25161	0.676089	39	2	Ulk1,Wasl	receptor-mediated endocytosis	0.755818
GO:0007050	1.25161	0.676089	39	2	Pnpt1,Trp53	cell cycle arrest	0.755818
GO:0022602	1.25161	0.676089	39	2	Eif2b5,Eif2b4	ovulation cycle process	0.755818
GO:0009314	1.13559	0.67727	150	7	Sod2,Chek2,Bcat1,Ticrr,Yap1,Cds2,Trp53	response to radiation	0.755818
GO:0010466	1.21845	0.681596	40	2	Ddx3x,Serpini1	negative regulation of peptidase activity	0.755818
GO:0044242	1.21845	0.681596	40	2	Pex7,Acadm	cellular lipid catabolic process	0.755818
GO:0048332	1.21845	0.681596	40	2	Nanog,Pou5f1	mesoderm morphogenesis	0.755818
GO:0007186	1.10385	0.68448	154	7	Gna13,Usp33,Gna11,Oxgr1,Htr1d,Dynlt1a,Dynlt1f	G-protein coupled receptor signaling pathway	0.755818
GO:0000302	1.18699	0.687208	41	2	Sod2,Ppp2cb	response to reactive oxygen species	0.755818
GO:0006164	1.18699	0.687208	41	2	Adss,Nppb	purine nucleotide biosynthetic process	0.755818
GO:0030856	1.18699	0.687208	41	2	Gna11,Yap1	regulation of epithelial cell differentiation	0.755818
GO:0042698	1.18699	0.687208	41	2	Eif2b5,Eif2b4	ovulation cycle	0.755818
GO:0043280	1.18699	0.687208	41	2	Ddx3x,Rnf7	positive regulation of cysteine-type endopeptidase activity involved in apoptotic process	0.755818
GO:0060443	1.18699	0.687208	41	2	Etv5,Ncoa3	mammary gland morphogenesis	0.755818
GO:0043433	1.15711	0.692906	42	2	Pla2g10,Setd6	negative regulation of sequence-specific DNA binding transcription factor activity	0.757208
GO:0051495	1.15711	0.692906	42	2	Wasl,Baiap2l1	positive regulation of cytoskeleton organization	0.757208
GO:0055088	1.15711	0.692906	42	2	Pla2g10,Nr1h2	lipid homeostasis	0.757208
GO:2001056	1.15711	0.692906	42	2	Ddx3x,Rnf7	positive regulation of cysteine-type endopeptidase activity	0.757208
GO:0008286	1.12868	0.698673	43	2	Zfp106,Eif4ebp1	insulin receptor signaling pathway	0.759863
GO:0043123	1.12868	0.698673	43	2	Cth,Ubd	positive regulation of I-kappaB kinase/NF-kappaB cascade	0.759863
GO:0045995	1.12868	0.698673	43	2	Nanog,Sulf1	regulation of embryonic development	0.759863
GO:0010950	1.1016	0.704495	44	2	Ddx3x,Rnf7	positive regulation of endopeptidase activity	0.761345
GO:0045598	1.1016	0.704495	44	2	Sod2,Aamdc	regulation of fat cell differentiation	0.761345
GO:0046488	1.1016	0.704495	44	2	Mtmr7,Dpm1	phosphatidylinositol metabolic process	0.761345
GO:0090068	1.1016	0.704495	44	2	Ddx3x,Trp53	positive regulation of cell cycle process	0.761345
GO:0006518	1.07577	0.710355	45	2	Sod2,Gstp2	peptide metabolic process	0.766465
GO:0008643	1.05117	0.716242	46	2	Capn10,Slc23a2	carbohydrate transport	0.771598
GO:0030336	1.02761	0.722143	47	2	Sulf1,Gtpbp4	negative regulation of cell migration	0.775509
GO:0031334	1.02761	0.722143	47	2	Wasl,Baiap2l1	positive regulation of protein complex assembly	0.775509
GO:0003231	1.26421	0.733681	58	3	Sall4,Sall1,Rbpj	cardiac ventricle development	0.786663
GO:0070613	1.24141	0.735787	59	3	Fbxo22,Nr1h2,Ubxn1	regulation of protein processing	0.787684
GO:0072089	1.2194	0.738032	60	3	Yap1,Trp53,Dppa2	stem cell proliferation	0.788851
GO:0045927	1.19816	0.740407	61	3	Ddx3x,Tfcp2l1,Yap1	positive regulation of growth	0.78892
GO:0061351	1.19816	0.740407	61	3	Sall1,Melk,Trp53	neural precursor cell proliferation	0.78892
GO:0001843	1.15779	0.745511	63	3	Sall4,Ift122,Sall1	neural tube closure	0.791888
GO:0060606	1.15779	0.745511	63	3	Sall4,Ift122,Sall1	tube closure	0.791888
GO:0051258	1.08461	0.756911	67	3	Wasl,Clec2i,Baiap2l1	protein polymerization	0.802749
GO:0007519	1.06771	0.759965	68	3	Mylpf,Fbxo22,Dner	skeletal muscle tissue development	0.803493
GO:0060538	1.06771	0.759965	68	3	Mylpf,Fbxo22,Dner	skeletal muscle organ development	0.803493
GO:0048592	1.02008	0.769507	71	3	Rarg,Ift122,Vax2	eye morphogenesis	0.812324
GO:0060070	1.17336	0.777393	83	4	Hdac2,Nphp3,Fzd5,Yap1	canonical Wnt receptor signaling pathway	0.819382
GO:0072657	1.14397	0.780175	85	4	Folr1,Etv5,Ift122,Clec2i	protein localization to membrane	0.821047
GO:0010035	1.11599	0.783298	87	4	Sod2,Ppp2cb,Slc25a13,Mt2	response to inorganic substance	0.822874
GO:0001838	1.0893	0.78673	89	4	Sall4,Ift122,Sall1,Ovol2	embryonic epithelial tube formation	0.822874
GO:0010769	1.0893	0.78673	89	4	Ttl,Ulk1,Caprin2,Ryk	regulation of cell morphogenesis involved in differentiation	0.822874
GO:0050678	1.0893	0.78673	89	4	Wdr77,Sulf1,Ovol2,Yap1	regulation of epithelial cell proliferation	0.822874
GO:0072175	1.07643	0.788552	90	4	Sall4,Ift122,Sall1,Ovol2	epithelial tube formation	0.823518
GO:0007411	1.06392	0.790439	91	4	Pla2g10,Usp33,Ryk,Foxd3	axon guidance	0.824229
GO:0010638	1.01636	0.798569	95	4	Wasl,Jarid2,Baiap2l1,Trp53	positive regulation of organelle organization	0.82891
GO:0015711	1.01636	0.798569	95	4	Folr1,Slc25a13,Pla2g10,Slc23a2	organic anion transport	0.82891
GO:0035148	1.01636	0.798569	95	4	Sall4,Ift122,Sall1,Ovol2	tube formation	0.82891
GO:0030323	1.13602	0.803832	107	5	Ctgf,Hs6st1,Dppa4,l7Rn6,Dppa2	respiratory tube development	0.833106
GO:0016337	1.10339	0.823183	132	6	Sulf1,Ctgf,Gtpbp4,Dnajb6,Erf,Fgf4	cell-cell adhesion	0.85187
GO:0016485	1.0771	0.825512	135	6	Vps35,Fbxo22,Metap2,Rnf7,Nr1h2,Ubxn1	protein processing	0.852987
GO:0043010	1.05207	0.82826	138	6	Hdac2,Mterf4,Ift122,Vax2,Fzd5,Gja1	camera-type eye development	0.854534
GO:0051604	1.03597	0.830306	140	6	Vps35,Fbxo22,Metap2,Rnf7,Nr1h2,Ubxn1	protein maturation	0.855178
GO:0071363	1.0281	0.831388	141	6	Sulf1,Ctgf,Ulk1,Eid2,Fgf4,Trp53	cellular response to growth factor stimulus	0.855178
GO:0001525	1.0886	0.837109	156	7	Sulf1,Ctgf,Gna13,Ovol2,Rbpj,Fzd5,Hs6st1	angiogenesis	0.859768
GO:0007409	1.05254	0.850116	184	8	Pla2g10,Usp33,Ttl,Ulk1,Ryk,Vax2,Fzd5,Foxd3	axonogenesis	0.871816
GO:0003158	1.00506	1	24	1	Rbpj	endothelium development	1
GO:0006112	1.00506	1	24	1	Acadm	energy reserve metabolic process	1
GO:0006612	1.00506	1	24	1	Folr1	protein targeting to membrane	1
GO:0006809	1.00506	1	24	1	Sod2	nitric oxide biosynthetic process	1
GO:0006865	1.00508	1	48	2	Folr1,Slc25a13	amino acid transport	1
GO:0007140	1.00506	1	24	1	Trip13	male meiosis	1
GO:0007292	1.00508	1	48	2	Trip13,Piwil2	female gamete generation	1
GO:0015807	1.00506	1	24	1	Slc25a13	L-amino acid transport	1
GO:0030433	1.00506	1	24	1	Fbxo6	ER-associated protein catabolic process	1
GO:0032623	1.00506	1	24	1	Clec2i	interleukin-2 production	1
GO:0034614	1.00506	1	24	1	Sod2	cellular response to reactive oxygen species	1
GO:0042476	1.00508	1	48	2	Hdac2,Fgf4	odontogenesis	1
GO:0048286	1.00506	1	24	1	Hs6st1	lung alveolus development	1
GO:0048806	1.00506	1	24	1	Ncoa3	genitalia development	1
GO:0055010	1.00506	1	24	1	Rbpj	ventricular cardiac muscle tissue morphogenesis	1
GO:0070848	1.00517	1	144	6	Sulf1,Ctgf,Ulk1,Eid2,Fgf4,Trp53	response to growth factor stimulus	1
GO:2000146	1.00508	1	48	2	Sulf1,Gtpbp4	negative regulation of cell motility	1

## Sheet: component 4 negative
	odds.ratio	p.value	n.categoy	n.category.and.component	genes	description	FDR
GO:0000002	23.5805	0.0046506	12	2	Mrpl17,Polg	mitochondrial genome maintenance	0.459438
GO:0046928	23.5805	0.0046506	12	2	Sncg,Rab3a	regulation of neurotransmitter secretion	0.459438
GO:0007005	4.8288	0.00570102	133	5	Tmem70,Mrpl17,Rab3a,Polg,Gm1305	mitochondrion organization	0.459438
GO:0072210	18.1419	0.00727633	15	2	Pdgfb,Lgr4	metanephric nephron development	0.459438
GO:0000271	16.847	0.00826976	16	2	Pdgfb,Dyrk2	polysaccharide biosynthetic process	0.459438
GO:0061005	14.7426	0.0104276	18	2	Pdgfb,Lgr4	cell differentiation involved in kidney development	0.459438
GO:0042445	7.05198	0.0113187	54	3	Crhbp,Dhrs9,Pcsk2	hormone metabolic process	0.459438
GO:0051928	13.0967	0.0128066	20	2	Pdgfb,Clec4b1	positive regulation of calcium ion transport	0.459438
GO:0060445	12.4099	0.0140766	21	2	Pdgfb,Plxna1	branching involved in salivary gland morphogenesis	0.459438
GO:0010817	4.21378	0.019469	119	4	Crhbp,Dhrs9,Pcsk2,Myrip	regulation of hormone levels	0.459438
GO:0016236	10.2472	0.0196697	25	2	Atg16l1,Becn1	macroautophagy	0.459438
GO:0007435	9.81679	0.0211915	26	2	Pdgfb,Plxna1	salivary gland morphogenesis	0.459438
GO:0051648	5.27315	0.0235303	71	3	Rab3a,Myrip,Syndig1	vesicle localization	0.459438
GO:0032835	9.06193	0.024377	28	2	Pdgfb,Lgr4	glomerulus development	0.459438
GO:0070374	9.06193	0.024377	28	2	Pdgfb,Sema7a	positive regulation of ERK1 and ERK2 cascade	0.459438
GO:0007431	8.72567	0.0260389	29	2	Pdgfb,Plxna1	salivary gland development	0.459438
GO:0050672	7.84948	0.0312903	32	2	Inpp5d,Il2ra	negative regulation of lymphocyte proliferation	0.459438
GO:0070664	7.59541	0.0331265	33	2	Inpp5d,Il2ra	negative regulation of leukocyte proliferation	0.459438
GO:0050804	4.41701	0.0362726	84	3	Sncg,Cpeb1,Rab3a	regulation of synaptic transmission	0.459438
GO:0007269	7.13388	0.0369224	35	2	Sncg,Rab3a	neurotransmitter secretion	0.459438
GO:0001656	6.72277	0.0408774	37	2	Pdgfb,Lgr4	metanephros development	0.459438
GO:0035272	6.72277	0.0408774	37	2	Pdgfb,Plxna1	exocrine system development	0.459438
GO:0090276	6.35772	0.0449853	39	2	Crhbp,Myrip	regulation of peptide hormone secretion	0.459438
GO:0051046	3.1888	0.0452079	155	4	Crhbp,Sncg,Rab3a,Myrip	regulation of secretion	0.459438
GO:0048588	6.18945	0.0470946	40	2	Fgf13,Sema7a	developmental cell growth	0.459438
GO:0009267	6.02982	0.0492397	41	2	Atg16l1,Becn1	cellular response to starvation	0.459438
GO:0043270	6.02982	0.0492397	41	2	Pdgfb,Clec4b1	positive regulation of ion transport	0.459438
GO:0006836	5.87816	0.0514199	42	2	Sncg,Rab3a	neurotransmitter transport	0.459438
GO:0016051	5.87816	0.0514199	42	2	Pdgfb,Dyrk2	carbohydrate biosynthetic process	0.459438
GO:0034765	5.87816	0.0514199	42	2	Pdgfb,Crhbp	regulation of ion transmembrane transport	0.459438
GO:0051924	5.73389	0.0536345	43	2	Pdgfb,Clec4b1	regulation of calcium ion transport	0.459438
GO:0042594	5.59649	0.0558827	44	2	Atg16l1,Becn1	response to starvation	0.459438
GO:0007033	5.46613	0.0581637	45	2	Atg16l1,Becn1	vacuole organization	0.459438
GO:0008361	5.46613	0.0581637	45	2	Fgf13,Sema7a	regulation of cell size	0.459438
GO:0050795	5.46613	0.0581637	45	2	Pdgfb,Crhbp	regulation of behavior	0.459438
GO:0006914	5.34107	0.060477	46	2	Atg16l1,Becn1	autophagy	0.459438
GO:0046883	5.34107	0.060477	46	2	Crhbp,Myrip	regulation of hormone secretion	0.459438
GO:0001505	5.22142	0.0628217	47	2	Sncg,Rab3a	regulation of neurotransmitter levels	0.459438
GO:0070372	5.22142	0.0628217	47	2	Pdgfb,Sema7a	regulation of ERK1 and ERK2 cascade	0.459438
GO:0031669	5.10695	0.0651972	48	2	Atg16l1,Becn1	cellular response to nutrient levels	0.459438
GO:0007565	4.89198	0.0700377	50	2	Crhbp,Stx2	female pregnancy	0.459438
GO:0050770	4.60159	0.0775122	53	2	Fgf13,Sema7a	regulation of axonogenesis	0.459438
GO:0030072	4.51318	0.0800581	54	2	Crhbp,Myrip	peptide hormone secretion	0.459438
GO:0070371	4.51318	0.0800581	54	2	Pdgfb,Sema7a	ERK1 and ERK2 cascade	0.459438
GO:0048638	4.4271	0.0826302	55	2	Fgf13,Sema7a	regulation of developmental growth	0.459438
GO:0010595	12.8483	0.0839251	10	1	Pdgfb	positive regulation of endothelial cell migration	0.459438
GO:0010907	12.8483	0.0839251	10	1	Dyrk2	positive regulation of glucose metabolic process	0.459438
GO:0019229	12.8483	0.0839251	10	1	Pdgfb	regulation of vasoconstriction	0.459438
GO:0030539	12.8483	0.0839251	10	1	Lgr4	male genitalia development	0.459438
GO:0042036	12.8483	0.0839251	10	1	Inpp5d	negative regulation of cytokine biosynthetic process	0.459438
GO:0042104	12.8483	0.0839251	10	1	Il2ra	positive regulation of activated T cell proliferation	0.459438
GO:0042417	12.8483	0.0839251	10	1	Spr	dopamine metabolic process	0.459438
GO:0045579	12.8483	0.0839251	10	1	Inpp5d	positive regulation of B cell differentiation	0.459438
GO:0045671	12.8483	0.0839251	10	1	Inpp5d	negative regulation of osteoclast differentiation	0.459438
GO:0045773	12.8483	0.0839251	10	1	Sema7a	positive regulation of axon extension	0.459438
GO:0048661	12.8483	0.0839251	10	1	Pdgfb	positive regulation of smooth muscle cell proliferation	0.459438
GO:0070509	12.8483	0.0839251	10	1	Pdgfb	calcium ion import	0.459438
GO:2000272	12.8483	0.0839251	10	1	Crhbp	negative regulation of receptor activity	0.459438
GO:0002790	4.26459	0.0878501	57	2	Crhbp,Myrip	peptide secretion	0.459438
GO:0007568	4.18803	0.0904968	58	2	Inpp5d,Polg	aging	0.459438
GO:0005978	11.5636	0.0919279	11	1	Dyrk2	glycogen biosynthetic process	0.459438
GO:0007019	11.5636	0.0919279	11	1	Fgf13	microtubule depolymerization	0.459438
GO:0009755	11.5636	0.0919279	11	1	Crhbp	hormone-mediated signaling pathway	0.459438
GO:0035329	11.5636	0.0919279	11	1	Wtip	hippo signaling cascade	0.459438
GO:0045471	11.5636	0.0919279	11	1	Crhbp	response to ethanol	0.459438
GO:0051279	11.5636	0.0919279	11	1	Clec4b1	regulation of release of sequestered calcium ion into cytosol	0.459438
GO:0070193	11.5636	0.0919279	11	1	Cpeb1	synaptonemal complex organization	0.459438
GO:0071526	11.5636	0.0919279	11	1	Plxna1	semaphorin-plexin signaling pathway	0.459438
GO:0006412	2.93595	0.092986	124	3	Mrpl52,Cpeb1,Mrpl17	translation	0.459438
GO:0043623	2.91136	0.09471	125	3	Mtss1,Tmem70,Fgf13	cellular protein complex assembly	0.459438
GO:0071407	4.04195	0.0958606	60	2	Pdgfb,Crhbp	cellular response to organic cyclic compound	0.459438
GO:0001881	10.5112	0.0998622	12	1	Trat1	receptor recycling	0.459438
GO:0009410	10.5112	0.0998622	12	1	As3mt	response to xenobiotic stimulus	0.459438
GO:0014812	10.5112	0.0998622	12	1	Pdgfb	muscle cell migration	0.459438
GO:0030889	10.5112	0.0998622	12	1	Inpp5d	negative regulation of B cell proliferation	0.459438
GO:0045648	10.5112	0.0998622	12	1	Inpp5d	positive regulation of erythrocyte differentiation	0.459438
GO:0050850	10.5112	0.0998622	12	1	Trat1	positive regulation of calcium-mediated signaling	0.459438
GO:0071277	10.5112	0.0998622	12	1	Crhbp	cellular response to calcium ion	0.459438
GO:0031667	3.9059	0.101314	62	2	Atg16l1,Becn1	response to nutrient levels	0.459438
GO:0051250	3.9059	0.101314	62	2	Inpp5d,Il2ra	negative regulation of lymphocyte activation	0.459438
GO:0061138	2.81692	0.101738	129	3	Pdgfb,Plxna1,Lgr4	morphogenesis of a branching epithelium	0.459438
GO:0031668	3.84124	0.104074	63	2	Atg16l1,Becn1	cellular response to extracellular stimulus	0.459438
GO:0007179	3.77869	0.106854	64	2	Pdgfb,Htra3	transforming growth factor beta receptor signaling pathway	0.459438
GO:0015833	3.77869	0.106854	64	2	Crhbp,Myrip	peptide transport	0.459438
GO:0001523	9.63742	0.107729	13	1	Dhrs9	retinoid metabolic process	0.459438
GO:0006024	9.63742	0.107729	13	1	Pdgfb	glycosaminoglycan biosynthetic process	0.459438
GO:0006584	9.63742	0.107729	13	1	Spr	catecholamine metabolic process	0.459438
GO:0009712	9.63742	0.107729	13	1	Spr	catechol-containing compound metabolic process	0.459438
GO:0010543	9.63742	0.107729	13	1	Pdgfb	regulation of platelet activation	0.459438
GO:0031111	9.63742	0.107729	13	1	Fgf13	negative regulation of microtubule polymerization or depolymerization	0.459438
GO:0043552	9.63742	0.107729	13	1	Pdgfb	positive regulation of phosphatidylinositol 3-kinase activity	0.459438
GO:0045124	9.63742	0.107729	13	1	Inpp5d	regulation of bone resorption	0.459438
GO:0050881	9.63742	0.107729	13	1	Spr	musculoskeletal movement	0.459438
GO:0072080	9.63742	0.107729	13	1	Lgr4	nephron tubule development	0.459438
GO:0001763	2.70685	0.110812	134	3	Pdgfb,Plxna1,Lgr4	morphogenesis of a branching structure	0.459438
GO:0051258	3.6027	0.115313	67	2	Mtss1,Fgf13	protein polymerization	0.459438
GO:0006766	8.89347	0.115528	14	1	Tpk1	vitamin metabolic process	0.459438
GO:0009262	8.89347	0.115528	14	1	Tbpl1	deoxyribonucleotide metabolic process	0.459438
GO:0030224	8.89347	0.115528	14	1	Inpp5d	monocyte differentiation	0.459438
GO:0030851	8.89347	0.115528	14	1	Inpp5d	granulocyte differentiation	0.459438
GO:0031952	8.89347	0.115528	14	1	Pdgfb	regulation of protein autophosphorylation	0.459438
GO:0035886	8.89347	0.115528	14	1	Pdgfb	vascular smooth muscle cell differentiation	0.459438
GO:0046888	8.89347	0.115528	14	1	Crhbp	negative regulation of hormone secretion	0.459438
GO:0048103	8.89347	0.115528	14	1	Fgf13	somatic stem cell division	0.459438
GO:0046879	3.49349	0.121046	69	2	Crhbp,Myrip	hormone secretion	0.459438
GO:0072073	3.49349	0.121046	69	2	Pdgfb,Lgr4	kidney epithelium development	0.459438
GO:0001938	8.25796	0.12326	15	1	Pdgfb	positive regulation of endothelial cell proliferation	0.459438
GO:0003016	8.25796	0.12326	15	1	Rab3a	respiratory system process	0.459438
GO:0007143	8.25796	0.12326	15	1	Fmn2	female meiosis	0.459438
GO:0010259	8.25796	0.12326	15	1	Inpp5d	multicellular organismal aging	0.459438
GO:0010522	8.25796	0.12326	15	1	Clec4b1	regulation of calcium ion transport into cytosol	0.459438
GO:0042771	8.25796	0.12326	15	1	Dyrk2	intrinsic apoptotic signaling pathway in response to DNA damage by p53 class mediator	0.459438
GO:0043534	8.25796	0.12326	15	1	Pdgfb	blood vessel endothelial cell migration	0.459438
GO:0043981	8.25796	0.12326	15	1	Jade2	histone H4-K5 acetylation	0.459438
GO:0043982	8.25796	0.12326	15	1	Jade2	histone H4-K8 acetylation	0.459438
GO:0048488	8.25796	0.12326	15	1	Rab3a	synaptic vesicle endocytosis	0.459438
GO:0048660	8.25796	0.12326	15	1	Pdgfb	regulation of smooth muscle cell proliferation	0.459438
GO:0051055	8.25796	0.12326	15	1	Pdgfb	negative regulation of lipid biosynthetic process	0.459438
GO:0072384	8.25796	0.12326	15	1	Gm1305	organelle transport along microtubule	0.459438
GO:0007018	3.44162	0.12394	70	2	Fmn2,Gm1305	microtubule-based movement	0.459438
GO:0071560	3.44162	0.12394	70	2	Pdgfb,Htra3	cellular response to transforming growth factor beta stimulus	0.459438
GO:0002762	7.70692	0.130926	16	1	Inpp5d	negative regulation of myeloid leukocyte differentiation	0.459438
GO:0010594	7.70692	0.130926	16	1	Pdgfb	regulation of endothelial cell migration	0.459438
GO:0014068	7.70692	0.130926	16	1	Pdgfb	positive regulation of phosphatidylinositol 3-kinase cascade	0.459438
GO:0030514	7.70692	0.130926	16	1	Htra3	negative regulation of BMP signaling pathway	0.459438
GO:0042310	7.70692	0.130926	16	1	Pdgfb	vasoconstriction	0.459438
GO:0043550	7.70692	0.130926	16	1	Pdgfb	regulation of lipid kinase activity	0.459438
GO:0043966	7.70692	0.130926	16	1	Jade2	histone H3 acetylation	0.459438
GO:0046850	7.70692	0.130926	16	1	Inpp5d	regulation of bone remodeling	0.459438
GO:0048659	7.70692	0.130926	16	1	Pdgfb	smooth muscle cell proliferation	0.459438
GO:0050848	7.70692	0.130926	16	1	Trat1	regulation of calcium-mediated signaling	0.459438
GO:0060560	3.24814	0.135679	74	2	Fgf13,Sema7a	developmental growth involved in morphogenesis	0.459438
GO:0022604	2.45671	0.135791	147	3	Fgf13,Wtip,Sema7a	regulation of cell morphogenesis	0.459438
GO:0000045	7.22531	0.138526	17	1	Atg16l1	autophagic vacuole assembly	0.459438
GO:0001783	7.22531	0.138526	17	1	Traf3ip2	B cell apoptotic process	0.459438
GO:0015844	7.22531	0.138526	17	1	Sncg	monoamine transport	0.459438
GO:0030512	7.22531	0.138526	17	1	Htra3	negative regulation of transforming growth factor beta receptor signaling pathway	0.459438
GO:0032024	7.22531	0.138526	17	1	Myrip	positive regulation of insulin secretion	0.459438
GO:0032814	7.22531	0.138526	17	1	Slamf7	regulation of natural killer cell activation	0.459438
GO:0035690	7.22531	0.138526	17	1	Crhbp	cellular response to drug	0.459438
GO:0043627	7.22531	0.138526	17	1	Crhbp	response to estrogen stimulus	0.459438
GO:0046785	7.22531	0.138526	17	1	Fgf13	microtubule polymerization	0.459438
GO:0072332	7.22531	0.138526	17	1	Dyrk2	intrinsic apoptotic signaling pathway by p53 class mediator	0.459438
GO:0090277	7.22531	0.138526	17	1	Myrip	positive regulation of peptide hormone secretion	0.459438
GO:0009991	3.11656	0.144643	77	2	Atg16l1,Becn1	response to extracellular stimulus	0.459438
GO:0000079	6.79809	0.146061	18	1	Pdgfb	regulation of cyclin-dependent protein kinase activity	0.459438
GO:0010506	6.79809	0.146061	18	1	Becn1	regulation of autophagy	0.459438
GO:0010634	6.79809	0.146061	18	1	Pdgfb	positive regulation of epithelial cell migration	0.459438
GO:0016079	6.79809	0.146061	18	1	Rab3a	synaptic vesicle exocytosis	0.459438
GO:0043631	6.79809	0.146061	18	1	Papolb	RNA polyadenylation	0.459438
GO:0048146	6.79809	0.146061	18	1	Pdgfb	positive regulation of fibroblast proliferation	0.459438
GO:0048639	6.79809	0.146061	18	1	Sema7a	positive regulation of developmental growth	0.459438
GO:0050856	6.79809	0.146061	18	1	Trat1	regulation of T cell receptor signaling pathway	0.459438
GO:0051653	6.79809	0.146061	18	1	Fmn2	spindle localization	0.459438
GO:0060968	6.79809	0.146061	18	1	Wtip	regulation of gene silencing	0.459438
GO:0060993	6.79809	0.146061	18	1	Lgr4	kidney morphogenesis	0.459438
GO:0071383	6.79809	0.146061	18	1	Crhbp	cellular response to steroid hormone stimulus	0.459438
GO:0030534	3.075	0.14766	78	2	Crhbp,Sncg	adult behavior	0.459438
GO:0050808	3.075	0.14766	78	2	Sncg,Rab3a	synapse organization	0.459438
GO:0007566	6.42	0.153532	19	1	Stx2	embryo implantation	0.459438
GO:0017145	6.42	0.153532	19	1	Fgf13	stem cell division	0.459438
GO:0021795	6.42	0.153532	19	1	Fgf13	cerebral cortex cell migration	0.459438
GO:0030193	6.42	0.153532	19	1	Pdgfb	regulation of blood coagulation	0.459438
GO:0030516	6.42	0.153532	19	1	Sema7a	regulation of axon extension	0.459438
GO:0042311	6.42	0.153532	19	1	Pdgfb	vasodilation	0.459438
GO:0043244	6.42	0.153532	19	1	Fgf13	regulation of protein complex disassembly	0.459438
GO:0045132	6.42	0.153532	19	1	Fmn2	meiotic chromosome segregation	0.459438
GO:0050771	6.42	0.153532	19	1	Fgf13	negative regulation of axonogenesis	0.459438
GO:0060976	6.42	0.153532	19	1	Pdgfb	coronary vasculature development	0.459438
GO:2000377	6.42	0.153532	19	1	Pdgfb	regulation of reactive oxygen species metabolic process	0.459438
GO:0022612	2.91921	0.159853	82	2	Pdgfb,Plxna1	gland morphogenesis	0.459438
GO:0006720	6.08133	0.160939	20	1	Dhrs9	isoprenoid metabolic process	0.459438
GO:0007129	6.08133	0.160939	20	1	Cpeb1	synapsis	0.459438
GO:0031397	6.08133	0.160939	20	1	Bag5	negative regulation of protein ubiquitination	0.459438
GO:0040036	6.08133	0.160939	20	1	Pdgfb	regulation of fibroblast growth factor receptor signaling pathway	0.459438
GO:0045577	6.08133	0.160939	20	1	Inpp5d	regulation of B cell differentiation	0.459438
GO:0045670	6.08133	0.160939	20	1	Inpp5d	regulation of osteoclast differentiation	0.459438
GO:0045833	6.08133	0.160939	20	1	Pdgfb	negative regulation of lipid metabolic process	0.459438
GO:0050798	6.08133	0.160939	20	1	Il2ra	activated T cell proliferation	0.459438
GO:0061097	6.08133	0.160939	20	1	Pdgfb	regulation of protein tyrosine kinase activity	0.459438
GO:0071356	6.08133	0.160939	20	1	Crhbp	cellular response to tumor necrosis factor	0.459438
GO:0071897	6.08133	0.160939	20	1	Pdgfb	DNA biosynthetic process	0.459438
GO:0007126	2.88267	0.162931	83	2	Cpeb1,Fmn2	meiosis	0.459438
GO:0060070	2.88267	0.162931	83	2	Lgr4,Fzd10	canonical Wnt receptor signaling pathway	0.459438
GO:0002367	5.77653	0.168282	21	1	Sema7a	cytokine production involved in immune response	0.459438
GO:0030048	5.77653	0.168282	21	1	Myrip	actin filament-based movement	0.459438
GO:0043279	5.77653	0.168282	21	1	Crhbp	response to alkaloid	0.459438
GO:0043467	5.77653	0.168282	21	1	Dyrk2	regulation of generation of precursor metabolites and energy	0.459438
GO:0048168	5.77653	0.168282	21	1	Cpeb1	regulation of neuronal synaptic plasticity	0.459438
GO:0048284	5.77653	0.168282	21	1	Rab3a	organelle fusion	0.459438
GO:0050772	5.77653	0.168282	21	1	Sema7a	positive regulation of axonogenesis	0.459438
GO:0050869	5.77653	0.168282	21	1	Inpp5d	negative regulation of B cell activation	0.459438
GO:0006954	2.19064	0.171081	164	3	Crhbp,Il2ra,Sema7a	inflammatory response	0.459438
GO:0006260	2.77825	0.17223	86	2	Pdgfb,Polg	DNA replication	0.459438
GO:0045646	5.50144	0.175562	22	1	Inpp5d	regulation of erythrocyte differentiation	0.459438
GO:0046580	5.50144	0.175562	22	1	Rasa4	negative regulation of Ras protein signal transduction	0.459438
GO:0046887	5.50144	0.175562	22	1	Myrip	positive regulation of hormone secretion	0.459438
GO:0048010	5.50144	0.175562	22	1	Pdgfb	vascular endothelial growth factor receptor signaling pathway	0.459438
GO:0051321	2.71259	0.17848	88	2	Cpeb1,Fmn2	meiotic cell cycle	0.459438
GO:0010769	2.68096	0.181618	89	2	Fgf13,Sema7a	regulation of cell morphogenesis involved in differentiation	0.459438
GO:0001936	5.2507	0.182779	23	1	Pdgfb	regulation of endothelial cell proliferation	0.459438
GO:0005977	5.2507	0.182779	23	1	Dyrk2	glycogen metabolic process	0.459438
GO:0006661	5.2507	0.182779	23	1	Pdgfb	phosphatidylinositol biosynthetic process	0.459438
GO:0007229	5.2507	0.182779	23	1	Sema7a	integrin-mediated signaling pathway	0.459438
GO:0043029	5.2507	0.182779	23	1	Il2ra	T cell homeostasis	0.459438
GO:0045055	5.2507	0.182779	23	1	Crhbp	regulated secretory pathway	0.459438
GO:0048008	5.2507	0.182779	23	1	Pdgfb	platelet-derived growth factor receptor signaling pathway	0.459438
GO:0050921	5.2507	0.182779	23	1	Pdgfb	positive regulation of chemotaxis	0.459438
GO:0070534	5.2507	0.182779	23	1	Birc2	protein K63-linked ubiquitination	0.459438
GO:0032535	2.65003	0.184766	90	2	Fgf13,Sema7a	regulation of cellular component size	0.459438
GO:0050727	2.61981	0.187921	91	2	Il2ra,Sema7a	regulation of inflammatory response	0.459438
GO:0003158	5.02029	0.189935	24	1	Pdgfb	endothelium development	0.459438
GO:0006112	5.02029	0.189935	24	1	Dyrk2	energy reserve metabolic process	0.459438
GO:0007040	5.02029	0.189935	24	1	Becn1	lysosome organization	0.459438
GO:0010906	5.02029	0.189935	24	1	Dyrk2	regulation of glucose metabolic process	0.459438
GO:0014066	5.02029	0.189935	24	1	Pdgfb	regulation of phosphatidylinositol 3-kinase cascade	0.459438
GO:0031047	5.02029	0.189935	24	1	Wtip	gene silencing by RNA	0.459438
GO:0031110	5.02029	0.189935	24	1	Fgf13	regulation of microtubule polymerization or depolymerization	0.459438
GO:0045453	5.02029	0.189935	24	1	Inpp5d	bone resorption	0.459438
GO:0048806	5.02029	0.189935	24	1	Lgr4	genitalia development	0.459438
GO:0061041	5.02029	0.189935	24	1	Pdgfb	regulation of wound healing	0.459438
GO:0070936	5.02029	0.189935	24	1	Birc2	protein K48-linked ubiquitination	0.459438
GO:0022029	4.811	0.19703	25	1	Fgf13	telencephalon cell migration	0.467057
GO:0034612	4.811	0.19703	25	1	Crhbp	response to tumor necrosis factor	0.467057
GO:0042130	4.811	0.19703	25	1	Il2ra	negative regulation of T cell proliferation	0.467057
GO:0051592	4.811	0.19703	25	1	Crhbp	response to calcium ion	0.467057
GO:0001558	2.5331	0.197434	94	2	Fgf13,Sema7a	regulation of cell growth	0.467057
GO:0006887	2.50541	0.200619	95	2	Crhbp,Rab3a	exocytosis	0.470309
GO:0003014	4.6177	0.204063	26	1	Pdgfb	renal system process	0.470309
GO:0007215	4.6177	0.204063	26	1	Crhbp	glutamate receptor signaling pathway	0.470309
GO:0007613	4.6177	0.204063	26	1	Fgf13	memory	0.470309
GO:0008630	4.6177	0.204063	26	1	Dyrk2	intrinsic apoptotic signaling pathway in response to DNA damage	0.470309
GO:0048520	4.6177	0.204063	26	1	Pdgfb	positive regulation of behavior	0.470309
GO:0001935	4.43986	0.211036	27	1	Pdgfb	endothelial cell proliferation	0.471963
GO:0006275	4.43986	0.211036	27	1	Pdgfb	regulation of DNA replication	0.471963
GO:0021885	4.43986	0.211036	27	1	Fgf13	forebrain cell migration	0.471963
GO:0051209	4.43986	0.211036	27	1	Clec4b1	release of sequestered calcium ion into cytosol	0.471963
GO:0071241	4.43986	0.211036	27	1	Crhbp	cellular response to inorganic substance	0.471963
GO:0001890	2.40031	0.213421	99	2	Pdgfb,Birc2	placenta development	0.471963
GO:0034220	2.40031	0.213421	99	2	Pdgfb,Crhbp	ion transmembrane transport	0.471963
GO:0007409	1.94145	0.215579	184	3	Fgf13,Rab3a,Sema7a	axonogenesis	0.471963
GO:0061024	1.93043	0.217871	185	3	Fgf13,Rab3a,Syndig1	membrane organization	0.471963
GO:0001658	4.27463	0.21795	28	1	Lgr4	branching involved in ureteric bud morphogenesis	0.471963
GO:0010632	4.27463	0.21795	28	1	Pdgfb	regulation of epithelial cell migration	0.471963
GO:0030203	4.27463	0.21795	28	1	Pdgfb	glycosaminoglycan metabolic process	0.471963
GO:0043241	4.27463	0.21795	28	1	Fgf13	protein complex disassembly	0.471963
GO:0007281	2.35103	0.219854	101	2	Fmn2,Tbpl1	germ cell development	0.471963
GO:0006816	2.32711	0.223078	102	2	Pdgfb,Clec4b1	calcium ion transport	0.471963
GO:0007088	4.12127	0.224804	29	1	Pdgfb	regulation of mitosis	0.471963
GO:0007405	4.12127	0.224804	29	1	Fgf13	neuroblast proliferation	0.471963
GO:0010469	4.12127	0.224804	29	1	Crhbp	regulation of receptor activity	0.471963
GO:0030168	4.12127	0.224804	29	1	Pdgfb	platelet activation	0.471963
GO:0030307	4.12127	0.224804	29	1	Sema7a	positive regulation of cell growth	0.471963
GO:0061025	4.12127	0.224804	29	1	Rab3a	membrane fusion	0.471963
GO:0007585	3.97858	0.231599	30	1	Rab3a	respiratory gaseous exchange	0.471963
GO:0008543	3.97858	0.231599	30	1	Pdgfb	fibroblast growth factor receptor signaling pathway	0.471963
GO:0030510	3.97858	0.231599	30	1	Htra3	regulation of BMP signaling pathway	0.471963
GO:0045639	3.97858	0.231599	30	1	Inpp5d	positive regulation of myeloid cell differentiation	0.471963
GO:0048675	3.97858	0.231599	30	1	Sema7a	axon extension	0.471963
GO:0010975	2.25808	0.232772	105	2	Fgf13,Sema7a	regulation of neuron projection development	0.471963
GO:0051051	2.25808	0.232772	105	2	Crhbp,Trat1	negative regulation of transport	0.471963
GO:0051050	1.8566	0.234059	192	3	Pdgfb,Clec4b1,Myrip	positive regulation of transport	0.471963
GO:0006959	3.84538	0.238335	31	1	Traf3ip2	humoral immune response	0.471963
GO:0014065	3.84538	0.238335	31	1	Pdgfb	phosphatidylinositol 3-kinase cascade	0.471963
GO:0021766	3.84538	0.238335	31	1	Fgf13	hippocampus development	0.471963
GO:0030101	3.84538	0.238335	31	1	Slamf7	natural killer cell activation	0.471963
GO:0031109	3.84538	0.238335	31	1	Fgf13	microtubule polymerization or depolymerization	0.471963
GO:0032412	3.84538	0.238335	31	1	Crhbp	regulation of ion transmembrane transporter activity	0.471963
GO:0044344	3.84538	0.238335	31	1	Pdgfb	cellular response to fibroblast growth factor stimulus	0.471963
GO:0048477	3.84538	0.238335	31	1	Fmn2	oogenesis	0.471963
GO:0018108	2.21442	0.239252	107	2	Pdgfb,Dyrk2	peptidyl-tyrosine phosphorylation	0.471963
GO:0051251	2.21442	0.239252	107	2	Inpp5d,Il2ra	positive regulation of lymphocyte activation	0.471963
GO:0043967	3.72084	0.245014	32	1	Jade2	histone H4 acetylation	0.471963
GO:0046849	3.72084	0.245014	32	1	Inpp5d	bone remodeling	0.471963
GO:0051494	3.72084	0.245014	32	1	Fgf13	negative regulation of cytoskeleton organization	0.471963
GO:0060401	3.72084	0.245014	32	1	Clec4b1	cytosolic calcium ion transport	0.471963
GO:0060402	3.72084	0.245014	32	1	Clec4b1	calcium ion transport into cytosol	0.471963
GO:0060688	3.72084	0.245014	32	1	Lgr4	regulation of morphogenesis of a branching structure	0.471963
GO:0006997	3.60418	0.251636	33	1	Tbpl1	nucleus organization	0.471963
GO:0017015	3.60418	0.251636	33	1	Htra3	regulation of transforming growth factor beta receptor signaling pathway	0.471963
GO:0030888	3.60418	0.251636	33	1	Inpp5d	regulation of B cell proliferation	0.471963
GO:0045834	3.60418	0.251636	33	1	Pdgfb	positive regulation of lipid metabolic process	0.471963
GO:0048545	3.60418	0.251636	33	1	Crhbp	response to steroid hormone stimulus	0.471963
GO:0050920	3.60418	0.251636	33	1	Pdgfb	regulation of chemotaxis	0.471963
GO:0051145	3.60418	0.251636	33	1	Pdgfb	smooth muscle cell differentiation	0.471963
GO:0060675	3.60418	0.251636	33	1	Lgr4	ureteric bud morphogenesis	0.471963
GO:0007548	2.13154	0.252241	111	2	Lgr4,Fzd10	sex differentiation	0.471963
GO:0002683	2.11178	0.255493	112	2	Inpp5d,Il2ra	negative regulation of immune system process	0.476388
GO:0003073	3.49394	0.2582	34	1	Pdgfb	regulation of systemic arterial blood pressure	0.478116
GO:0046890	3.49394	0.2582	34	1	Pdgfb	regulation of lipid biosynthetic process	0.478116
GO:0050673	2.07332	0.262	114	2	Pdgfb,Lgr4	epithelial cell proliferation	0.478615
GO:0016050	3.39075	0.264709	35	1	Rab3a	vesicle organization	0.478615
GO:0045638	3.39075	0.264709	35	1	Inpp5d	negative regulation of myeloid cell differentiation	0.478615
GO:0045787	3.39075	0.264709	35	1	Pdgfb	positive regulation of cell cycle	0.478615
GO:0050796	3.39075	0.264709	35	1	Myrip	regulation of insulin secretion	0.478615
GO:0050852	3.39075	0.264709	35	1	Trat1	T cell receptor signaling pathway	0.478615
GO:0050871	3.39075	0.264709	35	1	Inpp5d	positive regulation of B cell activation	0.478615
GO:0019722	3.29331	0.271161	36	1	Trat1	calcium-mediated signaling	0.483765
GO:0031123	3.29331	0.271161	36	1	Papolb	RNA 3'-end processing	0.483765
GO:0043542	3.29331	0.271161	36	1	Pdgfb	endothelial cell migration	0.483765
GO:0050777	3.29331	0.271161	36	1	Inpp5d	negative regulation of immune response	0.483765
GO:0002761	3.20129	0.277558	37	1	Inpp5d	regulation of myeloid leukocyte differentiation	0.4855
GO:0009308	3.20129	0.277558	37	1	Aoc3	amine metabolic process	0.4855
GO:0030316	3.20129	0.277558	37	1	Inpp5d	osteoclast differentiation	0.4855
GO:0042102	3.20129	0.277558	37	1	Il2ra	positive regulation of T cell proliferation	0.4855
GO:0043112	3.20129	0.277558	37	1	Trat1	receptor metabolic process	0.4855
GO:0050728	3.20129	0.277558	37	1	Il2ra	negative regulation of inflammatory response	0.4855
GO:0006261	3.11424	0.283899	38	1	Polg	DNA-dependent DNA replication	0.488597
GO:0021761	3.11424	0.283899	38	1	Fgf13	limbic system development	0.488597
GO:0032675	3.11424	0.283899	38	1	Inpp5d	regulation of interleukin-6 production	0.488597
GO:0030031	1.94891	0.284788	121	2	Pdgfb,Tctn2	cell projection assembly	0.488597
GO:0032943	1.94891	0.284788	121	2	Inpp5d,Il2ra	mononuclear cell proliferation	0.488597
GO:0046651	1.94891	0.284788	121	2	Inpp5d,Il2ra	lymphocyte proliferation	0.488597
GO:0007178	1.93232	0.288041	122	2	Pdgfb,Htra3	transmembrane receptor protein serine/threonine kinase signaling pathway	0.490032
GO:0071345	1.93232	0.288041	122	2	Crhbp,Il2ra	cellular response to cytokine stimulus	0.490032
GO:0035150	3.03177	0.290187	39	1	Pdgfb	regulation of tube size	0.490032
GO:0048015	3.03177	0.290187	39	1	Pdgfb	phosphatidylinositol-mediated signaling	0.490032
GO:0050880	3.03177	0.290187	39	1	Pdgfb	regulation of blood vessel size	0.490032
GO:0016049	1.91601	0.291294	123	2	Fgf13,Sema7a	cell growth	0.490359
GO:0016055	1.89997	0.294544	124	2	Lgr4,Fzd10	Wnt receptor signaling pathway	0.494282
GO:0071229	2.95354	0.29642	40	1	Pdgfb	cellular response to acid	0.49588
GO:0070661	1.88419	0.297794	125	2	Inpp5d,Il2ra	leukocyte proliferation	0.496631
GO:0014070	1.86867	0.301041	126	2	Pdgfb,Crhbp	response to organic cyclic compound	0.498453
GO:0055085	1.86867	0.301041	126	2	Pdgfb,Crhbp	transmembrane transport	0.498453
GO:0050731	2.87922	0.302599	41	1	Pdgfb	positive regulation of peptidyl-tyrosine phosphorylation	0.498453
GO:2000021	2.87922	0.302599	41	1	Clec4b1	regulation of ion homeostasis	0.498453
GO:0031344	1.85341	0.304287	127	2	Fgf13,Sema7a	regulation of cell projection organization	0.4997
GO:0002260	2.80853	0.308726	42	1	Il2ra	lymphocyte homeostasis	0.502381
GO:0030041	2.80853	0.308726	42	1	Mtss1	actin filament polymerization	0.502381
GO:0046474	2.80853	0.308726	42	1	Pdgfb	glycerophospholipid biosynthetic process	0.502381
GO:0032388	2.7412	0.314799	43	1	Clec4b1	positive regulation of intracellular transport	0.50259
GO:0042100	2.7412	0.314799	43	1	Inpp5d	B cell proliferation	0.50259
GO:0050868	2.7412	0.314799	43	1	Il2ra	negative regulation of T cell activation	0.50259
GO:0072659	2.7412	0.314799	43	1	Fgf13	protein localization to plasma membrane	0.50259
GO:0000910	2.67695	0.32082	44	1	Fmn2	cytokinesis	0.50259
GO:0007204	2.67695	0.32082	44	1	Clec4b1	elevation of cytosolic calcium ion concentration	0.50259
GO:0007270	2.67695	0.32082	44	1	Crhbp	neuron-neuron synaptic transmission	0.50259
GO:0046488	2.67695	0.32082	44	1	Pdgfb	phosphatidylinositol metabolic process	0.50259
GO:0048489	2.67695	0.32082	44	1	Rab3a	synaptic vesicle transport	0.50259
GO:0090068	2.67695	0.32082	44	1	Pdgfb	positive regulation of cell cycle process	0.50259
GO:0043410	1.76653	0.323706	133	2	Pdgfb,Sema7a	positive regulation of MAPK cascade	0.50259
GO:0006518	2.6157	0.32679	45	1	Becn1	peptide metabolic process	0.50259
GO:0045621	2.6157	0.32679	45	1	Inpp5d	positive regulation of lymphocyte differentiation	0.50259
GO:0043065	1.75283	0.326931	134	2	Inpp5d,Il2ra	positive regulation of apoptotic process	0.50259
GO:0007219	2.55715	0.332708	46	1	Il2ra	Notch signaling pathway	0.50259
GO:0021987	2.55715	0.332708	46	1	Fgf13	cerebral cortex development	0.50259
GO:0042035	2.55715	0.332708	46	1	Inpp5d	regulation of cytokine biosynthetic process	0.50259
GO:0050679	2.55715	0.332708	46	1	Pdgfb	positive regulation of epithelial cell proliferation	0.50259
GO:0032787	1.72604	0.333372	136	2	As3mt,Dhrs9	monocarboxylic acid metabolic process	0.50259
GO:0043068	1.72604	0.333372	136	2	Inpp5d,Il2ra	positive regulation of programmed cell death	0.50259
GO:0045860	1.71294	0.336586	137	2	Pdgfb,Cacul1	positive regulation of protein kinase activity	0.50259
GO:0008654	2.50115	0.338575	47	1	Pdgfb	phospholipid biosynthetic process	0.50259
GO:0016064	2.50115	0.338575	47	1	Inpp5d	immunoglobulin mediated immune response	0.50259
GO:0030073	2.50115	0.338575	47	1	Myrip	insulin secretion	0.50259
GO:0030336	2.50115	0.338575	47	1	Pdgfb	negative regulation of cell migration	0.50259
GO:0051480	2.50115	0.338575	47	1	Clec4b1	cytosolic calcium ion homeostasis	0.50259
GO:0001822	1.70004	0.339796	138	2	Pdgfb,Lgr4	kidney development	0.50259
GO:0010942	1.68732	0.343002	139	2	Inpp5d,Il2ra	positive regulation of cell death	0.50259
GO:0007292	2.44752	0.344392	48	1	Fmn2	female gamete generation	0.50259
GO:0017157	2.44752	0.344392	48	1	Rab3a	regulation of exocytosis	0.50259
GO:0030509	2.44752	0.344392	48	1	Htra3	BMP signaling pathway	0.50259
GO:0070507	2.44752	0.344392	48	1	Fgf13	regulation of microtubule cytoskeleton organization	0.50259
GO:2000146	2.44752	0.344392	48	1	Pdgfb	negative regulation of cell motility	0.50259
GO:0071363	1.66243	0.349401	141	2	Pdgfb,Htra3	cellular response to growth factor stimulus	0.50259
GO:0002377	2.39596	0.350158	49	1	Traf3ip2	immunoglobulin production	0.50259
GO:0019724	2.39596	0.350158	49	1	Inpp5d	B cell mediated immunity	0.50259
GO:0030705	2.39596	0.350158	49	1	Gm1305	cytoskeleton-dependent intracellular transport	0.50259
GO:0072001	1.65026	0.352593	142	2	Pdgfb,Lgr4	renal system development	0.50259
GO:0000082	2.34675	0.355875	50	1	Cacul1	G1/S transition of mitotic cell cycle	0.50259
GO:0001666	2.34675	0.355875	50	1	Fundc1	response to hypoxia	0.50259
GO:0007286	2.34675	0.355875	50	1	Tbpl1	spermatid development	0.50259
GO:0008217	2.34675	0.355875	50	1	Pdgfb	regulation of blood pressure	0.50259
GO:0030010	2.34675	0.355875	50	1	Fgf13	establishment of cell polarity	0.50259
GO:0030595	2.34675	0.355875	50	1	Pdgfb	leukocyte chemotaxis	0.50259
GO:0035282	2.34675	0.355875	50	1	Mllt3	segmentation	0.50259
GO:0051271	2.34675	0.355875	50	1	Pdgfb	negative regulation of cellular component movement	0.50259
GO:0070848	1.62642	0.358962	144	2	Pdgfb,Htra3	response to growth factor stimulus	0.50259
GO:0032320	2.29946	0.361542	51	1	Rasa4	positive regulation of Ras GTPase activity	0.50259
GO:0042384	2.29946	0.361542	51	1	Tctn2	cilium assembly	0.50259
GO:0050671	2.29946	0.361542	51	1	Il2ra	positive regulation of lymphocyte proliferation	0.50259
GO:0048872	1.61475	0.362138	145	2	Inpp5d,Il2ra	homeostasis of number of cells	0.50259
GO:0008610	1.60324	0.36531	146	2	Pdgfb,Dhrs9	lipid biosynthetic process	0.50259
GO:0007127	2.25399	0.367161	52	1	Cpeb1	meiosis I	0.50259
GO:0007596	2.25399	0.367161	52	1	Pdgfb	blood coagulation	0.50259
GO:0050768	2.25399	0.367161	52	1	Fgf13	negative regulation of neurogenesis	0.50259
GO:0050851	2.25399	0.367161	52	1	Trat1	antigen receptor-mediated signaling pathway	0.50259
GO:0034097	1.59189	0.368476	147	2	Crhbp,Il2ra	response to cytokine stimulus	0.50259
GO:0006006	2.21016	0.372731	53	1	Dyrk2	glucose metabolic process	0.50259
GO:0007224	2.21016	0.372731	53	1	Tctn2	smoothened signaling pathway	0.50259
GO:0007599	2.21016	0.372731	53	1	Pdgfb	hemostasis	0.50259
GO:0010631	2.21016	0.372731	53	1	Pdgfb	epithelial cell migration	0.50259
GO:0016573	2.21016	0.372731	53	1	Jade2	histone acetylation	0.50259
GO:0018393	2.21016	0.372731	53	1	Jade2	internal peptidyl-lysine acetylation	0.50259
GO:0030308	2.21016	0.372731	53	1	Fgf13	negative regulation of cell growth	0.50259
GO:0048515	2.21016	0.372731	53	1	Tbpl1	spermatid differentiation	0.50259
GO:0033674	1.56966	0.37479	149	2	Pdgfb,Cacul1	positive regulation of kinase activity	0.50259
GO:0048589	1.55877	0.377938	150	2	Fgf13,Sema7a	developmental growth	0.50259
GO:0001776	2.16825	0.378253	54	1	Il2ra	leukocyte homeostasis	0.50259
GO:0007612	2.16825	0.378253	54	1	Fgf13	learning	0.50259
GO:0009165	2.16825	0.378253	54	1	Tbpl1	nucleotide biosynthetic process	0.50259
GO:0035051	2.16825	0.378253	54	1	Pdgfb	cardiocyte differentiation	0.50259
GO:0048167	2.16825	0.378253	54	1	Cpeb1	regulation of synaptic plasticity	0.50259
GO:0001657	2.12768	0.383728	55	1	Lgr4	ureteric bud development	0.50259
GO:0008154	2.12768	0.383728	55	1	Mtss1	actin polymerization or depolymerization	0.50259
GO:0019932	2.12768	0.383728	55	1	Trat1	second-messenger-mediated signaling	0.50259
GO:0040013	2.12768	0.383728	55	1	Pdgfb	negative regulation of locomotion	0.50259
GO:0042089	2.12768	0.383728	55	1	Inpp5d	cytokine biosynthetic process	0.50259
GO:0042107	2.12768	0.383728	55	1	Inpp5d	cytokine metabolic process	0.50259
GO:0072164	2.12768	0.383728	55	1	Lgr4	mesonephric tubule development	0.50259
GO:0072593	2.12768	0.383728	55	1	Pdgfb	reactive oxygen species metabolic process	0.50259
GO:0001823	2.08862	0.389155	56	1	Lgr4	mesonephros development	0.503557
GO:0006475	2.08862	0.389155	56	1	Jade2	internal protein amino acid acetylation	0.503557
GO:0016458	2.08862	0.389155	56	1	Wtip	gene silencing	0.503557
GO:0018394	2.08862	0.389155	56	1	Jade2	peptidyl-lysine acetylation	0.503557
GO:0042493	2.08862	0.389155	56	1	Crhbp	response to drug	0.503557
GO:0010608	1.51663	0.390469	154	2	Cpeb1,Wtip	posttranscriptional regulation of gene expression	0.504043
GO:0031346	2.05096	0.394535	57	1	Sema7a	positive regulation of cell projection organization	0.506855
GO:0050769	2.05096	0.394535	57	1	Sema7a	positive regulation of neurogenesis	0.506855
GO:0008344	2.01461	0.399869	58	1	Sncg	adult locomotory behavior	0.508839
GO:0010721	2.01461	0.399869	58	1	Fgf13	negative regulation of cell development	0.508839
GO:0018105	2.01461	0.399869	58	1	Pdgfb	peptidyl-serine phosphorylation	0.508839
GO:0040014	2.01461	0.399869	58	1	Spr	regulation of multicellular organism growth	0.508839
GO:0051302	1.97955	0.405157	59	1	Pdgfb	regulation of cell division	0.513136
GO:0060326	1.97955	0.405157	59	1	Pdgfb	cell chemotaxis	0.513136
GO:0007009	1.94566	0.4104	60	1	Fgf13	plasma membrane organization	0.517335
GO:0072089	1.94566	0.4104	60	1	Fgf13	stem cell proliferation	0.517335
GO:0045927	1.9129	0.415597	61	1	Sema7a	positive regulation of growth	0.520222
GO:0046661	1.9129	0.415597	61	1	Lgr4	male sex differentiation	0.520222
GO:0061351	1.9129	0.415597	61	1	Fgf13	neural precursor cell proliferation	0.520222
GO:0002768	1.88122	0.420749	62	1	Trat1	immune response-regulating cell surface receptor signaling pathway	0.520604
GO:0021543	1.88122	0.420749	62	1	Fgf13	pallium development	0.520604
GO:0030183	1.88122	0.420749	62	1	Inpp5d	B cell differentiation	0.520604
GO:0031396	1.88122	0.420749	62	1	Bag5	regulation of protein ubiquitination	0.520604
GO:0032886	1.88122	0.420749	62	1	Fgf13	regulation of microtubule-based process	0.520604
GO:0006473	1.85058	0.425857	63	1	Jade2	protein acetylation	0.522112
GO:0042129	1.85058	0.425857	63	1	Il2ra	regulation of T cell proliferation	0.522112
GO:0048771	1.85058	0.425857	63	1	Inpp5d	tissue remodeling	0.522112
GO:0050954	1.85058	0.425857	63	1	Rab3a	sensory perception of mechanical stimulus	0.522112
GO:0097193	1.82093	0.43092	64	1	Dyrk2	intrinsic apoptotic signaling pathway	0.527116
GO:0002699	1.76418	0.440916	66	1	Sema7a	positive regulation of immune effector process	0.538118
GO:0030218	1.71091	0.45074	68	1	Inpp5d	erythrocyte differentiation	0.548861
GO:0050730	1.68545	0.455589	69	1	Pdgfb	regulation of peptidyl-tyrosine phosphorylation	0.55351
GO:0001892	1.66073	0.460395	70	1	Pdgfb	embryonic placenta development	0.55683
GO:0001894	1.66073	0.460395	70	1	Inpp5d	tissue homeostasis	0.55683
GO:0006650	1.63671	0.46516	71	1	Pdgfb	glycerophospholipid metabolic process	0.561328
GO:0006417	1.61337	0.469884	72	1	Cpeb1	regulation of translation	0.561977
GO:0010720	1.61337	0.469884	72	1	Sema7a	positive regulation of cell development	0.561977
GO:0018205	1.61337	0.469884	72	1	Jade2	peptidyl-lysine modification	0.561977
GO:0034101	1.61337	0.469884	72	1	Inpp5d	erythrocyte homeostasis	0.561977
GO:0001764	1.59067	0.474567	73	1	Fgf13	neuron migration	0.565572
GO:0001101	1.5686	0.479209	74	1	Pdgfb	response to acid	0.565572
GO:0002064	1.5686	0.479209	74	1	Pdgfb	epithelial cell development	0.565572
GO:0009306	1.5686	0.479209	74	1	Traf3ip2	protein secretion	0.565572
GO:0043406	1.5686	0.479209	74	1	Pdgfb	positive regulation of MAP kinase activity	0.565572
GO:0045637	1.5686	0.479209	74	1	Inpp5d	regulation of myeloid cell differentiation	0.565572
GO:0006091	1.54712	0.483811	75	1	Dyrk2	generation of precursor metabolites and energy	0.568505
GO:0007163	1.54712	0.483811	75	1	Fgf13	establishment or maintenance of cell polarity	0.568505
GO:0032147	1.52622	0.488374	76	1	Pdgfb	activation of protein kinase activity	0.570443
GO:0006470	1.50586	0.492896	77	1	Rpap2	protein dephosphorylation	0.570443
GO:0009791	1.50586	0.492896	77	1	Rab3a	post-embryonic development	0.570443
GO:0019216	1.50586	0.492896	77	1	Pdgfb	regulation of lipid metabolic process	0.570443
GO:0045619	1.50586	0.492896	77	1	Inpp5d	regulation of lymphocyte differentiation	0.570443
GO:0050870	1.50586	0.492896	77	1	Il2ra	positive regulation of T cell activation	0.570443
GO:0051047	1.50586	0.492896	77	1	Myrip	positive regulation of secretion	0.570443
GO:0007067	1.48604	0.49738	78	1	Pdgfb	mitosis	0.570712
GO:0043547	1.48604	0.49738	78	1	Rasa4	positive regulation of GTPase activity	0.570712
GO:0050900	1.48604	0.49738	78	1	Pdgfb	leukocyte migration	0.570712
GO:0060271	1.48604	0.49738	78	1	Tctn2	cilium morphogenesis	0.570712
GO:2000027	1.46673	0.501825	79	1	Lgr4	regulation of organ morphogenesis	0.574584
GO:0071396	1.4479	0.506231	80	1	Crhbp	cellular response to lipid	0.578396
GO:0007611	1.42955	0.510599	81	1	Fgf13	learning or memory	0.582148
GO:0006874	1.41165	0.514929	82	1	Clec4b1	cellular calcium ion homeostasis	0.584602
GO:0007249	1.41165	0.514929	82	1	Irak1bp1	I-kappaB kinase/NF-kappaB cascade	0.584602
GO:0006644	1.39419	0.519222	83	1	Pdgfb	phospholipid metabolic process	0.585761
GO:0043434	1.39419	0.519222	83	1	Crhbp	response to peptide hormone stimulus	0.585761
GO:0050890	1.39419	0.519222	83	1	Fgf13	cognition	0.585761
GO:0000209	1.37715	0.523477	84	1	Birc2	protein polyubiquitination	0.586863
GO:0002573	1.37715	0.523477	84	1	Inpp5d	myeloid leukocyte differentiation	0.586863
GO:0019221	1.37715	0.523477	84	1	Il2ra	cytokine-mediated signaling pathway	0.586863
GO:0072657	1.36053	0.527696	85	1	Fgf13	protein localization to membrane	0.590121
GO:0007059	1.34428	0.531878	86	1	Fmn2	chromosome segregation	0.590121
GO:0030335	1.34428	0.531878	86	1	Pdgfb	positive regulation of cell migration	0.590121
GO:0040029	1.34428	0.531878	86	1	Wtip	regulation of gene expression, epigenetic	0.590121
GO:0055074	1.34428	0.531878	86	1	Clec4b1	calcium ion homeostasis	0.590121
GO:0001819	1.32841	0.536023	87	1	Sema7a	positive regulation of cytokine production	0.591057
GO:0010035	1.32841	0.536023	87	1	Crhbp	response to inorganic substance	0.591057
GO:0042098	1.32841	0.536023	87	1	Il2ra	T cell proliferation	0.591057
GO:0002262	1.3129	0.540133	88	1	Inpp5d	myeloid cell homeostasis	0.594368
GO:0008406	1.29775	0.544207	89	1	Fzd10	gonad development	0.596407
GO:0050678	1.29775	0.544207	89	1	Pdgfb	regulation of epithelial cell proliferation	0.596407
GO:2000147	1.28294	0.548246	90	1	Pdgfb	positive regulation of cell motility	0.599609
GO:0071902	1.25429	0.556218	92	1	Pdgfb	positive regulation of protein serine/threonine kinase activity	0.607092
GO:0040017	1.22688	0.564053	94	1	Pdgfb	positive regulation of locomotion	0.612395
GO:0051272	1.22688	0.564053	94	1	Pdgfb	positive regulation of cellular component movement	0.612395
GO:0006790	1.2136	0.567919	95	1	Tpk1	sulfur compound metabolic process	0.612395
GO:0010638	1.2136	0.567919	95	1	Pdgfb	positive regulation of organelle organization	0.612395
GO:0042060	1.2136	0.567919	95	1	Pdgfb	wound healing	0.612395
GO:0045926	1.2136	0.567919	95	1	Fgf13	negative regulation of growth	0.612395
GO:0007265	1.20061	0.571752	96	1	Rasa4	Ras protein signal transduction	0.614062
GO:0007346	1.20061	0.571752	96	1	Pdgfb	regulation of mitotic cell cycle	0.614062
GO:0001667	1.18789	0.575551	97	1	Pdgfb	ameboidal cell migration	0.615679
GO:0050878	1.18789	0.575551	97	1	Pdgfb	regulation of body fluid levels	0.615679
GO:0002764	1.17543	0.579318	98	1	Trat1	immune response-regulating signaling pathway	0.617551
GO:0021537	1.16323	0.583051	99	1	Fgf13	telencephalon development	0.617551
GO:0035264	1.16323	0.583051	99	1	Spr	multicellular organism growth	0.617551
GO:0046777	1.16323	0.583051	99	1	Pdgfb	protein autophosphorylation	0.617551
GO:0048871	1.16323	0.583051	99	1	Inpp5d	multicellular organismal homeostasis	0.617551
GO:0046578	1.13955	0.590422	101	1	Rasa4	regulation of Ras protein signal transduction	0.624127
GO:0007015	1.11681	0.597664	103	1	Mtss1	actin filament organization	0.625707
GO:0032870	1.11681	0.597664	103	1	Crhbp	cellular response to hormone stimulus	0.625707
GO:0061448	1.11681	0.597664	103	1	Pdgfb	connective tissue development	0.625707
GO:0002253	1.10576	0.601238	104	1	Trat1	activation of immune response	0.625707
GO:0002460	1.10576	0.601238	104	1	Inpp5d	adaptive immune response based on somatic recombination of immune receptors built from immunoglobulin superfamily domains	0.625707
GO:0030324	1.10576	0.601238	104	1	Rab3a	lung development	0.625707
GO:0045165	1.10576	0.601238	104	1	Fgf13	cell fate commitment	0.625707
GO:0048754	1.10576	0.601238	104	1	Lgr4	branching morphogenesis of a tube	0.625707
GO:0007626	1.09493	0.604781	105	1	Sncg	locomotory behavior	0.625756
GO:0043161	1.09493	0.604781	105	1	Birc2	proteasomal ubiquitin-dependent protein catabolic process	0.625756
GO:0051056	1.09493	0.604781	105	1	Rasa4	regulation of small GTPase mediated signal transduction	0.625756
GO:0009952	1.0843	0.608293	106	1	Mllt3	anterior/posterior pattern specification	0.62818
GO:0030323	1.07386	0.611775	107	1	Rab3a	respiratory tube development	0.630562
GO:0010498	1.06363	0.615226	108	1	Birc2	proteasomal protein catabolic process	0.631695
GO:0071417	1.06363	0.615226	108	1	Crhbp	cellular response to organic nitrogen	0.631695
GO:0006875	1.04378	0.622038	110	1	Clec4b1	cellular metal ion homeostasis	0.636256
GO:0043087	1.04378	0.622038	110	1	Rasa4	regulation of GTPase activity	0.636256
GO:0033124	1.0341	0.6254	111	1	Rasa4	regulation of GTP catabolic process	0.637267
GO:0055114	1.0341	0.6254	111	1	Dyrk2	oxidation-reduction process	0.637267
GO:0051347	1.42041	0.654072	164	2	Pdgfb,Cacul1	positive regulation of transferase activity	0.665221
GO:0000226	1.37663	0.658941	169	2	Fmn2,Fgf13	microtubule cytoskeleton organization	0.666387
GO:0001655	1.37663	0.658941	169	2	Pdgfb,Lgr4	urogenital system development	0.666387
GO:0045664	1.37663	0.658941	169	2	Fgf13,Sema7a	regulation of neuron differentiation	0.666387
GO:0005975	1.30409	0.668289	178	2	Pdgfb,Dyrk2	carbohydrate metabolic process	0.67457
GO:0001817	1.24555	0.677116	186	2	Inpp5d,Sema7a	regulation of cytokine production	0.682198
GO:0001934	1.15449	0.693421	200	2	Pdgfb,Cacul1	positive regulation of protein phosphorylation	0.697317
GO:0002250	1.01525	1	113	1	Inpp5d	adaptive immune response	1
GO:0006520	1.00608	1	114	1	Spr	cellular amino acid metabolic process	1
GO:0010564	1.01525	1	113	1	Pdgfb	regulation of cell cycle process	1

## Sheet: component 5 negative
	odds.ratio	p.value	n.categoy	n.category.and.component	genes	description	FDR
GO:0010092	7.94535	0.00126732	16	5	Wnt2,Frs2,Pax8,Foxh1,Six1	specification of organ identity	0.611045
GO:0009615	3.13454	0.00188588	73	11	Lyst,Cd86,Mx2,Xpr1,Itch,Adar,Il15,Myd88,Mst1r,Ccl5,Ifnlr1	response to virus	0.611045
GO:0043010	2.33013	0.00376759	138	16	Bmp7,Prox1,Gata3,Cep290,Frs2,Pde6a,Abi2,Sp3,Nphp1,Foxp2,Rs1,Ephb1,Tulp1,Cdon,Lamb2,Acvr2b	camera-type eye development	0.611045
GO:0048645	4.56541	0.00419984	29	6	Bmp7,Wnt2,Frs2,Pax8,Foxh1,Six1	organ formation	0.611045
GO:0060041	3.10342	0.00494776	60	9	Prox1,Cep290,Pde6a,Nphp1,Rs1,Tulp1,Cdon,Lamb2,Acvr2b	retina development in camera-type eye	0.611045
GO:0035270	3.2658	0.00600949	51	8	Gata2,Gata3,Hnf4g,Pitx1,Pax8,Rfx3,Six1,Insm1	endocrine system development	0.611045
GO:0048515	3.11954	0.00760818	53	8	Rec8,Ybx2,Ube2b,Nphp1,Catsperb,Insl6,Mei1,Acrbp	spermatid differentiation	0.611045
GO:0001654	2.08097	0.00812974	162	17	Ctns,Bmp7,Prox1,Gata3,Cep290,Frs2,Pde6a,Abi2,Sp3,Nphp1,Foxp2,Rs1,Ephb1,Tulp1,Cdon,Lamb2,Acvr2b	eye development	0.611045
GO:0045995	3.40633	0.00813388	43	7	Bmp7,Wnt2,Gata3,Ccsap,Amot,Six1,Nrk	regulation of embryonic development	0.611045
GO:0050873	4.59371	0.00859427	24	5	Lamb3,Pex11a,Adrb1,Lrg1,Selenbp1	brown fat cell differentiation	0.611045
GO:0015698	5.8064	0.00953218	16	4	Glra1,Ano7,Wnk4,Tg	inorganic anion transport	0.611045
GO:0048596	5.8064	0.00953218	16	4	Bmp7,Prox1,Frs2,Sp3	embryonic camera-type eye morphogenesis	0.611045
GO:0006939	4.155	0.0121607	26	5	Htr2b,P2rx3,Edn2,F2r,Tpcn2	smooth muscle contraction	0.611045
GO:0010463	4.155	0.0121607	26	5	Bmp7,Wnt2,Foxp2,Arhgap5,Six1	mesenchymal cell proliferation	0.611045
GO:0035909	7.44802	0.0146719	10	3	Prox1,Foxh1,Six1	aorta morphogenesis	0.611045
GO:0003156	4.97568	0.0146992	18	4	Bmp7,Wnt2,Frs2,Six1	regulation of organ formation	0.611045
GO:0048592	2.54766	0.0147349	71	9	Bmp7,Prox1,Cep290,Frs2,Sp3,Rs1,Ephb1,Tulp1,Cdon	eye morphogenesis	0.611045
GO:0007286	2.84826	0.018198	50	7	Rec8,Ybx2,Ube2b,Catsperb,Insl6,Mei1,Acrbp	spermatid development	0.611045
GO:0010952	2.84826	0.018198	50	7	Aifm3,Bcl10,Casp9,Apopt1,F2r,S100a9,Acrbp	positive regulation of peptidase activity	0.611045
GO:0048593	2.84826	0.018198	50	7	Bmp7,Prox1,Frs2,Sp3,Rs1,Ephb1,Cdon	camera-type eye morphogenesis	0.611045
GO:0009306	2.42876	0.0189601	74	9	Gata3,Lyst,Htr2b,Steap3,Dnajc1,Exph5,S100a13,F2r,Agtr1a	protein secretion	0.611045
GO:0043281	2.59531	0.0189805	62	8	Aifm3,Xiap,Ifi202b,Bcl10,Casp9,Apopt1,F2r,S100a9	regulation of cysteine-type endopeptidase activity involved in apoptotic process	0.611045
GO:0046631	2.59531	0.0189805	62	8	Gata3,Gadd45g,Bcl6,Itch,Il15,Fut7,Txk,H2-Ab1	alpha-beta T cell activation	0.611045
GO:0001759	6.51501	0.0193681	11	3	Wnt2,Frs2,Six1	organ induction	0.611045
GO:0003081	6.51501	0.0193681	11	3	Ndst2,F2r,Agtr1a	regulation of systemic arterial blood pressure by renin-angiotensin	0.611045
GO:0006821	6.51501	0.0193681	11	3	Glra1,Ano7,Wnk4	chloride transport	0.611045
GO:0048745	6.51501	0.0193681	11	3	Prox1,Foxp2,Six1	smooth muscle tissue development	0.611045
GO:0007586	4.3523	0.0213537	20	4	Vdr,Cyp39a1,Pnliprp2,Wnk4	digestion	0.611045
GO:0048048	4.3523	0.0213537	20	4	Bmp7,Prox1,Frs2,Sp3	embryonic eye morphogenesis	0.611045
GO:0043280	2.99393	0.022935	41	6	Aifm3,Bcl10,Casp9,Apopt1,F2r,S100a9	positive regulation of cysteine-type endopeptidase activity involved in apoptotic process	0.611045
GO:0001709	5.79064	0.0247957	12	3	Prox1,Gata2,Gata3	cell fate determination	0.611045
GO:0031102	5.79064	0.0247957	12	3	Tnr,Matn2,Lamb2	neuron projection regeneration	0.611045
GO:0051341	5.79064	0.0247957	12	3	Vdr,Htr2b,Edn2	regulation of oxidoreductase activity	0.611045
GO:0030101	3.35302	0.0251382	31	5	Lyst,Sp3,Klrb1c,Il15,Sh2d1b2	natural killer cell activation	0.611045
GO:0002053	4.09578	0.0252702	21	4	Wnt2,Foxp2,Arhgap5,Six1	positive regulation of mesenchymal cell proliferation	0.611045
GO:2001056	2.91025	0.0255682	42	6	Aifm3,Bcl10,Casp9,Apopt1,F2r,S100a9	positive regulation of cysteine-type endopeptidase activity	0.611045
GO:0006816	2.12414	0.0261292	102	11	Cacna1e,Homer1,Stc2,Vdr,Htr2b,Casq2,Nos3,Trpc6,Nfatc1,F2r,Tpcn2	calcium ion transport	0.611045
GO:0051924	2.83109	0.0283954	43	6	Homer1,Stc2,Casq2,Nos3,Trpc6,F2r	regulation of calcium ion transport	0.611045
GO:0000186	5.21065	0.0309546	13	3	Gadd45g,F2r,Nrk	activation of MAPKK activity	0.611045
GO:0007141	5.21065	0.0309546	13	3	Rec8,Brdt,Mei1	male meiosis I	0.611045
GO:0021533	5.21065	0.0309546	13	3	Prox1,Gata2,Kndc1	cell differentiation in hindbrain	0.611045
GO:0045214	5.21065	0.0309546	13	3	Prox1,Neb,Neurl2	sarcomere organization	0.611045
GO:0060561	5.21065	0.0309546	13	3	Bmp7,Vdr,Pax8	apoptotic process involved in morphogenesis	0.611045
GO:0072080	5.21065	0.0309546	13	3	Gata3,Pax8,Six1	nephron tubule development	0.611045
GO:0006936	2.33334	0.0313222	68	8	Glra1,Homer1,Htr2b,P2rx3,Casq2,Edn2,F2r,Tpcn2	muscle contraction	0.611045
GO:0010950	2.7561	0.0314214	44	6	Aifm3,Bcl10,Casp9,Apopt1,F2r,S100a9	positive regulation of endopeptidase activity	0.611045
GO:0051607	2.7561	0.0314214	44	6	Lyst,Cd86,Itch,Il15,Ccl5,Ifnlr1	defense response to virus	0.611045
GO:0006520	2.06998	0.0332561	114	12	Tat,Gnmt,Slc1a3,Tph2,Vnn3,Serinc5,Oplah,Pax8,Azin2,Ido2,Aldh5a1,Tg	cellular amino acid metabolic process	0.628787
GO:0052547	2.11329	0.0351694	93	10	Aifm3,Xiap,Ifi202b,Bcl10,Casp9,Apopt1,Serpinb6b,F2r,S100a9,Acrbp	regulation of peptidase activity	0.628787
GO:0003073	3.0046	0.0360485	34	5	Plcb3,Adrb1,Ndst2,F2r,Agtr1a	regulation of systemic arterial blood pressure	0.628787
GO:0006919	3.0046	0.0360485	34	5	Aifm3,Bcl10,Casp9,F2r,S100a9	activation of cysteine-type endopeptidase activity involved in apoptotic process	0.628787
GO:0007264	1.99037	0.0370049	118	12	Bcl6,Arhgef9,Ralgapb,Rasa3,Vav3,Farp2,Dok3,Cdon,Cdc42ep4,Amot,F2r,Rap2c	small GTPase mediated signal transduction	0.628787
GO:0003012	2.28627	0.0378113	78	9	Glra1,Homer1,Htr2b,P2rx3,Casq2,Edn2,Nos3,F2r,Tpcn2	muscle system process	0.628787
GO:0031641	4.73727	0.0378373	14	3	Ypel1,Wasf3,Tg	regulation of myelination	0.628787
GO:0060216	4.73727	0.0378373	14	3	Gata2,Sp3,Hoxb4	definitive hemopoiesis	0.628787
GO:0007140	3.47956	0.0394685	24	4	Rec8,Brdt,Spdya,Mei1	male meiosis	0.63288
GO:0010464	3.47956	0.0394685	24	4	Wnt2,Foxp2,Arhgap5,Six1	regulation of mesenchymal cell proliferation	0.63288
GO:0031076	3.31331	0.0450297	25	4	Bmp7,Prox1,Frs2,Sp3	embryonic camera-type eye development	0.680707
GO:0048265	4.34131	0.0454301	15	3	Cacna1e,P2rx3,Vwa1	response to pain	0.680707
GO:0048678	4.34131	0.0454301	15	3	Tnr,Matn2,Lamb2	response to axon injury	0.680707
GO:0060428	4.34131	0.0454301	15	3	Wnt2,Errfi1,Foxp2	lung epithelium development	0.680707
GO:0051251	2.01162	0.0481963	107	11	Icosl,Gata3,Lyst,Bcl6,Cd4,Bcl10,Cd38,Il15,Myd88,Vnn1,H2-Ab1	positive regulation of lymphocyte activation	0.695083
GO:0001656	2.7216	0.0494828	37	5	Bmp7,Gata3,Pax8,Six1,Lamb2	metanephros development	0.695083
GO:0003341	4.00701	0.0537142	16	3	Ccsap,Ofd1,Rfx3	cilium movement	0.695083
GO:0030317	4.00701	0.0537142	16	3	Cacna1e,Gas8,Insl6	sperm motility	0.695083
GO:0007565	2.37787	0.0539554	50	6	Endou,Vdr,Sp3,Reck,Stox2,Ubtfl1	female pregnancy	0.695083
GO:0008277	2.63843	0.0545339	38	5	Dynlt1c,Htr2b,Syp,Gpr158,Rgs13	regulation of G-protein coupled receptor protein signaling pathway	0.695083
GO:0045087	1.8912	0.0568138	113	11	Cd86,Mx2,Ifi202b,Bcl10,Klrb1c,Myd88,Vnn1,Trafd1,Defb1,H2-Ab1,Sh2d1b2	innate immune response	0.695083
GO:0003281	3.02418	0.0573944	27	4	Prox1,Gata3,Frs2,Dand5	ventricular septum development	0.695083
GO:0007528	3.02418	0.0573944	27	4	Col4a5,F2r,Six1,Lamb2	neuromuscular junction development	0.695083
GO:0051209	3.02418	0.0573944	27	4	Htr2b,Casq2,F2r,Tpcn2	release of sequestered calcium ion into cytosol	0.695083
GO:0001764	2.1518	0.0609919	73	8	D130043K22Rik,Gata3,Matn2,Celsr3,Mark1,Kirrel3,Dcdc2a,Pomk	neuron migration	0.695083
GO:0006334	3.71982	0.0626665	17	3	Hist1h4j,Hist1h4n,Hist1h4m	nucleosome assembly	0.695083
GO:0032814	3.71982	0.0626665	17	3	Lyst,Il15,Sh2d1b2	regulation of natural killer cell activation	0.695083
GO:0045069	3.71982	0.0626665	17	3	Mx2,Adar,Ccl5	regulation of viral genome replication	0.695083
GO:0050688	3.71982	0.0626665	17	3	Itch,Il15,Ccl5	regulation of defense response to virus	0.695083
GO:0060042	3.71982	0.0626665	17	3	Prox1,Rs1,Cdon	retina morphogenesis in camera-type eye	0.695083
GO:0007127	2.27349	0.0631926	52	6	Rec8,Ube2b,Pms1,Brdt,Prdm9,Mei1	meiosis I	0.695083
GO:0007186	1.75862	0.0686581	154	14	Glra1,Dynlt1c,Homer1,Gng4,Htr2b,Syp,Rs1,Adrb1,P2ry12,Gpr158,F2r,Agtr1a,Mrgpra1,Rgs13	G-protein coupled receptor signaling pathway	0.695083
GO:0007281	1.92466	0.0712108	101	10	Rec8,Ybx2,Ube2b,Gpr149,Catsperb,Kmt2d,Insl6,Zbtb16,Mei1,Acrbp	germ cell development	0.695083
GO:0035019	2.7813	0.0713888	29	4	Bmp7,Gata2,Pax8,Zhx2	somatic stem cell maintenance	0.695083
GO:0060840	2.7813	0.0713888	29	4	Prox1,Foxh1,Six1,Acvr2b	artery development	0.695083
GO:0009266	2.41735	0.0714105	41	5	Htr2b,P2rx3,Ephb1,Adrb1,Trpv3	response to temperature stimulus	0.695083
GO:0030856	2.41735	0.0714105	41	5	Gata3,Pax8,Errfi1,Rfx3,Maff	regulation of epithelial cell differentiation	0.695083
GO:0031638	2.41735	0.0714105	41	5	Aifm3,Bcl10,Casp9,F2r,S100a9	zymogen activation	0.695083
GO:0043270	2.41735	0.0714105	41	5	Homer1,Pink1,Trpc6,P2ry12,F2r	positive regulation of ion transport	0.695083
GO:0019079	3.47143	0.0722599	18	3	Mx2,Adar,Ccl5	viral genome replication	0.695083
GO:0030239	3.47143	0.0722599	18	3	Prox1,Neb,Neurl2	myofibril assembly	0.695083
GO:0031128	3.47143	0.0722599	18	3	Wnt2,Frs2,Six1	developmental induction	0.695083
GO:0060993	3.47143	0.0722599	18	3	Bmp7,Pax8,Six1	kidney morphogenesis	0.695083
GO:0061005	3.47143	0.0722599	18	3	Gata3,Pax8,Lamb2	cell differentiation involved in kidney development	0.695083
GO:0045444	1.90339	0.0729583	102	10	Steap4,Gata2,Lamb3,Pex11a,Crebl2,Adrb1,Lrg1,Creb5,Zbtb16,Selenbp1	fat cell differentiation	0.695083
GO:0045165	1.86223	0.0769152	104	10	Prox1,Wnt2,Gata2,Gata3,Frs2,Pitx1,Eomes,Cdon,Olig1,Six1	cell fate commitment	0.695083
GO:0033555	2.67366	0.0789807	30	4	Cacna1e,P2rx3,Adrb1,Vwa1	multicellular organismal response to stress	0.695083
GO:0043367	2.67366	0.0789807	30	4	Gata3,Gadd45g,Bcl6,Fut7	CD4-positive, alpha-beta T cell differentiation	0.695083
GO:0048469	2.22187	0.0812795	62	7	Rec8,Gata2,Gata3,Il15,Farp2,Rfx3,Catsperb	cell maturation	0.695083
GO:0007159	3.25395	0.0824649	19	3	Ccl5,Chst4,S100a9	leukocyte cell-cell adhesion	0.695083
GO:0007200	3.25395	0.0824649	19	3	Htr2b,F2r,Agtr1a	phospholipase C-activating G-protein coupled receptor signaling pathway	0.695083
GO:0021696	3.25395	0.0824649	19	3	Prox1,Rfx4,Kndc1	cerebellar cortex morphogenesis	0.695083
GO:0031018	3.25395	0.0824649	19	3	Hnf4g,Rfx3,Insm1	endocrine pancreas development	0.695083
GO:0032633	3.25395	0.0824649	19	3	Icosl,Gata3,Txk	interleukin-4 production	0.695083
GO:0050663	2.28933	0.0840804	43	5	Gata3,Htr2b,S100a13,F2r,Agtr1a	cytokine secretion	0.695083
GO:0007611	1.91317	0.084559	81	8	Cacna1e,Ctns,Tnr,Amph,Adcy8,Abi2,Foxp2,Pomk	learning or memory	0.695083
GO:0014065	2.57433	0.0869574	31	4	Gata3,Htr2b,Ccl5,F2r	phosphatidylinositol 3-kinase cascade	0.695083
GO:0019233	2.57433	0.0869574	31	4	Cacna1e,Ephb1,Pomk,F2r	sensory perception of pain	0.695083
GO:0035710	2.57433	0.0869574	31	4	Gata3,Gadd45g,Bcl6,Fut7	CD4-positive, alpha-beta T cell activation	0.695083
GO:0048477	2.57433	0.0869574	31	4	Rec8,Ybx2,Gpr149,Kmt2d	oogenesis	0.695083
GO:2000648	2.57433	0.0869574	31	4	Wnt2,Foxp2,Arhgap5,Six1	positive regulation of stem cell proliferation	0.695083
GO:0007204	2.23011	0.0908315	44	5	Htr2b,Casq2,Trpc6,F2r,Tpcn2	elevation of cytosolic calcium ion concentration	0.695083
GO:0010623	3.06205	0.0932492	20	3	Bmp7,Vdr,Pax8	developmental programmed cell death	0.695083
GO:0031032	3.06205	0.0932492	20	3	Prox1,Neb,Neurl2	actomyosin structure organization	0.695083
GO:0042461	3.06205	0.0932492	20	3	Cep290,Nphp1,Tulp1	photoreceptor cell development	0.695083
GO:0051568	3.06205	0.0932492	20	3	Gata3,Kmt2d,Prdm9	histone H3-K4 methylation	0.695083
GO:0051928	3.06205	0.0932492	20	3	Homer1,Trpc6,F2r	positive regulation of calcium ion transport	0.695083
GO:0048562	1.70232	0.0938871	147	13	Bmp7,Prox1,Fuz,Gata2,Gata3,Cep290,Frs2,Pax8,Sp3,Foxh1,Hoxb4,Six1,Hoxc4	embryonic organ morphogenesis	0.695083
GO:0031016	2.482	0.0953083	32	4	Hnf4g,Rfx3,Acvr2b,Insm1	pancreas development	0.695083
GO:0050714	2.482	0.0953083	32	4	Htr2b,Exph5,F2r,Agtr1a	positive regulation of protein secretion	0.695083
GO:0060401	2.482	0.0953083	32	4	Htr2b,Casq2,F2r,Tpcn2	cytosolic calcium ion transport	0.695083
GO:0060402	2.482	0.0953083	32	4	Htr2b,Casq2,F2r,Tpcn2	calcium ion transport into cytosol	0.695083
GO:0060688	2.482	0.0953083	32	4	Bmp7,Wnt2,Pax8,Six1	regulation of morphogenesis of a branching structure	0.695083
GO:0007519	2.0012	0.0983771	68	7	Cav2,Homer1,Pitx1,Megf10,Foxp2,Cdon,Six1	skeletal muscle tissue development	0.695083
GO:0060538	2.0012	0.0983771	68	7	Cav2,Homer1,Pitx1,Megf10,Foxp2,Cdon,Six1	skeletal muscle organ development	0.695083
GO:0002026	4.3304	0.100754	10	2	Nos3,Adrb1	regulation of the force of heart contraction	0.695083
GO:0007616	4.3304	0.100754	10	2	Ctns,Adcy8	long-term memory	0.695083
GO:0031103	4.3304	0.100754	10	2	Tnr,Lamb2	axon regeneration	0.695083
GO:0042119	4.3304	0.100754	10	2	Pram1,Ccl5	neutrophil activation	0.695083
GO:0045777	4.3304	0.100754	10	2	Adrb1,Agtr1a	positive regulation of blood pressure	0.695083
GO:0046636	4.3304	0.100754	10	2	Bcl6,Itch	negative regulation of alpha-beta T cell activation	0.695083
GO:0002292	2.89146	0.104579	21	3	Gata3,Gadd45g,Bcl6	T cell differentiation involved in immune response	0.695083
GO:0021545	2.89146	0.104579	21	3	Slc1a3,Ephb1,Six1	cranial nerve development	0.695083
GO:0032642	2.89146	0.104579	21	3	Mpl,Myd88,Ackr1	regulation of chemokine production	0.695083
GO:0042093	2.89146	0.104579	21	3	Gata3,Gadd45g,Bcl6	T-helper cell differentiation	0.695083
GO:0045058	2.89146	0.104579	21	3	Gata3,Cd4,Il15	T cell selection	0.695083
GO:0030217	1.7035	0.106487	124	11	Gata3,Hs1bp3,Gadd45g,Bcl6,Cd4,Sp3,Il15,Fut7,Vnn1,Flt3,Txk	T cell differentiation	0.695083
GO:0050863	1.7035	0.106487	124	11	Icosl,Gata3,Bcl6,Cd4,Itch,Bcl10,Il15,Ccl5,Vnn1,H2-Ab1,Slfn1	regulation of T cell activation	0.695083
GO:0051046	1.60395	0.107423	155	13	Cacna1e,Htr2b,Dnajc1,Pax8,Pink1,Sirt4,Pram1,Lgi3,Exph5,Wnk4,Rfx3,F2r,Agtr1a	regulation of secretion	0.695083
GO:0003279	2.31578	0.113085	34	4	Prox1,Gata3,Frs2,Dand5	cardiac septum development	0.695083
GO:0001934	1.52665	0.113242	200	16	Bmp7,Frs2,Gadd45g,Cd4,Nox4,Crebl2,Card10,Ccl5,Cdon,F2r,Rap2c,Spdya,Nrk,Acvr2b,Kndc1,Sh2d1b2	positive regulation of protein phosphorylation	0.695083
GO:0055001	1.87672	0.114729	72	7	Cav2,Homer1,Prox1,Megf10,Neb,Cdon,Neurl2	muscle cell development	0.695083
GO:0002287	2.73885	0.116419	22	3	Gata3,Gadd45g,Bcl6	alpha-beta T cell activation involved in immune response	0.695083
GO:0007131	2.73885	0.116419	22	3	Ube2b,Pms1,Prdm9	reciprocal meiotic recombination	0.695083
GO:0001539	3.84829	0.118839	11	2	Ccsap,Rfx3	ciliary or flagellar motility	0.695083
GO:0006536	3.84829	0.118839	11	2	Slc1a3,Aldh5a1	glutamate metabolic process	0.695083
GO:0007602	3.84829	0.118839	11	2	Rs1,Tulp1	phototransduction	0.695083
GO:0010657	3.84829	0.118839	11	2	Apopt1,Agtr1a	muscle cell apoptotic process	0.695083
GO:0010822	3.84829	0.118839	11	2	Apopt1,Bmf	positive regulation of mitochondrion organization	0.695083
GO:0021602	3.84829	0.118839	11	2	Ephb1,Six1	cranial nerve morphogenesis	0.695083
GO:0022408	3.84829	0.118839	11	2	B4galnt2,Tnr	negative regulation of cell-cell adhesion	0.695083
GO:0031623	3.84829	0.118839	11	2	Htr2b,Sh3gl2	receptor internalization	0.695083
GO:0035914	3.84829	0.118839	11	2	Megf10,Cdon	skeletal muscle cell differentiation	0.695083
GO:0045071	3.84829	0.118839	11	2	Mx2,Ccl5	negative regulation of viral genome replication	0.695083
GO:0045604	3.84829	0.118839	11	2	Errfi1,Maff	regulation of epidermal cell differentiation	0.695083
GO:0051279	3.84829	0.118839	11	2	Casq2,F2r	regulation of release of sequestered calcium ion into cytosol	0.695083
GO:0060004	3.84829	0.118839	11	2	Glra1,Foxp2	reflex	0.695083
GO:0060442	3.84829	0.118839	11	2	Bmp7,Frs2	branching involved in prostate gland morphogenesis	0.695083
GO:0006184	1.58385	0.119163	169	14	Rab5b,Evi5l,Rab37,Gng4,Bcl6,Mx2,Tiam2,Htr2b,Ralgapb,Rab13,Rasa3,Vav3,Amot,Rgs13	GTP catabolic process	0.695083
GO:0016358	1.84777	0.119396	73	7	D130043K22Rik,Matn2,Abi2,Ephb1,Dcdc2a,Tulp1,Kndc1	dendrite development	0.695083
GO:0019226	1.8199	0.124285	74	7	Glra1,Cacna1e,Tnr,Serinc5,Ypel1,Wasf3,Tg	transmission of nerve impulse	0.706518
GO:0001702	2.60137	0.128734	23	3	Frs2,Amot,Acvr2b	gastrulation with mouth forming second	0.706518
GO:0050806	2.60137	0.128734	23	3	Slc1a3,Tnr,Pink1	positive regulation of synaptic transmission	0.706518
GO:0050777	2.17021	0.132204	36	4	Bcl6,Ifi202b,Trafd1,Sh2d1b2	negative regulation of immune response	0.706518
GO:0050890	1.86151	0.136114	83	8	Cacna1e,Ctns,Tnr,Amph,Adcy8,Abi2,Foxp2,Pomk	cognition	0.706518
GO:0001945	3.46335	0.137648	12	2	Prox1,Acvr2b	lymph vessel development	0.706518
GO:0002320	3.46335	0.137648	12	2	Gata3,Flt3	lymphoid progenitor cell differentiation	0.706518
GO:0002446	3.46335	0.137648	12	2	Lyst,Pram1	neutrophil mediated immunity	0.706518
GO:0006693	3.46335	0.137648	12	2	Edn2,Ptges	prostaglandin metabolic process	0.706518
GO:0007128	3.46335	0.137648	12	2	Insl6,Prdm9	meiotic prophase I	0.706518
GO:0007340	3.46335	0.137648	12	2	Glra1,Plcd4	acrosome reaction	0.706518
GO:0010977	3.46335	0.137648	12	2	D130043K22Rik,Tnr	negative regulation of neuron projection development	0.706518
GO:0014812	3.46335	0.137648	12	2	Ccl5,Six1	muscle cell migration	0.706518
GO:0021697	3.46335	0.137648	12	2	Prox1,Kndc1	cerebellar cortex formation	0.706518
GO:0030204	3.46335	0.137648	12	2	Mamdc2,Spock2	chondroitin sulfate metabolic process	0.706518
GO:0032816	3.46335	0.137648	12	2	Lyst,Il15	positive regulation of natural killer cell activation	0.706518
GO:0035458	3.46335	0.137648	12	2	Ifi202b,Pyhin1	cellular response to interferon-beta	0.706518
GO:0045744	3.46335	0.137648	12	2	Htr2b,Rgs13	negative regulation of G-protein coupled receptor protein signaling pathway	0.706518
GO:0048857	3.46335	0.137648	12	2	Foxp2,Kirrel3	neural nucleus development	0.706518
GO:0060841	3.46335	0.137648	12	2	Prox1,Acvr2b	venous blood vessel development	0.706518
GO:0060326	1.9707	0.13768	59	6	Il16,Lyst,Csf3r,Ephb1,Ccl5,S100a9	cell chemotaxis	0.706518
GO:0009063	2.47714	0.141486	24	3	Tat,Ido2,Aldh5a1	cellular amino acid catabolic process	0.706518
GO:0034109	2.47714	0.141486	24	3	Megf10,Ccl5,S100a9	homotypic cell-cell adhesion	0.706518
GO:0043648	2.47714	0.141486	24	3	Slc1a3,Me3,Aldh5a1	dicarboxylic acid metabolic process	0.706518
GO:0055002	1.93387	0.142172	60	6	Cav2,Homer1,Prox1,Neb,Cdon,Neurl2	striated muscle cell development	0.706518
GO:0072089	1.93387	0.142172	60	6	Bmp7,Wnt2,Frs2,Foxp2,Arhgap5,Six1	stem cell proliferation	0.706518
GO:0043112	2.10399	0.142231	37	4	Htr2b,Sh3gl2,Vamp3,Mylip	receptor metabolic process	0.706518
GO:0001837	2.04183	0.152549	38	4	Loxl3,Wnt2,Eomes,Nfatc1	epithelial to mesenchymal transition	0.726963
GO:0006814	2.04183	0.152549	38	4	Slc23a1,Nos3,Scnn1a,Slc12a3	sodium ion transport	0.726963
GO:0010817	1.60132	0.153221	119	10	Cacna1e,Hfe,Gata3,Rdh12,Pax8,Sirt4,Ndst2,Rfx3,Tg,Acvr2b	regulation of hormone levels	0.726963
GO:0007338	2.36428	0.154639	25	3	Glra1,Plcd4,Zp3r	single fertilization	0.726963
GO:0021587	2.36428	0.154639	25	3	Prox1,Rfx4,Kndc1	cerebellum morphogenesis	0.726963
GO:0048844	2.36428	0.154639	25	3	Prox1,Foxh1,Six1	artery morphogenesis	0.726963
GO:0050715	2.36428	0.154639	25	3	Htr2b,F2r,Agtr1a	positive regulation of cytokine secretion	0.726963
GO:0002066	3.14805	0.157047	13	2	Rfx3,Insm1	columnar/cuboidal epithelial cell development	0.726963
GO:0003209	3.14805	0.157047	13	2	Prox1,Wnt2	cardiac atrium morphogenesis	0.726963
GO:0009409	3.14805	0.157047	13	2	P2rx3,Adrb1	response to cold	0.726963
GO:0030728	3.14805	0.157047	13	2	Nos3,Gpr149	ovulation	0.726963
GO:0042267	3.14805	0.157047	13	2	Klrb1c,Sh2d1b2	natural killer cell mediated cytotoxicity	0.726963
GO:0046068	3.14805	0.157047	13	2	Htr2b,Gucy1a2	cGMP metabolic process	0.726963
GO:0048771	1.83097	0.157482	63	6	Efna2,Vdr,Nos3,Nox4,F2r,Acvr2b	tissue remodeling	0.726963
GO:0035150	1.98314	0.16314	39	4	Htr2b,Nos3,Adrb1,F2r	regulation of tube size	0.738169
GO:0048015	1.98314	0.16314	39	4	Gata3,Htr2b,Ccl5,F2r	phosphatidylinositol-mediated signaling	0.738169
GO:0050880	1.98314	0.16314	39	4	Htr2b,Nos3,Adrb1,F2r	regulation of blood vessel size	0.738169
GO:0090276	1.98314	0.16314	39	4	Cacna1e,Pax8,Sirt4,Rfx3	regulation of peptide hormone secretion	0.738169
GO:0050766	2.26102	0.168156	26	3	Gata2,Tulp1,Cd47	positive regulation of phagocytosis	0.739725
GO:0030100	1.73852	0.175335	66	6	Rab5b,Gata2,Sh3gl2,Tulp1,Vamp8,Cd47	regulation of endocytosis	0.739725
GO:0002027	2.88528	0.176915	14	2	Cacna1e,Adrb1	regulation of heart rate	0.739725
GO:0006636	2.88528	0.176915	14	2	Edn2,Ptges	unsaturated fatty acid biosynthetic process	0.739725
GO:0006766	2.88528	0.176915	14	2	Vnn3,Vdr	vitamin metabolic process	0.739725
GO:0007032	2.88528	0.176915	14	2	Rab5b,Als2cl	endosome organization	0.739725
GO:0009583	2.88528	0.176915	14	2	Rs1,Tulp1	detection of light stimulus	0.739725
GO:0031952	2.88528	0.176915	14	2	Errfi1,Rap2c	regulation of protein autophosphorylation	0.739725
GO:0035456	2.88528	0.176915	14	2	Ifi202b,Pyhin1	response to interferon-beta	0.739725
GO:0040015	2.88528	0.176915	14	2	Stc2,Adrb1	negative regulation of multicellular organism growth	0.739725
GO:0043666	2.88528	0.176915	14	2	Nuak1,Ppp6r2	regulation of phosphoprotein phosphatase activity	0.739725
GO:0046456	2.88528	0.176915	14	2	Edn2,Ptges	icosanoid biosynthetic process	0.739725
GO:0007600	1.52395	0.181751	137	11	Glra1,Cacna1e,Slc1a3,Otog,P2rx3,Ephb1,Pomk,Reep2,F2r,Six1,Lamb2	sensory perception	0.739725
GO:0000018	2.16637	0.182002	27	3	Ube2b,Bcl6,Prdm9	regulation of DNA recombination	0.739725
GO:0021575	2.16637	0.182002	27	3	Prox1,Rfx4,Kndc1	hindbrain morphogenesis	0.739725
GO:0048741	2.16637	0.182002	27	3	Cav2,Homer1,Cdon	skeletal muscle fiber development	0.739725
GO:0051480	2.0698	0.182586	47	5	Htr2b,Casq2,Trpc6,F2r,Tpcn2	cytosolic calcium ion homeostasis	0.739725
GO:0007292	2.0213	0.186525	48	5	Rec8,Ybx2,Nos3,Gpr149,Kmt2d	female gamete generation	0.739725
GO:0046632	1.97501	0.190923	49	5	Gata3,Gadd45g,Bcl6,Fut7,Txk	alpha-beta T cell differentiation	0.739725
GO:0008217	1.93079	0.195761	50	5	Plcb3,Adrb1,Ndst2,F2r,Agtr1a	regulation of blood pressure	0.739725
GO:0030010	1.93079	0.195761	50	5	Dynlt1c,Gata3,Syne4,Ephb1,Amot	establishment of cell polarity	0.739725
GO:0030595	1.93079	0.195761	50	5	Il16,Lyst,Csf3r,Ccl5,S100a9	leukocyte chemotaxis	0.739725
GO:0050708	1.93079	0.195761	50	5	Htr2b,Dnajc1,Exph5,F2r,Agtr1a	regulation of protein secretion	0.739725
GO:0002286	2.07936	0.196139	28	3	Gata3,Gadd45g,Bcl6	T cell activation involved in immune response	0.739725
GO:0014904	2.07936	0.196139	28	3	Cav2,Homer1,Cdon	myotube cell development	0.739725
GO:0017156	2.07936	0.196139	28	3	Glra1,Plcd4,Vamp3	calcium ion-dependent exocytosis	0.739725
GO:0030203	2.07936	0.196139	28	3	Mamdc2,Ndst2,Spock2	glycosaminoglycan metabolic process	0.739725
GO:0031497	2.07936	0.196139	28	3	Hist1h4j,Hist1h4n,Hist1h4m	chromatin assembly	0.739725
GO:0001829	2.66275	0.197144	15	2	Sp3,Eomes	trophectodermal cell differentiation	0.739725
GO:0001938	2.66275	0.197144	15	2	Cav2,Htr2b	positive regulation of endothelial cell proliferation	0.739725
GO:0006940	2.66275	0.197144	15	2	Edn2,F2r	regulation of smooth muscle contraction	0.739725
GO:0009620	2.66275	0.197144	15	2	Bcl10,Myd88	response to fungus	0.739725
GO:0010522	2.66275	0.197144	15	2	Casq2,F2r	regulation of calcium ion transport into cytosol	0.739725
GO:0040020	2.66275	0.197144	15	2	Ube2b,Prdm9	regulation of meiosis	0.739725
GO:0043271	2.66275	0.197144	15	2	Casq2,Nos3	negative regulation of ion transport	0.739725
GO:0045600	2.66275	0.197144	15	2	Crebl2,Zbtb16	positive regulation of fat cell differentiation	0.739725
GO:0046633	2.66275	0.197144	15	2	Itch,Il15	alpha-beta T cell proliferation	0.739725
GO:0048488	2.66275	0.197144	15	2	Amph,Sh3gl2	synaptic vesicle endocytosis	0.739725
GO:0048660	2.66275	0.197144	15	2	Ndrg2,Ccl5	regulation of smooth muscle cell proliferation	0.739725
GO:0072210	2.66275	0.197144	15	2	Pax8,Lamb2	metanephric nephron development	0.739725
GO:0072384	2.66275	0.197144	15	2	Fyco1,Bicd2	organelle transport along microtubule	0.739725
GO:0050870	1.74097	0.197476	77	7	Icosl,Gata3,Cd4,Bcl10,Il15,Vnn1,H2-Ab1	positive regulation of T cell activation	0.739725
GO:0050900	1.71613	0.200734	78	7	Il16,Lyst,Csf3r,Ccl5,Chst4,Fut7,S100a9	leukocyte migration	0.745076
GO:0050671	1.8885	0.20102	51	5	Icosl,Bcl6,Cd38,Il15,Myd88	positive regulation of lymphocyte proliferation	0.745076
GO:0043087	1.55254	0.202049	110	9	Evi5l,Bcl6,Tiam2,Htr2b,Ralgapb,Rasa3,Vav3,Amot,Rgs13	regulation of GTPase activity	0.745076
GO:0009203	1.42638	0.202165	199	15	Rab5b,Evi5l,Rab37,Gng4,Bcl6,Mx2,Tiam2,Pms1,Htr2b,Ralgapb,Rab13,Rasa3,Vav3,Amot,Rgs13	ribonucleoside triphosphate catabolic process	0.745076
GO:2000027	1.69198	0.204285	79	7	Bmp7,Wnt2,Gata3,Frs2,Pax8,Foxp2,Six1	regulation of organ morphogenesis	0.748885
GO:0006820	1.53702	0.205657	111	9	Glra1,Slc1a3,Ctns,Slc23a1,Slc22a19,Pqlc2,Ano7,Wnk4,Tg	anion transport	0.748885
GO:0033124	1.53702	0.205657	111	9	Evi5l,Bcl6,Tiam2,Htr2b,Ralgapb,Rasa3,Vav3,Amot,Rgs13	regulation of GTP catabolic process	0.748885
GO:0007283	1.465	0.208273	155	12	Rec8,Ybx2,Ube2b,Bcl6,Nphp1,Brdt,Catsperb,Insl6,Prdm9,Zbtb16,Mei1,Acrbp	spermatogenesis	0.750135
GO:0030168	1.99904	0.210533	29	3	Vwf,P2ry12,F2r	platelet activation	0.750135
GO:2000177	1.99904	0.210533	29	3	Prox1,Gata2,Cdon	regulation of neural precursor cell proliferation	0.750135
GO:0048232	1.45455	0.210739	156	12	Rec8,Ybx2,Ube2b,Bcl6,Nphp1,Brdt,Catsperb,Insl6,Prdm9,Zbtb16,Mei1,Acrbp	male gamete generation	0.750135
GO:0042472	1.80906	0.212724	53	5	Gata2,Gata3,Cep290,Pax8,Six1	inner ear morphogenesis	0.750135
GO:0048706	1.80906	0.212724	53	5	Bmp7,Fuz,Sp3,Hoxb4,Six1	embryonic skeletal system development	0.750135
GO:0006874	1.62338	0.216615	82	7	Stc2,Vdr,Htr2b,Casq2,Trpc6,F2r,Tpcn2	cellular calcium ion homeostasis	0.750135
GO:0021953	1.62338	0.216615	82	7	Prox1,Gata2,Eomes,Ephb1,Tctn1,Lingo1,Kndc1	central nervous system neuron differentiation	0.750135
GO:0014068	2.47231	0.217633	16	2	Ccl5,F2r	positive regulation of phosphatidylinositol 3-kinase cascade	0.750135
GO:0030219	2.47231	0.217633	16	2	Gata2,Sp3	megakaryocyte differentiation	0.750135
GO:0042310	2.47231	0.217633	16	2	Htr2b,F2r	vasoconstriction	0.750135
GO:0042596	2.47231	0.217633	16	2	Cacna1e,Adrb1	fear response	0.750135
GO:0048659	2.47231	0.217633	16	2	Ndrg2,Ccl5	smooth muscle cell proliferation	0.750135
GO:0007612	1.77184	0.219131	54	5	Cacna1e,Ctns,Tnr,Amph,Foxp2	learning	0.750135
GO:0030072	1.77184	0.219131	54	5	Cacna1e,Pax8,Sirt4,Rfx3,Acvr2b	peptide hormone secretion	0.750135
GO:0070371	1.77184	0.219131	54	5	Ndrg2,Htr2b,Nox4,Ephb1,F2r	ERK1 and ERK2 cascade	0.750135
GO:0006644	1.60172	0.221254	83	7	Lyst,Serinc5,Plcd4,Htr2b,Pik3r2,Aldh5a1,Pgap3	phospholipid metabolic process	0.751769
GO:0007126	1.60172	0.221254	83	7	Rec8,Ube2b,Pms1,Brdt,Prdm9,Spdya,Mei1	meiosis	0.751769
GO:0021695	1.92469	0.22515	30	3	Prox1,Rfx4,Kndc1	cerebellar cortex development	0.756259
GO:0042089	1.73608	0.225885	55	5	Icosl,Gata3,Gadd45g,Bcl10,Myd88	cytokine biosynthetic process	0.756259
GO:0042107	1.73608	0.225885	55	5	Icosl,Gata3,Gadd45g,Bcl10,Myd88	cytokine metabolic process	0.756259
GO:0048638	1.73608	0.225885	55	5	Prox1,Wnt2,Tnr,Six1,Nrk	regulation of developmental growth	0.756259
GO:0001823	1.70172	0.232966	56	5	Bmp7,Gata3,Pax8,Six1,Zbtb16	mesonephros development	0.757536
GO:0055074	1.54002	0.236634	86	7	Stc2,Vdr,Htr2b,Casq2,Trpc6,F2r,Tpcn2	calcium ion homeostasis	0.757536
GO:0030512	2.30717	0.238296	17	2	Cav2,Dand5	negative regulation of transforming growth factor beta receptor signaling pathway	0.757536
GO:0042462	2.30717	0.238296	17	2	Cep290,Tulp1	eye photoreceptor cell development	0.757536
GO:0046427	2.30717	0.238296	17	2	Ccl5,F2r	positive regulation of JAK-STAT cascade	0.757536
GO:0048525	2.30717	0.238296	17	2	Mx2,Ccl5	negative regulation of viral reproduction	0.757536
GO:0048599	2.30717	0.238296	17	2	Rec8,Kmt2d	oocyte development	0.757536
GO:0048873	2.30717	0.238296	17	2	Gata2,F2r	homeostasis of number of cells within a tissue	0.757536
GO:0051963	2.30717	0.238296	17	2	Ephb1,Six1	regulation of synapse assembly	0.757536
GO:0060420	2.30717	0.238296	17	2	Prox1,Wnt2	regulation of heart growth	0.757536
GO:2000179	2.30717	0.238296	17	2	Prox1,Cdon	positive regulation of neural precursor cell proliferation	0.757536
GO:0006937	1.85548	0.239956	31	3	Casq2,Edn2,F2r	regulation of muscle contraction	0.757536
GO:0032412	1.85548	0.239956	31	3	Homer1,Casq2,Trpc6	regulation of ion transmembrane transporter activity	0.757536
GO:0042108	1.85548	0.239956	31	3	Icosl,Bcl10,Myd88	positive regulation of cytokine biosynthetic process	0.757536
GO:0065004	1.85548	0.239956	31	3	Hist1h4j,Hist1h4n,Hist1h4m	protein-DNA complex assembly	0.757536
GO:0002790	1.66869	0.240356	57	5	Cacna1e,Pax8,Sirt4,Rfx3,Acvr2b	peptide secretion	0.757536
GO:0007368	1.66869	0.240356	57	5	Foxh1,Ofd1,Rfx3,Dand5,Acvr2b	determination of left/right symmetry	0.757536
GO:0003231	1.6369	0.248038	58	5	Prox1,Gata3,Frs2,Foxh1,Dand5	cardiac ventricle development	0.761067
GO:0007517	1.42716	0.249151	132	10	Cav2,Homer1,Prox1,Wnt2,Pitx1,Megf10,Foxp2,Foxh1,Cdon,Six1	muscle organ development	0.761067
GO:0007265	1.58255	0.250463	96	8	Bcl6,Ralgapb,Rasa3,Farp2,Dok3,Cdc42ep4,F2r,Rap2c	Ras protein signal transduction	0.761067
GO:0030198	1.58255	0.250463	96	8	Tnr,Fbln5,Reck,Olfml2b,Vwa1,Lamb2,Spock2,Mia	extracellular matrix organization	0.761067
GO:0060485	1.56448	0.253162	97	8	Loxl3,Bmp7,Wnt2,Htr2b,Eomes,Nfatc1,Six1,Dand5	mesenchyme development	0.761067
GO:0022407	1.79128	0.25492	32	3	B4galnt2,Tnr,Ccl5	regulation of cell-cell adhesion	0.761067
GO:0071621	1.79128	0.25492	32	3	Csf3r,Ccl5,S100a9	granulocyte chemotaxis	0.761067
GO:0051222	1.60628	0.255995	59	5	Htr2b,Exph5,Camk4,F2r,Agtr1a	positive regulation of protein transport	0.761067
GO:0001779	2.16257	0.25905	18	2	Sp3,Il15	natural killer cell differentiation	0.761067
GO:0009994	2.16257	0.25905	18	2	Rec8,Kmt2d	oocyte differentiation	0.761067
GO:0016925	2.16257	0.25905	18	2	Sumo2,Pias3	protein sumoylation	0.761067
GO:0021983	2.16257	0.25905	18	2	Gata2,Pitx1	pituitary gland development	0.761067
GO:0042092	2.16257	0.25905	18	2	Gata3,Bcl6	type 2 immune response	0.761067
GO:0043154	2.16257	0.25905	18	2	Xiap,Ifi202b	negative regulation of cysteine-type endopeptidase activity involved in apoptotic process	0.761067
GO:0043370	2.16257	0.25905	18	2	Gata3,Bcl6	regulation of CD4-positive, alpha-beta T cell differentiation	0.761067
GO:0060571	2.16257	0.25905	18	2	Bmp7,Wnt2	morphogenesis of an epithelial fold	0.761067
GO:2000117	2.16257	0.25905	18	2	Xiap,Ifi202b	negative regulation of cysteine-type endopeptidase activity	0.761067
GO:0046879	1.6548	0.276355	69	6	Cacna1e,Gata3,Pax8,Sirt4,Rfx3,Acvr2b	hormone secretion	0.761067
GO:0006897	1.378	0.277631	150	11	Cav2,Rab5b,Gata2,Amph,Megf10,Htr2b,Sh3gl2,Syp,Tulp1,Vamp8,Cd47	endocytosis	0.761067
GO:0021954	1.92773	0.278024	40	4	Gata2,Ephb1,Tctn1,Lingo1	central nervous system neuron development	0.761067
GO:0048704	1.92773	0.278024	40	4	Bmp7,Fuz,Hoxb4,Six1	embryonic skeletal system morphogenesis	0.761067
GO:0030324	1.44848	0.278825	104	8	Wnt2,Slc23a1,Sp3,Errfi1,Nos3,Foxp2,Nkx2-9,Acvr2b	lung development	0.761067
GO:0007260	2.03502	0.279825	19	2	Ccl5,F2r	tyrosine phosphorylation of STAT protein	0.761067
GO:0007566	2.03502	0.279825	19	2	Reck,Ubtfl1	embryo implantation	0.761067
GO:0017145	2.03502	0.279825	19	2	Hoxb4,Zbtb16	stem cell division	0.761067
GO:0051057	2.03502	0.279825	19	2	Cdon,F2r	positive regulation of small GTPase mediated signal transduction	0.761067
GO:0007018	1.62864	0.280156	70	6	Fyco1,Ap3m2,Ccsap,Bicd2,Ofd1,Rfx3	microtubule-based movement	0.761067
GO:0002244	1.87534	0.28337	41	4	Gata2,Gata3,Sp3,Flt3	hematopoietic progenitor cell differentiation	0.761067
GO:0009743	1.87534	0.28337	41	4	Cacna1e,P2rx3,Nox4,Acvr2b	response to carbohydrate stimulus	0.761067
GO:0072091	1.87534	0.28337	41	4	Wnt2,Foxp2,Arhgap5,Six1	regulation of stem cell proliferation	0.761067
GO:2000021	1.87534	0.28337	41	4	Htr2b,Casq2,F2r,Tpcn2	regulation of ion homeostasis	0.761067
GO:0051056	1.43328	0.283374	105	8	Evi5l,Bcl6,Htr2b,Ralgapb,Rasa3,Cdon,Amot,F2r	regulation of small GTPase mediated signal transduction	0.761067
GO:0051146	1.43328	0.283374	105	8	Cav2,Homer1,Prox1,Cdh2,Neb,Cdon,Neurl2,Ppapdc3	striated muscle cell differentiation	0.761067
GO:0006650	1.60328	0.284294	71	6	Serinc5,Plcd4,Htr2b,Pik3r2,Aldh5a1,Pgap3	glycerophospholipid metabolic process	0.761067
GO:0048762	1.60328	0.284294	71	6	Loxl3,Bmp7,Wnt2,Htr2b,Eomes,Nfatc1	mesenchymal cell differentiation	0.761067
GO:0045088	1.57869	0.288755	72	6	Cd86,Ifi202b,Klrb1c,Myd88,Trafd1,Sh2d1b2	regulation of innate immune response	0.761067
GO:0008016	1.77844	0.295646	43	4	Cacna1e,Casq2,Nos3,Adrb1	regulation of heart contraction	0.761067
GO:0032609	1.77844	0.295646	43	4	Gata3,Gadd45g,Eomes,Txk	interferon-gamma production	0.761067
GO:0043123	1.77844	0.295646	43	4	Htr2b,Bcl10,Myd88,F2r	positive regulation of I-kappaB kinase/NF-kappaB cascade	0.761067
GO:0003002	1.35749	0.298106	166	12	Wnt2,Frs2,Pax8,Foxh1,Cdon,Tctn1,Hoxb4,Pkd1l1,Six1,Acvr2b,Zbtb16,Hoxc4	regionalization	0.761067
GO:0030902	1.53168	0.298596	74	6	Prox1,Gata2,Cep290,Rfx4,Foxp2,Kndc1	hindbrain development	0.761067
GO:0060627	1.44998	0.299512	117	9	Rab5b,Gata2,Sh3gl2,Pram1,Lgi3,Exph5,Tulp1,Vamp8,Cd47	regulation of vesicle-mediated transport	0.761067
GO:0001754	1.92167	0.300556	20	2	Cep290,Tulp1	eye photoreceptor cell differentiation	0.761067
GO:0006342	1.92167	0.300556	20	2	Ube2b,Kmt2d	chromatin silencing	0.761067
GO:0007129	1.92167	0.300556	20	2	Rec8,Ube2b	synapsis	0.761067
GO:0030890	1.92167	0.300556	20	2	Bcl6,Cd38	positive regulation of B cell proliferation	0.761067
GO:0035116	1.92167	0.300556	20	2	Pitx1,Zbtb16	embryonic hindlimb morphogenesis	0.761067
GO:0050798	1.92167	0.300556	20	2	Icosl,Itgad	activated T cell proliferation	0.761067
GO:0060135	1.92167	0.300556	20	2	Vdr,Stox2	maternal process involved in female pregnancy	0.761067
GO:0061097	1.92167	0.300556	20	2	Errfi1,Rap2c	regulation of protein tyrosine kinase activity	0.761067
GO:0007270	1.73366	0.302508	44	4	Glra1,Tnr,Pink1,Camk4	neuron-neuron synaptic transmission	0.761067
GO:0046488	1.73366	0.302508	44	4	Plcd4,Htr2b,Pik3r2,Pgap3	phosphatidylinositol metabolic process	0.761067
GO:0048489	1.73366	0.302508	44	4	Amph,Sh3gl2,Stx4a,Ap3m2	synaptic vesicle transport	0.761067
GO:0007163	1.50921	0.303949	75	6	Dynlt1c,Gata3,Syne4,Stk25,Ephb1,Amot	establishment or maintenance of cell polarity	0.761067
GO:0001655	1.33078	0.306179	169	12	Bmp7,Gata2,Gata3,Cep290,Frs2,Pax8,Clcnka,Agtr1a,Six1,Lamb2,Acvr2b,Zbtb16	urogenital system development	0.761067
GO:0032147	1.48737	0.309572	76	6	Frs2,Gadd45g,Card10,F2r,Nrk,Acvr2b	activation of protein kinase activity	0.761067
GO:0006914	1.65049	0.317515	46	4	Htr2b,Map1lc3a,S100a9,Atg4a	autophagy	0.761067
GO:0009566	1.65049	0.317515	46	4	Glra1,Plcd4,Zp3r,Insl6	fertilization	0.761067
GO:0021549	1.65049	0.317515	46	4	Prox1,Rfx4,Foxp2,Kndc1	cerebellum development	0.761067
GO:0042035	1.65049	0.317515	46	4	Icosl,Gata3,Bcl10,Myd88	regulation of cytokine biosynthetic process	0.761067
GO:0046883	1.65049	0.317515	46	4	Cacna1e,Pax8,Sirt4,Rfx3	regulation of hormone secretion	0.761067
GO:0050679	1.65049	0.317515	46	4	Cav2,Wnt2,Htr2b,Foxp2	positive regulation of epithelial cell proliferation	0.761067
GO:0051147	1.65049	0.317515	46	4	Prox1,Megf10,Cdon,Ppapdc3	regulation of muscle cell differentiation	0.761067
GO:0050869	1.82014	0.321185	21	2	Bcl6,Flt3	negative regulation of B cell activation	0.761067
GO:2000107	1.82014	0.321185	21	2	Bcl10,Ccl5	negative regulation of leukocyte apoptotic process	0.761067
GO:0043547	1.44551	0.321577	78	6	Evi5l,Tiam2,Htr2b,Ralgapb,Rasa3,Rgs13	positive regulation of GTPase activity	0.761067
GO:0050808	1.44551	0.321577	78	6	Tnr,Col4a5,Ephb1,F2r,Six1,Lamb2	synapse organization	0.761067
GO:0060271	1.44551	0.321577	78	6	Fuz,Cep290,Ube2b,Tctn1,Ofd1,Rfx3	cilium morphogenesis	0.761067
GO:0016064	1.61181	0.325597	47	4	Bcl6,Bcl10,Myd88,H2-Ab1	immunoglobulin mediated immune response	0.761067
GO:0030073	1.61181	0.325597	47	4	Cacna1e,Sirt4,Rfx3,Acvr2b	insulin secretion	0.761067
GO:0070372	1.61181	0.325597	47	4	Ndrg2,Nox4,Ephb1,F2r	regulation of ERK1 and ERK2 cascade	0.761067
GO:0051321	1.50143	0.337299	88	7	Rec8,Ube2b,Pms1,Brdt,Prdm9,Spdya,Mei1	meiotic cell cycle	0.761067
GO:0001822	1.3587	0.341407	138	10	Bmp7,Gata3,Cep290,Pax8,Clcnka,Agtr1a,Six1,Lamb2,Acvr2b,Zbtb16	kidney development	0.761067
GO:0048864	1.3587	0.341407	138	10	Loxl3,Bmp7,Prox1,Wnt2,Gata2,Htr2b,Pax8,Eomes,Nfatc1,Zhx2	stem cell development	0.761067
GO:0001974	1.72886	0.341661	22	2	Nos3,Acvr2b	blood vessel remodeling	0.761067
GO:0021517	1.72886	0.341661	22	2	Gata2,Tctn1	ventral spinal cord development	0.761067
GO:0042088	1.72886	0.341661	22	2	Gadd45g,H2-Ab1	T-helper 1 type immune response	0.761067
GO:0044236	1.72886	0.341661	22	2	Adrb1,F2r	multicellular organismal metabolic process	0.761067
GO:0045446	1.72886	0.341661	22	2	Prox1,Acvr2b	endothelial cell differentiation	0.761067
GO:0045682	1.72886	0.341661	22	2	Errfi1,Maff	regulation of epidermis development	0.761067
GO:0046580	1.72886	0.341661	22	2	Bcl6,Rasa3	negative regulation of Ras protein signal transduction	0.761067
GO:0048483	1.72886	0.341661	22	2	Gata3,Six1	autonomic nervous system development	0.761067
GO:0060512	1.72886	0.341661	22	2	Bmp7,Frs2	prostate gland morphogenesis	0.761067
GO:0060740	1.72886	0.341661	22	2	Bmp7,Frs2	prostate gland epithelium morphogenesis	0.761067
GO:0071333	1.72886	0.341661	22	2	Cacna1e,Nox4	cellular response to glucose stimulus	0.761067
GO:0014902	1.5396	0.34277	49	4	Cav2,Homer1,Cdon,Ppapdc3	myotube differentiation	0.761067
GO:0019724	1.5396	0.34277	49	4	Bcl6,Bcl10,Myd88,H2-Ab1	B cell mediated immunity	0.761067
GO:0072001	1.31653	0.353726	142	10	Bmp7,Gata3,Cep290,Pax8,Clcnka,Agtr1a,Six1,Lamb2,Acvr2b,Zbtb16	renal system development	0.761067
GO:0032320	1.47355	0.361101	51	4	Evi5l,Htr2b,Ralgapb,Rasa3	positive regulation of Ras GTPase activity	0.761067
GO:0042384	1.47355	0.361101	51	4	Fuz,Cep290,Ube2b,Rfx3	cilium assembly	0.761067
GO:0001578	1.64624	0.36194	23	2	Tppp3,Ube2b	microtubule bundle formation	0.761067
GO:0001825	1.64624	0.36194	23	2	Sp3,Eomes	blastocyst formation	0.761067
GO:0001936	1.64624	0.36194	23	2	Cav2,Htr2b	regulation of endothelial cell proliferation	0.761067
GO:0005977	1.64624	0.36194	23	2	Gnmt,Pygm	glycogen metabolic process	0.761067
GO:0006661	1.64624	0.36194	23	2	Htr2b,Pik3r2	phosphatidylinositol biosynthetic process	0.761067
GO:0006801	1.64624	0.36194	23	2	Fbln5,Nox4	superoxide metabolic process	0.761067
GO:0007229	1.64624	0.36194	23	2	Pram1,Vav3	integrin-mediated signaling pathway	0.761067
GO:0007601	1.64624	0.36194	23	2	Glra1,Lamb2	visual perception	0.761067
GO:0021955	1.64624	0.36194	23	2	Ephb1,Tctn1	central nervous system neuron axonogenesis	0.761067
GO:0031663	1.64624	0.36194	23	2	Nos3,Myd88	lipopolysaccharide-mediated signaling pathway	0.761067
GO:0045814	1.64624	0.36194	23	2	Ube2b,Kmt2d	negative regulation of gene expression, epigenetic	0.761067
GO:0048538	1.64624	0.36194	23	2	Gata3,Six1	thymus development	0.761067
GO:0050921	1.64624	0.36194	23	2	Il16,Ccl5	positive regulation of chemotaxis	0.761067
GO:0070534	1.64624	0.36194	23	2	Ube2b,Itch	protein K63-linked ubiquitination	0.761067
GO:0006790	1.38018	0.363798	95	7	Gnmt,Acot2,Oplah,Mamdc2,Chst4,Aldh5a1,Spock2	sulfur compound metabolic process	0.761067
GO:0006887	1.38018	0.363798	95	7	Glra1,Plcd4,Vamp3,Stx4a,Pram1,Lgi3,Exph5	exocytosis	0.761067
GO:0042692	1.32888	0.367921	155	11	Cav2,Homer1,Prox1,Pitx1,Cdh2,Megf10,Neb,Cdon,Neurl2,Six1,Ppapdc3	muscle cell differentiation	0.761067
GO:0051346	1.36442	0.368535	96	7	Xiap,Ifi202b,Nos3,Amot,Serpinb6b,Sh3rf2,Slc7a14	negative regulation of hydrolase activity	0.761067
GO:0050878	1.349	0.373482	97	7	Vwf,Lyst,Vdr,Clcnka,Wnk4,P2ry12,F2r	regulation of body fluid levels	0.761067
GO:0042471	1.57678	0.381543	60	5	Gata2,Gata3,Cep290,Pax8,Six1	ear morphogenesis	0.761067
GO:0001836	1.57113	0.381981	24	2	Apopt1,Bmf	release of cytochrome c from mitochondria	0.761067
GO:0003158	1.57113	0.381981	24	2	Prox1,Acvr2b	endothelium development	0.761067
GO:0006112	1.57113	0.381981	24	2	Gnmt,Pygm	energy reserve metabolic process	0.761067
GO:0006749	1.57113	0.381981	24	2	Oplah,Aldh5a1	glutathione metabolic process	0.761067
GO:0014066	1.57113	0.381981	24	2	Ccl5,F2r	regulation of phosphatidylinositol 3-kinase cascade	0.761067
GO:0015807	1.57113	0.381981	24	2	Slc1a3,Ctns	L-amino acid transport	0.761067
GO:0035137	1.57113	0.381981	24	2	Pitx1,Zbtb16	hindlimb morphogenesis	0.761067
GO:0048286	1.57113	0.381981	24	2	Errfi1,Foxp2	lung alveolus development	0.761067
GO:0050953	1.57113	0.381981	24	2	Glra1,Lamb2	sensory perception of light stimulus	0.761067
GO:0055010	1.57113	0.381981	24	2	Prox1,Foxh1	ventricular cardiac muscle tissue morphogenesis	0.761067
GO:0070936	1.57113	0.381981	24	2	Ube2b,Itch	protein K48-linked ubiquitination	0.761067
GO:0009952	1.41839	0.382873	106	8	Wnt2,Frs2,Foxh1,Cdon,Hoxb4,Acvr2b,Zbtb16,Hoxc4	anterior/posterior pattern specification	0.761067
GO:0016331	1.41839	0.382873	106	8	Bmp7,Wnt2,Fuz,Gata3,Pax8,Bcl10,Tctn1,Six1	morphogenesis of embryonic epithelium	0.761067
GO:0030323	1.4038	0.385154	107	8	Wnt2,Slc23a1,Sp3,Errfi1,Nos3,Foxp2,Nkx2-9,Acvr2b	respiratory tube development	0.761067
GO:0061351	1.54834	0.385365	61	5	Prox1,Gata2,Frs2,Ephb1,Cdon	neural precursor cell proliferation	0.761067
GO:0051606	1.52089	0.389564	62	5	Ly96,Rs1,Ephb1,Tulp1,Dand5	detection of stimulus	0.761067
GO:0007498	1.49439	0.394121	63	5	Bmp7,Eomes,Foxh1,Dand5,Acvr2b	mesoderm development	0.761067
GO:0009855	1.49439	0.394121	63	5	Foxh1,Ofd1,Rfx3,Dand5,Acvr2b	determination of bilateral symmetry	0.761067
GO:0015833	1.46879	0.399017	64	5	Cacna1e,Pax8,Sirt4,Rfx3,Acvr2b	peptide transport	0.761067
GO:0030098	1.27227	0.399658	176	12	Gata3,Hs1bp3,Gadd45g,Bcl6,Cd4,Sp3,Il15,Fut7,Vnn1,Flt3,Txk,H2-Ab1	lymphocyte differentiation	0.761067
GO:0014031	1.44404	0.404233	65	5	Loxl3,Wnt2,Htr2b,Eomes,Nfatc1	mesenchymal cell development	0.761067
GO:0002443	1.29688	0.411271	115	8	Lyst,Bcl6,Bcl10,Klrb1c,Myd88,Pram1,H2-Ab1,Sh2d1b2	leukocyte mediated immunity	0.761067
GO:0051050	1.26338	0.417843	192	13	Homer1,Gata2,Htr2b,Pink1,Trpc6,Crebl2,Exph5,P2ry12,Tulp1,Camk4,F2r,Agtr1a,Cd47	positive regulation of transport	0.761067
GO:0008015	1.35992	0.420156	124	9	Cacna1e,Plcb3,Htr2b,Casq2,Nos3,Adrb1,Ndst2,F2r,Agtr1a	blood circulation	0.761067
GO:0017015	1.73125	0.424782	33	3	Cav2,Rnf111,Dand5	regulation of transforming growth factor beta receptor signaling pathway	0.761067
GO:0045666	1.73125	0.424782	33	3	Bmp7,Prox1,Cdon	positive regulation of neuron differentiation	0.761067
GO:0045834	1.73125	0.424782	33	3	Pnpla2,Crebl2,Vav3	positive regulation of lipid metabolic process	0.761067
GO:0050707	1.73125	0.424782	33	3	Htr2b,F2r,Agtr1a	regulation of cytokine secretion	0.761067
GO:0050764	1.73125	0.424782	33	3	Gata2,Tulp1,Cd47	regulation of phagocytosis	0.761067
GO:0055008	1.73125	0.424782	33	3	Prox1,Wnt2,Foxh1	cardiac muscle tissue morphogenesis	0.761067
GO:0060415	1.73125	0.424782	33	3	Prox1,Wnt2,Foxh1	muscle tissue morphogenesis	0.761067
GO:0060675	1.73125	0.424782	33	3	Gata3,Pax8,Six1	ureteric bud morphogenesis	0.761067
GO:0050730	1.35278	0.427938	69	5	Cd4,Errfi1,Ccl5,Rap2c,Sh2d1b2	regulation of peptidyl-tyrosine phosphorylation	0.761067
GO:0072073	1.35278	0.427938	69	5	Bmp7,Gata3,Pax8,Six1,Lamb2	kidney epithelium development	0.761067
GO:0000132	1.91867	0.431185	10	1	Dynlt1c	establishment of mitotic spindle orientation	0.761067
GO:0000768	1.91867	0.431185	10	1	Cdon	syncytium formation by plasma membrane fusion	0.761067
GO:0003300	1.91867	0.431185	10	1	Htr2b	cardiac muscle hypertrophy	0.761067
GO:0006111	1.91867	0.431185	10	1	Gnmt	regulation of gluconeogenesis	0.761067
GO:0006739	1.91867	0.431185	10	1	Shpk	NADP metabolic process	0.761067
GO:0006910	1.91867	0.431185	10	1	Megf10	phagocytosis, recognition	0.761067
GO:0007176	1.91867	0.431185	10	1	Errfi1	regulation of epidermal growth factor-activated receptor activity	0.761067
GO:0010812	1.91867	0.431185	10	1	Bcl6	negative regulation of cell-substrate adhesion	0.761067
GO:0016572	1.91867	0.431185	10	1	Ube2b	histone phosphorylation	0.761067
GO:0019229	1.91867	0.431185	10	1	F2r	regulation of vasoconstriction	0.761067
GO:0031649	1.91867	0.431185	10	1	Adrb1	heat generation	0.761067
GO:0032873	1.91867	0.431185	10	1	Itch	negative regulation of stress-activated MAPK cascade	0.761067
GO:0033198	1.91867	0.431185	10	1	P2rx3	response to ATP	0.761067
GO:0034381	1.91867	0.431185	10	1	Mylip	plasma lipoprotein particle clearance	0.761067
GO:0040037	1.91867	0.431185	10	1	Gata3	negative regulation of fibroblast growth factor receptor signaling pathway	0.761067
GO:0042104	1.91867	0.431185	10	1	Icosl	positive regulation of activated T cell proliferation	0.761067
GO:0042832	1.91867	0.431185	10	1	Lyst	defense response to protozoan	0.761067
GO:0043001	1.91867	0.431185	10	1	Vamp3	Golgi to plasma membrane protein transport	0.761067
GO:0043030	1.91867	0.431185	10	1	Shpk	regulation of macrophage activation	0.761067
GO:0048485	1.91867	0.431185	10	1	Gata3	sympathetic nervous system development	0.761067
GO:0048486	1.91867	0.431185	10	1	Six1	parasympathetic nervous system development	0.761067
GO:0048661	1.91867	0.431185	10	1	Ccl5	positive regulation of smooth muscle cell proliferation	0.761067
GO:0050805	1.91867	0.431185	10	1	Tnr	negative regulation of synaptic transmission	0.761067
GO:0050884	1.91867	0.431185	10	1	Glra1	neuromuscular process controlling posture	0.761067
GO:0055117	1.91867	0.431185	10	1	Casq2	regulation of cardiac muscle contraction	0.761067
GO:0060045	1.91867	0.431185	10	1	Wnt2	positive regulation of cardiac muscle cell proliferation	0.761067
GO:0060389	1.91867	0.431185	10	1	Bmp7	pathway-restricted SMAD protein phosphorylation	0.761067
GO:0060972	1.91867	0.431185	10	1	Pkd1l1	left/right pattern formation	0.761067
GO:0061298	1.91867	0.431185	10	1	Acvr2b	retina vasculature development in camera-type eye	0.761067
GO:0070509	1.91867	0.431185	10	1	Homer1	calcium ion import	0.761067
GO:2000178	1.91867	0.431185	10	1	Gata2	negative regulation of neural precursor cell proliferation	0.761067
GO:2000272	1.91867	0.431185	10	1	Errfi1	negative regulation of receptor activity	0.761067
GO:2000401	1.91867	0.431185	10	1	Ccl5	regulation of lymphocyte migration	0.761067
GO:0007162	1.6751	0.431435	34	3	B4galnt2,Tnr,Bcl6	negative regulation of cell adhesion	0.761067
GO:0008306	1.6751	0.431435	34	3	Cacna1e,Ctns,Tnr	associative learning	0.761067
GO:0051153	1.6751	0.431435	34	3	Prox1,Cdon,Ppapdc3	regulation of striated muscle cell differentiation	0.761067
GO:0001892	1.33173	0.434487	70	5	Wnt2,Gata2,Sp3,Eomes,Nrk	embryonic placenta development	0.761067
GO:0001894	1.33173	0.434487	70	5	Homer1,Gata2,Nox4,Tulp1,F2r	tissue homeostasis	0.761067
GO:0007266	1.62246	0.438624	35	3	Bcl6,Cdc42ep4,F2r	Rho protein signal transduction	0.761067
GO:0009880	1.62246	0.438624	35	3	Bmp7,Frs2,Zbtb16	embryonic pattern specification	0.761067
GO:0021675	1.62246	0.438624	35	3	Slc1a3,Ephb1,Six1	nerve development	0.761067
GO:0050796	1.62246	0.438624	35	3	Cacna1e,Sirt4,Rfx3	regulation of insulin secretion	0.761067
GO:0050852	1.62246	0.438624	35	3	Gata3,Bcl10,Txk	T cell receptor signaling pathway	0.761067
GO:0016337	1.26954	0.439811	132	9	B4galnt2,Tnr,Megf10,Ccl5,Chst4,Vnn1,Cdon,S100a9,Cdh3	cell-cell adhesion	0.761067
GO:0003208	1.573	0.446298	36	3	Prox1,Gata3,Foxh1	cardiac ventricle morphogenesis	0.761067
GO:0006333	1.573	0.446298	36	3	Hist1h4j,Hist1h4n,Hist1h4m	chromatin assembly or disassembly	0.761067
GO:0009749	1.573	0.446298	36	3	Cacna1e,Nox4,Acvr2b	response to glucose stimulus	0.761067
GO:0019722	1.573	0.446298	36	3	Cd4,Htr2b,Casq2	calcium-mediated signaling	0.761067
GO:0021510	1.573	0.446298	36	3	Gata2,Rfx4,Tctn1	spinal cord development	0.761067
GO:0048644	1.573	0.446298	36	3	Prox1,Wnt2,Foxh1	muscle organ morphogenesis	0.761067
GO:0019827	1.42545	0.447805	79	6	Bmp7,Prox1,Gata2,Pax8,Eomes,Zhx2	stem cell maintenance	0.761067
GO:0009308	1.52646	0.454406	37	3	Tph2,Pax8,Ido2	amine metabolic process	0.761067
GO:0010951	1.52646	0.454406	37	3	Xiap,Ifi202b,Serpinb6b	negative regulation of endopeptidase activity	0.761067
GO:0048747	1.52646	0.454406	37	3	Cav2,Homer1,Cdon	muscle fiber development	0.761067
GO:0055082	1.27683	0.458095	146	10	Cacna1e,Stc2,Vdr,Htr2b,Casq2,Nox4,Trpc6,Wnk4,F2r,Tpcn2	cellular chemical homeostasis	0.761067
GO:0034097	1.26727	0.460207	147	10	Shpk,Gata3,Mx2,Ifi202b,Adar,Ccl5,Pyhin1,Ifit2,Ifnlr1,H2-Ab1	response to cytokine stimulus	0.761067
GO:0001711	1.72649	0.46242	11	1	Eomes	endodermal cell fate commitment	0.761067
GO:0003407	1.72649	0.46242	11	1	Rs1	neural retina development	0.761067
GO:0006949	1.72649	0.46242	11	1	Cdon	syncytium formation	0.761067
GO:0007031	1.72649	0.46242	11	1	Pex11a	peroxisome organization	0.761067
GO:0009595	1.72649	0.46242	11	1	Ly96	detection of biotic stimulus	0.761067
GO:0009950	1.72649	0.46242	11	1	Wnt2	dorsal/ventral axis specification	0.761067
GO:0010828	1.72649	0.46242	11	1	Crebl2	positive regulation of glucose transport	0.761067
GO:0019430	1.72649	0.46242	11	1	Fbln5	removal of superoxide radicals	0.761067
GO:0031290	1.72649	0.46242	11	1	Ephb1	retinal ganglion cell axon guidance	0.761067
GO:0031503	1.72649	0.46242	11	1	Ralgapb	protein complex localization	0.761067
GO:0032414	1.72649	0.46242	11	1	Trpc6	positive regulation of ion transmembrane transporter activity	0.761067
GO:0032689	1.72649	0.46242	11	1	Gata3	negative regulation of interferon-gamma production	0.761067
GO:0034394	1.72649	0.46242	11	1	Fbln5	protein localization to cell surface	0.761067
GO:0035065	1.72649	0.46242	11	1	Gata2	regulation of histone acetylation	0.761067
GO:0040001	1.72649	0.46242	11	1	Dynlt1c	establishment of mitotic spindle localization	0.761067
GO:0042554	1.72649	0.46242	11	1	Nox4	superoxide anion generation	0.761067
GO:0045910	1.72649	0.46242	11	1	Bcl6	negative regulation of DNA recombination	0.761067
GO:0046676	1.72649	0.46242	11	1	Sirt4	negative regulation of insulin secretion	0.761067
GO:0050994	1.72649	0.46242	11	1	Pnpla2	regulation of lipid catabolic process	0.761067
GO:0051492	1.72649	0.46242	11	1	Kank4	regulation of stress fiber assembly	0.761067
GO:0051569	1.72649	0.46242	11	1	Gata3	regulation of histone H3-K4 methylation	0.761067
GO:0051966	1.72649	0.46242	11	1	Tnr	regulation of synaptic transmission, glutamatergic	0.761067
GO:0060602	1.72649	0.46242	11	1	Six1	branch elongation of an epithelium	0.761067
GO:0060712	1.72649	0.46242	11	1	Nrk	spongiotrophoblast layer development	0.761067
GO:0070076	1.72649	0.46242	11	1	Ube2b	histone lysine demethylation	0.761067
GO:0070193	1.72649	0.46242	11	1	Ube2b	synaptonemal complex organization	0.761067
GO:0090207	1.72649	0.46242	11	1	Pnpla2	regulation of triglyceride metabolic process	0.761067
GO:0002088	1.48257	0.4629	38	3	Prox1,Gata3,Cdon	lens development in camera-type eye	0.761067
GO:0008037	1.48257	0.4629	38	3	Celsr3,Megf10,Zp3r	cell recognition	0.761067
GO:0034968	1.48257	0.4629	38	3	Gata3,Kmt2d,Prdm9	histone lysine methylation	0.761067
GO:0042475	1.48257	0.4629	38	3	Bmp7,Fam20a,Acvr2b	odontogenesis of dentin-containing tooth	0.761067
GO:0051259	1.33283	0.464826	84	6	Cav2,Vwf,Gnmt,Bcl10,Ccl5,Bmf	protein oligomerization	0.761067
GO:0048589	1.2394	0.467484	150	10	Prox1,Wnt2,Gata3,Tnr,Gpr149,Kmt2d,Six1,Nrk,Lamb2,Ubtfl1	developmental growth	0.761067
GO:0007369	1.31571	0.468992	85	6	Bmp7,Frs2,Eomes,Foxh1,Amot,Acvr2b	gastrulation	0.761067
GO:0030162	1.23037	0.470209	151	10	Aifm3,Xiap,Ifi202b,Bcl10,Casp9,Apopt1,Serpinb6b,F2r,S100a9,Acrbp	regulation of proteolysis	0.761067
GO:0031056	1.44113	0.471736	39	3	Gata2,Gata3,Ube2b	regulation of histone modification	0.761067
GO:0050801	1.27426	0.479016	161	11	Hfe,Lyst,Stc2,Vdr,Htr2b,Casq2,Pqlc2,Trpc6,Wnk4,F2r,Tpcn2	ion homeostasis	0.761067
GO:0010466	1.40193	0.480872	40	3	Xiap,Ifi202b,Serpinb6b	negative regulation of peptidase activity	0.761067
GO:0048588	1.40193	0.480872	40	3	Tnr,Kmt2d,Lamb2	developmental cell growth	0.761067
GO:0050731	1.36479	0.490268	41	3	Cd4,Ccl5,Sh2d1b2	positive regulation of peptidyl-tyrosine phosphorylation	0.761067
GO:0000303	1.56927	0.491945	12	1	Fbln5	response to superoxide	0.761067
GO:0001881	1.56927	0.491945	12	1	Vamp3	receptor recycling	0.761067
GO:0001893	1.56927	0.491945	12	1	Stox2	maternal placenta development	0.761067
GO:0002467	1.56927	0.491945	12	1	Bcl6	germinal center formation	0.761067
GO:0006309	1.56927	0.491945	12	1	Dnase1l3	apoptotic DNA fragmentation	0.761067
GO:0006349	1.56927	0.491945	12	1	Kcnq1	regulation of gene expression by genetic imprinting	0.761067
GO:0007029	1.56927	0.491945	12	1	Cav2	endoplasmic reticulum organization	0.761067
GO:0009988	1.56927	0.491945	12	1	Zp3r	cell-cell recognition	0.761067
GO:0014044	1.56927	0.491945	12	1	Lamb2	Schwann cell development	0.761067
GO:0015813	1.56927	0.491945	12	1	Slc1a3	L-glutamate transport	0.761067
GO:0021904	1.56927	0.491945	12	1	Tctn1	dorsal/ventral neural tube patterning	0.761067
GO:0022409	1.56927	0.491945	12	1	Ccl5	positive regulation of cell-cell adhesion	0.761067
GO:0030225	1.56927	0.491945	12	1	Gata2	macrophage differentiation	0.761067
GO:0032924	1.56927	0.491945	12	1	Dand5	activin receptor signaling pathway	0.761067
GO:0035987	1.56927	0.491945	12	1	Eomes	endodermal cell differentiation	0.761067
GO:0042147	1.56927	0.491945	12	1	Vamp3	retrograde transport, endosome to Golgi	0.761067
GO:0042474	1.56927	0.491945	12	1	Six1	middle ear morphogenesis	0.761067
GO:0045063	1.56927	0.491945	12	1	Gadd45g	T-helper 1 cell differentiation	0.761067
GO:0045123	1.56927	0.491945	12	1	Chst4	cellular extravasation	0.761067
GO:0045494	1.56927	0.491945	12	1	Tulp1	photoreceptor cell maintenance	0.761067
GO:0045648	1.56927	0.491945	12	1	Gata2	positive regulation of erythrocyte differentiation	0.761067
GO:0045661	1.56927	0.491945	12	1	Cdon	regulation of myoblast differentiation	0.761067
GO:0045686	1.56927	0.491945	12	1	Lingo1	negative regulation of glial cell differentiation	0.761067
GO:0046825	1.56927	0.491945	12	1	Camk4	regulation of protein export from nucleus	0.761067
GO:0046889	1.56927	0.491945	12	1	Crebl2	positive regulation of lipid biosynthetic process	0.761067
GO:0048821	1.56927	0.491945	12	1	Bcl6	erythrocyte development	0.761067
GO:0050850	1.56927	0.491945	12	1	Cd4	positive regulation of calcium-mediated signaling	0.761067
GO:0051180	1.56927	0.491945	12	1	Slc23a1	vitamin transport	0.761067
GO:0051294	1.56927	0.491945	12	1	Dynlt1c	establishment of spindle orientation	0.761067
GO:0051384	1.56927	0.491945	12	1	Casp9	response to glucocorticoid stimulus	0.761067
GO:0051898	1.56927	0.491945	12	1	Ypel1	negative regulation of protein kinase B signaling cascade	0.761067
GO:0060291	1.56927	0.491945	12	1	Tnr	long-term synaptic potentiation	0.761067
GO:0071277	1.56927	0.491945	12	1	Htr2b	cellular response to calcium ion	0.761067
GO:0071622	1.56927	0.491945	12	1	Ccl5	regulation of granulocyte chemotaxis	0.761067
GO:0071805	1.56927	0.491945	12	1	Casq2	potassium ion transmembrane transport	0.761067
GO:0072132	1.56927	0.491945	12	1	Bmp7	mesenchyme morphogenesis	0.761067
GO:0090162	1.56927	0.491945	12	1	Syne4	establishment of epithelial cell polarity	0.761067
GO:2000134	1.56927	0.491945	12	1	Slfn1	negative regulation of G1/S transition of mitotic cell cycle	0.761067
GO:2001257	1.56927	0.491945	12	1	Homer1	regulation of cation channel activity	0.761067
GO:0006935	1.20005	0.49613	170	11	Il16,Bmp7,Gata3,Lyst,Matn2,Csf3r,Ephb1,Ccl5,Amot,Lamb2,S100a9	chemotaxis	0.761067
GO:0001890	1.31919	0.498671	99	7	Vwf,Wnt2,Gata2,Sp3,Eomes,Stox2,Nrk	placenta development	0.761067
GO:0009416	1.31919	0.498671	99	7	Cacna1e,Slc1a3,Ctns,Casp9,D7Ertd443e,Rs1,Tulp1	response to light stimulus	0.761067
GO:0048871	1.31919	0.498671	99	7	Hfe,Homer1,Gata2,Nox4,Adrb1,Tulp1,F2r	multicellular organismal homeostasis	0.761067
GO:0001889	1.32956	0.499885	42	3	Vwf,Prox1,Sp3	liver development	0.761067
GO:0034765	1.32956	0.499885	42	3	Homer1,Casq2,Trpc6	regulation of ion transmembrane transport	0.761067
GO:0045807	1.32956	0.499885	42	3	Gata2,Tulp1,Cd47	positive regulation of endocytosis	0.761067
GO:0048813	1.32956	0.499885	42	3	Ephb1,Dcdc2a,Kndc1	dendrite morphogenesis	0.761067
GO:0050868	1.29608	0.50969	43	3	Bcl6,Itch,Slfn1	negative regulation of T cell activation	0.761067
GO:0072659	1.29608	0.50969	43	3	Vamp3,Gpr158,Gpr179	protein localization to plasma membrane	0.761067
GO:0000305	1.43826	0.519853	13	1	Fbln5	response to oxygen radical	0.761067
GO:0001523	1.43826	0.519853	13	1	Rdh12	retinoid metabolic process	0.761067
GO:0001562	1.43826	0.519853	13	1	Lyst	response to protozoan	0.761067
GO:0003179	1.43826	0.519853	13	1	Gata3	heart valve morphogenesis	0.761067
GO:0006024	1.43826	0.519853	13	1	Ndst2	glycosaminoglycan biosynthetic process	0.761067
GO:0006505	1.43826	0.519853	13	1	Pgap3	GPI anchor metabolic process	0.761067
GO:0006584	1.43826	0.519853	13	1	Gata3	catecholamine metabolic process	0.761067
GO:0006826	1.43826	0.519853	13	1	Steap3	iron ion transport	0.761067
GO:0006893	1.43826	0.519853	13	1	Vamp3	Golgi to plasma membrane transport	0.761067
GO:0006942	1.43826	0.519853	13	1	Casq2	regulation of striated muscle contraction	0.761067
GO:0009311	1.43826	0.519853	13	1	St6gal2	oligosaccharide metabolic process	0.761067
GO:0009712	1.43826	0.519853	13	1	Gata3	catechol-containing compound metabolic process	0.761067
GO:0016577	1.43826	0.519853	13	1	Ube2b	histone demethylation	0.761067
GO:0032411	1.43826	0.519853	13	1	Trpc6	positive regulation of transporter activity	0.761067
GO:0033059	1.43826	0.519853	13	1	Lyst	cellular pigmentation	0.761067
GO:0033628	1.43826	0.519853	13	1	Ccl5	regulation of cell adhesion mediated by integrin	0.761067
GO:0042446	1.43826	0.519853	13	1	Hfe	hormone biosynthetic process	0.761067
GO:0042531	1.43826	0.519853	13	1	Ccl5	positive regulation of tyrosine phosphorylation of STAT protein	0.761067
GO:0043552	1.43826	0.519853	13	1	Vav3	positive regulation of phosphatidylinositol 3-kinase activity	0.761067
GO:0043576	1.43826	0.519853	13	1	Glra1	regulation of respiratory gaseous exchange	0.761067
GO:0045581	1.43826	0.519853	13	1	Bcl6	negative regulation of T cell differentiation	0.761067
GO:0045839	1.43826	0.519853	13	1	Bmp7	negative regulation of mitosis	0.761067
GO:0048713	1.43826	0.519853	13	1	Lingo1	regulation of oligodendrocyte differentiation	0.761067
GO:0050881	1.43826	0.519853	13	1	Homer1	musculoskeletal movement	0.761067
GO:0051489	1.43826	0.519853	13	1	Myo3b	regulation of filopodium assembly	0.761067
GO:0055012	1.43826	0.519853	13	1	Prox1	ventricular cardiac muscle cell differentiation	0.761067
GO:0070306	1.43826	0.519853	13	1	Prox1	lens fiber cell differentiation	0.761067
GO:0070373	1.43826	0.519853	13	1	Ndrg2	negative regulation of ERK1 and ERK2 cascade	0.761067
GO:0071346	1.43826	0.519853	13	1	H2-Ab1	cellular response to interferon-gamma	0.761067
GO:0072676	1.43826	0.519853	13	1	Ccl5	lymphocyte migration	0.761067
GO:0090103	1.43826	0.519853	13	1	Six1	cochlea morphogenesis	0.761067
GO:0090398	1.43826	0.519853	13	1	Nuak1	cellular senescence	0.761067
GO:0018108	1.21181	0.524524	107	7	Cd4,Abi2,Errfi1,Ccl5,F2r,Rap2c,Sh2d1b2	peptidyl-tyrosine phosphorylation	0.761067
GO:0007596	1.44258	0.530767	52	4	Vwf,Lyst,P2ry12,F2r	blood coagulation	0.761067
GO:0010921	1.44258	0.530767	52	4	Nuak1,Ppp6r2,Sh3rf2,Slc7a14	regulation of phosphatase activity	0.761067
GO:0050768	1.44258	0.530767	52	4	Dynlt1c,Bmp7,Tnr,Lingo1	negative regulation of neurogenesis	0.761067
GO:0007599	1.41288	0.53459	53	4	Vwf,Lyst,P2ry12,F2r	hemostasis	0.761067
GO:0022037	1.38437	0.538763	54	4	Prox1,Rfx4,Foxp2,Kndc1	metencephalon development	0.761067
GO:0042445	1.38437	0.538763	54	4	Hfe,Rdh12,Pax8,Tg	hormone metabolic process	0.761067
GO:0006873	1.2378	0.540316	120	8	Stc2,Vdr,Htr2b,Casq2,Trpc6,Wnk4,F2r,Tpcn2	cellular ion homeostasis	0.761067
GO:0060541	1.2378	0.540316	120	8	Wnt2,Slc23a1,Sp3,Errfi1,Nos3,Foxp2,Nkx2-9,Acvr2b	respiratory system development	0.761067
GO:0032943	1.22662	0.542799	121	8	Icosl,Bcl6,Itch,Cd38,Il15,Myd88,Itgad,Slfn1	mononuclear cell proliferation	0.761067
GO:0046651	1.22662	0.542799	121	8	Icosl,Bcl6,Itch,Cd38,Il15,Myd88,Itgad,Slfn1	lymphocyte proliferation	0.761067
GO:0001657	1.35697	0.543266	55	4	Bmp7,Gata3,Pax8,Six1	ureteric bud development	0.761067
GO:0042552	1.35697	0.543266	55	4	Serinc5,Ypel1,Wasf3,Tg	myelination	0.761067
GO:0072164	1.35697	0.543266	55	4	Bmp7,Gata3,Pax8,Six1	mesonephric tubule development	0.761067
GO:0001662	1.32741	0.546233	14	1	Cacna1e	behavioral fear response	0.761067
GO:0001964	1.32741	0.546233	14	1	Glra1	startle response	0.761067
GO:0002690	1.32741	0.546233	14	1	Ccl5	positive regulation of leukocyte chemotaxis	0.761067
GO:0002902	1.32741	0.546233	14	1	Bcl10	regulation of B cell apoptotic process	0.761067
GO:0003170	1.32741	0.546233	14	1	Gata3	heart valve development	0.761067
GO:0006482	1.32741	0.546233	14	1	Ube2b	protein demethylation	0.761067
GO:0006687	1.32741	0.546233	14	1	Aldh5a1	glycosphingolipid metabolic process	0.761067
GO:0006829	1.32741	0.546233	14	1	Slc39a3	zinc ion transport	0.761067
GO:0019886	1.32741	0.546233	14	1	H2-Ab1	antigen processing and presentation of exogenous peptide antigen via MHC class II	0.761067
GO:0030224	1.32741	0.546233	14	1	Sp3	monocyte differentiation	0.761067
GO:0030851	1.32741	0.546233	14	1	Sp3	granulocyte differentiation	0.761067
GO:0042058	1.32741	0.546233	14	1	Errfi1	regulation of epidermal growth factor receptor signaling pathway	0.761067
GO:0046888	1.32741	0.546233	14	1	Sirt4	negative regulation of hormone secretion	0.761067
GO:0048103	1.32741	0.546233	14	1	Hoxb4	somatic stem cell division	0.761067
GO:0048535	1.32741	0.546233	14	1	Il15	lymph node development	0.761067
GO:0050701	1.32741	0.546233	14	1	S100a13	interleukin-1 secretion	0.761067
GO:0050709	1.32741	0.546233	14	1	F2r	negative regulation of protein secretion	0.761067
GO:0050810	1.32741	0.546233	14	1	Vdr	regulation of steroid biosynthetic process	0.761067
GO:0060043	1.32741	0.546233	14	1	Wnt2	regulation of cardiac muscle cell proliferation	0.761067
GO:0060706	1.32741	0.546233	14	1	Eomes	cell differentiation involved in embryonic placenta development	0.761067
GO:0061384	1.32741	0.546233	14	1	Foxh1	heart trabecula morphogenesis	0.761067
GO:0070232	1.32741	0.546233	14	1	Ccl5	regulation of T cell apoptotic process	0.761067
GO:0051260	1.33064	0.548074	56	4	Vwf,Gnmt,Bcl10,Bmf	protein homooligomerization	0.761067
GO:0010256	1.20483	0.54825	123	8	Cav2,Rab5b,Lyst,Vamp3,Als2cl,Gpr158,S100a9,Gpr179	endomembrane system organization	0.761067
GO:0006909	1.30529	0.553166	57	4	Gata2,Megf10,Tulp1,Cd47	phagocytosis	0.761067
GO:0008366	1.30529	0.553166	57	4	Serinc5,Ypel1,Wasf3,Tg	axon ensheathment	0.761067
GO:0070661	1.18378	0.554311	125	8	Icosl,Bcl6,Itch,Cd38,Il15,Myd88,Itgad,Slfn1	leukocyte proliferation	0.761067
GO:0010721	1.28088	0.55852	58	4	Dynlt1c,Bmp7,Tnr,Lingo1	negative regulation of cell development	0.761067
GO:0045580	1.28088	0.55852	58	4	Gata3,Bcl6,Il15,Vnn1	regulation of T cell differentiation	0.761067
GO:0050905	1.28088	0.55852	58	4	Glra1,Slc1a3,Tnr,Pomk	neuromuscular process	0.761067
GO:0051302	1.25736	0.564115	59	4	Bmp7,Ube2b,Htr2b,Prdm9	regulation of cell division	0.761067
GO:0060047	1.25736	0.564115	59	4	Cacna1e,Casq2,Nos3,Adrb1	heart contraction	0.761067
GO:0007009	1.23468	0.569931	60	4	Vamp3,Gpr158,S100a9,Gpr179	plasma membrane organization	0.761067
GO:0035303	1.23468	0.569931	60	4	Nuak1,Ppp6r2,Sh3rf2,Slc7a14	regulation of dephosphorylation	0.761067
GO:0001895	1.23238	0.571168	15	1	Tulp1	retina homeostasis	0.761067
GO:0003016	1.23238	0.571168	15	1	Glra1	respiratory system process	0.761067
GO:0006094	1.23238	0.571168	15	1	Gnmt	gluconeogenesis	0.761067
GO:0008038	1.23238	0.571168	15	1	Celsr3	neuron recognition	0.761067
GO:0014003	1.23238	0.571168	15	1	Wasf3	oligodendrocyte development	0.761067
GO:0016601	1.23238	0.571168	15	1	Farp2	Rac protein signal transduction	0.761067
GO:0032651	1.23238	0.571168	15	1	F2r	regulation of interleukin-1 beta production	0.761067
GO:0032760	1.23238	0.571168	15	1	Myd88	positive regulation of tumor necrosis factor production	0.761067
GO:0032963	1.23238	0.571168	15	1	F2r	collagen metabolic process	0.761067
GO:0033081	1.23238	0.571168	15	1	Vnn1	regulation of T cell differentiation in thymus	0.761067
GO:0035088	1.23238	0.571168	15	1	Syne4	establishment or maintenance of apical/basal cell polarity	0.761067
GO:0035136	1.23238	0.571168	15	1	Zbtb16	forelimb morphogenesis	0.761067
GO:0043277	1.23238	0.571168	15	1	Megf10	apoptotic cell clearance	0.761067
GO:0043534	1.23238	0.571168	15	1	Amot	blood vessel endothelial cell migration	0.761067
GO:0044130	1.23238	0.571168	15	1	Myd88	negative regulation of growth of symbiont in host	0.761067
GO:0044146	1.23238	0.571168	15	1	Myd88	negative regulation of growth of symbiont involved in interaction with host	0.761067
GO:0045061	1.23238	0.571168	15	1	Gata3	thymic T cell selection	0.761067
GO:0046164	1.23238	0.571168	15	1	Cyp39a1	alcohol catabolic process	0.761067
GO:0050732	1.23238	0.571168	15	1	Errfi1	negative regulation of peptidyl-tyrosine phosphorylation	0.761067
GO:0051289	1.23238	0.571168	15	1	Gnmt	protein homotetramerization	0.761067
GO:0061178	1.23238	0.571168	15	1	Cacna1e	regulation of insulin secretion involved in cellular response to glucose stimulus	0.761067
GO:0030183	1.19166	0.582149	62	4	Bcl6,Sp3,Flt3,H2-Ab1	B cell differentiation	0.761067
GO:0051250	1.19166	0.582149	62	4	Bcl6,Itch,Flt3,Slfn1	negative regulation of lymphocyte activation	0.761067
GO:0009617	1.2127	0.586269	153	10	Shpk,Lyst,Cd4,Ly96,Bcl10,Nos3,Myd88,Defb1,F2r,Cd47	response to bacterium	0.761067
GO:0051648	1.31131	0.593515	71	5	Amph,Fyco1,Sh3gl2,Stx4a,Ap3m2	vesicle localization	0.761067
GO:0014706	1.17061	0.593933	158	10	Cav2,Homer1,Prox1,Wnt2,Pitx1,Megf10,Foxp2,Foxh1,Cdon,Six1	striated muscle tissue development	0.761067
GO:0002762	1.15002	0.594737	16	1	Gata2	negative regulation of myeloid leukocyte differentiation	0.761067
GO:0002828	1.15002	0.594737	16	1	Bcl6	regulation of type 2 immune response	0.761067
GO:0007156	1.15002	0.594737	16	1	Cdh2	homophilic cell adhesion	0.761067
GO:0007189	1.15002	0.594737	16	1	Adrb1	adenylate cyclase-activating G-protein coupled receptor signaling pathway	0.761067
GO:0009593	1.15002	0.594737	16	1	Ly96	detection of chemical stimulus	0.761067
GO:0010883	1.15002	0.594737	16	1	Pnpla2	regulation of lipid storage	0.761067
GO:0021522	1.15002	0.594737	16	1	Tctn1	spinal cord motor neuron differentiation	0.761067
GO:0021952	1.15002	0.594737	16	1	Ephb1	central nervous system projection neuron axonogenesis	0.761067
GO:0022904	1.15002	0.594737	16	1	Aldh5a1	respiratory electron transport chain	0.761067
GO:0030262	1.15002	0.594737	16	1	Dnase1l3	apoptotic nuclear changes	0.761067
GO:0030514	1.15002	0.594737	16	1	Dand5	negative regulation of BMP signaling pathway	0.761067
GO:0033032	1.15002	0.594737	16	1	Ccl5	regulation of myeloid cell apoptotic process	0.761067
GO:0034453	1.15002	0.594737	16	1	Bicd2	microtubule anchoring	0.761067
GO:0043149	1.15002	0.594737	16	1	Kank4	stress fiber assembly	0.761067
GO:0043550	1.15002	0.594737	16	1	Vav3	regulation of lipid kinase activity	0.761067
GO:0044259	1.15002	0.594737	16	1	F2r	multicellular organismal macromolecule metabolic process	0.761067
GO:0046579	1.15002	0.594737	16	1	F2r	positive regulation of Ras protein signal transduction	0.761067
GO:0048169	1.15002	0.594737	16	1	Syp	regulation of long-term neuronal synaptic plasticity	0.761067
GO:0048490	1.15002	0.594737	16	1	Ap3m2	anterograde synaptic vesicle transport	0.761067
GO:0050848	1.15002	0.594737	16	1	Cd4	regulation of calcium-mediated signaling	0.761067
GO:0051438	1.15002	0.594737	16	1	Zer1	regulation of ubiquitin-protein ligase activity	0.761067
GO:0051881	1.15002	0.594737	16	1	Aifm3	regulation of mitochondrial membrane potential	0.761067
GO:0060441	1.15002	0.594737	16	1	Wnt2	epithelial tube branching involved in lung morphogenesis	0.761067
GO:0060716	1.15002	0.594737	16	1	Wnt2	labyrinthine layer blood vessel development	0.761067
GO:0060997	1.15002	0.594737	16	1	Ephb1	dendritic spine morphogenesis	0.761067
GO:0097006	1.15002	0.594737	16	1	Mylip	regulation of plasma lipoprotein particle levels	0.761067
GO:2000108	1.15002	0.594737	16	1	Ccl5	positive regulation of leukocyte apoptotic process	0.761067
GO:0048863	1.14669	0.599999	161	10	Loxl3,Bmp7,Prox1,Wnt2,Gata2,Htr2b,Pax8,Eomes,Nfatc1,Zhx2	stem cell differentiation	0.761067
GO:0002064	1.25359	0.602267	74	5	Prox1,Pax8,Rfx3,Lamb2,Insm1	epithelial cell development	0.761067
GO:0015672	1.21782	0.609228	76	5	Slc23a1,Casq2,Nos3,Scnn1a,Slc12a3	monovalent inorganic cation transport	0.761067
GO:0045619	1.20068	0.61301	77	5	Gata3,Bcl6,Il15,Vnn1,Flt3	regulation of lymphocyte differentiation	0.761067
GO:0051047	1.20068	0.61301	77	5	Htr2b,Pink1,Exph5,F2r,Agtr1a	positive regulation of secretion	0.761067
GO:0000045	1.07793	0.617014	17	1	Map1lc3a	autophagic vacuole assembly	0.761067
GO:0000086	1.07793	0.617014	17	1	Tpd52l1	G2/M transition of mitotic cell cycle	0.761067
GO:0000096	1.07793	0.617014	17	1	Gnmt	sulfur amino acid metabolic process	0.761067
GO:0001659	1.07793	0.617014	17	1	Adrb1	temperature homeostasis	0.761067
GO:0001706	1.07793	0.617014	17	1	Eomes	endoderm formation	0.761067
GO:0001783	1.07793	0.617014	17	1	Bcl10	B cell apoptotic process	0.761067
GO:0002495	1.07793	0.617014	17	1	H2-Ab1	antigen processing and presentation of peptide antigen via MHC class II	0.761067
GO:0006090	1.07793	0.617014	17	1	Me3	pyruvate metabolic process	0.761067
GO:0014037	1.07793	0.617014	17	1	Lamb2	Schwann cell differentiation	0.761067
GO:0015844	1.07793	0.617014	17	1	Pink1	monoamine transport	0.761067
GO:0019319	1.07793	0.617014	17	1	Gnmt	hexose biosynthetic process	0.761067
GO:0021591	1.07793	0.617014	17	1	Ak8	ventricular system development	0.761067
GO:0021772	1.07793	0.617014	17	1	Eomes	olfactory bulb development	0.761067
GO:0033028	1.07793	0.617014	17	1	Ccl5	myeloid cell apoptotic process	0.761067
GO:0033138	1.07793	0.617014	17	1	Crebl2	positive regulation of peptidyl-serine phosphorylation	0.761067
GO:0042551	1.07793	0.617014	17	1	Farp2	neuron maturation	0.761067
GO:0044117	1.07793	0.617014	17	1	Myd88	growth of symbiont in host	0.761067
GO:0045778	1.07793	0.617014	17	1	Zbtb16	positive regulation of ossification	0.761067
GO:0045921	1.07793	0.617014	17	1	Exph5	positive regulation of exocytosis	0.761067
GO:0046677	1.07793	0.617014	17	1	Slc1a3	response to antibiotic	0.761067
GO:0048536	1.07793	0.617014	17	1	Hoxb4	spleen development	0.761067
GO:0048742	1.07793	0.617014	17	1	Cdon	regulation of skeletal muscle fiber development	0.761067
GO:0055024	1.07793	0.617014	17	1	Wnt2	regulation of cardiac muscle tissue development	0.761067
GO:0060612	1.07793	0.617014	17	1	Creb5	adipose tissue development	0.761067
GO:0001838	1.25136	0.634342	89	6	Fuz,Gata3,Pax8,Bcl10,Tctn1,Six1	embryonic epithelial tube formation	0.776813
GO:0006917	1.25136	0.634342	89	6	Gsdma,Aifm3,Bcl10,Casp9,Dapk2,S100a9	induction of apoptosis	0.776813
GO:0050678	1.25136	0.634342	89	6	Cav2,Wnt2,Frs2,Htr2b,Foxp2,Nkx2-9	regulation of epithelial cell proliferation	0.776813
GO:0072175	1.23623	0.636221	90	6	Fuz,Gata3,Pax8,Bcl10,Tctn1,Six1	epithelial tube formation	0.776813
GO:0008542	1.50255	0.645297	25	2	Cacna1e,Ctns	visual learning	0.776813
GO:0008589	1.50255	0.645297	25	2	Fuz,Tctn1	regulation of smoothened signaling pathway	0.776813
GO:0042130	1.50255	0.645297	25	2	Itch,Slfn1	negative regulation of T cell proliferation	0.776813
GO:0045445	1.50255	0.645297	25	2	Pitx1,Cdon	myoblast differentiation	0.776813
GO:0046425	1.50255	0.645297	25	2	Ccl5,F2r	regulation of JAK-STAT cascade	0.776813
GO:0048013	1.50255	0.645297	25	2	Efna2,Ephb1	ephrin receptor signaling pathway	0.776813
GO:0048663	1.50255	0.645297	25	2	Gata2,Olig1	neuron fate commitment	0.776813
GO:0071322	1.50255	0.645297	25	2	Cacna1e,Nox4	cellular response to carbohydrate stimulus	0.776813
GO:0035148	1.16568	0.648326	95	6	Fuz,Gata3,Pax8,Bcl10,Tctn1,Six1	tube formation	0.776813
GO:0001678	1.43969	0.651354	26	2	Cacna1e,Nox4	cellular glucose homeostasis	0.776813
GO:0001738	1.43969	0.651354	26	2	Fuz,Syne4	morphogenesis of a polarized epithelium	0.776813
GO:0003014	1.43969	0.651354	26	2	F2r,Agtr1a	renal system process	0.776813
GO:0003229	1.43969	0.651354	26	2	Prox1,Foxh1	ventricular cardiac muscle tissue development	0.776813
GO:0006694	1.43969	0.651354	26	2	Vdr,Cyp39a1	steroid biosynthetic process	0.776813
GO:0007613	1.43969	0.651354	26	2	Ctns,Adcy8	memory	0.776813
GO:0007632	1.43969	0.651354	26	2	Cacna1e,Ctns	visual behavior	0.776813
GO:0010830	1.43969	0.651354	26	2	Cdon,Ppapdc3	regulation of myotube differentiation	0.776813
GO:0045766	1.43969	0.651354	26	2	Gata2,Nos3	positive regulation of angiogenesis	0.776813
GO:0048520	1.43969	0.651354	26	2	Il16,Ccl5	positive regulation of behavior	0.776813
GO:0048839	1.13963	0.654291	97	6	Prox1,Gata2,Gata3,Cep290,Pax8,Six1	inner ear development	0.776813
GO:0001935	1.38186	0.657818	27	2	Cav2,Htr2b	endothelial cell proliferation	0.776813
GO:0002381	1.38186	0.657818	27	2	Bcl6,H2-Ab1	immunoglobulin production involved in immunoglobulin mediated immune response	0.776813
GO:0006813	1.38186	0.657818	27	2	Casq2,Nos3	potassium ion transport	0.776813
GO:0017148	1.38186	0.657818	27	2	Ybx2,Paip2	negative regulation of translation	0.776813
GO:0001658	1.32848	0.664626	28	2	Pax8,Six1	branching involved in ureteric bud morphogenesis	0.776813
GO:0006029	1.32848	0.664626	28	2	Mamdc2,Spock2	proteoglycan metabolic process	0.776813
GO:0006941	1.32848	0.664626	28	2	Homer1,Casq2	striated muscle contraction	0.776813
GO:0007606	1.32848	0.664626	28	2	P2rx3,Reep2	sensory perception of chemical stimulus	0.776813
GO:0010171	1.32848	0.664626	28	2	Fuz,Cdon	body morphogenesis	0.776813
GO:0016052	1.32848	0.664626	28	2	Shpk,Pygm	carbohydrate catabolic process	0.776813
GO:0030032	1.32848	0.664626	28	2	Wasf3,Vav3	lamellipodium assembly	0.776813
GO:0031532	1.32848	0.664626	28	2	Cdc42bpg,S100a9	actin cytoskeleton reorganization	0.776813
GO:0032835	1.32848	0.664626	28	2	Bmp7,Lamb2	glomerulus development	0.776813
GO:0048709	1.32848	0.664626	28	2	Wasf3,Lingo1	oligodendrocyte differentiation	0.776813
GO:0051262	1.32848	0.664626	28	2	Gnmt,Ccl5	protein tetramerization	0.776813
GO:0060425	1.32848	0.664626	28	2	Wnt2,Foxp2	lung morphogenesis	0.776813
GO:0070374	1.32848	0.664626	28	2	Nox4,F2r	positive regulation of ERK1 and ERK2 cascade	0.776813
GO:0006875	1.17585	0.669397	110	7	Stc2,Vdr,Htr2b,Casq2,Trpc6,F2r,Tpcn2	cellular metal ion homeostasis	0.777761
GO:0006576	1.27904	0.671721	29	2	Tph2,Ido2	cellular biogenic amine metabolic process	0.777761
GO:0007628	1.27904	0.671721	29	2	Glra1,Ctns	adult walking behavior	0.777761
GO:0009612	1.27904	0.671721	29	2	Slc1a3,Foxp2	response to mechanical stimulus	0.777761
GO:0021536	1.27904	0.671721	29	2	Gata2,Pitx1	diencephalon development	0.777761
GO:0030593	1.27904	0.671721	29	2	Csf3r,S100a9	neutrophil chemotaxis	0.777761
GO:0002683	1.15301	0.67322	112	7	Bcl6,Ifi202b,Itch,Trafd1,Flt3,Sh2d1b2,Slfn1	negative regulation of immune system process	0.777761
GO:0002250	1.14192	0.675334	113	7	Lyst,Gadd45g,Bcl6,Bcl10,Myd88,Txk,H2-Ab1	adaptive immune response	0.777761
GO:0050673	1.13103	0.677575	114	7	Cav2,Prox1,Wnt2,Frs2,Htr2b,Foxp2,Nkx2-9	epithelial cell proliferation	0.777761
GO:0008543	1.23314	0.679052	30	2	Gata3,Frs2	fibroblast growth factor receptor signaling pathway	0.777761
GO:0048675	1.23314	0.679052	30	2	Tnr,Lamb2	axon extension	0.777761
GO:0050773	1.23314	0.679052	30	2	D130043K22Rik,Kndc1	regulation of dendrite development	0.777761
GO:0050807	1.23314	0.679052	30	2	Ephb1,Six1	regulation of synapse organization	0.777761
GO:0050821	1.23314	0.679052	30	2	D7Ertd443e,Crebl2	protein stabilization	0.777761
GO:0061371	1.23314	0.679052	30	2	Foxh1,Dand5	determination of heart left/right asymmetry	0.777761
GO:0090090	1.23314	0.679052	30	2	Cdh2,Amer1	negative regulation of canonical Wnt receptor signaling pathway	0.777761
GO:0044344	1.1904	0.686571	31	2	Gata3,Frs2	cellular response to fibroblast growth factor stimulus	0.784407
GO:0050729	1.1904	0.686571	31	2	Cd47,S100a9	positive regulation of inflammatory response	0.784407
GO:0042326	1.15352	0.692134	128	8	Ndrg2,Bmp7,Ube2b,Gadd45g,Itch,Adar,Errfi1,Slfn1	negative regulation of phosphorylation	0.786284
GO:0003151	1.15051	0.694235	32	2	Foxh1,Six1	outflow tract morphogenesis	0.786284
GO:0007589	1.15051	0.694235	32	2	Vdr,Wnk4	body fluid secretion	0.786284
GO:0045665	1.15051	0.694235	32	2	Bmp7,Zhx2	negative regulation of neuron differentiation	0.786284
GO:0046849	1.15051	0.694235	32	2	Efna2,Nox4	bone remodeling	0.786284
GO:0050672	1.15051	0.694235	32	2	Itch,Slfn1	negative regulation of lymphocyte proliferation	0.786284
GO:0050803	1.15051	0.694235	32	2	Ephb1,Six1	regulation of synapse structure and activity	0.786284
GO:0042391	1.10631	0.700511	133	8	Glra1,Serinc5,Aifm3,Ypel1,Casq2,Wasf3,Kcnj2,Tg	regulation of membrane potential	0.787281
GO:0001708	1.11319	0.702006	33	2	Eomes,Cdon	cell fate specification	0.787281
GO:0002224	1.11319	0.702006	33	2	Cd86,Myd88	toll-like receptor signaling pathway	0.787281
GO:0007416	1.11319	0.702006	33	2	Ephb1,Six1	synapse assembly	0.787281
GO:0030888	1.11319	0.702006	33	2	Bcl6,Cd38	regulation of B cell proliferation	0.787281
GO:0032507	1.11319	0.702006	33	2	Cd4,Bicd2	maintenance of protein location in cell	0.787281
GO:0050920	1.11319	0.702006	33	2	Il16,Ccl5	regulation of chemotaxis	0.787281
GO:0070664	1.11319	0.702006	33	2	Itch,Slfn1	negative regulation of leukocyte proliferation	0.787281
GO:0007188	1.07818	0.70985	34	2	Adrb1,P2ry12	adenylate cyclase-modulating G-protein coupled receptor signaling pathway	0.791223
GO:0009187	1.07818	0.70985	34	2	Htr2b,Gucy1a2	cyclic nucleotide metabolic process	0.791223
GO:0030850	1.07818	0.70985	34	2	Bmp7,Frs2	prostate gland development	0.791223
GO:0046890	1.07818	0.70985	34	2	Vdr,Crebl2	regulation of lipid biosynthetic process	0.791223
GO:0050885	1.07818	0.70985	34	2	Slc1a3,Tnr	neuromuscular process controlling balance	0.791223
GO:0033674	1.11174	0.714458	149	9	Frs2,Gadd45g,Nox4,Card10,Vav3,F2r,Spdya,Nrk,Acvr2b	positive regulation of kinase activity	0.791326
GO:0006641	1.04536	0.717734	35	2	Pnpla2,Apobr	triglyceride metabolic process	0.791326
GO:0008637	1.04536	0.717734	35	2	Apopt1,Bmf	apoptotic mitochondrial changes	0.791326
GO:0016050	1.04536	0.717734	35	2	Lyst,Vav3	vesicle organization	0.791326
GO:0021782	1.04536	0.717734	35	2	Wasf3,Lamb2	glial cell development	0.791326
GO:0031398	1.04536	0.717734	35	2	Bcl10,Rnf111	positive regulation of protein ubiquitination	0.791326
GO:0045638	1.04536	0.717734	35	2	Gata2,Zbtb16	negative regulation of myeloid cell differentiation	0.791326
GO:0045787	1.04536	0.717734	35	2	Prox1,Spdya	positive regulation of cell cycle	0.791326
GO:0050871	1.04536	0.717734	35	2	Bcl6,Cd38	positive regulation of B cell activation	0.791326
GO:0060537	1.13126	0.725189	163	10	Cav2,Homer1,Prox1,Wnt2,Pitx1,Megf10,Foxp2,Foxh1,Cdon,Six1	muscle tissue development	0.798582
GO:0051347	1.1237	0.726074	164	10	Frs2,Gadd45g,Serinc5,Nox4,Card10,Vav3,F2r,Spdya,Nrk,Acvr2b	positive regulation of transferase activity	0.798593
GO:0030900	1.10157	0.729244	167	10	Prox1,Gata2,Tnr,Rfx4,Frs2,Pitx1,Foxp2,Eomes,Cdon,Tctn1	forebrain development	0.801117
GO:0019725	1.08729	0.731768	169	10	Cacna1e,Stc2,Vdr,Htr2b,Casq2,Nox4,Trpc6,Wnk4,F2r,Tpcn2	cellular homeostasis	0.801261
GO:0045664	1.08729	0.731768	169	10	D130043K22Rik,Bmp7,Prox1,Tnr,Stk25,Eomes,Cdon,Six1,Kndc1,Zhx2	regulation of neuron differentiation	0.801261
GO:0006323	1.26423	0.732882	44	3	Hist1h4j,Hist1h4n,Hist1h4m	DNA packaging	0.801261
GO:0045598	1.26423	0.732882	44	3	Gata2,Crebl2,Zbtb16	regulation of fat cell differentiation	0.801261
GO:0001818	1.23391	0.735801	45	3	Ndrg2,Gata3,Bcl6	negative regulation of cytokine production	0.801576
GO:0045621	1.23391	0.735801	45	3	Gata3,Il15,Vnn1	positive regulation of lymphocyte differentiation	0.801576
GO:0050795	1.23391	0.735801	45	3	Il16,Htr2b,Ccl5	regulation of behavior	0.801576
GO:0007243	1.20499	0.738955	46	3	Mark1,Dapk2,Wnk4	intracellular protein kinase cascade	0.804054
GO:0001817	1.08694	0.74291	186	11	Icosl,Ndrg2,Mpl,Gata3,Bcl6,Htr2b,Bcl10,Myd88,Ackr1,F2r,Agtr1a	regulation of cytokine production	0.80584
GO:0006865	1.15101	0.745887	48	3	Slc1a3,Ctns,Pqlc2	amino acid transport	0.80584
GO:0009636	1.15101	0.745887	48	3	Slc1a3,Slc23a1,Pink1	response to toxin	0.80584
GO:0017157	1.15101	0.745887	48	3	Pram1,Lgi3,Exph5	regulation of exocytosis	0.80584
GO:0042476	1.15101	0.745887	48	3	Bmp7,Fam20a,Acvr2b	odontogenesis	0.80584
GO:0043491	1.15101	0.745887	48	3	Ypel1,Nox4,Lingo1	protein kinase B signaling cascade	0.80584
GO:0001508	1.12578	0.749625	49	3	Glra1,Serinc5,Kcnj2	regulation of action potential	0.807969
GO:0030705	1.12578	0.749625	49	3	Fyco1,Ap3m2,Bicd2	cytoskeleton-dependent intracellular transport	0.807969
GO:0000082	1.10161	0.753521	50	3	Nfatc1,Spdya,Slfn1	G1/S transition of mitotic cell cycle	0.809304
GO:0031647	1.10161	0.753521	50	3	D7Ertd443e,Crebl2,Mylip	regulation of protein stability	0.809304
GO:0071222	1.10161	0.753521	50	3	Shpk,Nos3,Myd88	cellular response to lipopolysaccharide	0.809304
GO:0050851	1.05629	0.761716	52	3	Gata3,Bcl10,Txk	antigen receptor-mediated signaling pathway	0.817146
GO:0006006	1.03495	0.765983	53	3	Gnmt,Shpk,Aldh5a1	glucose metabolic process	0.819799
GO:0007224	1.03495	0.765983	53	3	Fuz,Cdon,Tctn1	smoothened signaling pathway	0.819799
GO:0019228	1.17124	0.776843	63	4	Serinc5,Ypel1,Wasf3,Tg	regulation of action potential in neuron	0.82948
GO:0042129	1.17124	0.776843	63	4	Icosl,Itch,Il15,Slfn1	regulation of T cell proliferation	0.82948
GO:0007179	1.1515	0.778721	64	4	Cav2,Rnf111,Foxh1,Dand5	transforming growth factor beta receptor signaling pathway	0.830515
GO:0043122	1.09604	0.785231	67	4	Htr2b,Bcl10,Myd88,F2r	regulation of I-kappaB kinase/NF-kappaB cascade	0.836481
GO:0030218	1.0787	0.787661	68	4	Gata2,Gata3,Bcl6,Sp3	erythrocyte differentiation	0.837119
GO:0046328	1.0787	0.787661	68	4	Itch,Myd88,Ephb1,Nrk	regulation of JNK cascade	0.837119
GO:0071560	1.04566	0.792858	70	4	Cav2,Rnf111,Foxh1,Dand5	cellular response to transforming growth factor beta stimulus	0.841664
GO:0060070	1.10706	0.805769	83	5	Wnt2,Gata3,Ube2b,Cdh2,Amer1	canonical Wnt receptor signaling pathway	0.854377
GO:0050804	1.09283	0.807257	84	5	Slc1a3,Tnr,P2rx3,Pink1,Syp	regulation of synaptic transmission	0.854963
GO:0043523	1.06549	0.810536	86	5	Gata3,Pink1,Casp9,F2r,Six1	regulation of neuron apoptotic process	0.857442
GO:0042098	1.05229	0.812316	87	5	Icosl,Itch,Il15,Itgad,Slfn1	T cell proliferation	0.858332
GO:1901214	1.02684	0.816133	89	5	Gata3,Pink1,Casp9,F2r,Six1	regulation of neuron death	0.861369
GO:0021537	1.11469	0.821779	99	6	Prox1,Tnr,Foxp2,Eomes,Cdon,Tctn1	telencephalon development	0.864333
GO:0034220	1.11469	0.821779	99	6	Cacna1e,Homer1,Casq2,Scnn1a,Trpc6,Slc39a3	ion transmembrane transport	0.864333
GO:0046777	1.11469	0.821779	99	6	Errfi1,Stk33,Ephb1,Myo3b,Flt3,Rap2c	protein autophosphorylation	0.864333
GO:0046578	1.09079	0.823703	101	6	Evi5l,Bcl6,Htr2b,Ralgapb,Rasa3,F2r	regulation of Ras protein signal transduction	0.865361
GO:0031589	1.07922	0.824795	102	6	Vwf,Bcl6,Vamp3,Ephb1,Spock2,Mia	cell-substrate adhesion	0.865514
GO:0002460	1.05684	0.827222	104	6	Lyst,Gadd45g,Bcl6,Bcl10,Myd88,H2-Ab1	adaptive immune response based on somatic recombination of immune receptors built from immunoglobulin superfamily domains	0.867066
GO:0002237	1.04596	0.828551	105	6	Shpk,Ly96,Bcl10,Nos3,Myd88,F2r	response to molecule of bacterial origin	0.867463
GO:0001933	1.02485	0.831419	107	6	Bmp7,Ube2b,Gadd45g,Adar,Errfi1,Slfn1	negative regulation of protein phosphorylation	0.869471
GO:0030031	1.06019	0.839108	121	7	Fuz,Cep290,Ube2b,Wasf3,Vav3,Rfx3,Myo3b	cell projection assembly	0.876508
GO:0071345	1.05077	0.840081	122	7	Shpk,Gata3,Ifi202b,Pyhin1,Ifit2,Ifnlr1,H2-Ab1	cellular response to cytokine stimulus	0.876523
GO:0055085	1.01466	0.844574	126	7	Cacna1e,Homer1,Slc28a3,Casq2,Scnn1a,Trpc6,Slc39a3	transmembrane transport	0.880206
GO:0045860	1.07123	0.848203	137	8	Frs2,Gadd45g,Nox4,Card10,F2r,Spdya,Nrk,Acvr2b	positive regulation of protein kinase activity	0.882981
GO:0043086	1.04973	0.871242	192	11	Bmp7,Gadd45g,Xiap,Ifi202b,Adar,Errfi1,Nos3,Amot,Serpinb6b,Sh3rf2,Slc7a14	negative regulation of catalytic activity	0.905933
GO:0000079	1.01437	1	18	1	Spdya	regulation of cyclin-dependent protein kinase activity	1
GO:0000578	1.01437	1	18	1	Frs2	embryonic axis specification	1
GO:0001832	1.01437	1	18	1	Ubtfl1	blastocyst growth	1
GO:0001909	1.01442	1	36	2	Klrb1c,Sh2d1b2	leukocyte mediated cytotoxicity	1
GO:0002089	1.01437	1	18	1	Prox1	lens morphogenesis in camera-type eye	1
GO:0003382	1.01437	1	18	1	Pax8	epithelial cell morphogenesis	1
GO:0006308	1.01437	1	18	1	Dnase1l3	DNA catabolic process	1
GO:0006417	1.01451	1	72	4	Ybx2,Dnajc1,Paip2,Pym1	regulation of translation	1
GO:0006954	1.00127	1	164	9	Shpk,Bcl6,Myd88,Vnn1,Ackr1,F2r,Agtr1a,Cd47,S100a9	inflammatory response	1
GO:0007259	1.01442	1	36	2	Ccl5,F2r	JAK-STAT cascade	1
GO:0007411	1.00257	1	91	5	Bmp7,Gata3,Matn2,Ephb1,Lamb2	axon guidance	1
GO:0009165	1.01446	1	54	3	Htr2b,Nadsyn1,Gucy1a2	nucleotide biosynthetic process	1
GO:0010506	1.01437	1	18	1	Htr2b	regulation of autophagy	1
GO:0016079	1.01437	1	18	1	Stx4a	synaptic vesicle exocytosis	1
GO:0016571	1.01446	1	54	3	Gata3,Kmt2d,Prdm9	histone methylation	1
GO:0021988	1.01437	1	18	1	Eomes	olfactory lobe development	1
GO:0032496	1.00257	1	91	5	Shpk,Ly96,Nos3,Myd88,F2r	response to lipopolysaccharide	1
GO:0032611	1.01437	1	18	1	F2r	interleukin-1 beta production	1
GO:0033627	1.01437	1	18	1	Ccl5	cell adhesion mediated by integrin	1
GO:0034101	1.01451	1	72	4	Gata2,Gata3,Bcl6,Sp3	erythrocyte homeostasis	1
GO:0043583	1.00456	1	109	6	Prox1,Gata2,Gata3,Cep290,Pax8,Six1	ear development	1
GO:0045103	1.01437	1	18	1	Sync	intermediate filament-based process	1
GO:0045727	1.01437	1	18	1	Pym1	positive regulation of translation	1
GO:0048146	1.01437	1	18	1	Fbrs	positive regulation of fibroblast proliferation	1
GO:0048167	1.01446	1	54	3	Tnr,P2rx3,Syp	regulation of synaptic plasticity	1
GO:0048639	1.01437	1	18	1	Prox1	positive regulation of developmental growth	1
GO:0050727	1.00257	1	91	5	Shpk,Bcl6,Myd88,Cd47,S100a9	regulation of inflammatory response	1
GO:0050856	1.01437	1	18	1	Bcl10	regulation of T cell receptor signaling pathway	1
GO:0051149	1.01437	1	18	1	Cdon	positive regulation of muscle cell differentiation	1
GO:0051653	1.01437	1	18	1	Dynlt1c	spindle localization	1
GO:0055013	1.01437	1	18	1	Prox1	cardiac muscle cell development	1
GO:0060412	1.01437	1	18	1	Prox1	ventricular septum morphogenesis	1
GO:0071383	1.01437	1	18	1	Casp9	cellular response to steroid hormone stimulus	1
GO:0071482	1.01437	1	18	1	Rs1	cellular response to light stimulus	1
GO:0090102	1.01437	1	18	1	Six1	cochlea development	1

## Sheet: component 6 negative
	odds.ratio	p.value	n.categoy	n.category.and.component	genes	description	FDR
GO:0006970	13.8017	0.00223499	16	3	Pdpk1,Slc12a6,Tsc22d3	response to osmotic stress	0.591751
GO:0055072	9.43558	0.0057115	22	3	Slc40a1,Htt,Mon1a	iron ion homeostasis	0.591751
GO:0030433	8.53509	0.00732575	24	3	Usp19,Derl2,Nploc4	ER-associated protein catabolic process	0.591751
GO:0017148	7.46626	0.0102074	27	3	Ago3,Ago1,Tia1	negative regulation of translation	0.591751
GO:0070301	14.8031	0.0116529	10	2	Gpx3,Rhob	cellular response to hydrogen peroxide	0.591751
GO:0007224	4.90825	0.0119325	53	4	Glis2,Kif3a,2700049A03Rik,Tmem17	smoothened signaling pathway	0.591751
GO:0010657	13.1581	0.0140868	11	2	Pdpk1,Gnb1	muscle cell apoptotic process	0.591751
GO:0045843	13.1581	0.0140868	11	2	Usp19,Tsc22d3	negative regulation of striated muscle tissue development	0.591751
GO:0010608	2.90869	0.0149406	154	7	Usp19,Fbxw11,Ago3,Trnau1ap,Ago1,Aak1,Tia1	posttranscriptional regulation of gene expression	0.591751
GO:0015813	11.8376	0.0167197	12	2	Htt,Kcnj10	L-glutamate transport	0.591751
GO:0006352	10.7656	0.0195443	13	2	Ttf1,Tcf4	DNA-dependent transcription, initiation	0.591751
GO:0050709	9.86269	0.0225536	14	2	Rsad2,Gas6	negative regulation of protein secretion	0.591751
GO:0007034	8.4541	0.0290985	16	2	Chmp7,Rhob	vacuolar transport	0.591751
GO:0071453	8.4541	0.0290985	16	2	Usp19,Gnb1	cellular response to oxygen levels	0.591751
GO:0071456	8.4541	0.0290985	16	2	Usp19,Gnb1	cellular response to hypoxia	0.591751
GO:0034599	4.70531	0.03141	41	3	Gpx3,Diablo,Rhob	cellular response to oxidative stress	0.591751
GO:0043161	3.01229	0.0318789	105	5	Crbn,Usp19,Derl2,Fbxw11,Nploc4	proteasomal ubiquitin-dependent protein catabolic process	0.591751
GO:0006090	7.89005	0.0326208	17	2	Pdk4,Htt	pyruvate metabolic process	0.591751
GO:0006417	3.52517	0.0329336	72	4	Ago3,Trnau1ap,Ago1,Tia1	regulation of translation	0.591751
GO:0010498	2.92298	0.03539	108	5	Crbn,Usp19,Derl2,Fbxw11,Nploc4	proteasomal protein catabolic process	0.591751
GO:0001779	7.39696	0.0363012	18	2	Tusc2,Gas6	natural killer cell differentiation	0.591751
GO:0019079	7.39696	0.0363012	18	2	Rsad2,Gas6	viral genome replication	0.591751
GO:0048146	7.39696	0.0363012	18	2	Xrcc4,Gas6	positive regulation of fibroblast proliferation	0.591751
GO:0001755	6.5723	0.0441112	20	2	Ednrb,Nrp2	neural crest cell migration	0.591751
GO:0002367	6.22559	0.0482289	21	2	Rsad2,Gas6	cytokine production involved in immune response	0.591751
GO:0042542	6.22559	0.0482289	21	2	Gpx3,Rhob	response to hydrogen peroxide	0.591751
GO:0001666	3.7983	0.0518525	50	3	Ubqln1,Usp19,Gnb1	response to hypoxia	0.591751
GO:0031647	3.7983	0.0518525	50	3	Usp19,Fbxw11,Aak1	regulation of protein stability	0.591751
GO:0050801	2.33466	0.0542425	161	6	Micu1,Ednrb,Slc40a1,Htt,Mon1a,Kcnj10	ion homeostasis	0.591751
GO:0006835	5.63115	0.0568609	23	2	Htt,Kcnj10	dicarboxylic acid transport	0.591751
GO:0007006	5.63115	0.0568609	23	2	Htt,Chchd6	mitochondrial membrane organization	0.591751
GO:0048641	5.63115	0.0568609	23	2	Usp19,Tsc22d3	regulation of skeletal muscle tissue development	0.591751
GO:0015807	5.37462	0.0613641	24	2	Htt,Kcnj10	L-amino acid transport	0.591751
GO:0031047	5.37462	0.0613641	24	2	Ago3,Ago1	gene silencing by RNA	0.591751
GO:0034614	5.37462	0.0613641	24	2	Gpx3,Rhob	cellular response to reactive oxygen species	0.591751
GO:0006606	2.81178	0.063117	89	4	Fbxw11,Htt,Gas6,Ipo11	protein import into nucleus	0.591751
GO:0008542	5.13969	0.0659849	25	2	Hmgcr,Htt	visual learning	0.591751
GO:0051170	2.74617	0.067383	91	4	Fbxw11,Htt,Gas6,Ipo11	nuclear import	0.591751
GO:0007632	4.92507	0.0707183	26	2	Hmgcr,Htt	visual behavior	0.591751
GO:0043524	3.24124	0.0742261	58	3	Dnajc5,Xrcc4,Htt	negative regulation of neuron apoptotic process	0.591751
GO:0017038	2.62349	0.076354	95	4	Fbxw11,Htt,Gas6,Ipo11	protein import	0.591751
GO:0016197	3.1828	0.0772821	59	3	Htt,Chmp7,Rhob	endosomal transport	0.591751
GO:0051262	4.54498	0.0805027	28	2	Gpx3,Cbr2	protein tetramerization	0.591751
GO:0090316	4.54498	0.0805027	28	2	Rbm22,Gas6	positive regulation of intracellular protein transport	0.591751
GO:0090317	4.54498	0.0805027	28	2	Fbxw11,Gas6	negative regulation of intracellular protein transport	0.591751
GO:0001667	2.56625	0.0810555	97	4	Ednrb,Pdpk1,Zfand5,Nrp2	ameboidal cell migration	0.591751
GO:0060485	2.56625	0.0810555	97	4	Pofut2,Ednrb,Nrp2,Htt	mesenchyme development	0.591751
GO:0014032	4.37574	0.0855439	29	2	Ednrb,Nrp2	neural crest cell development	0.591751
GO:0030307	4.37574	0.0855439	29	2	Derl2,Ist1	positive regulation of cell growth	0.591751
GO:0061025	4.37574	0.0855439	29	2	Gas6,Vat1	membrane fusion	0.591751
GO:0043281	3.01938	0.0867759	62	3	Apaf1,Diablo,Gas6	regulation of cysteine-type endopeptidase activity involved in apoptotic process	0.591751
GO:0051402	2.4848	0.0883717	100	4	Dnajc5,Apaf1,Xrcc4,Htt	neuron apoptotic process	0.591751
GO:0030101	4.07281	0.0959015	31	2	Tusc2,Gas6	natural killer cell activation	0.591751
GO:0014031	2.87178	0.0967396	65	3	Pofut2,Ednrb,Nrp2	mesenchymal cell development	0.591751
GO:0070997	2.38357	0.0986076	104	4	Dnajc5,Apaf1,Xrcc4,Htt	neuron death	0.591751
GO:0051494	3.93644	0.101209	32	2	Twf1,Kank2	negative regulation of cytoskeleton organization	0.591751
GO:0051051	2.35956	0.10125	105	4	Fbxw11,Rsad2,Psmd9,Gas6	negative regulation of transport	0.591751
GO:0006605	2.10522	0.10246	147	5	Fbxw11,Erbb2ip,Htt,Gas6,Ipo11	protein targeting	0.591751
GO:0002224	3.80893	0.106596	33	2	Rsad2,Pdpk1	toll-like receptor signaling pathway	0.591751
GO:0014033	3.80893	0.106596	33	2	Ednrb,Nrp2	neural crest cell differentiation	0.591751
GO:0009314	2.06053	0.109236	150	5	Xrcc4,Hmgcr,Gnb1,Htt,Rhob	response to radiation	0.591751
GO:0006919	3.68947	0.11206	34	2	Apaf1,Diablo	activation of cysteine-type endopeptidase activity involved in apoptotic process	0.591751
GO:0008306	3.68947	0.11206	34	2	Hmgcr,Htt	associative learning	0.591751
GO:0032387	3.68947	0.11206	34	2	Fbxw11,Gas6	negative regulation of intracellular transport	0.591751
GO:0048762	2.61556	0.117975	71	3	Pofut2,Ednrb,Nrp2	mesenchymal cell differentiation	0.591751
GO:0051223	2.20393	0.120648	112	4	Fbxw11,Rsad2,Rbm22,Gas6	regulation of protein transport	0.591751
GO:0030833	3.47103	0.123198	36	2	Twf1,Rictor	regulation of actin filament polymerization	0.591751
GO:0001707	3.37129	0.128865	37	2	Pofut2,Htt	mesoderm formation	0.591751
GO:0009306	2.5038	0.129194	74	3	Rsad2,Gas6,Mon1a	protein secretion	0.591751
GO:0032956	2.5038	0.129194	74	3	Twf1,Kank2,Rictor	regulation of actin cytoskeleton organization	0.591751
GO:0051603	2.04803	0.129414	182	6	Crbn,Usp19,Derl2,Fbxw11,Nploc4,Lonp2	proteolysis involved in cellular protein catabolic process	0.591751
GO:0006402	3.27708	0.134592	38	2	Ago3,Ago1	mRNA catabolic process	0.591751
GO:0034968	3.27708	0.134592	38	2	Suv420h1,Setdb2	histone lysine methylation	0.591751
GO:0051896	3.27708	0.134592	38	2	Gas6,Rictor	regulation of protein kinase B signaling cascade	0.591751
GO:0044257	1.97844	0.136058	188	6	Crbn,Usp19,Derl2,Fbxw11,Nploc4,Lonp2	cellular protein catabolic process	0.591751
GO:0060271	2.36853	0.144716	78	3	Kif3a,2700049A03Rik,Tmem17	cilium morphogenesis	0.591751
GO:0048332	3.10353	0.146214	40	2	Pofut2,Htt	mesoderm morphogenesis	0.591751
GO:0000302	3.02345	0.152101	41	2	Gpx3,Rhob	response to reactive oxygen species	0.591751
GO:0009267	3.02345	0.152101	41	2	Gas6,Atg5	cellular response to starvation	0.591751
GO:0031638	3.02345	0.152101	41	2	Apaf1,Diablo	zymogen activation	0.591751
GO:0043280	3.02345	0.152101	41	2	Apaf1,Diablo	positive regulation of cysteine-type endopeptidase activity involved in apoptotic process	0.591751
GO:0050731	3.02345	0.152101	41	2	Gas6,Rictor	positive regulation of peptidyl-tyrosine phosphorylation	0.591751
GO:0006695	6.51301	0.156886	10	1	Hmgcr	cholesterol biosynthetic process	0.591751
GO:0006910	6.51301	0.156886	10	1	Colec12	phagocytosis, recognition	0.591751
GO:0008333	6.51301	0.156886	10	1	Rhob	endosome to lysosome transport	0.591751
GO:0033146	6.51301	0.156886	10	1	Kank2	regulation of intracellular estrogen receptor signaling pathway	0.591751
GO:0033151	6.51301	0.156886	10	1	Xrcc4	V(D)J recombination	0.591751
GO:0042036	6.51301	0.156886	10	1	Tia1	negative regulation of cytokine biosynthetic process	0.591751
GO:0043687	6.51301	0.156886	10	1	Atg5	post-translational protein modification	0.591751
GO:0046902	6.51301	0.156886	10	1	Htt	regulation of mitochondrial membrane permeability	0.591751
GO:0060972	6.51301	0.156886	10	1	Setdb2	left/right pattern formation	0.591751
GO:0070509	6.51301	0.156886	10	1	Micu1	calcium ion import	0.591751
GO:0006412	1.97916	0.157264	124	4	Ago3,Trnau1ap,Ago1,Tia1	translation	0.591751
GO:0002218	2.94737	0.158035	42	2	Rsad2,Pdpk1	activation of innate immune response	0.591751
GO:0030041	2.94737	0.158035	42	2	Twf1,Rictor	actin filament polymerization	0.591751
GO:0043433	2.94737	0.158035	42	2	Glis2,Gas6	negative regulation of sequence-specific DNA binding transcription factor activity	0.591751
GO:2001056	2.94737	0.158035	42	2	Apaf1,Diablo	positive regulation of cysteine-type endopeptidase activity	0.591751
GO:0070201	1.96244	0.160488	125	4	Fbxw11,Rsad2,Rbm22,Gas6	regulation of establishment of protein localization	0.591751
GO:0032970	2.24696	0.160822	82	3	Twf1,Kank2,Rictor	regulation of actin filament-based process	0.591751
GO:0008064	2.87499	0.164013	43	2	Twf1,Rictor	regulation of actin polymerization or depolymerization	0.591751
GO:0032388	2.87499	0.164013	43	2	Rbm22,Gas6	positive regulation of intracellular transport	0.591751
GO:0010950	2.80607	0.17003	44	2	Apaf1,Diablo	positive regulation of endopeptidase activity	0.591751
GO:0030832	2.80607	0.17003	44	2	Twf1,Rictor	regulation of actin filament length	0.591751
GO:0042594	2.80607	0.17003	44	2	Gas6,Atg5	response to starvation	0.591751
GO:0007602	5.86125	0.171166	11	1	Gnb1	phototransduction	0.591751
GO:0032689	5.86125	0.171166	11	1	Gas6	negative regulation of interferon-gamma production	0.591751
GO:0033209	5.86125	0.171166	11	1	Gas6	tumor necrosis factor-mediated signaling pathway	0.591751
GO:0043043	5.86125	0.171166	11	1	Hagh	peptide biosynthetic process	0.591751
GO:0043304	5.86125	0.171166	11	1	Pdpk1	regulation of mast cell degranulation	0.591751
GO:0045071	5.86125	0.171166	11	1	Rsad2	negative regulation of viral genome replication	0.591751
GO:0045747	5.86125	0.171166	11	1	Aak1	positive regulation of Notch signaling pathway	0.591751
GO:0045879	5.86125	0.171166	11	1	Glis2	negative regulation of smoothened signaling pathway	0.591751
GO:0046676	5.86125	0.171166	11	1	Psmd9	negative regulation of insulin secretion	0.591751
GO:0048745	5.86125	0.171166	11	1	Zfand5	smooth muscle tissue development	0.591751
GO:0051492	5.86125	0.171166	11	1	Kank2	regulation of stress fiber assembly	0.591751
GO:0071479	5.86125	0.171166	11	1	Rhob	cellular response to ionizing radiation	0.591751
GO:0071526	5.86125	0.171166	11	1	Nrp2	semaphorin-plexin signaling pathway	0.591751
GO:0072661	5.86125	0.171166	11	1	Gas6	protein targeting to plasma membrane	0.591751
GO:0034976	2.74023	0.176085	45	2	Usp19,Derl2	response to endoplasmic reticulum stress	0.591751
GO:0042306	2.74023	0.176085	45	2	Fbxw11,Gas6	regulation of protein import into nucleus	0.591751
GO:0043523	2.13723	0.177448	86	3	Dnajc5,Xrcc4,Htt	regulation of neuron apoptotic process	0.591751
GO:0010035	2.1114	0.181679	87	3	Gpx3,Htt,Rhob	response to inorganic substance	0.591751
GO:0007243	2.67753	0.182174	46	2	Raf1,Dapk3	intracellular protein kinase cascade	0.591751
GO:0000002	5.3284	0.185206	12	1	Tk2	mitochondrial genome maintenance	0.591751
GO:0002320	5.3284	0.185206	12	1	Xrcc4	lymphoid progenitor cell differentiation	0.591751
GO:0006303	5.3284	0.185206	12	1	Xrcc4	double-strand break repair via nonhomologous end joining	0.591751
GO:0006309	5.3284	0.185206	12	1	Apaf1	apoptotic DNA fragmentation	0.591751
GO:0006360	5.3284	0.185206	12	1	Ttf1	transcription from RNA polymerase I promoter	0.591751
GO:0006879	5.3284	0.185206	12	1	Mon1a	cellular iron ion homeostasis	0.591751
GO:0007029	5.3284	0.185206	12	1	Htt	endoplasmic reticulum organization	0.591751
GO:0016126	5.3284	0.185206	12	1	Hmgcr	sterol biosynthetic process	0.591751
GO:0021904	5.3284	0.185206	12	1	Kif3a	dorsal/ventral neural tube patterning	0.591751
GO:0030225	5.3284	0.185206	12	1	Thoc5	macrophage differentiation	0.591751
GO:0032816	5.3284	0.185206	12	1	Gas6	positive regulation of natural killer cell activation	0.591751
GO:0034122	5.3284	0.185206	12	1	Pdpk1	negative regulation of toll-like receptor signaling pathway	0.591751
GO:0035176	5.3284	0.185206	12	1	Htt	social behavior	0.591751
GO:0042345	5.3284	0.185206	12	1	Fbxw11	regulation of NF-kappaB import into nucleus	0.591751
GO:0042743	5.3284	0.185206	12	1	Gpx3	hydrogen peroxide metabolic process	0.591751
GO:0046825	5.3284	0.185206	12	1	Gas6	regulation of protein export from nucleus	0.591751
GO:0071805	5.3284	0.185206	12	1	Kcnj10	potassium ion transmembrane transport	0.591751
GO:0090162	5.3284	0.185206	12	1	Frmd4b	establishment of epithelial cell polarity	0.591751
GO:2000134	5.3284	0.185206	12	1	Kank2	negative regulation of G1/S transition of mitotic cell cycle	0.591751
GO:0006979	2.08616	0.185936	88	3	Gpx3,Diablo,Rhob	response to oxidative stress	0.591751
GO:0006401	2.6176	0.188295	47	2	Ago3,Ago1	RNA catabolic process	0.591751
GO:0016202	2.6176	0.188295	47	2	Usp19,Tsc22d3	regulation of striated muscle tissue development	0.591751
GO:0030073	2.6176	0.188295	47	2	Htt,Psmd9	insulin secretion	0.591751
GO:0006917	2.06155	0.190221	89	3	Cdip1,Casp4,Dapk3	induction of apoptosis	0.591751
GO:1901214	2.06155	0.190221	89	3	Dnajc5,Xrcc4,Htt	regulation of neuron death	0.591751
GO:0006865	2.56032	0.194444	48	2	Htt,Kcnj10	amino acid transport	0.591751
GO:0031669	2.56032	0.194444	48	2	Gas6,Atg5	cellular response to nutrient levels	0.591751
GO:0043491	2.56032	0.194444	48	2	Gas6,Rictor	protein kinase B signaling cascade	0.591751
GO:0032535	2.03749	0.194531	90	3	Twf1,Ist1,Rictor	regulation of cellular component size	0.591751
GO:0002066	4.88334	0.199011	13	1	Pdpk1	columnar/cuboidal epithelial cell development	0.591751
GO:0006400	4.88334	0.199011	13	1	Thg1l	tRNA modification	0.591751
GO:0006826	4.88334	0.199011	13	1	Slc40a1	iron ion transport	0.591751
GO:0007041	4.88334	0.199011	13	1	Rhob	lysosomal transport	0.591751
GO:0007212	4.88334	0.199011	13	1	Htt	dopamine receptor signaling pathway	0.591751
GO:0010165	4.88334	0.199011	13	1	Xrcc4	response to X-ray	0.591751
GO:0010761	4.88334	0.199011	13	1	Zfand5	fibroblast migration	0.591751
GO:0031146	4.88334	0.199011	13	1	Fbxw11	SCF-dependent proteasomal ubiquitin-dependent protein catabolic process	0.591751
GO:0032272	4.88334	0.199011	13	1	Twf1	negative regulation of protein polymerization	0.591751
GO:0032314	4.88334	0.199011	13	1	Rictor	regulation of Rac GTPase activity	0.591751
GO:0043303	4.88334	0.199011	13	1	Pdpk1	mast cell degranulation	0.591751
GO:0046513	4.88334	0.199011	13	1	Samd8	ceramide biosynthetic process	0.591751
GO:0048011	4.88334	0.199011	13	1	Raf1	nerve growth factor receptor signaling pathway	0.591751
GO:0055012	4.88334	0.199011	13	1	Atg5	ventricular cardiac muscle cell differentiation	0.591751
GO:0072676	4.88334	0.199011	13	1	Gas6	lymphocyte migration	0.591751
GO:0032880	1.89889	0.199066	162	5	Fbxw11,Rsad2,Rbm22,Gas6,Aak1	regulation of protein localization	0.591751
GO:0001508	2.50541	0.200619	49	2	Kcnj10,Kcnd2	regulation of action potential	0.591751
GO:0008217	2.45294	0.206818	50	2	Ednrb,Gas6	regulation of blood pressure	0.591751
GO:0010952	2.45294	0.206818	50	2	Apaf1,Diablo	positive regulation of peptidase activity	0.591751
GO:0050708	2.45294	0.206818	50	2	Rsad2,Gas6	regulation of protein secretion	0.591751
GO:0052547	1.96851	0.207605	93	3	Apaf1,Diablo,Gas6	regulation of peptidase activity	0.591751
GO:0006511	1.81538	0.210538	169	5	Crbn,Usp19,Derl2,Fbxw11,Nploc4	ubiquitin-dependent protein catabolic process	0.591751
GO:0000060	4.50724	0.212585	14	1	Gas6	protein import into nucleus, translocation	0.591751
GO:0009262	4.50724	0.212585	14	1	Tk2	deoxyribonucleotide metabolic process	0.591751
GO:0009583	4.50724	0.212585	14	1	Gnb1	detection of light stimulus	0.591751
GO:0010717	4.50724	0.212585	14	1	Pofut2	regulation of epithelial to mesenchymal transition	0.591751
GO:0030224	4.50724	0.212585	14	1	Thoc5	monocyte differentiation	0.591751
GO:0046888	4.50724	0.212585	14	1	Psmd9	negative regulation of hormone secretion	0.591751
GO:0050701	4.50724	0.212585	14	1	Gas6	interleukin-1 secretion	0.591751
GO:0051567	4.50724	0.212585	14	1	Setdb2	histone H3-K9 methylation	0.591751
GO:0001704	2.40223	0.213037	51	2	Pofut2,Htt	formation of primary germ layer	0.591751
GO:0042384	2.40223	0.213037	51	2	Kif3a,Tmem17	cilium assembly	0.591751
GO:0032269	1.79289	0.21415	171	5	Hmgcr,Ago3,Atg5,Ago1,Tia1	negative regulation of cellular protein metabolic process	0.591751
GO:0019941	1.76012	0.21983	174	5	Crbn,Usp19,Derl2,Fbxw11,Nploc4	modification-dependent protein catabolic process	0.591751
GO:0003016	4.18453	0.225931	15	1	Zfand5	respiratory system process	0.591751
GO:0006635	4.18453	0.225931	15	1	Abcd2	fatty acid beta-oxidation	0.591751
GO:0006885	4.18453	0.225931	15	1	Ednrb	regulation of pH	0.591751
GO:0010259	4.18453	0.225931	15	1	Htt	multicellular organismal aging	0.591751
GO:0014003	4.18453	0.225931	15	1	Kcnj10	oligodendrocyte development	0.591751
GO:0033003	4.18453	0.225931	15	1	Pdpk1	regulation of mast cell activation	0.591751
GO:0033143	4.18453	0.225931	15	1	Kank2	regulation of intracellular steroid hormone receptor signaling pathway	0.591751
GO:0042752	4.18453	0.225931	15	1	Fbxw11	regulation of circadian rhythm	0.591751
GO:0043277	4.18453	0.225931	15	1	Gas6	apoptotic cell clearance	0.591751
GO:0048339	4.18453	0.225931	15	1	Htt	paraxial mesoderm development	0.591751
GO:0051289	4.18453	0.225931	15	1	Gpx3	protein homotetramerization	0.591751
GO:0072384	4.18453	0.225931	15	1	Htt	organelle transport along microtubule	0.591751
GO:0007612	2.26253	0.231797	54	2	Hmgcr,Htt	learning	0.591751
GO:0016571	2.26253	0.231797	54	2	Suv420h1,Setdb2	histone methylation	0.591751
GO:0030072	2.26253	0.231797	54	2	Htt,Psmd9	peptide hormone secretion	0.591751
GO:0048167	2.26253	0.231797	54	2	Htt,Kcnj10	regulation of synaptic plasticity	0.591751
GO:0009416	1.84354	0.234314	99	3	Hmgcr,Gnb1,Htt	response to light stimulus	0.591751
GO:0008154	2.21958	0.238076	55	2	Twf1,Rictor	actin polymerization or depolymerization	0.591751
GO:0002762	3.90522	0.239053	16	1	Thoc5	negative regulation of myeloid leukocyte differentiation	0.591751
GO:0002828	3.90522	0.239053	16	1	Rsad2	regulation of type 2 immune response	0.591751
GO:0006414	3.90522	0.239053	16	1	Trnau1ap	translational elongation	0.591751
GO:0006493	3.90522	0.239053	16	1	Pofut2	protein O-linked glycosylation	0.591751
GO:0010594	3.90522	0.239053	16	1	Pdpk1	regulation of endothelial cell migration	0.591751
GO:0021952	3.90522	0.239053	16	1	Cdh11	central nervous system projection neuron axonogenesis	0.591751
GO:0030262	3.90522	0.239053	16	1	Apaf1	apoptotic nuclear changes	0.591751
GO:0030279	3.90522	0.239053	16	1	Gfra4	negative regulation of ossification	0.591751
GO:0030514	3.90522	0.239053	16	1	Htra1	negative regulation of BMP signaling pathway	0.591751
GO:0030520	3.90522	0.239053	16	1	Kank2	intracellular estrogen receptor signaling pathway	0.591751
GO:0042992	3.90522	0.239053	16	1	Fbxw11	negative regulation of transcription factor import into nucleus	0.591751
GO:0043149	3.90522	0.239053	16	1	Kank2	stress fiber assembly	0.591751
GO:0043966	3.90522	0.239053	16	1	Kat2a	histone H3 acetylation	0.591751
GO:0048169	3.90522	0.239053	16	1	Kcnj10	regulation of long-term neuronal synaptic plasticity	0.591751
GO:0051881	3.90522	0.239053	16	1	Htt	regulation of mitochondrial membrane potential	0.591751
GO:0016458	2.17801	0.244365	56	2	Ago3,Ago1	gene silencing	0.591751
GO:0042493	2.17801	0.244365	56	2	Gas6,Atg5	response to drug	0.591751
GO:0002790	2.13801	0.250661	57	2	Htt,Psmd9	peptide secretion	0.591751
GO:0006909	2.13801	0.250661	57	2	Gas6,Colec12	phagocytosis	0.591751
GO:0007368	2.13801	0.250661	57	2	Kif3a,Setdb2	determination of left/right symmetry	0.591751
GO:0010212	2.13801	0.250661	57	2	Xrcc4,Rhob	response to ionizing radiation	0.591751
GO:0045089	2.13801	0.250661	57	2	Rsad2,Pdpk1	positive regulation of innate immune response	0.591751
GO:0050769	2.13801	0.250661	57	2	Xrcc4,Ist1	positive regulation of neurogenesis	0.591751
GO:0000045	3.66093	0.251955	17	1	Atg5	autophagic vacuole assembly	0.591751
GO:0000086	3.66093	0.251955	17	1	Ppm1d	G2/M transition of mitotic cell cycle	0.591751
GO:0030148	3.66093	0.251955	17	1	Samd8	sphingolipid biosynthetic process	0.591751
GO:0030512	3.66093	0.251955	17	1	Htra1	negative regulation of transforming growth factor beta receptor signaling pathway	0.591751
GO:0032024	3.66093	0.251955	17	1	Psmd9	positive regulation of insulin secretion	0.591751
GO:0032720	3.66093	0.251955	17	1	Gas6	negative regulation of tumor necrosis factor production	0.591751
GO:0032814	3.66093	0.251955	17	1	Gas6	regulation of natural killer cell activation	0.591751
GO:0033138	3.66093	0.251955	17	1	Gas6	positive regulation of peptidyl-serine phosphorylation	0.591751
GO:0035690	3.66093	0.251955	17	1	Gas6	cellular response to drug	0.591751
GO:0042551	3.66093	0.251955	17	1	Ednrb	neuron maturation	0.591751
GO:0045069	3.66093	0.251955	17	1	Rsad2	regulation of viral genome replication	0.591751
GO:0048525	3.66093	0.251955	17	1	Rsad2	negative regulation of viral reproduction	0.591751
GO:0048536	3.66093	0.251955	17	1	Slc40a1	spleen development	0.591751
GO:0090277	3.66093	0.251955	17	1	Psmd9	positive regulation of peptide hormone secretion	0.591751
GO:0007015	1.76846	0.252457	103	3	Twf1,Kank2,Rictor	actin filament organization	0.591751
GO:0051222	2.06225	0.263266	59	2	Rbm22,Gas6	positive regulation of protein transport	0.591751
GO:0002711	3.44474	0.264641	18	1	Rsad2	positive regulation of T cell mediated immunity	0.591751
GO:0006308	3.44474	0.264641	18	1	Apaf1	DNA catabolic process	0.591751
GO:0021988	3.44474	0.264641	18	1	Htt	olfactory lobe development	0.591751
GO:0031333	3.44474	0.264641	18	1	Twf1	negative regulation of protein complex assembly	0.591751
GO:0042092	3.44474	0.264641	18	1	Rsad2	type 2 immune response	0.591751
GO:0043154	3.44474	0.264641	18	1	Gas6	negative regulation of cysteine-type endopeptidase activity involved in apoptotic process	0.591751
GO:0048639	3.44474	0.264641	18	1	Ist1	positive regulation of developmental growth	0.591751
GO:0055013	3.44474	0.264641	18	1	Atg5	cardiac muscle cell development	0.591751
GO:2000117	3.44474	0.264641	18	1	Gas6	negative regulation of cysteine-type endopeptidase activity	0.591751
GO:0045927	1.99164	0.275878	61	2	Derl2,Ist1	positive regulation of growth	0.591751
GO:0001959	3.25285	0.277113	19	1	Gas6	regulation of cytokine-mediated signaling pathway	0.591751
GO:0007200	3.25285	0.277113	19	1	Gnb1	phospholipase C-activating G-protein coupled receptor signaling pathway	0.591751
GO:0030814	3.25285	0.277113	19	1	Timp2	regulation of cAMP metabolic process	0.591751
GO:0030901	3.25285	0.277113	19	1	Kat2a	midbrain development	0.591751
GO:0031018	3.25285	0.277113	19	1	Pdpk1	endocrine pancreas development	0.591751
GO:0035020	3.25285	0.277113	19	1	Rictor	regulation of Rac protein signal transduction	0.591751
GO:0042311	3.25285	0.277113	19	1	Atg5	vasodilation	0.591751
GO:0043244	3.25285	0.277113	19	1	Twf1	regulation of protein complex disassembly	0.591751
GO:0031396	1.9581	0.282181	62	2	Ubqln1,Atg5	regulation of protein ubiquitination	0.591751
GO:0031667	1.9581	0.282181	62	2	Gas6,Atg5	response to nutrient levels	0.591751
GO:0048469	1.9581	0.282181	62	2	Tusc2,Ednrb	cell maturation	0.591751
GO:0007005	1.83813	0.287877	133	4	Htt,Chchd6,Vat1,Tk2	mitochondrion organization	0.591751
GO:0001843	1.92566	0.288481	63	2	Apaf1,Kat2a	neural tube closure	0.591751
GO:0006473	1.92566	0.288481	63	2	Kat2a,Naa50	protein acetylation	0.591751
GO:0007498	1.92566	0.288481	63	2	Pofut2,Htt	mesoderm development	0.591751
GO:0009855	1.92566	0.288481	63	2	Kif3a,Setdb2	determination of bilateral symmetry	0.591751
GO:0031668	1.92566	0.288481	63	2	Gas6,Atg5	cellular response to extracellular stimulus	0.591751
GO:0046822	1.92566	0.288481	63	2	Fbxw11,Gas6	regulation of nucleocytoplasmic transport	0.591751
GO:0060606	1.92566	0.288481	63	2	Apaf1,Kat2a	tube closure	0.591751
GO:0007030	3.08116	0.289376	20	1	Nploc4	Golgi organization	0.591751
GO:0007157	3.08116	0.289376	20	1	Lgals9	heterophilic cell-cell adhesion	0.591751
GO:0021532	3.08116	0.289376	20	1	Kif3a	neural tube patterning	0.591751
GO:0031397	3.08116	0.289376	20	1	Atg5	negative regulation of protein ubiquitination	0.591751
GO:0032006	3.08116	0.289376	20	1	Gas6	regulation of TOR signaling cascade	0.591751
GO:0035162	3.08116	0.289376	20	1	Thoc5	embryonic hemopoiesis	0.591751
GO:0045576	3.08116	0.289376	20	1	Pdpk1	mast cell activation	0.591751
GO:0060324	3.08116	0.289376	20	1	Zfand5	face development	0.591751
GO:0061097	3.08116	0.289376	20	1	Gas6	regulation of protein tyrosine kinase activity	0.591751
GO:0071356	3.08116	0.289376	20	1	Gas6	cellular response to tumor necrosis factor	0.591751
GO:2000045	3.08116	0.289376	20	1	Kank2	regulation of G1/S transition of mitotic cell cycle	0.591751
GO:0016485	1.80925	0.291296	135	4	Apaf1,Fbxw11,Diablo,Lonp2	protein processing	0.591751
GO:0007179	1.89428	0.294775	64	2	Ltbp1,Htra1	transforming growth factor beta receptor signaling pathway	0.591751
GO:0015833	1.89428	0.294775	64	2	Htt,Psmd9	peptide transport	0.591751
GO:0034504	1.89428	0.294775	64	2	Fbxw11,Gas6	protein localization to nucleus	0.591751
GO:0048864	1.76785	0.296791	138	4	Pofut2,Ednrb,Nrp2,Med14	stem cell development	0.591751
GO:0051604	1.74121	0.300687	140	4	Apaf1,Fbxw11,Diablo,Lonp2	protein maturation	0.591751
GO:0006637	2.92665	0.301434	21	1	Pdk4	acyl-CoA metabolic process	0.591751
GO:0006888	2.92665	0.301434	21	1	Htt	ER to Golgi vesicle-mediated transport	0.591751
GO:0008033	2.92665	0.301434	21	1	Thg1l	tRNA processing	0.591751
GO:0008593	2.92665	0.301434	21	1	Aak1	regulation of Notch signaling pathway	0.591751
GO:0009062	2.92665	0.301434	21	1	Abcd2	fatty acid catabolic process	0.591751
GO:0030318	2.92665	0.301434	21	1	Ednrb	melanocyte differentiation	0.591751
GO:0030968	2.92665	0.301434	21	1	Derl2	endoplasmic reticulum unfolded protein response	0.591751
GO:0042308	2.92665	0.301434	21	1	Fbxw11	negative regulation of protein import into nucleus	0.591751
GO:0046058	2.92665	0.301434	21	1	Timp2	cAMP metabolic process	0.591751
GO:0048168	2.92665	0.301434	21	1	Kcnj10	regulation of neuronal synaptic plasticity	0.591751
GO:0048284	2.92665	0.301434	21	1	Vat1	organelle fusion	0.591751
GO:0050772	2.92665	0.301434	21	1	Ist1	positive regulation of axonogenesis	0.591751
GO:2000107	2.92665	0.301434	21	1	Gas6	negative regulation of leukocyte apoptotic process	0.591751
GO:0006913	1.72818	0.302703	141	4	Fbxw11,Htt,Gas6,Ipo11	nucleocytoplasmic transport	0.591751
GO:0071363	1.72818	0.302703	141	4	Raf1,Ltbp1,Htra1,Gas6	cellular response to growth factor stimulus	0.591751
GO:0002699	1.83449	0.30734	66	2	Rsad2,Pdpk1	positive regulation of immune effector process	0.591751
GO:0030100	1.83449	0.30734	66	2	Gas6,Aak1	regulation of endocytosis	0.591751
GO:0070848	1.69022	0.309006	144	4	Raf1,Ltbp1,Htra1,Gas6	response to growth factor stimulus	0.591751
GO:0001974	2.78685	0.313289	22	1	Atg5	blood vessel remodeling	0.591751
GO:0010332	2.78685	0.313289	22	1	Xrcc4	response to gamma radiation	0.591751
GO:0019395	2.78685	0.313289	22	1	Abcd2	fatty acid oxidation	0.591751
GO:0034620	2.78685	0.313289	22	1	Derl2	cellular response to unfolded protein	0.591751
GO:0046887	2.78685	0.313289	22	1	Psmd9	positive regulation of hormone secretion	0.591751
GO:0048483	2.78685	0.313289	22	1	Ednrb	autonomic nervous system development	0.591751
GO:0071333	2.78685	0.313289	22	1	Gas6	cellular response to glucose stimulus	0.591751
GO:0051258	1.80579	0.313608	67	2	Twf1,Rictor	protein polymerization	0.591751
GO:0007519	1.77817	0.319864	68	2	Usp19,Tsc22d3	skeletal muscle tissue development	0.591751
GO:0060538	1.77817	0.319864	68	2	Usp19,Tsc22d3	skeletal muscle organ development	0.591751
GO:0002204	2.6597	0.324945	23	1	Xrcc4	somatic recombination of immunoglobulin genes involved in immune response	0.591751
GO:0007601	2.6597	0.324945	23	1	Kcnj10	visual perception	0.591751
GO:0021955	2.6597	0.324945	23	1	Cdh11	central nervous system neuron axonogenesis	0.591751
GO:0031929	2.6597	0.324945	23	1	Gas6	TOR signaling cascade	0.591751
GO:0045055	2.6597	0.324945	23	1	Pdpk1	regulated secretory pathway	0.591751
GO:0045190	2.6597	0.324945	23	1	Xrcc4	isotype switching	0.591751
GO:0048008	2.6597	0.324945	23	1	Zfand5	platelet-derived growth factor receptor signaling pathway	0.591751
GO:0051897	2.6597	0.324945	23	1	Gas6	positive regulation of protein kinase B signaling cascade	0.591751
GO:0061383	2.6597	0.324945	23	1	Slc40a1	trabecula morphogenesis	0.591751
GO:0030162	1.60765	0.325099	151	4	Apaf1,Fbxw11,Diablo,Gas6	regulation of proteolysis	0.591751
GO:0046879	1.75133	0.326107	69	2	Htt,Psmd9	hormone secretion	0.591751
GO:0050730	1.75133	0.326107	69	2	Gas6,Rictor	regulation of peptidyl-tyrosine phosphorylation	0.591751
GO:0071560	1.72527	0.332336	70	2	Ltbp1,Htra1	cellular response to transforming growth factor beta stimulus	0.592429
GO:0007186	1.57462	0.332531	154	4	Ednrb,Tm2d1,Gnb1,Htt	G-protein coupled receptor signaling pathway	0.592429
GO:0051046	1.5639	0.335074	155	4	Rsad2,Pdpk1,Psmd9,Gas6	regulation of secretion	0.592429
GO:0003158	2.54372	0.336405	24	1	Slc40a1	endothelium development	0.592429
GO:0006611	2.54372	0.336405	24	1	Gas6	protein export from nucleus	0.592429
GO:0006612	2.54372	0.336405	24	1	Gas6	protein targeting to membrane	0.592429
GO:0006749	2.54372	0.336405	24	1	Hagh	glutathione metabolic process	0.592429
GO:0042990	2.54372	0.336405	24	1	Fbxw11	regulation of transcription factor import into nucleus	0.592429
GO:0043648	2.54372	0.336405	24	1	Htt	dicarboxylic acid metabolic process	0.592429
GO:0050953	2.54372	0.336405	24	1	Kcnj10	sensory perception of light stimulus	0.592429
GO:0010720	1.67537	0.344746	72	2	Xrcc4,Ist1	positive regulation of cell development	0.594728
GO:0045088	1.67537	0.344746	72	2	Rsad2,Pdpk1	regulation of innate immune response	0.594728
GO:0008589	2.43716	0.347672	25	1	Glis2	regulation of smoothened signaling pathway	0.594728
GO:0016236	2.43716	0.347672	25	1	Atg5	macroautophagy	0.594728
GO:0030838	2.43716	0.347672	25	1	Rictor	positive regulation of actin filament polymerization	0.594728
GO:0033135	2.43716	0.347672	25	1	Gas6	regulation of peptidyl-serine phosphorylation	0.594728
GO:0034612	2.43716	0.347672	25	1	Gas6	response to tumor necrosis factor	0.594728
GO:0051592	2.43716	0.347672	25	1	Htt	response to calcium ion	0.594728
GO:0060563	2.43716	0.347672	25	1	Ednrb	neuroepithelial cell differentiation	0.594728
GO:0071322	2.43716	0.347672	25	1	Gas6	cellular response to carbohydrate stimulus	0.594728
GO:0006479	1.65147	0.350925	73	2	Suv420h1,Setdb2	protein methylation	0.59523
GO:0009615	1.65147	0.350925	73	2	Rsad2,Oas3	response to virus	0.59523
GO:0048863	1.50247	0.350957	161	4	Pofut2,Ednrb,Nrp2,Med14	stem cell differentiation	0.59523
GO:0060537	1.48302	0.356471	163	4	Usp19,Zfand5,Tsc22d3,Atg5	muscle tissue development	0.596585
GO:0001678	2.33943	0.35875	26	1	Gas6	cellular glucose homeostasis	0.596585
GO:0003014	2.33943	0.35875	26	1	Gas6	renal system process	0.596585
GO:0006694	2.33943	0.35875	26	1	Hmgcr	steroid biosynthetic process	0.596585
GO:0045766	2.33943	0.35875	26	1	Rhob	positive regulation of angiogenesis	0.596585
GO:0050766	2.33943	0.35875	26	1	Gas6	positive regulation of phagocytosis	0.596585
GO:0090305	2.33943	0.35875	26	1	Apaf1	nucleic acid phosphodiester bond hydrolysis	0.596585
GO:0033365	1.46406	0.362084	165	4	Fbxw11,Htt,Gas6,Ipo11	protein localization to organelle	0.600457
GO:0003002	1.45475	0.364927	166	4	Kif3a,Kat2a,Htt,Setdb2	regionalization	0.602941
GO:0032147	1.58366	0.36934	76	2	Gas6,Traf7	activation of protein kinase activity	0.602941
GO:0043254	1.58366	0.36934	76	2	Twf1,Rictor	regulation of protein complex assembly	0.602941
GO:0002381	2.24905	0.369642	27	1	Xrcc4	immunoglobulin production involved in immunoglobulin mediated immune response	0.602941
GO:0006813	2.24905	0.369642	27	1	Kcnj10	potassium ion transport	0.602941
GO:0007528	2.24905	0.369642	27	1	Pdzrn3	neuromuscular junction development	0.602941
GO:0009991	1.56226	0.375435	77	2	Gas6,Atg5	response to extracellular stimulus	0.607138
GO:0007606	2.16547	0.380351	28	1	Gnb1	sensory perception of chemical stimulus	0.607138
GO:0008652	2.16547	0.380351	28	1	Hagh	cellular amino acid biosynthetic process	0.607138
GO:0010632	2.16547	0.380351	28	1	Pdpk1	regulation of epithelial cell migration	0.607138
GO:0030518	2.16547	0.380351	28	1	Kank2	intracellular steroid hormone receptor signaling pathway	0.607138
GO:0031532	2.16547	0.380351	28	1	Rictor	actin cytoskeleton reorganization	0.607138
GO:0043241	2.16547	0.380351	28	1	Twf1	protein complex disassembly	0.607138
GO:0048709	2.16547	0.380351	28	1	Kcnj10	oligodendrocyte differentiation	0.607138
GO:0001947	2.08775	0.39088	29	1	Setdb2	heart looping	0.611059
GO:0006576	2.08775	0.39088	29	1	Paox	cellular biogenic amine metabolic process	0.611059
GO:0006672	2.08775	0.39088	29	1	Samd8	ceramide metabolic process	0.611059
GO:0006984	2.08775	0.39088	29	1	Derl2	ER-nucleus signaling pathway	0.611059
GO:0007628	2.08775	0.39088	29	1	Kcnj10	adult walking behavior	0.611059
GO:0016447	2.08775	0.39088	29	1	Xrcc4	somatic recombination of immunoglobulin gene segments	0.611059
GO:0060322	2.08775	0.39088	29	1	Zfand5	head development	0.611059
GO:0001841	1.50135	0.393576	80	2	Apaf1,Kat2a	neural tube formation	0.611059
GO:0007611	1.48208	0.399572	81	2	Hmgcr,Htt	learning or memory	0.611059
GO:0000956	2.01551	0.401232	30	1	Ago1	nuclear-transcribed mRNA catabolic process	0.611059
GO:0006986	2.01551	0.401232	30	1	Derl2	response to unfolded protein	0.611059
GO:0007585	2.01551	0.401232	30	1	Zfand5	respiratory gaseous exchange	0.611059
GO:0030510	2.01551	0.401232	30	1	Htra1	regulation of BMP signaling pathway	0.611059
GO:0043367	2.01551	0.401232	30	1	Rsad2	CD4-positive, alpha-beta T cell differentiation	0.611059
GO:0045862	2.01551	0.401232	30	1	Fbxw11	positive regulation of proteolysis	0.611059
GO:0048066	2.01551	0.401232	30	1	Ednrb	developmental pigmentation	0.611059
GO:0050821	2.01551	0.401232	30	1	Aak1	protein stabilization	0.611059
GO:0061371	2.01551	0.401232	30	1	Setdb2	determination of heart left/right asymmetry	0.611059
GO:0007422	1.94791	0.411409	31	1	Ednrb	peripheral nervous system development	0.621801
GO:0035710	1.94791	0.411409	31	1	Rsad2	CD4-positive, alpha-beta T cell activation	0.621801
GO:0065004	1.94791	0.411409	31	1	Tcf4	protein-DNA complex assembly	0.621801
GO:0002456	1.88478	0.421416	32	1	Rsad2	T cell mediated immunity	0.627394
GO:0008088	1.88478	0.421416	32	1	Htt	axon cargo transport	0.627394
GO:0031016	1.88478	0.421416	32	1	Pdpk1	pancreas development	0.627394
GO:0043967	1.88478	0.421416	32	1	Kat2a	histone H4 acetylation	0.627394
GO:0051017	1.88478	0.421416	32	1	Kank2	actin filament bundle assembly	0.627394
GO:0090002	1.88478	0.421416	32	1	Gas6	establishment of protein localization to plasma membrane	0.627394
GO:0009952	1.71601	0.427466	106	3	Kif3a,Kat2a,Htt	anterior/posterior pattern specification	0.627948
GO:0016331	1.71601	0.427466	106	3	Apaf1,Kat2a,Htt	morphogenesis of embryonic epithelium	0.627948
GO:0021915	1.68271	0.431171	108	3	Kif3a,Apaf1,Kat2a	neural tube development	0.627948
GO:0017015	1.82563	0.431254	33	1	Htra1	regulation of transforming growth factor beta receptor signaling pathway	0.627948
GO:0032273	1.82563	0.431254	33	1	Rictor	positive regulation of protein polymerization	0.627948
GO:0045666	1.82563	0.431254	33	1	Tcf4	positive regulation of neuron differentiation	0.627948
GO:0050707	1.82563	0.431254	33	1	Gas6	regulation of cytokine secretion	0.627948
GO:0050764	1.82563	0.431254	33	1	Gas6	regulation of phagocytosis	0.627948
GO:0051145	1.82563	0.431254	33	1	Ednrb	smooth muscle cell differentiation	0.627948
GO:0003073	1.76991	0.440926	34	1	Gas6	regulation of systemic arterial blood pressure	0.63273
GO:0003143	1.76991	0.440926	34	1	Setdb2	embryonic heart tube morphogenesis	0.63273
GO:0009187	1.76991	0.440926	34	1	Timp2	cyclic nucleotide metabolic process	0.63273
GO:0016444	1.76991	0.440926	34	1	Xrcc4	somatic cell DNA recombination	0.63273
GO:0032649	1.76991	0.440926	34	1	Gas6	regulation of interferon-gamma production	0.63273
GO:0046890	1.76991	0.440926	34	1	Samd8	regulation of lipid biosynthetic process	0.63273
GO:0002443	1.57552	0.445794	115	3	Rsad2,Xrcc4,Pdpk1	leukocyte mediated immunity	0.63273
GO:0060627	1.54731	0.450395	117	3	Pdpk1,Gas6,Aak1	regulation of vesicle-mediated transport	0.63273
GO:0007623	1.71755	0.450436	35	1	Fbxw11	circadian rhythm	0.63273
GO:0010954	1.71755	0.450436	35	1	Fbxw11	positive regulation of protein processing	0.63273
GO:0021782	1.71755	0.450436	35	1	Kcnj10	glial cell development	0.63273
GO:0043484	1.71755	0.450436	35	1	Rbm22	regulation of RNA splicing	0.63273
GO:0045638	1.71755	0.450436	35	1	Thoc5	negative regulation of myeloid cell differentiation	0.63273
GO:0050796	1.71755	0.450436	35	1	Psmd9	regulation of insulin secretion	0.63273
GO:0055007	1.71755	0.450436	35	1	Atg5	cardiac muscle cell differentiation	0.63273
GO:0016071	1.5068	0.457607	120	3	Rbm22,Ago3,Ago1	mRNA metabolic process	0.638354
GO:0002821	1.66818	0.459786	36	1	Rsad2	positive regulation of adaptive immune response	0.638354
GO:0006839	1.66818	0.459786	36	1	Htt	mitochondrial transport	0.638354
GO:0009749	1.66818	0.459786	36	1	Gas6	response to glucose stimulus	0.638354
GO:0043542	1.66818	0.459786	36	1	Pdpk1	endothelial cell migration	0.638354
GO:0010256	1.46833	0.465157	123	3	Htt,Gas6,Nploc4	endomembrane system organization	0.639855
GO:0008015	1.45593	0.467743	124	3	Ednrb,Gas6,Atg5	blood circulation	0.639855
GO:0002761	1.62156	0.468978	37	1	Thoc5	regulation of myeloid leukocyte differentiation	0.639855
GO:0009308	1.62156	0.468978	37	1	Paox	amine metabolic process	0.639855
GO:0010951	1.62156	0.468978	37	1	Gas6	negative regulation of endopeptidase activity	0.639855
GO:0043112	1.62156	0.468978	37	1	Fnta	receptor metabolic process	0.639855
GO:0051297	1.62156	0.468978	37	1	Crocc	centrosome organization	0.639855
GO:0043623	1.44373	0.470362	125	3	Twf1,Psmd9,Rictor	cellular protein complex assembly	0.639855
GO:0051493	1.43173	0.473012	126	3	Twf1,Kank2,Rictor	regulation of cytoskeleton organization	0.639855
GO:0001756	1.57745	0.478016	38	1	Kat2a	somitogenesis	0.639855
GO:0001837	1.57745	0.478016	38	1	Pofut2	epithelial to mesenchymal transition	0.639855
GO:0006261	1.57745	0.478016	38	1	Tk2	DNA-dependent DNA replication	0.639855
GO:0008037	1.57745	0.478016	38	1	Colec12	cell recognition	0.639855
GO:0008203	1.57745	0.478016	38	1	Hmgcr	cholesterol metabolic process	0.639855
GO:0032675	1.57745	0.478016	38	1	Gas6	regulation of interleukin-6 production	0.639855
GO:0043407	1.57745	0.478016	38	1	Hmgcr	negative regulation of MAP kinase activity	0.639855
GO:0006898	1.53566	0.486901	39	1	Aak1	receptor-mediated endocytosis	0.640465
GO:0031023	1.53566	0.486901	39	1	Crocc	microtubule organizing center organization	0.640465
GO:0032680	1.53566	0.486901	39	1	Gas6	regulation of tumor necrosis factor production	0.640465
GO:0035150	1.53566	0.486901	39	1	Atg5	regulation of tube size	0.640465
GO:0050880	1.53566	0.486901	39	1	Atg5	regulation of blood vessel size	0.640465
GO:0090276	1.53566	0.486901	39	1	Psmd9	regulation of peptide hormone secretion	0.640465
GO:0042391	1.35291	0.492342	133	3	Htt,Kcnj10,Kcnd2	regulation of membrane potential	0.640465
GO:0007569	1.49602	0.495636	40	1	Htt	cell aging	0.640465
GO:0010466	1.49602	0.495636	40	1	Gas6	negative regulation of peptidase activity	0.640465
GO:0016125	1.49602	0.495636	40	1	Hmgcr	sterol metabolic process	0.640465
GO:0016579	1.49602	0.495636	40	1	Usp19	protein deubiquitination	0.640465
GO:0021954	1.49602	0.495636	40	1	Cdh11	central nervous system neuron development	0.640465
GO:0030258	1.49602	0.495636	40	1	Abcd2	lipid modification	0.640465
GO:0044242	1.49602	0.495636	40	1	Abcd2	cellular lipid catabolic process	0.640465
GO:0045185	1.49602	0.495636	40	1	Twf1	maintenance of protein location	0.640465
GO:0048588	1.49602	0.495636	40	1	Ist1	developmental cell growth	0.640465
GO:0032787	1.32168	0.500983	136	3	Pdk4,Htt,Abcd2	monocarboxylic acid metabolic process	0.64321
GO:0002244	1.45836	0.504225	41	1	Xrcc4	hematopoietic progenitor cell differentiation	0.64321
GO:0006338	1.45836	0.504225	41	1	Ttf1	chromatin remodeling	0.64321
GO:0006665	1.45836	0.504225	41	1	Samd8	sphingolipid metabolic process	0.64321
GO:0009743	1.45836	0.504225	41	1	Gas6	response to carbohydrate stimulus	0.64321
GO:0051168	1.45836	0.504225	41	1	Gas6	nuclear export	0.64321
GO:0002260	1.42254	0.512668	42	1	Slc40a1	lymphocyte homeostasis	0.647068
GO:0006836	1.42254	0.512668	42	1	Kcnj10	neurotransmitter transport	0.647068
GO:0045807	1.42254	0.512668	42	1	Gas6	positive regulation of endocytosis	0.647068
GO:0051495	1.42254	0.512668	42	1	Rictor	positive regulation of cytoskeleton organization	0.647068
GO:0061053	1.42254	0.512668	42	1	Kat2a	somite development	0.647068
GO:0008286	1.38843	0.52097	43	1	Smarcc1	insulin receptor signaling pathway	0.650667
GO:0032609	1.38843	0.52097	43	1	Gas6	interferon-gamma production	0.650667
GO:0035050	1.38843	0.52097	43	1	Setdb2	embryonic heart tube development	0.650667
GO:0050663	1.38843	0.52097	43	1	Gas6	cytokine secretion	0.650667
GO:0072659	1.38843	0.52097	43	1	Gas6	protein localization to plasma membrane	0.650667
GO:0006323	1.35592	0.529131	44	1	Smarcc1	DNA packaging	0.654452
GO:0051607	1.35592	0.529131	44	1	Rsad2	defense response to virus	0.654452
GO:0070646	1.35592	0.529131	44	1	Usp19	protein modification by small protein removal	0.654452
GO:0090068	1.35592	0.529131	44	1	Usp19	positive regulation of cell cycle process	0.654452
GO:0045664	1.42751	0.534283	169	4	Timp2,Ednrb,Ist1,Tcf4	regulation of neuron differentiation	0.654452
GO:0001818	1.32487	0.537155	45	1	Gas6	negative regulation of cytokine production	0.654452
GO:0006518	1.32487	0.537155	45	1	Hagh	peptide metabolic process	0.654452
GO:0007033	1.32487	0.537155	45	1	Atg5	vacuole organization	0.654452
GO:0008361	1.32487	0.537155	45	1	Ist1	regulation of cell size	0.654452
GO:0009798	1.32487	0.537155	45	1	Setdb2	axis specification	0.654452
GO:0045621	1.32487	0.537155	45	1	Gas6	positive regulation of lymphocyte differentiation	0.654452
GO:0048565	1.32487	0.537155	45	1	Ednrb	digestive tract development	0.654452
GO:0030098	1.36765	0.542635	176	4	Tusc2,Rsad2,Xrcc4,Gas6	lymphocyte differentiation	0.657355
GO:0006914	1.2952	0.545043	46	1	Atg5	autophagy	0.657355
GO:0007219	1.2952	0.545043	46	1	Aak1	Notch signaling pathway	0.657355
GO:0042035	1.2952	0.545043	46	1	Tia1	regulation of cytokine biosynthetic process	0.657355
GO:0046883	1.2952	0.545043	46	1	Psmd9	regulation of hormone secretion	0.657355
GO:0001505	1.26682	0.552799	47	1	Kcnj10	regulation of neurotransmitter levels	0.661364
GO:0016064	1.26682	0.552799	47	1	Xrcc4	immunoglobulin mediated immune response	0.661364
GO:0031334	1.26682	0.552799	47	1	Rictor	positive regulation of protein complex assembly	0.661364
GO:0032319	1.26682	0.552799	47	1	Rictor	regulation of Rho GTPase activity	0.661364
GO:0061024	1.29748	0.555573	185	4	Htt,Chchd6,Gas6,Vat1	membrane organization	0.663354
GO:0000398	1.23965	0.560423	48	1	Rbm22	mRNA splicing, via spliceosome	0.663835
GO:0017157	1.23965	0.560423	48	1	Pdpk1	regulation of exocytosis	0.663835
GO:0030509	1.23965	0.560423	48	1	Htra1	BMP signaling pathway	0.663835
GO:0031214	1.23965	0.560423	48	1	Gas6	biomineral tissue development	0.663835
GO:0002377	1.2136	0.567919	49	1	Xrcc4	immunoglobulin production	0.664308
GO:0009953	1.2136	0.567919	49	1	Kif3a	dorsal/ventral pattern formation	0.664308
GO:0019724	1.2136	0.567919	49	1	Xrcc4	B cell mediated immunity	0.664308
GO:0030705	1.2136	0.567919	49	1	Htt	cytoskeleton-dependent intracellular transport	0.664308
GO:0043473	1.2136	0.567919	49	1	Ednrb	pigmentation	0.664308
GO:0046632	1.2136	0.567919	49	1	Rsad2	alpha-beta T cell differentiation	0.664308
GO:0000082	1.18863	0.575289	50	1	Kank2	G1/S transition of mitotic cell cycle	0.664308
GO:0000375	1.18863	0.575289	50	1	Rbm22	RNA splicing, via transesterification reactions	0.664308
GO:0030010	1.18863	0.575289	50	1	Frmd4b	establishment of cell polarity	0.664308
GO:0030595	1.18863	0.575289	50	1	Gas6	leukocyte chemotaxis	0.664308
GO:0035282	1.18863	0.575289	50	1	Kat2a	segmentation	0.664308
GO:0071222	1.18863	0.575289	50	1	Cmpk2	cellular response to lipopolysaccharide	0.664308
GO:0071901	1.18863	0.575289	50	1	Hmgcr	negative regulation of protein serine/threonine kinase activity	0.664308
GO:0007169	1.2012	0.579627	199	4	Raf1,Zfand5,Gfra4,Smarcc1	transmembrane receptor protein tyrosine kinase signaling pathway	0.668026
GO:0016042	1.16465	0.582534	51	1	Abcd2	lipid catabolic process	0.668793
GO:0035270	1.16465	0.582534	51	1	Pdpk1	endocrine system development	0.668793
GO:0007596	1.14161	0.589656	52	1	Gas6	blood coagulation	0.672243
GO:0055123	1.14161	0.589656	52	1	Ednrb	digestive system development	0.672243
GO:0007599	1.11945	0.596659	53	1	Gas6	hemostasis	0.672243
GO:0010631	1.11945	0.596659	53	1	Pdpk1	epithelial cell migration	0.672243
GO:0016573	1.11945	0.596659	53	1	Kat2a	histone acetylation	0.672243
GO:0018393	1.11945	0.596659	53	1	Kat2a	internal peptidyl-lysine acetylation	0.672243
GO:0033077	1.11945	0.596659	53	1	Xrcc4	T cell differentiation in thymus	0.672243
GO:0050770	1.11945	0.596659	53	1	Ist1	regulation of axonogenesis	0.672243
GO:0001776	1.09813	0.603543	54	1	Slc40a1	leukocyte homeostasis	0.672243
GO:0006486	1.09813	0.603543	54	1	Pofut2	protein glycosylation	0.672243
GO:0022037	1.09813	0.603543	54	1	Kat2a	metencephalon development	0.672243
GO:0035051	1.09813	0.603543	54	1	Atg5	cardiocyte differentiation	0.672243
GO:0042445	1.09813	0.603543	54	1	Htt	hormone metabolic process	0.672243
GO:0042593	1.09813	0.603543	54	1	Gas6	glucose homeostasis	0.672243
GO:0048193	1.09813	0.603543	54	1	Htt	Golgi vesicle transport	0.672243
GO:0042089	1.07759	0.610311	55	1	Tia1	cytokine biosynthetic process	0.672243
GO:0042107	1.07759	0.610311	55	1	Tia1	cytokine metabolic process	0.672243
GO:0042552	1.07759	0.610311	55	1	Kcnj10	myelination	0.672243
GO:0043409	1.07759	0.610311	55	1	Hmgcr	negative regulation of MAPK cascade	0.672243
GO:0048638	1.07759	0.610311	55	1	Ist1	regulation of developmental growth	0.672243
GO:0071219	1.07759	0.610311	55	1	Cmpk2	cellular response to molecule of bacterial origin	0.672243
GO:0072593	1.07759	0.610311	55	1	Gpx3	reactive oxygen species metabolic process	0.672243
GO:0006475	1.05786	0.616964	56	1	Kat2a	internal protein amino acid acetylation	0.67336
GO:0006643	1.05786	0.616964	56	1	Samd8	membrane lipid metabolic process	0.67336
GO:0018394	1.05786	0.616964	56	1	Kat2a	peptidyl-lysine acetylation	0.67336
GO:0045765	1.05786	0.616964	56	1	Rhob	regulation of angiogenesis	0.67336
GO:0051260	1.05786	0.616964	56	1	Gpx3	protein homooligomerization	0.67336
GO:0008366	1.03876	0.623506	57	1	Kcnj10	axon ensheathment	0.676787
GO:0031346	1.03876	0.623506	57	1	Ist1	positive regulation of cell projection organization	0.676787
GO:0070085	1.03876	0.623506	57	1	Pofut2	glycosylation	0.676787
GO:0050890	1.44497	0.651799	83	2	Hmgcr,Htt	cognition	0.704317
GO:0019221	1.42709	0.653588	84	2	Il21r,Gas6	cytokine-mediated signaling pathway	0.704317
GO:0050804	1.42709	0.653588	84	2	Htt,Kcnj10	regulation of synaptic transmission	0.704317
GO:0051259	1.42709	0.653588	84	2	Gpx3,Cbr2	protein oligomerization	0.704317
GO:0007369	1.40964	0.655417	85	2	Pofut2,Htt	gastrulation	0.704487
GO:0002366	1.39261	0.657285	86	2	Xrcc4,Pdpk1	leukocyte activation involved in immune response	0.704487
GO:0040029	1.39261	0.657285	86	2	Ago3,Ago1	regulation of gene expression, epigenetic	0.704487
GO:0001838	1.34388	0.663104	89	2	Apaf1,Kat2a	embryonic epithelial tube formation	0.708181
GO:0010769	1.34388	0.663104	89	2	Pofut2,Ist1	regulation of cell morphogenesis involved in differentiation	0.708181
GO:0072175	1.32837	0.66511	90	2	Apaf1,Kat2a	epithelial tube formation	0.709054
GO:0001558	1.26969	0.673418	94	2	Derl2,Ist1	regulation of cell growth	0.713821
GO:0006790	1.25581	0.67556	95	2	Pdk4,Hagh	sulfur compound metabolic process	0.713821
GO:0006887	1.25581	0.67556	95	2	Scamp1,Pdpk1	exocytosis	0.713821
GO:0015711	1.25581	0.67556	95	2	Htt,Kcnj10	organic anion transport	0.713821
GO:0035148	1.25581	0.67556	95	2	Apaf1,Kat2a	tube formation	0.713821
GO:0007346	1.24222	0.677723	96	2	Dynlt3,Kank2	regulation of mitotic cell cycle	0.714842
GO:0048839	1.22892	0.679909	97	2	Igfbp7,Atg5	inner ear development	0.715882
GO:0002764	1.2159	0.682114	98	2	Rsad2,Pdpk1	immune response-regulating signaling pathway	0.716753
GO:0021537	1.20315	0.684337	99	2	Kat2a,Htt	telencephalon development	0.716753
GO:0046777	1.20315	0.684337	99	2	Dapk3,Aak1	protein autophosphorylation	0.716753
GO:0032259	1.17841	0.688836	101	2	Suv420h1,Setdb2	methylation	0.720202
GO:0002253	1.14313	0.695694	104	2	Rsad2,Pdpk1	activation of immune response	0.724833
GO:0002460	1.14313	0.695694	104	2	Rsad2,Xrcc4	adaptive immune response based on somatic recombination of immune receptors built from immunoglobulin superfamily domains	0.724833
GO:0007626	1.13182	0.698004	105	2	Htt,Kcnj10	locomotory behavior	0.725973
GO:0018108	1.10986	0.702656	107	2	Gas6,Rictor	peptidyl-tyrosine phosphorylation	0.72954
GO:0043583	1.08871	0.707342	109	2	Igfbp7,Atg5	ear development	0.733131
GO:0006875	1.07842	0.709696	110	2	Micu1,Mon1a	cellular metal ion homeostasis	0.734192
GO:0006820	1.06832	0.712055	111	2	Htt,Kcnj10	anion transport	0.734192
GO:0055114	1.06832	0.712055	111	2	Cbr2,Abcd2	oxidation-reduction process	0.734192
GO:0002250	1.04874	0.716788	113	2	Rsad2,Xrcc4	adaptive immune response	0.735262
GO:0010564	1.04874	0.716788	113	2	Usp19,Kank2	regulation of cell cycle process	0.735262
GO:0045087	1.04874	0.716788	113	2	Rsad2,Pdpk1	innate immune response	0.735262
GO:0006520	1.03918	0.719159	114	2	Hagh,Htt	cellular amino acid metabolic process	0.736429
GO:0055082	1.22699	0.737846	146	3	Micu1,Gas6,Mon1a	cellular chemical homeostasis	0.754271
GO:0006897	1.19273	0.741577	150	3	Gas6,Colec12,Aak1	endocytosis	0.756788
GO:0014706	1.1295	0.749975	158	3	Usp19,Tsc22d3,Atg5	striated muscle tissue development	0.764053
GO:0030900	1.0657	0.760633	167	3	Apaf1,Kat2a,Htt	forebrain development	0.773506
GO:0016570	1.05911	0.761881	168	3	Kat2a,Suv420h1,Setdb2	histone modification	0.773506
GO:0019725	1.05253	0.763141	169	3	Micu1,Gas6,Mon1a	cellular homeostasis	0.773506
GO:0007568	1.02034	1	58	1	Htt	aging	1
GO:0008344	1.02034	1	58	1	Kcnj10	adult locomotory behavior	1
GO:0018105	1.02034	1	58	1	Gas6	peptidyl-serine phosphorylation	1
GO:0030522	1.02034	1	58	1	Kank2	intracellular receptor mediated signaling pathway	1
GO:0035023	1.02034	1	58	1	Rictor	regulation of Rho protein signal transduction	1
GO:0060047	1.00257	1	59	1	Atg5	heart contraction	1
GO:0060326	1.00257	1	59	1	Gas6	cell chemotaxis	1
GO:0070613	1.00257	1	59	1	Fbxw11	regulation of protein processing	1

## Sheet: component 7 negative
	odds.ratio	p.value	n.categoy	n.category.and.component	genes	description	FDR
GO:0043086	4.57214	0.00351917	192	6	Apoa2,Nr4a1,Il1b,Dusp9,Lats1,Ppp1r37	negative regulation of catalytic activity	0.384905
GO:0010829	26.3876	0.00376331	12	2	Rhoq,Il1b	negative regulation of glucose transport	0.384905
GO:0008045	20.3159	0.00589848	15	2	Lhx9,Chn1	motor neuron axon guidance	0.384905
GO:0008585	8.59505	0.00679545	50	3	Lhx9,Pcyt1b,Nrip1	female gonad development	0.384905
GO:0071901	8.59505	0.00679545	50	3	Il1b,Dusp9,Lats1	negative regulation of protein serine/threonine kinase activity	0.384905
GO:0001525	4.60228	0.00701299	156	5	Tbx4,Ptprb,Il1b,Anxa2,Gpx1	angiogenesis	0.384905
GO:0001659	17.6005	0.00756446	17	2	Il1b,Gpx1	temperature homeostasis	0.384905
GO:0021772	17.6005	0.00756446	17	2	Rac1,Ski	olfactory bulb development	0.384905
GO:0046545	8.24233	0.00757949	52	3	Lhx9,Pcyt1b,Nrip1	development of primary female sexual characteristics	0.384905
GO:0006869	7.9167	0.00841506	54	3	Apoa2,Anxa1,Il1b	lipid transport	0.384905
GO:0021988	16.5054	0.00846792	18	2	Rac1,Ski	olfactory lobe development	0.384905
GO:0015908	15.5346	0.00941734	19	2	Anxa1,Il1b	fatty acid transport	0.392389
GO:0007519	6.19733	0.0157616	68	3	Col19a1,Ski,Gpx1	skeletal muscle tissue development	0.407935
GO:0060538	6.19733	0.0157616	68	3	Col19a1,Ski,Gpx1	skeletal muscle organ development	0.407935
GO:0042326	4.39353	0.0172643	128	4	Atxn7,Il1b,Dusp9,Lats1	negative regulation of phosphorylation	0.407935
GO:0048741	10.5537	0.0185805	27	2	Ski,Gpx1	skeletal muscle fiber development	0.407935
GO:0010827	10.1477	0.0199112	28	2	Rhoq,Il1b	regulation of glucose transport	0.407935
GO:0014904	10.1477	0.0199112	28	2	Ski,Gpx1	myotube cell development	0.407935
GO:0042108	9.09498	0.0241345	31	2	Apoa2,Il1b	positive regulation of cytokine biosynthetic process	0.407935
GO:0006469	5.22169	0.0242199	80	3	Il1b,Dusp9,Lats1	negative regulation of protein kinase activity	0.407935
GO:0016311	3.88043	0.0254085	144	4	Ptprb,Dusp9,Ppp1r37,Fbp1	dephosphorylation	0.407935
GO:0033673	5.0224	0.0266517	83	3	Il1b,Dusp9,Lats1	negative regulation of kinase activity	0.407935
GO:0045834	8.50546	0.0271358	33	2	Rac1,Il1b	positive regulation of lipid metabolic process	0.407935
GO:0051348	4.83853	0.0292104	86	3	Il1b,Dusp9,Lats1	negative regulation of transferase activity	0.407935
GO:0006917	4.66778	0.0318957	89	3	Itm2b,Nr4a1,Gpx1	induction of apoptosis	0.407935
GO:0008406	4.66778	0.0318957	89	3	Lhx9,Pcyt1b,Nrip1	gonad development	0.407935
GO:0030833	7.75207	0.031904	36	2	Rac1,Lats1	regulation of actin filament polymerization	0.407935
GO:0048747	7.52969	0.0335618	37	2	Ski,Gpx1	muscle fiber development	0.407935
GO:0007411	4.55982	0.0337559	91	3	Rac1,Lhx9,Chn1	axon guidance	0.407935
GO:0043407	7.31978	0.0352529	38	2	Il1b,Dusp9	negative regulation of MAP kinase activity	0.407935
GO:0022602	7.12134	0.0369767	39	2	Pcyt1b,Nrip1	ovulation cycle process	0.407935
GO:0051346	4.31075	0.0386502	96	3	Apoa2,Nr4a1,Ppp1r37	negative regulation of hydrolase activity	0.407935
GO:0009266	6.75244	0.0405197	41	2	Stac,Acot11	response to temperature stimulus	0.407935
GO:0042698	6.75244	0.0405197	41	2	Pcyt1b,Nrip1	ovulation cycle	0.407935
GO:0015758	6.58317	0.0423378	42	2	Rhoq,Il1b	glucose transport	0.407935
GO:0030041	6.58317	0.0423378	42	2	Rac1,Lats1	actin filament polymerization	0.407935
GO:0006935	3.25719	0.0429381	170	4	Rac1,Lhx9,Il1b,Chn1	chemotaxis	0.407935
GO:0032269	3.2371	0.0437213	171	4	Il1b,Ski,Dusp9,Lats1	negative regulation of cellular protein metabolic process	0.407935
GO:0008064	6.42159	0.0441863	43	2	Rac1,Lats1	regulation of actin polymerization or depolymerization	0.407935
GO:0030832	6.2677	0.0460645	44	2	Rac1,Lats1	regulation of actin filament length	0.407935
GO:0032870	4.00412	0.0460797	103	3	Rhoq,Il1b,Lats1	cellular response to hormone stimulus	0.407935
GO:0051051	3.92425	0.0483244	105	3	Rhoq,Il1b,Dact3	negative regulation of transport	0.407935
GO:0051146	3.92425	0.0483244	105	3	Spag9,Ski,Gpx1	striated muscle cell differentiation	0.407935
GO:0008643	5.98092	0.049908	46	2	Rhoq,Il1b	carbohydrate transport	0.407935
GO:0042035	5.98092	0.049908	46	2	Apoa2,Il1b	regulation of cytokine biosynthetic process	0.407935
GO:0001933	3.84748	0.0506225	107	3	Il1b,Dusp9,Lats1	negative regulation of protein phosphorylation	0.407935
GO:0009636	5.71906	0.0538639	48	2	Gpx1,Scn9a	response to toxin	0.407935
GO:0007548	3.70254	0.0553774	111	3	Lhx9,Pcyt1b,Nrip1	sex differentiation	0.407935
GO:0014902	5.59649	0.0558827	49	2	Ski,Gpx1	myotube differentiation	0.407935
GO:0043405	3.47258	0.0641968	118	3	Spag9,Il1b,Dusp9	regulation of MAP kinase activity	0.407935
GO:0008154	4.95775	0.0685343	55	2	Rac1,Lats1	actin polymerization or depolymerization	0.407935
GO:0042089	4.95775	0.0685343	55	2	Apoa2,Il1b	cytokine biosynthetic process	0.407935
GO:0042107	4.95775	0.0685343	55	2	Apoa2,Il1b	cytokine metabolic process	0.407935
GO:0043409	4.95775	0.0685343	55	2	Il1b,Dusp9	negative regulation of MAPK cascade	0.407935
GO:0051260	4.86532	0.0707281	56	2	Spag9,Aldoa	protein homooligomerization	0.407935
GO:0009913	4.77614	0.0729449	57	2	Rac1,Lats1	epidermal cell differentiation	0.407935
GO:0010212	4.77614	0.0729449	57	2	Dclre1c,Gpx1	response to ionizing radiation	0.407935
GO:0002675	14.3556	0.0756618	10	1	Il1b	positive regulation of acute inflammatory response	0.407935
GO:0022011	14.3556	0.0756618	10	1	Ski	myelination in peripheral nervous system	0.407935
GO:0030866	14.3556	0.0756618	10	1	Rhoq	cortical actin cytoskeleton organization	0.407935
GO:0031063	14.3556	0.0756618	10	1	Ski	regulation of histone deacetylation	0.407935
GO:0031649	14.3556	0.0756618	10	1	Il1b	heat generation	0.407935
GO:0033198	14.3556	0.0756618	10	1	Il1b	response to ATP	0.407935
GO:0042832	14.3556	0.0756618	10	1	Il12a	defense response to protozoan	0.407935
GO:0060117	14.3556	0.0756618	10	1	Rac1	auditory receptor cell development	0.407935
GO:0070301	14.3556	0.0756618	10	1	Gpx1	cellular response to hydrogen peroxide	0.407935
GO:0090003	14.3556	0.0756618	10	1	Rhoq	regulation of establishment of protein localization to plasma membrane	0.407935
GO:0055002	4.52716	0.0797286	60	2	Ski,Gpx1	striated muscle cell development	0.407935
GO:0009755	12.917	0.0829128	11	1	Lats1	hormone-mediated signaling pathway	0.407935
GO:0015909	12.917	0.0829128	11	1	Anxa1	long-chain fatty acid transport	0.407935
GO:0021799	12.917	0.0829128	11	1	Rac1	cerebral cortex radially oriented cell migration	0.407935
GO:0021884	12.917	0.0829128	11	1	Rac1	forebrain neuron development	0.407935
GO:0032374	12.917	0.0829128	11	1	Apoa2	regulation of cholesterol transport	0.407935
GO:0035329	12.917	0.0829128	11	1	Lats1	hippo signaling cascade	0.407935
GO:0046627	12.917	0.0829128	11	1	Il1b	negative regulation of insulin receptor signaling pathway	0.407935
GO:0050994	12.917	0.0829128	11	1	Il1b	regulation of lipid catabolic process	0.407935
GO:0007517	3.08793	0.0836522	132	3	Col19a1,Ski,Gpx1	muscle organ development	0.407935
GO:0032869	4.37454	0.0843577	62	2	Rhoq,Il1b	cellular response to insulin stimulus	0.407935
GO:0043281	4.37454	0.0843577	62	2	Tnfrsf10b,Nr4a1	regulation of cysteine-type endopeptidase activity involved in apoptotic process	0.407935
GO:0009725	3.01613	0.0881205	135	3	Rhoq,Il1b,Lats1	response to hormone stimulus	0.407935
GO:0097193	4.23192	0.0890677	64	2	Tnfrsf10b,Gpx1	intrinsic apoptotic signaling pathway	0.407935
GO:0001885	11.7427	0.0901082	12	1	Gpx1	endothelial cell development	0.407935
GO:0009410	11.7427	0.0901082	12	1	Gpx1	response to xenobiotic stimulus	0.407935
GO:0014044	11.7427	0.0901082	12	1	Ski	Schwann cell development	0.407935
GO:0030865	11.7427	0.0901082	12	1	Rhoq	cortical cytoskeleton organization	0.407935
GO:0032091	11.7427	0.0901082	12	1	Spag9	negative regulation of protein binding	0.407935
GO:0035176	11.7427	0.0901082	12	1	Npas3	social behavior	0.407935
GO:0042743	11.7427	0.0901082	12	1	Gpx1	hydrogen peroxide metabolic process	0.407935
GO:0030326	4.03457	0.096277	67	2	Tbx4,Ski	embryonic limb morphogenesis	0.407935
GO:0051258	4.03457	0.096277	67	2	Rac1,Lats1	protein polymerization	0.407935
GO:0001562	10.7606	0.0972484	13	1	Il12a	response to protozoan	0.407935
GO:0009409	10.7606	0.0972484	13	1	Acot11	response to cold	0.407935
GO:0030728	10.7606	0.0972484	13	1	Nrip1	ovulation	0.407935
GO:0031529	10.7606	0.0972484	13	1	Rac1	ruffle organization	0.407935
GO:0032314	10.7606	0.0972484	13	1	Chn1	regulation of Rac GTPase activity	0.407935
GO:0032370	10.7606	0.0972484	13	1	Il1b	positive regulation of lipid transport	0.407935
GO:0034605	10.7606	0.0972484	13	1	Stac	cellular response to heat	0.407935
GO:0043552	10.7606	0.0972484	13	1	Rac1	positive regulation of phosphatidylinositol 3-kinase activity	0.407935
GO:0051702	10.7606	0.0972484	13	1	Gpx1	interaction with symbiont	0.407935
GO:0090103	10.7606	0.0972484	13	1	Rac1	cochlea morphogenesis	0.407935
GO:0046328	3.97276	0.0987169	68	2	Spag9,Il1b	regulation of JNK cascade	0.407935
GO:0006911	9.9352	0.104334	14	1	Rac1	phagocytosis, engulfment	0.407935
GO:0046888	9.9352	0.104334	14	1	Il1b	negative regulation of hormone secretion	0.407935
GO:0048147	9.9352	0.104334	14	1	Ski	negative regulation of fibroblast proliferation	0.407935
GO:0060713	9.9352	0.104334	14	1	Esx1	labyrinthine layer morphogenesis	0.407935
GO:0032868	3.7433	0.108649	72	2	Rhoq,Il1b	response to insulin stimulus	0.407935
GO:0055001	3.7433	0.108649	72	2	Ski,Gpx1	muscle cell development	0.407935
GO:0007257	9.22541	0.111365	15	1	Spag9	activation of JUN kinase activity	0.407935
GO:0010324	9.22541	0.111365	15	1	Rac1	membrane invagination	0.407935
GO:0043277	9.22541	0.111365	15	1	Rac1	apoptotic cell clearance	0.407935
GO:0043534	9.22541	0.111365	15	1	Gpx1	blood vessel endothelial cell migration	0.407935
GO:0044070	9.22541	0.111365	15	1	Il1b	regulation of anion transport	0.407935
GO:0048265	9.22541	0.111365	15	1	Scn9a	response to pain	0.407935
GO:0051289	9.22541	0.111365	15	1	Aldoa	protein homotetramerization	0.407935
GO:0070059	9.22541	0.111365	15	1	Tnfrsf10b	intrinsic apoptotic signaling pathway in response to endoplasmic reticulum stress	0.407935
GO:0090311	9.22541	0.111365	15	1	Ski	regulation of protein deacetylation	0.407935
GO:0002064	3.63823	0.113713	74	2	Rac1,Gpx1	epithelial cell development	0.407935
GO:0032956	3.63823	0.113713	74	2	Rac1,Lats1	regulation of actin cytoskeleton organization	0.407935
GO:0000188	8.60731	0.118342	16	1	Dusp9	inactivation of MAPK activity	0.407935
GO:0006970	8.60731	0.118342	16	1	Rac1	response to osmotic stress	0.407935
GO:0030279	8.60731	0.118342	16	1	Nfe2	negative regulation of ossification	0.407935
GO:0030514	8.60731	0.118342	16	1	Ski	negative regulation of BMP signaling pathway	0.407935
GO:0033032	8.60731	0.118342	16	1	Anxa1	regulation of myeloid cell apoptotic process	0.407935
GO:0043550	8.60731	0.118342	16	1	Rac1	regulation of lipid kinase activity	0.407935
GO:0046626	8.60731	0.118342	16	1	Il1b	regulation of insulin receptor signaling pathway	0.407935
GO:0048009	8.60731	0.118342	16	1	Atxn7	insulin-like growth factor receptor signaling pathway	0.407935
GO:0060716	8.60731	0.118342	16	1	Esx1	labyrinthine layer blood vessel development	0.407935
GO:2000108	8.60731	0.118342	16	1	Anxa1	positive regulation of leukocyte apoptotic process	0.407935
GO:0043254	3.53815	0.118838	76	2	Rac1,Lats1	regulation of protein complex assembly	0.407935
GO:0042692	2.60985	0.120363	155	3	Spag9,Ski,Gpx1	muscle cell differentiation	0.407935
GO:0019216	3.49053	0.121423	77	2	Rac1,Il1b	regulation of lipid metabolic process	0.407935
GO:0032872	3.49053	0.121423	77	2	Spag9,Il1b	regulation of stress-activated MAPK cascade	0.407935
GO:0007254	3.44405	0.124022	78	2	Spag9,Il1b	JNK cascade	0.407935
GO:0048511	3.44405	0.124022	78	2	Pcyt1b,Nrip1	rhythmic process	0.407935
GO:0000086	8.07048	0.125266	17	1	Lats1	G2/M transition of mitotic cell cycle	0.407935
GO:0014037	8.07048	0.125266	17	1	Ski	Schwann cell differentiation	0.407935
GO:0030512	8.07048	0.125266	17	1	Ski	negative regulation of transforming growth factor beta receptor signaling pathway	0.407935
GO:0033028	8.07048	0.125266	17	1	Anxa1	myeloid cell apoptotic process	0.407935
GO:0035690	8.07048	0.125266	17	1	Il1b	cellular response to drug	0.407935
GO:0060325	8.07048	0.125266	17	1	Ski	face morphogenesis	0.407935
GO:0060669	8.07048	0.125266	17	1	Esx1	embryonic placenta morphogenesis	0.407935
GO:0014706	2.55794	0.12554	158	3	Col19a1,Ski,Gpx1	striated muscle tissue development	0.407935
GO:0051098	3.35456	0.12926	80	2	Spag9,Anxa2	regulation of binding	0.407935
GO:0000079	7.59523	0.132136	18	1	Lats1	regulation of cyclin-dependent protein kinase activity	0.407935
GO:0002089	7.59523	0.132136	18	1	Ski	lens morphogenesis in camera-type eye	0.407935
GO:0003382	7.59523	0.132136	18	1	Rac1	epithelial cell morphogenesis	0.407935
GO:0032611	7.59523	0.132136	18	1	Il1b	interleukin-1 beta production	0.407935
GO:0043154	7.59523	0.132136	18	1	Nr4a1	negative regulation of cysteine-type endopeptidase activity involved in apoptotic process	0.407935
GO:0060968	7.59523	0.132136	18	1	Hist1h3e	regulation of gene silencing	0.407935
GO:0090102	7.59523	0.132136	18	1	Rac1	cochlea development	0.407935
GO:2000117	7.59523	0.132136	18	1	Nr4a1	negative regulation of cysteine-type endopeptidase activity	0.407935
GO:0060537	2.47564	0.134348	163	3	Col19a1,Ski,Gpx1	muscle tissue development	0.407935
GO:0032970	3.26954	0.134551	82	2	Rac1,Lats1	regulation of actin filament-based process	0.407935
GO:0006954	2.45984	0.136136	164	3	Il1b,Gpx1,Scn9a	inflammatory response	0.407935
GO:0035108	3.22861	0.137216	83	2	Tbx4,Ski	limb morphogenesis	0.407935
GO:0043434	3.22861	0.137216	83	2	Rhoq,Il1b	response to peptide hormone stimulus	0.407935
GO:0001736	7.17327	0.138954	19	1	Rac1	establishment of planar polarity	0.407935
GO:0021795	7.17327	0.138954	19	1	Rac1	cerebral cortex cell migration	0.407935
GO:0030193	7.17327	0.138954	19	1	Anxa2	regulation of blood coagulation	0.407935
GO:0034446	7.17327	0.138954	19	1	Rac1	substrate adhesion-dependent cell spreading	0.407935
GO:0035020	7.17327	0.138954	19	1	Chn1	regulation of Rac protein signal transduction	0.407935
GO:0042311	7.17327	0.138954	19	1	Gpx1	vasodilation	0.407935
GO:0060071	7.17327	0.138954	19	1	Rac1	Wnt receptor signaling pathway, planar cell polarity pathway	0.407935
GO:0060119	7.17327	0.138954	19	1	Rac1	inner ear receptor cell development	0.407935
GO:0090175	7.17327	0.138954	19	1	Rac1	regulation of establishment of planar polarity	0.407935
GO:0051259	3.18867	0.139892	84	2	Spag9,Aldoa	protein oligomerization	0.407935
GO:0060173	3.14969	0.14258	85	2	Tbx4,Ski	limb development	0.407935
GO:0007059	3.11164	0.145279	86	2	Fam96b,Lats1	chromosome segregation	0.407935
GO:0007586	6.79335	0.145719	20	1	Apoa2	digestion	0.407935
GO:0032729	6.79335	0.145719	20	1	Il12a	positive regulation of interferon-gamma production	0.407935
GO:0042491	6.79335	0.145719	20	1	Rac1	auditory receptor cell differentiation	0.407935
GO:0045833	6.79335	0.145719	20	1	Il1b	negative regulation of lipid metabolic process	0.407935
GO:0046330	6.79335	0.145719	20	1	Il1b	positive regulation of JNK cascade	0.407935
GO:0051568	6.79335	0.145719	20	1	Dpy30	histone H3-K4 methylation	0.407935
GO:0060323	6.79335	0.145719	20	1	Ski	head morphogenesis	0.407935
GO:0060324	6.79335	0.145719	20	1	Ski	face development	0.407935
GO:0001819	3.07449	0.147989	87	2	Il1b,Il12a	positive regulation of cytokine production	0.407935
GO:0010035	3.07449	0.147989	87	2	Nr4a1,Gpx1	response to inorganic substance	0.407935
GO:0021879	6.45331	0.152433	21	1	Rac1	forebrain neuron differentiation	0.407935
GO:0030199	6.45331	0.152433	21	1	Anxa2	collagen fibril organization	0.407935
GO:0032642	6.45331	0.152433	21	1	Il1b	regulation of chemokine production	0.407935
GO:0032755	6.45331	0.152433	21	1	Il1b	positive regulation of interleukin-6 production	0.407935
GO:0035567	6.45331	0.152433	21	1	Rac1	non-canonical Wnt receptor signaling pathway	0.407935
GO:0042308	6.45331	0.152433	21	1	Dact3	negative regulation of protein import into nucleus	0.407935
GO:0042542	6.45331	0.152433	21	1	Gpx1	response to hydrogen peroxide	0.407935
GO:0046324	6.45331	0.152433	21	1	Rhoq	regulation of glucose import	0.407935
GO:0031098	3.00276	0.153442	89	2	Spag9,Il1b	stress-activated protein kinase signaling cascade	0.407935
GO:0051403	3.00276	0.153442	89	2	Spag9,Il1b	stress-activated MAPK cascade	0.407935
GO:0032535	2.96811	0.156183	90	2	Rac1,Lats1	regulation of cellular component size	0.407935
GO:0050727	2.93425	0.158934	91	2	Il1b,Gpx1	regulation of inflammatory response	0.407935
GO:0009408	6.14518	0.159094	22	1	Stac	response to heat	0.407935
GO:0010332	6.14518	0.159094	22	1	Gpx1	response to gamma radiation	0.407935
GO:0032874	6.14518	0.159094	22	1	Il1b	positive regulation of stress-activated MAPK cascade	0.407935
GO:0045446	6.14518	0.159094	22	1	Gpx1	endothelial cell differentiation	0.407935
GO:0046323	6.14518	0.159094	22	1	Rhoq	glucose import	0.407935
GO:0052547	2.86875	0.164464	93	2	Tnfrsf10b,Nr4a1	regulation of peptidase activity	0.411923
GO:0002437	5.86508	0.165705	23	1	Gpx1	inflammatory response to antigenic stimulus	0.411923
GO:0035315	5.86508	0.165705	23	1	Rac1	hair cell differentiation	0.411923
GO:0051897	5.86508	0.165705	23	1	Gpx1	positive regulation of protein kinase B signaling cascade	0.411923
GO:0015711	2.80607	0.17003	95	2	Anxa1,Il1b	organic anion transport	0.411923
GO:0042060	2.80607	0.17003	95	2	Anxa2,Gpx1	wound healing	0.411923
GO:0003158	5.60932	0.172265	24	1	Gpx1	endothelium development	0.411923
GO:0009063	5.60932	0.172265	24	1	Afmid	cellular amino acid catabolic process	0.411923
GO:0034614	5.60932	0.172265	24	1	Gpx1	cellular response to reactive oxygen species	0.411923
GO:0060674	5.60932	0.172265	24	1	Esx1	placenta blood vessel development	0.411923
GO:0061041	5.60932	0.172265	24	1	Anxa2	regulation of wound healing	0.411923
GO:0070588	5.60932	0.172265	24	1	Slc8b1	calcium ion transmembrane transport	0.411923
GO:0030198	2.77573	0.172825	96	2	Col19a1,Anxa2	extracellular matrix organization	0.411923
GO:0007409	2.18014	0.173538	184	3	Rac1,Lhx9,Chn1	axonogenesis	0.411923
GO:0048839	2.74602	0.175629	97	2	Rac1,Cxcl14	inner ear development	0.411923
GO:0001817	2.15542	0.177435	186	3	Apoa2,Il1b,Il12a	regulation of cytokine production	0.411923
GO:0015918	5.37558	0.178774	25	1	Apoa2	sterol transport	0.411923
GO:0022029	5.37558	0.178774	25	1	Rac1	telencephalon cell migration	0.411923
GO:0030301	5.37558	0.178774	25	1	Apoa2	cholesterol transport	0.411923
GO:0030838	5.37558	0.178774	25	1	Rac1	positive regulation of actin filament polymerization	0.411923
GO:0048013	5.37558	0.178774	25	1	Chn1	ephrin receptor signaling pathway	0.411923
GO:0060491	5.37558	0.178774	25	1	Rac1	regulation of cell projection assembly	0.411923
GO:0021537	2.68837	0.181258	99	2	Rac1,Ski	telencephalon development	0.413468
GO:0048871	2.68837	0.181258	99	2	Il1b,Gpx1	multicellular organismal homeostasis	0.413468
GO:0000723	5.15961	0.185234	26	1	Dclre1c	telomere maintenance	0.413468
GO:0001738	5.15961	0.185234	26	1	Rac1	morphogenesis of a polarized epithelium	0.413468
GO:0009948	5.15961	0.185234	26	1	Ski	anterior/posterior axis specification	0.413468
GO:0045766	5.15961	0.185234	26	1	Il1b	positive regulation of angiogenesis	0.413468
GO:0051100	5.15961	0.185234	26	1	Spag9	negative regulation of binding	0.413468
GO:0002526	4.95944	0.191644	27	1	Il1b	acute inflammatory response	0.415975
GO:0016575	4.95944	0.191644	27	1	Ski	histone deacetylation	0.415975
GO:0021872	4.95944	0.191644	27	1	Rac1	forebrain generation of neurons	0.415975
GO:0021885	4.95944	0.191644	27	1	Rac1	forebrain cell migration	0.415975
GO:0043507	4.95944	0.191644	27	1	Spag9	positive regulation of JUN kinase activity	0.415975
GO:0007015	2.58	0.192599	103	2	Rac1,Lats1	actin filament organization	0.415975
GO:0001541	4.77546	0.198004	28	1	Pcyt1b	ovarian follicle development	0.415975
GO:0006200	4.77546	0.198004	28	1	Dqx1	ATP catabolic process	0.415975
GO:0010171	4.77546	0.198004	28	1	Ski	body morphogenesis	0.415975
GO:0019915	4.77546	0.198004	28	1	Nrip1	lipid storage	0.415975
GO:0030032	4.77546	0.198004	28	1	Rac1	lamellipodium assembly	0.415975
GO:0030500	4.77546	0.198004	28	1	Nfe2	regulation of bone mineralization	0.415975
GO:0051262	4.77546	0.198004	28	1	Aldoa	protein tetramerization	0.415975
GO:0090317	4.77546	0.198004	28	1	Dact3	negative regulation of intracellular protein transport	0.415975
GO:0007169	2.00774	0.203344	199	3	Atxn7,Il1b,Chn1	transmembrane receptor protein tyrosine kinase signaling pathway	0.416163
GO:0009203	2.00774	0.203344	199	3	Rac1,Dqx1,Chn1	ribonucleoside triphosphate catabolic process	0.416163
GO:0006576	4.60406	0.204316	29	1	Afmid	cellular biogenic amine metabolic process	0.416163
GO:0030593	4.60406	0.204316	29	1	Il1b	neutrophil chemotaxis	0.416163
GO:0035019	4.60406	0.204316	29	1	Ski	somatic stem cell maintenance	0.416163
GO:0042632	4.60406	0.204316	29	1	Apoa2	cholesterol homeostasis	0.416163
GO:0060322	4.60406	0.204316	29	1	Ski	head development	0.416163
GO:0071417	2.45644	0.20691	108	2	Rhoq,Il1b	cellular response to organic nitrogen	0.416163
GO:0043583	2.43274	0.209787	109	2	Rac1,Cxcl14	ear development	0.416163
GO:0006457	4.44506	0.210579	30	1	Hspa4l	protein folding	0.416163
GO:0006986	4.44506	0.210579	30	1	Hspa4l	response to unfolded protein	0.416163
GO:0030216	4.44506	0.210579	30	1	Lats1	keratinocyte differentiation	0.416163
GO:0030510	4.44506	0.210579	30	1	Ski	regulation of BMP signaling pathway	0.416163
GO:0033555	4.44506	0.210579	30	1	Scn9a	multicellular organismal response to stress	0.416163
GO:0055092	4.44506	0.210579	30	1	Apoa2	sterol homeostasis	0.416163
GO:0006820	2.38732	0.215555	111	2	Anxa1,Il1b	anion transport	0.423425
GO:0007422	4.29605	0.216793	31	1	Ski	peripheral nervous system development	0.423425
GO:0050729	4.29605	0.216793	31	1	Il1b	positive regulation of inflammatory response	0.423425
GO:0009128	4.15705	0.22296	32	1	Dqx1	purine nucleoside monophosphate catabolic process	0.430425
GO:0071621	4.15705	0.22296	32	1	Il1b	granulocyte chemotaxis	0.430425
GO:0090002	4.15705	0.22296	32	1	Rhoq	establishment of protein localization to plasma membrane	0.430425
GO:0017015	4.02632	0.22908	33	1	Ski	regulation of transforming growth factor beta receptor signaling pathway	0.433863
GO:0032273	4.02632	0.22908	33	1	Rac1	positive regulation of protein polymerization	0.433863
GO:0045666	4.02632	0.22908	33	1	Spag9	positive regulation of neuron differentiation	0.433863
GO:0060113	4.02632	0.22908	33	1	Rac1	inner ear receptor cell differentiation	0.433863
GO:0060711	4.02632	0.22908	33	1	Esx1	labyrinthine layer development	0.433863
GO:0006476	3.90363	0.235152	34	1	Ski	protein deacetylation	0.437833
GO:0006919	3.90363	0.235152	34	1	Tnfrsf10b	activation of cysteine-type endopeptidase activity involved in apoptotic process	0.437833
GO:0032387	3.90363	0.235152	34	1	Dact3	negative regulation of intracellular transport	0.437833
GO:0032649	3.90363	0.235152	34	1	Il12a	regulation of interferon-gamma production	0.437833
GO:0008544	2.24064	0.235857	118	2	Rac1,Lats1	epidermis development	0.437833
GO:0000819	3.78826	0.241178	35	1	Lats1	sister chromatid segregation	0.437833
GO:0006641	3.78826	0.241178	35	1	Gpx1	triglyceride metabolic process	0.437833
GO:0021782	3.78826	0.241178	35	1	Ski	glial cell development	0.437833
GO:0042157	3.78826	0.241178	35	1	Apoa2	lipoprotein metabolic process	0.437833
GO:0043484	3.78826	0.241178	35	1	Aff2	regulation of RNA splicing	0.437833
GO:0043506	3.78826	0.241178	35	1	Spag9	regulation of JUN kinase activity	0.437833
GO:0060541	2.20178	0.241684	120	2	Tbx4,Ski	respiratory system development	0.437833
GO:0006839	3.67954	0.247157	36	1	Slc8b1	mitochondrial transport	0.437846
GO:0043542	3.67954	0.247157	36	1	Gpx1	endothelial cell migration	0.437846
GO:0050777	3.67954	0.247157	36	1	Gpx1	negative regulation of immune response	0.437846
GO:0051099	3.67954	0.247157	36	1	Anxa2	positive regulation of binding	0.437846
GO:0009308	3.57695	0.25309	37	1	Afmid	amine metabolic process	0.437846
GO:0010951	3.57695	0.25309	37	1	Nr4a1	negative regulation of endopeptidase activity	0.437846
GO:0042102	3.57695	0.25309	37	1	Il12a	positive regulation of T cell proliferation	0.437846
GO:0050728	3.57695	0.25309	37	1	Gpx1	negative regulation of inflammatory response	0.437846
GO:0016055	2.12801	0.253359	124	2	Rac1,Dact3	Wnt receptor signaling pathway	0.437846
GO:0043623	2.11032	0.256281	125	2	Rac1,Lats1	cellular protein complex assembly	0.437846
GO:0070201	2.11032	0.256281	125	2	Rhoq,Dact3	regulation of establishment of protein localization	0.437846
GO:0002088	3.47923	0.258978	38	1	Ski	lens development in camera-type eye	0.437846
GO:0006814	3.47923	0.258978	38	1	Slc8b1	sodium ion transport	0.437846
GO:0008203	3.47923	0.258978	38	1	Apoa2	cholesterol metabolic process	0.437846
GO:0010923	3.47923	0.258978	38	1	Ppp1r37	negative regulation of phosphatase activity	0.437846
GO:0032675	3.47923	0.258978	38	1	Il1b	regulation of interleukin-6 production	0.437846
GO:0034968	3.47923	0.258978	38	1	Dpy30	histone lysine methylation	0.437846
GO:0042490	3.47923	0.258978	38	1	Rac1	mechanoreceptor differentiation	0.437846
GO:0051896	3.47923	0.258978	38	1	Gpx1	regulation of protein kinase B signaling cascade	0.437846
GO:0051493	2.09291	0.259205	126	2	Rac1,Lats1	regulation of cytoskeleton organization	0.437846
GO:0031344	2.0758	0.262129	127	2	Rac1,Chn1	regulation of cell projection organization	0.441295
GO:0031056	3.38721	0.26482	39	1	Ski	regulation of histone modification	0.441367
GO:0035150	3.38721	0.26482	39	1	Gpx1	regulation of tube size	0.441367
GO:0050880	3.38721	0.26482	39	1	Gpx1	regulation of blood vessel size	0.441367
GO:0010466	3.2998	0.270617	40	1	Nr4a1	negative regulation of peptidase activity	0.4429
GO:0016125	3.2998	0.270617	40	1	Apoa2	sterol metabolic process	0.4429
GO:0021954	3.2998	0.270617	40	1	Rac1	central nervous system neuron development	0.4429
GO:0060021	3.2998	0.270617	40	1	Ski	palate development	0.4429
GO:0071229	3.2998	0.270617	40	1	Anxa2	cellular response to acid	0.4429
GO:0000302	3.21676	0.27637	41	1	Gpx1	response to reactive oxygen species	0.4429
GO:0006639	3.21676	0.27637	41	1	Gpx1	acylglycerol metabolic process	0.4429
GO:0031638	3.21676	0.27637	41	1	Tnfrsf10b	zymogen activation	0.4429
GO:0034599	3.21676	0.27637	41	1	Gpx1	cellular response to oxidative stress	0.4429
GO:0043270	3.21676	0.27637	41	1	Il1b	positive regulation of ion transport	0.4429
GO:0043280	3.21676	0.27637	41	1	Tnfrsf10b	positive regulation of cysteine-type endopeptidase activity involved in apoptotic process	0.4429
GO:0060349	3.21676	0.27637	41	1	Ski	bone morphogenesis	0.4429
GO:0043410	1.97858	0.279683	133	2	Spag9,Il1b	positive regulation of MAPK cascade	0.443518
GO:0030282	3.13776	0.282078	42	1	Nfe2	bone mineralization	0.443518
GO:0048813	3.13776	0.282078	42	1	Rac1	dendrite morphogenesis	0.443518
GO:0051495	3.13776	0.282078	42	1	Rac1	positive regulation of cytoskeleton organization	0.443518
GO:0055088	3.13776	0.282078	42	1	Apoa2	lipid homeostasis	0.443518
GO:2001056	3.13776	0.282078	42	1	Tnfrsf10b	positive regulation of cysteine-type endopeptidase activity	0.443518
GO:0006638	3.06252	0.287742	43	1	Gpx1	neutral lipid metabolic process	0.445421
GO:0008286	3.06252	0.287742	43	1	Il1b	insulin receptor signaling pathway	0.445421
GO:0032609	3.06252	0.287742	43	1	Il12a	interferon-gamma production	0.445421
GO:0043123	3.06252	0.287742	43	1	Il1b	positive regulation of I-kappaB kinase/NF-kappaB cascade	0.445421
GO:0072659	3.06252	0.287742	43	1	Rhoq	protein localization to plasma membrane	0.445421
GO:0043588	1.91858	0.291379	137	2	Rac1,Lats1	skin development	0.449659
GO:0010950	2.9908	0.293362	44	1	Tnfrsf10b	positive regulation of endopeptidase activity	0.449942
GO:0043393	2.9908	0.293362	44	1	Spag9	regulation of protein binding	0.449942
GO:0009798	2.92233	0.298939	45	1	Ski	axis specification	0.454315
GO:0034976	2.92233	0.298939	45	1	Tnfrsf10b	response to endoplasmic reticulum stress	0.454315
GO:0042306	2.92233	0.298939	45	1	Dact3	regulation of protein import into nucleus	0.454315
GO:0007243	2.85691	0.304473	46	1	Mapk11	intracellular protein kinase cascade	0.458544
GO:0021987	2.85691	0.304473	46	1	Rac1	cerebral cortex development	0.458544
GO:0046883	2.85691	0.304473	46	1	Il1b	regulation of hormone secretion	0.458544
GO:0000187	2.79434	0.309965	47	1	Spag9	activation of MAPK activity	0.462634
GO:0031334	2.79434	0.309965	47	1	Rac1	positive regulation of protein complex assembly	0.462634
GO:0032319	2.79434	0.309965	47	1	Chn1	regulation of Rho GTPase activity	0.462634
GO:0007292	2.73434	0.315414	48	1	Nrip1	female gamete generation	0.465212
GO:0030509	2.73434	0.315414	48	1	Ski	BMP signaling pathway	0.465212
GO:0031214	2.73434	0.315414	48	1	Nfe2	biomineral tissue development	0.465212
GO:0043491	2.73434	0.315414	48	1	Gpx1	protein kinase B signaling cascade	0.465212
GO:0022604	1.783	0.320525	147	2	Rhoq,Chn1	regulation of cell morphogenesis	0.466309
GO:0001508	2.67695	0.32082	49	1	Ski	regulation of action potential	0.466309
GO:0008584	2.67695	0.32082	49	1	Lhx9	male gonad development	0.466309
GO:0046546	2.67695	0.32082	49	1	Lhx9	development of primary male sexual characteristics	0.466309
GO:0046632	2.67695	0.32082	49	1	Anxa1	alpha-beta T cell differentiation	0.466309
GO:0010952	2.6219	0.326186	50	1	Tnfrsf10b	positive regulation of peptidase activity	0.467519
GO:0030595	2.6219	0.326186	50	1	Il1b	leukocyte chemotaxis	0.467519
GO:0046034	2.6219	0.326186	50	1	Dqx1	ATP metabolic process	0.467519
GO:0048593	2.6219	0.326186	50	1	Ski	camera-type eye morphogenesis	0.467519
GO:0033674	1.75811	0.326328	149	2	Rac1,Spag9	positive regulation of kinase activity	0.467519
GO:0009314	1.74591	0.329225	150	2	Dclre1c,Gpx1	response to radiation	0.469096
GO:0008360	2.56904	0.331509	51	1	Rhoq	regulation of cell shape	0.469096
GO:0016042	2.56904	0.331509	51	1	Il1b	lipid catabolic process	0.469096
GO:0050671	2.56904	0.331509	51	1	Il12a	positive regulation of lymphocyte proliferation	0.469096
GO:0030162	1.73388	0.33212	151	2	Tnfrsf10b,Nr4a1	regulation of proteolysis	0.469096
GO:0007596	2.5181	0.336792	52	1	Anxa2	blood coagulation	0.471121
GO:0010921	2.5181	0.336792	52	1	Ppp1r37	regulation of phosphatase activity	0.471121
GO:0030178	2.5181	0.336792	52	1	Dact3	negative regulation of Wnt receptor signaling pathway	0.471121
GO:0009617	1.71028	0.337899	153	2	Il1b,Gpx1	response to bacterium	0.471121
GO:0007599	2.4694	0.342034	53	1	Anxa2	hemostasis	0.471121
GO:0010631	2.4694	0.342034	53	1	Gpx1	epithelial cell migration	0.471121
GO:0030308	2.4694	0.342034	53	1	Dact3	negative regulation of cell growth	0.471121
GO:0042472	2.4694	0.342034	53	1	Rac1	inner ear morphogenesis	0.471121
GO:0050770	2.4694	0.342034	53	1	Chn1	regulation of axonogenesis	0.471121
GO:0001776	2.42251	0.347235	54	1	Anxa1	leukocyte homeostasis	0.475664
GO:0016571	2.42251	0.347235	54	1	Dpy30	histone methylation	0.475664
GO:0042552	2.37702	0.352396	55	1	Ski	myelination	0.480104
GO:0072593	2.37702	0.352396	55	1	Gpx1	reactive oxygen species metabolic process	0.480104
GO:0016458	2.33345	0.357517	56	1	Hist1h3e	gene silencing	0.483132
GO:0042493	2.33345	0.357517	56	1	Il1b	response to drug	0.483132
GO:0045765	2.33345	0.357517	56	1	Il1b	regulation of angiogenesis	0.483132
GO:0006909	2.29141	0.362599	57	1	Rac1	phagocytosis	0.483465
GO:0008366	2.29141	0.362599	57	1	Ski	axon ensheathment	0.483465
GO:0031346	2.29141	0.362599	57	1	Rac1	positive regulation of cell projection organization	0.483465
GO:0033044	2.29141	0.362599	57	1	Ski	regulation of chromosome organization	0.483465
GO:0060348	2.29141	0.362599	57	1	Ski	bone development	0.483465
GO:0032880	1.61142	0.363728	162	2	Rhoq,Dact3	regulation of protein localization	0.48368
GO:0007605	2.25083	0.367641	58	1	Gpx1	sensory perception of sound	0.486298
GO:0035023	2.25083	0.367641	58	1	Chn1	regulation of Rho protein signal transduction	0.486298
GO:0051347	1.59094	0.369422	164	2	Rac1,Spag9	positive regulation of transferase activity	0.486481
GO:0016197	2.21152	0.372645	59	1	Dpy30	endosomal transport	0.486481
GO:0045216	2.21152	0.372645	59	1	Rac1	cell-cell junction organization	0.486481
GO:0060047	2.21152	0.372645	59	1	Gpx1	heart contraction	0.486481
GO:0060326	2.21152	0.372645	59	1	Il1b	cell chemotaxis	0.486481
GO:0007009	2.17384	0.377609	60	1	Rhoq	plasma membrane organization	0.487022
GO:0035303	2.17384	0.377609	60	1	Ppp1r37	regulation of dephosphorylation	0.487022
GO:0042471	2.17384	0.377609	60	1	Rac1	ear morphogenesis	0.487022
GO:0060041	2.17384	0.377609	60	1	Ski	retina development in camera-type eye	0.487022
GO:0030900	1.56115	0.377929	167	2	Rac1,Ski	forebrain development	0.487022
GO:0016570	1.55146	0.380755	168	2	Dpy30,Ski	histone modification	0.48912
GO:0046661	2.13719	0.382536	61	1	Lhx9	male sex differentiation	0.48912
GO:0006184	1.54189	0.383576	169	2	Rac1,Chn1	GTP catabolic process	0.48912
GO:0045664	1.54189	0.383576	169	2	Spag9,Chn1	regulation of neuron differentiation	0.48912
GO:0021543	2.10177	0.387424	62	1	Rac1	pallium development	0.48912
GO:0030183	2.10177	0.387424	62	1	Dclre1c	B cell differentiation	0.48912
GO:0046631	2.10177	0.387424	62	1	Anxa1	alpha-beta T cell activation	0.48912
GO:0001843	2.06751	0.392274	63	1	Ski	neural tube closure	0.48912
GO:0019228	2.06751	0.392274	63	1	Ski	regulation of action potential in neuron	0.48912
GO:0042129	2.06751	0.392274	63	1	Il12a	regulation of T cell proliferation	0.48912
GO:0046822	2.06751	0.392274	63	1	Dact3	regulation of nucleocytoplasmic transport	0.48912
GO:0050954	2.06751	0.392274	63	1	Gpx1	sensory perception of mechanical stimulus	0.48912
GO:0060606	2.06751	0.392274	63	1	Ski	tube closure	0.48912
GO:0007179	2.03428	0.397087	64	1	Ski	transforming growth factor beta receptor signaling pathway	0.492664
GO:0034504	2.03428	0.397087	64	1	Dact3	protein localization to nucleus	0.492664
GO:0030098	1.47796	0.403176	176	2	Anxa1,Dclre1c	lymphocyte differentiation	0.49898
GO:0043122	1.94084	0.411303	67	1	Il1b	regulation of I-kappaB kinase/NF-kappaB cascade	0.507782
GO:0046879	1.88311	0.420598	69	1	Il1b	hormone secretion	0.517978
GO:0001892	1.85552	0.425191	70	1	Esx1	embryonic placenta development	0.521068
GO:0071560	1.85552	0.425191	70	1	Ski	cellular response to transforming growth factor beta stimulus	0.521068
GO:0008380	1.82872	0.429749	71	1	Aff2	RNA splicing	0.524084
GO:0048592	1.82872	0.429749	71	1	Ski	eye morphogenesis	0.524084
GO:0006479	1.7772	0.438759	73	1	Dpy30	protein methylation	0.531429
GO:0016358	1.7772	0.438759	73	1	Rac1	dendrite development	0.531429
GO:0001101	1.75255	0.443212	74	1	Anxa2	response to acid	0.531429
GO:0008202	1.75255	0.443212	74	1	Apoa2	steroid metabolic process	0.531429
GO:0019226	1.75255	0.443212	74	1	Ski	transmission of nerve impulse	0.531429
GO:0043406	1.75255	0.443212	74	1	Spag9	positive regulation of MAP kinase activity	0.531429
GO:0045786	1.75255	0.443212	74	1	Lats1	negative regulation of cell cycle	0.531429
GO:0010001	1.72856	0.44763	75	1	Ski	glial cell differentiation	0.535443
GO:0006302	1.70521	0.452014	76	1	Dclre1c	double-strand break repair	0.535638
GO:0015672	1.70521	0.452014	76	1	Slc8b1	monovalent inorganic cation transport	0.535638
GO:0032147	1.70521	0.452014	76	1	Spag9	activation of protein kinase activity	0.535638
GO:0006470	1.68247	0.456364	77	1	Dusp9	protein dephosphorylation	0.535638
GO:0009101	1.68247	0.456364	77	1	Itm2b	glycoprotein biosynthetic process	0.535638
GO:0009791	1.68247	0.456364	77	1	Scn9a	post-embryonic development	0.535638
GO:0050870	1.68247	0.456364	77	1	Il12a	positive regulation of T cell activation	0.535638
GO:0051047	1.68247	0.456364	77	1	Il1b	positive regulation of secretion	0.535638
GO:0050900	1.66032	0.46068	78	1	Il1b	leukocyte migration	0.539438
GO:0019827	1.63874	0.464963	79	1	Ski	stem cell maintenance	0.541914
GO:2000027	1.63874	0.464963	79	1	Rac1	regulation of organ morphogenesis	0.541914
GO:0001841	1.61771	0.469212	80	1	Ski	neural tube formation	0.545595
GO:0007611	1.5972	0.473428	81	1	Aff2	learning or memory	0.54795
GO:0030111	1.5972	0.473428	81	1	Dact3	regulation of Wnt receptor signaling pathway	0.54795
GO:0007249	1.57719	0.477612	82	1	Il1b	I-kappaB kinase/NF-kappaB cascade	0.550244
GO:0021953	1.57719	0.477612	82	1	Rac1	central nervous system neuron differentiation	0.550244
GO:0030278	1.55768	0.481763	83	1	Nfe2	regulation of ossification	0.552481
GO:0050890	1.55768	0.481763	83	1	Aff2	cognition	0.552481
GO:0072657	1.52004	0.489969	85	1	Rhoq	protein localization to membrane	0.560605
GO:0043523	1.50189	0.494024	86	1	Gpx1	regulation of neuron apoptotic process	0.563955
GO:0042098	1.48416	0.498048	87	1	Il12a	T cell proliferation	0.567253
GO:0002262	1.46684	0.50204	88	1	Anxa1	myeloid cell homeostasis	0.568541
GO:0006979	1.46684	0.50204	88	1	Gpx1	response to oxidative stress	0.568541
GO:0001838	1.44991	0.506002	89	1	Ski	embryonic epithelial tube formation	0.568541
GO:0006606	1.44991	0.506002	89	1	Dact3	protein import into nucleus	0.568541
GO:0010769	1.44991	0.506002	89	1	Chn1	regulation of cell morphogenesis involved in differentiation	0.568541
GO:1901214	1.44991	0.506002	89	1	Gpx1	regulation of neuron death	0.568541
GO:0072175	1.43336	0.509932	90	1	Ski	epithelial tube formation	0.571673
GO:0032496	1.41718	0.513832	91	1	Il1b	response to lipopolysaccharide	0.573473
GO:0051170	1.41718	0.513832	91	1	Dact3	nuclear import	0.573473
GO:0006310	1.40136	0.517702	92	1	Dclre1c	DNA recombination	0.575224
GO:0071902	1.40136	0.517702	92	1	Spag9	positive regulation of protein serine/threonine kinase activity	0.575224
GO:0001558	1.37073	0.525351	94	1	Dact3	regulation of cell growth	0.581463
GO:0010638	1.35592	0.529131	95	1	Rac1	positive regulation of organelle organization	0.581463
GO:0017038	1.35592	0.529131	95	1	Dact3	protein import	0.581463
GO:0035148	1.35592	0.529131	95	1	Ski	tube formation	0.581463
GO:0045926	1.35592	0.529131	95	1	Dact3	negative regulation of growth	0.581463
GO:0001667	1.3272	0.536603	97	1	Gpx1	ameboidal cell migration	0.587093
GO:0050878	1.3272	0.536603	97	1	Anxa2	regulation of body fluid levels	0.587093
GO:0001890	1.29964	0.543959	99	1	Esx1	placenta development	0.59126
GO:0009100	1.29964	0.543959	99	1	Itm2b	glycoprotein metabolic process	0.59126
GO:0034220	1.29964	0.543959	99	1	Slc8b1	ion transmembrane transport	0.59126
GO:0051402	1.28628	0.547594	100	1	Gpx1	neuron apoptotic process	0.59392
GO:0032259	1.27319	0.551201	101	1	Dpy30	methylation	0.595249
GO:0046578	1.27319	0.551201	101	1	Chn1	regulation of Ras protein signal transduction	0.595249
GO:0006816	1.26036	0.55478	102	1	Slc8b1	calcium ion transport	0.595257
GO:0031589	1.26036	0.55478	102	1	Rac1	cell-substrate adhesion	0.595257
GO:0045444	1.26036	0.55478	102	1	Gpx1	fat cell differentiation	0.595257
GO:0030324	1.23544	0.561854	104	1	Tbx4	lung development	0.598887
GO:0070997	1.23544	0.561854	104	1	Gpx1	neuron death	0.598887
GO:0002237	1.22334	0.565349	105	1	Il1b	response to molecule of bacterial origin	0.598887
GO:0007626	1.22334	0.565349	105	1	Npas3	locomotory behavior	0.598887
GO:0010975	1.22334	0.565349	105	1	Chn1	regulation of neuron projection development	0.598887
GO:0051056	1.22334	0.565349	105	1	Chn1	regulation of small GTPase mediated signal transduction	0.598887
GO:0009952	1.21147	0.568818	106	1	Ski	anterior/posterior pattern specification	0.599852
GO:0016331	1.21147	0.568818	106	1	Ski	morphogenesis of embryonic epithelium	0.599852
GO:0030323	1.19982	0.572259	107	1	Tbx4	respiratory tube development	0.599852
GO:0048705	1.19982	0.572259	107	1	Ski	skeletal system morphogenesis	0.599852
GO:0051251	1.19982	0.572259	107	1	Il12a	positive regulation of lymphocyte activation	0.599852
GO:0021915	1.1884	0.575673	108	1	Ski	neural tube development	0.602169
GO:0043087	1.16617	0.582423	110	1	Chn1	regulation of GTPase activity	0.607957
GO:0033124	1.15536	0.585758	111	1	Chn1	regulation of GTP catabolic process	0.608896
GO:0055114	1.15536	0.585758	111	1	Gpx1	oxidation-reduction process	0.608896
GO:0002683	1.14474	0.589067	112	1	Gpx1	negative regulation of immune system process	0.6098
GO:0051223	1.14474	0.589067	112	1	Dact3	regulation of protein transport	0.6098
GO:0006520	1.12407	0.595608	114	1	Afmid	cellular amino acid metabolic process	0.615297
GO:0042113	1.10412	0.602047	116	1	Dclre1c	B cell activation	0.620667
GO:0007264	1.08485	0.608386	118	1	Rac1	small GTPase mediated signal transduction	0.625911
GO:0010817	1.07545	0.611518	119	1	Il1b	regulation of hormone levels	0.627842
GO:0030031	1.05719	0.61771	121	1	Rac1	cell projection assembly	0.630316
GO:0032943	1.05719	0.61771	121	1	Il12a	mononuclear cell proliferation	0.630316
GO:0046651	1.05719	0.61771	121	1	Il12a	lymphocyte proliferation	0.630316
GO:0007178	1.04826	0.620769	122	1	Ski	transmembrane receptor protein serine/threonine kinase signaling pathway	0.632148
GO:0010256	1.03947	0.623805	123	1	Rhoq	endomembrane system organization	0.632662
GO:0016049	1.03947	0.623805	123	1	Dact3	cell growth	0.632662
GO:0061024	1.40295	0.655873	185	2	Rac1,Rhoq	membrane organization	0.663839
GO:0008015	1.03082	1	124	1	Gpx1	blood circulation	1
GO:0014070	1.01395	1	126	1	Il1b	response to organic cyclic compound	1
GO:0030217	1.03082	1	124	1	Anxa1	T cell differentiation	1
GO:0050863	1.03082	1	124	1	Il12a	regulation of T cell activation	1
GO:0055085	1.01395	1	126	1	Slc8b1	transmembrane transport	1
GO:0070661	1.02232	1	125	1	Il12a	leukocyte proliferation	1

## Sheet: component 8 negative
	odds.ratio	p.value	n.categoy	n.category.and.component	genes	description	FDR
GO:0030198	3.92218	0.000101265	96	13	Hpn,Col5a3,Tfap2a,Lox,Col5a2,Col3a1,Col5a1,Postn,Cyr61,P3h1,Eln,Loxl2,Tnfrsf11b	extracellular matrix organization	0.0487024
GO:0030199	9.81345	0.000126172	21	6	Lox,Col5a2,Col3a1,Col5a1,P3h1,Loxl2	collagen fibril organization	0.0487024
GO:0003007	2.95151	0.00174347	113	12	Tfap2a,Ptch1,Wnt5a,Adamts1,Col5a1,Cyr61,Sema3c,Tgfbr3,Ephb4,Epo,Ttn,Heg1	heart morphogenesis	0.448653
GO:0060039	8.8484	0.00241085	15	4	Wnt5a,Tgfbr3,Epo,Heg1	pericardium development	0.465294
GO:0014031	3.45049	0.00410447	65	8	Hpn,Phox2b,Tfap2a,Sema3c,Tgfbr3,Ednra,Loxl2,Cfl1	mesenchymal cell development	0.513346
GO:0014032	5.08209	0.00532178	29	5	Phox2b,Tfap2a,Sema3c,Ednra,Cfl1	neural crest cell development	0.513346
GO:0002438	10.3871	0.00616898	10	3	Zp3,Il20rb,Serpinb9	acute inflammatory response to antigenic stimulus	0.513346
GO:0048486	10.3871	0.00616898	10	3	Phox2b,Tfap2a,Hoxa1	parasympathetic nervous system development	0.513346
GO:0048762	3.11851	0.00704766	71	8	Hpn,Phox2b,Tfap2a,Sema3c,Tgfbr3,Ednra,Loxl2,Cfl1	mesenchymal cell differentiation	0.513346
GO:0002456	4.51504	0.00818744	32	5	Zp3,Pnp,Il20rb,Serpinb9,B2m	T cell mediated immunity	0.513346
GO:0043200	4.51504	0.00818744	32	5	Col1a1,Col5a2,Col3a1,Col1a2,Cfl1	response to amino acid stimulus	0.513346
GO:0006506	9.08848	0.00823429	11	3	Pigt,Piga,Mppe1	GPI anchor biosynthetic process	0.513346
GO:0014033	4.35326	0.00934212	33	5	Phox2b,Tfap2a,Sema3c,Ednra,Cfl1	neural crest cell differentiation	0.513346
GO:0019395	5.40148	0.0103695	22	4	Pex13,Bdh2,Decr1,Cyp4v3	fatty acid oxidation	0.513346
GO:0048483	5.40148	0.0103695	22	4	Phox2b,Tfap2a,Hoxa1,Tlx2	autonomic nervous system development	0.513346
GO:0051291	8.07892	0.0106586	12	3	Col1a1,C1qtnf6,Col1a2	protein heterooligomerization	0.513346
GO:0006661	5.11708	0.0121665	23	4	Zp3,Pigt,Piga,Mppe1	phosphatidylinositol biosynthetic process	0.513346
GO:0003209	7.2692	0.0134526	13	3	Wnt5a,Cyr61,Heg1	cardiac atrium morphogenesis	0.513346
GO:0006505	7.2692	0.0134526	13	3	Pigt,Piga,Mppe1	GPI anchor metabolic process	0.513346
GO:0009409	7.2692	0.0134526	13	3	Adrb3,Cdh8,Pcsk1n	response to cold	0.513346
GO:0001656	3.80691	0.0150793	37	5	Tfap2a,Ptch1,Kif26b,Slit2,Robo2	metanephros development	0.513346
GO:0021953	2.64967	0.0162394	82	8	Phox2b,Tfap2a,Id4,Wnt5a,Hoxa1,Dbx1,Prdm8,Nkx6-2	central nervous system neuron differentiation	0.513346
GO:0071230	4.62788	0.0163304	25	4	Col1a1,Col5a2,Col3a1,Col1a2	cellular response to amino acid stimulus	0.513346
GO:0009247	6.60765	0.0166239	14	3	Pigt,Piga,Mppe1	glycolipid biosynthetic process	0.513346
GO:0040015	6.60765	0.0166239	14	3	Ptch1,Adrb3,Bbs2	negative regulation of multicellular organism growth	0.513346
GO:0002526	4.22453	0.0212909	27	4	Zp3,Plscr1,Il20rb,Serpinb9	acute inflammatory response	0.632175
GO:0007606	4.04793	0.0240811	28	4	Gjb4,Pkd1l3,Olfr330,Omp	sensory perception of chemical stimulus	0.64164
GO:0046474	3.2893	0.0250612	42	5	Zp3,Pigt,Piga,Plscr1,Mppe1	glycerophospholipid biosynthetic process	0.64164
GO:0060322	3.88554	0.0270825	29	4	Col1a1,Twist2,Tfap2a,Ednra	head development	0.64164
GO:0003231	2.81369	0.0274952	58	6	Wnt5a,Cyr61,Sema3c,Tgfbr3,Epo,Heg1	cardiac ventricle development	0.64164
GO:0010721	2.81369	0.0274952	58	6	Hpn,Id4,Wnt5a,Tgfbr3,Nkx6-2,Tlx2	negative regulation of cell development	0.64164
GO:0007608	5.18976	0.0284364	17	3	Gjb4,Olfr330,Omp	sensory perception of smell	0.64164
GO:0060325	5.18976	0.0284364	17	3	Col1a1,Twist2,Tfap2a	face morphogenesis	0.64164
GO:0002711	4.84284	0.0331402	18	3	Zp3,Pnp,B2m	positive regulation of T cell mediated immunity	0.64164
GO:0060603	3.59628	0.0337294	31	4	Ccl11,Ptch1,Wnt5a,Slit2	mammary gland duct morphogenesis	0.64164
GO:0001525	2.05364	0.033913	156	12	Crhr2,Ccl11,Adamts1,Thbs2,Cyr61,Ephb4,Epo,Adm,Ednra,Loxl2,Epgn,Cxcl12	angiogenesis	0.64164
GO:0001913	4.53968	0.0382223	19	3	Pnp,Serpinb9,B2m	T cell mediated cytotoxicity	0.64164
GO:0008654	2.89519	0.0385209	47	5	Zp3,Pigt,Piga,Plscr1,Mppe1	phospholipid biosynthetic process	0.64164
GO:0001755	4.27207	0.0436771	20	3	Phox2b,Sema3c,Cfl1	neural crest cell migration	0.64164
GO:0060323	4.27207	0.0436771	20	3	Col1a1,Twist2,Tfap2a	head morphogenesis	0.64164
GO:0060324	4.27207	0.0436771	20	3	Col1a1,Twist2,Tfap2a	face development	0.64164
GO:0009953	2.76262	0.0449353	49	5	Ptch1,Wnt5a,Dbx1,Nkx6-2,Hhip	dorsal/ventral pattern formation	0.64164
GO:0032649	3.23499	0.0453308	34	4	Zp3,Wnt5a,Il1rl1,Il20rb	regulation of interferon-gamma production	0.64164
GO:0009062	4.03422	0.0494976	21	3	Pex13,Bdh2,Decr1	fatty acid catabolic process	0.64164
GO:0021545	4.03422	0.0494976	21	3	Phox2b,Tfap2a,Hoxa1	cranial nerve development	0.64164
GO:0001909	3.03178	0.0541551	36	4	Pnp,Cxcl5,Serpinb9,B2m	leukocyte mediated cytotoxicity	0.64164
GO:0046545	2.5851	0.0556869	52	5	Zp3,Adamts1,Oas1d,Dach1,Zfx	development of primary female sexual characteristics	0.64164
GO:0061180	2.5851	0.0556869	52	5	Ccl11,Ptch1,Wnt5a,Elf5,Slit2	mammary gland epithelium development	0.64164
GO:0001667	2.19716	0.0580167	97	8	Phox2b,Wnt5a,Sema3c,Tgfbr3,Ephb4,Loxl2,Cfl1,Cxcl12	ameboidal cell migration	0.64164
GO:0060485	2.19716	0.0580167	97	8	Hpn,Phox2b,Tfap2a,Sema3c,Tgfbr3,Ednra,Loxl2,Cfl1	mesenchyme development	0.64164
GO:0002026	6.03314	0.0581165	10	2	Atp2a2,Adra1b	regulation of the force of heart contraction	0.64164
GO:0043616	6.03314	0.0581165	10	2	Twist2,Ptch1	keratinocyte proliferation	0.64164
GO:0048485	6.03314	0.0581165	10	2	Phox2b,Tfap2a	sympathetic nervous system development	0.64164
GO:0002437	3.62946	0.0622021	23	3	Zp3,Il20rb,Serpinb9	inflammatory response to antigenic stimulus	0.64164
GO:0016525	3.62946	0.0622021	23	3	Crhr2,Adamts1,Thbs2	negative regulation of angiogenesis	0.64164
GO:0061383	3.62946	0.0622021	23	3	Col1a1,Adamts1,Tgfbr3	trabecula morphogenesis	0.64164
GO:0042445	2.47847	0.063611	54	5	Hpn,Cga,Cyp11a1,Pcsk1n,Adh7	hormone metabolic process	0.64164
GO:0050680	2.85246	0.0638418	38	4	Hpn,Ptch1,Wnt5a,Tgfbr3	negative regulation of epithelial cell proliferation	0.64164
GO:0022602	2.77048	0.0690036	39	4	Zp3,Adamts1,Oas1d,Zfx	ovulation cycle process	0.64164
GO:0035150	2.77048	0.0690036	39	4	Tgfbr3,Adrb3,Ednra,Adra1b	regulation of tube size	0.64164
GO:0050880	2.77048	0.0690036	39	4	Tgfbr3,Adrb3,Ednra,Adra1b	regulation of blood vessel size	0.64164
GO:0000288	5.36356	0.0692014	11	2	Pan3,Cnot7	nuclear-transcribed mRNA catabolic process, deadenylation-dependent decay	0.64164
GO:0007031	5.36356	0.0692014	11	2	Fis1,Pex13	peroxisome organization	0.64164
GO:0021602	5.36356	0.0692014	11	2	Tfap2a,Hoxa1	cranial nerve morphogenesis	0.64164
GO:0021884	5.36356	0.0692014	11	2	Tfap2a,Wnt5a	forebrain neuron development	0.64164
GO:0032689	5.36356	0.0692014	11	2	Il1rl1,Il20rb	negative regulation of interferon-gamma production	0.64164
GO:0042481	5.36356	0.0692014	11	2	Tfap2a,Tnfrsf11b	regulation of odontogenesis	0.64164
GO:0043043	5.36356	0.0692014	11	2	Bdh2,Carns1	peptide biosynthetic process	0.64164
GO:0050910	5.36356	0.0692014	11	2	Hpn,Adgrv1	detection of mechanical stimulus involved in sensory perception of sound	0.64164
GO:0060122	5.36356	0.0692014	11	2	Whrn,Adgrv1	inner ear receptor stereocilium organization	0.64164
GO:0009615	2.17776	0.0710063	73	6	Mx1,Plscr1,Cxcl10,Oas1a,Ifit3,Tgtp1	response to virus	0.64164
GO:0006643	2.38046	0.0721373	56	5	Pigt,Ormdl2,Cyr61,Piga,Mppe1	membrane lipid metabolic process	0.64164
GO:0045765	2.38046	0.0721373	56	5	Crhr2,Ccl11,Adamts1,Thbs2,Adm	regulation of angiogenesis	0.64164
GO:0021954	2.69306	0.0743741	40	4	Phox2b,Tfap2a,Wnt5a,Prdm8	central nervous system neuron development	0.64164
GO:0030258	2.69306	0.0743741	40	4	Pex13,Bdh2,Decr1,Cyp4v3	lipid modification	0.64164
GO:0044242	2.69306	0.0743741	40	4	Pex13,Aadac,Bdh2,Decr1	cellular lipid catabolic process	0.64164
GO:0071229	2.69306	0.0743741	40	4	Col1a1,Col5a2,Col3a1,Col1a2	cellular response to acid	0.64164
GO:0001101	2.14541	0.0748192	74	6	Col1a1,Ptch1,Col5a2,Col3a1,Col1a2,Cfl1	response to acid	0.64164
GO:0002064	2.14541	0.0748192	74	6	Tfap2a,Wnt5a,Cryaa,Vim,Dact2,Heg1	epithelial cell development	0.64164
GO:0006164	2.61988	0.07995	41	4	Pnp,Adrb3,Ednra,Oas1a	purine nucleotide biosynthetic process	0.64164
GO:0042698	2.61988	0.07995	41	4	Zp3,Adamts1,Oas1d,Zfx	ovulation cycle	0.64164
GO:0060443	2.61988	0.07995	41	4	Ccl11,Ptch1,Wnt5a,Slit2	mammary gland morphogenesis	0.64164
GO:0000266	4.82566	0.08091	12	2	Fis1,Mul1	mitochondrial fission	0.64164
GO:0007340	4.82566	0.08091	12	2	Zp3,Trim36	acrosome reaction	0.64164
GO:0010977	4.82566	0.08091	12	2	Runx1t1,Vim	negative regulation of neuron projection development	0.64164
GO:0022409	4.82566	0.08091	12	2	Wnt5a,Kif26b	positive regulation of cell-cell adhesion	0.64164
GO:0030204	4.82566	0.08091	12	2	Dcn,Bgn	chondroitin sulfate metabolic process	0.64164
GO:0045686	4.82566	0.08091	12	2	Id4,Nkx6-2	negative regulation of glial cell differentiation	0.64164
GO:0046889	4.82566	0.08091	12	2	Zp3,Cyr61	positive regulation of lipid biosynthetic process	0.64164
GO:0048857	4.82566	0.08091	12	2	Phox2b,Hoxa1	neural nucleus development	0.64164
GO:0060841	4.82566	0.08091	12	2	Sema3c,Heg1	venous blood vessel development	0.64164
GO:0071805	4.82566	0.08091	12	2	Hpn,Kcnt1	potassium ion transmembrane transport	0.64164
GO:0007605	2.28991	0.0812592	58	5	Hpn,Tfap2a,Myo1a,Whrn,Adgrv1	sensory perception of sound	0.64164
GO:0045785	2.28991	0.0812592	58	5	Wnt5a,Kif26b,Cyr61,Vav1,Fbln2	positive regulation of cell adhesion	0.64164
GO:0061035	3.15456	0.0837642	26	3	Wnt5a,Cyr61,Loxl2	regulation of cartilage development	0.64164
GO:0061053	2.55029	0.0857278	42	4	Ptch1,Wnt5a,Sema3c,Ttn	somite development	0.64164
GO:0055114	1.89354	0.0861456	111	8	Aldh3a1,Pex13,Bdh2,Decr1,Loxl2,Adra1b,Trabd2b,Cyp4v3	oxidation-reduction process	0.64164
GO:0003281	3.02262	0.0915734	27	3	Wnt5a,Cyr61,Heg1	ventricular septum development	0.64164
GO:0006497	3.02262	0.0915734	27	3	Pigt,Piga,Mppe1	protein lipidation	0.64164
GO:0032609	2.48454	0.0917034	43	4	Zp3,Wnt5a,Il1rl1,Il20rb	interferon-gamma production	0.64164
GO:2000147	2.05429	0.092475	90	7	Zp3,Tfap2a,Cyr61,Tmsb4x,Trim32,Elp6,Cxcl12	positive regulation of cell motility	0.64164
GO:0001916	4.38659	0.093175	13	2	Pnp,B2m	positive regulation of T cell mediated cytotoxicity	0.64164
GO:0002820	4.38659	0.093175	13	2	Il1rl1,Il20rb	negative regulation of adaptive immune response	0.64164
GO:0006400	4.38659	0.093175	13	2	Pus1,Tyw5	tRNA modification	0.64164
GO:0030728	4.38659	0.093175	13	2	Adamts1,Oas1d	ovulation	0.64164
GO:0042168	4.38659	0.093175	13	2	Slc11a2,Bdh2	heme metabolic process	0.64164
GO:0051702	4.38659	0.093175	13	2	Hpn,Cxcl5	interaction with symbiont	0.64164
GO:0060561	4.38659	0.093175	13	2	Cryaa,Cyr61	apoptotic process involved in morphogenesis	0.64164
GO:0070306	4.38659	0.093175	13	2	Cryaa,Vim	lens fiber cell differentiation	0.64164
GO:0090103	4.38659	0.093175	13	2	Hpn,Wnt5a	cochlea morphogenesis	0.64164
GO:0046488	2.42203	0.0978727	44	4	Zp3,Pigt,Piga,Mppe1	phosphatidylinositol metabolic process	0.64164
GO:0001541	2.90124	0.0996725	28	3	Zp3,Oas1d,Zfx	ovarian follicle development	0.64164
GO:0006029	2.90124	0.0996725	28	3	Dcn,Bgn,Hs3st5	proteoglycan metabolic process	0.64164
GO:0008652	2.90124	0.0996725	28	3	Psph,Plscr1,Carns1	cellular amino acid biosynthetic process	0.64164
GO:0010171	2.90124	0.0996725	28	3	Col1a1,Twist2,Tfap2a	body morphogenesis	0.64164
GO:0030203	2.90124	0.0996725	28	3	Dcn,Bgn,B3galt6	glycosaminoglycan metabolic process	0.64164
GO:0040017	1.95841	0.102407	94	7	Zp3,Tfap2a,Cyr61,Tmsb4x,Trim32,Elp6,Cxcl12	positive regulation of locomotion	0.64164
GO:0051272	1.95841	0.102407	94	7	Zp3,Tfap2a,Cyr61,Tmsb4x,Trim32,Elp6,Cxcl12	positive regulation of cellular component movement	0.64164
GO:0009262	4.02063	0.105933	14	2	Nt5c,Pnp	deoxyribonucleotide metabolic process	0.64164
GO:0010717	4.02063	0.105933	14	2	Hpn,Tgfbr3	regulation of epithelial to mesenchymal transition	0.64164
GO:0042058	4.02063	0.105933	14	2	Tfap2a,Epgn	regulation of epidermal growth factor receptor signaling pathway	0.64164
GO:0048147	4.02063	0.105933	14	2	Trim32,Dach1	negative regulation of fibroblast proliferation	0.64164
GO:0050709	4.02063	0.105933	14	2	Srgn,Dph3	negative regulation of protein secretion	0.64164
GO:0060713	4.02063	0.105933	14	2	Cyr61,Adm	labyrinthine layer morphogenesis	0.64164
GO:0060977	4.02063	0.105933	14	2	Tgfbr3,Epo	coronary vasculature morphogenesis	0.64164
GO:0061384	4.02063	0.105933	14	2	Adamts1,Tgfbr3	heart trabecula morphogenesis	0.64164
GO:0070232	4.02063	0.105933	14	2	Wnt5a,Serpinb9	regulation of T cell apoptotic process	0.64164
GO:0050954	2.09051	0.106594	63	5	Hpn,Tfap2a,Myo1a,Whrn,Adgrv1	sensory perception of mechanical stimulus	0.64164
GO:0009612	2.78918	0.108048	29	3	Hpn,Col1a1,Adgrv1	response to mechanical stimulus	0.64164
GO:0042158	2.78918	0.108048	29	3	Pigt,Piga,Mppe1	lipoprotein biosynthetic process	0.64164
GO:0050679	2.30603	0.110773	46	4	Hpn,Twist2,Wnt5a,Epgn	positive regulation of epithelial cell proliferation	0.647647
GO:0048839	1.89211	0.111211	97	7	Hpn,Phox2b,Tfap2a,Wnt5a,Hoxa1,Whrn,Adgrv1	inner ear development	0.647647
GO:0001763	1.7561	0.114111	134	9	Ccl11,Ptch1,Wnt5a,Sema3c,Adm,Ednra,Col13a1,Cxcl12,Hhip	morphogenesis of a branching structure	0.647647
GO:0007585	2.68543	0.116687	30	3	Phox2b,Ednra,Dach1	respiratory gaseous exchange	0.647647
GO:0008543	2.68543	0.116687	30	3	Wnt5a,Klb,Hhip	fibroblast growth factor receptor signaling pathway	0.647647
GO:0035264	1.85033	0.117699	99	7	Unc79,Ptch1,Cela1,Adrb3,Bbs2,Heg1,Zfx	multicellular organism growth	0.647647
GO:0006635	3.71042	0.119127	15	2	Bdh2,Decr1	fatty acid beta-oxidation	0.647647
GO:0008045	3.71042	0.119127	15	2	Hoxa1,Cxcl12	motor neuron axon guidance	0.647647
GO:0014003	3.71042	0.119127	15	2	Id4,Nkx6-2	oligodendrocyte development	0.647647
GO:0015992	3.71042	0.119127	15	2	Slc11a2,Atp6v0b	proton transport	0.647647
GO:0035335	3.71042	0.119127	15	2	Dusp14,Ptprr	peptidyl-tyrosine dephosphorylation	0.647647
GO:0072210	3.71042	0.119127	15	2	Tfap2a,Kif26b	metanephric nephron development	0.647647
GO:0007600	1.71398	0.121156	137	9	Hpn,Tfap2a,Myo1a,Whrn,Gjb4,Pkd1l3,Olfr330,Adgrv1,Omp	sensory perception	0.654071
GO:0007292	2.2004	0.124389	48	4	Zp3,Adamts1,Oas1d,Zfx	female gamete generation	0.656383
GO:0044344	2.58925	0.125575	31	3	Wnt5a,Klb,Hhip	cellular response to fibroblast growth factor stimulus	0.656383
GO:0045444	1.79081	0.128322	102	7	Runx1t1,Ttc8,Id4,Adrb3,Bbs2,Ctbp1,Trim32	fat cell differentiation	0.656383
GO:0007189	3.44513	0.1327	16	2	Calcr,Adrb3	adenylate cyclase-activating G-protein coupled receptor signaling pathway	0.656383
GO:0009593	3.44513	0.1327	16	2	Pkd1l3,Olfr330	detection of chemical stimulus	0.656383
GO:0015698	3.44513	0.1327	16	2	Slc13a1,Ano1	inorganic anion transport	0.656383
GO:0042310	3.44513	0.1327	16	2	Ednra,Adra1b	vasoconstriction	0.656383
GO:0043149	3.44513	0.1327	16	2	Eln,Arhgef15	stress fiber assembly	0.656383
GO:0048596	3.44513	0.1327	16	2	Tfap2a,Cryaa	embryonic camera-type eye morphogenesis	0.656383
GO:0050974	3.44513	0.1327	16	2	Hpn,Adgrv1	detection of mechanical stimulus involved in sensory perception	0.656383
GO:0003151	2.49931	0.134699	32	3	Tfap2a,Wnt5a,Sema3c	outflow tract morphogenesis	0.656383
GO:0031016	2.49931	0.134699	32	3	Wnt5a,Cela1,Nkx6-2	pancreas development	0.656383
GO:0001666	2.10377	0.138676	50	4	Cryaa,Epo,Ednra,Loxl2	response to hypoxia	0.656383
GO:0008585	2.10377	0.138676	50	4	Zp3,Adamts1,Oas1d,Zfx	female gonad development	0.656383
GO:0050708	2.10377	0.138676	50	4	Srgn,Dph3,Wnt5a,Il1rl1	regulation of protein secretion	0.656383
GO:0022612	1.91681	0.143584	82	6	Ccl11,Ptch1,Wnt5a,Tnc,Sema3c,Slit2	gland morphogenesis	0.656383
GO:0045834	2.41563	0.144045	33	3	Zp3,Aadac,Cyr61	positive regulation of lipid metabolic process	0.656383
GO:0050707	2.41563	0.144045	33	3	Srgn,Wnt5a,Il1rl1	regulation of cytokine secretion	0.656383
GO:0055008	2.41563	0.144045	33	3	Wnt5a,Tgfbr3,Epo	cardiac muscle tissue morphogenesis	0.656383
[truncated: 610 more rows]

## Sheet: component 10 negative
	odds.ratio	p.value	n.categoy	n.category.and.component	genes	description	FDR
[truncated: 500 more rows]

[truncated: 32 more sheets: component 11 negative, component 12 negative, component 14 negative, component 18 negative, component 22 negative, component 23 negative, component 25 negative, component 28 negative, component 29 negative, component 30 negative, component 31 negative, component 34 negative, component 1 positive, component 2 positive, component 4 positive, component 5 positive, component 6 positive, component 7 positive, component 8 positive, component 10 positive …]
