# Supplementary material for: Single cell RNA-seq identifies the origins of heterogeneity in efficient cell transdifferentiation and reprogramming
Source: eLife. 2019 Mar 12;8:e41627. doi: 10.7554/eLife.41627 (PMC6435319; doi:10.7554/eLife.41627)
Supplement: Supplementary file 4. — It includes odds ratio, p-value and FDR, number of genes included in each category, number and names of genes included both in the cluster and in the category. [file elife-41627-supp4.xlsx]

## Sheet: component 1 negative
	odds.ratio	p.value	n.categoy	n.category.and.component	genes	FDR
HALLMARK_INFLAMMATORY_RESPONSE	4.36885	6.04846e-09	146	28	Axl,Lcp2,Ebi3,Cybb,Ahr,Atp2b1,Ifngr2,Ifnar1,Msr1,Irf7,Pdpn,Tnfrsf1b,P2rx4,Clec5a,Aqp9,Ccl7,Ccl2,Il18,C3ar1,Stab1,Tlr1,Fpr1,C5ar1,Gpr183,Cd14,Ptafr,Kif1b,Slc31a1	1.81454e-07
HALLMARK_COMPLEMENT	4.11661	3.07887e-08	147	27	Lcp2,Cd36,Ctsd,Dusp6,Plek,Lgmn,Ctsb,Pla2g7,Lipa,Irf7,F5,Anxa5,Ctso,Itgam,Adam9,Irf2,Ctsh,Dock4,C1qa,C1qc,Ctss,Lrp1,Gng2,Mmp12,Mmp13,Fcer1g,Serpinb2	4.6183e-07
HALLMARK_COAGULATION	4.08954	8.90545e-06	90	17	Apoc2,Sirt2,Dusp6,Plek,Lgmn,Arf4,Ctsb,Pros1,Ctso,Pf4,Adam9,Ctsh,C1qa,Lrp1,S100a1,Gda,Serpinb2	8.90545e-05
HALLMARK_IL6_JAK_STAT3_SIGNALING	4.1903	4.05978e-05	72	14	Acvrl1,Cd36,Ebi3,Hmox1,Ifngr1,Ifngr2,Ifnar1,Il10rb,Tnfrsf1b,Pf4,Tnfrsf1a,Il2rg,Ccl7,Cd14	0.000304483
HALLMARK_KRAS_SIGNALING_UP	2.74281	0.000360492	148	20	Itgb2,Dusp6,Atg10,Vwa5a,Adam8,Nrp1,Laptm5,Tnfrsf1b,Fuca1,Spp1,Gpnmb,Il2rg,Trib1,Ctss,F13a1,C3ar1,Adam17,Kcnn4,Fcer1g,Mafb	0.00216295
HALLMARK_XENOBIOTIC_METABOLISM	2.38373	0.00193022	149	18	Comt,Acp2,Cd36,Apoe,Hmox1,Igf1,Abcc3,Pros1,Npc1,Cndp2,Idh1,Smox,Slc6a6,Tnfrsf1a,Aqp9,Elovl5,Ninj1,Blvrb	0.00965112
HALLMARK_ALLOGRAFT_REJECTION	2.23894	0.00551218	148	17	Itgb2,Lcp2,Ccl4,Ifngr1,Ifngr2,Irf7,Cd2,Pf4,Il2rg,Ccl7,Ccl2,Ctss,Gcnt1,Il18,Stab1,Tlr1,Ccr5	0.023088
HALLMARK_TNFA_SIGNALING_VIA_NFKB	2.13646	0.00615679	173	19	Cd83,Sdc4,Ccl4,Atp2b1,Plek,Fos,Litaf,Ifngr2,Sat1,Serpinb8,Atf3,Trib1,Ccl2,Ninj1,Il18,Gpr183,Serpinb2,Ccnd1,Cebpd	0.023088
HALLMARK_ANGIOGENESIS	3.98945	0.014393	26	5	Lpl,App,Nrp1,Spp1,Pf4	0.0479765
HALLMARK_P53_PATHWAY	1.7368	0.0481806	184	17	Hmox1,Ctsd,Rxra,Fos,App,Vwa5a,Sat1,Atf3,Ralgds,Zmat3,Fuca1,Cebpa,Hist1h1c,Plxnb2,Rap2b,Ninj1,Tprkb	0.144542
HALLMARK_CHOLESTEROL_HOMEOSTASIS	2.13296	0.0868502	62	7	Lpl,Cxcl16,Lgmn,Gusb,Atf3,Fabp5,Anxa5	0.236864
HALLMARK_HYPOXIA	1.53265	0.169729	168	14	Ugp2,Hmox1,Sdc4,Fos,Hexa,Sdc3,Atf3,Plin2,Tpst2,Slc6a6,Nagk,Ids,Siah2,Bcl2	0.394518
HALLMARK_IL2_STAT5_SIGNALING	1.52228	0.170958	169	14	Cd83,Ahr,Smpdl3a,Ifngr1,Nrp1,Plin2,Tnfrsf1b,Spp1,P2rx4,Anxa4,S100a1,Penk,Cdc42se2,Bcl2	0.394518
HALLMARK_PROTEIN_SECRETION	1.59031	0.248318	92	8	Ap2s1,Stx7,Cd63,Rps6ka3,Snx2,Sgms1,Cltc,Kif1b	0.508339
HALLMARK_PANCREAS_BETA_CELLS	2.20526	0.25417	17	2	Lmo2,Mafb	0.508339
HALLMARK_ESTROGEN_RESPONSE_LATE	1.38453	0.289617	157	12	Fos,Aldh3b1,Nab2,Fabp5,Jak1,Elovl5,Siah2,Ptger3,Blvrb,Myof,Bcl2,Ccnd1	0.543032
HALLMARK_UV_RESPONSE_UP	1.41491	0.328038	128	10	Atp6v1f,Hmox1,Prkaca,Ap2s1,Fos,Atf3,Sigmar1,Creg1,Sepw1,Arrb2	0.552539
HALLMARK_BILE_ACID_METABOLISM	1.5339	0.331523	83	7	Rxra,Npc1,Hsd17b4,Idh1,Bcar3,Aqp9,Ch25h	0.552539
HALLMARK_ANDROGEN_RESPONSE	1.41909	0.352863	89	7	Mertk,Sat1,Rps6ka3,Elovl5,Maf,Sepp1,Ccnd1	0.557152
HALLMARK_ADIPOGENESIS	1.30018	0.407563	180	13	Agpat3,Cd36,Apoe,Lpl,Ifngr1,Dnajc15,Itsn1,Idh1,Crat,Plin2,Cmpk1,Ptger3,Fabp4	0.611344
HALLMARK_APOPTOSIS	1.27955	0.455371	140	10	Hmox1,Ifngr1,App,Sat1,Atf3,Cd2,Il18,Cd14,Rnasel,Ccnd1	0.65053
HALLMARK_PI3K_AKT_MTOR_SIGNALING	1.27525	0.50606	98	7	Dusp3,Sla,Mknk1,Tnfrsf1a,Il2rg,Rps6ka3,Cltc	0.690082
HALLMARK_FATTY_ACID_METABOLISM	1.09154	0.702518	129	8	Blvra,Cd36,Serinc1,Hsd17b4,Idh1,Crat,Elovl5,Lgals1	0.812892
HALLMARK_APICAL_SURFACE	1.09795	0.705359	32	2	App,Il2rg	0.812892
HALLMARK_EPITHELIAL_MESENCHYMAL_TRANSITION	1.14184	0.722091	155	10	Sdc4,Pmp22,Pdlim4,Dab2,Sat1,Fuca1,Spp1,Anpep,Lrp1,Lgals1	0.812892
HALLMARK_HEME_METABOLISM	1.08684	0.730097	162	10	Blvra,Atp6v0a1,Ctsb,March8,Smox,Sdcbp,Tmem9b,Lmo2,Blvrb,Mfhas1	0.812892
HALLMARK_INTERFERON_GAMMA_RESPONSE	1.07946	0.731603	163	10	Lcp2,Dhx58,Irf7,Irf2,Lgals3bp,Ccl7,Ccl2,Isg15,Fpr1,St3gal5	0.812892
HALLMARK_TGF_BETA_SIGNALING	1.02889	0.766953	51	3	Rhoa,Ifngr2,Bcar3	0.821735
HALLMARK_INTERFERON_ALPHA_RESPONSE	1.04254	0.813086	84	5	Dhx58,Irf7,Irf2,Lgals3bp,Isg15	0.841123
HALLMARK_UV_RESPONSE_DN	1.08225	0.846422	130	8	Rxra,Pmp22,Atp2b1,Dab2,Nrp1,Anxa4,Tgfbr2,Gcnt1	0.846422

## Sheet: component 2 negative
	odds.ratio	p.value	n.categoy	n.category.and.component	genes	FDR
HALLMARK_DNA_REPAIR	2.8302	0.001809	134	13	Bcap31,Gtf2h1,Rnmt,Polr2i,Dctn4,Prim1,Clp1,Nudt9,Pole4,Pold3,Snapc5,Polr1c,Polr2g	0.0307529
HALLMARK_FATTY_ACID_METABOLISM	2.16298	0.0323532	129	10	Gcdh,Acot8,Pdhb,Sucla2,Cpox,Gpd2,Ube2l6,Pdha1,Acadm,Ccdc58	0.275002
HALLMARK_ANDROGEN_RESPONSE	2.17082	0.0840417	89	7	Rab4a,Sgk1,Hsd17b14,Cdc14b,Akap12,Gpd1l,Zbtb10	0.427704
HALLMARK_WNT_BETA_CATENIN_SIGNALING	2.89436	0.100636	29	3	Hdac2,Rbpj,Skp2	0.427704
HALLMARK_UV_RESPONSE_UP	1.68909	0.158787	128	8	Sod2,Slc6a8,Atp6v1c1,Cdc5l,Cyb5r1,Dnaja1,Grpel1,Ppat	0.483652
HALLMARK_PROTEIN_SECRETION	1.75873	0.170701	92	6	Rab5a,Tom1l1,Snap23,Scamp3,Clta,Uso1	0.483652
HALLMARK_NOTCH_SIGNALING	1.99295	0.282612	27	2	Sap30,Fzd5	0.686343
HALLMARK_SPERMATOGENESIS	1.50853	0.391718	88	5	Ace,Pias2,Agfg1,Coil,Csnk2a2	0.737665
HALLMARK_MTORC1_SIGNALING	1.26082	0.441399	188	9	Gtf2h1,Psmc6,Sec11a,Cth,Uso1,Bcat1,Ebp,Polr3g,Eif2s2	0.737665
HALLMARK_PANCREAS_BETA_CELLS	1.54983	0.490976	17	1	Sec11a	0.737665
HALLMARK_BILE_ACID_METABOLISM	1.26002	0.563535	83	4	Pex12,Pex7,Tfcp2l1,Slc23a2	0.737665
HALLMARK_PEROXISOME	1.26002	0.563535	83	4	Sod2,Acot8,Slc23a2,Ctps	0.737665
HALLMARK_E2F_TARGETS	1.21766	0.564097	194	9	Cse1l,Trip13,Ctps,Chek2,Pole4,Pold3,Prps1,Gins4,Melk	0.737665
HALLMARK_UNFOLDED_PROTEIN_RESPONSE	1.19639	0.613909	109	5	Nfyb,Pdia5,Sec11a,Exosc9,Eif4ebp1	0.745461
HALLMARK_REACTIVE_OXIGEN_SPECIES_PATHWAY	1.18054	0.68838	44	2	Sod2,Oxsr1	0.780165
HALLMARK_ESTROGEN_RESPONSE_EARLY	1.0657	0.83789	170	7	Syngr1,Asb13,Ovol2,Fam63a,Gja1,Reep1,Itpk1	0.846224
HALLMARK_OXIDATIVE_PHOSPHORYLATION	1.0864	0.846224	191	8	Pdhb,Sucla2,Atp6v1c1,Mrpl11,Grpel1,Pdha1,Uqcrfs1,Acadm	0.846224

## Sheet: component 4 negative
	odds.ratio	p.value	n.categoy	n.category.and.component	genes	FDR
HALLMARK_INTERFERON_ALPHA_RESPONSE	5.26882	0.0252693	84	3	Parp14,Ifi44l,Ifi27	0.286026
HALLMARK_INTERFERON_GAMMA_RESPONSE	3.65073	0.0336501	163	4	Parp14,Slamf7,Ifi44l,Ifi27	0.286026
HALLMARK_COMPLEMENT	2.91086	0.100177	147	3	Pdgfb,Dyrk2,Cdh13	0.510571
HALLMARK_PANCREAS_BETA_CELLS	8.35592	0.122761	17	1	Pcsk2	0.510571
HALLMARK_COAGULATION	3.09914	0.150168	90	2	Pdgfb,Mmp11	0.510571
HALLMARK_FATTY_ACID_METABOLISM	2.12344	0.259555	129	2	Aldh3a2,Aoc3	0.648474
HALLMARK_ALLOGRAFT_REJECTION	1.83675	0.314276	148	2	Il2ra,Trat1	0.648474
HALLMARK_KRAS_SIGNALING_UP	1.83675	0.314276	148	2	Mmp11,Btbd3	0.648474
HALLMARK_IL2_STAT5_SIGNALING	1.59589	0.373965	169	2	Il2ra,Galm	0.648474
HALLMARK_IL6_JAK_STAT3_SIGNALING	1.8566	0.428291	72	1	Il2ra	0.648474
HALLMARK_PEROXISOME	1.60243	0.47564	83	1	Cnbp	0.648474
HALLMARK_KRAS_SIGNALING_DN	1.52613	0.491902	87	1	Ifi44l	0.648474
HALLMARK_SPERMATOGENESIS	1.50816	0.495892	88	1	Papolb	0.648474
HALLMARK_ADIPOGENESIS	1.49236	0.646216	180	2	Sncg,Fam73b	0.736065
HALLMARK_P53_PATHWAY	1.45782	0.649469	184	2	Fgf13,Cdh13	0.736065
HALLMARK_UV_RESPONSE_UP	1.0212	1	128	1	Spr	1
HALLMARK_UV_RESPONSE_DN	1.00477	1	130	1	Mios	1

## Sheet: component 5 negative
	odds.ratio	p.value	n.categoy	n.category.and.component	genes	FDR
HALLMARK_INTERFERON_ALPHA_RESPONSE	3.26369	0.00354723	84	9	Adar,Il15,Isg20,Trim14,Trafd1,Ifit2,Cd47,Tmem140,Trim5	0.0780392
HALLMARK_KRAS_SIGNALING_DN	2.72883	0.0145069	87	8	Clstn3,Ypel1,Cyp39a1,Brdt,Capn9,Pdk2,Tg,Zbtb16	0.159576
HALLMARK_HYPOXIA	2.09313	0.0323209	168	12	Cp,B4galnt2,Stc2,Gcnt2,Rragd,Errfi1,Gpc4,Pygm,Isg20,Ndst2,Maff,Selenbp1	0.182081
HALLMARK_BILE_ACID_METABOLISM	2.46432	0.0331056	83	7	Pex6,Gnmt,Soat2,Cyp39a1,Slc23a1,Hsd17b6,Pex11a	0.182081
HALLMARK_INTERFERON_GAMMA_RESPONSE	1.95527	0.0516837	163	11	Cd86,Adar,Cd38,Il15,Myd88,P2ry14,Isg20,Trim14,Trafd1,Ifit2,Vamp8	0.227408
HALLMARK_MYOGENESIS	1.82328	0.105395	141	9	Tpd52l1,Stc2,Mylk,Casq2,Rit1,Mapre3,Tagln,Dapk2,Pygm	0.360668
HALLMARK_XENOBIOTIC_METABOLISM	1.71483	0.122015	149	9	Tat,Gnmt,Ndrg2,Gcnt2,Pink1,Slc46a3,Pts,Vnn1,Ptges	0.360668
HALLMARK_GLYCOLYSIS	1.64903	0.144262	172	10	Homer1,Nol3,Stc2,Pfkfb1,Chst1,Rragd,Gpc4,Chst4,Isg20,Hs6st2	0.360668
HALLMARK_COAGULATION	1.89158	0.147546	90	6	Vwf,Msrb2,Pef1,Casp9,S100a13,Maff	0.360668
HALLMARK_HEME_METABOLISM	1.56291	0.199693	162	9	Foxj2,Ctns,Xk,Dcaf11,Cir1,Ccdc28a,Selenbp1,Atg4a,Gypc	0.439325
HALLMARK_APOPTOSIS	1.60751	0.24668	140	8	Aifm3,Xiap,Bcl10,Casp9,Cd38,Isg20,Bmf,F2r	0.49336
HALLMARK_SPERMATOGENESIS	1.58321	0.381075	88	5	Tulp2,Nphp1,Phkg2,Camk4,Acrbp	0.698638
HALLMARK_PANCREAS_BETA_CELLS	1.62422	0.4754	17	1	Vdr	0.78706
HALLMARK_ALLOGRAFT_REJECTION	1.30268	0.500856	148	7	Il16,Cd86,Cd4,Bcl10,Il15,F2r,Cd47	0.78706
HALLMARK_P53_PATHWAY	1.18951	0.551466	184	8	Tpd52l1,Vdr,Steap3,Trafd1,F2r,Vamp8,Zbtb16,Osgin1	0.808818
HALLMARK_HEDGEHOG_SIGNALING	1.0804	0.613184	25	1	Amot	0.821865
HALLMARK_REACTIVE_OXIGEN_SPECIES_PATHWAY	1.23764	0.678327	44	2	Stk25,Ipcef1	0.821865
HALLMARK_IL6_JAK_STAT3_SIGNALING	1.12971	0.749307	72	3	Csf3r,Cd38,Myd88	0.821865
HALLMARK_PROTEIN_SECRETION	1.18355	0.776001	92	4	Cav2,Sh3gl2,Vamp3,Tspan8	0.821865
HALLMARK_PI3K_AKT_MTOR_SIGNALING	1.10601	0.784034	98	4	Rit1,Myd88,Vav3,Camk4	0.821865
HALLMARK_UV_RESPONSE_DN	1.0381	0.814183	130	5	Amph,Arhgef9,Pias3,Cdon,Dbp	0.821865
HALLMARK_COMPLEMENT	1.1077	0.821865	147	6	Cp,Notch4,Gata3,Casp9,S100a13,Maff	0.821865

## Sheet: component 6 negative
	odds.ratio	p.value	n.categoy	n.category.and.component	genes	FDR
HALLMARK_NOTCH_SIGNALING	8.43559	0.00765996	27	3	Fbxw11,Kat2a,Dtx4	0.191499
HALLMARK_PROTEIN_SECRETION	3.07466	0.050952	92	4	Vps45,Scamp1,Ap2m1,Arcn1	0.510268
HALLMARK_APOPTOSIS	2.5212	0.0612321	140	5	Timp2,Gpx3,Diablo,Casp4,Rhob	0.510268
HALLMARK_BILE_ACID_METABOLISM	2.49328	0.132972	83	3	Paox,Lonp2,Abcd2	0.613186
HALLMARK_PEROXISOME	2.49328	0.132972	83	3	Smarcc1,Lonp2,Abcd2	0.613186
HALLMARK_KRAS_SIGNALING_DN	2.37165	0.147165	87	3	Cdkal1,Rsad2,Sidt1	0.613186
HALLMARK_PI3K_AKT_MTOR_SIGNALING	2.0904	0.188528	98	3	Raf1,Ap2m1,Arpc3	0.673316
HALLMARK_INTERFERON_GAMMA_RESPONSE	1.66661	0.314181	163	4	Cmpk2,Rsad2,Oas3,Casp4	0.674877
HALLMARK_HEDGEHOG_SIGNALING	2.70931	0.321019	25	1	Nrp2	0.674877
HALLMARK_ADIPOGENESIS	1.49796	0.354181	180	4	Uck1,Ubqln1,Gpx3,Pfkfb3	0.674877
HALLMARK_WNT_BETA_CATENIN_SIGNALING	2.31989	0.361967	29	1	Kat2a	0.674877
HALLMARK_INTERFERON_ALPHA_RESPONSE	1.58978	0.370314	84	2	Cmpk2,Rsad2	0.674877
HALLMARK_APICAL_SURFACE	2.09371	0.391079	32	1	Crocc	0.674877
HALLMARK_ANDROGEN_RESPONSE	1.49623	0.397867	89	2	Hmgcr,Sms	0.674877
HALLMARK_UV_RESPONSE_UP	1.57479	0.445872	128	3	Prpf3,Gpx3,Rhob	0.674877
HALLMARK_COMPLEMENT	1.35933	0.491376	147	3	Raf1,Timp2,Casp4	0.674877
HALLMARK_REACTIVE_OXIGEN_SPECIES_PATHWAY	1.50436	0.495038	44	1	Gpx3	0.674877
HALLMARK_XENOBIOTIC_METABOLISM	1.33992	0.496661	149	3	Pdk4,Sar1b,Abcd2	0.674877
HALLMARK_EPITHELIAL_MESENCHYMAL_TRANSITION	1.28473	0.512906	155	3	Htra1,Cdh11,Rhob	0.674877
HALLMARK_TGF_BETA_SIGNALING	1.29121	0.547413	51	1	Fnta	0.684267
HALLMARK_CHOLESTEROL_HOMEOSTASIS	1.05507	0.619133	62	1	Hmgcr	0.737063
HALLMARK_HEME_METABOLISM	1.2256	0.736772	162	3	Hagh,Nek7,Psmd9	0.825043
HALLMARK_P53_PATHWAY	1.06956	0.759039	184	3	Apaf1,Ppm1d,Kif13b	0.825043
HALLMARK_FATTY_ACID_METABOLISM	1.01302	1	129	2	Metap1,Sms	1
HALLMARK_UV_RESPONSE_DN	1.00481	1	130	2	Ltbp1,Nek7	1

## Sheet: component 7 negative
	odds.ratio	p.value	n.categoy	n.category.and.component	genes	FDR
HALLMARK_P53_PATHWAY	3.07059	0.0551204	184	4	Hint1,Hspa4l,Rrad,Pitpnc1	0.557068
HALLMARK_UV_RESPONSE_UP	3.23617	0.0791508	128	3	Nr4a1,Aldoa,Rrad	0.557068
HALLMARK_APOPTOSIS	2.94243	0.0974849	140	3	Anxa1,Il1b,Gpx1	0.557068
HALLMARK_ESTROGEN_RESPONSE_LATE	2.60441	0.126165	157	3	Cxcl14,Hspa4l,Nrip1	0.557068
HALLMARK_HYPOXIA	2.42308	0.146218	168	3	Aldoa,Anxa2,Fbp1	0.557068
HALLMARK_COAGULATION	2.97916	0.159162	90	2	Rac1,Anxa1	0.557068
HALLMARK_FATTY_ACID_METABOLISM	2.04122	0.27332	129	2	Aldoa,Reep6	0.588067
HALLMARK_INFLAMMATORY_RESPONSE	1.79128	0.324012	146	2	Il1b,Lamp3	0.588067
HALLMARK_COMPLEMENT	1.7784	0.326979	147	2	L3mbtl4,Pdp1	0.588067
HALLMARK_ALLOGRAFT_REJECTION	1.7657	0.329943	148	2	Il1b,Il12a	0.588067
HALLMARK_KRAS_SIGNALING_UP	1.7657	0.329943	148	2	Slpi,Il1b	0.588067
HALLMARK_TGF_BETA_SIGNALING	2.55282	0.336038	51	1	Ski	0.588067
HALLMARK_HEME_METABOLISM	1.60452	0.371084	162	2	Klf3,Nfe2	0.599443
HALLMARK_IL6_JAK_STAT3_SIGNALING	1.78727	0.440055	72	1	Il1b	0.660083
HALLMARK_INTERFERON_ALPHA_RESPONSE	1.52362	0.492241	84	1	Lamp3	0.665113
HALLMARK_SPERMATOGENESIS	1.4519	0.50857	88	1	Hspa4l	0.665113
HALLMARK_PI3K_AKT_MTOR_SIGNALING	1.29848	0.547207	98	1	Rac1	0.665113
HALLMARK_UNFOLDED_PROTEIN_RESPONSE	1.1625	0.586323	109	1	Tatdn2	0.665113
HALLMARK_TNFA_SIGNALING_VIA_NFKB	1.4964	0.64592	173	2	Nr4a1,Il1b	0.665113
HALLMARK_ADIPOGENESIS	1.43456	0.651882	180	2	Aldoa,Reep6	0.665113
HALLMARK_MITOTIC_SPINDLE	1.3244	0.665113	194	2	Arhgap27,Lats1	0.665113

## Sheet: component 8 negative
	odds.ratio	p.value	n.categoy	n.category.and.component	genes	FDR
HALLMARK_EPITHELIAL_MESENCHYMAL_TRANSITION	6.3485	3.93937e-12	155	28	Timp1,Col1a1,Col5a3,Pcolce2,Dcn,Timp3,Thbs2,Lox,Col5a2,Col3a1,Vim,Col5a1,Fbn1,Postn,Ptx3,Cyr61,Tnc,Tgfbr3,Col1a2,Eln,Bgn,Slit2,Loxl2,Col6a3,Adam12,Cxcl12,Tnfrsf11b,Fbln2	1.10302e-10
HALLMARK_COAGULATION	3.1519	0.00280133	90	10	Timp1,Hpn,Dusp14,Timp3,Iscu,Fbn1,Ctsk,F8,Prss23,Cfb	0.0392186
HALLMARK_ANGIOGENESIS	4.4597	0.0184601	26	4	Timp1,Col5a2,Col3a1,Postn	0.172294
HALLMARK_XENOBIOTIC_METABOLISM	1.9904	0.0493245	149	11	Crot,Aldh3a1,Il1r1,Kynu,Ssr3,Atp2a2,Slc6a12,Hsd17b2,Ap4b1,Adh7,Cfb	0.345272
HALLMARK_HYPOXIA	1.73939	0.101767	168	11	Dcn,Sdc2,Lox,Col5a1,Cyr61,Adm,Bgn,Tpbg,Prkcdbp,B3galt6,Srpx	0.569894
HALLMARK_PEROXISOME	1.90894	0.145191	83	6	Fis1,Pex13,Sema3c,Slc25a4,Ctbp1,Idi1	0.59503
HALLMARK_INTERFERON_ALPHA_RESPONSE	1.88393	0.148758	84	6	Mx1,Procr,Ifi44,Plscr1,Cxcl10,B2m	0.59503
HALLMARK_INFLAMMATORY_RESPONSE	1.61618	0.189566	146	9	Timp1,Hpn,Slc11a2,Il1r1,Rgs1,Atp2a2,Adm,Cxcl10,Tpbg	0.602967
HALLMARK_KRAS_SIGNALING_UP	1.59195	0.193811	148	9	Crot,Ptprr,Plek2,Cdadc1,Usp12,Ano1,Cxcl10,Pcsk1n,Cfb	0.602967
HALLMARK_UV_RESPONSE_DN	1.6085	0.24656	130	8	Col1a1,Sdc2,Col5a2,Col3a1,Atp2b4,Cyr61,Tgfbr3,Col1a2	0.672072
HALLMARK_HEDGEHOG_SIGNALING	2.1025	0.264028	25	2	Ptch1,Crmp1	0.672072
HALLMARK_CHOLESTEROL_HOMEOSTASIS	1.67449	0.312464	62	4	Mal2,Plscr1,Lss,Idi1	0.70717
HALLMARK_APICAL_SURFACE	1.60883	0.368353	32	2	Ephb4,Srpx	0.70717
HALLMARK_BILE_ACID_METABOLISM	1.55847	0.384101	83	5	Crot,Pex13,Abca9,Abca6,Idi1	0.70717
HALLMARK_ALLOGRAFT_REJECTION	1.39404	0.385908	148	8	Il12rb1,Timp1,Cd247,Srgn,Ccl11,Mrpl3,Tlr6,B2m	0.70717
HALLMARK_ANDROGEN_RESPONSE	1.44457	0.404097	89	5	Srp19,Adamts1,Homer2,Idi1,B2m	0.70717
HALLMARK_IL6_JAK_STAT3_SIGNALING	1.42403	0.533429	72	4	Il12rb1,Il1r1,Cxcl10,Lepr	0.874468
HALLMARK_ESTROGEN_RESPONSE_LATE	1.12658	0.677705	157	7	Calcr,Homer2,Atp2b4,Tpbg,Prss23,Tst,Cxcl12	0.874468
HALLMARK_APICAL_JUNCTION	1.10345	0.683196	160	7	Adamts5,Fbn1,Actb,Slit2,Cdh8,Adra1b,Tnfrsf11b	0.874468
HALLMARK_KRAS_SIGNALING_DN	1.1615	0.777859	87	4	Mx1,Cacng1,Mfsd6,Lgals7	0.874468
HALLMARK_APOPTOSIS	1.07822	0.824464	140	6	Timp1,Dcn,Timp3,Ppp2r5b,Tgfbr3,Bgn	0.874468
HALLMARK_MYOGENESIS	1.06997	0.82532	141	6	Col1a1,Cacng1,Col3a1,Atp2a1,Col6a3,Adam12	0.874468
HALLMARK_COMPLEMENT	1.02254	0.831312	147	6	Timp1,Rce1,Kynu,F8,Plscr1,Cfb	0.874468
HALLMARK_INTERFERON_GAMMA_RESPONSE	1.08122	0.836546	163	7	Mx1,Pnp,Ifi44,Plscr1,Cxcl10,B2m,Cfb	0.874468
HALLMARK_IL2_STAT5_SIGNALING	1.03929	0.840706	169	7	Ptch1,Pnp,Spry4,Pus1,Plscr1,Cxcl10,Ptrh2	0.874468
HALLMARK_ESTROGEN_RESPONSE_EARLY	1.0326	0.841518	170	7	Sybu,Calcr,Olfml3,Tpbg,Prss23,Syt12,Cxcl12	0.874468
HALLMARK_GLYCOLYSIS	1.01945	0.843237	172	7	Dcn,Sdc2,Col5a1,Glce,Chpf,Tpbg,B3galt6	0.874468
HALLMARK_TNFA_SIGNALING_VIA_NFKB	1.01299	1	173	7	Kynu,Ptx3,Cyr61,Tnc,Cxcl10,Ier2,Tubb2a	1

## Sheet: component 10 negative
	odds.ratio	p.value	n.categoy	n.category.and.component	genes	FDR
HALLMARK_MYC_TARGETS_V1	5.81573	0.000115757	198	9	Srsf1,Xpo1,Tomm70a,Psma1,Psma4,Fam120a,Npm1,Abce1,Ptges3	0.00243089
HALLMARK_G2M_CHECKPOINT	2.80007	0.0458461	195	5	Srsf1,Xpo1,Pafah1b1,Notch2,Orc5	0.481384
HALLMARK_UNFOLDED_PROTEIN_RESPONSE	2.90075	0.0983592	109	3	Spcs1,Cnot4,Npm1	0.555183
HALLMARK_MTORC1_SIGNALING	2.24529	0.122414	188	4	Rab1a,Tfrc,Prdx1,Psma4	0.555183
HALLMARK_PANCREAS_BETA_CELLS	6.19497	0.160425	17	1	Spcs1	0.555183
HALLMARK_ALLOGRAFT_REJECTION	2.09655	0.190517	148	3	Npm1,Abce1,Rpl39	0.555183
HALLMARK_SPERMATOGENESIS	2.32747	0.226219	88	2	Cct6b,Adad1	0.555183
HALLMARK_HEME_METABOLISM	1.90409	0.227934	162	3	Kat2b,Tfrc,Bmp2k	0.555183
HALLMARK_NOTCH_SIGNALING	3.80377	0.242791	27	1	Notch2	0.555183
HALLMARK_PI3K_AKT_MTOR_SIGNALING	2.07914	0.264373	98	2	Pikfyve,Prkaa2	0.555183
HALLMARK_REACTIVE_OXIGEN_SPECIES_PATHWAY	2.28954	0.365129	44	1	Prdx1	0.592261
HALLMARK_UV_RESPONSE_UP	1.57023	0.378099	128	2	Tfrc,Gls	0.592261
HALLMARK_OXIDATIVE_PHOSPHORYLATION	1.59644	0.442506	191	3	Uqcrb,Tomm70a,Mrpl35	0.592261
HALLMARK_MITOTIC_SPINDLE	1.56994	0.446795	194	3	Pafah1b1,Sos1,Notch2	0.592261
HALLMARK_E2F_TARGETS	1.56994	0.446795	194	3	Srsf1,Xpo1,Tfrc	0.592261
HALLMARK_MYC_TARGETS_V2	1.72045	0.451246	58	1	Npm1	0.592261
HALLMARK_PEROXISOME	1.18739	0.577637	83	1	Prdx1	0.679062
HALLMARK_INTERFERON_ALPHA_RESPONSE	1.17275	0.582053	84	1	Casp1	0.679062
HALLMARK_COMPLEMENT	1.35685	0.661026	147	2	Casp1,Vcpip1	0.695368
HALLMARK_KRAS_SIGNALING_UP	1.34717	0.662255	148	2	F2rl1,Map3k1	0.695368
HALLMARK_P53_PATHWAY	1.06918	0.71196	184	2	Zfp36l1,Casp1	0.71196

## Sheet: component 11 negative
	odds.ratio	p.value	n.categoy	n.category.and.component	genes	FDR
HALLMARK_ESTROGEN_RESPONSE_EARLY	3.19297	5.16642e-07	170	31	Elf3,Fhl2,Clic3,Anxa9,Cldn7,Wwc1,Slc9a3r1,Krt19,Fdft1,Hes1,Kcnk5,Slc37a1,Flnb,Podxl,Rab17,Rasgrp1,Tfap2c,Slc2a1,Bhlhe40,Klk10,Tjp3,Inhbb,Klf10,Tgm2,Fam102a,Lad1,Krt13,Sfn,Krt8,Nav2,Esrp2	1.34327e-05
HALLMARK_ESTROGEN_RESPONSE_LATE	2.78524	3.55411e-05	157	26	Cdh1,Lsr,Mapk13,Cav1,Clic3,Anxa9,Perp,Slc9a3r1,Krt19,Fdft1,Emp2,Kcnk5,Flnb,Lamc2,Tfap2c,Gale,Cd9,Klk10,St14,Tjp3,Fam102a,Dcxr,Krt13,Sfn,Pkp3,Klk11	0.000462035
HALLMARK_MYOGENESIS	2.55886	0.00031868	141	22	Hdac5,Myo1c,Erbb3,Sparc,Igfbp3,Itgb4,Pdlim7,Clu,Itgb5,Sorbs1,Itga7,Gsn,Wwtr1,Tpm2,Nos1,Bhlhe40,Tead4,Cryab,Hrc,Foxo4,Nav2,Sptan1	0.0027619
HALLMARK_IL2_STAT5_SIGNALING	2.17141	0.00185849	169	23	Klf6,Ndrg1,Ctsz,Myo1c,Ppap2a,Plec,Twsg1,Gsto1,Itgav,Ecm1,Bhlhe40,Emp1,Cyfip1,Praf2,Myo1e,Sh3bgrl2,Nt5e,Cdcp1,Tgm2,Rnh1,Slc39a8,Hopx,Ahnak	0.0117911
HALLMARK_APICAL_JUNCTION	2.19346	0.00226751	160	22	Cdh1,Jup,Mapk13,Pvrl4,Vav2,Cldn7,Grb7,Itgb4,Cldn6,Baiap2,Adam23,Lamc2,Vasp,Parva,Cldn11,Rras,Crb3,Cldn4,Actn4,Pvrl2,Actg1,Cldn9	0.0117911
HALLMARK_CHOLESTEROL_HOMEOSTASIS	2.90905	0.00361796	62	11	Aldoc,Fdft1,Clu,Srebf2,Tnfrsf12a,Fam129a,S100a11,Cd9,Atf5,Actg1,Hmgcs1	0.0156778
HALLMARK_P53_PATHWAY	1.85445	0.0119426	184	22	Ndrg1,Perp,Itgb4,Ankra2,Pmm1,Dgka,Baiap2,Eps8l2,Prkab1,St14,Mapkapk3,Krt17,Gadd45a,Inhbb,Txnip,Ephx1,Dcxr,Phlda3,S100a10,Sfn,Jun,Klk8	0.0443581
HALLMARK_COAGULATION	2.06666	0.0334087	90	12	Crip2,Sparc,Prep,Clu,Klf7,Csrp1,Capn2,Gsn,Cd9,Capn5,Gng12,Klk8	0.108578
HALLMARK_HYPOXIA	1.72584	0.0430265	168	19	Klf6,Ptrf,Ndrg1,Cav1,Aldoc,Pfkl,Igfbp3,Dusp1,Nedd4l,Xpnpep1,Klf7,Pkp1,Efna3,Slc2a1,Fosl2,Bhlhe40,Tgm2,Jun,Ndst1	0.124299
HALLMARK_HEME_METABOLISM	1.46568	0.157915	162	16	Narf,Map2k3,Mboat2,Sec14l1,Bsg,Agpat4,Adipor1,Mgst3,Cat,Tspan5,Slc2a1,Pdzk1ip1,Daam1,Nfe2l1,Tns1,Arhgef12	0.410578
HALLMARK_APOPTOSIS	1.48285	0.176988	140	14	Cav1,Erbb3,Clu,Tnfrsf12a,Rela,Casp8,Gsn,Lmna,Emp1,Gadd45a,Txnip,Jun,Sptan1,Erbb2	0.415231
HALLMARK_EPITHELIAL_MESENCHYMAL_TRANSITION	1.42961	0.199415	155	15	Sparc,Plod1,Igfbp3,Itgb5,Tnfrsf12a,Lamc2,Itgav,Ecm1,Tpm2,Pcolce,Tpm1,Nt5e,Gadd45a,Tgm2,Jun	0.415231
HALLMARK_KRAS_SIGNALING_DN	1.53089	0.207616	87	9	Tgm1,Pkp1,Mthfr,Nos1,Alox12b,Krt13,Krt1,Lypd3,Klk8	0.415231
HALLMARK_PI3K_AKT_MTOR_SIGNALING	1.50925	0.227732	98	10	Map2k3,Actr2,Gsk3b,Gna14,Them4,Slc2a1,Pak4,Nod1,Sfn,Arf1	0.422931
HALLMARK_MITOTIC_SPINDLE	1.36643	0.247287	194	18	Abr,Sptbn1,Net1,Ralbp1,Sac3d1,Csnk1d,Flnb,Cdc42bpa,Gsn,Rfc1,Bcar1,Myo1e,Rapgef6,Cdc42ep2,Actn4,Sptan1,Arhgef12,Arfgef1	0.428631
HALLMARK_APICAL_SURFACE	1.88582	0.282014	32	4	Aim1,Afap1l2,Mal,Lypd3	0.458273
HALLMARK_GLYCOLYSIS	1.26796	0.362126	172	15	Elf3,Plod1,Igfbp3,Fbp2,Dsc2,Slc16a3,Efna3,Gale,Me1,Nt5e,Egln3,Capn5,Cldn9,Cldn3,B3gat3	0.538874
HALLMARK_TGF_BETA_SIGNALING	1.43283	0.40631	51	5	Cdh1,Sptbn1,Wwtr1,Klf10,Smurf1	0.538874
HALLMARK_ANDROGEN_RESPONSE	1.30384	0.407887	89	8	Ndrg1,Appbp2,Krt19,Ppap2a,Slc38a2,Itgav,Krt8,Hmgcs1	0.538874
HALLMARK_ANGIOGENESIS	1.71749	0.425829	26	3	Vav2,Itgav,Pglyrp1	0.538874
HALLMARK_NOTCH_SIGNALING	1.64545	0.435244	27	3	Hes1,St3gal6,Tcf7l2	0.538874
HALLMARK_UV_RESPONSE_DN	1.22094	0.48717	130	11	Sri,Cav1,Fhl2,Vav2,Synj2,Dusp1,Cdc42bpa,Bhlhe40,Mgll,Sipa1l1,Erbb2	0.575746
HALLMARK_TNFA_SIGNALING_VIA_NFKB	1.16288	0.545038	173	14	Klf6,Map2k3,Trip10,Hes1,Rcan1,Dusp1,Rela,Nfkb2,Fosl2,Bhlhe40,Gadd45a,Klf10,Ddx58,Jun	0.61613
HALLMARK_MTORC1_SIGNALING	1.05757	0.771402	188	14	M6pr,Map2k3,Actr2,Pfkl,Slc9a3r1,Srd5a1,Gsk3b,Fam129a,Slc2a1,Bhlhe40,Cd9,Me1,Egln3,Hmgcs1	0.835685
HALLMARK_PROTEIN_SECRETION	1.08137	0.835783	92	7	M6pr,Scrn1,Rab14,Tmed2,Atp1a1,Arf1,Arfgef1	0.869214
HALLMARK_ADIPOGENESIS	1.02117	0.88181	180	13	Ptrf,Ubc,Pfkl,Adcy6,Sorbs1,Itga7,Cd151,Mgst3,Cat,Coq3,Me1,Mgll,Gadd45a	0.88181

## Sheet: component 12 negative
	odds.ratio	p.value	n.categoy	n.category.and.component	genes	FDR
HALLMARK_ALLOGRAFT_REJECTION	9.22547	0.0319854	148	2	Map4k1,Rpl9	0.206713
HALLMARK_ADIPOGENESIS	7.49853	0.0459361	180	2	Acly,Acadl	0.206713
HALLMARK_FATTY_ACID_METABOLISM	4.41168	0.229816	129	1	Acadl	0.332958
HALLMARK_UV_RESPONSE_DN	4.37613	0.231403	130	1	Kalrn	0.332958
HALLMARK_KRAS_SIGNALING_UP	3.82079	0.259495	148	1	Map4k1	0.332958
HALLMARK_XENOBIOTIC_METABOLISM	3.79393	0.26103	149	1	Acp1	0.332958
HALLMARK_P53_PATHWAY	3.03665	0.313048	184	1	Rpl36	0.332958
HALLMARK_MTORC1_SIGNALING	2.96819	0.318788	188	1	Acly	0.332958
HALLMARK_MYC_TARGETS_V1	2.80918	0.332958	198	1	Acp1	0.332958

[truncated: 30 more sheets: component 14 negative, component 18 negative, component 22 negative.txt, component 23 negative, component 25 negative, component 28 negative, component 29 negative, component 30 negative, component 31 negative, component 34 negative, component 1 positive, component 2 positive, component 4 positive, component 5 positive, component 6 positive, component 7 positive, component 8 positive, component 10 positive, component 11 positive, component 12 positive …]
