# Supplementary material for: Single cell RNA-seq identifies the origins of heterogeneity in efficient cell transdifferentiation and reprogramming
Source: eLife. 2019 Mar 12;8:e41627. doi: 10.7554/eLife.41627 (PMC6435319; doi:10.7554/eLife.41627)
Supplement: Supplementary file 6. — Includes odds ratio, p-value and FDR, number of genes included in each category, number and names of genes both included both in the cluster and in the category. [file elife-41627-supp6.xlsx]

## Sheet: 6h up GO
	odds.ratio	p.value	n.categoy	n.category.and.component	genes	description	FDR
GO:0006749	28.4902	3.01623e-06	24	5	Sod2,Mgst1,G6pdx,Gsr,Alox5ap	glutathione metabolic process	0.00195753
GO:0042311	28.3343	3.06934e-05	19	4	Apoe,Sod2,G6pdx,Gpx1	vasodilation	0.00996001
GO:0006518	13.5164	7.39368e-05	45	5	Sod2,Mgst1,G6pdx,Gsr,Alox5ap	peptide metabolic process	0.015995
GO:0048147	28.45	0.000315809	14	3	Bax,Sod2,Nupr1	negative regulation of fibroblast proliferation	0.0398365
GO:0042060	7.37446	0.000327343	95	6	Cd44,Plek,Rab27a,Anxa2,F13a1,Gpx1	wound healing	0.0398365
GO:0008637	13.7056	0.000368288	35	4	Bax,Fam162a,Sod2,Slc25a4	apoptotic mitochondrial changes	0.0398365
GO:0035150	12.1295	0.000561674	39	4	Apoe,Sod2,G6pdx,Gpx1	regulation of tube size	0.0455658
GO:0050880	12.1295	0.000561674	39	4	Apoe,Sod2,G6pdx,Gpx1	regulation of blood vessel size	0.0455658
GO:0006954	4.91634	0.00110407	164	7	Apoe,Cd44,C3,Fcgr2b,Nupr1,Alox5ap,Gpx1	inflammatory response	0.0731469
GO:0009636	9.63668	0.0012433	48	4	Bax,Nupr1,Id1,Gpx1	response to toxin	0.0731469
GO:0010332	16.4788	0.00126266	22	3	Bax,Sod2,Gpx1	response to gamma radiation	0.0731469
GO:0002437	15.6546	0.00144185	23	3	C3,Fcgr2b,Gpx1	inflammatory response to antigenic stimulus	0.0731469
GO:0001836	14.9092	0.00163625	24	3	Bax,Fam162a,Sod2	release of cytochrome c from mitochondria	0.0731469
GO:0007596	8.82721	0.00167955	52	4	Plek,Rab27a,Anxa2,F13a1	blood coagulation	0.0731469
GO:0006917	6.38922	0.001801	89	5	Spi1,Bax,Itm2b,Cebpb,Gpx1	induction of apoptosis	0.0731469
GO:0007599	8.64531	0.00180331	53	4	Plek,Rab27a,Anxa2,F13a1	hemostasis	0.0731469
GO:0002526	13.0395	0.00231515	27	3	C3,Fcgr2b,Nupr1	acute inflammatory response	0.0820742
GO:0006909	7.98834	0.00236195	57	4	Rac1,C3,Fcgr2b,Lrp1	phagocytosis	0.0820742
GO:0006790	5.95715	0.00240279	95	5	Sod2,Mgst1,G6pdx,Gsr,Alox5ap	sulfur compound metabolic process	0.0820742
GO:0048066	11.5881	0.00314634	30	3	Bax,Sod2,Rab27a	developmental pigmentation	0.102099
GO:0002438	25.624	0.00417096	10	2	C3,Fcgr2b	acute inflammatory response to antigenic stimulus	0.128903
GO:0010822	22.7935	0.00506535	11	2	Bax,Fam162a	positive regulation of mitochondrion organization	0.140735
GO:0006520	4.90232	0.00527622	114	5	Sod2,Mgst1,G6pdx,Gsr,Alox5ap	cellular amino acid metabolic process	0.140735
GO:0050728	9.19295	0.00573235	37	3	Apoe,Fcgr2b,Gpx1	negative regulation of inflammatory response	0.140735
GO:0001885	20.504	0.0060397	12	2	Id1,Gpx1	endothelial cell development	0.140735
GO:0014812	20.504	0.0060397	12	2	Lrp1,Tmsb4x	muscle cell migration	0.140735
GO:0042743	20.504	0.0060397	12	2	Cybb,Gpx1	hydrogen peroxide metabolic process	0.140735
GO:0002064	6.03133	0.00607176	74	4	Rac1,Vim,Id1,Gpx1	epithelial cell development	0.140735
GO:0002920	17.0915	0.00822182	14	2	C3,Fcgr2b	regulation of humoral immune response	0.168336
GO:0006911	17.0915	0.00822182	14	2	Rac1,Fcgr2b	phagocytosis, engulfment	0.168336
GO:0032613	17.0915	0.00822182	14	2	Fcgr2b,G6pdx	interleukin-10 production	0.168336
GO:0030278	5.33614	0.00907776	83	4	Ifitm1,Id1,Cebpb,Nfe2	regulation of ossification	0.168336
GO:0010324	15.7778	0.00942641	15	2	Rac1,Fcgr2b	membrane invagination	0.168336
GO:0043277	15.7778	0.00942641	15	2	Rac1,Lrp1	apoptotic cell clearance	0.168336
GO:0048678	15.7778	0.00942641	15	2	Bax,Sod2	response to axon injury	0.168336
GO:0006970	14.6526	0.0107046	16	2	Rac1,Bax	response to osmotic stress	0.168336
GO:0010883	14.6526	0.0107046	16	2	C3,Ehd1	regulation of lipid storage	0.168336
GO:0033344	14.6526	0.0107046	16	2	Apoe,Lrp1	cholesterol efflux	0.168336
GO:0097006	14.6526	0.0107046	16	2	Apoe,Ehd1	regulation of plasma lipoprotein particle levels	0.168336
GO:2000108	14.6526	0.0107046	16	2	Bax,Anxa1	positive regulation of leukocyte apoptotic process	0.168336
GO:0002262	5.01398	0.0111054	88	4	Spi1,Bax,Anxa1,G6pdx	myeloid cell homeostasis	0.168336
GO:0006979	5.01398	0.0111054	88	4	Apoe,Sod2,G6pdx,Gpx1	response to oxidative stress	0.168336
GO:0031334	7.09419	0.0111532	47	3	Rac1,Bax,Plek	positive regulation of protein complex assembly	0.168336
GO:0048525	13.6776	0.0120549	17	2	Ifitm1,Ifitm3	negative regulation of viral reproduction	0.168966
GO:0050727	4.83868	0.0124521	91	4	Apoe,C3,Fcgr2b,Gpx1	regulation of inflammatory response	0.168966
GO:0008584	6.78173	0.0124967	49	3	Bax,Ctsl,Nupr1	male gonad development	0.168966
GO:0043473	6.78173	0.0124967	49	3	Bax,Sod2,Rab27a	pigmentation	0.168966
GO:0046546	6.78173	0.0124967	49	3	Bax,Ctsl,Nupr1	development of primary male sexual characteristics	0.168966
GO:0045667	6.63693	0.0132018	50	3	Ifitm1,Id1,Cebpb	regulation of osteoblast differentiation	0.174857
GO:0003382	12.8166	0.0134757	18	2	Rac1,Id1	epithelial cell morphogenesis	0.174915
GO:0030193	12.0618	0.0149656	19	2	Plek,Anxa2	regulation of blood coagulation	0.190445
GO:0050878	4.52186	0.0154505	97	4	Plek,Rab27a,Anxa2,F13a1	regulation of body fluid levels	0.192834
GO:0006897	3.66131	0.0162283	150	5	Rac1,C3,Ehd1,Fcgr2b,Lrp1	endocytosis	0.195266
GO:0006869	6.11249	0.0162471	54	3	Apoe,Anxa1,Lrp1	lipid transport	0.195266
GO:0040013	5.99397	0.017065	55	3	Ifitm1,Ifitm3,Lrp1	negative regulation of locomotion	0.197772
GO:0072593	5.99397	0.017065	55	3	Sod2,Cybb,Gpx1	reactive oxygen species metabolic process	0.197772
GO:0051260	5.87991	0.0179058	56	3	Bax,Mgst1,Aldoa	protein homooligomerization	0.199615
GO:0033598	10.7889	0.0181468	21	2	Bax,Cebpb	mammary gland epithelial cell proliferation	0.199615
GO:0042542	10.7889	0.0181468	21	2	Sod2,Gpx1	response to hydrogen peroxide	0.199615
GO:0010212	5.77008	0.0187693	57	3	Bax,Sod2,Gpx1	response to ionizing radiation	0.203021
GO:0045446	10.2495	0.0198352	22	2	Id1,Gpx1	endothelial cell differentiation	0.211034
GO:0046661	5.36923	0.0224525	61	3	Bax,Ctsl,Nupr1	male sex differentiation	0.233647
GO:0003158	9.31608	0.0234007	24	2	Id1,Gpx1	endothelium development	0.233647
GO:0034614	9.31608	0.0234007	24	2	Sod2,Gpx1	cellular response to reactive oxygen species	0.233647
GO:0061041	9.31608	0.0234007	24	2	Plek,Anxa2	regulation of wound healing	0.233647
GO:0055114	3.92052	0.0241157	111	4	Por,Sod2,Pygl,Gpx1	oxidation-reduction process	0.236013
GO:0015918	8.90952	0.025275	25	2	Apoe,Lrp1	sterol transport	0.236013
GO:0030301	8.90952	0.025275	25	2	Apoe,Lrp1	cholesterol transport	0.236013
GO:0048844	8.90952	0.025275	25	2	Apoe,Lrp1	artery morphogenesis	0.236013
GO:0097193	5.10134	0.0254559	64	3	Bax,Nupr1,Gpx1	intrinsic apoptotic signaling pathway	0.236013
GO:0050766	8.53728	0.0272085	26	2	C3,Fcgr2b	positive regulation of phagocytosis	0.245254
GO:0051100	8.53728	0.0272085	26	2	Bax,Id1	negative regulation of binding	0.245254
GO:0045669	8.19491	0.0292	27	2	Ifitm1,Cebpb	positive regulation of osteoblast differentiation	0.25771
GO:0007519	4.78478	0.0297816	68	3	Nupr1,Gpx1,Myl6	skeletal muscle tissue development	0.25771
GO:0060538	4.78478	0.0297816	68	3	Nupr1,Gpx1,Myl6	skeletal muscle organ development	0.25771
GO:0019915	7.87877	0.0312481	28	2	C3,Ehd1	lipid storage	0.263377
GO:0060425	7.87877	0.0312481	28	2	Ctsz,Id1	lung morphogenesis	0.263377
GO:0042632	7.58621	0.0333515	29	2	Apoe,Ehd1	cholesterol homeostasis	0.270564
GO:0060840	7.58621	0.0333515	29	2	Apoe,Lrp1	artery development	0.270564
GO:0061025	7.58621	0.0333515	29	2	Bax,Cd9	membrane fusion	0.270564
GO:0008015	3.48766	0.0343711	124	4	Apoe,Sod2,G6pdx,Gpx1	blood circulation	0.275393
GO:0055092	7.31473	0.035509	30	2	Apoe,Ehd1	sterol homeostasis	0.281041
GO:0061024	2.93096	0.0361208	185	5	Rac1,Bax,Myl12a,Fcgr2b,Cd9	membrane organization	0.282439
GO:0001101	4.37599	0.0369539	74	3	Bax,Anxa2,Cebpb	response to acid	0.285513
GO:0006959	7.06215	0.0377194	31	2	C3,Fcgr2b	humoral immune response	0.287998
GO:0043254	4.25459	0.0395253	76	3	Rac1,Bax,Plek	regulation of protein complex assembly	0.298278
GO:0040012	2.8333	0.0405904	191	5	Rac1,Ifitm1,Ifitm3,Lrp1,Tmsb4x	regulation of locomotion	0.300647
GO:0019216	4.19624	0.0408444	77	3	Rac1,Apoe,C3	regulation of lipid metabolic process	0.300647
GO:0045834	6.60318	0.0422937	33	2	Rac1,Apoe	positive regulation of lipid metabolic process	0.300647
GO:0050764	6.60318	0.0422937	33	2	C3,Fcgr2b	regulation of phagocytosis	0.300647
GO:0007005	3.23907	0.0427611	133	4	Bax,Fam162a,Sod2,Slc25a4	mitochondrion organization	0.300647
GO:0043065	3.21357	0.0437591	134	4	Bax,Fam162a,Anxa1,Nupr1	positive regulation of apoptotic process	0.300647
GO:0003073	6.39585	0.0446552	34	2	Sod2,G6pdx	regulation of systemic arterial blood pressure	0.300647
GO:0006919	6.39585	0.0446552	34	2	Bax,Fam162a	activation of cysteine-type endopeptidase activity involved in apoptotic process	0.300647
GO:0016485	3.18847	0.0447703	135	4	Bax,Fam162a,Srgn,C3	protein processing	0.300647
GO:0001649	4.0308	0.0449349	80	3	Ifitm1,Id1,Cebpb	osteoblast differentiation	0.300647
GO:0051098	4.0308	0.0449349	80	3	Bax,Anxa2,Id1	regulation of binding	0.300647
GO:0043068	3.16374	0.0457947	136	4	Bax,Fam162a,Anxa1,Nupr1	positive regulation of programmed cell death	0.303273
GO:0006641	6.20111	0.0470648	35	2	C3,Gpx1	triglyceride metabolic process	0.308536
GO:0010942	3.09176	0.0489469	139	4	Bax,Fam162a,Anxa1,Nupr1	positive regulation of cell death	0.317665
GO:0050777	6.01781	0.0495213	36	2	Fcgr2b,Gpx1	negative regulation of immune response	0.318211
GO:0051604	3.06848	0.0500239	140	4	Bax,Fam162a,Srgn,C3	protein maturation	0.31829
GO:0051259	3.82915	0.0506954	84	3	Bax,Mgst1,Aldoa	protein oligomerization	0.31943
GO:0008203	5.68175	0.0545704	38	2	Apoe,Lrp1	cholesterol metabolic process	0.34054
GO:0048872	2.957	0.0556059	145	4	Spi1,Bax,Anxa1,G6pdx	homeostasis of number of cells	0.343697
GO:0051651	5.52734	0.0571607	39	2	Apoe,Srgn	maintenance of location in cell	0.346357
GO:0001503	2.91459	0.0579302	147	4	Ifitm1,Id1,Cebpb,Nfe2	ossification	0.346357
GO:0008406	3.60291	0.058378	89	3	Bax,Ctsl,Nupr1	gonad development	0.346357
GO:0016125	5.3817	0.0597936	40	2	Apoe,Lrp1	sterol metabolic process	0.346357
GO:0071229	5.3817	0.0597936	40	2	Anxa2,Cebpb	cellular response to acid	0.346357
GO:0000302	5.24225	0.0624677	41	2	Sod2,Gpx1	response to reactive oxygen species	0.346357
GO:0006639	5.24225	0.0624677	41	2	C3,Gpx1	acylglycerol metabolic process	0.346357
GO:0009267	5.24225	0.0624677	41	2	Ctsd,Ctsl	cellular response to starvation	0.346357
GO:0031638	5.24225	0.0624677	41	2	Bax,Fam162a	zymogen activation	0.346357
GO:0034599	5.24225	0.0624677	41	2	Sod2,Gpx1	cellular response to oxidative stress	0.346357
GO:0043280	5.24225	0.0624677	41	2	Bax,Fam162a	positive regulation of cysteine-type endopeptidase activity involved in apoptotic process	0.346357
GO:0052547	3.44072	0.0648995	93	3	Bax,Fam162a,Serpinb1a	regulation of peptidase activity	0.346357
GO:0015758	5.11096	0.0651823	42	2	C3,Fabp5	glucose transport	0.346357
GO:0045807	5.11096	0.0651823	42	2	C3,Fcgr2b	positive regulation of endocytosis	0.346357
GO:0055088	5.11096	0.0651823	42	2	Apoe,Ehd1	lipid homeostasis	0.346357
GO:2001056	5.11096	0.0651823	42	2	Bax,Fam162a	positive regulation of cysteine-type endopeptidase activity	0.346357
GO:0009617	2.79419	0.0652145	153	4	Fcgr2b,Cebpb,Gpx1,Lyz2	response to bacterium	0.346357
GO:0006638	4.98454	0.067936	43	2	C3,Gpx1	neutral lipid metabolic process	0.346357
GO:0042100	4.98454	0.067936	43	2	Bax,Fcgr2b	B cell proliferation	0.346357
GO:0010638	3.36472	0.0682822	95	3	Rac1,Bax,Fam162a	positive regulation of organelle organization	0.346357
GO:0001525	2.73755	0.0690303	156	4	C3,Anxa2,Id1,Gpx1	angiogenesis	0.346357
GO:0010950	4.86532	0.0707281	44	2	Bax,Fam162a	positive regulation of endopeptidase activity	0.346357
GO:0042594	4.86532	0.0707281	44	2	Ctsd,Ctsl	response to starvation	0.346357
GO:0051607	4.86532	0.0707281	44	2	Ifitm1,Ifitm3	defense response to virus	0.346357
GO:0034976	4.75149	0.0735574	45	2	Bax,Cebpb	response to endoplasmic reticulum stress	0.346357
GO:0008643	4.64244	0.076423	46	2	C3,Fabp5	carbohydrate transport	0.346357
GO:0009566	4.64244	0.076423	46	2	Bax,Cd9	fertilization	0.346357
GO:0021987	4.64244	0.076423	46	2	Rac1,Bax	cerebral cortex development	0.346357
GO:0051402	3.18844	0.0770846	100	3	Bax,Fam162a,Gpx1	neuron apoptotic process	0.346357
GO:0016064	4.53923	0.0793239	47	2	C3,Fcgr2b	immunoglobulin mediated immune response	0.346357
GO:0030336	4.53923	0.0793239	47	2	Ifitm1,Lrp1	negative regulation of cell migration	0.346357
GO:0030334	2.5969	0.0797624	164	4	Rac1,Ifitm1,Lrp1,Tmsb4x	regulation of cell migration	0.346357
GO:0045444	3.12291	0.0807403	102	3	Sod2,Cebpb,Gpx1	fat cell differentiation	0.346357
GO:0031669	4.43958	0.0822591	48	2	Ctsd,Ctsl	cellular response to nutrient levels	0.346357
GO:2000146	4.43958	0.0822591	48	2	Ifitm1,Lrp1	negative regulation of cell motility	0.346357
GO:0002460	3.05998	0.0844711	104	3	C3,Fcgr2b,Rab27a	adaptive immune response based on somatic recombination of immune receptors built from immunoglobulin superfamily domains	0.346357
GO:0030324	3.05998	0.0844711	104	3	Hsd11b1,Ctsz,Id1	lung development	0.346357
GO:0070997	3.05998	0.0844711	104	3	Bax,Fam162a,Gpx1	neuron death	0.346357
GO:0019724	4.34431	0.0852277	49	2	C3,Fcgr2b	B cell mediated immunity	0.346357
GO:0008217	4.25308	0.0882288	50	2	Sod2,G6pdx	regulation of blood pressure	0.346357
GO:0008585	4.25308	0.0882288	50	2	Bax,Nupr1	female gonad development	0.346357
GO:0010952	4.25308	0.0882288	50	2	Bax,Fam162a	positive regulation of peptidase activity	0.346357
GO:0051271	4.25308	0.0882288	50	2	Ifitm1,Lrp1	negative regulation of cellular component movement	0.346357
GO:0030323	2.97013	0.0902046	107	3	Hsd11b1,Ctsz,Id1	respiratory tube development	0.346357
GO:0046545	4.0813	0.0943247	52	2	Bax,Nupr1	development of primary female sexual characteristics	0.346357
GO:0061180	4.0813	0.0943247	52	2	Bax,Cebpb	mammary gland epithelium development	0.346357
GO:0002675	11.2048	0.095382	10	1	C3	positive regulation of acute inflammatory response	0.346357
GO:0006739	11.2048	0.095382	10	1	G6pdx	NADP metabolic process	0.346357
GO:0010874	11.2048	0.095382	10	1	Lrp1	regulation of cholesterol efflux	0.346357
GO:0033198	11.2048	0.095382	10	1	Sell	response to ATP	0.346357
GO:0033599	11.2048	0.095382	10	1	Bax	regulation of mammary gland epithelial cell proliferation	0.346357
GO:0034381	11.2048	0.095382	10	1	Ehd1	plasma lipoprotein particle clearance	0.346357
GO:0035909	11.2048	0.095382	10	1	Lrp1	aorta morphogenesis	0.346357
GO:0042119	11.2048	0.095382	10	1	Tyrobp	neutrophil activation	0.346357
GO:0045777	11.2048	0.095382	10	1	G6pdx	positive regulation of blood pressure	0.346357
GO:0046902	11.2048	0.095382	10	1	Bax	regulation of mitochondrial membrane permeability	0.346357
GO:0060117	11.2048	0.095382	10	1	Rac1	auditory receptor cell development	0.346357
GO:0070252	11.2048	0.095382	10	1	Myl6	actin-mediated cell contraction	0.346357
GO:0070301	11.2048	0.095382	10	1	Gpx1	cellular response to hydrogen peroxide	0.346357
GO:0007548	2.85809	0.0980983	111	3	Bax,Ctsl,Nupr1	sex differentiation	0.346357
GO:2000145	2.39604	0.098876	177	4	Rac1,Ifitm1,Lrp1,Tmsb4x	regulation of cell motility	0.346357
GO:0001776	3.92329	0.10054	54	2	Bax,Anxa1	leukocyte homeostasis	0.346357
GO:0002250	2.80512	0.102148	113	3	C3,Fcgr2b,Rab27a	adaptive immune response	0.346357
GO:0045087	2.80512	0.102148	113	3	Ifitm1,Ifitm3,Rab27a	innate immune response	0.346357
GO:0002455	10.0805	0.104414	11	1	Fcgr2b	humoral immune response mediated by circulating immunoglobulin	0.346357
GO:0003081	10.0805	0.104414	11	1	G6pdx	regulation of systemic arterial blood pressure by renin-angiotensin	0.346357
GO:0010828	10.0805	0.104414	11	1	C3	positive regulation of glucose transport	0.346357
GO:0015909	10.0805	0.104414	11	1	Anxa1	long-chain fatty acid transport	0.346357
GO:0019430	10.0805	0.104414	11	1	Sod2	removal of superoxide radicals	0.346357
GO:0019432	10.0805	0.104414	11	1	C3	triglyceride biosynthetic process	0.346357
GO:0021799	10.0805	0.104414	11	1	Rac1	cerebral cortex radially oriented cell migration	0.346357
GO:0021884	10.0805	0.104414	11	1	Rac1	forebrain neuron development	0.346357
GO:0022406	10.0805	0.104414	11	1	Plek	membrane docking	0.346357
GO:0030540	10.0805	0.104414	11	1	Bax	female genitalia development	0.346357
GO:0032374	10.0805	0.104414	11	1	Lrp1	regulation of cholesterol transport	0.346357
GO:0035914	10.0805	0.104414	11	1	Nupr1	skeletal muscle cell differentiation	0.346357
GO:0042554	10.0805	0.104414	11	1	Sod2	superoxide anion generation	0.346357
GO:0043043	10.0805	0.104414	11	1	Alox5ap	peptide biosynthetic process	0.346357
GO:0043392	10.0805	0.104414	11	1	Id1	negative regulation of DNA binding	0.346357
GO:0045071	10.0805	0.104414	11	1	Ifitm1	negative regulation of viral genome replication	0.346357
GO:0045429	10.0805	0.104414	11	1	Sod2	positive regulation of nitric oxide biosynthetic process	0.346357
GO:0051279	10.0805	0.104414	11	1	Bax	regulation of release of sequestered calcium ion into cytosol	0.346357
GO:0060442	10.0805	0.104414	11	1	Cd44	branching involved in prostate gland morphogenesis	0.346357
GO:0072661	10.0805	0.104414	11	1	Myl12a	protein targeting to plasma membrane	0.346357
GO:0090207	10.0805	0.104414	11	1	C3	regulation of triglyceride metabolic process	0.346357
GO:0002443	2.75404	0.106265	115	3	C3,Fcgr2b,Rab27a	leukocyte mediated immunity	0.346357
GO:0045765	3.77677	0.106867	56	2	C3,Id1	regulation of angiogenesis	0.346357
GO:0007568	3.64082	0.113299	58	2	Sod2,Ctsl	aging	0.346357
GO:0040014	3.64082	0.113299	58	2	Apoe,G6pdx	regulation of multicellular organism growth	0.346357
GO:0000266	9.16476	0.113357	12	1	Bax	mitochondrial fission	0.346357
GO:0000303	9.16476	0.113357	12	1	Sod2	response to superoxide	0.346357
GO:0001773	9.16476	0.113357	12	1	Spi1	myeloid dendritic cell activation	0.346357
GO:0001893	9.16476	0.113357	12	1	Ctsl	maternal placenta development	0.346357
GO:0002320	9.16476	0.113357	12	1	Spi1	lymphoid progenitor cell differentiation	0.346357
GO:0006309	9.16476	0.113357	12	1	Bax	apoptotic DNA fragmentation	0.346357
GO:0009410	9.16476	0.113357	12	1	Gpx1	response to xenobiotic stimulus	0.346357
GO:0010977	9.16476	0.113357	12	1	Vim	negative regulation of neuron projection development	0.346357
GO:0030225	9.16476	0.113357	12	1	Spi1	macrophage differentiation	0.346357
GO:0030889	9.16476	0.113357	12	1	Fcgr2b	negative regulation of B cell proliferation	0.346357
GO:0032091	9.16476	0.113357	12	1	Bax	negative regulation of protein binding	0.346357
GO:0046470	9.16476	0.113357	12	1	Fabp5	phosphatidylcholine metabolic process	0.346357
GO:0048070	9.16476	0.113357	12	1	Bax	regulation of developmental pigmentation	0.346357
GO:0048821	9.16476	0.113357	12	1	G6pdx	erythrocyte development	0.346357
GO:0051384	9.16476	0.113357	12	1	Ctsl	response to glucocorticoid stimulus	0.346357
GO:0070527	9.16476	0.113357	12	1	Plek	platelet aggregation	0.346357
GO:0016197	3.57647	0.116553	59	2	Dpy30,Ehd1	endosomal transport	0.346357
GO:0045216	3.57647	0.116553	59	2	Rac1,Cd9	cell-cell junction organization	0.346357
GO:0060541	2.63391	0.11684	120	3	Hsd11b1,Ctsz,Id1	respiratory system development	0.346357
GO:0000305	8.4018	0.122212	13	1	Sod2	response to oxygen radical	0.346357
GO:0002820	8.4018	0.122212	13	1	Fcgr2b	negative regulation of adaptive immune response	0.346357
GO:0006998	8.4018	0.122212	13	1	Bax	nuclear envelope organization	0.346357
GO:0010543	8.4018	0.122212	13	1	Plek	regulation of platelet activation	0.346357
GO:0031529	8.4018	0.122212	13	1	Rac1	ruffle organization	0.346357
GO:0032288	8.4018	0.122212	13	1	Cd9	myelin assembly	0.346357
GO:0032370	8.4018	0.122212	13	1	Lrp1	positive regulation of lipid transport	0.346357
GO:0033059	8.4018	0.122212	13	1	Rab27a	cellular pigmentation	0.346357
GO:0034605	8.4018	0.122212	13	1	Hsf3	cellular response to heat	0.346357
GO:0042267	8.4018	0.122212	13	1	Rab27a	natural killer cell mediated cytotoxicity	0.346357
GO:0043552	8.4018	0.122212	13	1	Rac1	positive regulation of phosphatidylinositol 3-kinase activity	0.346357
GO:0051702	8.4018	0.122212	13	1	Gpx1	interaction with symbiont	0.346357
GO:0060561	8.4018	0.122212	13	1	Bax	apoptotic process involved in morphogenesis	0.346357
GO:0070306	8.4018	0.122212	13	1	Vim	lens fiber cell differentiation	0.346357
GO:0090103	8.4018	0.122212	13	1	Rac1	cochlea morphogenesis	0.346357
GO:0097028	8.4018	0.122212	13	1	Spi1	dendritic cell differentiation	0.346357
GO:0051050	2.19883	0.123352	192	4	Bax,C3,Fcgr2b,Lrp1	positive regulation of transport	0.346613
GO:0010256	2.56677	0.123371	123	3	Bax,Srgn,Myl12a	endomembrane system organization	0.346613
GO:0016055	2.5451	0.125577	124	3	Rac1,Cd44,Lrp1	Wnt receptor signaling pathway	0.346965
GO:0021543	3.39552	0.126455	62	2	Rac1,Bax	pallium development	0.346965
GO:0031667	3.39552	0.126455	62	2	Ctsd,Ctsl	response to nutrient levels	0.346965
GO:0043281	3.39552	0.126455	62	2	Bax,Fam162a	regulation of cysteine-type endopeptidase activity involved in apoptotic process	0.346965
GO:0051270	2.17488	0.126799	194	4	Rac1,Ifitm1,Lrp1,Tmsb4x	regulation of cellular component movement	0.346965
GO:0031668	3.33927	0.129801	63	2	Ctsd,Ctsl	cellular response to extracellular stimulus	0.346965
GO:0002902	7.75383	0.130981	14	1	Bax	regulation of B cell apoptotic process	0.346965
GO:0006636	7.75383	0.130981	14	1	Alox5ap	unsaturated fatty acid biosynthetic process	0.346965
GO:0006687	7.75383	0.130981	14	1	Bax	glycosphingolipid metabolic process	0.346965
GO:0019886	7.75383	0.130981	14	1	Fcgr2b	antigen processing and presentation of exogenous peptide antigen via MHC class II	0.346965
GO:0030851	7.75383	0.130981	14	1	Spi1	granulocyte differentiation	0.346965
GO:0035456	7.75383	0.130981	14	1	Ifitm1	response to interferon-beta	0.346965
GO:0046456	7.75383	0.130981	14	1	Alox5ap	icosanoid biosynthetic process	0.346965
GO:0050709	7.75383	0.130981	14	1	Srgn	negative regulation of protein secretion	0.346965
GO:0002819	3.23213	0.136553	65	2	C3,Fcgr2b	regulation of adaptive immune response	0.353753
GO:0010259	7.20031	0.139663	15	1	Ctsl	multicellular organismal aging	0.353753
GO:0010522	7.20031	0.139663	15	1	Bax	regulation of calcium ion transport into cytosol	0.353753
GO:0032963	7.20031	0.139663	15	1	Id1	collagen metabolic process	0.353753
GO:0034644	7.20031	0.139663	15	1	Bax	cellular response to UV	0.353753
GO:0042771	7.20031	0.139663	15	1	Nupr1	intrinsic apoptotic signaling pathway in response to DNA damage by p53 class mediator	0.353753
GO:0043534	7.20031	0.139663	15	1	Gpx1	blood vessel endothelial cell migration	0.353753
GO:0046164	7.20031	0.139663	15	1	Apoe	alcohol catabolic process	0.353753
GO:0051289	7.20031	0.139663	15	1	Aldoa	protein homotetramerization	0.353753
GO:0070059	7.20031	0.139663	15	1	Bax	intrinsic apoptotic signaling pathway in response to endoplasmic reticulum stress	0.353753
GO:0030100	3.18107	0.139958	66	2	C3,Fcgr2b	regulation of endocytosis	0.353753
GO:0007517	2.38378	0.143737	132	3	Nupr1,Gpx1,Myl6	muscle organ development	0.353753
GO:0030218	3.08359	0.146825	68	2	Spi1,G6pdx	erythrocyte differentiation	0.353753
GO:0002532	6.7184	0.14826	16	1	Alox5ap	production of molecular mediator involved in inflammatory response	0.353753
GO:0009593	6.7184	0.14826	16	1	Sod2	detection of chemical stimulus	0.353753
GO:0022904	6.7184	0.14826	16	1	Sod2	respiratory electron transport chain	0.353753
GO:0030262	6.7184	0.14826	16	1	Bax	apoptotic nuclear changes	0.353753
GO:0030279	6.7184	0.14826	16	1	Nfe2	negative regulation of ossification	0.353753
GO:0033032	6.7184	0.14826	16	1	Anxa1	regulation of myeloid cell apoptotic process	0.353753
GO:0042310	6.7184	0.14826	16	1	G6pdx	vasoconstriction	0.353753
GO:0043550	6.7184	0.14826	16	1	Rac1	regulation of lipid kinase activity	0.353753
GO:0044259	6.7184	0.14826	16	1	Id1	multicellular organismal macromolecule metabolic process	0.353753
GO:0048490	6.7184	0.14826	16	1	Ap3s1	anterograde synaptic vesicle transport	0.353753
GO:0051881	6.7184	0.14826	16	1	Sod2	regulation of mitochondrial membrane potential	0.353753
GO:0060441	6.7184	0.14826	16	1	Ctsz	epithelial tube branching involved in lung morphogenesis	0.353753
GO:0071453	6.7184	0.14826	16	1	Fam162a	cellular response to oxygen levels	0.353753
GO:0071456	6.7184	0.14826	16	1	Fam162a	cellular response to hypoxia	0.353753
GO:0000045	6.29773	0.156773	17	1	Ctsd	autophagic vacuole assembly	0.358098
GO:0001659	6.29773	0.156773	17	1	Gpx1	temperature homeostasis	0.358098
GO:0001783	6.29773	0.156773	17	1	Bax	B cell apoptotic process	0.358098
GO:0002495	6.29773	0.156773	17	1	Fcgr2b	antigen processing and presentation of peptide antigen via MHC class II	0.358098
GO:0021772	6.29773	0.156773	17	1	Rac1	olfactory bulb development	0.358098
GO:0033028	6.29773	0.156773	17	1	Anxa1	myeloid cell apoptotic process	0.358098
GO:0045069	6.29773	0.156773	17	1	Ifitm1	regulation of viral genome replication	0.358098
GO:0045104	6.29773	0.156773	17	1	Vim	intermediate filament cytoskeleton organization	0.358098
GO:0045428	6.29773	0.156773	17	1	Sod2	regulation of nitric oxide biosynthetic process	0.358098
GO:0046677	6.29773	0.156773	17	1	Id1	response to antibiotic	0.358098
GO:0048873	6.29773	0.156773	17	1	Bax	homeostasis of number of cells within a tissue	0.358098
GO:0072332	6.29773	0.156773	17	1	Nupr1	intrinsic apoptotic signaling pathway by p53 class mediator	0.358098
GO:0051648	2.94798	0.157254	71	2	Ap3s1,Rab27a	vesicle localization	0.358098
GO:0034101	2.90536	0.160762	72	2	Spi1,G6pdx	erythrocyte homeostasis	0.364681
GO:0009615	2.86394	0.164285	73	2	Ifitm1,Ifitm3	response to virus	0.364681
GO:0006308	5.92657	0.165202	18	1	Bax	DNA catabolic process	0.364681
GO:0019079	5.92657	0.165202	18	1	Ifitm1	viral genome replication	0.364681
GO:0021988	5.92657	0.165202	18	1	Rac1	olfactory lobe development	0.364681
GO:0045103	5.92657	0.165202	18	1	Vim	intermediate filament-based process	0.364681
GO:0051149	5.92657	0.165202	18	1	Tmsb4x	positive regulation of muscle cell differentiation	0.364681
GO:0071482	5.92657	0.165202	18	1	Bax	cellular response to light stimulus	0.364681
GO:0090102	5.92657	0.165202	18	1	Rac1	cochlea development	0.364681
GO:0008202	2.82367	0.167822	74	2	Apoe,Lrp1	steroid metabolic process	0.366722
GO:0009306	2.82367	0.167822	74	2	Srgn,Plek	protein secretion	0.366722
GO:0032956	2.82367	0.167822	74	2	Rac1,Lrp1	regulation of actin cytoskeleton organization	0.366722
GO:0006091	2.7845	0.171372	75	2	Sod2,Pygl	generation of precursor metabolites and energy	0.366883
GO:0001736	5.59663	0.173549	19	1	Rac1	establishment of planar polarity	0.366883
GO:0001913	5.59663	0.173549	19	1	Rab27a	T cell mediated cytotoxicity	0.366883
GO:0015908	5.59663	0.173549	19	1	Anxa1	fatty acid transport	0.366883
GO:0021795	5.59663	0.173549	19	1	Rac1	cerebral cortex cell migration	0.366883
GO:0034446	5.59663	0.173549	19	1	Rac1	substrate adhesion-dependent cell spreading	0.366883
GO:0048708	5.59663	0.173549	19	1	Vim	astrocyte differentiation	0.366883
GO:0060071	5.59663	0.173549	19	1	Rac1	Wnt receptor signaling pathway, planar cell polarity pathway	0.366883
GO:0060119	5.59663	0.173549	19	1	Rac1	inner ear receptor cell development	0.366883
GO:0090175	5.59663	0.173549	19	1	Rac1	regulation of establishment of planar polarity	0.366883
GO:0008610	2.14499	0.177443	146	3	C3,Fabp5,Alox5ap	lipid biosynthetic process	0.368083
GO:0009791	2.70921	0.178512	77	2	Bax,Sod2	post-embryonic development	0.368083
GO:0009991	2.70921	0.178512	77	2	Ctsd,Ctsl	response to extracellular stimulus	0.368083
GO:0007043	5.3021	0.181813	20	1	Cd9	cell-cell junction assembly	0.368083
GO:0008089	5.3021	0.181813	20	1	Ap3s1	anterograde axon cargo transport	0.368083
GO:0010623	5.3021	0.181813	20	1	Bax	developmental programmed cell death	0.368083
GO:0032615	5.3021	0.181813	20	1	G6pdx	interleukin-12 production	0.368083
GO:0042491	5.3021	0.181813	20	1	Rac1	auditory receptor cell differentiation	0.368083
GO:0043525	5.3021	0.181813	20	1	Bax	positive regulation of neuron apoptotic process	0.368083
GO:0051568	5.3021	0.181813	20	1	Dpy30	histone H3-K4 methylation	0.368083
GO:0051928	5.3021	0.181813	20	1	Bax	positive regulation of calcium ion transport	0.368083
GO:0060135	5.3021	0.181813	20	1	Ctsl	maternal process involved in female pregnancy	0.368083
GO:0009314	2.08509	0.187461	150	3	Bax,Sod2,Gpx1	response to radiation	0.368083
GO:0030879	2.60368	0.189307	80	2	Bax,Cebpb	mammary gland development	0.368083
GO:0030162	2.07055	0.18999	151	3	Bax,Fam162a,Serpinb1a	regulation of proteolysis	0.368083
GO:0001782	5.035	0.189997	21	1	Bax	B cell homeostasis	0.368083
GO:0021879	5.035	0.189997	21	1	Rac1	forebrain neuron differentiation	0.368083
GO:0030048	5.035	0.189997	21	1	Myl6	actin filament-based movement	0.368083
GO:0030199	5.035	0.189997	21	1	Anxa2	collagen fibril organization	0.368083
GO:0030318	5.035	0.189997	21	1	Rab27a	melanocyte differentiation	0.368083
GO:0030968	5.035	0.189997	21	1	Bax	endoplasmic reticulum unfolded protein response	0.368083
GO:0034341	5.035	0.189997	21	1	Ifitm1	response to interferon-gamma	0.368083
GO:0035567	5.035	0.189997	21	1	Rac1	non-canonical Wnt receptor signaling pathway	0.368083
GO:0042116	5.035	0.189997	21	1	Tyrobp	macrophage activation	0.368083
GO:0045668	5.035	0.189997	21	1	Id1	negative regulation of osteoblast differentiation	0.368083
GO:0048284	5.035	0.189997	21	1	Bax	organelle fusion	0.368083
GO:0050869	5.035	0.189997	21	1	Fcgr2b	negative regulation of B cell activation	0.368083
GO:1901216	5.035	0.189997	21	1	Bax	positive regulation of neuron death	0.368083
GO:0006874	2.53775	0.196555	82	2	Apoe,Bax	cellular calcium ion homeostasis	0.370509
GO:0022612	2.53775	0.196555	82	2	Bax,Cd44	gland morphogenesis	0.370509
GO:0032970	2.53775	0.196555	82	2	Rac1,Lrp1	regulation of actin filament-based process	0.370509
GO:0001974	4.7951	0.1981	22	1	Bax	blood vessel remodeling	0.370509
GO:0002637	4.7951	0.1981	22	1	Fcgr2b	regulation of immunoglobulin production	0.370509
GO:0009408	4.7951	0.1981	22	1	Hsf3	response to heat	0.370509
GO:0034620	4.7951	0.1981	22	1	Bax	cellular response to unfolded protein	0.370509
GO:0044236	4.7951	0.1981	22	1	Id1	multicellular organismal metabolic process	0.370509
GO:0045599	4.7951	0.1981	22	1	Sod2	negative regulation of fat cell differentiation	0.370509
GO:0055072	4.7951	0.1981	22	1	Sod2	iron ion homeostasis	0.370509
GO:0060512	4.7951	0.1981	22	1	Cd44	prostate gland morphogenesis	0.370509
GO:0060740	4.7951	0.1981	22	1	Cd44	prostate gland epithelium morphogenesis	0.370509
GO:0005977	4.57712	0.206123	23	1	Pygl	glycogen metabolic process	0.375769
GO:0006801	4.57712	0.206123	23	1	Sod2	superoxide metabolic process	0.375769
GO:0007006	4.57712	0.206123	23	1	Bax	mitochondrial membrane organization	0.375769
GO:0007229	4.57712	0.206123	23	1	Tyrobp	integrin-mediated signaling pathway	0.375769
GO:0035315	4.57712	0.206123	23	1	Rac1	hair cell differentiation	0.375769
GO:0043029	4.57712	0.206123	23	1	Bax	T cell homeostasis	0.375769
GO:0045055	4.57712	0.206123	23	1	Rab27a	regulated secretory pathway	0.375769
GO:0048008	4.57712	0.206123	23	1	Lrp1	platelet-derived growth factor receptor signaling pathway	0.375769
GO:0051897	4.57712	0.206123	23	1	Gpx1	positive regulation of protein kinase B signaling cascade	0.375769
GO:0072657	2.44488	0.207494	85	2	Bax,Myl12a	protein localization to membrane	0.376488
GO:0014706	1.9746	0.207931	158	3	Nupr1,Gpx1,Myl6	striated muscle tissue development	0.376488
GO:0002366	2.41507	0.211155	86	2	Tyrobp,Rab27a	leukocyte activation involved in immune response	0.376488
GO:0043523	2.41507	0.211155	86	2	Bax,Gpx1	regulation of neuron apoptotic process	0.376488
GO:0055074	2.41507	0.211155	86	2	Apoe,Bax	calcium ion homeostasis	0.376488
GO:0006112	4.37698	0.214067	24	1	Pygl	energy reserve metabolic process	0.376488
GO:0006612	4.37698	0.214067	24	1	Myl12a	protein targeting to membrane	0.376488
GO:0006809	4.37698	0.214067	24	1	Sod2	nitric oxide biosynthetic process	0.376488
GO:0015807	4.37698	0.214067	24	1	Slc7a5	L-amino acid transport	0.376488
GO:0030433	4.37698	0.214067	24	1	Edem1	ER-associated protein catabolic process	0.376488
GO:0034109	4.37698	0.214067	24	1	Plek	homotypic cell-cell adhesion	0.376488
GO:0048806	4.37698	0.214067	24	1	Bax	genitalia development	0.376488
GO:0050873	4.37698	0.214067	24	1	Cebpb	brown fat cell differentiation	0.376488
GO:0010035	2.38628	0.214824	87	2	Sod2,Gpx1	response to inorganic substance	0.376488
GO:0050801	1.93605	0.21574	161	3	Apoe,Bax,Sod2	ion homeostasis	0.376488
GO:0060537	1.91116	0.220983	163	3	Nupr1,Gpx1,Myl6	muscle tissue development	0.376488
GO:0007338	4.19397	0.221934	25	1	Cd9	single fertilization	0.376488
GO:0016236	4.19397	0.221934	25	1	Ctsd	macroautophagy	0.376488
GO:0019218	4.19397	0.221934	25	1	Apoe	regulation of steroid metabolic process	0.376488
GO:0019884	4.19397	0.221934	25	1	Fcgr2b	antigen processing and presentation of exogenous antigen	0.376488
GO:0022029	4.19397	0.221934	25	1	Rac1	telencephalon cell migration	0.376488
GO:0030838	4.19397	0.221934	25	1	Rac1	positive regulation of actin filament polymerization	0.376488
GO:0033135	4.19397	0.221934	25	1	Bax	regulation of peptidyl-serine phosphorylation	0.376488
GO:0060491	4.19397	0.221934	25	1	Rac1	regulation of cell projection assembly	0.376488
GO:0060563	4.19397	0.221934	25	1	Rab27a	neuroepithelial cell differentiation	0.376488
GO:0071230	4.19397	0.221934	25	1	Cebpb	cellular response to amino acid stimulus	0.376488
GO:1901214	2.33065	0.22218	89	2	Bax,Gpx1	regulation of neuron death	0.376488
GO:0001738	4.02556	0.229723	26	1	Rac1	morphogenesis of a polarized epithelium	0.383265
GO:0003014	4.02556	0.229723	26	1	G6pdx	renal system process	0.383265
GO:0007215	4.02556	0.229723	26	1	Grik3	glutamate receptor signaling pathway	0.383265
GO:0008630	4.02556	0.229723	26	1	Nupr1	intrinsic apoptotic signaling pathway in response to DNA damage	0.383265
GO:0045766	4.02556	0.229723	26	1	C3	positive regulation of angiogenesis	0.383265
GO:0090305	4.02556	0.229723	26	1	Bax	nucleic acid phosphodiester bond hydrolysis	0.383265
GO:0021872	3.87016	0.237435	27	1	Rac1	forebrain generation of neurons	0.391105
GO:0021885	3.87016	0.237435	27	1	Rac1	forebrain cell migration	0.391105
GO:0048741	3.87016	0.237435	27	1	Gpx1	skeletal muscle fiber development	0.391105
GO:0051101	3.87016	0.237435	27	1	Id1	regulation of DNA binding	0.391105
GO:0051209	3.87016	0.237435	27	1	Bax	release of sequestered calcium ion into cytosol	0.391105
GO:0006887	2.17801	0.244365	95	2	Plek,Rab27a	exocytosis	0.39272
GO:0015711	2.17801	0.244365	95	2	Anxa1,Slc7a5	organic anion transport	0.39272
GO:0001541	3.72635	0.245072	28	1	Bax	ovarian follicle development	0.39272
GO:0001658	3.72635	0.245072	28	1	Cd44	branching involved in ureteric bud morphogenesis	0.39272
GO:0002286	3.72635	0.245072	28	1	Rab27a	T cell activation involved in immune response	0.39272
GO:0008652	3.72635	0.245072	28	1	Alox5ap	cellular amino acid biosynthetic process	0.39272
GO:0010827	3.72635	0.245072	28	1	C3	regulation of glucose transport	0.39272
GO:0014904	3.72635	0.245072	28	1	Gpx1	myotube cell development	0.39272
GO:0030032	3.72635	0.245072	28	1	Rac1	lamellipodium assembly	0.39272
GO:0030500	3.72635	0.245072	28	1	Nfe2	regulation of bone mineralization	0.39272
GO:0051262	3.72635	0.245072	28	1	Aldoa	protein tetramerization	0.39272
GO:0030198	2.15444	0.248074	96	2	Anxa2,Lgals3	extracellular matrix organization	0.396552
GO:0006576	3.59293	0.252633	29	1	Fabp5	cellular biogenic amine metabolic process	0.396995
GO:0006984	3.59293	0.252633	29	1	Bax	ER-nucleus signaling pathway	0.396995
GO:0021536	3.59293	0.252633	29	1	Bax	diencephalon development	0.396995
GO:0030168	3.59293	0.252633	29	1	Plek	platelet activation	0.396995
GO:0035019	3.59293	0.252633	29	1	Spi1	somatic stem cell maintenance	0.396995
GO:0042158	3.59293	0.252633	29	1	Apoe	lipoprotein biosynthetic process	0.396995
GO:0048002	3.59293	0.252633	29	1	Fcgr2b	antigen processing and presentation of peptide antigen	0.396995
GO:0030098	1.76332	0.255654	176	3	Spi1,Bax,Anxa1	lymphocyte differentiation	0.400772
GO:0001890	2.08664	0.259217	99	2	Ctsl,Cebpb	placenta development	0.402907
GO:0021537	2.08664	0.259217	99	2	Rac1,Bax	telencephalon development	0.402907
GO:0048871	2.08664	0.259217	99	2	Bax,Gpx1	multicellular organismal homeostasis	0.402907
GO:0006986	3.46811	0.26012	30	1	Bax	response to unfolded protein	0.402907
GO:0050830	3.46811	0.26012	30	1	Lyz2	defense response to Gram-positive bacterium	0.402907
GO:0005975	1.74252	0.261064	178	3	Pygl,Fabp5,G6pdx	carbohydrate metabolic process	0.403407
GO:0030101	3.35196	0.267534	31	1	Rab27a	natural killer cell activation	0.411444
GO:0050729	3.35196	0.267534	31	1	C3	positive regulation of inflammatory response	0.411444
GO:0002456	3.24329	0.274874	32	1	Rab27a	T cell mediated immunity	0.414276
GO:0008088	3.24329	0.274874	32	1	Ap3s1	axon cargo transport	0.414276
GO:0043200	3.24329	0.274874	32	1	Cebpb	response to amino acid stimulus	0.414276
GO:0050672	3.24329	0.274874	32	1	Fcgr2b	negative regulation of lymphocyte proliferation	0.414276
GO:0060401	3.24329	0.274874	32	1	Bax	cytosolic calcium ion transport	0.414276
GO:0060402	3.24329	0.274874	32	1	Bax	calcium ion transport into cytosol	0.414276
GO:0090002	3.24329	0.274874	32	1	Myl12a	establishment of protein localization to plasma membrane	0.414276
GO:0048754	1.9826	0.277806	104	2	Cd44,Ctsz	branching morphogenesis of a tube	0.414276
GO:0002237	1.963	0.281523	105	2	Fcgr2b,Cebpb	response to molecule of bacterial origin	0.414276
GO:0007626	1.963	0.281523	105	2	Cstb,Sod2	locomotory behavior	0.414276
GO:0051051	1.963	0.281523	105	2	Srgn,Fcgr2b	negative regulation of transport	0.414276
GO:0006997	3.1414	0.282142	33	1	Bax	nucleus organization	0.414276
GO:0030888	3.1414	0.282142	33	1	Fcgr2b	regulation of B cell proliferation	0.414276
GO:0032273	3.1414	0.282142	33	1	Rac1	positive regulation of protein polymerization	0.414276
GO:0048545	3.1414	0.282142	33	1	Ctsl	response to steroid hormone stimulus	0.414276
GO:0050707	3.1414	0.282142	33	1	Srgn	regulation of cytokine secretion	0.414276
GO:0051145	3.1414	0.282142	33	1	Tmsb4x	smooth muscle cell differentiation	0.414276
GO:0060113	3.1414	0.282142	33	1	Rac1	inner ear receptor cell differentiation	0.414276
GO:0060675	3.1414	0.282142	33	1	Cd44	ureteric bud morphogenesis	0.414276
GO:0070664	3.1414	0.282142	33	1	Fcgr2b	negative regulation of leukocyte proliferation	0.414276
GO:0030850	3.04569	0.289339	34	1	Cd44	prostate gland development	0.421979
GO:0045333	3.04569	0.289339	34	1	Sod2	cellular respiration	0.421979
GO:0046890	3.04569	0.289339	34	1	C3	regulation of lipid biosynthetic process	0.421979
GO:0010954	2.95563	0.296464	35	1	C3	positive regulation of protein processing	0.427567
GO:0016050	2.95563	0.296464	35	1	Srgn	vesicle organization	0.427567
GO:0021675	2.95563	0.296464	35	1	Ctsl	nerve development	0.427567
GO:0021782	2.95563	0.296464	35	1	Vim	glial cell development	0.427567
GO:0042157	2.95563	0.296464	35	1	Apoe	lipoprotein metabolic process	0.427567
GO:0006875	1.87047	0.300088	110	2	Apoe,Bax	cellular metal ion homeostasis	0.429548
GO:0001909	2.87071	0.30352	36	1	Rab27a	leukocyte mediated cytotoxicity	0.429548
GO:0002821	2.87071	0.30352	36	1	C3	positive regulation of adaptive immune response	0.429548
GO:0006839	2.87071	0.30352	36	1	Bax	mitochondrial transport	0.429548
GO:0009749	2.87071	0.30352	36	1	Ctsl	response to glucose stimulus	0.429548
GO:0030833	2.87071	0.30352	36	1	Rac1	regulation of actin filament polymerization	0.429548
GO:0043542	2.87071	0.30352	36	1	Gpx1	endothelial cell migration	0.429548
GO:0051099	2.87071	0.30352	36	1	Anxa2	positive regulation of binding	0.429548
GO:0006820	1.853	0.303794	111	2	Anxa1,Slc7a5	anion transport	0.429548
GO:0002683	1.83584	0.307497	112	2	Fcgr2b,Gpx1	negative regulation of immune system process	0.433839
GO:0006633	2.79051	0.310506	37	1	Alox5ap	fatty acid biosynthetic process	0.434307
GO:0009308	2.79051	0.310506	37	1	Fabp5	amine metabolic process	0.434307
GO:0010951	2.79051	0.310506	37	1	Serpinb1a	negative regulation of endopeptidase activity	0.434307
GO:0048747	2.79051	0.310506	37	1	Gpx1	muscle fiber development	0.434307
GO:0050673	1.80226	0.314894	114	2	Bax,Cebpb	epithelial cell proliferation	0.434615
GO:0001756	2.71457	0.317423	38	1	Ifitm1	somitogenesis	0.434615
GO:0002088	2.71457	0.317423	38	1	Vim	lens development in camera-type eye	0.434615
GO:0008277	2.71457	0.317423	38	1	C3	regulation of G-protein coupled receptor protein signaling pathway	0.434615
GO:0021761	2.71457	0.317423	38	1	Bax	limbic system development	0.434615
GO:0032675	2.71457	0.317423	38	1	Cebpb	regulation of interleukin-6 production	0.434615
GO:0034968	2.71457	0.317423	38	1	Dpy30	histone lysine methylation	0.434615
GO:0042475	2.71457	0.317423	38	1	Bax	odontogenesis of dentin-containing tooth	0.434615
GO:0042490	2.71457	0.317423	38	1	Rac1	mechanoreceptor differentiation	0.434615
GO:0051896	2.71457	0.317423	38	1	Gpx1	regulation of protein kinase B signaling cascade	0.434615
GO:0042113	1.77007	0.322275	116	2	Bax,Fcgr2b	B cell activation	0.440277
GO:0006898	2.64273	0.324272	39	1	Lrp1	receptor-mediated endocytosis	0.440277
GO:0019882	2.64273	0.324272	39	1	Fcgr2b	antigen processing and presentation	0.440277
GO:0022602	2.64273	0.324272	39	1	Bax	ovulation cycle process	0.440277
GO:0060627	1.75436	0.325959	117	2	C3,Fcgr2b	regulation of vesicle-mediated transport	0.441643
GO:0010466	2.57455	0.331054	40	1	Serpinb1a	negative regulation of peptidase activity	0.444386
GO:0021954	2.57455	0.331054	40	1	Rac1	central nervous system neuron development	0.444386
GO:0030258	2.57455	0.331054	40	1	Apoe	lipid modification	0.444386
GO:0045185	2.57455	0.331054	40	1	Srgn	maintenance of protein location	0.444386
GO:0006873	1.70882	0.336981	120	2	Apoe,Bax	cellular ion homeostasis	0.444386
GO:0002244	2.50979	0.337768	41	1	Spi1	hematopoietic progenitor cell differentiation	0.444386
GO:0006665	2.50979	0.337768	41	1	Bax	sphingolipid metabolic process	0.444386
GO:0009266	2.50979	0.337768	41	1	Hsf3	response to temperature stimulus	0.444386
GO:0009743	2.50979	0.337768	41	1	Ctsl	response to carbohydrate stimulus	0.444386
GO:0042698	2.50979	0.337768	41	1	Bax	ovulation cycle	0.444386
GO:0043270	2.50979	0.337768	41	1	Bax	positive regulation of ion transport	0.444386
GO:0060443	2.50979	0.337768	41	1	Bax	mammary gland morphogenesis	0.444386
GO:2000021	2.50979	0.337768	41	1	Bax	regulation of ion homeostasis	0.444386
GO:0032943	1.69415	0.340645	121	2	Bax,Fcgr2b	mononuclear cell proliferation	0.444386
GO:0046651	1.69415	0.340645	121	2	Bax,Fcgr2b	lymphocyte proliferation	0.444386
GO:0001889	2.44817	0.344417	42	1	Sod2	liver development	0.444386
GO:0002260	2.44817	0.344417	42	1	Bax	lymphocyte homeostasis	0.444386
GO:0016051	2.44817	0.344417	42	1	G6pdx	carbohydrate biosynthetic process	0.444386
GO:0030041	2.44817	0.344417	42	1	Rac1	actin filament polymerization	0.444386
GO:0030282	2.44817	0.344417	42	1	Nfe2	bone mineralization	0.444386
GO:0046474	2.44817	0.344417	42	1	Fabp5	glycerophospholipid biosynthetic process	0.444386
GO:0048813	2.44817	0.344417	42	1	Rac1	dendrite morphogenesis	0.444386
GO:0051495	2.44817	0.344417	42	1	Rac1	positive regulation of cytoskeleton organization	0.444386
GO:0061053	2.44817	0.344417	42	1	Ifitm1	somite development	0.444386
GO:0008064	2.38933	0.350999	43	1	Rac1	regulation of actin polymerization or depolymerization	0.448423
GO:0032388	2.38933	0.350999	43	1	Bax	positive regulation of intracellular transport	0.448423
GO:0050663	2.38933	0.350999	43	1	Srgn	cytokine secretion	0.448423
GO:0051924	2.38933	0.350999	43	1	Bax	regulation of calcium ion transport	0.448423
GO:0072659	2.38933	0.350999	43	1	Myl12a	protein localization to plasma membrane	0.448423
GO:0070661	1.63787	0.355239	125	2	Bax,Fcgr2b	leukocyte proliferation	0.451371
GO:0007204	2.33345	0.357517	44	1	Bax	elevation of cytosolic calcium ion concentration	0.451371
GO:0030832	2.33345	0.357517	44	1	Rac1	regulation of actin filament length	0.451371
GO:0043393	2.33345	0.357517	44	1	Bax	regulation of protein binding	0.451371
GO:0045598	2.33345	0.357517	44	1	Sod2	regulation of fat cell differentiation	0.451371
GO:0048489	2.33345	0.357517	44	1	Ap3s1	synaptic vesicle transport	0.451371
GO:0014070	1.62436	0.358871	126	2	Ctsl,Sell	response to organic cyclic compound	0.451371
GO:0051493	1.62436	0.358871	126	2	Rac1,Lrp1	regulation of cytoskeleton organization	0.451371
GO:0031344	1.61107	0.362496	127	2	Rac1,Vim	regulation of cell projection organization	0.455049
GO:0001818	2.28006	0.363971	45	1	Fcgr2b	negative regulation of cytokine production	0.455139
GO:0007033	2.28006	0.363971	45	1	Ctsd	vacuole organization	0.455139
GO:0061138	1.58512	0.369725	129	2	Cd44,Ctsz	morphogenesis of a branching epithelium	0.459588
GO:0006914	2.22898	0.370361	46	1	Ctsd	autophagy	0.459588
GO:0042035	2.22898	0.370361	46	1	Cebpb	regulation of cytokine biosynthetic process	0.459588
GO:0051147	2.22898	0.370361	46	1	Tmsb4x	regulation of muscle cell differentiation	0.459588
GO:0008654	2.18027	0.376688	47	1	Fabp5	phospholipid biosynthetic process	0.465658
GO:0051480	2.18027	0.376688	47	1	Bax	cytosolic calcium ion homeostasis	0.465658
GO:0006865	2.13345	0.382952	48	1	Slc7a5	amino acid transport	0.468936
GO:0030509	2.13345	0.382952	48	1	Id1	BMP signaling pathway	0.468936
GO:0031214	2.13345	0.382952	48	1	Nfe2	biomineral tissue development	0.468936
GO:0042476	2.13345	0.382952	48	1	Bax	odontogenesis	0.468936
GO:0043491	2.13345	0.382952	48	1	Gpx1	protein kinase B signaling cascade	0.468936
GO:0042391	1.53559	0.384091	133	2	Sod2,Cd9	regulation of membrane potential	0.469445
GO:0001763	1.52368	0.387662	134	2	Cd44,Ctsz	morphogenesis of a branching structure	0.471197
GO:0002377	2.08862	0.389155	49	1	Fcgr2b	immunoglobulin production	0.471197
GO:0014902	2.08862	0.389155	49	1	Gpx1	myotube differentiation	0.471197
GO:0030705	2.08862	0.389155	49	1	Ap3s1	cytoskeleton-dependent intracellular transport	0.471197
GO:0046632	2.08862	0.389155	49	1	Anxa1	alpha-beta T cell differentiation	0.471197
GO:0001666	2.04563	0.395296	50	1	Fam162a	response to hypoxia	0.473335
GO:0007565	2.04563	0.395296	50	1	Ctsl	female pregnancy	0.473335
GO:0031647	2.04563	0.395296	50	1	Id1	regulation of protein stability	0.473335
GO:0035282	2.04563	0.395296	50	1	Ifitm1	segmentation	0.473335
GO:0048593	2.04563	0.395296	50	1	Bax	camera-type eye morphogenesis	0.473335
GO:0050708	2.04563	0.395296	50	1	Srgn	regulation of protein secretion	0.473335
GO:0008360	2.00427	0.401377	51	1	Myl12a	regulation of cell shape	0.477667
GO:0016042	2.00427	0.401377	51	1	Apoe	lipid catabolic process	0.477667
GO:0001822	1.47779	0.401858	138	2	Bax,Cd44	kidney development	0.477667
GO:0043010	1.47779	0.401858	138	2	Bax,Vim	camera-type eye development	0.477667
GO:0009411	1.96473	0.407398	52	1	Bax	response to UV	0.482484
GO:0030178	1.96473	0.407398	52	1	Lrp1	negative regulation of Wnt receptor signaling pathway	0.482484
GO:0006006	1.92662	0.413359	53	1	Fabp5	glucose metabolic process	0.485996
GO:0010631	1.92662	0.413359	53	1	Gpx1	epithelial cell migration	0.485996
GO:0042472	1.92662	0.413359	53	1	Rac1	inner ear morphogenesis	0.485996
GO:0048515	1.92662	0.413359	53	1	Bax	spermatid differentiation	0.485996
GO:0009165	1.88995	0.419261	54	1	G6pdx	nucleotide biosynthetic process	0.491156
GO:0016571	1.88995	0.419261	54	1	Dpy30	histone methylation	0.491156
GO:0001657	1.85465	0.425105	55	1	Cd44	ureteric bud development	0.491788
GO:0008154	1.85465	0.425105	55	1	Rac1	actin polymerization or depolymerization	0.491788
GO:0042089	1.85465	0.425105	55	1	Cebpb	cytokine biosynthetic process	0.491788
GO:0042107	1.85465	0.425105	55	1	Cebpb	cytokine metabolic process	0.491788
GO:0042552	1.85465	0.425105	55	1	Cd9	myelination	0.491788
GO:0071219	1.85465	0.425105	55	1	Fcgr2b	cellular response to molecule of bacterial origin	0.491788
GO:0072164	1.85465	0.425105	55	1	Cd44	mesonephric tubule development	0.491788
GO:0001823	1.82065	0.430891	56	1	Cd44	mesonephros development	0.49583
GO:0006643	1.82065	0.430891	56	1	Bax	membrane lipid metabolic process	0.49583
GO:0042742	1.82065	0.430891	56	1	Lyz2	defense response to bacterium	0.49583
GO:0001817	1.66389	0.433245	186	3	Srgn,Fcgr2b,Cebpb	regulation of cytokine production	0.497657
GO:0008366	1.78769	0.43662	57	1	Cd9	axon ensheathment	0.498885
GO:0009913	1.78769	0.43662	57	1	Rac1	epidermal cell differentiation	0.498885
GO:0031346	1.78769	0.43662	57	1	Rac1	positive regulation of cell projection organization	0.498885
GO:0007605	1.75606	0.442292	58	1	Gpx1	sensory perception of sound	0.501832
GO:0008344	1.75606	0.442292	58	1	Cstb	adult locomotory behavior	0.501832
GO:0018105	1.75606	0.442292	58	1	Bax	peptidyl-serine phosphorylation	0.501832
GO:0043524	1.75606	0.442292	58	1	Bax	negative regulation of neuron apoptotic process	0.501832
GO:0060047	1.72548	0.447909	59	1	Gpx1	heart contraction	0.506433
GO:0070613	1.72548	0.447909	59	1	C3	regulation of protein processing	0.506433
GO:0007009	1.69593	0.453469	60	1	Myl12a	plasma membrane organization	0.509172
GO:0042471	1.69593	0.453469	60	1	Rac1	ear morphogenesis	0.509172
GO:0055002	1.69593	0.453469	60	1	Gpx1	striated muscle cell development	0.509172
GO:0060041	1.69593	0.453469	60	1	Bax	retina development in camera-type eye	0.509172
GO:0030183	1.63974	0.464426	62	1	Bax	B cell differentiation	0.517891
GO:0046631	1.63974	0.464426	62	1	Anxa1	alpha-beta T cell activation	0.517891
GO:0051250	1.63974	0.464426	62	1	Fcgr2b	negative regulation of lymphocyte activation	0.517891
GO:0051606	1.63974	0.464426	62	1	Sod2	detection of stimulus	0.517891
GO:0006473	1.61301	0.469823	63	1	Nupr1	protein acetylation	0.520333
GO:0019228	1.61301	0.469823	63	1	Cd9	regulation of action potential in neuron	0.520333
GO:0048771	1.61301	0.469823	63	1	Bax	tissue remodeling	0.520333
GO:0050954	1.61301	0.469823	63	1	Gpx1	sensory perception of mechanical stimulus	0.520333
GO:0002699	1.53773	0.485696	66	1	C3	positive regulation of immune effector process	0.536996
GO:0051258	1.51415	0.490883	67	1	Rac1	protein polymerization	0.541808
GO:0006936	1.49129	0.496018	68	1	Myl6	muscle contraction	0.546546
GO:0072073	1.4691	0.501102	69	1	Cd44	kidney epithelium development	0.551212
GO:0001892	1.44755	0.506136	70	1	Cebpb	embryonic placenta development	0.553933
GO:0001894	1.44755	0.506136	70	1	Bax	tissue homeostasis	0.553933
GO:0007018	1.44755	0.506136	70	1	Ap3s1	microtubule-based movement	0.553933
GO:0006650	1.42662	0.51112	71	1	Fabp5	glycerophospholipid metabolic process	0.557508
GO:0048592	1.42662	0.51112	71	1	Bax	eye morphogenesis	0.557508
GO:0055001	1.40627	0.516055	72	1	Gpx1	muscle cell development	0.561946
GO:0001764	1.3865	0.52094	73	1	Bax	neuron migration	0.564425
GO:0006479	1.3865	0.52094	73	1	Dpy30	protein methylation	0.564425
GO:0016358	1.3865	0.52094	73	1	Rac1	dendrite development	0.564425
GO:0019226	1.36726	0.525778	74	1	Cd9	transmission of nerve impulse	0.56777
GO:0045786	1.36726	0.525778	74	1	Nupr1	negative regulation of cell cycle	0.56777
GO:0010001	1.34856	0.530567	75	1	Vim	glial cell differentiation	0.571041
GO:0042176	1.34856	0.530567	75	1	Serpinb1a	regulation of protein catabolic process	0.571041
GO:0009101	1.3126	0.540003	77	1	Itm2b	glycoprotein biosynthetic process	0.580235
GO:0003012	1.29533	0.544652	78	1	Myl6	muscle system process	0.582337
GO:0030534	1.29533	0.544652	78	1	Cstb	adult behavior	0.582337
GO:0048511	1.29533	0.544652	78	1	Bax	rhythmic process	0.582337
GO:0019827	1.27849	0.549253	79	1	Spi1	stem cell maintenance	0.585329
GO:2000027	1.27849	0.549253	79	1	Rac1	regulation of organ morphogenesis	0.585329
GO:0030111	1.24608	0.558321	81	1	Lrp1	regulation of Wnt receptor signaling pathway	0.594017
GO:0021953	1.23048	0.562787	82	1	Rac1	central nervous system neuron differentiation	0.597789
GO:0006644	1.21525	0.567209	83	1	Fabp5	phospholipid metabolic process	0.60052
GO:0035108	1.21525	0.567209	83	1	Bax	limb morphogenesis	0.60052
GO:0002573	1.20039	0.571587	84	1	Spi1	myeloid leukocyte differentiation	0.603187
GO:0019221	1.20039	0.571587	84	1	Ifitm3	cytokine-mediated signaling pathway	0.603187
GO:0060173	1.18589	0.575921	85	1	Bax	limb development	0.606774
GO:0030335	1.17173	0.580213	86	1	Tmsb4x	positive regulation of cell migration	0.610305
GO:0042098	1.15789	0.584461	87	1	Bax	T cell proliferation	0.613779
GO:0050678	1.13117	0.592832	89	1	Bax	regulation of epithelial cell proliferation	0.621564
GO:0032535	1.11826	0.596956	90	1	Rac1	regulation of cellular component size	0.623872
GO:2000147	1.11826	0.596956	90	1	Tmsb4x	positive regulation of cell motility	0.623872
GO:0007411	1.10564	0.601038	91	1	Rac1	axon guidance	0.626121
GO:0032496	1.10564	0.601038	91	1	Cebpb	response to lipopolysaccharide	0.626121
GO:0040017	1.06937	0.613042	94	1	Tmsb4x	positive regulation of locomotion	0.636583
GO:0051272	1.06937	0.613042	94	1	Tmsb4x	positive regulation of cellular component movement	0.636583
GO:0006631	1.05786	0.616964	95	1	Alox5ap	fatty acid metabolic process	0.639633
GO:0051346	1.04652	0.620848	96	1	Serpinb1a	negative regulation of hydrolase activity	0.642632
GO:0001667	1.03542	0.624692	97	1	Gpx1	ameboidal cell migration	0.644555
GO:0048839	1.03542	0.624692	97	1	Rac1	inner ear development	0.644555
GO:0072001	1.43452	0.652706	142	2	Bax,Cd44	renal system development	0.67239
GO:0055082	1.39366	0.657055	146	2	Apoe,Bax	cellular chemical homeostasis	0.674812
GO:0006605	1.3838	0.658176	147	2	Myl12a,Rab27a	protein targeting	0.674812
GO:0034097	1.3838	0.658176	147	2	Ifitm1,Ifitm3	response to cytokine stimulus	0.674812
GO:0007283	1.30954	0.667573	155	2	Bax,Ctsl	spermatogenesis	0.682291
GO:0042692	1.30954	0.667573	155	2	Tmsb4x,Gpx1	muscle cell differentiation	0.682291
GO:0048232	1.30079	0.668796	156	2	Bax,Ctsl	male gamete generation	0.682466
GO:0033993	1.29217	0.670029	157	2	Ctsl,Cebpb	response to lipid	0.682651
GO:0001654	1.25064	0.676327	162	2	Bax,Vim	eye development	0.687988
GO:0033365	1.22694	0.680202	165	2	Bax,Srgn	protein localization to organelle	0.690789
GO:0030099	1.21163	0.682822	167	2	Spi1,G6pdx	myeloid cell differentiation	0.690789
GO:0030900	1.21163	0.682822	167	2	Rac1,Bax	forebrain development	0.690789
GO:0001655	1.19667	0.685467	169	2	Bax,Cd44	urogenital system development	0.690789
GO:0006184	1.19667	0.685467	169	2	Rac1,Rab27a	GTP catabolic process	0.690789
GO:0019725	1.19667	0.685467	169	2	Apoe,Bax	cellular homeostasis	0.690789
GO:0009100	1.01391	1	99	1	Itm2b	glycoprotein metabolic process	1
GO:0009203	1.00884	1	199	2	Rac1,Rab27a	ribonucleoside triphosphate catabolic process	1
GO:0009416	1.01391	1	99	1	Bax	response to light stimulus	1
GO:0034220	1.01391	1	99	1	Bax	ion transmembrane transport	1
GO:0035264	1.01391	1	99	1	G6pdx	multicellular organism growth	1

## Sheet: 6h up hallmark
	odds.ratio	p.value	n.categoy	n.category.and.component	genes	FDR
HALLMARK_COAGULATION	5.59057	0.000581998	90	7	Rac1,Mmp8,Plek,C3,Anxa1,Cd9,Lrp1	0.0162959
HALLMARK_APOPTOSIS	4.0407	0.00180261	140	8	Bax,Cd44,Sod2,Anxa1,Ifitm3,Gsr,Lgals3,Gpx1	0.0229491
HALLMARK_COMPLEMENT	3.82955	0.00245883	147	8	Mmp8,Ctsd,Plek,C3,Ehd1,Lrp1,Lgals3,Cebpb	0.0229491
HALLMARK_P53_PATHWAY	2.99122	0.00959042	184	8	S100a4,Bax,Fam162a,Ctsd,Hint1,Pmm1,Nupr1,Rps27l	0.0608017
HALLMARK_MTORC1_SIGNALING	2.92124	0.0108574	188	8	Edem1,Cd9,Aldoa,Nupr1,Gsr,Slc7a5,Eno1,Hspe1	0.0608017
HALLMARK_REACTIVE_OXIGEN_SPECIES_PATHWAY	4.55512	0.0347418	44	3	Sod2,Mgst1,Gsr	0.162128
HALLMARK_TNFA_SIGNALING_VIA_NFKB	2.28002	0.0626764	173	6	Cd44,Sod2,Plek,Ehd1,Cebpb,Tubb2a	0.250706
HALLMARK_CHOLESTEROL_HOMEOSTASIS	3.14978	0.0807972	62	3	Fabp5,Cd9,Lgals3	0.278268
HALLMARK_XENOBIOTIC_METABOLISM	2.17692	0.0962953	149	5	Apoe,Por,Hsd11b1,Pmm1,Gsr	0.278268
HALLMARK_UNFOLDED_PROTEIN_RESPONSE	2.3716	0.102883	109	4	Edem1,Slc7a5,Cebpb,Tubb2a	0.278268
HALLMARK_EPITHELIAL_MESENCHYMAL_TRANSITION	2.08617	0.10932	155	5	Cd44,Vim,Emp3,Lrp1,Glipr1	0.278268
HALLMARK_UV_RESPONSE_UP	1.99707	0.157735	128	4	Sod2,Aldoa,Slc25a4,Rab27a	0.342462
HALLMARK_INTERFERON_ALPHA_RESPONSE	2.27996	0.159	84	3	Ifitm1,Ifitm3,Sell	0.342462
HALLMARK_HYPOXIA	1.9124	0.197883	168	5	S100a4,Fam162a,Aldoa,Anxa2,Eno1	0.381312
HALLMARK_GLYCOLYSIS	1.8644	0.204274	172	5	Fam162a,Cd44,Pygl,Aldoa,Eno1	0.381312
HALLMARK_INFLAMMATORY_RESPONSE	1.73465	0.302079	146	4	Cybb,Ifitm1,Sell,Emp3	0.477831
HALLMARK_ALLOGRAFT_REJECTION	1.70954	0.306254	148	4	Spi1,Srgn,Fcgr2b,Rpl39	0.477831
HALLMARK_ESTROGEN_RESPONSE_LATE	1.60466	0.326895	157	4	Cd44,Fabp5,Cd9,Slc7a5	0.477831
HALLMARK_IL6_JAK_STAT3_SIGNALING	1.73332	0.332882	72	2	Cd44,Cd9	0.477831
HALLMARK_ANGIOGENESIS	2.41508	0.351301	26	1	S100a4	0.477831
HALLMARK_IL2_STAT5_SIGNALING	1.48261	0.358374	169	4	Cd44,Ctsz,Ifitm3,Sell	0.477831
HALLMARK_PEROXISOME	1.49315	0.398636	83	2	Sod2,Slc25a4	0.507355
HALLMARK_ADIPOGENESIS	1.38536	0.538356	180	4	Apoe,Por,C3,Aldoa	0.642249
HALLMARK_MYC_TARGETS_V1	1.25001	0.56568	198	4	Snrpd1,Ap3s1,H2afz,Hspe1	0.642249
HALLMARK_TGF_BETA_SIGNALING	1.19923	0.573436	51	1	Id1	0.642249
HALLMARK_MYC_TARGETS_V2	1.04987	0.620885	58	1	Hspe1	0.668646
HALLMARK_ANDROGEN_RESPONSE	1.38776	0.65754	89	2	Myl12a,Gsr	0.681894
HALLMARK_HEME_METABOLISM	1.13512	0.748248	162	3	C3,Klf3,Nfe2	0.748248

## Sheet: 18h up GO
	odds.ratio	p.value	n.categoy	n.category.and.component	genes	description	FDR
GO:0002675	94.5491	6.04077e-07	10	4	C3,Adam8,Fcer1g,Fcgr3	positive regulation of acute inflammatory response	0.000273647
GO:0050764	25.9694	4.18497e-06	33	5	Calr,Cnn2,C3,Fcer1g,Fcgr3	regulation of phagocytosis	0.000947897
GO:0045087	10.0196	1.9563e-05	113	7	Mapkapk2,Myo1f,Adam8,Ifitm1,Ifitm3,Lcn2,Tlr2	innate immune response	0.00273321
GO:0050766	25.7898	3.93406e-05	26	4	Calr,C3,Fcer1g,Fcgr3	positive regulation of phagocytosis	0.00273321
GO:0002526	24.6694	4.59264e-05	27	4	C3,Adam8,Fcer1g,Fcgr3	acute inflammatory response	0.00273321
GO:0002438	59.3438	4.82686e-05	10	3	C3,Fcer1g,Fcgr3	acute inflammatory response to antigenic stimulus	0.00273321
GO:0002474	59.3438	4.82686e-05	10	3	Calr,Fcer1g,Fcgr3	antigen processing and presentation of peptide antigen via MHC class I	0.00273321
GO:0042119	59.3438	4.82686e-05	10	3	Myo1f,Tyrobp,Fcer1g	neutrophil activation	0.00273321
GO:0006909	13.9549	6.44642e-05	57	5	Calr,Cnn2,C3,Fcer1g,Fcgr3	phagocytosis	0.0032447
GO:0050729	21.023	8.05294e-05	31	4	C3,Adam8,Fcer1g,Fcgr3	positive regulation of inflammatory response	0.00364798
GO:0030100	11.879	0.000130769	66	5	Calr,Cnn2,C3,Fcer1g,Fcgr3	regulation of endocytosis	0.0053853
GO:0032675	16.6792	0.00018171	38	4	Mapkapk2,Tlr2,Cebpb,Fcer1g	regulation of interleukin-6 production	0.00682407
GO:0032680	16.2009	0.000201355	39	4	Mapkapk2,Tlr2,Fcer1g,Fcgr3	regulation of tumor necrosis factor production	0.00682407
GO:0006954	6.7057	0.000210898	164	7	Apoe,Mapkapk2,Pla2g7,C3,Adam8,Fcer1g,Fcgr3	inflammatory response	0.00682407
GO:0045807	14.9177	0.000269484	42	4	Calr,C3,Fcer1g,Fcgr3	positive regulation of endocytosis	0.0081384
GO:0050900	9.90619	0.000288658	78	5	Itgb2,Adam8,Tlr2,Fcer1g,Fcgr3	leukocyte migration	0.00817264
GO:0030595	12.3087	0.00053039	50	4	Itgb2,Adam8,Fcer1g,Fcgr3	leukocyte chemotaxis	0.0141333
GO:0050727	8.39016	0.000590858	91	5	Apoe,C3,Adam8,Fcer1g,Fcgr3	regulation of inflammatory response	0.0148699
GO:0002437	20.7778	0.000664583	23	3	C3,Fcer1g,Fcgr3	inflammatory response to antigenic stimulus	0.0150528
GO:0007229	20.7778	0.000664583	23	3	Itgb2,Tyrobp,Fcer1g	integrin-mediated signaling pathway	0.0150528
GO:0002764	7.74995	0.000829402	98	5	Mapkapk2,Adam8,Tlr2,Fcer1g,Fcgr3	immune response-regulating signaling pathway	0.0178914
GO:0006897	6.11231	0.000882638	150	6	Calr,Cnn2,Mapkapk2,C3,Fcer1g,Fcgr3	endocytosis	0.0181743
GO:0050778	6.02644	0.000946115	152	6	Mapkapk2,C3,Adam8,Tlr2,Fcer1g,Fcgr3	positive regulation of immune response	0.0186343
GO:0060326	10.2807	0.000997143	59	4	Itgb2,Adam8,Fcer1g,Fcgr3	cell chemotaxis	0.0188211
GO:0002253	7.27374	0.00108575	104	5	Mapkapk2,C3,Adam8,Tlr2,Fcer1g	activation of immune response	0.0196738
GO:0030593	15.9737	0.00132804	29	3	Itgb2,Fcer1g,Fcgr3	neutrophil chemotaxis	0.0222816
GO:0048002	15.9737	0.00132804	29	3	Calr,Fcer1g,Fcgr3	antigen processing and presentation of peptide antigen	0.0222816
GO:0002699	9.10964	0.00151897	66	4	C3,Tlr2,Fcer1g,Fcgr3	positive regulation of immune effector process	0.0245747
GO:0002443	6.53261	0.00170296	115	5	C3,Myo1f,Ctsc,Fcer1g,Fcgr3	leukocyte mediated immunity	0.0266014
GO:0071621	14.3193	0.00177414	32	3	Itgb2,Fcer1g,Fcgr3	granulocyte chemotaxis	0.0267896
GO:0060627	6.41372	0.00183826	117	5	Calr,Cnn2,C3,Fcer1g,Fcgr3	regulation of vesicle-mediated transport	0.0268624
GO:0045088	8.29823	0.0020974	72	4	Mapkapk2,Myo1f,Adam8,Tlr2	regulation of innate immune response	0.0296913
GO:0006739	33.799	0.00247611	10	2	Pgd,G6pdx	NADP metabolic process	0.032359
GO:0033198	33.799	0.00247611	10	2	Hsp90b1,Sell	response to ATP	0.032359
GO:0002821	12.575	0.00250014	36	3	C3,Fcer1g,Fcgr3	positive regulation of adaptive immune response	0.032359
GO:0001817	4.85852	0.00266692	186	6	Mapkapk2,Adam8,Tlr2,Cebpb,Fcer1g,Fcgr3	regulation of cytokine production	0.0335587
GO:0040012	4.72247	0.00304593	191	6	Cnn2,Myo1f,Adam8,Ifitm1,Ifitm3,Tlr2	regulation of locomotion	0.0365826
GO:0051050	4.69632	0.00312635	192	6	Calr,C3,Tlr2,Flna,Fcer1g,Fcgr3	positive regulation of transport	0.0365826
GO:0019882	11.5228	0.00314949	39	3	Calr,Fcer1g,Fcgr3	antigen processing and presentation	0.0365826
GO:0042743	27.0324	0.00359651	12	2	Cybb,Prdx5	hydrogen peroxide metabolic process	0.0397371
GO:0045123	27.0324	0.00359651	12	2	Itgb2,Adam8	cellular extravasation	0.0397371
GO:0002218	10.63	0.00389372	42	3	Mapkapk2,Adam8,Tlr2	activation of innate immune response	0.0419965
GO:0006911	22.544	0.00491093	14	2	Fcer1g,Fcgr3	phagocytosis, engulfment	0.0505602
GO:0032613	22.544	0.00491093	14	2	G6pdx,Fcer1g	interleukin-10 production	0.0505602
GO:0042035	9.63936	0.00504053	46	3	Tlr2,Cebpb,Fcgr3	regulation of cytokine biosynthetic process	0.0507413
GO:0016064	9.41772	0.00535572	47	3	C3,Fcer1g,Fcgr3	immunoglobulin mediated immune response	0.0517825
GO:0009620	20.8159	0.00563904	15	2	Tlr2,Cotl1	response to fungus	0.0517825
GO:0010324	20.8159	0.00563904	15	2	Fcer1g,Fcgr3	membrane invagination	0.0517825
GO:0032760	20.8159	0.00563904	15	2	Tlr2,Fcer1g	positive regulation of tumor necrosis factor production	0.0517825
GO:0042060	6.17688	0.00571551	95	4	Cnn2,Anxa2,F13a1,Fcer1g	wound healing	0.0517825
GO:0009617	4.82304	0.00585811	153	5	Mapkapk2,Myo1f,Tlr2,Cebpb,Fcer1g	response to bacterium	0.0520338
GO:0019724	9.0049	0.00602116	49	3	C3,Fcer1g,Fcgr3	B cell mediated immunity	0.0524536
GO:0007596	8.4492	0.00710864	52	3	Anxa2,F13a1,Fcer1g	blood coagulation	0.0595774
GO:0015844	18.0375	0.00723345	17	2	Fcer1g,Fcgr3	monoamine transport	0.0595774
GO:0048525	18.0375	0.00723345	17	2	Ifitm1,Ifitm3	negative regulation of viral reproduction	0.0595774
GO:0007599	8.27938	0.00749536	53	3	Anxa2,F13a1,Fcer1g	hemostasis	0.0606321
GO:0030334	4.48036	0.00782653	164	5	Cnn2,Myo1f,Adam8,Ifitm1,Tlr2	regulation of cell migration	0.0613527
GO:0002460	5.61225	0.00785531	104	4	C3,Ctsc,Fcer1g,Fcgr3	adaptive immune response based on somatic recombination of immune receptors built from immunoglobulin superfamily domains	0.0613527
GO:0040013	7.9585	0.00830573	55	3	Cnn2,Ifitm1,Ifitm3	negative regulation of locomotion	0.0616802
GO:0042089	7.9585	0.00830573	55	3	Tlr2,Cebpb,Fcgr3	cytokine biosynthetic process	0.0616802
GO:0042107	7.9585	0.00830573	55	3	Tlr2,Cebpb,Fcgr3	cytokine metabolic process	0.0616802
GO:0042742	7.80719	0.00872955	56	3	Myo1f,Tlr2,Fcer1g	defense response to bacterium	0.0637553
GO:0030193	15.915	0.00900737	19	2	Anxa2,Fcer1g	regulation of blood coagulation	0.0637553
GO:0042311	15.915	0.00900737	19	2	Apoe,G6pdx	vasodilation	0.0637553
GO:0045089	7.66153	0.00916591	57	3	Mapkapk2,Adam8,Tlr2	positive regulation of innate immune response	0.0638793
GO:0032615	15.0312	0.00995988	20	2	Tlr2,G6pdx	interleukin-12 production	0.0673407
GO:0045576	15.0312	0.00995988	20	2	Fcer1g,Fcgr3	mast cell activation	0.0673407
GO:0002250	5.14061	0.0104676	113	4	C3,Ctsc,Fcer1g,Fcgr3	adaptive immune response	0.0697327
GO:2000145	4.13198	0.0107014	177	5	Cnn2,Myo1f,Adam8,Ifitm1,Tlr2	regulation of cell motility	0.0698972
GO:0002367	14.241	0.0109552	21	2	Tlr2,Fcer1g	cytokine production involved in immune response	0.0698972
GO:0032755	14.241	0.0109552	21	2	Tlr2,Fcer1g	positive regulation of interleukin-6 production	0.0698972
GO:0002768	7.00494	0.0115384	62	3	Tlr2,Fcer1g,Fcgr3	immune response-regulating cell surface receptor signaling pathway	0.0725956
GO:0002687	13.53	0.0119926	22	2	Adam8,Tlr2	positive regulation of leukocyte migration	0.0744199
GO:0045055	12.8764	0.0130715	23	2	Myo1f,Fcer1g	regulated secretory pathway	0.0792251
GO:0002819	6.66401	0.0131167	65	3	C3,Fcer1g,Fcgr3	regulation of adaptive immune response	0.0792251
GO:0006749	12.2927	0.0141911	24	2	Mgst1,G6pdx	glutathione metabolic process	0.0824176
GO:0030433	12.2927	0.0141911	24	2	Hsp90b1,Edem1	ER-associated protein catabolic process	0.0824176
GO:0061041	12.2927	0.0141911	24	2	Anxa2,Fcer1g	regulation of wound healing	0.0824176
GO:0019884	11.7571	0.0153509	25	2	Fcer1g,Fcgr3	antigen processing and presentation of exogenous antigen	0.0875559
GO:0051270	3.74908	0.0154624	194	5	Cnn2,Myo1f,Adam8,Ifitm1,Tlr2	regulation of cellular component movement	0.0875559
GO:0045669	10.8176	0.0177881	27	2	Ifitm1,Cebpb	positive regulation of osteoblast differentiation	0.0989168
GO:0009615	5.89454	0.0179055	73	3	Ifitm1,Ifitm3,Lcn2	response to virus	0.0989168
GO:0019216	5.57216	0.0206202	77	3	Apoe,Psap,C3	regulation of lipid metabolic process	0.112541
GO:0050821	9.6546	0.0217289	30	2	Calr,Flna	protein stabilization	0.115802
GO:0050830	9.6546	0.0217289	30	2	Myo1f,Tlr2	defense response to Gram-positive bacterium	0.115802
GO:0042108	9.31862	0.023116	31	2	Tlr2,Fcgr3	positive regulation of cytokine biosynthetic process	0.121762
GO:0002224	8.71433	0.0259967	33	2	Mapkapk2,Tlr2	toll-like receptor signaling pathway	0.135362
GO:0002366	4.96023	0.0275158	86	3	Myo1f,Tyrobp,Fcer1g	leukocyte activation involved in immune response	0.140053
GO:0030335	4.96023	0.0275158	86	3	Myo1f,Adam8,Tlr2	positive regulation of cell migration	0.140053
GO:0001819	4.90038	0.0283494	87	3	Adam8,Tlr2,Fcer1g	positive regulation of cytokine production	0.142692
GO:0010954	8.18407	0.0290155	35	2	C3,Adam8	positive regulation of protein processing	0.14376
GO:0006979	4.84191	0.0291964	88	3	Apoe,Prdx5,G6pdx	response to oxidative stress	0.14376
GO:0001909	7.94225	0.0305752	36	2	Ctsc,Fcgr3	leukocyte mediated cytotoxicity	0.148931
GO:2000147	4.72835	0.0309306	90	3	Myo1f,Adam8,Tlr2	positive regulation of cell motility	0.149059
GO:0040017	4.51805	0.0345596	94	3	Myo1f,Adam8,Tlr2	positive regulation of locomotion	0.162205
GO:0051272	4.51805	0.0345596	94	3	Myo1f,Adam8,Tlr2	positive regulation of cellular component movement	0.162205
GO:0035150	7.29572	0.0354488	39	2	Apoe,G6pdx	regulation of tube size	0.162205
GO:0050880	7.29572	0.0354488	39	2	Apoe,G6pdx	regulation of blood vessel size	0.162205
GO:0051651	7.29572	0.0354488	39	2	Apoe,Flna	maintenance of location in cell	0.162205
GO:0071229	7.1031	0.0371363	40	2	Anxa2,Cebpb	cellular response to acid	0.167839
GO:0050878	4.37139	0.0374211	97	3	Anxa2,F13a1,Fcer1g	regulation of body fluid levels	0.167839
GO:0006935	3.34129	0.0399432	170	4	Itgb2,Adam8,Fcer1g,Fcgr3	chemotaxis	0.176854
GO:0015758	6.74422	0.0406024	42	2	C3,Fabp5	glucose transport	0.176854
GO:0016051	6.74422	0.0406024	42	2	Pgd,G6pdx	carbohydrate biosynthetic process	0.176854
GO:0032388	6.57926	0.0423799	43	2	Flna,Fcer1g	positive regulation of intracellular transport	0.182839
GO:0051607	6.42159	0.0441863	44	2	Ifitm1,Ifitm3	defense response to virus	0.188834
GO:0002237	4.023	0.0456301	105	3	Mapkapk2,Tlr2,Cebpb	response to molecule of bacterial origin	0.191311
GO:0006518	6.27125	0.0460212	45	2	Mgst1,G6pdx	peptide metabolic process	0.191311
GO:0005975	3.18302	0.046033	178	4	Pygl,Fabp5,Pgd,G6pdx	carbohydrate metabolic process	0.191311
GO:0008643	6.12776	0.0478839	46	2	C3,Fabp5	carbohydrate transport	0.197195
GO:0071417	3.90603	0.0489222	108	3	Hsp90b1,Tlr2,Cebpb	cellular response to organic nitrogen	0.199537
GO:0006401	5.99063	0.0497741	47	2	Rnaset2b,Rnaset2a	RNA catabolic process	0.199537
GO:0030336	5.99063	0.0497741	47	2	Cnn2,Ifitm1	negative regulation of cell migration	0.199537
GO:2000146	5.85947	0.0516911	48	2	Cnn2,Ifitm1	negative regulation of cell motility	0.205404
GO:0031647	5.61353	0.0556038	50	2	Calr,Flna	regulation of protein stability	0.214403
GO:0045667	5.61353	0.0556038	50	2	Ifitm1,Cebpb	regulation of osteoblast differentiation	0.214403
GO:0051271	5.61353	0.0556038	50	2	Cnn2,Ifitm1	negative regulation of cellular component movement	0.214403
GO:0006520	3.69122	0.0558489	114	3	Mgst1,P4hb,G6pdx	cellular amino acid metabolic process	0.214403
GO:0006006	5.28143	0.0616621	53	2	Fabp5,Pgd	glucose metabolic process	0.23473
GO:0072593	5.08056	0.0658215	55	2	Cybb,Prdx5	reactive oxygen species metabolic process	0.248476
GO:0014070	3.32369	0.0710281	126	3	Hsp90b1,Sell,Prkcg	response to organic cyclic compound	0.253453
GO:0040014	4.80523	0.0722324	58	2	Apoe,G6pdx	regulation of multicellular organism growth	0.253453
GO:0043524	4.80523	0.0722324	58	2	Adam8,Prkcg	negative regulation of neuron apoptotic process	0.253453
GO:0000768	14.6983	0.0740011	10	1	Adam8	syncytium formation by plasma membrane fusion	0.253453
GO:0006910	14.6983	0.0740011	10	1	Fcgr3	phagocytosis, recognition	0.253453
GO:0030866	14.6983	0.0740011	10	1	Calr	cortical actin cytoskeleton organization	0.253453
GO:0032722	14.6983	0.0740011	10	1	Tlr2	positive regulation of chemokine production	0.253453
GO:0045777	14.6983	0.0740011	10	1	G6pdx	positive regulation of blood pressure	0.253453
GO:0070242	14.6983	0.0740011	10	1	Adam8	thymocyte apoptotic process	0.253453
GO:0070301	14.6983	0.0740011	10	1	Prdx5	cellular response to hydrogen peroxide	0.253453
GO:2000401	14.6983	0.0740011	10	1	Adam8	regulation of lymphocyte migration	0.253453
GO:0051222	4.72018	0.0744133	59	2	Tlr2,Flna	positive regulation of protein transport	0.253453
GO:0070613	4.72018	0.0744133	59	2	C3,Adam8	regulation of protein processing	0.253453
GO:0003081	13.2227	0.0811	11	1	G6pdx	regulation of systemic arterial blood pressure by renin-angiotensin	0.256911
GO:0006949	13.2227	0.0811	11	1	Adam8	syncytium formation	0.256911
GO:0010828	13.2227	0.0811	11	1	C3	positive regulation of glucose transport	0.256911
GO:0019432	13.2227	0.0811	11	1	C3	triglyceride biosynthetic process	0.256911
GO:0034394	13.2227	0.0811	11	1	Flna	protein localization to cell surface	0.256911
GO:0043304	13.2227	0.0811	11	1	Fcer1g	regulation of mast cell degranulation	0.256911
GO:0045071	13.2227	0.0811	11	1	Ifitm1	negative regulation of viral genome replication	0.256911
GO:0045429	13.2227	0.0811	11	1	Tlr2	positive regulation of nitric oxide biosynthetic process	0.256911
GO:0060742	13.2227	0.0811	11	1	Psap	epithelial cell differentiation involved in prostate gland development	0.256911
GO:0090207	13.2227	0.0811	11	1	C3	regulation of triglyceride metabolic process	0.256911
GO:0034504	4.3359	0.0856278	64	2	Calr,Flna	protein localization to nucleus	0.269371
GO:0002446	12.0239	0.0881458	12	1	Myo1f	neutrophil mediated immunity	0.269798
GO:0030865	12.0239	0.0881458	12	1	Calr	cortical cytoskeleton organization	0.269798
GO:0046470	12.0239	0.0881458	12	1	Fabp5	phosphatidylcholine metabolic process	0.269798
GO:0048821	12.0239	0.0881458	12	1	G6pdx	erythrocyte development	0.269798
GO:0007212	11.0229	0.0951388	13	1	Flna	dopamine receptor signaling pathway	0.276268
GO:0010543	11.0229	0.0951388	13	1	Fcer1g	regulation of platelet activation	0.276268
GO:0043303	11.0229	0.0951388	13	1	Fcer1g	mast cell degranulation	0.276268
GO:0045022	11.0229	0.0951388	13	1	Flna	early endosome to late endosome transport	0.276268
GO:0045124	11.0229	0.0951388	13	1	Adam8	regulation of bone resorption	0.276268
GO:0045214	11.0229	0.0951388	13	1	Actg1	sarcomere organization	0.276268
GO:0072676	11.0229	0.0951388	13	1	Adam8	lymphocyte migration	0.276268
GO:0090398	11.0229	0.0951388	13	1	Calr	cellular senescence	0.276268
GO:0002920	10.1729	0.102079	14	1	C3	regulation of humoral immune response	0.287133
GO:0019886	10.1729	0.102079	14	1	Fcer1g	antigen processing and presentation of exogenous peptide antigen via MHC class II	0.287133
GO:0035456	10.1729	0.102079	14	1	Ifitm1	response to interferon-beta	0.287133
GO:0043666	10.1729	0.102079	14	1	Hsp90b1	regulation of phosphoprotein phosphatase activity	0.287133
GO:0070232	10.1729	0.102079	14	1	Adam8	regulation of T cell apoptotic process	0.287133
GO:0033003	9.44723	0.108968	15	1	Fcer1g	regulation of mast cell activation	0.287133
GO:0033081	9.44723	0.108968	15	1	Adam8	regulation of T cell differentiation in thymus	0.287133
GO:0040020	9.44723	0.108968	15	1	Calr	regulation of meiosis	0.287133
GO:0044130	9.44723	0.108968	15	1	Tlr2	negative regulation of growth of symbiont in host	0.287133
GO:0044146	9.44723	0.108968	15	1	Tlr2	negative regulation of growth of symbiont involved in interaction with host	0.287133
GO:0046164	9.44723	0.108968	15	1	Apoe	alcohol catabolic process	0.287133
GO:0048265	9.44723	0.108968	15	1	Prkcg	response to pain	0.287133
GO:0001101	3.72744	0.109442	74	2	Anxa2,Cebpb	response to acid	0.287133
GO:0042176	3.67583	0.111913	75	2	Adam8,Flna	regulation of protein catabolic process	0.287133
GO:0010608	2.69364	0.112714	154	3	Calr,Mapkapk2,Flna	posttranscriptional regulation of gene expression	0.287133
GO:0002532	8.81561	0.115805	16	1	Fcer1g	production of molecular mediator involved in inflammatory response	0.287133
GO:0010883	8.81561	0.115805	16	1	C3	regulation of lipid storage	0.287133
GO:0033032	8.81561	0.115805	16	1	Fcer1g	regulation of myeloid cell apoptotic process	0.287133
GO:0033344	8.81561	0.115805	16	1	Apoe	cholesterol efflux	0.287133
GO:0042307	8.81561	0.115805	16	1	Flna	positive regulation of protein import into nucleus	0.287133
GO:0042310	8.81561	0.115805	16	1	G6pdx	vasoconstriction	0.287133
GO:0046850	8.81561	0.115805	16	1	Adam8	regulation of bone remodeling	0.287133
GO:0071453	8.81561	0.115805	16	1	Adam8	cellular response to oxygen levels	0.287133
GO:0071456	8.81561	0.115805	16	1	Adam8	cellular response to hypoxia	0.287133
GO:0097006	8.81561	0.115805	16	1	Apoe	regulation of plasma lipoprotein particle levels	0.287133
GO:2000108	8.81561	0.115805	16	1	Adam8	positive regulation of leukocyte apoptotic process	0.287133
GO:0001525	2.65744	0.115994	156	3	C3,Adam8,Anxa2	angiogenesis	0.287133
GO:0051047	3.576	0.1169	77	2	Tlr2,Fcer1g	positive regulation of secretion	0.287803
GO:0000045	8.26524	0.122591	17	1	Ctsd	autophagic vacuole assembly	0.289237
GO:0002495	8.26524	0.122591	17	1	Fcer1g	antigen processing and presentation of peptide antigen via MHC class II	0.289237
GO:0006509	8.26524	0.122591	17	1	Adam8	membrane protein ectodomain proteolysis	0.289237
GO:0033028	8.26524	0.122591	17	1	Fcer1g	myeloid cell apoptotic process	0.289237
GO:0044117	8.26524	0.122591	17	1	Tlr2	growth of symbiont in host	0.289237
GO:0045069	8.26524	0.122591	17	1	Ifitm1	regulation of viral genome replication	0.289237
GO:0045428	8.26524	0.122591	17	1	Tlr2	regulation of nitric oxide biosynthetic process	0.289237
GO:0045921	8.26524	0.122591	17	1	Fcer1g	positive regulation of exocytosis	0.289237
GO:0001649	3.43697	0.124486	80	2	Ifitm1,Cebpb	osteoblast differentiation	0.292187
GO:0007052	7.77706	0.129326	18	1	Flna	mitotic spindle organization	0.298036
GO:0019079	7.77706	0.129326	18	1	Ifitm1	viral genome replication	0.298036
GO:0030239	7.77706	0.129326	18	1	Actg1	myofibril assembly	0.298036
GO:0032970	3.34986	0.129609	82	2	Cnn2,Myo1f	regulation of actin filament-based process	0.298036
GO:0030278	3.30792	0.13219	83	2	Ifitm1,Cebpb	regulation of ossification	0.302434
GO:0001913	7.34474	0.13601	19	1	Ctsc	T cell mediated cytotoxicity	0.305012
GO:0007566	7.34474	0.13601	19	1	Grn	embryo implantation	0.305012
GO:0031572	7.34474	0.13601	19	1	Mapkapk2	G2/M transition DNA damage checkpoint	0.305012
GO:0043488	7.34474	0.13601	19	1	Mapkapk2	regulation of mRNA stability	0.305012
GO:0043523	3.18809	0.140003	86	2	Adam8,Prkcg	regulation of neuron apoptotic process	0.307275
GO:0018208	6.95546	0.142644	20	1	P4hb	peptidyl-proline modification	0.307275
GO:0031032	6.95546	0.142644	20	1	Actg1	actomyosin structure organization	0.307275
GO:0042177	6.95546	0.142644	20	1	Flna	negative regulation of protein catabolic process	0.307275
GO:0043113	6.95546	0.142644	20	1	Flna	receptor clustering	0.307275
GO:0043487	6.95546	0.142644	20	1	Mapkapk2	regulation of RNA stability	0.307275
GO:0050798	6.95546	0.142644	20	1	Itgb2	activated T cell proliferation	0.307275
GO:0002262	3.11284	0.145268	88	2	G6pdx,Fcer1g	myeloid cell homeostasis	0.307275
GO:1901214	3.07651	0.147917	89	2	Adam8,Prkcg	regulation of neuron death	0.307275
GO:0030199	6.608	0.149229	21	1	Anxa2	collagen fibril organization	0.307275
GO:0032642	6.608	0.149229	21	1	Tlr2	regulation of chemokine production	0.307275
GO:0033598	6.608	0.149229	21	1	Cebpb	mammary gland epithelial cell proliferation	0.307275
GO:0033619	6.608	0.149229	21	1	Adam8	membrane protein proteolysis	0.307275
GO:0034341	6.608	0.149229	21	1	Ifitm1	response to interferon-gamma	0.307275
GO:0042116	6.608	0.149229	21	1	Tyrobp	macrophage activation	0.307275
GO:0042542	6.608	0.149229	21	1	Prdx5	response to hydrogen peroxide	0.307275
GO:0043279	6.608	0.149229	21	1	Prkcg	response to alkaloid	0.307275
GO:2000107	6.608	0.149229	21	1	Fcer1g	negative regulation of leukocyte apoptotic process	0.307275
GO:0032496	3.00632	0.153244	91	2	Mapkapk2,Cebpb	response to lipopolysaccharide	0.314116
GO:0005977	6.00566	0.16225	23	1	Pygl	glycogen metabolic process	0.327962
GO:0051897	6.00566	0.16225	23	1	Adam8	positive regulation of protein kinase B signaling cascade	0.327962
GO:0006790	2.87499	0.164013	95	2	Mgst1,G6pdx	sulfur compound metabolic process	0.327962
GO:0006887	2.87499	0.164013	95	2	Myo1f,Fcer1g	exocytosis	0.327962
GO:0030198	2.84391	0.166727	96	2	Anxa2,Lgals3	extracellular matrix organization	0.327962
GO:0061024	2.22238	0.167305	185	3	Flna,Fcer1g,Fcgr3	membrane organization	0.327962
GO:0006112	5.74377	0.168687	24	1	Pygl	energy reserve metabolic process	0.327962
GO:0006809	5.74377	0.168687	24	1	Tlr2	nitric oxide biosynthetic process	0.327962
GO:0034614	5.74377	0.168687	24	1	Prdx5	cellular response to reactive oxygen species	0.327962
GO:0042990	5.74377	0.168687	24	1	Flna	regulation of transcription factor import into nucleus	0.327962
GO:0045453	5.74377	0.168687	24	1	Adam8	bone resorption	0.327962
GO:0050873	5.74377	0.168687	24	1	Cebpb	brown fat cell differentiation	0.327962
GO:0015918	5.5044	0.175076	25	1	Apoe	sterol transport	0.329085
GO:0016236	5.5044	0.175076	25	1	Ctsd	macroautophagy	0.329085
GO:0019218	5.5044	0.175076	25	1	Apoe	regulation of steroid metabolic process	0.329085
GO:0030301	5.5044	0.175076	25	1	Apoe	cholesterol transport	0.329085
GO:0048844	5.5044	0.175076	25	1	Apoe	artery morphogenesis	0.329085
GO:0050715	5.5044	0.175076	25	1	Tlr2	positive regulation of cytokine secretion	0.329085
GO:0051225	5.5044	0.175076	25	1	Flna	spindle assembly	0.329085
GO:0071230	5.5044	0.175076	25	1	Cebpb	cellular response to amino acid stimulus	0.329085
GO:0051402	2.7258	0.177662	100	2	Adam8,Prkcg	neuron apoptotic process	0.332566
GO:0003014	5.28353	0.181417	26	1	G6pdx	renal system process	0.336811
GO:0045766	5.28353	0.181417	26	1	C3	positive regulation of angiogenesis	0.336811
GO:0007015	2.64346	0.185939	103	2	Hsp90b1,Flna	actin filament organization	0.343798
GO:0070997	2.61708	0.188712	104	2	Adam8,Prkcg	neuron death	0.347282
GO:0043161	2.59115	0.19149	105	2	Hsp90b1,Edem1	proteasomal ubiquitin-dependent protein catabolic process	0.347282
GO:0051051	2.59115	0.19149	105	2	Cnn2,Flna	negative regulation of transport	0.347282
GO:0010827	4.88975	0.193956	28	1	C3	regulation of glucose transport	0.347282
GO:0016052	4.88975	0.193956	28	1	Pgd	carbohydrate catabolic process	0.347282
GO:0019915	4.88975	0.193956	28	1	C3	lipid storage	0.347282
GO:0031532	4.88975	0.193956	28	1	Flna	actin cytoskeleton reorganization	0.347282
GO:0090316	4.88975	0.193956	28	1	Flna	positive regulation of intracellular protein transport	0.347282
GO:0010498	2.5166	0.199859	108	2	Hsp90b1,Edem1	proteasomal protein catabolic process	0.348733
GO:0006576	4.71465	0.200156	29	1	Fabp5	cellular biogenic amine metabolic process	0.348733
GO:0009612	4.71465	0.200156	29	1	Cnn2	response to mechanical stimulus	0.348733
GO:0030168	4.71465	0.200156	29	1	Fcer1g	platelet activation	0.348733
GO:0042158	4.71465	0.200156	29	1	Apoe	lipoprotein biosynthetic process	0.348733
GO:0042632	4.71465	0.200156	29	1	Apoe	cholesterol homeostasis	0.348733
GO:0060840	4.71465	0.200156	29	1	Apoe	artery development	0.348733
GO:0033555	4.55082	0.206308	30	1	Prkcg	multicellular organismal response to stress	0.355352
GO:0045862	4.55082	0.206308	30	1	Adam8	positive regulation of proteolysis	0.355352
GO:0055092	4.55082	0.206308	30	1	Apoe	sterol homeostasis	0.355352
GO:0055114	2.44587	0.208274	111	2	Pygl,Pgd	oxidation-reduction process	0.357379
GO:0051223	2.42325	0.211088	112	2	Tlr2,Flna	regulation of protein transport	0.360842
GO:0006959	4.39915	0.212415	31	1	C3	humoral immune response	0.361744
GO:0050673	2.37918	0.216729	114	2	Grn,Cebpb	epithelial cell proliferation	0.363858
GO:0002456	4.25647	0.218475	32	1	Ctsc	T cell mediated immunity	0.363858
GO:0022407	4.25647	0.218475	32	1	Adam8	regulation of cell-cell adhesion	0.363858
GO:0043200	4.25647	0.218475	32	1	Cebpb	response to amino acid stimulus	0.363858
GO:0046849	4.25647	0.218475	32	1	Adam8	bone remodeling	0.363858
GO:0050714	4.25647	0.218475	32	1	Tlr2	positive regulation of protein secretion	0.363858
GO:0032507	4.12261	0.22449	33	1	Flna	maintenance of protein location in cell	0.369797
GO:0045834	4.12261	0.22449	33	1	Apoe	positive regulation of lipid metabolic process	0.369797
GO:0050707	4.12261	0.22449	33	1	Tlr2	regulation of cytokine secretion	0.369797
GO:0003073	3.99723	0.23046	34	1	G6pdx	regulation of systemic arterial blood pressure	0.372851
GO:0007162	3.99723	0.23046	34	1	Myo1f	negative regulation of cell adhesion	0.372851
GO:0007188	3.99723	0.23046	34	1	Flna	adenylate cyclase-modulating G-protein coupled receptor signaling pathway	0.372851
GO:0030850	3.99723	0.23046	34	1	Psap	prostate gland development	0.372851
GO:0046890	3.99723	0.23046	34	1	C3	regulation of lipid biosynthetic process	0.372851
GO:0006641	3.87905	0.236385	35	1	C3	triglyceride metabolic process	0.37705
GO:0021675	3.87905	0.236385	35	1	Prkcg	nerve development	0.37705
GO:0042157	3.87905	0.236385	35	1	Apoe	lipoprotein metabolic process	0.37705
GO:0045787	3.87905	0.236385	35	1	Calr	positive regulation of cell cycle	0.37705
GO:0051090	2.21751	0.239427	122	2	Adam8,Flna	regulation of sequence-specific DNA binding transcription factor activity	0.380563
GO:0051099	3.76767	0.242265	36	1	Anxa2	positive regulation of binding	0.383379
GO:0008015	2.18031	0.245126	124	2	Apoe,G6pdx	blood circulation	0.383379
GO:0070201	2.16218	0.247979	125	2	Tlr2,Flna	regulation of establishment of protein localization	0.383379
GO:0009308	3.66254	0.248101	37	1	Fabp5	amine metabolic process	0.383379
GO:0030316	3.66254	0.248101	37	1	Adam8	osteoclast differentiation	0.383379
GO:0050728	3.66254	0.248101	37	1	Apoe	negative regulation of inflammatory response	0.383379
GO:0051092	3.66254	0.248101	37	1	Adam8	positive regulation of NF-kappaB transcription factor activity	0.383379
GO:0001756	3.5624	0.253893	38	1	Ifitm1	somitogenesis	0.383379
GO:0001837	3.5624	0.253893	38	1	Flna	epithelial to mesenchymal transition	0.383379
GO:0008037	3.5624	0.253893	38	1	Fcgr3	cell recognition	0.383379
GO:0008203	3.5624	0.253893	38	1	Apoe	cholesterol metabolic process	0.383379
GO:0008277	3.5624	0.253893	38	1	C3	regulation of G-protein coupled receptor protein signaling pathway	0.383379
GO:0045582	3.5624	0.253893	38	1	Adam8	positive regulation of T cell differentiation	0.383379
GO:0045732	3.5624	0.253893	38	1	Adam8	positive regulation of protein catabolic process	0.383379
GO:0051896	3.5624	0.253893	38	1	Adam8	regulation of protein kinase B signaling cascade	0.383379
GO:0030155	2.10955	0.256545	128	2	Myo1f,Adam8	regulation of cell adhesion	0.386096
GO:0007569	3.37894	0.265347	40	1	Calr	cell aging	0.394106
GO:0016125	3.37894	0.265347	40	1	Apoe	sterol metabolic process	0.394106
GO:0030258	3.37894	0.265347	40	1	Apoe	lipid modification	0.394106
GO:0045185	3.37894	0.265347	40	1	Flna	maintenance of protein location	0.394106
GO:0016337	2.04315	0.26798	132	2	Itgb2,Adam8	cell-cell adhesion	0.396023
GO:0000302	3.29391	0.271009	41	1	Prdx5	response to reactive oxygen species	0.396023
GO:0006639	3.29391	0.271009	41	1	C3	acylglycerol metabolic process	0.396023
GO:0009267	3.29391	0.271009	41	1	Ctsd	cellular response to starvation	0.396023
GO:0034599	3.29391	0.271009	41	1	Prdx5	cellular response to oxidative stress	0.396023
GO:0016485	1.99599	0.276559	135	2	C3,Adam8	protein processing	0.397819
GO:0043433	3.21302	0.276629	42	1	Flna	negative regulation of sequence-specific DNA binding transcription factor activity	0.397819
GO:0046474	3.21302	0.276629	42	1	Fabp5	glycerophospholipid biosynthetic process	0.397819
GO:0055088	3.21302	0.276629	42	1	Apoe	lipid homeostasis	0.397819
GO:0061053	3.21302	0.276629	42	1	Ifitm1	somite development	0.397819
GO:0000077	3.13598	0.282206	43	1	Mapkapk2	DNA damage checkpoint	0.400751
GO:0006638	3.13598	0.282206	43	1	C3	neutral lipid metabolic process	0.400751
GO:0043123	3.13598	0.282206	43	1	Flna	positive regulation of I-kappaB kinase/NF-kappaB cascade	0.400751
GO:0050663	3.13598	0.282206	43	1	Tlr2	cytokine secretion	0.400751
GO:0042594	3.06252	0.287742	44	1	Ctsd	response to starvation	0.407334
GO:0051604	1.92194	0.290852	140	2	C3,Adam8	protein maturation	0.407471
GO:0001818	2.99242	0.293235	45	1	Tlr2	negative regulation of cytokine production	0.407471
GO:0007033	2.99242	0.293235	45	1	Ctsd	vacuole organization	0.407471
GO:0034976	2.99242	0.293235	45	1	Cebpb	response to endoplasmic reticulum stress	0.407471
GO:0042306	2.99242	0.293235	45	1	Flna	regulation of protein import into nucleus	0.407471
GO:0045621	2.99242	0.293235	45	1	Adam8	positive regulation of lymphocyte differentiation	0.407471
GO:0006914	2.92542	0.298688	46	1	Ctsd	autophagy	0.411263
GO:0007051	2.92542	0.298688	46	1	Flna	spindle organization	0.411263
GO:0050679	2.92542	0.298688	46	1	Grn	positive regulation of epithelial cell proliferation	0.411263
GO:0000187	2.86135	0.304099	47	1	Adam8	activation of MAPK activity	0.41493
GO:0008654	2.86135	0.304099	47	1	Fabp5	phospholipid biosynthetic process	0.41493
GO:0030073	2.86135	0.304099	47	1	Il1rn	insulin secretion	0.41493
GO:0048872	1.85311	0.305121	145	2	G6pdx,Fcer1g	homeostasis of number of cells	0.415075
GO:0008610	1.83993	0.307971	146	2	C3,Fabp5	lipid biosynthetic process	0.415341
GO:0017157	2.8	0.309469	48	1	Fcer1g	regulation of exocytosis	0.415341
GO:0031669	2.8	0.309469	48	1	Ctsd	cellular response to nutrient levels	0.415341
GO:0043491	2.8	0.309469	48	1	Adam8	protein kinase B signaling cascade	0.415341
GO:0001503	1.82672	0.310818	147	2	Ifitm1,Cebpb	ossification	0.415341
GO:0034097	1.82672	0.310818	147	2	Ifitm1,Ifitm3	response to cytokine stimulus	0.415341
GO:0001666	2.68475	0.320089	50	1	Adam8	response to hypoxia	0.421512
GO:0007565	2.68475	0.320089	50	1	Grn	female pregnancy	0.421512
GO:0008217	2.68475	0.320089	50	1	G6pdx	regulation of blood pressure	0.421512
GO:0035282	2.68475	0.320089	50	1	Ifitm1	segmentation	0.421512
GO:0050708	2.68475	0.320089	50	1	Tlr2	regulation of protein secretion	0.421512
GO:0016042	2.63063	0.325339	51	1	Apoe	lipid catabolic process	0.427184
GO:0010921	2.57862	0.330549	52	1	Hsp90b1	regulation of phosphatase activity	0.430464
GO:0061180	2.57862	0.330549	52	1	Cebpb	mammary gland epithelium development	0.430464
GO:0007186	1.74047	0.330687	154	2	C3,Flna	G-protein coupled receptor signaling pathway	0.430464
GO:0051046	1.72877	0.333515	155	2	Tlr2,Fcer1g	regulation of secretion	0.432901
GO:0007160	2.5285	0.33572	53	1	Adam8	cell-matrix adhesion	0.433279
GO:0033077	2.5285	0.33572	53	1	Adam8	T cell differentiation in thymus	0.433279
GO:0033993	1.70584	0.339162	157	2	Mapkapk2,Cebpb	response to lipid	0.433724
GO:0001776	2.48049	0.340852	54	1	Fcer1g	leukocyte homeostasis	0.433724
GO:0006869	2.48049	0.340852	54	1	Apoe	lipid transport	0.433724
GO:0009165	2.48049	0.340852	54	1	G6pdx	nucleotide biosynthetic process	0.433724
GO:0030072	2.48049	0.340852	54	1	Il1rn	peptide hormone secretion	0.433724
GO:0071219	2.43421	0.345945	55	1	Tlr2	cellular response to molecule of bacterial origin	0.438972
GO:0042493	2.38933	0.350999	56	1	Tlr2	response to drug	0.441674
GO:0045765	2.38933	0.350999	56	1	C3	regulation of angiogenesis	0.441674
GO:0051260	2.38933	0.350999	56	1	Mgst1	protein homooligomerization	0.441674
GO:0032880	1.65102	0.35322	162	2	Tlr2,Flna	regulation of protein localization	0.443238
GO:0002790	2.34633	0.356016	57	1	Il1rn	peptide secretion	0.445512
GO:0007568	2.3048	0.360995	58	1	Calr	aging	0.447568
GO:0045580	2.3048	0.360995	58	1	Adam8	regulation of T cell differentiation	0.447568
GO:0045785	2.3048	0.360995	58	1	Adam8	positive regulation of cell adhesion	0.447568
GO:0033365	1.61974	0.361611	165	2	Calr,Flna	protein localization to organelle	0.447568
GO:0001824	2.26468	0.365936	59	1	Grn	blastocyst development	0.449238
GO:0016197	2.26468	0.365936	59	1	Flna	endosomal transport	0.449238
GO:0051302	2.26468	0.365936	59	1	Calr	regulation of cell division	0.449238
GO:0030099	1.59952	0.367184	167	2	Adam8,G6pdx	myeloid cell differentiation	0.449553
GO:0035303	2.22585	0.370839	60	1	Hsp90b1	regulation of dephosphorylation	0.450376
GO:0055002	2.22585	0.370839	60	1	Actg1	striated muscle cell development	0.450376
GO:0071407	2.22585	0.370839	60	1	Hsp90b1	cellular response to organic cyclic compound	0.450376
GO:0006511	1.57978	0.372741	169	2	Hsp90b1,Edem1	ubiquitin-dependent protein catabolic process	0.451475
GO:0031667	2.15222	0.380536	62	1	Ctsd	response to nutrient levels	0.458465
GO:0051091	2.15222	0.380536	62	1	Adam8	positive regulation of sequence-specific DNA binding transcription factor activity	0.458465
GO:0031668	2.11711	0.385329	63	1	Ctsd	cellular response to extracellular stimulus	0.460565
GO:0046822	2.11711	0.385329	63	1	Flna	regulation of nucleocytoplasmic transport	0.460565
GO:0048771	2.11711	0.385329	63	1	Adam8	tissue remodeling	0.460565
GO:0019941	1.53244	0.386551	174	2	Hsp90b1,Edem1	modification-dependent protein catabolic process	0.46081
GO:0015833	2.08313	0.390087	64	1	Il1rn	peptide transport	0.463804
GO:0014031	2.05022	0.394808	65	1	Flna	mesenchymal cell development	0.468188
GO:0043122	1.98739	0.404143	67	1	Flna	regulation of I-kappaB kinase/NF-kappaB cascade	0.478008
GO:0030218	1.95739	0.408758	68	1	G6pdx	erythrocyte differentiation	0.482207
GO:0000075	1.92826	0.413338	69	1	Mapkapk2	cell cycle checkpoint	0.485083
GO:0046879	1.92826	0.413338	69	1	Il1rn	hormone secretion	0.485083
GO:0001892	1.89999	0.417884	70	1	Cebpb	embryonic placenta development	0.48789
GO:0001894	1.89999	0.417884	70	1	Adam8	tissue homeostasis	0.48789
GO:0006650	1.87254	0.422394	71	1	Fabp5	glycerophospholipid metabolic process	0.490627
GO:0048762	1.87254	0.422394	71	1	Flna	mesenchymal cell differentiation	0.490627
GO:0034101	1.84586	0.426871	72	1	G6pdx	erythrocyte homeostasis	0.493298
GO:0055001	1.84586	0.426871	72	1	Actg1	muscle cell development	0.493298
GO:0008202	1.79454	0.435723	74	1	Apoe	steroid metabolic process	0.498441
GO:0009306	1.79454	0.435723	74	1	Tlr2	protein secretion	0.498441
GO:0032956	1.79454	0.435723	74	1	Myo1f	regulation of actin cytoskeleton organization	0.498441
GO:0043406	1.79454	0.435723	74	1	Adam8	positive regulation of MAP kinase activity	0.498441
GO:0006091	1.77003	0.440099	75	1	Pygl	generation of precursor metabolites and energy	0.502179
GO:0032147	1.74612	0.444442	76	1	Adam8	activation of protein kinase activity	0.50586
GO:0009991	1.72283	0.448752	77	1	Ctsd	response to extracellular stimulus	0.506944
GO:0045619	1.72283	0.448752	77	1	Adam8	regulation of lymphocyte differentiation	0.506944
GO:0050870	1.72283	0.448752	77	1	Adam8	positive regulation of T cell activation	0.506944
GO:0007067	1.70016	0.453029	78	1	Flna	mitosis	0.510502
GO:0030879	1.65652	0.461486	80	1	Cebpb	mammary gland development	0.517458
GO:0051098	1.65652	0.461486	80	1	Anxa2	regulation of binding	0.517458
GO:0006874	1.61504	0.469815	82	1	Apoe	cellular calcium ion homeostasis	0.524203
GO:0007249	1.61504	0.469815	82	1	Flna	I-kappaB kinase/NF-kappaB cascade	0.524203
GO:0006644	1.59505	0.473933	83	1	Fabp5	phospholipid metabolic process	0.526205
GO:0007126	1.59505	0.473933	83	1	Calr	meiosis	0.526205
GO:0002573	1.57555	0.478019	84	1	Adam8	myeloid leukocyte differentiation	0.526867
GO:0019221	1.57555	0.478019	84	1	Ifitm3	cytokine-mediated signaling pathway	0.526867
GO:0051259	1.57555	0.478019	84	1	Mgst1	protein oligomerization	0.526867
GO:0072657	1.55651	0.482074	85	1	Flna	protein localization to membrane	0.530047
GO:0055074	1.53792	0.486098	86	1	Apoe	calcium ion homeostasis	0.533178
GO:0010035	1.51976	0.490092	87	1	Prdx5	response to inorganic substance	0.534968
GO:0042098	1.51976	0.490092	87	1	Itgb2	T cell proliferation	0.534968
GO:0051321	1.50202	0.494056	88	1	Calr	meiotic cell cycle	0.537998
GO:0006606	1.48469	0.497989	89	1	Flna	protein import into nucleus	0.538399
GO:0006917	1.48469	0.497989	89	1	Cebpb	induction of apoptosis	0.538399
GO:0050678	1.48469	0.497989	89	1	Grn	regulation of epithelial cell proliferation	0.538399
GO:0051170	1.45118	0.505766	91	1	Flna	nuclear import	0.545505
GO:0071902	1.43497	0.509611	92	1	Adam8	positive regulation of protein serine/threonine kinase activity	0.548346
GO:0017038	1.38843	0.52097	95	1	Flna	protein import	0.557918
GO:0045926	1.38843	0.52097	95	1	Tlr2	negative regulation of growth	0.557918
GO:0048839	1.35904	0.528399	97	1	Mapkapk2	inner ear development	0.563211
GO:0060485	1.35904	0.528399	97	1	Flna	mesenchyme development	0.563211
GO:0001890	1.33082	0.535716	99	1	Cebpb	placenta development	0.567008
GO:0035264	1.33082	0.535716	99	1	G6pdx	multicellular organism growth	0.567008
GO:0048871	1.33082	0.535716	99	1	Adam8	multicellular organismal homeostasis	0.567008
GO:0031589	1.2906	0.546484	102	1	Adam8	cell-substrate adhesion	0.575714
GO:0045444	1.2906	0.546484	102	1	Cebpb	fat cell differentiation	0.575714
GO:0030324	1.26508	0.553526	104	1	Hsd11b1	lung development	0.58178
GO:0051146	1.25269	0.557007	105	1	Actg1	striated muscle cell differentiation	0.584084
GO:0009952	1.24053	0.560462	106	1	Ifitm1	anterior/posterior pattern specification	0.586349
GO:0030323	1.22861	0.56389	107	1	Hsd11b1	respiratory tube development	0.587224
GO:0051251	1.22861	0.56389	107	1	Adam8	positive regulation of lymphocyte activation	0.587224
GO:0043583	1.20542	0.570669	109	1	Mapkapk2	ear development	0.592919
GO:0006875	1.19415	0.574019	110	1	Apoe	cellular metal ion homeostasis	0.595036
GO:0010564	1.16153	0.583918	113	1	Calr	regulation of cell cycle process	0.603915
GO:0043405	1.11088	0.599919	118	1	Adam8	regulation of MAP kinase activity	0.619051
GO:0010817	1.10127	0.603047	119	1	Il1rn	regulation of hormone levels	0.620864
GO:0006873	1.09181	0.60615	120	1	Apoe	cellular ion homeostasis	0.621235
GO:0060541	1.09181	0.60615	120	1	Hsd11b1	respiratory system development	0.621235
GO:0032943	1.08251	0.60923	121	1	Itgb2	mononuclear cell proliferation	0.621579
GO:0046651	1.08251	0.60923	121	1	Itgb2	lymphocyte proliferation	0.621579
GO:0071345	1.07336	0.612286	122	1	Ifitm3	cellular response to cytokine stimulus	0.623293
GO:0030217	1.05557	0.618329	124	1	Adam8	T cell differentiation	0.626628
GO:0050863	1.05557	0.618329	124	1	Adam8	regulation of T cell activation	0.626628
GO:0043623	1.04686	0.621315	125	1	Calr	cellular protein complex assembly	0.62685
GO:0070661	1.04686	0.621315	125	1	Itgb2	leukocyte proliferation	0.62685
GO:0051493	1.03829	0.624279	126	1	Myo1f	regulation of cytoskeleton organization	0.628441
GO:0051603	1.46219	0.649803	182	2	Hsp90b1,Edem1	proteolysis involved in cellular protein catabolic process	0.652684
GO:0044257	1.41346	0.654711	188	2	Hsp90b1,Edem1	cellular protein catabolic process	0.656159
GO:0001934	1.32488	0.665378	200	2	C3,Adam8	positive regulation of protein phosphorylation	0.665378

## Sheet: 18h up hallmark
	odds.ratio	p.value	n.categoy	n.category.and.component	genes	FDR
HALLMARK_COMPLEMENT	6.22284	6.04953e-05	147	9	Mmp8,Ctsd,Pla2g7,C3,Ctsc,Plaur,Lgals3,Cebpb,Fcer1g	0.0013309
HALLMARK_KRAS_SIGNALING_UP	4.47947	0.00206454	148	7	Itgb2,Hsd11b1,Adam8,Gpnmb,F13a1,Plaur,Fcer1g	0.0227099
HALLMARK_CHOLESTEROL_HOMEOSTASIS	5.89619	0.00695458	62	4	Fabp5,Plaur,Lgals3,Actg1	0.0429958
HALLMARK_MTORC1_SIGNALING	3.44825	0.00781741	188	7	Itgb2,Calr,Hsp90b1,Edem1,Ctsc,Pgk1,Eno1	0.0429958
HALLMARK_INFLAMMATORY_RESPONSE	3.03621	0.0336442	146	5	Cybb,Ifitm1,Sell,Tlr2,Plaur	0.114044
HALLMARK_ALLOGRAFT_REJECTION	2.99199	0.0353918	148	5	Itgb2,Tlr2,Flna,Degs1,Prkcg	0.114044
HALLMARK_XENOBIOTIC_METABOLISM	2.97034	0.0362866	149	5	Apoe,Hsd11b1,Dhrs7,Pgd,Alas1	0.114044
HALLMARK_UNFOLDED_PROTEIN_RESPONSE	3.2143	0.0454705	109	4	Calr,Hsp90b1,Edem1,Cebpb	0.125044
HALLMARK_HYPOXIA	2.60926	0.0560044	168	5	Prdx5,Anxa2,Plaur,Pgk1,Eno1	0.13381
HALLMARK_GLYCOLYSIS	2.54383	0.0608228	172	5	Pgam1,Pygl,Taldo1,Pgk1,Eno1	0.13381
HALLMARK_INTERFERON_ALPHA_RESPONSE	3.07055	0.0859726	84	3	Ifitm1,Ifitm3,Sell	0.171945
HALLMARK_COAGULATION	2.85391	0.100761	90	3	Apoc2,Mmp8,C3	0.184728
HALLMARK_PI3K_AKT_MTOR_SIGNALING	2.60761	0.121957	98	3	Rps6ka1,Calr,Hsp90b1	0.206388
HALLMARK_IL6_JAK_STAT3_SIGNALING	2.32024	0.226269	72	2	Tlr2,Csf2rb	0.355565
HALLMARK_ADIPOGENESIS	1.87803	0.282988	180	4	Apoe,Dhrs7,C3,Taldo1	0.415049
HALLMARK_APICAL_SURFACE	2.58772	0.332102	32	1	Plaur	0.45664
HALLMARK_REACTIVE_OXIGEN_SPECIES_PATHWAY	1.85952	0.426466	44	1	Mgst1	0.55028
HALLMARK_IL2_STAT5_SIGNALING	1.46145	0.467193	169	3	Mapkapk2,Ifitm3,Sell	0.55028
HALLMARK_TNFA_SIGNALING_VIA_NFKB	1.42535	0.475242	173	3	Tlr2,Plaur,Cebpb	0.55028
HALLMARK_APOPTOSIS	1.15385	0.693528	140	2	Ifitm3,Lgals3	0.754283
HALLMARK_EPITHELIAL_MESENCHYMAL_TRANSITION	1.0361	0.719998	155	2	Flna,Plaur	0.754283
HALLMARK_APICAL_JUNCTION	1.00181	1	160	2	Cnn2,Actg1	1

## Sheet: 42h up GO
	odds.ratio	p.value	n.categoy	n.category.and.component	genes	description	FDR
GO:0030595	6.637	6.50025e-09	50	20	Itgb2,Ccl3,Nckap1l,Aif1,Cd74,Adam8,Ccr1,Spp1,Pf4,Coro1a,Itgam,Mpp1,Ccl12,Ccl2,Camk1d,C3ar1,Ccr2,C5ar1,Fcer1g,Fcgr3	leukocyte chemotaxis	5.67472e-06
GO:0060326	5.50556	3.14803e-08	59	21	Itgb2,Ccl3,Nckap1l,Aif1,Cd74,Adam8,Ccr1,Spp1,Pf4,Coro1a,Itgam,Mpp1,Ccl12,Ccl2,Camk1d,C3ar1,Ccr2,C5ar1,Fcer1g,Fcgr3,Rhog	cell chemotaxis	1.37412e-05
GO:0048002	9.20954	7.2627e-08	29	14	Calr,Fcgr1,Tapbp,Cd74,Slc11a1,Pycard,Ifi30,H2-DMa,Fcer1g,Fcgr3,B2m,H2-K1,H2-D1,H2-DMb1	antigen processing and presentation of peptide antigen	2.11344e-05
GO:0002687	11.8051	1.12714e-07	22	12	Ccl3,Nckap1l,Aif1,Cd74,Adam8,Ccr1,Tlr2,Pycard,Ccl2,Camk1d,C3ar1,Ccr2	positive regulation of leukocyte migration	2.45997e-05
GO:0002474	39.0412	2.19483e-07	10	8	Calr,Fcgr1,Tapbp,Ifi30,Fcer1g,Fcgr3,H2-K1,H2-D1	antigen processing and presentation of peptide antigen via MHC class I	3.83218e-05
GO:0050900	4.16876	3.67555e-07	78	23	Itgb2,Ccl3,Nckap1l,Aif1,Cd74,Rabgef1,Adam8,Ccr1,Tlr2,Spp1,Pf4,Coro1a,Itgam,Pycard,Mpp1,Ccl12,Ccl2,Camk1d,C3ar1,Ccr2,C5ar1,Fcer1g,Fcgr3	leukocyte migration	5.34793e-05
GO:0006909	4.96115	4.72049e-07	57	19	Calr,Coro1c,Fcgr1,Abr,Nckap1l,C3,Aif1,Slc11a1,Fgr,Coro1a,Pycard,Ccl2,Sirpa,Scarb1,Camk1d,Lrp1,Ccr2,Fcer1g,Fcgr3	phagocytosis	5.88712e-05
GO:0002690	17.6189	6.96275e-07	14	9	Ccl3,Nckap1l,Aif1,Cd74,Ccr1,Ccl2,Camk1d,C3ar1,Ccr2	positive regulation of leukocyte chemotaxis	7.5981e-05
GO:0050766	8.427	1.18237e-06	26	12	Calr,Fcgr1,Abr,Nckap1l,C3,Slc11a1,Pycard,Ccl2,Sirpa,Camk1d,Fcer1g,Fcgr3	positive regulation of phagocytosis	0.00011469
GO:0045055	8.99801	2.15599e-06	23	11	Ccl3,Abr,Tmed10,Myo1f,Rabgef1,Fgr,Milr1,Lyn,Ccr2,Fes,Fcer1g	regulated secretory pathway	0.00016771
GO:0060627	3.14639	2.27622e-06	117	28	Calr,Napa,Rala,Fcgr1,Pacsin2,Abr,Rab3d,Dab2,Nckap1l,C3,Rabgef1,Slc11a1,Ptpn1,Fgr,Pycard,Map2k2,Ccl2,Sirpa,Camk1d,Lyn,Ccr2,Cd14,Fes,Actn4,Fcer1g,Fcgr3,Mapk3,Mapk1	regulation of vesicle-mediated transport	0.00016771
GO:2000145	2.66427	2.32715e-06	177	37	Ccl3,Akt1,Rhoa,Abr,Elp5,Vcl,Dab2,Nckap1l,Myo1f,Aif1,Cd74,Csf1r,Rabgef1,Adam8,Ifitm1,Ccr1,Mkks,Tlr2,Lmna,Fgr,Plxnd1,Coro1a,Pycard,Mpp1,Ctsh,Trf,Map2k2,Ccl2,Plxnb2,Camk1d,Lrp1,C3ar1,Lyn,Bst2,Ccr2,Tmsb4x,Fes	regulation of cell motility	0.00016771
GO:0071621	6.73357	2.49741e-06	32	13	Itgb2,Ccl3,Nckap1l,Cd74,Spp1,Itgam,Mpp1,Ccl2,Camk1d,C3ar1,C5ar1,Fcer1g,Fcgr3	granulocyte chemotaxis	0.00016771
GO:0045807	5.48124	2.89072e-06	42	15	Calr,Fcgr1,Abr,Dab2,Nckap1l,C3,Slc11a1,Pycard,Ccl2,Sirpa,Camk1d,Cd14,Actn4,Fcer1g,Fcgr3	positive regulation of endocytosis	0.000180257
GO:0051272	3.41446	3.6225e-06	94	24	Ccl3,Elp5,Dab2,Nckap1l,Myo1f,Aif1,Cd74,Csf1r,Adam8,Ccr1,Tlr2,Fgr,Coro1a,Pycard,Ctsh,Trf,Map2k2,Ccl2,Camk1d,C3ar1,Lyn,Ccr2,Tmsb4x,Adam17	positive regulation of cellular component movement	0.000193686
GO:0051270	2.53921	3.64994e-06	194	39	Ccl3,Akt1,Rhoa,Abr,Elp5,Vcl,Dab2,Nckap1l,Myo1f,Aif1,Cd74,Csf1r,Rabgef1,Adam8,Ifitm1,Ccr1,Mkks,Tlr2,Lmna,Fgr,Plxnd1,Coro1a,Pycard,Mpp1,Ctsh,Trf,Map2k2,Ccl2,Plxnb2,Camk1d,Lrp1,C3ar1,Lyn,Bst2,Ccr2,Tmsb4x,Adam17,Fes,Actn4	regulation of cellular component movement	0.000193686
GO:0050764	6.3961	3.77166e-06	33	13	Calr,Fcgr1,Abr,Nckap1l,C3,Slc11a1,Fgr,Pycard,Ccl2,Sirpa,Camk1d,Fcer1g,Fcgr3	regulation of phagocytosis	0.000193686
GO:0006984	6.93571	4.87692e-06	29	12	Bax,Srebf1,Ero1l,Derl1,Hspa5,Ptpn1,Serp1,Lmna,Atp2a2,Aars,Ppp1r15b,Ccnd1	ER-nucleus signaling pathway	0.000219217
GO:0030593	6.93571	4.87692e-06	29	12	Itgb2,Ccl3,Nckap1l,Cd74,Spp1,Itgam,Mpp1,Camk1d,C3ar1,C5ar1,Fcer1g,Fcgr3	neutrophil chemotaxis	0.000219217
GO:0002443	3.06323	5.10476e-06	115	27	Ccl3,Ptpn6,Fcgr1,Abr,Prkcd,C3,Myo1f,Cd74,Rabgef1,Slc11a1,Ptprc,Prdx1,Fgr,Ctsc,Ctsh,H2-DMa,Milr1,Lyn,Bst2,Ccr2,Fes,Fcer1g,Pirb,Fcgr3,B2m,H2-K1,H2-D1	leukocyte mediated immunity	0.000219217
GO:2000147	3.41398	5.68583e-06	90	23	Ccl3,Elp5,Dab2,Nckap1l,Myo1f,Aif1,Cd74,Csf1r,Adam8,Ccr1,Tlr2,Fgr,Coro1a,Pycard,Ctsh,Trf,Map2k2,Ccl2,Camk1d,C3ar1,Lyn,Ccr2,Tmsb4x	positive regulation of cell motility	0.000219217
GO:0030100	4.00482	5.71268e-06	66	19	Calr,Fcgr1,Pacsin2,Abr,Dab2,Nckap1l,C3,Rabgef1,Slc11a1,Ptpn1,Fgr,Pycard,Ccl2,Sirpa,Camk1d,Cd14,Actn4,Fcer1g,Fcgr3	regulation of endocytosis	0.000219217
GO:0019882	5.51689	5.80467e-06	39	14	Calr,Fcgr1,Tapbp,Cd74,Slc11a1,Pycard,Ifi30,H2-DMa,Fcer1g,Fcgr3,B2m,H2-K1,H2-D1,H2-DMb1	antigen processing and presentation	0.000219217
GO:0040012	2.50235	6.02657e-06	191	38	Ccl3,Akt1,Rhoa,Abr,Elp5,Vcl,Dab2,Nckap1l,Myo1f,Aif1,Cd74,Csf1r,Rabgef1,Adam8,Ifitm1,Ifitm3,Ccr1,Mkks,Tlr2,Lmna,Fgr,Plxnd1,Coro1a,Pycard,Mpp1,Ctsh,Trf,Map2k2,Ccl2,Plxnb2,Camk1d,Lrp1,C3ar1,Lyn,Bst2,Ccr2,Tmsb4x,Fes	regulation of locomotion	0.000219217
GO:0006897	2.71826	6.50538e-06	150	32	Calr,Coro1c,Fcgr1,Mapkapk2,Pacsin2,Abr,Dab2,Nckap1l,App,C3,Aif1,Ehd1,Rabgef1,Slc11a1,Snx5,Ptpn1,Wasf2,Fgr,Coro1a,Pycard,Ccl2,Sirpa,Scarb1,Camk1d,Lrp1,Ccr2,Cd14,Actn4,Fcer1g,Fcgr3,Mapk3,Mapk1	endocytosis	0.000227168
GO:0006457	6.54978	7.44295e-06	30	12	Tubb5,Pfdn2,Ahsa1,Hsp90aa1,Ero1l,Tuba1b,Cd74,Aars,Sep15,H2-DMa,B2m,H2-DMb1	protein folding	0.000249911
GO:0040017	3.21915	1.24432e-05	94	23	Ccl3,Elp5,Dab2,Nckap1l,Myo1f,Aif1,Cd74,Csf1r,Adam8,Ccr1,Tlr2,Fgr,Coro1a,Pycard,Ctsh,Trf,Map2k2,Ccl2,Camk1d,C3ar1,Lyn,Ccr2,Tmsb4x	positive regulation of locomotion	0.00040233
GO:0030334	2.52359	1.78037e-05	164	33	Ccl3,Akt1,Rhoa,Abr,Elp5,Vcl,Dab2,Nckap1l,Myo1f,Aif1,Cd74,Csf1r,Rabgef1,Adam8,Ifitm1,Ccr1,Tlr2,Lmna,Fgr,Plxnd1,Coro1a,Pycard,Mpp1,Ctsh,Ccl2,Plxnb2,Camk1d,Lrp1,C3ar1,Lyn,Bst2,Ccr2,Tmsb4x	regulation of cell migration	0.000555094
GO:0000910	4.59288	2.83944e-05	44	14	Kif20a,Rhoa,Rala,Birc5,Actr2,Aurkb,Myh9,Racgap1,Incenp,Actr3,Nusap1,Plk1,Pin1,Cfl1	cytokinesis	0.00085477
GO:0009617	2.53988	2.96518e-05	153	31	Ccl3,Hnrnpa0,Fcgr1,Mapkapk2,Abr,Prkcd,Litaf,Myo1f,Slc11a1,Tlr2,Fgr,Tnfrsf1a,Trib1,Mif,Ccl2,Rara,Lyn,C5ar1,Cd14,Mapk14,Cebpb,Ptafr,Fcer1g,B2m,Gstp1,H2-K1,Mapk3,Mapk1,Lyz1,Lyz2,Sp110	response to bacterium	0.000862866
GO:0030335	3.2017	3.06608e-05	86	21	Ccl3,Elp5,Dab2,Nckap1l,Myo1f,Aif1,Cd74,Csf1r,Adam8,Ccr1,Tlr2,Fgr,Coro1a,Pycard,Ctsh,Ccl2,Camk1d,C3ar1,Lyn,Ccr2,Tmsb4x	positive regulation of cell migration	0.000863449
GO:0045576	8.0024	3.47872e-05	20	9	Lcp2,Rabgef1,Fgr,Milr1,Ptpre,Lyn,Fes,Fcer1g,Fcgr3	mast cell activation	0.000949038
GO:0019884	6.52839	4.38358e-05	25	10	Fcgr1,Tapbp,Cd74,Ifi30,H2-DMa,Fcer1g,Fcgr3,B2m,H2-K1,H2-DMb1	antigen processing and presentation of exogenous antigen	0.00115966
GO:0002699	3.42203	8.5123e-05	66	17	Fcgr1,C3,Cd74,Rabgef1,Ptprc,Tlr2,Fgr,Mif,Ccl2,Lyn,Ccr2,Fes,Fcer1g,Fcgr3,B2m,H2-K1,H2-D1	positive regulation of immune effector process	0.00218566
GO:0007059	2.99643	9.90892e-05	86	20	Ddx3x,Spag5,Cdc42,Pttg1,Top2a,Ndc80,Incenp,Nusap1,Knstrn,Smc2,Ebna1bp2,Cenpc1,Mad2l1,Smc4,Cenpe,Mcmbp,Espl1,Bub3,Spdl1,Cenpw	chromosome segregation	0.00247157
GO:0050921	6.2846	0.000130754	23	9	Ccl3,Nckap1l,Aif1,Cd74,Ccr1,Ccl2,Camk1d,C3ar1,Ccr2	positive regulation of chemotaxis	0.00317078
GO:0033003	8.53002	0.000204497	15	7	Rabgef1,Fgr,Milr1,Ptpre,Lyn,Fes,Fcer1g	regulation of mast cell activation	0.00482503
GO:0007051	3.86715	0.000212729	46	13	Tubb5,Spag5,Ranbp1,Kif11,Aurkb,Myh9,Ndc80,Tpx2,Flna,Tubb4b,Tacc3,Cltc,Espl1	spindle organization	0.00488716
GO:0000226	2.23818	0.00023462	169	31	Tubb5,Spag5,Kif20a,Ranbp1,Cdc42,Kif11,Birc5,Gabarap,Xpo1,Aurkb,Nin,Myh9,Tuba1b,Ndc80,Nusap1,Tpx2,Mapre1,Lmna,Fkbp4,Plk1,Flna,Slain2,Tubb4b,Tacc3,2810417H13Rik,Cenpe,Cltc,Fes,Npm1,Espl1,Spdl1	microtubule cytoskeleton organization	0.00525189
GO:0006986	4.89236	0.000261299	30	10	Bax,Hsp90aa1,Ero1l,Derl1,Hspa5,Ptpn1,Serp1,Aars,Stt3b,Ccnd1	response to unfolded protein	0.00570285
GO:0051493	2.45501	0.000269805	126	25	Spag5,Ranbp1,Cdc42,Rhoa,Pfn1,Xpo1,Prkcd,Nckap1l,Myo1f,Csf1r,Tpx2,Mapre1,Fgr,Mtpn,Fkbp4,Coro1a,Pycard,Slain2,Lrp1,Bst2,Fes,Cfl1,Npm1,Mapk3,Mapk1	regulation of cytoskeleton organization	0.00574487
GO:0006954	2.22801	0.000322323	164	30	Ccl3,Akt1,Il17ra,Apoe,Cd44,Hnrnpa0,Fcgr1,Mapkapk2,Abr,Pla2g7,C3,Aif1,Rabgef1,Adam8,Ccr1,Slc11a1,Tnfrsf1b,Tnfrsf1a,Psma1,Pycard,Nt5e,Ccl12,Thbs1,Lyn,Ccr2,Ptafr,Fcer1g,Fcgr3,Alox5ap,Fabp4	inflammatory response	0.00669972
GO:0070371	3.43819	0.000331266	54	14	Ccl3,Dusp3,Ptpn6,Dusp6,Igf1,Cd74,Csf1r,Pycard,Ctsh,Trf,Mif,Lyn,Gpr183,Gstp1	ERK1 and ERK2 cascade	0.00672548
GO:0071622	9.73308	0.000377393	12	6	Nckap1l,Cd74,Mpp1,Ccl2,Camk1d,C3ar1	regulation of granulocyte chemotaxis	0.00736847
GO:0048520	5.17305	0.000386519	26	9	Ccl3,Nckap1l,Aif1,Cd74,Ccr1,Ccl2,Camk1d,C3ar1,Ccr2	positive regulation of behavior	0.00736847
GO:0030968	6.00484	0.000388258	21	8	Bax,Ero1l,Derl1,Hspa5,Ptpn1,Serp1,Aars,Ccnd1	endoplasmic reticulum unfolded protein response	0.00736847
GO:0010564	2.53017	0.000430071	113	23	Ddx3x,Foxm1,Dbf4,Calr,Ranbp1,Cdc20,Cdc42,Birc5,Cdk1,Fzr1,Xpo1,Id2,Aif1,Nusap1,Tpx2,Mad2l1,Plk1,Brd7,Pin1,Tipin,Npm1,Trp53,Ccnd1	regulation of cell cycle process	0.00782191
GO:0045087	2.53017	0.000430071	113	23	Ddx3x,Ptpn6,Mapkapk2,Clec4n,Myo1f,Aif1,Cd74,Adam8,Ifitm1,Ifitm3,Ccr1,Slc11a1,Lcn2,Tlr2,Prdx1,Fgr,Clec5a,Pycard,Tlr13,Ccl2,Lyn,Bst2,Arrb2	innate immune response	0.00782191
GO:0043623	2.35209	0.000542725	125	24	Ube2c,Calr,Napa,Pfn1,Aurkb,Nin,Vdac2,Prkcd,Dab2,Nckap1l,Aif1,Diap1,Mbd2,Mkks,Mapre1,Cenpc1,Mtpn,Fkbp4,Coro1a,Pycard,Slain2,Fes,Sdhaf1,Cenpw	cellular protein complex assembly	0.00966936
GO:0034620	5.57502	0.000560559	22	8	Bax,Ero1l,Derl1,Hspa5,Ptpn1,Serp1,Aars,Ccnd1	cellular response to unfolded protein	0.00968207
GO:0051050	2.06758	0.000565619	192	33	Ccl3,Akt1,Calr,Bax,Fcgr1,Abr,Igf1,Glud1,Dab2,Nckap1l,Clec4n,Abcg1,C3,Slc11a1,Serp1,Tlr2,Fgr,Clec5a,Clec4e,Pycard,Flna,Mif,Ccl2,Sirpa,Camk1d,Lrp1,AF251705,Sfn,Cd14,Mapk14,Actn4,Fcer1g,Fcgr3	positive regulation of transport	0.00968207
GO:0050707	4.25224	0.000621348	33	10	Ccl3,Clec4n,Rabgef1,Tlr2,Fgr,Clec5a,Clec4e,Pycard,Lyn,AF251705	regulation of cytokine secretion	0.0102347
GO:0050920	4.25224	0.000621348	33	10	Ccl3,Nckap1l,Aif1,Cd74,Ccr1,Mpp1,Ccl2,Camk1d,C3ar1,Ccr2	regulation of chemotaxis	0.0102347
GO:0043303	8.34166	0.000645583	13	6	Rabgef1,Fgr,Milr1,Lyn,Fes,Fcer1g	mast cell degranulation	0.0102472
GO:0072676	8.34166	0.000645583	13	6	Ccl3,Aif1,Adam8,Pycard,Ccl2,Ccr2	lymphocyte migration	0.0102472
GO:0034976	3.56318	0.000664534	45	12	Bax,Ero1l,Derl1,Fam129a,Hspa5,Ptpn1,Serp1,Aars,Atf4,Ppp1r15b,Cebpb,Ccnd1	response to endoplasmic reticulum stress	0.0103596
GO:0019915	4.62704	0.000720049	28	9	B4galnt1,Abcg1,C3,Ehd1,Msr1,Hexa,Plin2,Abhd5,Scarb1	lipid storage	0.0110281
GO:0002237	2.46838	0.000965809	105	21	Ccl3,Hnrnpa0,Mapkapk2,Abr,Litaf,Slc11a1,Tlr2,Trib1,Mif,Ccl2,Rara,Lyn,C5ar1,Cd14,Mapk14,Cebpb,Ptafr,B2m,Gstp1,Mapk3,Mapk1	response to molecule of bacterial origin	0.0145371
GO:0070372	3.35832	0.00101417	47	12	Ccl3,Dusp3,Ptpn6,Dusp6,Igf1,Cd74,Csf1r,Pycard,Mif,Lyn,Gpr183,Gstp1	regulation of ERK1 and ERK2 cascade	0.0150062
GO:0006911	7.29657	0.00104081	14	6	Fcgr1,Nckap1l,Aif1,Sirpa,Fcer1g,Fcgr3	phagocytosis, engulfment	0.0151438
GO:0001776	3.10837	0.00114848	54	13	Akt1,Bax,Nckap1l,Cd74,Anxa1,Coro1a,Ccnb2,Mif,Ccl2,Lyn,Adam17,Fcer1g,Pirb	leukocyte homeostasis	0.0164365
GO:0002675	9.71639	0.00121383	10	5	Fcgr1,C3,Adam8,Fcer1g,Fcgr3	positive regulation of acute inflammatory response	0.0168202
GO:2000401	9.71639	0.00121383	10	5	Ccl3,Aif1,Adam8,Pycard,Ccr2	regulation of lymphocyte migration	0.0168202
GO:0001909	3.75914	0.00131799	36	10	Ptpn6,Fcgr1,Ptprc,Prdx1,Ctsc,Ctsh,Fcgr3,B2m,H2-K1,H2-D1	leukocyte mediated cytotoxicity	0.0177016
GO:0002821	3.75914	0.00131799	36	10	Fcgr1,C3,Slc11a1,Ptprc,Ccr2,Fcer1g,Fcgr3,B2m,H2-K1,H2-D1	positive regulation of adaptive immune response	0.0177016
GO:0034097	2.12698	0.00137624	147	26	Klf6,Ptpn6,Bcl2l1,Aif1,Cd74,Csf1r,Rabgef1,Ifitm1,Ifitm3,Slc11a1,Ptprc,Mkks,Il6ra,Jak1,Tnfrsf1b,Pf4,Tnfrsf1a,Coro1a,Fkbp1a,Ccl2,Rbmxl1,Mcl1,Pid1,Bst2,Ccr2,Pirb	response to cytokine stimulus	0.0182039
GO:0050715	4.5898	0.00147144	25	8	Ccl3,Clec4n,Tlr2,Fgr,Clec5a,Clec4e,Pycard,AF251705	positive regulation of cytokine secretion	0.0191727
GO:0010324	6.48609	0.00159836	15	6	Fcgr1,Nckap1l,Aif1,Sirpa,Fcer1g,Fcgr3	membrane invagination	0.0197288
GO:0050663	3.36254	0.00160556	43	11	Ccl3,Lcp2,Clec4n,Rabgef1,Tlr2,Fgr,Clec5a,Clec4e,Pycard,Lyn,AF251705	cytokine secretion	0.0197288
GO:0043487	5.24537	0.00162248	20	7	Hnrnpd,Hnrnpa0,Mapkapk2,Slc11a1,Tnfrsf1b,Ybx1,Apobec1	regulation of RNA stability	0.0197288
GO:0050853	5.24537	0.00162248	20	7	Ptpn6,Nckap1l,Ptprc,Lat2,Lyn,Nfam1,Mapk1	B cell receptor signaling pathway	0.0197288
GO:0050729	3.9934	0.00162712	31	9	Ccl3,Fcgr1,C3,Adam8,Tnfrsf1a,Ccr2,Fcer1g,Fcgr3,Fabp4	positive regulation of inflammatory response	0.0197288
GO:0001101	2.71103	0.00177717	74	16	Cdh1,Klf4,Bax,Dnmt1,Bcl2l1,Lgmn,Aars,Anxa2,Ctsh,Rara,S100a10,Pid1,Cfl1,Cebpb,Gstp1,Rraga	response to acid	0.021253
GO:0090068	3.26004	0.00196349	44	11	Ddx3x,Dbf4,Ranbp1,Birc5,Id2,Aif1,Nusap1,Mad2l1,Plk1,Npm1,Trp53	positive regulation of cell cycle process	0.0231639
GO:0034502	8.09616	0.00205461	11	5	Aurkb,Rad21,Plk1,Bub1b,Spdl1	protein localization to chromosome	0.023601
GO:0043304	8.09616	0.00205461	11	5	Rabgef1,Fgr,Lyn,Fes,Fcer1g	regulation of mast cell degranulation	0.023601
GO:0010883	5.83672	0.00235677	16	6	Abcg1,C3,Ehd1,Msr1,Abhd5,Scarb1	regulation of lipid storage	0.0267203
GO:0007067	2.53418	0.00247003	78	16	Ube2c,Spag5,Ranbp1,Cdc42,Kif11,Birc5,Aurkb,Nusap1,Mad2l1,Plk1,Flna,Bub1b,Cltc,Espl1,Bub3,Spdl1	mitosis	0.0273145
GO:0002366	2.42088	0.00247176	86	17	Ccl3,Abr,Myo1f,Rabgef1,Slc11a1,Ptprc,Fgr,Tyrobp,Pycard,Milr1,Lyn,Ccr2,Gpr183,Fes,Fcer1g,Trp53,Lgals1	leukocyte activation involved in immune response	0.0273145
GO:0050778	2.04056	0.00264346	152	26	Dusp3,Ptpn6,Fcgr1,Mapkapk2,Nckap1l,C3,Cd74,Rabgef1,Adam8,Slc11a1,Ptprc,Tlr2,Pycard,Tlr13,H2-DMa,Lat2,Lyn,Ccr2,Nfam1,Fcer1g,Fcgr3,Arrb2,B2m,H2-K1,Mapk1,H2-D1	positive regulation of immune response	0.0288468
GO:0045123	6.9381	0.00325262	12	5	Itgb2,Adam8,Itgam,Ccl2,Ccr2	cellular extravasation	0.035056
GO:0002495	5.30537	0.00335714	17	6	Cd74,Pycard,Ifi30,H2-DMa,Fcer1g,H2-DMb1	antigen processing and presentation of peptide antigen via MHC class II	0.0357413
GO:0007346	2.26787	0.00394493	96	18	Ddx3x,Dbf4,Dusp3,Ranbp1,Cdc42,Birc5,Cdk1,App,Cdkn1a,Aif1,Nusap1,Tpx2,Mad2l1,Plk1,Brd7,Tipin,Trp53,Ccnd1	regulation of mitotic cell cycle	0.0414931
GO:0031663	4.26005	0.00400021	23	7	Ccl3,Mif,Lyn,Mapk14,Ptafr,Mapk3,Mapk1	lipopolysaccharide-mediated signaling pathway	0.0415737
GO:0000398	2.90536	0.0040971	48	11	Srsf1,Sf3a2,Srsf7,Eif4a3,Mbnl1,Srrm1,Srsf9,Rbmxl1,Npm1,Phf5a,Snrnp70	mRNA splicing, via spliceosome	0.0420796
GO:0071219	2.72939	0.00425084	55	12	Ccl3,Litaf,Tlr2,Mif,Ccl2,Rara,Lyn,Mapk14,Ptafr,Gstp1,Mapk3,Mapk1	cellular response to molecule of bacterial origin	0.0431509
GO:0051258	2.58846	0.0044793	67	14	Ube2c,Pfn1,Nin,Vdac2,Prkcd,Nckap1l,Aif1,Diap1,Mapre1,Mtpn,Coro1a,Pycard,Slain2,Fes	protein polymerization	0.0440512
GO:0051321	2.35163	0.00456311	88	17	Calr,Cdc20,Ubc,Ehmt2,Actr2,Fzr1,Pttg1,Top2a,Myh9,Psmd13,Actr3,Cdc25b,Smc2,Mki67,Smc4,Espl1,Cks2	meiotic cell cycle	0.0440512
GO:0002764	2.21029	0.00463522	98	18	Dusp3,Ptpn6,Fcgr1,Mapkapk2,Nckap1l,Rabgef1,Adam8,Ptprc,Tlr2,Ctsh,Tlr13,Lat2,Lyn,Nfam1,Fcer1g,Fcgr3,Arrb2,Mapk1	immune response-regulating signaling pathway	0.0440512
GO:0043254	2.41067	0.00463532	76	15	Ddx3x,Bax,Napa,Rhoa,Pfn1,Plek,Vdac2,Prkcd,Nckap1l,Mapre1,Mtpn,Coro1a,Pycard,Slain2,Fes	regulation of protein complex assembly	0.0440512
GO:0007052	4.86254	0.00464229	18	6	Kif11,Aurkb,Ndc80,Tpx2,Flna,Cltc	mitotic spindle organization	0.0440512
GO:0031333	4.86254	0.00464229	18	6	Ddx3x,Pfn1,Vdac2,Prkcd,Mapre1,Mtpn	negative regulation of protein complex assembly	0.0440512
GO:0032272	6.07146	0.00488201	13	5	Pfn1,Vdac2,Prkcd,Mapre1,Mtpn	negative regulation of protein polymerization	0.0448631
GO:0045022	6.07146	0.00488201	13	5	Flna,Map2k2,Mapk3,Mapk1,Rab7	early endosome to late endosome transport	0.0448631
GO:0070373	6.07146	0.00488201	13	5	Dusp3,Dusp6,Igf1,Lyn,Gstp1	negative regulation of ERK1 and ERK2 cascade	0.0448631
GO:0042742	2.66687	0.00496167	56	12	Fcgr1,Prkcd,Myo1f,Slc11a1,Tlr2,Fgr,Tnfrsf1a,C5ar1,Fcer1g,H2-K1,Lyz1,Lyz2	defense response to bacterium	0.0451202
GO:0032496	2.25518	0.00546735	91	17	Ccl3,Hnrnpa0,Mapkapk2,Abr,Litaf,Slc11a1,Trib1,Mif,Ccl2,Rara,Lyn,Mapk14,Cebpb,Ptafr,Gstp1,Mapk3,Mapk1	response to lipopolysaccharide	0.0487041
GO:0050727	2.25518	0.00546735	91	17	Ccl3,Il17ra,Apoe,Fcgr1,Abr,C3,Rabgef1,Adam8,Tnfrsf1b,Tnfrsf1a,Psma1,Nt5e,Lyn,Ccr2,Fcer1g,Fcgr3,Fabp4	regulation of inflammatory response	0.0487041
GO:0000375	2.75539	0.0057029	50	11	Srsf1,Sf3a2,Srsf7,Eif4a3,Mbnl1,Srrm1,Srsf9,Rbmxl1,Npm1,Phf5a,Snrnp70	RNA splicing, via transesterification reactions	0.0497863
GO:0071222	2.75539	0.0057029	50	11	Ccl3,Litaf,Mif,Ccl2,Rara,Lyn,Mapk14,Ptafr,Gstp1,Mapk3,Mapk1	cellular response to lipopolysaccharide	0.0497863
GO:0032880	1.88683	0.00583809	162	26	Cdh1,Ccl3,Akt1,Spag5,Cdc42,Xpo1,Litaf,Cdkn1a,Clec4n,Arhgdia,Rabgef1,Rab14,Tlr2,Prdx1,Fgr,Clec5a,Clec4e,Pycard,Flna,Tacc3,Lyn,Arf6,AF251705,Sfn,Mapk14,Rhog	regulation of protein localization	0.0504619
GO:0001913	4.48791	0.00625587	19	6	Ptprc,Ctsc,Ctsh,B2m,H2-K1,H2-D1	T cell mediated cytotoxicity	0.0530231
GO:0043488	4.48791	0.00625587	19	6	Hnrnpd,Hnrnpa0,Mapkapk2,Slc11a1,Ybx1,Apobec1	regulation of mRNA stability	0.0530231
GO:0002768	2.59679	0.00641091	62	13	Dusp3,Ptpn6,Fcgr1,Nckap1l,Rabgef1,Ptprc,Tlr2,Lat2,Lyn,Nfam1,Fcer1g,Fcgr3,Mapk1	immune response-regulating cell surface receptor signaling pathway	0.0533022
GO:0032886	2.59679	0.00641091	62	13	Spag5,Ranbp1,Cdc42,Xpo1,Diap1,Mkks,Tpx2,Mapre1,Fkbp4,Slain2,Tacc3,Fes,Npm1	regulation of microtubule-based process	0.0533022
GO:0001817	1.82611	0.00667404	186	29	Ccl3,Il17ra,Mapkapk2,Nckap1l,Litaf,Clec4n,Cd74,Rabgef1,Adam8,Hspd1,Slc11a1,Tlr2,Fgr,Clec5a,Clec4e,Iqgap1,Pycard,Mif,Ccl2,C3ar1,Lyn,AF251705,Bst2,Ccr2,Cebpb,Fcer1g,Fcgr3,Arrb2,Gstp1	regulation of cytokine production	0.0549664
GO:0002902	5.39536	0.00701602	14	5	Bax,Aurkb,Cd74,Mif,Lyn	regulation of B cell apoptotic process	0.0567128
GO:0019886	5.39536	0.00701602	14	5	Cd74,Ifi30,H2-DMa,Fcer1g,H2-DMb1	antigen processing and presentation of exogenous peptide antigen via MHC class II	0.0567128
GO:0006887	2.13773	0.00749661	95	17	Ccl3,Stxbp2,Napa,Rala,Abr,Rab3d,Plek,Tmed10,Myo1f,Rabgef1,Fgr,Myo5a,Milr1,Lyn,Ccr2,Fes,Fcer1g	exocytosis	0.0600417
GO:0050795	2.78797	0.00765869	45	10	Ccl3,Nckap1l,Aif1,Cd74,Ccr1,Mpp1,Ccl2,Camk1d,C3ar1,Ccr2	regulation of behavior	0.0607821
GO:0043200	3.24701	0.00795248	32	8	Cdh1,Dnmt1,Bcl2l1,Aars,Cfl1,Cebpb,Gstp1,Rraga	response to amino acid stimulus	0.0619868
GO:0050714	3.24701	0.00795248	32	8	Ccl3,Clec4n,Tlr2,Fgr,Clec5a,Clec4e,Pycard,AF251705	positive regulation of protein secretion	0.0619868
GO:2000045	4.16687	0.00824161	20	6	Ddx3x,Dbf4,Aif1,Brd7,Trp53,Ccnd1	regulation of G1/S transition of mitotic cell cycle	0.0636719
GO:0032956	2.28338	0.00870568	74	14	Rhoa,Pfn1,Prkcd,Nckap1l,Myo1f,Csf1r,Fgr,Mtpn,Coro1a,Pycard,Lrp1,Bst2,Fes,Cfl1	regulation of actin cytoskeleton organization	0.0666672
GO:0007015	2.07826	0.00929218	103	18	Cdc42,Rhoa,Eps8,Pfn1,Hsp90b1,Prkcd,Lcp1,Nckap1l,Aif1,Diap1,Coro1a,Pycard,Flna,Trf,Sirpa,Ezr,Actn4,Cfl1	actin filament organization	0.0705398
GO:0002460	2.0537	0.00982784	104	18	Ptpn6,Fcgr1,Prkcd,C3,Cd74,Slc11a1,Ptprc,Ctsc,Ctsh,H2-DMa,Ccr2,Adam17,Fcer1g,Pirb,Fcgr3,B2m,H2-K1,H2-D1	adaptive immune response based on somatic recombination of immune receptors built from immunoglobulin superfamily domains	0.0724925
GO:0002438	6.46518	0.0102137	10	4	Fcgr1,C3,Fcer1g,Fcgr3	acute inflammatory response to antigenic stimulus	0.0724925
GO:0006910	6.46518	0.0102137	10	4	Fcgr1,Sirpa,Scarb1,Fcgr3	phagocytosis, recognition	0.0724925
GO:0030866	6.46518	0.0102137	10	4	Calr,Coro1c,Nckap1l,Tln1	cortical actin cytoskeleton organization	0.0724925
GO:0032722	6.46518	0.0102137	10	4	Cd74,Tlr2,Pycard,Mif	positive regulation of chemokine production	0.0724925
GO:0042119	6.46518	0.0102137	10	4	Abr,Myo1f,Tyrobp,Fcer1g	neutrophil activation	0.0724925
GO:0051084	6.46518	0.0102137	10	4	Cd74,Sep15,H2-DMa,H2-DMb1	'de novo' posttranslational protein folding	0.0724925
GO:0051443	6.46518	0.0102137	10	4	Cdc20,Fzr1,Plk1,Trib1	positive regulation of ubiquitin-protein ligase activity	0.0724925
GO:0016197	2.49522	0.0105451	59	12	Snx6,Cdc42,Ehd1,Rab14,Snx27,Chmp5,Flna,Map2k2,Arl4c,Mapk3,Mapk1,Rab7	endosomal transport	0.0725847
GO:0001782	3.88776	0.0106424	21	6	Bax,Nckap1l,Cd74,Mif,Lyn,Pirb	B cell homeostasis	0.0725847
GO:0002367	3.88776	0.0106424	21	6	Cd74,Slc11a1,Tlr2,Mif,Bst2,Fcer1g	cytokine production involved in immune response	0.0725847
GO:0033598	3.88776	0.0106424	21	6	Bax,Phb2,Id2,Cebpb,Mapk1,Ccnd1	mammary gland epithelial cell proliferation	0.0725847
GO:0033619	3.88776	0.0106424	21	6	Myh9,Adam8,Adam9,Ctsh,Rbmxl1,Adam17	membrane protein proteolysis	0.0725847
GO:0010608	1.81695	0.0113261	154	24	Hnrnpd,Ddx3x,Calr,Cdc42,Hnrnpa0,Mapkapk2,App,Slc11a1,Fam129a,Caprin1,Patl2,Serp1,Aco1,Tnfrsf1b,Ybx1,Pycard,Flna,Ifi30,Aars,Ctsh,Rara,Apobec1,Ppp1r15b,Pcbp1	posttranscriptional regulation of gene expression	0.0766486
GO:0071345	1.92544	0.0115454	122	20	Klf6,Ptpn6,Aif1,Cd74,Csf1r,Rabgef1,Ifitm3,Ptprc,Mkks,Il6ra,Jak1,Tnfrsf1b,Pf4,Tnfrsf1a,Fkbp1a,Ccl2,Rbmxl1,Pid1,Ccr2,Pirb	cellular response to cytokine stimulus	0.0775316
GO:0000075	2.26913	0.011915	69	13	Zak,Cdt1,Mapkapk2,Birc5,Cdk1,Fzr1,Mad2l1,Plk1,Tipin,Mapk14,Trp53,Bub3,Ccnd1	cell cycle checkpoint	0.0792737
GO:0006397	2.15947	0.0120769	83	15	Srsf1,Sf3a2,Pabpn1,App,Srsf7,Eif4a3,Mbnl1,Srrm1,Srsf9,Rbmxl1,Pcbp1,Npm1,Phf5a,Snrnp70,Gm20521	mRNA processing	0.0792737
GO:0017157	2.56644	0.012168	48	10	Napa,Rala,Abr,Rab3d,Rabgef1,Fgr,Lyn,Ccr2,Fes,Fcer1g	regulation of exocytosis	0.0792737
GO:0070507	2.56644	0.012168	48	10	Spag5,Ranbp1,Cdc42,Xpo1,Tpx2,Mapre1,Fkbp4,Slain2,Fes,Npm1	regulation of microtubule cytoskeleton organization	0.0792737
GO:0019221	2.12776	0.012963	84	15	Klf6,Ptpn6,Cd74,Rabgef1,Ifitm3,Ptprc,Mkks,Il6ra,Jak1,Tnfrsf1b,Pf4,Tnfrsf1a,Fkbp1a,Ccr2,Pirb	cytokine-mediated signaling pathway	0.0821121
GO:0033032	4.41327	0.013074	16	5	Anxa1,Mif,Adam17,Fcer1g,Ccr5	regulation of myeloid cell apoptotic process	0.0821121
GO:0033344	4.41327	0.013074	16	5	Apoe,Npc2,Abcg1,Scarb1,Lrp1	cholesterol efflux	0.0821121
GO:0097006	4.41327	0.013074	16	5	Apoe,Abcg1,Ehd1,Msr1,Scarb1	regulation of plasma lipoprotein particle levels	0.0821121
GO:2000108	4.41327	0.013074	16	5	Bax,Anxa1,Adam8,Lyn,Trp53	positive regulation of leukocyte apoptotic process	0.0821121
GO:0045646	3.64445	0.0134997	22	6	Id2,Nckap1l,Lmo2,Lyn,Klf13,Mapk14	regulation of erythrocyte differentiation	0.083583
GO:0048024	3.64445	0.0134997	22	6	Srsf7,Eif4a3,Mbnl1,Srsf9,Rbmxl1,Npm1	regulation of mRNA splicing, via spliceosome	0.083583
GO:0010954	2.88459	0.0138598	35	8	Akt1,Plgrkt,C3,Adam8,Plk1,Adam9,Trib1,Aurkaip1	positive regulation of protein processing	0.0846128
GO:0043484	2.88459	0.0138598	35	8	Srsf7,Eif4a3,Mbnl1,Srsf9,Rbmxl1,Hnrnpf,Npm1,Snrnp70	regulation of RNA splicing	0.0846128
GO:0002260	2.65724	0.014191	42	9	Akt1,Bax,Nckap1l,Cd74,Coro1a,Ccnb2,Mif,Lyn,Pirb	lymphocyte homeostasis	0.0860331
GO:0090207	5.54136	0.0148761	11	4	Srebf1,C3,Abhd5,Scarb1	regulation of triglyceride metabolic process	0.0895641
GO:0006869	2.49719	0.015094	54	11	Apoe,Npc2,Lrp10,Abcg1,Anxa1,Msr1,Plin2,Mif,Abca7,Scarb1,Lrp1	lipid transport	0.090254
GO:0007229	3.42949	0.0168524	23	6	Itgb2,Rhoa,Dab2,Fgr,Tyrobp,Fcer1g	integrin-mediated signaling pathway	0.0996538
GO:0001783	4.04513	0.0171226	17	5	Bax,Aurkb,Cd74,Mif,Lyn	B cell apoptotic process	0.0996538
GO:0006509	4.04513	0.0171226	17	5	Myh9,Adam8,Adam9,Rbmxl1,Adam17	membrane protein ectodomain proteolysis	0.0996538
GO:0033028	4.04513	0.0171226	17	5	Anxa1,Mif,Adam17,Fcer1g,Ccr5	myeloid cell apoptotic process	0.0996538
GO:0070201	1.86915	0.0184764	125	20	Ccl3,Xpo1,Litaf,Cdkn1a,Clec4n,Rabgef1,Tlr2,Prdx1,Fgr,Clec5a,Clec4e,Pycard,Flna,Tacc3,Lyn,Arf6,AF251705,Sfn,Mapk14,Rhog	regulation of establishment of protein localization	0.10682
GO:0030225	4.84781	0.0206878	12	4	Spi1,Id2,Casp8,Itgam	macrophage differentiation	0.114578
GO:0030261	4.84781	0.0206878	12	4	Top2a,Nusap1,Smc2,Smc4	chromosome condensation	0.114578
GO:0030865	4.84781	0.0206878	12	4	Calr,Coro1c,Nckap1l,Tln1	cortical cytoskeleton organization	0.114578
GO:0051351	4.84781	0.0206878	12	4	Cdc20,Fzr1,Plk1,Trib1	positive regulation of ligase activity	0.114578
GO:0007568	2.28292	0.0207004	58	11	Calr,Fzr1,Id2,Ctsl,Serp1,Lmna,Mif,Npm1,Trp53,Romo1,Ifi27l2a	aging	0.114578
GO:0006749	3.2384	0.0207369	24	6	Mgst1,Idh1,G6pdx,Gsr,Alox5ap,Gstp1	glutathione metabolic process	0.114578
GO:0030433	3.2384	0.0207369	24	6	Hsp90b1,Derl1,Vcp,Edem1,Stt3b,Man1b1	ER-associated protein catabolic process	0.114578
GO:0051223	1.87585	0.0209316	112	18	Ccl3,Xpo1,Litaf,Cdkn1a,Clec4n,Rabgef1,Tlr2,Prdx1,Fgr,Clec5a,Clec4e,Pycard,Flna,Tacc3,Lyn,AF251705,Sfn,Mapk14	regulation of protein transport	0.114891
GO:0008380	2.19012	0.0210568	71	13	Srsf1,Sf3a2,Srsf7,Eif4a3,Mbnl1,Srrm1,Srsf9,Wbp11,Rbmxl1,Hnrnpf,Npm1,Phf5a,Snrnp70	RNA splicing	0.114891
GO:0019724	2.50016	0.0218178	49	10	Ptpn6,Fcgr1,Prkcd,C3,Cd74,Ptprc,H2-DMa,Fcer1g,Pirb,Fcgr3	B cell mediated immunity	0.117803
GO:0051653	3.73281	0.0219228	18	5	Actr2,Myh9,Actr3,Nusap1,Spdl1	spindle localization	0.117803
GO:0002250	1.85576	0.0219953	113	18	Ptpn6,Fcgr1,Prkcd,C3,Cd74,Slc11a1,Ptprc,Ctsc,Ctsh,H2-DMa,Ccr2,Adam17,Fcer1g,Pirb,Fcgr3,B2m,H2-K1,H2-D1	adaptive immune response	0.117803
GO:0008203	2.59475	0.0224576	38	8	Apoe,Srebf1,App,Abcg1,Acadl,Soat1,Scarb1,Lrp1	cholesterol metabolic process	0.118821
GO:0032675	2.59475	0.0224576	38	8	Mapkapk2,Nckap1l,Rabgef1,Tlr2,Pycard,Cebpb,Fcer1g,Arrb2	regulation of interleukin-6 production	0.118821
GO:0051222	2.23492	0.0226577	59	11	Ccl3,Clec4n,Tlr2,Fgr,Clec5a,Clec4e,Pycard,Flna,AF251705,Sfn,Mapk14	positive regulation of protein transport	0.119158
GO:0050708	2.43721	0.0231666	50	10	Ccl3,Clec4n,Rabgef1,Tlr2,Fgr,Clec5a,Clec4e,Pycard,Lyn,AF251705	regulation of protein secretion	0.121097
GO:0009615	2.11623	0.0233039	73	13	Ddx3x,Bcl2l1,Ifitm1,Ifitm3,Ptprc,Lcn2,Irf5,Pycard,Tlr13,Bst2,Pcbp2,Siva1,Ifi27l2a	response to virus	0.121097
GO:0002262	2.00963	0.0244151	88	15	Spi1,Bax,Id2,Nckap1l,Anxa1,Prdx1,G6pdx,Lmo2,Ccl2,Lyn,Klf13,Adam17,Mapk14,Fcer1g,Maea	myeloid cell homeostasis	0.12612
GO:0008360	2.37718	0.0248062	51	10	Ccl3,Myh9,Myl12a,Diap1,Csf1r,Fgr,Coro1a,Plxnb2,Cdc42se1,Fes	regulation of cell shape	0.126363
GO:0002253	1.91328	0.0251687	104	17	Dusp3,Ptpn6,Mapkapk2,Nckap1l,C3,Rabgef1,Adam8,Ptprc,Tlr2,Pycard,Tlr13,Lat2,Lyn,Nfam1,Fcer1g,Arrb2,Mapk1	activation of immune response	0.126363
GO:0015918	3.06769	0.0251857	25	6	Apoe,Npc2,Abcg1,Msr1,Scarb1,Lrp1	sterol transport	0.126363
GO:0030301	3.06769	0.0251857	25	6	Apoe,Npc2,Abcg1,Msr1,Scarb1,Lrp1	cholesterol transport	0.126363
GO:0051225	3.06769	0.0251857	25	6	Tubb5,Kif11,Aurkb,Flna,Tubb4b,Cltc	spindle assembly	0.126363
GO:0032680	2.51058	0.0260127	39	8	Ccl3,Mapkapk2,Tlr2,Ccr2,Fcer1g,Fcgr3,Arrb2,Gstp1	regulation of tumor necrosis factor production	0.129222
GO:0002456	2.72188	0.0262315	32	7	Slc11a1,Ptprc,Ctsc,Ctsh,B2m,H2-K1,H2-D1	T cell mediated immunity	0.129222
GO:0051017	2.72188	0.0262315	32	7	Cdc42,Rhoa,Eps8,Lcp1,Aif1,Ezr,Actn4	actin filament bundle assembly	0.129222
GO:0007163	2.04718	0.0263476	75	13	Cdc42,Lims1,Igf1,Actr2,Myh9,Nckap1l,Actr3,Lmna,Arf6,Ezr,Rap1b,Cfl1,Spdl1	establishment or maintenance of cell polarity	0.129222
GO:0030193	3.46571	0.0275181	19	5	Plek,Prkcd,Anxa2,Lyn,Fcer1g	regulation of blood coagulation	0.132929
GO:0045132	3.46571	0.0275181	19	5	Pttg1,Top2a,Smc2,Smc4,Espl1	meiotic chromosome segregation	0.132929
GO:0001916	4.30878	0.0277126	13	4	Ptprc,B2m,H2-K1,H2-D1	positive regulation of T cell mediated cytotoxicity	0.132929
GO:0010543	4.30878	0.0277126	13	4	Plek,Prkcd,Lyn,Fcer1g	regulation of platelet activation	0.132929
GO:0070661	1.75526	0.0298865	125	19	Itgb2,Bax,Ptpn6,Prkcd,Nckap1l,Cdkn1a,Aif1,Hprt,Slc11a1,Ptprc,Coro1a,Itgam,Pycard,Fkbp1a,Lyn,Ccr2,Gpr183,Trp53,Gstp1	leukocyte proliferation	0.142573
GO:0050870	1.98245	0.0302186	77	13	Hsp90aa1,Nckap1l,Aif1,Cd74,Adam8,Hspd1,Ptprc,Coro1a,Pycard,Ccl2,H2-DMa,Ccr2,Lgals1	positive regulation of T cell activation	0.143374
GO:0045834	2.61673	0.0306938	33	7	Apoe,Cdc42,Srebf1,Abcg1,Abhd5,Scarb1,Lyn	positive regulation of lipid metabolic process	0.144842
GO:0032970	2.01165	0.0327778	82	14	Rhoa,Pfn1,Prkcd,Nckap1l,Myo1f,Csf1r,Fgr,Mtpn,Coro1a,Pycard,Lrp1,Bst2,Fes,Cfl1	regulation of actin filament-based process	0.153844
GO:0006518	2.43445	0.0335075	45	9	Mgst1,Tapbp,Idh1,Tpp1,G6pdx,Gsr,Ctsh,Alox5ap,Gstp1	peptide metabolic process	0.155962
GO:0007126	1.98212	0.0337755	83	14	Calr,Cdc20,Ubc,Ehmt2,Fzr1,Pttg1,Top2a,Psmd13,Cdc25b,Smc2,Mki67,Smc4,Espl1,Cks2	meiosis	0.155962
GO:0043525	3.23412	0.0339436	20	5	Ccl3,Bax,Bag1,Atf4,Trp53	positive regulation of neuron apoptotic process	0.155962
GO:0045577	3.23412	0.0339436	20	5	Ptpn6,Id2,Nckap1l,Ptprc,Nfam1	regulation of B cell differentiation	0.155962
GO:0002573	1.95344	0.0349976	84	14	Ccl3,Spi1,Id2,Myh9,Csf1r,Adam8,Casp8,Itgam,Trf,Rara,Lyn,Cd300lf,Mapk14,Pirb	myeloid leukocyte differentiation	0.159963
GO:0033993	1.68461	0.0358137	157	23	Ccl3,Klf4,Hnrnpa0,Mapkapk2,Abr,Ctsl,Litaf,Slc11a1,Adam9,Ctsh,Trib1,Mif,Ccl2,Rara,Lyn,Pid1,Mapk14,Hmgb2,Cebpb,Ptafr,Gstp1,Mapk3,Mapk1	response to lipid	0.16113
GO:0009262	3.87676	0.0359912	14	4	Rrm2,Dtymk,Rrm1,Adk	deoxyribonucleotide metabolic process	0.16113
GO:0043666	3.87676	0.0359912	14	4	Hsp90b1,Nckap1l,Fkbp1a,Ppp2r4	regulation of phosphoprotein phosphatase activity	0.16113
GO:0048147	3.87676	0.0359912	14	4	Bax,Ifi30,Trp53,Gstp1	negative regulation of fibroblast proliferation	0.16113
GO:0045765	2.11688	0.0375824	56	10	Aggf1,C3,Pf4,Plxnd1,Ctsh,Ccl2,Btg1,Thbs1,C3ar1,Ccr2	regulation of angiogenesis	0.167395
GO:0016064	2.30541	0.038024	47	9	Ptpn6,Fcgr1,Prkcd,C3,Cd74,Ptprc,H2-DMa,Fcer1g,Fcgr3	immunoglobulin mediated immune response	0.168502
GO:0000819	2.42898	0.0410839	35	7	Spag5,Top2a,Nusap1,Mad2l1,Espl1,Bub3,Spdl1	sister chromatid segregation	0.17642
GO:0008637	2.42898	0.0410839	35	7	Hk2,Akt1,Bax,Bcl2l1,Igf1,Slc25a4,Trp53	apoptotic mitochondrial changes	0.17642
GO:0045787	2.42898	0.0410839	35	7	Dusp3,Calr,Birc5,App,Nusap1,Plk1,Ccnd1	positive regulation of cell cycle	0.17642
GO:0032642	3.03124	0.0412252	21	5	Cd74,Tlr2,Pycard,Mif,Gstp1	regulation of chemokine production	0.17642
GO:0034341	3.03124	0.0412252	21	5	Aif1,Ifitm1,Slc11a1,Ccl2,Bst2	response to interferon-gamma	0.17642
GO:1901216	3.03124	0.0412252	21	5	Ccl3,Bax,Bag1,Atf4,Trp53	positive regulation of neuron death	0.17642
GO:2000107	3.03124	0.0412252	21	5	Aurkb,Cd74,Mif,Fcer1g,Ccr5	negative regulation of leukocyte apoptotic process	0.17642
GO:0000070	2.64771	0.042186	28	6	Spag5,Nusap1,Mad2l1,Espl1,Bub3,Spdl1	mitotic sister chromatid segregation	0.177305
GO:0031532	2.64771	0.042186	28	6	Eps8,Myh9,Csf1r,Ptpn1,Flna,Fes	actin cytoskeleton reorganization	0.177305
GO:0070374	2.64771	0.042186	28	6	Ccl3,Cd74,Csf1r,Pycard,Mif,Gpr183	positive regulation of ERK1 and ERK2 cascade	0.177305
GO:0048872	1.65895	0.0422445	145	21	Akt1,Spi1,Bax,Id2,Nckap1l,Cd74,Anxa1,Prdx1,Coro1a,G6pdx,Ccnb2,Lmo2,Mif,Ccl2,Lyn,Klf13,Adam17,Mapk14,Fcer1g,Pirb,Maea	homeostasis of number of cells	0.177305
GO:0008584	2.18936	0.0442002	49	9	Bax,Bcl2l1,Ubc,Sgpl1,Ctsl,Hsd17b4,Rara,Hmgb2,Eif2s2	male gonad development	0.183747
GO:0046546	2.18936	0.0442002	49	9	Bax,Bcl2l1,Ubc,Sgpl1,Ctsl,Hsd17b4,Rara,Hmgb2,Eif2s2	development of primary male sexual characteristics	0.183747
GO:0032651	3.52405	0.0455426	15	4	Ccl3,Pycard,Arrb2,Gstp1	regulation of interleukin-1 beta production	0.185788
GO:0034644	3.52405	0.0455426	15	4	Bax,Crip1,Aurkb,Trp53	cellular response to UV	0.185788
GO:0035335	3.52405	0.0455426	15	4	Ptpn6,Ptpn1,Ptpn7,Ptpre	peptidyl-tyrosine dephosphorylation	0.185788
GO:0043277	3.52405	0.0455426	15	4	Ccl2,Scarb1,Lrp1,Ccr2	apoptotic cell clearance	0.185788
GO:0010638	1.83122	0.0478934	95	15	Bax,Ranbp1,Rhoa,Srebf1,Nckap1l,Nusap1,Coro1a,Pycard,Plk1,Brd7,Slain2,Fes,Cfl1,Npm1,Trp53	positive regulation of organelle organization	0.194469
GO:0007569	2.43171	0.0489734	40	8	Calr,Fzr1,Id2,Lmna,Mif,Npm1,Trp53,Romo1	cell aging	0.195876
GO:0016125	2.43171	0.0489734	40	8	Apoe,Srebf1,App,Abcg1,Acadl,Soat1,Scarb1,Lrp1	sterol metabolic process	0.195876
GO:0071229	2.43171	0.0489734	40	8	Cdh1,Dnmt1,Bcl2l1,Anxa2,S100a10,Pid1,Cebpb,Rraga	cellular response to acid	0.195876
GO:0007088	2.53213	0.0491373	29	6	Ranbp1,Cdc42,Birc5,Nusap1,Mad2l1,Plk1	regulation of mitosis	0.195876
GO:0002819	1.98435	0.05038	65	11	Ptpn6,Fcgr1,C3,Slc11a1,Ptprc,Ccr2,Fcer1g,Fcgr3,B2m,H2-K1,H2-D1	regulation of adaptive immune response	0.199917
GO:0032943	1.70899	0.0561893	121	18	Itgb2,Bax,Ptpn6,Prkcd,Nckap1l,Cdkn1a,Aif1,Hprt,Slc11a1,Ptprc,Coro1a,Itgam,Pycard,Fkbp1a,Lyn,Ccr2,Gpr183,Trp53	mononuclear cell proliferation	0.217302
GO:0046651	1.70899	0.0561893	121	18	Itgb2,Bax,Ptpn6,Prkcd,Nckap1l,Cdkn1a,Aif1,Hprt,Slc11a1,Ptprc,Coro1a,Itgam,Pycard,Fkbp1a,Lyn,Ccr2,Gpr183,Trp53	lymphocyte proliferation	0.217302
GO:0033365	1.58716	0.0561963	165	23	Kpnb1,Ipo4,Tomm40,Calr,Bax,Xpo1,Aurkb,Rad21,Litaf,Cdkn1a,Slc11a1,Mapre1,Lmna,Prdx1,Ran,Plk1,Flna,Folr2,Tacc3,Bub1b,Mapk14,Trp53,Spdl1	protein localization to organelle	0.217302
GO:0034453	3.22986	0.0563655	16	4	Spag5,Cdc42,Nin,Cenpe	microtubule anchoring	0.217302
GO:0051438	3.22986	0.0563655	16	4	Cdc20,Fzr1,Plk1,Trib1	regulation of ubiquitin-protein ligase activity	0.217302
GO:0045862	2.42625	0.0567524	30	6	Akt1,Adam8,Plk1,Adam9,Trib1,Aurkaip1	positive regulation of proteolysis	0.217302
GO:0050684	2.42625	0.0567524	30	6	Srsf7,Eif4a3,Mbnl1,Srsf9,Rbmxl1,Npm1	regulation of mRNA processing	0.217302
GO:0050830	2.42625	0.0567524	30	6	Myo1f,Tlr2,Fgr,C5ar1,Lyz1,Lyz2	defense response to Gram-positive bacterium	0.217302
GO:0000077	2.22198	0.0582432	43	8	Mapkapk2,Cdk1,Fzr1,Plk1,Tipin,Mapk14,Trp53,Ccnd1	DNA damage checkpoint	0.218342
GO:0030099	1.56449	0.0582825	167	23	Ccl3,Spi1,Id2,Dab2,Myh9,Nckap1l,Csf1r,Adam8,Ccr1,Casp8,Pf4,Itgam,G6pdx,Trf,Lmo2,Rara,Lyn,Cd300lf,Klf13,Fes,Mapk14,Pirb,Maea	myeloid cell differentiation	0.218342
GO:0002437	2.69369	0.0584152	23	5	Fcgr1,C3,Psma1,Fcer1g,Fcgr3	inflammatory response to antigenic stimulus	0.218342
GO:0043029	2.69369	0.0584152	23	5	Akt1,Bax,Nckap1l,Coro1a,Ccnb2	T cell homeostasis	0.218342
GO:0000768	4.1488	0.0600253	10	3	Myh9,Adam8,Capn2	syncytium formation by plasma membrane fusion	0.218342
GO:0008608	4.1488	0.0600253	10	3	Spag5,Cdc42,Cenpe	attachment of spindle microtubules to kinetochore	0.218342
GO:0009124	4.1488	0.0600253	10	3	Atp5f1,Hprt,Pid1	nucleoside monophosphate biosynthetic process	0.218342
GO:0018279	4.1488	0.0600253	10	3	Vcp,Stt3b,Krtcap2	protein N-linked glycosylation via asparagine	0.218342
GO:0030521	4.1488	0.0600253	10	3	Rhoa,Igf1,Fkbp4	androgen receptor signaling pathway	0.218342
GO:0032873	4.1488	0.0600253	10	3	Dusp3,Cdc42se1,Gstp1	negative regulation of stress-activated MAPK cascade	0.218342
GO:0033599	4.1488	0.0600253	10	3	Bax,Phb2,Ccnd1	regulation of mammary gland epithelial cell proliferation	0.218342
GO:0034381	4.1488	0.0600253	10	3	Ehd1,Msr1,Scarb1	plasma lipoprotein particle clearance	0.218342
GO:0009306	1.88618	0.0663915	74	12	Ccl3,Lcp2,Plek,Clec4n,Rabgef1,Tlr2,Fgr,Clec5a,Clec4e,Pycard,Lyn,AF251705	protein secretion	0.240497
GO:0051302	1.98616	0.0668858	59	10	Calr,Ranbp1,Cdc20,Cdc42,Birc5,Fzr1,Nusap1,Mad2l1,Plk1,Pin1	regulation of cell division	0.241286
GO:0001836	2.55147	0.0683306	24	5	Akt1,Bax,Bcl2l1,Igf1,Trp53	release of cytochrome c from mitochondria	0.241896
GO:0007040	2.55147	0.0683306	24	5	Atp6v0c,Hexa,Chmp5,Ppt1,Tpp1	lysosome organization	0.241896
GO:0061041	2.55147	0.0683306	24	5	Plek,Prkcd,Anxa2,Lyn,Fcer1g	regulation of wound healing	0.241896
GO:0046785	2.98076	0.0684402	17	4	Nin,Mapre1,Slain2,Fes	microtubule polymerization	0.241896
GO:0048525	2.98076	0.0684402	17	4	Ccl3,Ifitm1,Ifitm3,Bst2	negative regulation of viral reproduction	0.241896
GO:0046661	1.90759	0.0735766	61	10	Bax,Bcl2l1,Ubc,Sgpl1,Ctsl,Hsd17b4,Fkbp4,Rara,Hmgb2,Eif2s2	male sex differentiation	0.25854
GO:0051047	1.79797	0.0737417	77	12	Ccl3,Glud1,Clec4n,Serp1,Tlr2,Fgr,Clec5a,Clec4e,Pycard,Mif,AF251705,Fcer1g	positive regulation of secretion	0.25854
GO:0006949	3.62934	0.0769563	11	3	Myh9,Adam8,Capn2	syncytium formation	0.261412
GO:0015909	3.62934	0.0769563	11	3	Anxa1,Plin2,Mif	long-chain fatty acid transport	0.261412
GO:0019432	3.62934	0.0769563	11	3	Srebf1,C3,Scarb1	triglyceride biosynthetic process	0.261412
GO:0031113	3.62934	0.0769563	11	3	Mapre1,Slain2,Fes	regulation of microtubule polymerization	0.261412
GO:0031503	3.62934	0.0769563	11	3	Birc5,Ran,Fkbp4	protein complex localization	0.261412
GO:0034394	3.62934	0.0769563	11	3	Cdh1,Flna,Arf6	protein localization to cell surface	0.261412
GO:0043516	3.62934	0.0769563	11	3	Cd74,Mif,Npm1	regulation of DNA damage response, signal transduction by p53 class mediator	0.261412
GO:0045931	3.62934	0.0769563	11	3	Dusp3,Birc5,App	positive regulation of mitotic cell cycle	0.261412
GO:0051347	1.51517	0.0774646	164	22	Cdc20,Cdc42,Fzr1,Pik3r5,Dab2,Csf1r,Adam8,Slc11a1,Ptprc,Hspa5,Cdc25b,Tpx2,Lamtor2,Iqgap1,Plk1,Trib1,Trf,Mif,Map2k2,Lyn,Npm1,Ccnd1	positive regulation of transferase activity	0.261559
GO:0030183	1.87038	0.0775989	62	10	Bax,Ptpn6,Id2,Nckap1l,Ptprc,Gpr183,Adam17,Nfam1,Trp53,Lgals1	B cell differentiation	0.261559
GO:0031334	1.99261	0.0785048	47	8	Bax,Rhoa,Plek,Nckap1l,Coro1a,Pycard,Slain2,Fes	positive regulation of protein complex assembly	0.263595
GO:0071230	2.42354	0.0791168	25	5	Cdh1,Dnmt1,Bcl2l1,Cebpb,Rraga	cellular response to amino acid stimulus	0.264632
GO:0006935	1.53164	0.0807448	170	23	Itgb2,Ccl3,Nckap1l,App,Aif1,Cd74,Adam8,Ccr1,Spp1,Pf4,Coro1a,Itgam,Mpp1,Ccl12,Ccl2,Camk1d,C3ar1,Ccr2,C5ar1,B3gnt2,Fcer1g,Fcgr3,Rhog	chemotaxis	0.268237
GO:0002711	2.7675	0.0817309	18	4	Ptprc,B2m,H2-K1,H2-D1	positive regulation of T cell mediated immunity	0.268237
GO:0032611	2.7675	0.0817309	18	4	Ccl3,Pycard,Arrb2,Gstp1	interleukin-1 beta production	0.268237
GO:0045727	2.7675	0.0817309	18	4	Ddx3x,Fam129a,Serp1,Pcbp1	positive regulation of translation	0.268237
GO:0071482	2.7675	0.0817309	18	4	Bax,Crip1,Aurkb,Trp53	cellular response to light stimulus	0.268237
GO:0045582	2.1927	0.0837573	38	7	Hsp90aa1,Nckap1l,Cd74,Adam8,Ptprc,H2-DMa,Ccr2	positive regulation of T cell differentiation	0.273858
GO:0022618	2.12372	0.0891136	39	7	Ddx3x,Eif3d,Srsf1,Dync1h1,Patl2,Mbnl1,Lsm14a	ribonucleoprotein complex assembly	0.289205
GO:0051651	2.12372	0.0891136	39	7	Spag5,Apoe,Cdc42,Nin,Flna,Tacc3,Cenpe	maintenance of location in cell	0.289205
GO:0006006	1.98881	0.090606	53	9	Hk2,Akt1,Igf1,Tpi1,Fabp5,Serp1,Pgd,Atf4,Mapk14	glucose metabolic process	0.291569
GO:0045766	2.30762	0.090757	26	5	Aggf1,C3,Ctsh,Btg1,C3ar1	positive regulation of angiogenesis	0.291569
GO:0051046	1.53209	0.0916937	155	21	Ccl3,Napa,Rala,Abr,Rab3d,Srebf1,Glud1,Clec4n,Rabgef1,Serp1,Tlr2,Fgr,Clec5a,Clec4e,Pycard,Mif,Lyn,AF251705,Ccr2,Fes,Fcer1g	regulation of secretion	0.291569
GO:0042098	1.71118	0.0918974	87	13	Itgb2,Bax,Ptpn6,Nckap1l,Aif1,Slc11a1,Ptprc,Coro1a,Itgam,Pycard,Fkbp1a,Ccr2,Trp53	T cell proliferation	0.291569
GO:0045185	2.05898	0.0952172	40	7	Spag5,Cdc42,Pfn1,Nin,Flna,Tacc3,Cenpe	maintenance of protein location	0.291569
GO:0001773	3.22561	0.0957125	12	3	Spi1,Pycard,Pirb	myeloid dendritic cell activation	0.291569
GO:0006693	3.22561	0.0957125	12	3	Cd74,Fam213b,Tnfrsf1a	prostaglandin metabolic process	0.291569
GO:0009303	3.22561	0.0957125	12	3	Gm21988,Trp53,Rnasek	rRNA transcription	0.291569
GO:0014812	3.22561	0.0957125	12	3	Aif1,Lrp1,Tmsb4x	muscle cell migration	0.291569
GO:0043368	3.22561	0.0957125	12	3	Cd74,Ptprc,H2-DMa	positive T cell selection	0.291569
GO:0045648	3.22561	0.0957125	12	3	Id2,Nckap1l,Mapk14	positive regulation of erythrocyte differentiation	0.291569
GO:0046889	3.22561	0.0957125	12	3	Srebf1,Abcg1,Scarb1	positive regulation of lipid biosynthetic process	0.291569
GO:0051384	3.22561	0.0957125	12	3	Ctsl,Adam9,Gstp1	response to glucocorticoid stimulus	0.291569
GO:0070527	3.22561	0.0957125	12	3	Plek,Prkcd,Lyn	platelet aggregation	0.291569
GO:0071156	3.22561	0.0957125	12	3	Foxm1,Id2,Trp53	regulation of cell cycle arrest	0.291569
GO:2000134	3.22561	0.0957125	12	3	Brd7,Trp53,Ccnd1	negative regulation of G1/S transition of mitotic cell cycle	0.291569
GO:0006487	2.58258	0.0961876	19	4	Rpn2,Vcp,Stt3b,Krtcap2	protein N-linked glycosylation	0.291569
GO:0031572	2.58258	0.0961876	19	4	Mapkapk2,Cdk1,Fzr1,Plk1	G2/M transition DNA damage checkpoint	0.291569
GO:2000377	2.58258	0.0961876	19	4	Prkcd,Pid1,Gstp1,Romo1	regulation of reactive oxygen species metabolic process	0.291569
GO:0008154	1.90167	0.0975526	55	9	Pfn1,Prkcd,Nckap1l,Aif1,Diap1,Mtpn,Coro1a,Pycard,Cfl1	actin polymerization or depolymerization	0.293667
GO:0072593	1.90167	0.0975526	55	9	Cybb,Prkcd,Prdx5,Prdx4,Prdx1,Pid1,Atpif1,Gstp1,Romo1	reactive oxygen species metabolic process	0.293667
GO:0006417	1.75422	0.100084	72	11	Ddx3x,App,Fam129a,Caprin1,Patl2,Serp1,Aco1,Aars,Rara,Ppp1r15b,Pcbp1	regulation of translation	0.299223
GO:0045088	1.75422	0.100084	72	11	Mapkapk2,Myo1f,Cd74,Adam8,Ccr1,Tlr2,Fgr,Pycard,Tlr13,Lyn,Arrb2	regulation of innate immune response	0.299223
GO:0002526	2.20221	0.103227	27	5	Fcgr1,C3,Adam8,Fcer1g,Fcgr3	acute inflammatory response	0.305483
GO:0051209	2.20221	0.103227	27	5	Ccl3,Bax,Ero1l,Ptprc,Fkbp1a	release of sequestered calcium ion into cytosol	0.305483
GO:0071241	2.20221	0.103227	27	5	Hmox1,Id2,Fos,Mt1,Fabp4	cellular response to inorganic substance	0.305483
GO:0006396	1.47248	0.10581	168	22	Nhp2,Srsf1,Sf3a2,Pabpn1,App,Srsf7,Eif4a3,Mbnl1,Ebna1bp2,Srrm1,Cpsf3l,Srsf9,Ddx54,Wbp11,Aars,Rbmxl1,Hnrnpf,Pcbp1,Npm1,Phf5a,Snrnp70,Gm20521	RNA processing	0.312067
GO:0002218	1.94065	0.109584	42	7	Mapkapk2,Adam8,Tlr2,Pycard,Tlr13,Lyn,Arrb2	activation of innate immune response	0.317774
GO:0015758	1.94065	0.109584	42	7	Hk2,Akt1,Igf1,C3,Fabp5,Slc2a1,Pid1	glucose transport	0.317774
GO:0030041	1.94065	0.109584	42	7	Pfn1,Prkcd,Nckap1l,Aif1,Diap1,Coro1a,Pycard	actin filament polymerization	0.317774
GO:0051495	1.94065	0.109584	42	7	Rhoa,Nckap1l,Coro1a,Pycard,Slain2,Fes,Cfl1	positive regulation of cytoskeleton organization	0.317774
GO:0007030	2.42084	0.111749	20	4	Tmed10,Map2k2,Mapk3,Mapk1	Golgi organization	0.317774
GO:0018208	2.42084	0.111749	20	4	P4hb,Fkbp4,Fkbp1a,Fkbp2	peptidyl-proline modification	0.317774
GO:0030330	2.42084	0.111749	20	4	Cd74,Mif,Npm1,Trp53	DNA damage response, signal transduction by p53 class mediator	0.317774
GO:0030890	2.42084	0.111749	20	4	Nckap1l,Cdkn1a,Ptprc,Gpr183	positive regulation of B cell proliferation	0.317774
GO:0032615	2.42084	0.111749	20	4	Prkcd,Tlr2,G6pdx,Arrb2	interleukin-12 production	0.317774
GO:0032729	2.42084	0.111749	20	4	Hspd1,Slc11a1,Pycard,Ccr2	positive regulation of interferon-gamma production	0.317774
GO:0071356	2.42084	0.111749	20	4	Tnfrsf1b,Tnfrsf1a,Ccl2,Pid1	cellular response to tumor necrosis factor	0.317774
GO:0031529	2.90252	0.116112	13	3	Aif1,Csf1r,Cyfip1	ruffle organization	0.321832
GO:0032370	2.90252	0.116112	13	3	Abcg1,Mif,Lrp1	positive regulation of lipid transport	0.321832
GO:0034605	2.90252	0.116112	13	3	Rbbp7,Hsf3,Myof	cellular response to heat	0.321832
GO:0045124	2.90252	0.116112	13	3	Csf1r,Adam8,Trf	regulation of bone resorption	0.321832
GO:0046605	2.90252	0.116112	13	3	Ranbp1,Xpo1,Npm1	regulation of centrosome cycle	0.321832
GO:0051983	2.90252	0.116112	13	3	Spag5,Cdc42,Bub3	regulation of chromosome segregation	0.321832
GO:0097028	2.90252	0.116112	13	3	Spi1,Lyn,Pirb	dendritic cell differentiation	0.321832
GO:0051494	2.23871	0.116125	32	6	Pfn1,Prkcd,Mapre1,Mtpn,Fkbp4,Coro1a	negative regulation of cytoskeleton organization	0.321832
GO:0008064	1.88622	0.117802	43	7	Pfn1,Prkcd,Nckap1l,Mtpn,Coro1a,Pycard,Cfl1	regulation of actin polymerization or depolymerization	0.323762
GO:0042100	1.88622	0.117802	43	7	Bax,Prkcd,Nckap1l,Cdkn1a,Ptprc,Lyn,Gpr183	B cell proliferation	0.323762
GO:0071396	1.71764	0.117934	80	12	Ccl3,Litaf,Mif,Ccl2,Rara,Lyn,Pid1,Mapk14,Ptafr,Gstp1,Mapk3,Mapk1	cellular response to lipid	0.323762
GO:0032507	2.15541	0.121765	33	6	Spag5,Cdc42,Nin,Flna,Tacc3,Cenpe	maintenance of protein location in cell	0.333231
GO:0051251	1.58863	0.128703	107	15	Hsp90aa1,Nckap1l,Cdkn1a,Aif1,Cd74,Adam8,Hspd1,Ptprc,Coro1a,Pycard,Ccl2,H2-DMa,Ccr2,Gpr183,Lgals1	positive regulation of lymphocyte activation	0.351118
GO:0071417	1.57124	0.130517	108	15	Cdh1,Akt1,Dnmt1,Bcl2l1,Hsp90b1,Srebf1,Prkcd,Ptpra,Ptpn1,Tlr2,Myo5a,Ptpre,Cebpb,Gstp1,Rraga	cellular response to organic nitrogen	0.354956
GO:0006641	2.00604	0.1361	35	6	Lpl,Srebf1,C3,Dbi,Abhd5,Scarb1	triglyceride metabolic process	0.365423
GO:0031398	2.00604	0.1361	35	6	Cdc20,Fzr1,Hspa5,Aimp2,Plk1,Trib1	positive regulation of protein ubiquitination	0.365423
GO:0000060	2.6383	0.137964	14	3	Cdkn1a,Slc11a1,Trp53	protein import into nucleus, translocation	0.365423
GO:0002920	2.6383	0.137964	14	3	Ptpn6,C3,Ptprc	regulation of humoral immune response	0.365423
GO:0006636	2.6383	0.137964	14	3	Cd74,Fam213b,Alox5ap	unsaturated fatty acid biosynthetic process	0.365423
GO:0006687	2.6383	0.137964	14	3	Bax,B4galnt1,Hexa	glycosphingolipid metabolic process	0.365423
GO:0032613	2.6383	0.137964	14	3	Prkcd,G6pdx,Fcer1g	interleukin-10 production	0.365423
GO:0046456	2.6383	0.137964	14	3	Cd74,Fam213b,Alox5ap	icosanoid biosynthetic process	0.365423
GO:0043523	1.57652	0.138132	86	12	Ccl3,Bax,Bcl2l1,Rhoa,Birc5,Adam8,Bag1,Mt1,Aars,Atf4,Trp53,Prkcg	regulation of neuron apoptotic process	0.365423
GO:0002683	1.50526	0.141329	112	15	Dusp3,Ptpn6,Abr,Id2,Cd74,Rabgef1,Ccr1,Ptprc,Psma1,Milr1,Lyn,Bst2,Ccr2,Pcbp2,Arrb2	negative regulation of immune system process	0.370886
GO:0016042	1.80584	0.141472	51	8	Apoe,Lpl,Ywhah,Hexa,Acadl,Acot7,Abhd5,Scarb1	lipid catabolic process	0.370886
GO:0050671	1.80584	0.141472	51	8	Nckap1l,Cdkn1a,Aif1,Ptprc,Coro1a,Pycard,Ccr2,Gpr183	positive regulation of lymphocyte proliferation	0.370886
GO:0030833	1.93885	0.144698	36	6	Pfn1,Prkcd,Nckap1l,Mtpn,Coro1a,Pycard	regulation of actin filament polymerization	0.377927
GO:0001974	2.151	0.14589	22	4	Bax,Igf1,Pbrm1,Ccr2	blood vessel remodeling	0.377927
GO:0007098	2.151	0.14589	22	4	Ranbp1,Kif11,Xpo1,Npm1	centrosome cycle	0.377927
GO:0010332	2.151	0.14589	22	4	Bax,Bcl2l1,Apobec1,Trp53	response to gamma radiation	0.377927
GO:0007127	1.76446	0.147382	52	8	Ubc,Ehmt2,Pttg1,Top2a,Psmd13,Cdc25b,Espl1,Cks2	meiosis I	0.378426
GO:0009411	1.76446	0.147382	52	8	Bax,Crip1,Aurkb,Cdkn1a,Tipin,2810417H13Rik,Trp53,Ccnd1	response to UV	0.378426
GO:0050851	1.76446	0.147382	52	8	Dusp3,Ptpn6,Nckap1l,Ptprc,Lat2,Lyn,Nfam1,Mapk1	antigen receptor-mediated signaling pathway	0.378426
GO:0016071	1.49836	0.151962	120	16	Srsf1,Sf3a2,Pabpn1,App,Srsf7,Eif4a3,Mbnl1,Srrm1,Srsf9,Rbmxl1,Apobec1,Pcbp1,Npm1,Phf5a,Snrnp70,Gm20521	mRNA metabolic process	0.384553
GO:0033077	1.72492	0.153974	53	8	Ncaph2,Cd74,Adam8,Ptprc,H2-DMa,Adam17,Trp53,B2m	T cell differentiation in thymus	0.384553
GO:0006413	1.8758	0.154184	37	6	Ddx3x,Eif3d,Eif3c,Rara,Ppp1r15b,Eif3b	translational initiation	0.384553
GO:0006633	1.8758	0.154184	37	6	Srebf1,Cd74,Acadl,Fam213b,Myo5a,Alox5ap	fatty acid biosynthetic process	0.384553
GO:0009308	1.8758	0.154184	37	6	Srm,Sat1,Hprt,Smox,Fabp5,Scarb1	amine metabolic process	0.384553
GO:0030316	1.8758	0.154184	37	6	Ccl3,Csf1r,Adam8,Trf,Cd300lf,Mapk14	osteoclast differentiation	0.384553
GO:0042102	1.8758	0.154184	37	6	Nckap1l,Aif1,Ptprc,Coro1a,Pycard,Ccr2	positive regulation of T cell proliferation	0.384553
GO:0050728	1.8758	0.154184	37	6	Apoe,Abr,Rabgef1,Tnfrsf1b,Psma1,Nt5e	negative regulation of inflammatory response	0.384553
GO:0051297	1.8758	0.154184	37	6	Ranbp1,Kif11,Xpo1,Plk1,2810417H13Rik,Npm1	centrosome organization	0.384553
GO:0061024	1.38564	0.15766	185	23	Akt1,Bax,Fcgr1,Tmed10,Dab2,Nckap1l,Myl12a,Aif1,Ssna1,Lmna,Tpst2,Cd9,Arl6ip1,Flna,Folr2,Myo5a,Sirpa,Arf6,Myof,Fcer1g,Fcgr3,Trp53,Rhog	membrane organization	0.384553
GO:0007265	1.52293	0.158075	96	13	Foxm1,Cdc42,Rhoa,Dbnl,Dok2,Aif1,Arhgdia,Rabgef1,Rsu1,Sdcbp,Wasf2,Rasa2,Dgkz	Ras protein signal transduction	0.384553
GO:0000413	2.41814	0.161069	15	3	Fkbp4,Fkbp1a,Fkbp2	protein peptidyl-prolyl isomerization	0.384553
GO:0007091	2.41814	0.161069	15	3	Mad2l1,Plk1,Bub1b	mitotic metaphase/anaphase transition	0.384553
GO:0009620	2.41814	0.161069	15	3	Clec4n,Tlr2,Cotl1	response to fungus	0.384553
GO:0010259	2.41814	0.161069	15	3	Ctsl,Serp1,Trp53	multicellular organismal aging	0.384553
GO:0016601	2.41814	0.161069	15	3	Dbnl,Aif1,Wasf2	Rac protein signal transduction	0.384553
GO:0031577	2.41814	0.161069	15	3	Birc5,Mad2l1,Bub3	spindle checkpoint	0.384553
GO:0032760	2.41814	0.161069	15	3	Ccl3,Tlr2,Fcer1g	positive regulation of tumor necrosis factor production	0.384553
GO:0033143	2.41814	0.161069	15	3	Phb2,Rhoa,Igf1	regulation of intracellular steroid hormone receptor signaling pathway	0.384553
GO:0040020	2.41814	0.161069	15	3	Calr,Cdc20,Fzr1	regulation of meiosis	0.384553
GO:0043534	2.41814	0.161069	15	3	Myh9,Itgb1,Scarb1	blood vessel endothelial cell migration	0.384553
GO:0045061	2.41814	0.161069	15	3	Cd74,Ptprc,H2-DMa	thymic T cell selection	0.384553
GO:0050732	2.41814	0.161069	15	3	Ptpn6,Prkcd,Ptprc	negative regulation of peptidyl-tyrosine phosphorylation	0.384553
GO:0051289	2.41814	0.161069	15	3	Aldoa,Dctpp1,Atpif1	protein homotetramerization	0.384553
GO:0070059	2.41814	0.161069	15	3	Bax,Ero1l,Atf4	intrinsic apoptotic signaling pathway in response to endoplasmic reticulum stress	0.384553
GO:0009165	1.68709	0.161222	54	8	Atp5f1,Rrm2,Hprt,Dtymk,Rrm1,G6pdx,Adk,Pid1	nucleotide biosynthetic process	0.384553
GO:0009991	1.61974	0.163784	77	11	Akt1,Ctsd,Srebf1,Fos,Ctsl,Mkks,Slc2a1,Aes,Usf2,Gstp1,Ldha	response to extracellular stimulus	0.388543
GO:0019216	1.61974	0.163784	77	11	Apoe,Psap,Cdc42,Srebf1,Id2,Abcg1,C3,Acadl,Abhd5,Scarb1,Lyn	regulation of lipid metabolic process	0.388543
GO:0045732	1.81692	0.164509	38	6	Akt1,Fzr1,Adam8,Plk1,Adam9,Trib1	positive regulation of protein catabolic process	0.389204
GO:0043161	1.49642	0.174275	105	14	Ube2c,Akt1,Sirt2,Hsp90b1,Fzr1,Cdc34,Derl1,Vcp,Edem1,Plk1,Stt3b,Trib1,Man1b1,Pcbp2	proteasomal ubiquitin-dependent protein catabolic process	0.411194
GO:0030518	2.1062	0.179157	28	5	Phb2,Rhoa,Ywhah,Igf1,Fkbp4	intracellular steroid hormone receptor signaling pathway	0.420442
GO:0051262	2.1062	0.179157	28	5	Rrm2,Aldoa,Rrm1,Dctpp1,Atpif1	protein tetramerization	0.420442
GO:0010498	1.44781	0.185129	108	14	Ube2c,Akt1,Sirt2,Hsp90b1,Fzr1,Cdc34,Derl1,Vcp,Edem1,Plk1,Stt3b,Trib1,Man1b1,Pcbp2	proteasomal protein catabolic process	0.423548
GO:0002532	2.23165	0.185231	16	3	Il17ra,Fcer1g,Alox5ap	production of molecular mediator involved in inflammatory response	0.423548
GO:0006378	2.23165	0.185231	16	3	Pabpn1,App,Gm20521	mRNA polyadenylation	0.423548
GO:0006970	2.23165	0.185231	16	3	Ddx3x,Bax,Trp53	response to osmotic stress	0.423548
GO:0007034	2.23165	0.185231	16	3	Snx27,Chmp5,Vps29	vacuolar transport	0.423548
GO:0046850	2.23165	0.185231	16	3	Csf1r,Adam8,Trf	regulation of bone remodeling	0.423548
GO:0051329	2.23165	0.185231	16	3	App,Anp32b,Mcmbp	interphase of mitotic cell cycle	0.423548
GO:0060749	2.23165	0.185231	16	3	Phb2,Id2,Ccnd1	mammary gland alveolus development	0.423548
GO:0061377	2.23165	0.185231	16	3	Phb2,Id2,Ccnd1	mammary gland lobule development	0.423548
GO:0030832	1.83496	0.185521	44	7	Pfn1,Prkcd,Nckap1l,Mtpn,Coro1a,Pycard,Cfl1	regulation of actin filament length	0.423548
GO:0006913	1.42543	0.185824	141	18	Kpnb1,Ipo4,Xpo1,Xpo7,Litaf,Cdkn1a,Hspa9,Slc11a1,Lmna,Prdx1,Ran,Flna,Tacc3,Mybbp1a,Sfn,Mapk14,Npm1,Trp53	nucleocytoplasmic transport	0.423548
GO:0006576	2.01809	0.187273	29	5	Srm,Sat1,Smox,Fabp5,Scarb1	cellular biogenic amine metabolic process	0.423548
GO:0030168	2.01809	0.187273	29	5	Plek,Prkcd,Pf4,Lyn,Fcer1g	platelet activation	0.423548
GO:0042632	2.01809	0.187273	29	5	Apoe,Npc2,Ehd1,Scarb1,Fabp4	cholesterol homeostasis	0.423548
GO:0031668	1.61736	0.188864	63	9	Ctsd,Srebf1,Fos,Ctsl,Slc2a1,Aes,Usf2,Gstp1,Ldha	cellular response to extracellular stimulus	0.426042
GO:0001819	1.55519	0.190443	87	12	Ccl3,Il17ra,Cd74,Adam8,Hspd1,Slc11a1,Tlr2,Pycard,Mif,C3ar1,Ccr2,Fcer1g	positive regulation of cytokine production	0.426834
GO:0010035	1.55519	0.190443	87	12	Hmox1,Crip1,Id2,Fos,Pdcd6,Prdx5,Aco1,Prdx1,Mt1,Ppp1r15b,Lig1,Fabp4	response to inorganic substance	0.426834
GO:0045621	1.78636	0.190682	45	7	Hsp90aa1,Nckap1l,Cd74,Adam8,Ptprc,H2-DMa,Ccr2	positive regulation of lymphocyte differentiation	0.426834
GO:0034504	1.58764	0.19466	64	9	Calr,Xpo1,Litaf,Cdkn1a,Lmna,Prdx1,Flna,Tacc3,Mapk14	protein localization to nucleus	0.433735
GO:0042113	1.4445	0.196251	116	15	Bax,Ptpn6,Id2,Prkcd,Nckap1l,Cdkn1a,Pfdn1,Ptprc,Lat2,Lyn,Gpr183,Adam17,Nfam1,Trp53,Lgals1	B cell activation	0.433735
GO:0006606	1.5142	0.196584	89	12	Kpnb1,Ipo4,Litaf,Cdkn1a,Slc11a1,Lmna,Prdx1,Ran,Flna,Tacc3,Mapk14,Trp53	protein import into nucleus	0.433735
GO:1901214	1.5142	0.196584	89	12	Ccl3,Bax,Bcl2l1,Rhoa,Birc5,Adam8,Bag1,Mt1,Aars,Atf4,Trp53,Prkcg	regulation of neuron death	0.433735
GO:0055092	1.93705	0.196669	30	5	Apoe,Npc2,Ehd1,Scarb1,Fabp4	sterol homeostasis	0.433735
GO:0008643	1.74022	0.196746	46	7	Hk2,Akt1,Igf1,C3,Fabp5,Slc2a1,Pid1	carbohydrate transport	0.433735
GO:0007264	1.41589	0.202777	118	15	Foxm1,Cdc42,Rhoa,Dbnl,Dok2,Aif1,Arhgdia,Rabgef1,Rsu1,Sdcbp,Wasf2,Rasa2,Dgkz,Cdc42se1,Rap1b	small GTPase mediated signal transduction	0.445906
GO:0051170	1.47529	0.204658	91	12	Kpnb1,Ipo4,Litaf,Cdkn1a,Slc11a1,Lmna,Prdx1,Ran,Flna,Tacc3,Mapk14,Trp53	nuclear import	0.448911
GO:0006959	1.86207	0.207247	31	5	Ptpn6,C3,Ptprc,Ccr2,Gpr183	humoral immune response	0.45119
GO:0007093	1.86207	0.207247	31	5	Cdk1,Mad2l1,Tipin,Trp53,Ccnd1	mitotic cell cycle checkpoint	0.45119
GO:0031109	1.86207	0.207247	31	5	Nin,Mapre1,Fkbp4,Slain2,Fes	microtubule polymerization or depolymerization	0.45119
GO:0050863	1.44172	0.210151	124	16	Dusp3,Ptpn6,Hsp90aa1,Nckap1l,Aif1,Cd74,Adam8,Hspd1,Ptprc,Coro1a,Pycard,Csk,Ccl2,H2-DMa,Ccr2,Lgals1	regulation of T cell activation	0.456372
GO:0034101	1.56572	0.217343	72	10	Spi1,Id2,Nckap1l,Prdx1,G6pdx,Lmo2,Lyn,Klf13,Mapk14,Maea	erythrocyte homeostasis	0.470713
GO:0009128	1.79284	0.218911	32	5	Ddx3x,Ahsa1,Hprt,Nt5e,Atp6v1g1	purine nucleoside monophosphate catabolic process	0.470713
GO:0060401	1.79284	0.218911	32	5	Ccl3,Bax,Ero1l,Ptprc,Fkbp1a	cytosolic calcium ion transport	0.470713
GO:0060402	1.79284	0.218911	32	5	Ccl3,Bax,Ero1l,Ptprc,Fkbp1a	calcium ion transport into cytosol	0.470713
GO:0051402	1.45177	0.223375	100	13	Ccl3,Bax,Bcl2l1,Rhoa,Birc5,App,Adam8,Bag1,Mt1,Aars,Atf4,Trp53,Prkcg	neuron apoptotic process	0.475151
GO:0008202	1.51621	0.225929	74	10	Apoe,Ywhah,Sgpl1,Srebf1,App,Abcg1,Acadl,Soat1,Scarb1,Lrp1	steroid metabolic process	0.475151
GO:0045637	1.51621	0.225929	74	10	Ccl3,Id2,Nckap1l,Pf4,Lmo2,Rara,Lyn,Klf13,Fes,Mapk14	regulation of myeloid cell differentiation	0.475151
GO:0000082	1.57712	0.229142	50	7	Ddx3x,Dbf4,Aif1,Itgb1,Brd7,Trp53,Ccnd1	G1/S transition of mitotic cell cycle	0.475151
GO:0010952	1.57712	0.229142	50	7	Ddx3x,Bax,Pdcd6,Fn1,Vcp,Pycard,Ctsh	positive regulation of peptidase activity	0.475151
GO:0042176	1.49259	0.231093	75	10	Akt1,Cdc42,Fzr1,Xpo1,Adam8,Mad2l1,Plk1,Flna,Adam9,Trib1	regulation of protein catabolic process	0.475151
GO:0002224	1.72848	0.231566	33	5	Mapkapk2,Tlr2,Tlr13,Lyn,Arrb2	toll-like receptor signaling pathway	0.475151
GO:0030888	1.72848	0.231566	33	5	Nckap1l,Cdkn1a,Ptprc,Lyn,Gpr183	regulation of B cell proliferation	0.475151
GO:0032273	1.72848	0.231566	33	5	Nckap1l,Coro1a,Pycard,Slain2,Fes	positive regulation of protein polymerization	0.475151
GO:0000079	1.93349	0.235964	18	3	Cdkn1a,Sfn,Ccnd1	regulation of cyclin-dependent protein kinase activity	0.475151
GO:0043154	1.93349	0.235964	18	3	Ddx3x,Akt1,Birc5	negative regulation of cysteine-type endopeptidase activity involved in apoptotic process	0.475151
GO:0043631	1.93349	0.235964	18	3	Pabpn1,App,Gm20521	RNA polyadenylation	0.475151
GO:2000117	1.93349	0.235964	18	3	Ddx3x,Akt1,Birc5	negative regulation of cysteine-type endopeptidase activity	0.475151
GO:0000245	2.41546	0.240569	10	2	Srsf1,Mbnl1	spliceosomal complex assembly	0.475151
GO:0006695	2.41546	0.240569	10	2	Srebf1,Abcg1	cholesterol biosynthetic process	0.475151
GO:0006739	2.41546	0.240569	10	2	Pgd,G6pdx	NADP metabolic process	0.475151
GO:0006900	2.41546	0.240569	10	2	Tmed10,Dab2	membrane budding	0.475151
GO:0008333	2.41546	0.240569	10	2	Snx27,Chmp5	endosome to lysosome transport	0.475151
GO:0010874	2.41546	0.240569	10	2	Abcg1,Lrp1	regulation of cholesterol efflux	0.475151
GO:0031063	2.41546	0.240569	10	2	Srebf1,Trp53	regulation of histone deacetylation	0.475151
GO:0032731	2.41546	0.240569	10	2	Ccl3,Pycard	positive regulation of interleukin-1 beta production	0.475151
GO:0033198	2.41546	0.240569	10	2	Hsp90b1,Sell	response to ATP	0.475151
GO:0045730	2.41546	0.240569	10	2	Slc11a1,Camk1d	respiratory burst	0.475151
GO:0045777	2.41546	0.240569	10	2	Id2,G6pdx	positive regulation of blood pressure	0.475151
GO:0046902	2.41546	0.240569	10	2	Bax,Trp53	regulation of mitochondrial membrane permeability	0.475151
GO:0048661	2.41546	0.240569	10	2	Id2,Aif1	positive regulation of smooth muscle cell proliferation	0.475151
GO:0050860	2.41546	0.240569	10	2	Dusp3,Ptpn6	negative regulation of T cell receptor signaling pathway	0.475151
GO:0051647	2.41546	0.240569	10	2	Cdc42,Tacc3	nucleus localization	0.475151
GO:0060351	2.41546	0.240569	10	2	Rara,Thbs1	cartilage development involved in endochondral bone morphogenesis	0.475151
GO:0060479	2.41546	0.240569	10	2	Igf1,Aimp2	lung cell differentiation	0.475151
GO:0070242	2.41546	0.240569	10	2	Adam8,Trp53	thymocyte apoptotic process	0.475151
GO:0071158	2.41546	0.240569	10	2	Id2,Trp53	positive regulation of cell cycle arrest	0.475151
GO:0071173	2.41546	0.240569	10	2	Mad2l1,Bub3	spindle assembly checkpoint	0.475151
GO:0071347	2.41546	0.240569	10	2	Ccl2,Rbmxl1	cellular response to interleukin-1	0.475151
GO:0090003	2.41546	0.240569	10	2	Arf6,Rhog	regulation of establishment of protein localization to plasma membrane	0.475151
GO:2000178	2.41546	0.240569	10	2	Id2,Trp53	negative regulation of neural precursor cell proliferation	0.475151
GO:0046890	1.66856	0.245119	34	5	Srebf1,Abcg1,C3,Acadl,Scarb1	regulation of lipid biosynthetic process	0.481957
GO:0050885	1.66856	0.245119	34	5	Abr,App,Hexa,Tpp1,Aars	neuromuscular process controlling balance	0.481957
GO:0045089	1.58288	0.247955	57	8	Mapkapk2,Cd74,Adam8,Tlr2,Pycard,Tlr13,Lyn,Arrb2	positive regulation of innate immune response	0.486438
GO:0006605	1.3575	0.24959	147	18	Kpnb1,Ipo4,Tomm40,Ywhab,Litaf,Cdkn1a,Myl12a,Slc11a1,Lmna,Prdx1,Ran,Arl6ip1,Flna,Folr2,Tacc3,Ywhag,Mapk14,Trp53	protein targeting	0.488547
GO:0043524	1.55092	0.253728	58	8	Bax,Bcl2l1,Rhoa,Birc5,Adam8,Mt1,Aars,Prkcg	negative regulation of neuron apoptotic process	0.495161
GO:0033674	1.33625	0.254103	149	18	Cdc42,Pik3r5,Dab2,Csf1r,Adam8,Slc11a1,Ptprc,Hspa5,Cdc25b,Tpx2,Lamtor2,Iqgap1,Trf,Mif,Map2k2,Lyn,Npm1,Ccnd1	positive regulation of kinase activity	0.495161
GO:0051259	1.46242	0.254758	84	11	Cdh1,Bax,Mgst1,Rrm2,Olfm1,Aldoa,Rrm1,Rbmxl1,Dctpp1,Atpif1,Npm1	protein oligomerization	0.495332
GO:0070613	1.52022	0.260218	59	8	Akt1,Plgrkt,C3,Adam8,Plk1,Adam9,Trib1,Aurkaip1	regulation of protein processing	0.497842
GO:0006898	1.76153	0.261285	39	6	Fcgr1,Dab2,Rabgef1,Lrp1,Mapk3,Mapk1	receptor-mediated endocytosis	0.497842
GO:0031023	1.76153	0.261285	39	6	Ranbp1,Kif11,Xpo1,Plk1,2810417H13Rik,Npm1	microtubule organizing center organization	0.497842
GO:0006260	1.42287	0.263564	86	11	Cdt1,Gmnn,Ehmt2,Top2a,Fen1,Nasp,Mcm7,2810417H13Rik,Mcmbp,Lig1,Trp53	DNA replication	0.497842
GO:0044242	1.70939	0.267033	40	6	Lpl,Hexa,Acadl,Acot7,Abhd5,Scarb1	cellular lipid catabolic process	0.497842
GO:0016525	2.03744	0.267173	23	4	Pf4,Ccl2,Thbs1,Ccr2	negative regulation of angiogenesis	0.497842
GO:0051897	2.03744	0.267173	23	4	Igf1,Pik3r5,Adam8,Arrb2	positive regulation of protein kinase B signaling cascade	0.497842
GO:0000302	1.66024	0.273852	41	6	Prdx5,Prdx1,Ppp1r15b,Lig1,Gstp1,Romo1	response to reactive oxygen species	0.497842
GO:0006639	1.66024	0.273852	41	6	Lpl,Srebf1,C3,Dbi,Abhd5,Scarb1	acylglycerol metabolic process	0.497842
GO:0031638	1.66024	0.273852	41	6	Bax,Plgrkt,Pdcd6,Vcp,Pycard,Ctsh	zymogen activation	0.497842
GO:0015807	1.93527	0.276662	24	4	Slc7a8,Slc11a1,Slc43a2,Slc7a5	L-amino acid transport	0.497842
GO:0031110	1.93527	0.276662	24	4	Mapre1,Fkbp4,Slain2,Fes	regulation of microtubule polymerization or depolymerization	0.497842
GO:0042770	1.93527	0.276662	24	4	Cd74,Mif,Npm1,Trp53	signal transduction in response to DNA damage	0.497842
GO:0042990	1.93527	0.276662	24	4	Litaf,Prdx1,Flna,Tacc3	regulation of transcription factor import into nucleus	0.497842
GO:0045453	1.93527	0.276662	24	4	Csf1r,Adam8,Tpp1,Trf	bone resorption	0.497842
GO:0000381	2.14663	0.276927	11	2	Mbnl1,Rbmxl1	regulation of alternative mRNA splicing, via spliceosome	0.497842
GO:0002455	2.14663	0.276927	11	2	Ptpn6,Ptprc	humoral immune response mediated by circulating immunoglobulin	0.497842
GO:0010822	2.14663	0.276927	11	2	Bax,Trp53	positive regulation of mitochondrion organization	0.497842
GO:0010828	2.14663	0.276927	11	2	Igf1,C3	positive regulation of glucose transport	0.497842
GO:0031122	2.14663	0.276927	11	2	Slain2,Tacc3	cytoplasmic microtubule organization	0.497842
GO:0032374	2.14663	0.276927	11	2	Abcg1,Lrp1	regulation of cholesterol transport	0.497842
GO:0032732	2.14663	0.276927	11	2	Ccl3,Pycard	positive regulation of interleukin-1 production	0.497842
GO:0033209	2.14663	0.276927	11	2	Tnfrsf1b,Tnfrsf1a	tumor necrosis factor-mediated signaling pathway	0.497842
GO:0040001	2.14663	0.276927	11	2	Nusap1,Spdl1	establishment of mitotic spindle localization	0.497842
GO:0042304	2.14663	0.276927	11	2	Srebf1,Acadl	regulation of fatty acid biosynthetic process	0.497842
GO:0042554	2.14663	0.276927	11	2	Prkcd,Gstp1	superoxide anion generation	0.497842
GO:0045071	2.14663	0.276927	11	2	Ifitm1,Bst2	negative regulation of viral genome replication	0.497842
GO:0045429	2.14663	0.276927	11	2	Hsp90aa1,Tlr2	positive regulation of nitric oxide biosynthetic process	0.497842
GO:0045471	2.14663	0.276927	11	2	Eps8,Gstp1	response to ethanol	0.497842
GO:0046627	2.14663	0.276927	11	2	Prkcd,Ptpre	negative regulation of insulin receptor signaling pathway	0.497842
GO:0048820	2.14663	0.276927	11	2	Akt1,Myo5a	hair follicle maturation	0.497842
GO:0050702	2.14663	0.276927	11	2	Ccl3,Pycard	interleukin-1 beta secretion	0.497842
GO:0050994	2.14663	0.276927	11	2	Abhd5,Scarb1	regulation of lipid catabolic process	0.497842
GO:0060442	2.14663	0.276927	11	2	Cd44,Igf1	branching involved in prostate gland morphogenesis	0.497842
GO:0071479	2.14663	0.276927	11	2	Bcl2l1,Trp53	cellular response to ionizing radiation	0.497842
GO:0071526	2.14663	0.276927	11	2	Plxnd1,Plxnb2	semaphorin-plexin signaling pathway	0.497842
GO:0006412	1.33636	0.277149	124	15	Ddx3x,Eif3d,App,Fam129a,Caprin1,Patl2,Serp1,Aco1,Mrpl51,Eif3c,Aars,Rara,Ppp1r15b,Pcbp1,Eif3b	translation	0.497842
GO:0016051	1.61381	0.281674	42	6	Mpdu1,Igf1,Akr1a1,Pgd,G6pdx,Atf4	carbohydrate biosynthetic process	0.503896
GO:0055088	1.61381	0.281674	42	6	Apoe,Npc2,Ehd1,Scarb1,Usf2,Fabp4	lipid homeostasis	0.503896
GO:0015711	1.40309	0.28451	95	12	Slc3a2,Slc7a8,Anxa1,Slc11a1,Plin2,Slc2a1,Folr2,Mif,Abca7,Scarb1,Slc43a2,Slc7a5	organic anion transport	0.506893
GO:0017038	1.40309	0.28451	95	12	Kpnb1,Ipo4,Litaf,Cdkn1a,Slc11a1,Lmna,Prdx1,Ran,Flna,Tacc3,Mapk14,Trp53	protein import	0.506893
GO:0019218	1.84267	0.287753	25	4	Apoe,Srebf1,Abcg1,Acadl	regulation of steroid metabolic process	0.510586
GO:0034612	1.84267	0.287753	25	4	Tnfrsf1b,Tnfrsf1a,Ccl2,Pid1	response to tumor necrosis factor	0.510586
GO:0006638	1.56989	0.290426	43	6	Lpl,Srebf1,C3,Dbi,Abhd5,Scarb1	neutral lipid metabolic process	0.513243
GO:0032388	1.56989	0.290426	43	6	Bax,Fgr,Flna,Sfn,Mapk14,Fcer1g	positive regulation of intracellular transport	0.513243
GO:0030218	1.47886	0.291162	68	9	Spi1,Id2,Nckap1l,G6pdx,Lmo2,Lyn,Klf13,Mapk14,Maea	erythrocyte differentiation	0.513503
GO:0005975	1.30163	0.294486	178	21	Hk2,Akt1,Man2b1,Mpdu1,Igf1,Pfkp,Dad1,Tpi1,Gusb,Fabp5,Rpn2,Serp1,Vcp,Akr1a1,Pgd,G6pdx,Stt3b,Atf4,Krtcap2,B3gnt2,Mapk14	carbohydrate metabolic process	0.518319
GO:0050730	1.45393	0.296124	69	9	Ptpn6,Prkcd,App,Cd74,Csf1r,Ptprc,Mif,Lyn,Trp53	regulation of peptidyl-tyrosine phosphorylation	0.520153
GO:0016485	1.3056	0.297562	135	16	Akt1,Bax,Plgrkt,Pdcd6,C3,Adam8,Vcp,Furin,Pycard,Plk1,Adam9,Vps35,Ctsh,Trib1,Metap2,Aurkaip1	protein processing	0.520211
GO:0051607	1.52829	0.30004	44	6	Ifitm1,Ifitm3,Ptprc,Irf5,Pycard,Pcbp2	defense response to virus	0.520211
GO:0070997	1.38686	0.305451	104	13	Ccl3,Bax,Bcl2l1,Rhoa,Birc5,App,Adam8,Bag1,Mt1,Aars,Atf4,Trp53,Prkcg	neuron death	0.520211
GO:0001818	1.48881	0.310447	45	6	Nckap1l,Slc11a1,Tlr2,Bst2,Arrb2,Gstp1	negative regulation of cytokine production	0.520211
GO:0007033	1.48881	0.310447	45	6	Ctsd,Atp6v0c,Hexa,Chmp5,Ppt1,Tpp1	vacuole organization	0.520211
GO:0042306	1.48881	0.310447	45	6	Litaf,Cdkn1a,Prdx1,Flna,Tacc3,Mapk14	regulation of protein import into nucleus	0.520211
GO:0001881	1.93172	0.31317	12	2	Dab2,Chmp5	receptor recycling	0.520211
GO:0001893	1.93172	0.31317	12	2	Akt1,Ctsl	maternal placenta development	0.520211
GO:0002446	1.93172	0.31317	12	2	Abr,Myo1f	neutrophil mediated immunity	0.520211
GO:0006301	1.93172	0.31317	12	2	Pcna,2810417H13Rik	postreplication repair	0.520211
GO:0006879	1.93172	0.31317	12	2	Aco1,Ttc7	cellular iron ion homeostasis	0.520211
GO:0009410	1.93172	0.31317	12	2	Nceh1,Gstp1	response to xenobiotic stimulus	0.520211
GO:0010824	1.93172	0.31317	12	2	Xpo1,Npm1	regulation of centrosome duplication	0.520211
GO:0010977	1.93172	0.31317	12	2	Vim,Fkbp4	negative regulation of neuron projection development	0.520211
GO:0016126	1.93172	0.31317	12	2	Srebf1,Abcg1	sterol biosynthetic process	0.520211
GO:0032091	1.93172	0.31317	12	2	Bax,Mapk3	negative regulation of protein binding	0.520211
GO:0032855	1.93172	0.31317	12	2	Abr,Rhog	positive regulation of Rac GTPase activity	0.520211
GO:0034122	1.93172	0.31317	12	2	Lyn,Arrb2	negative regulation of toll-like receptor signaling pathway	0.520211
GO:0042345	1.93172	0.31317	12	2	Litaf,Prdx1	regulation of NF-kappaB import into nucleus	0.520211
GO:0042743	1.93172	0.31317	12	2	Cybb,Prdx5	hydrogen peroxide metabolic process	0.520211
GO:0043297	1.93172	0.31317	12	2	Cdh1,Rhoa	apical junction assembly	0.520211
GO:0043372	1.93172	0.31317	12	2	Nckap1l,Ccr2	positive regulation of CD4-positive, alpha-beta T cell differentiation	0.520211
GO:0046470	1.93172	0.31317	12	2	Fabp5,Scarb1	phosphatidylcholine metabolic process	0.520211
GO:0046825	1.93172	0.31317	12	2	Xpo1,Sfn	regulation of protein export from nucleus	0.520211
GO:0048821	1.93172	0.31317	12	2	G6pdx,Maea	erythrocyte development	0.520211
GO:0051180	1.93172	0.31317	12	2	Slc2a1,Folr2	vitamin transport	0.520211
GO:0051291	1.93172	0.31317	12	2	Rrm2,Rrm1	protein heterooligomerization	0.520211
GO:2001257	1.93172	0.31317	12	2	Fkbp1a,Myo5a	regulation of cation channel activity	0.520211
GO:0006275	1.68185	0.314033	27	4	Cdt1,Gmnn,Ehmt2,Trp53	regulation of DNA replication	0.520211
GO:0017148	1.68185	0.314033	27	4	Ddx3x,Caprin1,Patl2,Rara	negative regulation of translation	0.520211
GO:0001933	1.34181	0.314635	107	13	Dusp3,Bax,Ptpn6,Dusp6,Prkcd,Cdkn1a,Rabgef1,Ptprc,Fam129a,Fkbp1a,Lyn,Gstp1,Fabp4	negative regulation of protein phosphorylation	0.520221
GO:0045619	1.44747	0.321	77	10	Ptpn6,Id2,Hsp90aa1,Nckap1l,Cd74,Adam8,Ptprc,H2-DMa,Ccr2,Nfam1	regulation of lymphocyte differentiation	0.52974
GO:0010827	1.61146	0.32889	28	4	Hk2,Igf1,C3,Pid1	regulation of glucose transport	0.539702
GO:0030032	1.61146	0.32889	28	4	Vcl,Capzb,Wasf2,Cyfip1	lamellipodium assembly	0.539702
GO:0060425	1.61146	0.32889	28	4	Plod3,Ctsz,Igf1,Ctsh	lung morphogenesis	0.539702
GO:0001525	1.26669	0.330849	156	18	Aggf1,Myh9,C3,Adam8,Itgb1,Casp8,Wasf2,Pf4,Plxnd1,Anxa2,Ctsh,Ccl12,Ccl2,Btg1,Thbs1,C3ar1,Ccr2,Mapk14	angiogenesis	0.541898
GO:0007596	1.50645	0.333308	52	7	Plek,Prkcd,Pf4,Anxa2,F13a1,Lyn,Fcer1g	blood coagulation	0.544902
GO:0007599	1.47342	0.339495	53	7	Plek,Prkcd,Pf4,Anxa2,F13a1,Lyn,Fcer1g	hemostasis	0.551949
GO:0042158	1.54672	0.344685	29	4	Apoe,Nmt1,Pigq,Apobec1	lipoprotein biosynthetic process	0.551949
GO:0002820	1.75574	0.348999	13	2	Ptpn6,Ptprc	negative regulation of adaptive immune response	0.551949
GO:0006998	1.75574	0.348999	13	2	Bax,Lmna	nuclear envelope organization	0.551949
GO:0007041	1.75574	0.348999	13	2	Snx27,Chmp5	lysosomal transport	0.551949
GO:0031111	1.75574	0.348999	13	2	Mapre1,Fkbp4	negative regulation of microtubule polymerization or depolymerization	0.551949
GO:0042168	1.75574	0.348999	13	2	Blvra,Hmox1	heme metabolic process	0.551949
GO:0042267	1.75574	0.348999	13	2	Ptpn6,Prdx1	natural killer cell mediated cytotoxicity	0.551949
GO:0042531	1.75574	0.348999	13	2	Csf1r,Lyn	positive regulation of tyrosine phosphorylation of STAT protein	0.551949
GO:0043552	1.75574	0.348999	13	2	Cdc42,Lyn	positive regulation of phosphatidylinositol 3-kinase activity	0.551949
GO:0045214	1.75574	0.348999	13	2	Itgb1,Actg1	sarcomere organization	0.551949
GO:0046513	1.75574	0.348999	13	2	B4galnt1,Cers6	ceramide biosynthetic process	0.551949
GO:0051489	1.75574	0.348999	13	2	Cdc42,Prkcd	regulation of filopodium assembly	0.551949
GO:0055012	1.75574	0.348999	13	2	Lmna,Rara	ventricular cardiac muscle cell differentiation	0.551949
GO:0070306	1.75574	0.348999	13	2	Fzr1,Vim	lens fiber cell differentiation	0.551949
GO:0070555	1.75574	0.348999	13	2	Ccl2,Rbmxl1	response to interleukin-1	0.551949
GO:0071346	1.75574	0.348999	13	2	Aif1,Ccl2	cellular response to interferon-gamma	0.551949
GO:0090398	1.75574	0.348999	13	2	Calr,Id2	cellular senescence	0.551949
GO:0006979	1.38537	0.353465	88	11	Apoe,App,Prdx5,Idh1,Prdx1,G6pdx,Ppp1r15b,Lig1,Trp53,Gstp1,Romo1	response to oxidative stress	0.558001
GO:0043409	1.41148	0.354149	55	7	Dusp3,Ptpn6,Dusp6,Igf1,Lyn,Cdc42se1,Gstp1	negative regulation of MAPK cascade	0.558072
GO:0042326	1.28804	0.356757	128	15	Dusp3,Bax,Ptpn6,Dusp6,Igf1,Prkcd,Cdkn1a,Rabgef1,Ptprc,Fam129a,Fkbp1a,Lyn,Cdc42se1,Gstp1,Fabp4	negative regulation of phosphorylation	0.561169
GO:0051260	1.38241	0.362515	56	7	Cdh1,Bax,Mgst1,Aldoa,Rbmxl1,Dctpp1,Atpif1	protein homooligomerization	0.569201
GO:0045860	1.28351	0.371667	137	16	Pik3r5,Dab2,Csf1r,Adam8,Slc11a1,Ptprc,Hspa5,Cdc25b,Tpx2,Lamtor2,Iqgap1,Trf,Mif,Map2k2,Npm1,Ccnd1	positive regulation of protein kinase activity	0.581662
GO:0052547	1.29962	0.372962	93	11	Cdh1,Ddx3x,Akt1,Bax,Birc5,Pdcd6,Fn1,Vcp,Pycard,Ctsh,Serpinb6a	regulation of peptidase activity	0.581662
GO:0021782	1.61263	0.373783	35	5	Akt1,Id2,Vim,Itgam,Gstp1	glial cell development	0.581662
GO:0042157	1.61263	0.373783	35	5	Apoe,Nmt1,Pigq,Ppt1,Apobec1	lipoprotein metabolic process	0.581662
GO:0045638	1.61263	0.373783	35	5	Ccl3,Pf4,Lmo2,Lyn,Klf13	negative regulation of myeloid cell differentiation	0.581662
GO:0031667	1.43493	0.376063	62	8	Akt1,Ctsd,Srebf1,Ctsl,Mkks,Slc2a1,Usf2,Gstp1	response to nutrient levels	0.581704
GO:0032869	1.43493	0.376063	62	8	Akt1,Srebf1,Prkcd,Ptpra,Ptpn1,Myo5a,Ptpre,Gstp1	cellular response to insulin stimulus	0.581704
GO:0043281	1.43493	0.376063	62	8	Cdh1,Ddx3x,Akt1,Bax,Birc5,Pdcd6,Vcp,Pycard	regulation of cysteine-type endopeptidase activity involved in apoptotic process	0.581704
GO:0010942	1.26214	0.376475	139	16	Ddx3x,Ccl3,Bax,Bcl2l1,Dusp6,Cdkn1a,Anxa1,Adam8,Itm2c,Ptprc,Pdia3,Bag1,Lyn,Atf4,Trp53,Rraga	positive regulation of cell death	0.581704
GO:0051604	1.25171	0.379386	140	16	Akt1,Bax,Plgrkt,Pdcd6,C3,Adam8,Vcp,Furin,Pycard,Plk1,Adam9,Vps35,Ctsh,Trib1,Metap2,Aurkaip1	protein maturation	0.58226
GO:0046822	1.40857	0.380505	63	8	Xpo1,Litaf,Cdkn1a,Prdx1,Flna,Tacc3,Sfn,Mapk14	regulation of nucleocytoplasmic transport	0.58226
GO:0048771	1.40857	0.380505	63	8	Bax,Igf1,Csf1r,Adam8,Tpp1,Trf,Pbrm1,Ccr2	tissue remodeling	0.58226
GO:0050777	1.56031	0.381031	36	5	Ptpn6,Ccr1,Ptprc,Psma1,Ccr2	negative regulation of immune response	0.58226
GO:0000380	1.60914	0.384171	14	2	Mbnl1,Rbmxl1	alternative mRNA splicing, via spliceosome	0.58226
GO:0009247	1.60914	0.384171	14	2	B4galnt1,Pigq	glycolipid biosynthetic process	0.58226
GO:0030851	1.60914	0.384171	14	2	Spi1,Rara	granulocyte differentiation	0.58226
GO:0035456	1.60914	0.384171	14	2	Ifitm1,Bst2	response to interferon-beta	0.58226
GO:0050701	1.60914	0.384171	14	2	Ccl3,Pycard	interleukin-1 secretion	0.58226
GO:0050810	1.60914	0.384171	14	2	Srebf1,Abcg1	regulation of steroid biosynthetic process	0.58226
GO:0070232	1.60914	0.384171	14	2	Adam8,Trp53	regulation of T cell apoptotic process	0.58226
GO:0006261	1.4652	0.398701	38	5	Cdt1,Top2a,Mcm7,Mcmbp,Lig1	DNA-dependent DNA replication	0.60115
GO:0008037	1.4652	0.398701	38	5	Fcgr1,App,Sirpa,Scarb1,Fcgr3	cell recognition	0.60115
GO:0043407	1.4652	0.398701	38	5	Dusp3,Ptpn6,Dusp6,Lyn,Gstp1	negative regulation of MAP kinase activity	0.60115
GO:0007050	1.42183	0.408926	39	5	Foxm1,Id2,Cdkn1a,Ppm1g,Trp53	cell cycle arrest	0.615504
GO:0001959	1.81225	0.415056	19	3	Cd74,Rabgef1,Ptprc	regulation of cytokine-mediated signaling pathway	0.620452
GO:0015908	1.81225	0.415056	19	3	Anxa1,Plin2,Mif	fatty acid transport	0.620452
GO:0032436	1.81225	0.415056	19	3	Akt1,Plk1,Trib1	positive regulation of proteasomal ubiquitin-dependent protein catabolic process	0.620452
GO:0042311	1.81225	0.415056	19	3	Apoe,Plod3,G6pdx	vasodilation	0.620452
GO:0030258	1.38095	0.41995	40	5	Apoe,Abcg1,Acadl,Adipor1,Mapk14	lipid modification	0.626694
GO:0032269	1.21287	0.424067	171	19	Ddx3x,Dusp3,Bax,Ptpn6,Dusp6,Hmg20b,Prkcd,Cdkn1a,Rabgef1,Ptprc,Fam129a,Caprin1,Patl2,Fkbp1a,Mif,Rara,Lyn,Gstp1,Fabp4	negative regulation of cellular protein metabolic process	0.627835
GO:0006873	1.28086	0.426742	120	14	Ccl3,Apoe,Bax,Ero1l,App,Atp6v0c,Slc11a1,Ptprc,Aco1,Atp2a2,Mt1,Fkbp1a,Ttc7,Ccr2	cellular ion homeostasis	0.627835
GO:0007043	1.70534	0.427186	20	3	Cdh1,Rhoa,Cd9	cell-cell junction assembly	0.627835
GO:0007595	1.70534	0.427186	20	3	Nme1,Usf2,Ccnd1	lactation	0.627835
GO:0031058	1.70534	0.427186	20	3	Srebf1,Brd7,Trp53	positive regulation of histone modification	0.627835
GO:0046148	1.70534	0.427186	20	3	Aprt,Hprt,Myo5a	pigment biosynthetic process	0.627835
GO:0048730	1.70534	0.427186	20	3	Klf4,Plod3,Cdc42	epidermis morphogenesis	0.627835
GO:0050798	1.70534	0.427186	20	3	Itgb2,Itgam,Pycard	activated T cell proliferation	0.627835
GO:0071897	1.70534	0.427186	20	3	Cdkn1a,Pcna,2810417H13Rik	DNA biosynthetic process	0.627835
GO:0006470	1.28088	0.433846	77	9	Dusp3,Ptpn6,Dusp6,Ptprc,Ptpn1,Nceh1,Ppm1g,Ptpn7,Ptpre	protein dephosphorylation	0.635482
GO:0032872	1.28088	0.433846	77	9	Dusp3,Dab2,Prdx1,Trf,Map2k2,Cdc42se1,Gstp1,Mapk3,Mapk1	regulation of stress-activated MAPK cascade	0.635482
GO:0030048	1.6103	0.440857	21	3	Myh9,Wasf2,Myo5a	actin filament-based movement	0.639316
GO:0032755	1.6103	0.440857	21	3	Tlr2,Pycard,Fcer1g	positive regulation of interleukin-6 production	0.639316
GO:0042542	1.6103	0.440857	21	3	Prdx5,Ppp1r15b,Lig1	response to hydrogen peroxide	0.639316
GO:0043279	1.6103	0.440857	21	3	Bcl2l1,Fkbp1a,Prkcg	response to alkaloid	0.639316
GO:0045058	1.6103	0.440857	21	3	Cd74,Ptprc,H2-DMa	T cell selection	0.639316
GO:0046324	1.6103	0.440857	21	3	Hk2,Igf1,Pid1	regulation of glucose import	0.639316
GO:0006865	1.38168	0.451654	48	6	Slc3a2,Slc7a8,Slc11a1,Folr2,Slc43a2,Slc7a5	amino acid transport	0.650565
GO:0009636	1.38168	0.451654	48	6	Ccl3,Bax,Crip1,Jak1,Mt1,Gstp1	response to toxin	0.650565
GO:0043491	1.38168	0.451654	48	6	Ccl3,Akt1,Igf1,Pik3r5,Adam8,Arrb2	protein kinase B signaling cascade	0.650565
GO:0009408	1.52527	0.455801	22	3	Rbbp7,Hsf3,Myof	response to heat	0.650565
GO:0019395	1.52527	0.455801	22	3	Acadl,Adipor1,Mapk14	fatty acid oxidation	0.650565
GO:0045446	1.52527	0.455801	22	3	Plod3,Btg1,Pbrm1	endothelial cell differentiation	0.650565
GO:0046323	1.52527	0.455801	22	3	Hk2,Igf1,Pid1	glucose import	0.650565
GO:0046580	1.52527	0.455801	22	3	Rabgef1,Rasa2,Dgkz	negative regulation of Ras protein signal transduction	0.650565
GO:0055072	1.52527	0.455801	22	3	Slc11a1,Aco1,Ttc7	iron ion homeostasis	0.650565
GO:0009725	1.21121	0.456066	135	15	Akt1,Srebf1,Ctsl,Prkcd,Adipor1,Mkks,Ptpra,Ptpn1,Adam9,Myo5a,Ptpre,Lyn,Pid1,Hmgb2,Gstp1	response to hormone stimulus	0.650565
GO:0001934	1.20001	0.457798	200	22	Cdc42,Pik3r5,Dab2,C3,Cd74,Csf1r,Adam8,Slc11a1,Ptprc,Fam129a,Hspa5,Cdc25b,Tpx2,Lamtor2,Iqgap1,Trf,Mif,Map2k2,Lyn,Npm1,Trp53,Ccnd1	positive regulation of protein phosphorylation	0.65197
GO:0043068	1.20096	0.459242	136	15	Ddx3x,Ccl3,Bax,Bcl2l1,Dusp6,Cdkn1a,Anxa1,Adam8,Itm2c,Ptprc,Pdia3,Bag1,Lyn,Atf4,Trp53	positive regulation of programmed cell death	0.652961
GO:0031647	1.31837	0.466346	50	6	Calr,Cdc42,Pycard,Flna,Ifi30,Ctsh	regulation of protein stability	0.659838
GO:0051271	1.31837	0.466346	50	6	Abr,Rabgef1,Ifitm1,Lrp1,Bst2,Actn4	negative regulation of cellular component movement	0.659838
GO:0071901	1.31837	0.466346	50	6	Dusp3,Ptpn6,Dusp6,Cdkn1a,Lyn,Gstp1	negative regulation of protein serine/threonine kinase activity	0.659838
GO:0006801	1.44874	0.471773	23	3	Prkcd,Prdx1,Gstp1	superoxide metabolic process	0.666436
GO:0006631	1.26818	0.475519	95	11	Srebf1,Hsd17b4,Cd74,Acadl,Adipor1,Acot7,Fam213b,Tnfrsf1a,Myo5a,Mapk14,Alox5ap	fatty acid metabolic process	0.669562
GO:0042060	1.26818	0.475519	95	11	Cd44,Plek,Prkcd,Slc11a1,Fn1,Pf4,Anxa2,F13a1,Lyn,Myof,Fcer1g	wound healing	0.669562
GO:0050878	1.2382	0.482004	97	11	Cdh1,Plek,Prkcd,Pf4,Anxa2,Nme1,F13a1,Lyn,Usf2,Fcer1g,Ccnd1	regulation of body fluid levels	0.6776
GO:0003158	1.3795	0.488553	24	3	Plod3,Btg1,Pbrm1	endothelium development	0.679151
GO:0006611	1.3795	0.488553	24	3	Xpo1,Hspa9,Sfn	protein export from nucleus	0.679151
GO:0006612	1.3795	0.488553	24	3	Myl12a,Arl6ip1,Folr2	protein targeting to membrane	0.679151
GO:0007044	1.3795	0.488553	24	3	Plec,Fn1,Tln1	cell-substrate junction assembly	0.679151
GO:0034109	1.3795	0.488553	24	3	Plek,Prkcd,Lyn	homotypic cell-cell adhesion	0.679151
GO:0034614	1.3795	0.488553	24	3	Prdx5,Prdx1,Romo1	cellular response to reactive oxygen species	0.679151
GO:0050873	1.3795	0.488553	24	3	Ero1l,Cebpb,Fabp4	brown fat cell differentiation	0.679151
GO:0048871	1.20958	0.490144	99	11	Bax,Ubc,Csf1r,Adam8,Acadl,Slc11a1,Mkks,Coro1a,Tpp1,Ctsh,Trf	multicellular organismal homeostasis	0.680279
GO:0008344	1.32768	0.493222	58	7	Cstb,Eps8,App,Hexa,Ppt1,Atp1a3,Arrb2	adult locomotory behavior	0.682382
GO:0045580	1.32768	0.493222	58	7	Hsp90aa1,Nckap1l,Cd74,Adam8,Ptprc,H2-DMa,Ccr2	regulation of T cell differentiation	0.682382
GO:0001824	1.3019	0.498172	59	7	Cdh1,Psmc3,Dad1,Capn2,Nasp,Grn,Wdr74	blastocyst development	0.688139
GO:0018108	1.22296	0.50218	107	12	Ptpn6,Prkcd,App,Cd74,Csf1r,Ptprc,Jak1,Fgr,Mif,Lyn,Fes,Trp53	peptidyl-tyrosine phosphorylation	0.69258
GO:0006446	1.31655	0.505944	25	3	Ddx3x,Rara,Ppp1r15b	regulation of translational initiation	0.69339
GO:0030838	1.31655	0.505944	25	3	Nckap1l,Coro1a,Pycard	positive regulation of actin filament polymerization	0.69339
GO:0033135	1.31655	0.505944	25	3	Bax,Cdc42,Mif	regulation of peptidyl-serine phosphorylation	0.69339
GO:0043589	1.31655	0.505944	25	3	Klf4,Plod3,Cdc42	skin morphogenesis	0.69339
GO:0030098	1.17306	0.510961	176	19	Spi1,Bax,Ptpn6,Ncaph2,Id2,Hsp90aa1,Nckap1l,Cd74,Anxa1,Adam8,Ptprc,H2-DMa,Ccr2,Gpr183,Adam17,Nfam1,Trp53,B2m,Lgals1	lymphocyte differentiation	0.699167
GO:0006875	1.18482	0.512679	110	12	Ccl3,Apoe,Bax,Ero1l,App,Ptprc,Aco1,Atp2a2,Mt1,Fkbp1a,Ttc7,Ccr2	cellular metal ion homeostasis	0.70042
GO:0045639	1.48695	0.522061	30	4	Id2,Nckap1l,Fes,Mapk14	positive regulation of myeloid cell differentiation	0.710987
GO:0050773	1.48695	0.522061	30	4	Ywhah,Caprin1,Camk1d,Arf6	regulation of dendrite development	0.710987
GO:0043405	1.19863	0.522857	118	13	Dusp3,Ptpn6,Dusp6,Pik3r5,Dab2,Adam8,Ptprc,Trib1,Trf,Mif,Map2k2,Lyn,Gstp1	regulation of MAP kinase activity	0.710987
GO:0001894	1.24784	0.534572	70	8	Bax,Csf1r,Adam8,Mkks,Coro1a,Tpp1,Ctsh,Trf	tissue homeostasis	0.725788
GO:0046849	1.38022	0.53698	32	4	Csf1r,Adam8,Tpp1,Trf	bone remodeling	0.727925
GO:0032868	1.20837	0.54432	72	8	Akt1,Srebf1,Prkcd,Ptpra,Ptpn1,Myo5a,Ptpre,Gstp1	response to insulin stimulus	0.736731
GO:0048545	1.33237	0.545882	33	4	Ctsl,Adam9,Hmgb2,Gstp1	response to steroid hormone stimulus	0.737701
GO:0006919	1.28772	0.555586	34	4	Bax,Pdcd6,Vcp,Pycard	activation of cysteine-type endopeptidase activity involved in apoptotic process	0.746195
GO:0030850	1.28772	0.555586	34	4	Psap,Cd44,Igf1,Fkbp4	prostate gland development	0.746195
GO:0032387	1.28772	0.555586	34	4	Litaf,Rabgef1,Tacc3,Bst2	negative regulation of intracellular transport	0.746195
GO:0032649	1.28772	0.555586	34	4	Hspd1,Slc11a1,Pycard,Ccr2	regulation of interferon-gamma production	0.746195
GO:0030879	1.22604	0.560499	80	9	Bax,Phb2,Igf1,Id2,Nme1,Cebpb,Usf2,Mapk1,Ccnd1	mammary gland development	0.751637
GO:0050852	1.24594	0.565983	35	4	Dusp3,Ptpn6,Ptprc,Mapk1	T cell receptor signaling pathway	0.756666
GO:0050871	1.24594	0.565983	35	4	Nckap1l,Cdkn1a,Ptprc,Gpr183	positive regulation of B cell activation	0.756666
GO:0006874	1.19198	0.568015	82	9	Ccl3,Apoe,Bax,Ero1l,App,Ptprc,Atp2a2,Fkbp1a,Ccr2	cellular calcium ion homeostasis	0.758222
GO:0030162	1.14718	0.572142	151	16	Cdh1,Ddx3x,Akt1,Bax,Birc5,Pdcd6,Adam8,Fn1,Vcp,Pycard,Plk1,Adam9,Ctsh,Trib1,Serpinb6a,Aurkaip1	regulation of proteolysis	0.762565
GO:0006665	1.34233	0.585751	41	5	Bax,B4galnt1,Hexa,Cers6,Sphk2	sphingolipid metabolic process	0.775965
GO:0043280	1.34233	0.585751	41	5	Ddx3x,Bax,Pdcd6,Vcp,Pycard	positive regulation of cysteine-type endopeptidase activity involved in apoptotic process	0.775965
GO:0050731	1.34233	0.585751	41	5	Cd74,Csf1r,Mif,Lyn,Trp53	positive regulation of peptidyl-tyrosine phosphorylation	0.775965
GO:2000021	1.34233	0.585751	41	5	Ccl3,Bax,Ero1l,Ptprc,Fkbp1a	regulation of ion homeostasis	0.775965
GO:2001056	1.30581	0.590551	42	5	Ddx3x,Bax,Pdcd6,Vcp,Pycard	positive regulation of cysteine-type endopeptidase activity	0.781138
GO:0008286	1.2712	0.596092	43	5	Srebf1,Prkcd,Ptpra,Ptpn1,Ptpre	insulin receptor signaling pathway	0.787274
GO:0006323	1.23837	0.602307	44	5	Asf1b,Top2a,Nusap1,Smc2,Smc4	DNA packaging	0.791888
GO:0007204	1.23837	0.602307	44	5	Ccl3,Bax,Ero1l,Ptprc,Fkbp1a	elevation of cytosolic calcium ion concentration	0.791888
GO:0010950	1.23837	0.602307	44	5	Ddx3x,Bax,Pdcd6,Vcp,Pycard	positive regulation of endopeptidase activity	0.791888
GO:0032870	1.15607	0.609286	103	11	Akt1,Srebf1,Prkcd,Adipor1,Mkks,Ptpra,Ptpn1,Myo5a,Ptpre,Pid1,Gstp1	cellular response to hormone stimulus	0.799859
GO:0009566	1.1775	0.616497	46	5	Bax,Bcl2l1,Ehmt2,Tpst2,Cd9	fertilization	0.80281
GO:0006820	1.17262	0.62045	111	12	Slc3a2,Slc7a8,Anxa1,Slc11a1,Plin2,Slc2a1,Folr2,Mif,Abca7,Scarb1,Slc43a2,Slc7a5	anion transport	0.80281
GO:0006520	1.13744	0.627174	114	12	Ddah2,Mgst1,Dhfr,Tdh,P4hb,Idh1,G6pdx,Gsr,Aars,Alox5ap,Gstp1,Il4i1	cellular amino acid metabolic process	0.80281
GO:0061180	1.26056	0.62922	52	6	Bax,Phb2,Id2,Cebpb,Mapk1,Ccnd1	mammary gland epithelium development	0.80281
GO:0007160	1.2335	0.632885	53	6	Rhoa,Lims1,Adam8,Itgb1,Fn1,Sirpa	cell-matrix adhesion	0.80281
GO:0006486	1.20757	0.637108	54	6	Dad1,Rpn2,Vcp,Stt3b,Krtcap2,B3gnt2	protein glycosylation	0.80281
GO:0040013	1.1827	0.641845	55	6	Abr,Rabgef1,Ifitm1,Ifitm3,Lrp1,Bst2	negative regulation of locomotion	0.80281
GO:0006284	1.4851	0.645647	15	2	Pcna,Hmgb2	base-excision repair	0.80281
GO:0006885	1.4851	0.645647	15	2	Atp6v0c,Slc11a1	regulation of pH	0.80281
GO:0007143	1.4851	0.645647	15	2	Ubc,Cdc25b	female meiosis	0.80281
GO:0007257	1.4851	0.645647	15	2	Dab2,Trf	activation of JUN kinase activity	0.80281
GO:0014003	1.4851	0.645647	15	2	Id2,Gstp1	oligodendrocyte development	0.80281
GO:0015992	1.4851	0.645647	15	2	Atp5f1,Atp6v0b	proton transport	0.80281
GO:0035088	1.4851	0.645647	15	2	Cdc42,Ezr	establishment or maintenance of apical/basal cell polarity	0.80281
GO:0042771	1.4851	0.645647	15	2	Tmem109,Trp53	intrinsic apoptotic signaling pathway in response to DNA damage by p53 class mediator	0.80281
GO:0043330	1.4851	0.645647	15	2	Mapk3,Mapk1	response to exogenous dsRNA	0.80281
GO:0046164	1.4851	0.645647	15	2	Apoe,Scarb1	alcohol catabolic process	0.80281
GO:0046633	1.4851	0.645647	15	2	Ptprc,Ccr2	alpha-beta T cell proliferation	0.80281
GO:0048660	1.4851	0.645647	15	2	Id2,Aif1	regulation of smooth muscle cell proliferation	0.80281
GO:0060428	1.4851	0.645647	15	2	Igf1,Aimp2	lung epithelium development	0.80281
GO:0090311	1.4851	0.645647	15	2	Srebf1,Trp53	regulation of protein deacetylation	0.80281
GO:0006643	1.15882	0.647058	56	6	Bax,B4galnt1,Hexa,Pigq,Cers6,Sphk2	membrane lipid metabolic process	0.80281
GO:0042493	1.15882	0.647058	56	6	Fos,Nckap1l,Tlr2,Atp1a3,Adam17,Trp53	response to drug	0.80281
GO:0070085	1.13586	0.652703	57	6	Dad1,Rpn2,Vcp,Stt3b,Krtcap2,B3gnt2	glycosylation	0.80281
GO:0032787	1.10932	0.656591	136	14	Srebf1,Pfkp,Hsd17b4,Cd74,P4hb,Acadl,Adipor1,Akr1a1,Acot7,Fam213b,Tnfrsf1a,Myo5a,Mapk14,Alox5ap	monocarboxylic acid metabolic process	0.80281
GO:0000188	1.37877	0.657569	16	2	Dusp3,Dusp6	inactivation of MAPK activity	0.80281
GO:0002762	1.37877	0.657569	16	2	Ccl3,Lyn	negative regulation of myeloid leukocyte differentiation	0.80281
GO:0002828	1.37877	0.657569	16	2	Cd74,Ccr2	regulation of type 2 immune response	0.80281
GO:0021680	1.37877	0.657569	16	2	Hspa5,Aars	cerebellar Purkinje cell layer development	0.80281
GO:0042307	1.37877	0.657569	16	2	Flna,Mapk14	positive regulation of protein import into nucleus	0.80281
GO:0042992	1.37877	0.657569	16	2	Litaf,Tacc3	negative regulation of transcription factor import into nucleus	0.80281
GO:0043550	1.37877	0.657569	16	2	Cdc42,Lyn	regulation of lipid kinase activity	0.80281
GO:0046626	1.37877	0.657569	16	2	Prkcd,Ptpre	regulation of insulin receptor signaling pathway	0.80281
GO:0048659	1.37877	0.657569	16	2	Id2,Aif1	smooth muscle cell proliferation	0.80281
GO:0051881	1.37877	0.657569	16	2	Clic1,Pid1	regulation of mitochondrial membrane potential	0.80281
GO:0060441	1.37877	0.657569	16	2	Ctsz,Ctsh	epithelial tube branching involved in lung morphogenesis	0.80281
GO:0060716	1.37877	0.657569	16	2	Akt1,Mapk1	labyrinthine layer blood vessel development	0.80281
GO:0071453	1.37877	0.657569	16	2	Adam8,Lmna	cellular response to oxygen levels	0.80281
GO:0071456	1.37877	0.657569	16	2	Adam8,Lmna	cellular response to hypoxia	0.80281
GO:0042129	1.20797	0.661316	63	7	Ptpn6,Nckap1l,Aif1,Ptprc,Coro1a,Pycard,Ccr2	regulation of T cell proliferation	0.80281
GO:0016311	1.12467	0.663479	144	15	Dusp3,Ptpn6,Dusp6,Hsp90b1,Nckap1l,Ptprc,Ptpn1,Nceh1,Ppm1g,Iqgap1,Ptpn7,Fkbp1a,Ppp2r4,Ptpre,Fkbp15	dephosphorylation	0.80281
GO:0097193	1.18655	0.664288	64	7	Ddx3x,Bax,Vdac2,Ero1l,Tmem109,Atf4,Trp53	intrinsic apoptotic signaling pathway	0.80281
GO:0000086	1.28663	0.670388	17	2	Birc5,Plk1	G2/M transition of mitotic cell cycle	0.80281
GO:0006513	1.28663	0.670388	17	2	Uhrf1,Cdc34	protein monoubiquitination	0.80281
GO:0007608	1.28663	0.670388	17	2	Mkks,B3gnt2	sensory perception of smell	0.80281
GO:0015844	1.28663	0.670388	17	2	Fcer1g,Fcgr3	monoamine transport	0.80281
GO:0019217	1.28663	0.670388	17	2	Srebf1,Acadl	regulation of fatty acid metabolic process	0.80281
GO:0021591	1.28663	0.670388	17	2	Uchl5,Anp32b	ventricular system development	0.80281
GO:0030148	1.28663	0.670388	17	2	B4galnt1,Cers6	sphingolipid biosynthetic process	0.80281
GO:0030512	1.28663	0.670388	17	2	Hspa5,Trp53	negative regulation of transforming growth factor beta receptor signaling pathway	0.80281
GO:0032024	1.28663	0.670388	17	2	Glud1,Serp1	positive regulation of insulin secretion	0.80281
GO:0032720	1.28663	0.670388	17	2	Arrb2,Gstp1	negative regulation of tumor necrosis factor production	0.80281
GO:0033138	1.28663	0.670388	17	2	Cdc42,Mif	positive regulation of peptidyl-serine phosphorylation	0.80281
GO:0045069	1.28663	0.670388	17	2	Ifitm1,Bst2	regulation of viral genome replication	0.80281
GO:0045428	1.28663	0.670388	17	2	Hsp90aa1,Tlr2	regulation of nitric oxide biosynthetic process	0.80281
GO:0045921	1.28663	0.670388	17	2	Fgr,Fcer1g	positive regulation of exocytosis	0.80281
GO:0046427	1.28663	0.670388	17	2	Csf1r,Lyn	positive regulation of JAK-STAT cascade	0.80281
GO:0046677	1.28663	0.670388	17	2	Crip1,Jak1	response to antibiotic	0.80281
GO:0048873	1.28663	0.670388	17	2	Bax,Coro1a	homeostasis of number of cells within a tissue	0.80281
GO:0050688	1.28663	0.670388	17	2	Pycard,Pcbp2	regulation of defense response to virus	0.80281
GO:0060612	1.28663	0.670388	17	2	Ubc,Id2	adipose tissue development	0.80281
GO:0060998	1.28663	0.670388	17	2	Caprin1,Arf6	regulation of dendritic spine development	0.80281
GO:0072332	1.28663	0.670388	17	2	Tmem109,Trp53	intrinsic apoptotic signaling pathway by p53 class mediator	0.80281
GO:0090277	1.28663	0.670388	17	2	Glud1,Serp1	positive regulation of peptide hormone secretion	0.80281
GO:0006778	1.20599	0.68383	18	2	Blvra,Hmox1	porphyrin-containing compound metabolic process	0.810019
GO:0016925	1.20599	0.68383	18	2	Hmg20b,Sae1	protein sumoylation	0.810019
GO:0019079	1.20599	0.68383	18	2	Ifitm1,Bst2	viral genome replication	0.810019
GO:0030239	1.20599	0.68383	18	2	Itgb1,Actg1	myofibril assembly	0.810019
GO:0042092	1.20599	0.68383	18	2	Cd74,Ccr2	type 2 immune response	0.810019
GO:0043370	1.20599	0.68383	18	2	Nckap1l,Ccr2	regulation of CD4-positive, alpha-beta T cell differentiation	0.810019
GO:0048854	1.20599	0.68383	18	2	Uchl5,Mkks	brain morphogenesis	0.810019
GO:0050856	1.20599	0.68383	18	2	Dusp3,Ptpn6	regulation of T cell receptor signaling pathway	0.810019
GO:0032147	1.13639	0.691638	76	8	Dab2,Adam8,Slc11a1,Ptprc,Tpx2,Lamtor2,Trf,Map2k2	activation of protein kinase activity	0.813963
GO:0009101	1.11969	0.694836	77	8	Igf1,Itm2b,Dad1,Rpn2,Vcp,Stt3b,Krtcap2,B3gnt2	glycoprotein biosynthetic process	0.813963
GO:0007159	1.13483	0.697667	19	2	Ptprc,Itgam	leukocyte cell-cell adhesion	0.813963
GO:0007260	1.13483	0.697667	19	2	Csf1r,Lyn	tyrosine phosphorylation of STAT protein	0.813963
GO:0007566	1.13483	0.697667	19	2	Fkbp4,Grn	embryo implantation	0.813963
GO:0030901	1.13483	0.697667	19	2	Uchl5,Kdm7a	midbrain development	0.813963
GO:0043244	1.13483	0.697667	19	2	Mtpn,Cfl1	regulation of protein complex disassembly	0.813963
GO:0046847	1.13483	0.697667	19	2	Cdc42,Prkcd	filopodium assembly	0.813963
GO:0048708	1.13483	0.697667	19	2	Id2,Vim	astrocyte differentiation	0.813963
GO:0051298	1.13483	0.697667	19	2	Xpo1,Npm1	centrosome duplication	0.813963
GO:0051865	1.13483	0.697667	19	2	Uhrf1,Rnf13	protein autoubiquitination	0.813963
GO:0030534	1.10347	0.698348	78	8	Cstb,Eps8,App,Hexa,Ppt1,Atp1a3,Mafg,Arrb2	adult behavior	0.813963
GO:0072657	1.14424	0.706382	85	9	Bax,Myl12a,Ssna1,Arl6ip1,Flna,Folr2,Myo5a,Arf6,Rhog	protein localization to membrane	0.820763
GO:0055074	1.12915	0.70856	86	9	Ccl3,Apoe,Bax,Ero1l,App,Ptprc,Atp2a2,Fkbp1a,Ccr2	calcium ion homeostasis	0.820763
GO:0031032	1.07162	0.711704	20	2	Itgb1,Actg1	actomyosin structure organization	0.820763
GO:0042177	1.07162	0.711704	20	2	Mad2l1,Flna	negative regulation of protein catabolic process	0.820763
GO:0043113	1.07162	0.711704	20	2	Ssna1,Flna	receptor clustering	0.820763
GO:0050658	1.07162	0.711704	20	2	Npm1,Mrpl18	RNA transport	0.820763
GO:0051928	1.07162	0.711704	20	2	Ccl3,Bax	positive regulation of calcium ion transport	0.820763
GO:0060135	1.07162	0.711704	20	2	Akt1,Ctsl	maternal process involved in female pregnancy	0.820763
GO:0006917	1.08622	0.716804	89	9	Spi1,Bax,Itm2b,Shisa5,Casp6,Pycard,Cebpb,Trp53,Sp110	induction of apoptosis	0.8223
GO:0008406	1.08622	0.716804	89	9	Bax,Bcl2l1,Ubc,Sgpl1,Ctsl,Hsd17b4,Rara,Hmgb2,Eif2s2	gonad development	0.8223
GO:0031098	1.08622	0.716804	89	9	Dusp3,Dab2,Prdx1,Trf,Map2k2,Cdc42se1,Gstp1,Mapk3,Mapk1	stress-activated protein kinase signaling cascade	0.8223
GO:0051403	1.08622	0.716804	89	9	Dusp3,Dab2,Prdx1,Trf,Map2k2,Cdc42se1,Gstp1,Mapk3,Mapk1	stress-activated MAPK cascade	0.8223
GO:0048839	1.11032	0.724977	97	10	Cdh1,Mapkapk2,Abr,Igf1,Lrp10,Anp32b,C1qb,H2-DMa,H2-K1,Mafb	inner ear development	0.830584
GO:0009416	1.085	0.729579	99	10	Bax,Crip1,Aurkb,App,Cdkn1a,Tipin,2810417H13Rik,Atp1a3,Trp53,Ccnd1	response to light stimulus	0.83476
GO:0051100	1.25907	0.730819	26	3	Bax,Id2,Mapk3	negative regulation of binding	0.835085
GO:0016575	1.20638	0.736625	27	3	Sirt2,Srebf1,Trp53	histone deacetylation	0.838428
GO:0032526	1.20638	0.736625	27	3	Klf4,Ctsh,Rara	response to retinoic acid	0.838428
GO:0045669	1.20638	0.736625	27	3	Clic1,Ifitm1,Cebpb	positive regulation of osteoblast differentiation	0.838428
GO:0002286	1.15791	0.743045	28	3	Slc11a1,Ccr2,Trp53	T cell activation involved in immune response	0.840257
GO:0006200	1.15791	0.743045	28	3	Ddx3x,Ahsa1,Atp6v1g1	ATP catabolic process	0.840257
GO:0016052	1.15791	0.743045	28	3	Pfkp,Akr1a1,Pgd	carbohydrate catabolic process	0.840257
GO:0043241	1.15791	0.743045	28	3	Napa,Mtpn,Cfl1	protein complex disassembly	0.840257
GO:0090316	1.15791	0.743045	28	3	Flna,Sfn,Mapk14	positive regulation of intracellular protein transport	0.840257
GO:0006672	1.11314	0.749977	29	3	B4galnt1,Hexa,Cers6	ceramide metabolic process	0.842638
GO:0007405	1.11314	0.749977	29	3	Racgap1,Plxnb2,Trp53	neuroblast proliferation	0.842638
GO:0030307	1.11314	0.749977	29	3	Ddx3x,Mtpn,Sfn	positive regulation of cell growth	0.842638
GO:0061025	1.11314	0.749977	29	3	Bax,Tpst2,Cd9	membrane fusion	0.842638
GO:2000177	1.11314	0.749977	29	3	Igf1,Id2,Trp53	regulation of neural precursor cell proliferation	0.842638
GO:0032434	1.07176	0.757325	30	3	Akt1,Plk1,Trib1	regulation of proteasomal ubiquitin-dependent protein catabolic process	0.847621
GO:0046635	1.07176	0.757325	30	3	Nckap1l,Ptprc,Ccr2	positive regulation of alpha-beta T cell activation	0.847621
GO:0050821	1.07176	0.757325	30	3	Calr,Flna,Ifi30	protein stabilization	0.847621
GO:0006839	1.20678	0.771143	36	4	Tomm40,Bax,Mrpl18,Trp53	mitochondrial transport	0.86088
GO:0043542	1.20678	0.771143	36	4	Myh9,Itgb1,Plxnd1,Scarb1	endothelial cell migration	0.86088
GO:0002761	1.16999	0.77437	37	4	Ccl3,Id2,Rara,Lyn	regulation of myeloid leukocyte differentiation	0.862276
GO:0010951	1.16999	0.77437	37	4	Ddx3x,Akt1,Birc5,Serpinb6a	negative regulation of endopeptidase activity	0.862276
GO:0001837	1.13535	0.77807	38	4	Hnrnpab,Dab2,Adam15,Flna	epithelial to mesenchymal transition	0.864192
GO:0051896	1.13535	0.77807	38	4	Igf1,Pik3r5,Adam8,Arrb2	regulation of protein kinase B signaling cascade	0.864192
GO:0010466	1.0719	0.786686	40	4	Ddx3x,Akt1,Birc5,Serpinb6a	negative regulation of peptidase activity	0.872652
GO:0006164	1.04271	0.791504	41	4	Atp5f1,Hprt,Adk,Pid1	purine nucleotide biosynthetic process	0.873556
GO:0009267	1.04271	0.791504	41	4	Ctsd,Srebf1,Ctsl,Slc2a1	cellular response to starvation	0.873556
GO:0043270	1.04271	0.791504	41	4	Ccl3,Akt1,Bax,Mif	positive regulation of ion transport	0.873556
GO:0051168	1.04271	0.791504	41	4	Xpo1,Hspa9,Sfn,Npm1	nuclear export	0.873556
GO:0000187	1.14924	0.799556	47	5	Dab2,Adam8,Ptprc,Trf,Map2k2	activation of MAPK activity	0.8769
GO:0030073	1.14924	0.799556	47	5	Srebf1,Glud1,Il1rn,Serp1,Myo5a	insulin secretion	0.8769
GO:0030336	1.14924	0.799556	47	5	Abr,Rabgef1,Ifitm1,Lrp1,Bst2	negative regulation of cell migration	0.8769
GO:0042254	1.14924	0.799556	47	5	Ddx3x,Nhp2,Ipo4,Ebna1bp2,Npm1	ribosome biogenesis	0.8769
GO:0051480	1.14924	0.799556	47	5	Ccl3,Bax,Ero1l,Ptprc,Fkbp1a	cytosolic calcium ion homeostasis	0.8769
GO:0031669	1.12229	0.801897	48	5	Ctsd,Srebf1,Ctsl,Slc2a1,Usf2	cellular response to nutrient levels	0.877264
GO:2000146	1.12229	0.801897	48	5	Abr,Rabgef1,Ifitm1,Lrp1,Bst2	negative regulation of cell motility	0.877264
GO:0007565	1.07203	0.807568	50	5	Akt1,Ctsl,Fkbp4,Grn,Epn1	female pregnancy	0.880158
GO:0030010	1.07203	0.807568	50	5	Myh9,Arf6,Rap1b,Cfl1,Spdl1	establishment of cell polarity	0.880158
GO:0046034	1.07203	0.807568	50	5	Atp5f1,Ddx3x,Ahsa1,Atp6v1g1,Pid1	ATP metabolic process	0.880158
GO:0010921	1.026	0.81436	52	5	Hsp90b1,Nckap1l,Fkbp1a,Ppp2r4,Fkbp15	regulation of phosphatase activity	0.886454
GO:0018105	1.11379	0.819462	58	6	Akt1,Bax,Cdc42,Mif,Mapk14,Mapk1	peptidyl-serine phosphorylation	0.888684
GO:0030522	1.11379	0.819462	58	6	Phb2,Rhoa,Ywhah,Igf1,Fkbp4,Rara	intracellular receptor mediated signaling pathway	0.888684
GO:0040014	1.11379	0.819462	58	6	Apoe,Sgpl1,Lgmn,App,Mkks,G6pdx	regulation of multicellular organism growth	0.888684
GO:0007009	1.07217	0.823389	60	6	Akt1,Myl12a,Myo5a,Arf6,Myof,Rhog	plasma membrane organization	0.89073
GO:0035303	1.07217	0.823389	60	6	Hsp90b1,Nckap1l,Iqgap1,Fkbp1a,Ppp2r4,Fkbp15	regulation of dephosphorylation	0.89073
GO:0061351	1.05246	0.82572	61	6	Igf1,Id2,Racgap1,Plxnb2,Tacc3,Trp53	neural precursor cell proliferation	0.892145
GO:0031396	1.03346	0.82827	62	6	Cdc20,Fzr1,Hspa5,Aimp2,Plk1,Trib1	regulation of protein ubiquitination	0.893795
GO:0001649	1.07245	0.846144	80	8	Ccl3,Akt1,Clic1,Igf1,Id2,Ifitm1,Clec5a,Cebpb	osteoblast differentiation	0.909708
GO:0006469	1.07245	0.846144	80	8	Dusp3,Ptpn6,Dusp6,Cdkn1a,Ptprc,Lyn,Gstp1,Fabp4	negative regulation of protein kinase activity	0.909708
GO:0051098	1.07245	0.846144	80	8	Bax,Cdc42,Id2,App,Anxa2,S100a10,Hmgb2,Mapk3	regulation of binding	0.909708
GO:0033673	1.02892	0.850494	83	8	Dusp3,Ptpn6,Dusp6,Cdkn1a,Ptprc,Lyn,Gstp1,Fabp4	negative regulation of kinase activity	0.912139
GO:0043434	1.02892	0.850494	83	8	Akt1,Srebf1,Prkcd,Ptpra,Ptpn1,Myo5a,Ptpre,Gstp1	response to peptide hormone stimulus	0.912139
GO:0071902	1.04632	0.85681	92	9	Pik3r5,Dab2,Csf1r,Adam8,Ptprc,Trf,Mif,Map2k2,Ccnd1	positive regulation of protein serine/threonine kinase activity	0.917786
GO:0046578	1.06072	0.862764	101	10	Foxm1,Abr,Rabgef1,Pycard,Rasa2,Plxnb2,Tbc1d2,Dgkz,Tbc1d10b,Rhog	regulation of Ras protein signal transduction	0.923031
GO:0051051	1.01524	0.866992	105	10	Pacsin2,Abr,Srebf1,Litaf,Rabgef1,Flna,Tacc3,Pid1,Bst2,Ccr2	negative regulation of transport	0.925286
GO:0051056	1.01524	0.866992	105	10	Foxm1,Abr,Rabgef1,Pycard,Rasa2,Plxnb2,Tbc1d2,Dgkz,Tbc1d10b,Rhog	regulation of small GTPase mediated signal transduction	0.925286
GO:0010256	1.04337	0.875509	123	12	Akt1,Bax,Tmed10,Myl12a,Lmna,Myo5a,Map2k2,Arf6,Myof,Mapk3,Mapk1,Rhog	endomembrane system organization	0.932876
GO:0030217	1.03385	0.876241	124	12	Ncaph2,Hsp90aa1,Nckap1l,Cd74,Anxa1,Adam8,Ptprc,H2-DMa,Ccr2,Adam17,Trp53,B2m	T cell differentiation	0.932876
GO:0014070	1.0153	0.877983	126	12	Ccl3,Bcl2l1,Hsp90b1,Ctsl,Sell,Adam9,Fkbp1a,Hmgb2,Gstp1,Mapk3,Mapk1,Prkcg	response to organic cyclic compound	0.933592
GO:0043410	1.04568	0.880077	133	13	Ccl3,Cdc42,Pik3r5,Dab2,Cd74,Csf1r,Adam8,Ptprc,Pycard,Trf,Mif,Map2k2,Gpr183	positive regulation of MAPK cascade	0.934174
GO:0043065	1.03683	0.880671	134	13	Ddx3x,Ccl3,Bax,Bcl2l1,Dusp6,Anxa1,Adam8,Ptprc,Pdia3,Bag1,Lyn,Atf4,Trp53	positive regulation of apoptotic process	0.934174
GO:0008610	1.02326	0.885869	146	14	B4galnt1,Srebf1,Abcg1,C3,Cd74,Pigq,Acadl,Cers6,Fabp5,Fam213b,Abhd5,Myo5a,Scarb1,Alox5ap	lipid biosynthetic process	0.937411
GO:0055082	1.02326	0.885869	146	14	Ccl3,Apoe,Bax,Ero1l,App,Atp6v0c,Slc11a1,Ptprc,Aco1,Atp2a2,Mt1,Fkbp1a,Ttc7,Ccr2	cellular chemical homeostasis	0.937411
GO:0019725	1.00858	0.89416	169	16	Ccl3,Apoe,Bax,Ubc,Ero1l,App,Atp6v0c,Slc11a1,Ptprc,Aco1,Atp2a2,Mt1,Fkbp1a,Ttc7,Ccr2,Npm1	cellular homeostasis	0.945039
GO:0044257	1.02166	0.898851	188	18	Uhrf1,Ube2c,Akt1,Sirt2,Hsp90b1,Fzr1,Cdc34,Derl1,Hspa5,Vcp,Ppt1,Edem1,Plk1,Stt3b,Trib1,Isg15,Man1b1,Pcbp2	cellular protein catabolic process	0.948848
GO:0000132	1.07149	1	10	1	Spdl1	establishment of mitotic spindle orientation	1
GO:0002026	1.07149	1	10	1	Atp2a2	regulation of the force of heart contraction	1
GO:0003300	1.07149	1	10	1	Mtpn	cardiac muscle hypertrophy	1
GO:0006096	1.07149	1	10	1	Pfkp	glycolysis	1
GO:0006626	1.07149	1	10	1	Tomm40	protein targeting to mitochondrion	1
GO:0006882	1.07149	1	10	1	Mt1	cellular zinc ion homeostasis	1
GO:0006888	1.01501	1	21	2	Rab1a,Lman1	ER to Golgi vesicle-mediated transport	1
GO:0006903	1.07149	1	10	1	Tmed10	vesicle targeting	1
GO:0007176	1.07149	1	10	1	App	regulation of epidermal growth factor-activated receptor activity	1
GO:0009062	1.01501	1	21	2	Acadl,Acot7	fatty acid catabolic process	1
GO:0010631	1.00442	1	53	5	Myh9,Itgb1,Plxnd1,Ctsh,Scarb1	epithelial cell migration	1
GO:0010718	1.07149	1	10	1	Dab2	positive regulation of epithelial to mesenchymal transition	1
GO:0010811	1.03327	1	31	3	Dab2,Spp1,Thbs1	positive regulation of cell-substrate adhesion	1
GO:0010907	1.07149	1	10	1	Igf1	positive regulation of glucose metabolic process	1
GO:0015804	1.07149	1	10	1	Slc3a2	neutral amino acid transport	1
GO:0019233	1.03327	1	31	3	Ccl3,Ccr2,Mapk3	sensory perception of pain	1
GO:0020027	1.07149	1	10	1	Lyn	hemoglobin metabolic process	1
GO:0022011	1.07149	1	10	1	Akt1	myelination in peripheral nervous system	1
GO:0030199	1.01501	1	21	2	Plod3,Anxa2	collagen fibril organization	1
GO:0032412	1.03327	1	31	3	Ywhah,Fkbp1a,Myo5a	regulation of ion transmembrane transporter activity	1
GO:0033146	1.07149	1	10	1	Phb2	regulation of intracellular estrogen receptor signaling pathway	1
GO:0035909	1.07149	1	10	1	Lrp1	aorta morphogenesis	1
GO:0042104	1.07149	1	10	1	Pycard	positive regulation of activated T cell proliferation	1
GO:0042108	1.03327	1	31	3	Tlr2,Ccr2,Fcgr3	positive regulation of cytokine biosynthetic process	1
GO:0042116	1.01501	1	21	2	Slc11a1,Tyrobp	macrophage activation	1
GO:0042308	1.01501	1	21	2	Litaf,Tacc3	negative regulation of protein import into nucleus	1
GO:0042417	1.07149	1	10	1	Hprt	dopamine metabolic process	1
GO:0042832	1.07149	1	10	1	Slc11a1	defense response to protozoan	1
GO:0043406	1.00748	1	74	7	Pik3r5,Dab2,Adam8,Ptprc,Trf,Mif,Map2k2	positive regulation of MAP kinase activity	1
GO:0043616	1.07149	1	10	1	Sfn	keratinocyte proliferation	1
GO:0043687	1.07149	1	10	1	Stt3b	post-translational protein modification	1
GO:0045579	1.07149	1	10	1	Nckap1l	positive regulation of B cell differentiation	1
GO:0045671	1.07149	1	10	1	Ccl3	negative regulation of osteoclast differentiation	1
GO:0045786	1.00748	1	74	7	Foxm1,Gmnn,Id2,Cdkn1a,Ppm1g,Mad2l1,Trp53	negative regulation of cell cycle	1
GO:0045841	1.07149	1	10	1	Mad2l1	negative regulation of mitotic metaphase/anaphase transition	1
GO:0048260	1.07149	1	10	1	Dab2	positive regulation of receptor-mediated endocytosis	1
GO:0048557	1.07149	1	10	1	Id2	embryonic digestive tract morphogenesis	1
GO:0050869	1.01501	1	21	2	Id2,Lyn	negative regulation of B cell activation	1
GO:0050872	1.07149	1	10	1	Fabp4	white fat cell differentiation	1
GO:0050884	1.07149	1	10	1	Hexa	neuromuscular process controlling posture	1
GO:0060389	1.07149	1	10	1	Dab2	pathway-restricted SMAD protein phosphorylation	1
GO:0060445	1.01501	1	21	2	Cdh1,Plxnd1	branching involved in salivary gland morphogenesis	1
GO:0060996	1.01501	1	21	2	Caprin1,Arf6	dendritic spine development	1
GO:0065004	1.03327	1	31	3	Asf1b,Cenpc1,Cenpw	protein-DNA complex assembly	1
GO:0070301	1.07149	1	10	1	Prdx5	cellular response to hydrogen peroxide	1
GO:0071174	1.07149	1	10	1	Mad2l1	mitotic cell cycle spindle checkpoint	1

## Sheet: 42h up hallmark
	odds.ratio	p.value	n.categoy	n.category.and.component	genes	FDR
HALLMARK_E2F_TARGETS	3.22701	4.09265e-12	194	67	Hnrnpd,Spag5,Cse1l,Dnmt1,Lbr,Spc25,Mcm5,Asf1b,Ranbp1,Cdc20,Cdk4,Cbx5,Birc5,Srsf1,Cdk1,Tmpo,Xpo1,Pttg1,Pold2,Rrm2,Hn1,Aurkb,Top2a,Rad21,Racgap1,Cdkn1a,Cdca3,Lmnb1,Prdx4,Pa2g4,Tk1,Dut,Cdc25b,Pcna,Snrpb,Aurka,Exosc8,Cks1b,Nasp,Cdca8,Ran,Mcm7,Mad2l1,Pole4,Kif22,Plk1,Mki67,Rbbp7,Ccnb2,Tipin,Srsf2,Smc4,Tacc3,Nme1,H2afz,Ncapd2,Bub1b,Mcm3,Dctpp1,Cenpe,H2afx,Hmgb2,Lig1,Espl1,Phf5a,Cks2,Spc24	1.26872e-10
HALLMARK_MTORC1_SIGNALING	3.05898	9.13189e-11	188	63	Itgb2,Hk2,Cfp,Ifrd1,Tomm40,Calr,Atp5g1,M6pr,Uchl5,Hsp90b1,Pno1,Rab1a,Actr2,Ccng1,Rrm2,Nmt1,Lgmn,Ssr1,Glrx,Dhfr,Ero1l,Sla,Sdf2l1,Cdkn1a,Tpi1,Hspa9,Etf1,Psat1,Add3,Shmt2,Psmd13,Sec11a,Idh1,Hspd1,Tuba4a,Actr3,Fam129a,Hspa5,Aurka,Serp1,Slc2a1,Prdx1,Cct6a,Atp2a2,Pdap1,Rpn1,Slc6a6,Edem1,Cd9,Ctsc,Aldoa,Coro1a,Plk1,Gsr,Ifi30,Psma4,Slc7a5,Fkbp2,Skap2,Ldha,Eno1,Hspe1,Eif2s2	1.41544e-09
HALLMARK_G2M_CHECKPOINT	2.6715	1.3289e-08	195	60	Hnrnpd,Ube2c,Kpnb1,Dbf4,Snrpd1,Zak,Lbr,Mcm5,Cdc20,Cdk4,Kif11,Birc5,Srsf1,G3bp1,Cdk1,Tmpo,Xpo1,Pttg1,Hn1,Aurkb,Top2a,Rad21,Racgap1,Ndc80,Lmnb1,Incenp,Dtymk,Uck2,Cenpf,Nusap1,Cdc25b,Tpx2,Aurka,Ccna2,Cks1b,Smc2,Rad23b,Nasp,Cenpa,Mad2l1,Kif22,Plk1,Mki67,Gins2,Ccnb2,Kif23,Srsf2,Smc4,Tacc3,H2afz,Hnrnpu,Slc7a5,Mcm3,Cenpe,H2afx,Mapk14,Espl1,Cks2,Bub3,Ccnd1	1.3732e-07
HALLMARK_MYC_TARGETS_V1	2.40943	3.95239e-07	198	57	Hnrnpd,Nhp2,Kpnb1,Ifrd1,Snrpd1,Phb2,Hdgf,Mcm5,Ranbp1,Cdc20,Srm,Cdk4,Lsm2,Eif3d,Psmd3,Srsf1,G3bp1,Xpo1,Pold2,Cyc1,Srsf7,Etf1,Prdx4,Pa2g4,Tyms,Hspd1,Dut,Pcna,Ccna2,Eif4e,Rad23b,Ppm1g,Ran,Aimp2,Mcm7,Cbx3,Mad2l1,Psma1,Ndufab1,Rrm1,Psma4,Srsf2,Nme1,H2afz,Fam120a,Hnrnpu,Pcbp1,Set,Eif3b,Npm1,Eif4a1,Ldha,Bub3,Eif1ax,Tcp1,Hspe1,Eif2s2	3.06311e-06
HALLMARK_ALLOGRAFT_REJECTION	2.00209	0.000623265	148	38	Itgb2,Cfp,Akt1,Spi1,Lcp2,Ptpn6,Eif3d,Ccl4,Ifngr1,Ly86,Fyb,Ifngr2,Tapbp,Cd74,Ccr1,Ptprc,Tpd52,Tlr2,Fgr,Pf4,Flna,Aars,Csk,Igsf6,Ccl7,Ccl2,Nme1,Degs1,Ctss,Lyn,Stab1,Ccr2,Capg,Npm1,B2m,Ncf4,Prkcg,Ccr5	0.00386424
HALLMARK_COAGULATION	2.20601	0.00161224	90	25	Apoc2,Mmp8,Crip2,Sirt2,Dusp6,Plek,Lgmn,F2rl2,Arf4,Ctsb,C3,Anxa1,Fn1,Capn2,Gsn,Pf4,Cd9,Furin,Adam9,Ctsh,Gng12,Thbs1,Lrp1,S100a1,Gda	0.00832989
HALLMARK_MYC_TARGETS_V2	2.36063	0.00499561	58	17	Hk2,Ipo4,Mcm5,Srm,Cdk4,Pa2g4,Hspd1,Mrto4,Aimp2,Cbx3,Plk1,Nip7,Mybbp1a,Dctpp1,Wdr74,Npm1,Hspe1	0.0221234
HALLMARK_COMPLEMENT	1.72812	0.0093169	147	34	Calm1,Lcp2,Mmp8,Ctsd,Pfn1,Calm3,Dusp6,Plek,Pik3r5,Lgmn,Ctsb,Prkcd,Pla2g7,C3,Ehd1,Fn1,Hspa5,Anxa5,Ctsc,Ppp4c,Itgam,Adam9,Ctsh,C1qc,Dock10,Ctss,Lrp1,Lyn,Plaur,Mmp12,Lgals3,Cebpb,Fcer1g,Rhog	0.036103
HALLMARK_UNFOLDED_PROTEIN_RESPONSE	1.78931	0.0142215	109	26	Nhp2,Calr,Atp6v0d1,Hsp90b1,Pdia6,Ssr1,Ero1l,Tars,Hspa9,Psat1,Banf1,Eif4a3,Sec11a,Hspa5,Serp1,Cks1b,Eif4e,Edem1,Fus,Ccl2,Slc7a5,Atf4,H2afx,Cebpb,Npm1,Eif4a1	0.0489851
HALLMARK_INFLAMMATORY_RESPONSE	1.60527	0.0248801	146	32	Klf6,Lcp2,Ebi3,Cybb,Cd48,Atp2b1,Pik3r5,Ifngr2,Cdkn1a,Tapbp,Msr1,Ifitm1,Sell,Tlr2,Tnfrsf1b,Atp2a2,Clec5a,Ccl7,Ccl2,Emp3,C3ar1,Ptpre,Lyn,Stab1,Plaur,Bst2,C5ar1,Gpr183,Cd14,Ptafr,Slc31a1,Rhog	0.0771284
HALLMARK_IL6_JAK_STAT3_SIGNALING	1.89311	0.0290596	72	18	Il17ra,Ebi3,Cd44,Hmox1,Ifngr1,Pik3r5,Ifngr2,Ccr1,Ptpn1,Tlr2,Tnfrsf1b,Pf4,Tnfrsf1a,Cd9,Ccl7,Cd14,Csf2ra,Csf2rb	0.0794015
HALLMARK_PI3K_AKT_MTOR_SIGNALING	1.74623	0.0307361	98	23	Akt1,Dusp3,Rps6ka1,Calr,Cdk4,Pfn1,Ywhab,Cdk1,Hsp90b1,Actr2,Sla,Cdkn1a,Arhgdia,Actr3,Eif4e,Slc2a1,Tnfrsf1a,Pin1,Cltc,Sfn,Arf1,Cfl1,Mapk1	0.0794015
HALLMARK_UV_RESPONSE_UP	1.59636	0.0434171	128	28	Psmc3,Hmox1,Ap2s1,Cdc34,Fos,Eif5,Prkcd,Tars,Fen1,Gal,Tuba4a,Cyb5r1,Olfm1,Ppt1,Pdap1,Rpn1,Fkbp4,Furin,Aldoa,Slc25a4,Alas1,Btg1,Hnrnpu,Creg1,Lyn,H2afx,Arrb2,Ggh	0.103533
HALLMARK_OXIDATIVE_PHOSPHORYLATION	1.41808	0.0770046	191	38	Sdhd,Atp5f1,Bax,Phb2,Etfb,Por,Atp5g1,Ndufa2,Slc25a11,Atp6ap1,Ndufs6,Ndufs4,Vdac2,Glud1,Cyc1,Atp5o,Atp6v0c,Hspa9,Ndufb8,Echs1,Idh1,Ndufb5,Mrps15,Ndufab1,Oat,Slc25a4,Alas1,Polr2f,Atp6v0b,Ndufa3,Cox8a,Uqcrfs1,Atp5j2,Atp6v1g1,Mrpl35,Sdhc,Ldha,Ndufb6	0.166318
HALLMARK_MITOTIC_SPINDLE	1.38935	0.0804766	194	38	Cdc42,Kif11,Abr,Birc5,Dync1h1,Cdk1,Top2a,Nin,Vcl,Myh9,Racgap1,Ndc80,Lmnb1,Incenp,Arhgdia,Tuba4a,Cenpf,Gsn,Nusap1,Tpx2,Mapre1,Aurka,Capzb,Wasf2,Kif22,Plk1,Flna,Ccnb2,Kif23,Rasa2,Smc4,Anln,Arf6,Cenpe,Ezr,Actn4,Espl1,Sept9	0.166318
HALLMARK_APOPTOSIS	1.41947	0.117121	140	28	Bax,Cd44,Hmox1,Bcl2l1,Ifngr1,Top2a,Vdac2,App,Cdkn1a,Etf1,Anxa1,Sat1,Ifitm3,Casp8,Gsn,Cdc25b,Casp6,Lmna,Ppt1,Gsr,Rara,Mcl1,Tspo,Lgals3,Cd14,Hmgb2,Ccnd1,H1f0	0.226923
HALLMARK_HYPOXIA	1.28124	0.225677	168	31	Klf6,Hk2,S100a4,Ugp2,Hmox1,Sdc4,Pfkp,Fos,Glrx,Ero1l,Myh9,Cdkn1a,Tpi1,Prdx5,Hexa,Hspa5,Tpd52,Casp6,Plin2,Slc2a1,Tpst2,Slc6a6,Aldoa,Anxa2,Mif,Nagk,Btg1,Scarb1,Plaur,Ldha,Eno1	0.411528
HALLMARK_ADIPOGENESIS	1.27172	0.240052	180	33	Agpat3,Apoe,Etfb,Por,Reep5,Ubc,Lpl,Ifngr1,Nmt1,Dhrs7,Dnajc15,Samm50,Cyc1,Atp5o,C3,Riok3,Esyt1,Echs1,Taldo1,Idh1,Acadl,Plin2,Cmpk1,Aldoa,Ndufab1,Ucp2,Cox8a,Scarb1,Ghitm,Ppp1r15b,Ywhag,Sdhc,Fabp4	0.413423
HALLMARK_ANGIOGENESIS	1.68458	0.26894	26	6	S100a4,Lpl,App,Lrpap1,Spp1,Pf4	0.438797
HALLMARK_ESTROGEN_RESPONSE_LATE	1.22519	0.361847	157	28	Cdh1,Ckb,Klf4,Kif20a,Ptpn6,Etfb,Cd44,Cdc20,Id2,Top2a,Fos,Aldh3b1,Gal,Add3,Olfm1,Fabp5,Bag1,Jak1,Cd9,Fkbp4,Gins2,Scarb1,Slc7a5,Blvrb,Sfn,Myof,Rab31,Ccnd1	0.560863
HALLMARK_IL2_STAT5_SIGNALING	1.16703	0.442789	169	29	Klf6,Hk2,Cd44,Bcl2l1,Cd48,Ctsz,Mapkapk2,Ifngr1,F2rl2,Plec,Ifitm3,Uck2,Sell,Glipr2,Plin2,Tnfrsf1b,Spp1,Anxa4,Cyfip1,Furin,Nt5e,Rnh1,S100a1,Ckap4,Cdc42se2,Capg,Dhrs3,Ahnak,Ptrh2	0.653641
HALLMARK_TNFA_SIGNALING_VIA_NFKB	1.13311	0.516127	173	29	Klf6,Klf4,Cd44,Sdc4,Ccl4,Atp2b1,Plek,Id2,Fos,Litaf,Ifngr2,Cdkn1a,Ehd1,Sat1,Tlr2,Trib1,Ccl2,Btg1,Ninj1,Mcl1,Ptpre,Slc16a6,Plaur,Gpr183,Ier2,Cebpb,Tnfaip8,Ccnd1,Cebpd	0.6679
HALLMARK_REACTIVE_OXIGEN_SPECIES_PATHWAY	1.24595	0.528555	44	8	Mgst1,Pfkp,Glrx,Prdx4,Prdx1,Gsr,Ppp2r4,Fes	0.6679
HALLMARK_PROTEIN_SECRETION	1.18235	0.555291	92	16	Napa,M6pr,Ap2s1,Stx7,Tmed10,Cd63,Rab14,Tpd52,Clta,Ppt1,Ctsc,Snx2,Lman1,Cltc,Arf1,Mapk1	0.6679
HALLMARK_KRAS_SIGNALING_UP	1.14291	0.558104	148	25	Itgb2,Klf4,Hsd11b1,Dusp6,Id2,Nin,Glrx,Ero1l,Lcp1,Adam8,Laptm5,Tnfrsf1b,Fuca1,Spp1,Gpnmb,Trib1,Ctss,F13a1,C3ar1,Lat2,Plaur,Adam17,Fcer1g,Csf2ra,Mafb	0.6679
HALLMARK_XENOBIOTIC_METABOLISM	1.13338	0.560175	149	25	Apoe,Hmox1,Por,Ddah2,Hsd11b1,Igf1,Sar1b,Id2,Slc35b1,Nmt1,Dhrs7,Gart,Cndp2,Shmt2,Idh1,Smox,Casp6,Pgd,Atp2a2,Slc6a6,Tnfrsf1a,Gsr,Alas1,Ninj1,Blvrb	0.6679
HALLMARK_CHOLESTEROL_HOMEOSTASIS	1.21006	0.590891	62	11	Lpl,Lgmn,Gusb,Fam129a,Fabp5,Anxa5,S100a11,Cd9,Plaur,Lgals3,Actg1	0.67843
HALLMARK_PANCREAS_BETA_CELLS	1.19903	0.734303	17	3	Sec11a,Lmo2,Mafb	0.812978
HALLMARK_GLYCOLYSIS	1.04319	0.827643	172	27	Hk2,Ugp2,Kif20a,Cd44,Cdk1,Pfkp,Glrx,Ero1l,Tpi1,Ndufv3,Slc16a3,Taldo1,Gusb,Idh1,Hspa5,Aurka,Casp6,Akr1a1,Nasp,Cenpa,Fkbp4,Aldoa,Nt5e,Mif,Sdhc,Ldha,Eno1	0.87356
HALLMARK_TGF_BETA_SIGNALING	1.04073	0.84538	51	8	Cdh1,Rhoa,Id2,Ifngr2,Furin,Fkbp1a,Thbs1,Rab31	0.87356
HALLMARK_FATTY_ACID_METABOLISM	1.02681	0.900556	129	20	Sdhd,Blvra,Ncaph2,Ywhah,Hsp90aa1,Hsd17b4,Echs1,Idh1,Acadl,Erp29,Aldoa,Mif,Mcee,H2afz,Ostc,S100a10,Sdhc,Ldha,Lgals1,Il4i1	0.900556

## Sheet: 66h up GO
	odds.ratio	p.value	n.categoy	n.category.and.component	genes	description	FDR
GO:0002443	4.93775	3.14683e-09	115	25	Ccl3,Ptpn6,Rnf168,Fcgr1,Ncf1,Adora2b,Prkcd,C3,Myo1f,Cd74,Slc11a1,Prdx1,Fgr,Ctsc,Rab27a,H2-DMa,Milr1,Lyn,Ccr2,Fes,Fcer1g,Pirb,Fcgr3,B2m,H2-D1	leukocyte mediated immunity	2.87935e-06
GO:0048002	12.1744	1.91027e-08	29	12	Fcgr1,Cd74,Slc11a1,Traf6,Pycard,Ifi30,Unc93b1,H2-DMa,Fcer1g,Fcgr3,B2m,H2-D1	antigen processing and presentation of peptide antigen	7.71484e-06
GO:0006954	3.83864	2.52945e-08	164	29	Ccl3,Il17ra,Apoe,Cd44,Tnfaip8l2,Fcgr1,Ncf1,Mapkapk2,Adora2b,Tnip1,Pla2g7,C3,Adam8,Alox5,Ccr1,Slc11a1,Notch2,B4galt1,Tnfrsf1a,Nupr1,Psma1,Pycard,Thbs1,Lyn,Ccr2,Fcer1g,Fcgr3,Alox5ap,Gpx1	inflammatory response	7.71484e-06
GO:0045055	13.1893	1.73353e-07	23	10	Ccl3,Adora2b,Myo1f,Fgr,Rab27a,Milr1,Lyn,Ccr2,Fes,Fcer1g	regulated secretory pathway	3.96545e-05
GO:0045576	13.9875	5.13897e-07	20	9	Ndrg1,Adora2b,Fgr,Milr1,Ptpre,Lyn,Fes,Fcer1g,Fcgr3	mast cell activation	9.40432e-05
GO:0019882	7.65526	8.6023e-07	39	12	Fcgr1,Cd74,Slc11a1,Traf6,Pycard,Ifi30,Unc93b1,H2-DMa,Fcer1g,Fcgr3,B2m,H2-D1	antigen processing and presentation	0.000131185
GO:0051270	3.12248	1.06572e-06	194	29	Ccl3,Cnn2,Map3k1,Vcl,Myo1f,Cd74,Csf1r,Adam8,Ifitm1,Ccr1,Mkks,Tlr2,Lmna,Sema4a,B4galt1,Macf1,Fgr,Coro1a,Pycard,Trf,Plxnb2,Camk1d,Lrp1,Lyn,Ccr2,Tmsb4x,Adam17,Fes,Syne2	regulation of cellular component movement	0.000139304
GO:2000145	3.18512	1.70772e-06	177	27	Ccl3,Cnn2,Map3k1,Vcl,Myo1f,Cd74,Csf1r,Adam8,Ifitm1,Ccr1,Mkks,Tlr2,Lmna,Sema4a,Macf1,Fgr,Coro1a,Pycard,Trf,Plxnb2,Camk1d,Lrp1,Lyn,Ccr2,Tmsb4x,Fes,Syne2	regulation of cell motility	0.00019532
GO:0040012	3.04249	2.45507e-06	191	28	Ccl3,Cnn2,Map3k1,Vcl,Myo1f,Cd74,Csf1r,Adam8,Ifitm1,Ifitm3,Ccr1,Mkks,Tlr2,Lmna,Sema4a,Macf1,Fgr,Coro1a,Pycard,Trf,Plxnb2,Camk1d,Lrp1,Lyn,Ccr2,Tmsb4x,Fes,Syne2	regulation of locomotion	0.000249599
GO:0045087	3.75647	3.98618e-06	113	20	Ptpn6,Mapkapk2,Tnip1,Clec4n,Myo1f,Cd74,Adam8,Ifitm1,Ifitm3,Ccr1,Slc11a1,Lcn2,Tlr2,Prdx1,Fgr,Clec5a,Pycard,Rab27a,Unc93b1,Lyn	innate immune response	0.000314682
GO:0009617	3.27176	3.99342e-06	153	24	Ccl3,Fcgr1,Ncf1,Mapkapk2,Prkcd,Myo1f,Slc11a1,Traf6,Tlr2,Fgr,Tnfrsf1a,Tirap,Rara,Lyn,Ptgir,Wfdc21,Cebpb,Fcer1g,Irak2,B2m,Mapk3,Gpx1,Lyz2,Sp110	response to bacterium	0.000314682
GO:0002460	3.89807	4.29355e-06	104	19	Ptpn6,Rnf168,Fcgr1,Prkcd,C3,Cd74,Slc11a1,Traf6,Sema4a,Ctsc,Rab27a,H2-DMa,Ccr2,Adam17,Fcer1g,Pirb,Fcgr3,B2m,H2-D1	adaptive immune response based on somatic recombination of immune receptors built from immunoglobulin superfamily domains	0.000314682
GO:0050729	8.15714	4.47089e-06	31	10	Ccl3,Fcgr1,Adora2b,Tnip1,C3,Adam8,Tnfrsf1a,Ccr2,Fcer1g,Fcgr3	positive regulation of inflammatory response	0.000314682
GO:0019884	9.61136	4.8541e-06	25	9	Fcgr1,Cd74,Traf6,Ifi30,Unc93b1,H2-DMa,Fcer1g,Fcgr3,B2m	antigen processing and presentation of exogenous antigen	0.00031725
GO:0050900	4.47457	5.27843e-06	78	16	Itgb2,Ccl3,Itgb7,Cd74,Adam8,Ccr1,Tlr2,B4galt1,Coro1a,Itgam,Pycard,Camk1d,Selplg,Ccr2,Fcer1g,Fcgr3	leukocyte migration	0.000321984
GO:0033003	14.8649	7.55775e-06	15	7	Adora2b,Fgr,Milr1,Ptpre,Lyn,Fes,Fcer1g	regulation of mast cell activation	0.000432209
GO:0050764	7.44596	8.42822e-06	33	10	Cnn2,Fcgr1,C3,Slc11a1,Fgr,Pycard,Sirpa,Camk1d,Fcer1g,Fcgr3	regulation of phagocytosis	0.000453636
GO:0006909	5.08944	1.21697e-05	57	13	Cnn2,Fcgr1,C3,Slc11a1,Fgr,Coro1a,Pycard,Sirpa,Camk1d,Lrp1,Ccr2,Fcer1g,Fcgr3	phagocytosis	0.000618627
GO:0030334	3.00839	1.36233e-05	164	24	Ccl3,Cnn2,Map3k1,Vcl,Myo1f,Cd74,Csf1r,Adam8,Ifitm1,Ccr1,Tlr2,Lmna,Sema4a,Macf1,Fgr,Coro1a,Pycard,Plxnb2,Camk1d,Lrp1,Lyn,Ccr2,Tmsb4x,Syne2	regulation of cell migration	0.000656071
GO:0002250	3.51864	1.50858e-05	113	19	Ptpn6,Rnf168,Fcgr1,Prkcd,C3,Cd74,Slc11a1,Traf6,Sema4a,Ctsc,Rab27a,H2-DMa,Ccr2,Adam17,Fcer1g,Pirb,Fcgr3,B2m,H2-D1	adaptive immune response	0.000662262
GO:0002687	9.73595	1.53274e-05	22	8	Ccl3,Cd74,Adam8,Ccr1,Tlr2,Pycard,Camk1d,Ccr2	positive regulation of leukocyte migration	0.000662262
GO:0051272	3.83052	1.59232e-05	94	17	Ccl3,Myo1f,Cd74,Csf1r,Adam8,Ccr1,Tlr2,Fgr,Coro1a,Pycard,Trf,Camk1d,Lyn,Ccr2,Tmsb4x,Adam17,Syne2	positive regulation of cellular component movement	0.000662262
GO:0050663	5.89577	1.80199e-05	43	11	Ccl3,Srgn,Clec4n,Notch2,Tlr2,Fgr,Clec5a,Clec4e,Pycard,Lyn,S100a13	cytokine secretion	0.00071688
GO:0008360	5.28744	1.8854e-05	51	12	Ccl3,Myh9,Myl12a,Diap1,Csf1r,Sema4a,Fgr,Coro1a,Myl12b,Plxnb2,Fes,Fmnl1	regulation of cell shape	0.000717164
GO:0002366	3.95766	1.95946e-05	86	16	Ccl3,Rnf168,Adora2b,Myo1f,Slc11a1,Sema4a,Fgr,Tyrobp,Pycard,Rab27a,Milr1,Lyn,Ccr2,Fes,Fcer1g,Lgals1	leukocyte activation involved in immune response	0.000717164
GO:0002495	11.8948	2.0692e-05	17	7	Cd74,Traf6,Pycard,Ifi30,Unc93b1,H2-DMa,Fcer1g	antigen processing and presentation of peptide antigen via MHC class II	0.000728198
GO:0060627	3.37249	2.51448e-05	117	19	Cnn2,Rala,Fcgr1,Adora2b,C3,Slc11a1,Ptpn1,B4galt1,Fgr,Rest,Pycard,Sirpa,Camk1d,Lyn,Ccr2,Fes,Fcer1g,Fcgr3,Mapk3	regulation of vesicle-mediated transport	0.000852128
GO:2000147	3.7404	3.53685e-05	90	16	Ccl3,Myo1f,Cd74,Csf1r,Adam8,Ccr1,Tlr2,Fgr,Coro1a,Pycard,Trf,Camk1d,Lyn,Ccr2,Tmsb4x,Syne2	positive regulation of cell motility	0.00115579
GO:0043303	14.521	3.83431e-05	13	6	Adora2b,Fgr,Milr1,Lyn,Fes,Fcer1g	mast cell degranulation	0.00120979
GO:0050727	3.68995	4.07475e-05	91	16	Ccl3,Il17ra,Apoe,Tnfaip8l2,Fcgr1,Adora2b,Tnip1,C3,Adam8,Tnfrsf1a,Psma1,Lyn,Ccr2,Fcer1g,Fcgr3,Gpx1	regulation of inflammatory response	0.0012428
GO:0009306	4.02111	5.36254e-05	74	14	Ccl3,Srgn,Plek,Clec4n,Traf6,Notch2,Tlr2,Fgr,Clec5a,Clec4e,Pycard,Gnptab,Lyn,S100a13	protein secretion	0.00158281
GO:0050707	6.39938	6.1216e-05	33	9	Ccl3,Srgn,Clec4n,Tlr2,Fgr,Clec5a,Clec4e,Pycard,Lyn	regulation of cytokine secretion	0.00162612
GO:0050766	7.56938	6.13264e-05	26	8	Fcgr1,C3,Slc11a1,Pycard,Sirpa,Camk1d,Fcer1g,Fcgr3	positive regulation of phagocytosis	0.00162612
GO:0040017	3.54625	6.14657e-05	94	16	Ccl3,Myo1f,Cd74,Csf1r,Adam8,Ccr1,Tlr2,Fgr,Coro1a,Pycard,Trf,Camk1d,Lyn,Ccr2,Tmsb4x,Syne2	positive regulation of locomotion	0.00162612
GO:0019886	12.7121	6.39241e-05	14	6	Cd74,Traf6,Ifi30,Unc93b1,H2-DMa,Fcer1g	antigen processing and presentation of exogenous peptide antigen via MHC class II	0.00162612
GO:0002699	4.21855	6.39785e-05	66	13	Fcgr1,Adora2b,C3,Cd74,Tlr2,Fgr,Lyn,Ccr2,Fes,Fcer1g,Fcgr3,B2m,H2-D1	positive regulation of immune effector process	0.00162612
GO:0030335	3.64506	7.80852e-05	86	15	Ccl3,Myo1f,Cd74,Csf1r,Adam8,Ccr1,Tlr2,Fgr,Coro1a,Pycard,Camk1d,Lyn,Ccr2,Tmsb4x,Syne2	positive regulation of cell migration	0.00193103
GO:0030595	4.8317	8.18857e-05	50	11	Itgb2,Ccl3,Cd74,Adam8,Ccr1,Coro1a,Itgam,Camk1d,Ccr2,Fcer1g,Fcgr3	leukocyte chemotaxis	0.00197172
GO:0060326	4.38166	8.82499e-05	59	12	Itgb2,Ccl3,Cd74,Adam8,Ccr1,Coro1a,Itgam,Camk1d,Ccr2,Fcer1g,Fcgr3,Rhog	cell chemotaxis	0.00207048
GO:0002474	16.8942	0.000112008	10	5	Fcgr1,Ifi30,Fcer1g,Fcgr3,H2-D1	antigen processing and presentation of peptide antigen via MHC class I	0.00249969
GO:0002675	16.8942	0.000112008	10	5	Fcgr1,C3,Adam8,Fcer1g,Fcgr3	positive regulation of acute inflammatory response	0.00249969
GO:0001909	5.68561	0.000128503	36	9	Ptpn6,Fcgr1,Ncf1,Prdx1,Ctsc,Rab27a,Fcgr3,B2m,H2-D1	leukocyte mediated cytotoxicity	0.00279954
GO:0002437	7.42682	0.000194093	23	7	Fcgr1,C3,Notch2,Psma1,Fcer1g,Fcgr3,Gpx1	inflammatory response to antigenic stimulus	0.00407317
GO:0043304	14.0779	0.000195868	11	5	Adora2b,Fgr,Lyn,Fes,Fcer1g	regulation of mast cell degranulation	0.00407317
GO:0042742	4.18315	0.000240527	56	11	Fcgr1,Ncf1,Prkcd,Myo1f,Slc11a1,Tlr2,Fgr,Tnfrsf1a,Tirap,Fcer1g,Lyz2	defense response to bacterium	0.00489071
GO:0006887	3.22969	0.000248639	95	15	Ccl3,Stxbp2,Rala,Adora2b,Plek,Myo1f,B4galt1,Fgr,Rest,Rab27a,Milr1,Lyn,Ccr2,Fes,Fcer1g	exocytosis	0.00494575
GO:0001817	2.45703	0.000307702	186	23	Ccl3,Il17ra,Hspb1,Mapkapk2,Adora2b,Srgn,Clec4n,Cd74,Adam8,Slc11a1,Traf6,Tlr2,Fgr,Clec5a,Clec4e,Iqgap1,Pycard,Tirap,Lyn,Ccr2,Cebpb,Fcer1g,Fcgr3	regulation of cytokine production	0.00599037
GO:0045123	12.0667	0.000320293	12	5	Itgb2,Adam8,Itgam,Selplg,Ccr2	cellular extravasation	0.00610559
GO:0019724	4.37847	0.000332617	49	10	Ptpn6,Rnf168,Fcgr1,Prkcd,C3,Cd74,H2-DMa,Fcer1g,Pirb,Fcgr3	B cell mediated immunity	0.00621111
GO:0050715	6.60098	0.000344976	25	7	Ccl3,Clec4n,Tlr2,Fgr,Clec5a,Clec4e,Pycard	positive regulation of cytokine secretion	0.00631306
GO:0050708	4.26829	0.0003953	50	10	Ccl3,Srgn,Clec4n,Traf6,Tlr2,Fgr,Clec5a,Clec4e,Pycard,Lyn	regulation of protein secretion	0.00709214
GO:0050778	2.62736	0.000444308	152	20	Ptpn6,Fcgr1,Mapkapk2,Tnip1,C3,Cd74,Adam8,Slc11a1,Tlr2,Pycard,Unc93b1,H2-DMa,Lat2,Lyn,Ccr2,Nfam1,Fcer1g,Fcgr3,B2m,H2-D1	positive regulation of immune response	0.00781811
GO:0002526	5.93921	0.000577777	27	7	Fcgr1,C3,Adam8,B4galt1,Nupr1,Fcer1g,Fcgr3	acute inflammatory response	0.00997483
GO:0002821	4.8572	0.000722541	36	8	Fcgr1,C3,Slc11a1,Ccr2,Fcer1g,Fcgr3,B2m,H2-D1	positive regulation of adaptive immune response	0.0120394
GO:0019915	5.65549	0.000733559	28	7	Gm2a,Dgat1,C3,Ehd1,Hexa,Plin2,Abhd5	lipid storage	0.0120394
GO:0002690	9.38408	0.000736838	14	5	Ccl3,Cd74,Ccr1,Camk1d,Ccr2	positive regulation of leukocyte chemotaxis	0.0120394
GO:0002573	3.13863	0.000778109	84	13	Ccl3,Spi1,Id2,Myh9,Csf1r,Adam8,Traf6,Itgam,Trf,Rara,Lyn,Cd300lf,Pirb	myeloid leukocyte differentiation	0.0124907
GO:0042060	2.96691	0.000816198	95	14	Cnn2,Cd44,Plek,Map3k1,Prkcd,Slc11a1,B4galt1,Macf1,Rab27a,Anxa2,F13a1,Lyn,Fcer1g,Gpx1	wound healing	0.0128762
GO:0006897	2.50723	0.000867128	150	19	Cnn2,Fcgr1,Mapkapk2,App,C3,Ehd1,Slc11a1,Ptpn1,Wasf2,Fgr,Coro1a,Pycard,Sirpa,Camk1d,Lrp1,Ccr2,Fcer1g,Fcgr3,Mapk3	endocytosis	0.0134478
GO:0030593	5.39673	0.000920798	29	7	Itgb2,Ccl3,Cd74,Itgam,Camk1d,Fcer1g,Fcgr3	neutrophil chemotaxis	0.0140422
GO:0030100	3.4163	0.00104459	66	11	Cnn2,Fcgr1,C3,Slc11a1,Ptpn1,Fgr,Pycard,Sirpa,Camk1d,Fcer1g,Fcgr3	regulation of endocytosis	0.0156689
GO:0016064	4.03238	0.00107189	47	9	Ptpn6,Rnf168,Fcgr1,Prkcd,C3,Cd74,H2-DMa,Fcer1g,Fcgr3	immunoglobulin mediated immune response	0.0158191
GO:0017157	3.9284	0.00125499	48	9	Rala,Adora2b,B4galt1,Fgr,Rest,Lyn,Ccr2,Fes,Fcer1g	regulation of exocytosis	0.0181044
GO:0032680	4.38493	0.00126632	39	8	Ccl3,Hspb1,Mapkapk2,Tlr2,Tirap,Ccr2,Fcer1g,Fcgr3	regulation of tumor necrosis factor production	0.0181044
GO:0002438	11.2292	0.00161	10	4	Fcgr1,C3,Fcer1g,Fcgr3	acute inflammatory response to antigenic stimulus	0.021664
GO:0006739	11.2292	0.00161	10	4	Ncf1,Ncf2,Pgd,G6pdx	NADP metabolic process	0.021664
GO:0032722	11.2292	0.00161	10	4	Adora2b,Cd74,Tlr2,Pycard	positive regulation of chemokine production	0.021664
GO:2000401	11.2292	0.00161	10	4	Ccl3,Adam8,Pycard,Ccr2	regulation of lymphocyte migration	0.021664
GO:0030099	2.35268	0.00166502	167	20	Ccl3,Spi1,Id2,Myh9,Csf1r,Adam8,Ccr1,Traf6,Itgam,G6pdx,Tirap,Trf,Rara,Tet2,Lyn,Cd300lf,Klf13,Fes,Klf2,Pirb	myeloid cell differentiation	0.0220796
GO:0050714	4.74808	0.00171511	32	7	Ccl3,Clec4n,Tlr2,Fgr,Clec5a,Clec4e,Pycard	positive regulation of protein secretion	0.0221031
GO:0071621	4.74808	0.00171511	32	7	Itgb2,Ccl3,Cd74,Itgam,Camk1d,Fcer1g,Fcgr3	granulocyte chemotaxis	0.0221031
GO:0007015	2.69598	0.00182353	103	14	Eps8,Hsp90b1,Map3k1,Prkcd,Lcp1,Enah,Diap1,Coro1a,Pycard,Flna,Trf,Diap2,Sirpa,Ezr	actin filament organization	0.023174
GO:0045807	3.99619	0.00209481	42	8	Fcgr1,C3,Slc11a1,Pycard,Sirpa,Camk1d,Fcer1g,Fcgr3	positive regulation of endocytosis	0.0262569
GO:0045088	3.07689	0.00217003	72	11	Mapkapk2,Tnip1,Myo1f,Cd74,Adam8,Ccr1,Tlr2,Fgr,Pycard,Unc93b1,Lyn	regulation of innate immune response	0.0267766
GO:0002237	2.63585	0.0021948	105	14	Ccl3,Mapkapk2,Slc11a1,Traf6,Tlr2,Tirap,Rara,Lyn,Ptgir,Wfdc21,Cebpb,Irak2,B2m,Mapk3	response to molecule of bacterial origin	0.0267766
GO:0072593	3.32613	0.00335734	55	9	Cybb,Ncf1,Prkcd,Prdx5,Ncf2,Prdx1,Birc3,Gpx1,Bnip3	reactive oxygen species metabolic process	0.039164
GO:0001819	2.73193	0.00335853	87	12	Ccl3,Il17ra,Hspb1,Adora2b,Cd74,Adam8,Slc11a1,Tlr2,Pycard,Tirap,Ccr2,Fcer1g	positive regulation of cytokine production	0.039164
GO:0030193	6.02847	0.00338561	19	5	Plek,Prkcd,Anxa2,Lyn,Fcer1g	regulation of blood coagulation	0.039164
GO:0042311	6.02847	0.00338561	19	5	Apoe,Plod3,Adora2b,G6pdx,Gpx1	vasodilation	0.039164
GO:0001773	8.42164	0.00346698	12	4	Spi1,Traf6,Pycard,Pirb	myeloid dendritic cell activation	0.039164
GO:0042743	8.42164	0.00346698	12	4	Cybb,Ncf1,Prdx5,Gpx1	hydrogen peroxide metabolic process	0.039164
GO:0051046	2.26123	0.00380406	155	18	Ccl3,Rala,Adora2b,Srgn,Glud1,Clec4n,Traf6,Tlr2,B4galt1,Fgr,Rest,Clec5a,Clec4e,Pycard,Lyn,Ccr2,Fes,Fcer1g	regulation of secretion	0.0424478
GO:0031532	4.61207	0.00408886	28	6	Eps8,Myh9,Csf1r,Ptpn1,Flna,Fes	actin cytoskeleton reorganization	0.045076
GO:0010543	7.48578	0.00478718	13	4	Plek,Prkcd,Lyn,Fcer1g	regulation of platelet activation	0.0499419
GO:0051702	7.48578	0.00478718	13	4	Ccl3,Ncf1,Rest,Gpx1	interaction with symbiont	0.0499419
GO:0072676	7.48578	0.00478718	13	4	Ccl3,Adam8,Pycard,Ccr2	lymphocyte migration	0.0499419
GO:0097028	7.48578	0.00478718	13	4	Spi1,Traf6,Lyn,Pirb	dendritic cell differentiation	0.0499419
GO:0032675	3.82432	0.00480316	38	7	Mapkapk2,Adora2b,Traf6,Tlr2,Pycard,Cebpb,Fcer1g	regulation of interleukin-6 production	0.0499419
GO:0070201	2.33575	0.00500128	125	15	Ccl3,Srgn,Cdkn1a,Clec4n,Traf6,Tlr2,Prdx1,Fgr,Clec5a,Clec4e,Pycard,Flna,Lyn,Sfn,Rhog	regulation of establishment of protein localization	0.0514176
GO:0034097	2.24623	0.00536968	147	17	Klf6,Ptpn6,Bcl2l1,Cd74,Csf1r,Ifitm1,Ifitm3,Slc11a1,Traf6,Mkks,Il6ra,Tnfrsf1a,Coro1a,Mcl1,Ccr2,Wfdc21,Pirb	response to cytokine stimulus	0.0541046
GO:0051223	2.44444	0.0053898	112	14	Ccl3,Srgn,Cdkn1a,Clec4n,Traf6,Tlr2,Prdx1,Fgr,Clec5a,Clec4e,Pycard,Flna,Lyn,Sfn	regulation of protein transport	0.0541046
GO:0051222	3.05783	0.00544003	59	9	Ccl3,Clec4n,Tlr2,Fgr,Clec5a,Clec4e,Pycard,Flna,Sfn	positive regulation of protein transport	0.0541046
GO:0050830	4.22642	0.0058582	30	6	Ncf1,Myo1f,Tlr2,Fgr,Tirap,Lyz2	defense response to Gram-positive bacterium	0.0576371
GO:0006911	6.7347	0.00640732	14	4	Fcgr1,Sirpa,Fcer1g,Fcgr3	phagocytosis, engulfment	0.0620296
GO:0071229	3.59166	0.00644023	40	7	Cdh1,Bcl2l1,Anxa2,S100a10,Lamtor4,Cebpb,Rraga	cellular response to acid	0.0620296
GO:0051050	2.001	0.00662321	192	20	Ccl3,Fcgr1,Adora2b,Trpv2,Glud1,Clec4n,C3,Slc11a1,Tlr2,Fgr,Clec5a,Clec4e,Pycard,Flna,Sirpa,Camk1d,Lrp1,Sfn,Fcer1g,Fcgr3	positive regulation of transport	0.0631275
GO:0031663	4.68597	0.00813258	23	5	Ccl3,Traf6,Lyn,Irak2,Mapk3	lipopolysaccharide-mediated signaling pathway	0.0749385
GO:0050921	4.68597	0.00813258	23	5	Ccl3,Cd74,Ccr1,Camk1d,Ccr2	positive regulation of chemotaxis	0.0749385
GO:0001101	2.65591	0.00829178	74	10	Cdh1,Klf4,Bcl2l1,Anxa2,Rara,S100a10,Asxl1,Lamtor4,Cebpb,Rraga	response to acid	0.0749385
GO:0009620	6.12194	0.0083538	15	4	Ncf1,Clec4n,Tlr2,Cotl1	response to fungus	0.0749385
GO:0010324	6.12194	0.0083538	15	4	Fcgr1,Sirpa,Fcer1g,Fcgr3	membrane invagination	0.0749385
GO:0032760	6.12194	0.0083538	15	4	Ccl3,Tlr2,Tirap,Fcer1g	positive regulation of tumor necrosis factor production	0.0749385
GO:0002218	3.38522	0.00846028	42	7	Mapkapk2,Tnip1,Adam8,Tlr2,Pycard,Unc93b1,Lyn	activation of innate immune response	0.0751568
GO:0006749	4.43866	0.00980721	24	5	Mgst1,Idh1,G6pdx,Gsr,Alox5ap	glutathione metabolic process	0.0854628
GO:0061041	4.43866	0.00980721	24	5	Plek,Prkcd,Anxa2,Lyn,Fcer1g	regulation of wound healing	0.0854628
GO:0002819	2.72736	0.0102851	65	9	Ptpn6,Fcgr1,C3,Slc11a1,Ccr2,Fcer1g,Fcgr3,B2m,H2-D1	regulation of adaptive immune response	0.0887813
GO:0002532	5.61101	0.0106506	16	4	Il17ra,Alox5,Fcer1g,Alox5ap	production of molecular mediator involved in inflammatory response	0.0902339
GO:0033032	5.61101	0.0106506	16	4	Anxa1,Adam17,Fcer1g,Ccr5	regulation of myeloid cell apoptotic process	0.0902339
GO:0051047	2.53569	0.0109044	77	10	Ccl3,Adora2b,Glud1,Clec4n,Tlr2,Fgr,Clec5a,Clec4e,Pycard,Fcer1g	positive regulation of secretion	0.0915366
GO:0071219	2.88396	0.011416	55	8	Ccl3,Traf6,Tlr2,Tirap,Rara,Lyn,Irak2,Mapk3	cellular response to molecule of bacterial origin	0.0949601
GO:0071230	4.21613	0.0117044	25	5	Cdh1,Bcl2l1,Lamtor4,Cebpb,Rraga	cellular response to amino acid stimulus	0.0964818
GO:0002764	2.37764	0.011969	98	12	Ptpn6,Fcgr1,Mapkapk2,Tnip1,Adam8,Tlr2,Unc93b1,Lat2,Lyn,Nfam1,Fcer1g,Fcgr3	immune response-regulating signaling pathway	0.0977826
GO:0051258	2.63212	0.0124645	67	9	Ube2c,Nin,Map3k1,Prkcd,Diap1,Coro1a,Pycard,Diap2,Fes	protein polymerization	0.100929
GO:0045765	2.82337	0.0126842	56	8	Aggf1,C3,Sema4a,Btg1,Thbs1,Id1,Pik3r6,Ccr2	regulation of angiogenesis	0.101808
GO:0033028	5.17853	0.0133189	17	4	Anxa1,Adam17,Fcer1g,Ccr5	myeloid cell apoptotic process	0.105059
GO:0048525	5.17853	0.0133189	17	4	Ccl3,Ifitm1,Ifitm3,Rest	negative regulation of viral reproduction	0.105059
GO:0048520	4.01487	0.0138365	26	5	Ccl3,Cd74,Ccr1,Camk1d,Ccr2	positive regulation of behavior	0.107641
GO:0032880	2.00796	0.0138816	162	17	Cdh1,Ccl3,Srgn,Cdkn1a,Clec4n,Rab14,Traf6,Tlr2,Prdx1,Fgr,Clec5a,Clec4e,Pycard,Flna,Lyn,Sfn,Rhog	regulation of protein localization	0.107641
GO:0045089	2.76525	0.0140529	57	8	Mapkapk2,Tnip1,Cd74,Adam8,Tlr2,Pycard,Unc93b1,Lyn	positive regulation of innate immune response	0.108054
GO:0000768	7.19595	0.0159989	10	3	Myh9,Adam8,Capn2	syncytium formation by plasma membrane fusion	0.117699
GO:0006910	7.19595	0.0159989	10	3	Fcgr1,Sirpa,Fcgr3	phagocytosis, recognition	0.117699
GO:0032731	7.19595	0.0159989	10	3	Ccl3,Hspb1,Pycard	positive regulation of interleukin-1 beta production	0.117699
GO:0042119	7.19595	0.0159989	10	3	Myo1f,Tyrobp,Fcer1g	neutrophil activation	0.117699
GO:0045730	7.19595	0.0159989	10	3	Ncf1,Slc11a1,Camk1d	respiratory burst	0.117699
GO:0002253	2.21986	0.0160791	104	12	Ptpn6,Mapkapk2,Tnip1,C3,Adam8,Tlr2,Pycard,Unc93b1,Lat2,Lyn,Nfam1,Fcer1g	activation of immune response	0.117699
GO:0030316	3.26805	0.0164575	37	6	Ccl3,Csf1r,Adam8,Traf6,Trf,Cd300lf	osteoclast differentiation	0.119513
GO:0032496	2.33796	0.0178417	91	11	Ccl3,Mapkapk2,Slc11a1,Traf6,Rara,Lyn,Ptgir,Wfdc21,Cebpb,Irak2,Mapk3	response to lipopolysaccharide	0.128545
GO:0008203	3.16537	0.0186427	38	6	Apoe,App,Soat1,Aplp2,Lrp1,Apoc1	cholesterol metabolic process	0.133266
GO:0001913	4.48687	0.019842	19	4	Ctsc,Rab27a,B2m,H2-D1	T cell mediated cytotoxicity	0.14074
GO:0033993	1.93857	0.0208046	157	16	Ccl3,Klf4,Mapkapk2,Ctsl,Slc11a1,Traf6,Rest,Rara,Lyn,Asxl1,Ptgir,Wfdc21,Cebpb,Irak2,Mapk3,Akap13	response to lipid	0.144022
GO:0009615	2.38297	0.021069	73	9	Bcl2l1,Bnip3l,Ifitm1,Ifitm3,Lcn2,Irf5,Pycard,Bnip3,Ifi27l2a	response to virus	0.144022
GO:0006949	6.29667	0.0210917	11	3	Myh9,Adam8,Capn2	syncytium formation	0.144022
GO:0032732	6.29667	0.0210917	11	3	Ccl3,Hspb1,Pycard	positive regulation of interleukin-1 production	0.144022
GO:0042554	6.29667	0.0210917	11	3	Ncf1,Prkcd,Ncf2	superoxide anion generation	0.144022
GO:0002768	2.5069	0.022548	62	8	Ptpn6,Fcgr1,Tlr2,Lat2,Lyn,Nfam1,Fcer1g,Fcgr3	immune response-regulating cell surface receptor signaling pathway	0.152825
GO:0016125	2.97813	0.0235909	40	6	Apoe,App,Soat1,Aplp2,Lrp1,Apoc1	sterol metabolic process	0.15731
GO:0032615	4.20589	0.0237254	20	4	Prkcd,Traf6,Tlr2,G6pdx	interleukin-12 production	0.15731
GO:0050853	4.20589	0.0237254	20	4	Ptpn6,Lat2,Lyn,Nfam1	B cell receptor signaling pathway	0.15731
GO:0032970	2.35754	0.0247118	82	10	Cnn2,Map3k1,Prkcd,Myo1f,Csf1r,Fgr,Coro1a,Pycard,Lrp1,Fes	regulation of actin filament-based process	0.162671
GO:0007596	2.62815	0.0259457	52	7	Plek,Prkcd,Rab27a,Anxa2,F13a1,Lyn,Fcer1g	blood coagulation	0.169573
GO:0019221	2.29286	0.0266063	84	10	Klf6,Ptpn6,Cd74,Ifitm3,Traf6,Mkks,Il6ra,Tnfrsf1a,Ccr2,Pirb	cytokine-mediated signaling pathway	0.170169
GO:0001885	5.59638	0.0269666	12	3	Plod3,Id1,Gpx1	endothelial cell development	0.170169
GO:0030225	5.59638	0.0269666	12	3	Spi1,Id2,Itgam	macrophage differentiation	0.170169
GO:0051384	5.59638	0.0269666	12	3	Ctsl,Rest,Akap13	response to glucocorticoid stimulus	0.170169
GO:0070527	5.59638	0.0269666	12	3	Plek,Prkcd,Lyn	platelet aggregation	0.170169
GO:0002367	3.95809	0.0280379	21	4	Cd74,Slc11a1,Tlr2,Fcer1g	cytokine production involved in immune response	0.171031
GO:0030048	3.95809	0.0280379	21	4	Myh9,Wasf2,Syne2,Myl6	actin filament-based movement	0.171031
GO:0032642	3.95809	0.0280379	21	4	Adora2b,Cd74,Tlr2,Pycard	regulation of chemokine production	0.171031
GO:0032755	3.95809	0.0280379	21	4	Adora2b,Tlr2,Pycard,Fcer1g	positive regulation of interleukin-6 production	0.171031
GO:0033619	3.95809	0.0280379	21	4	Napsa,Myh9,Adam8,Adam17	membrane protein proteolysis	0.171031
GO:0042108	3.23981	0.0283971	31	5	Hspb1,Traf6,Tlr2,Ccr2,Fcgr3	positive regulation of cytokine biosynthetic process	0.171559
GO:0007599	2.5706	0.0284995	53	7	Plek,Prkcd,Rab27a,Anxa2,F13a1,Lyn,Fcer1g	hemostasis	0.171559
GO:0030041	2.81168	0.0293509	42	6	Map3k1,Prkcd,Diap1,Coro1a,Pycard,Diap2	actin filament polymerization	0.17553
GO:0001776	2.51547	0.0312184	54	7	Cd74,Anxa1,Coro1a,Lyn,Adam17,Fcer1g,Pirb	leukocyte homeostasis	0.184289
GO:0070371	2.51547	0.0312184	54	7	Ccl3,Ptpn6,Cd74,Csf1r,Pycard,Trf,Lyn	ERK1 and ERK2 cascade	0.184289
GO:0002262	2.17365	0.0317033	88	10	Spi1,Id2,Anxa1,Prdx1,G6pdx,Lyn,Klf13,Adam17,Klf2,Fcer1g	myeloid cell homeostasis	0.185952
GO:0002456	3.11928	0.0321504	32	5	Slc11a1,Ctsc,Rab27a,B2m,H2-D1	T cell mediated immunity	0.186188
GO:0043200	3.11928	0.0321504	32	5	Cdh1,Bcl2l1,Lamtor4,Cebpb,Rraga	response to amino acid stimulus	0.186188
GO:0042088	3.73709	0.0327869	22	4	Slc11a1,Traf6,Sema4a,Ccr2	T-helper 1 type immune response	0.1875
GO:0045446	3.73709	0.0327869	22	4	Plod3,Btg1,Id1,Gpx1	endothelial cell differentiation	0.1875
GO:0006917	2.14561	0.0332564	89	10	Spi1,Bnip3l,Itm2b,Shisa5,Casp6,Pycard,Cebpb,Gpx1,Sp110,Bnip3	induction of apoptosis	0.188728
GO:0042267	5.03609	0.0336205	13	3	Ptpn6,Prdx1,Rab27a	natural killer cell mediated cytotoxicity	0.188728
GO:0045124	5.03609	0.0336205	13	3	Csf1r,Adam8,Trf	regulation of bone resorption	0.188728
GO:0008154	2.46263	0.0341063	55	7	Map3k1,Prkcd,Enah,Diap1,Coro1a,Pycard,Diap2	actin polymerization or depolymerization	0.190288
GO:0032956	2.3458	0.035872	74	9	Map3k1,Prkcd,Myo1f,Csf1r,Fgr,Coro1a,Pycard,Lrp1,Fes	regulation of actin cytoskeleton organization	0.195992
GO:0000910	2.66259	0.0359656	44	6	Rala,Actr2,Myh9,Son,Actr3,Plk1	cytokinesis	0.195992
GO:0051607	2.66259	0.0359656	44	6	Bnip3l,Ifitm1,Ifitm3,Irf5,Pycard,Bnip3	defense response to virus	0.195992
GO:0002224	3.00736	0.0361996	33	5	Mapkapk2,Tnip1,Tlr2,Unc93b1,Lyn	toll-like receptor signaling pathway	0.195992
GO:0050920	3.00736	0.0361996	33	5	Ccl3,Cd74,Ccr1,Camk1d,Ccr2	regulation of chemotaxis	0.195992
GO:0006801	3.53999	0.0379773	23	4	Ncf1,Prkcd,Ncf2,Prdx1	superoxide metabolic process	0.203212
GO:0007229	3.53999	0.0379773	23	4	Itgb2,Fgr,Tyrobp,Fcer1g	integrin-mediated signaling pathway	0.203212
GO:0006636	4.57768	0.0410423	14	3	Cd74,Alox5,Alox5ap	unsaturated fatty acid biosynthetic process	0.214358
GO:0032613	4.57768	0.0410423	14	3	Prkcd,G6pdx,Fcer1g	interleukin-10 production	0.214358
GO:0046456	4.57768	0.0410423	14	3	Cd74,Alox5,Alox5ap	icosanoid biosynthetic process	0.214358
GO:0050701	4.57768	0.0410423	14	3	Ccl3,Pycard,S100a13	interleukin-1 secretion	0.214358
GO:0006935	1.77048	0.0412316	170	16	Itgb2,Ccl3,Lsp1,App,Enah,Cd74,Adam8,Ccr1,Coro1a,Itgam,Camk1d,Ccr2,B3gnt2,Fcer1g,Fcgr3,Rhog	chemotaxis	0.214358
GO:0042035	2.52868	0.0434688	46	6	Hspb1,Traf6,Tlr2,Ccr2,Cebpb,Fcgr3	regulation of cytokine biosynthetic process	0.22293
GO:0003158	3.36243	0.0436113	24	4	Plod3,Btg1,Id1,Gpx1	endothelium development	0.22293
GO:0045453	3.36243	0.0436113	24	4	Csf1r,Adam8,Traf6,Trf	bone resorption	0.22293
GO:0006641	2.80589	0.0452024	35	5	Dgat1,C3,Abhd5,Apoc1,Gpx1	triglyceride metabolic process	0.228509
GO:0043506	2.80589	0.0452024	35	5	Map3k1,Zeb2,Tirap,Trf,Aida	regulation of JUN kinase activity	0.228509
GO:0022604	1.78923	0.0463631	147	14	Ccl3,Trpv2,Myh9,Myl12a,Diap1,Csf1r,Sema4a,Pdlim5,Fgr,Coro1a,Myl12b,Plxnb2,Fes,Fmnl1	regulation of cell morphogenesis	0.233089
GO:0070372	2.46657	0.0475618	47	6	Ccl3,Ptpn6,Cd74,Csf1r,Pycard,Lyn	regulation of ERK1 and ERK2 cascade	0.237809
GO:0007257	4.19573	0.0492144	15	3	Map3k1,Tirap,Trf	activation of JUN kinase activity	0.240808
GO:0032651	4.19573	0.0492144	15	3	Ccl3,Hspb1,Pycard	regulation of interleukin-1 beta production	0.240808
GO:0035335	4.19573	0.0492144	15	3	Ptpn6,Ptpn1,Ptpre	peptidyl-tyrosine dephosphorylation	0.240808
GO:0043534	4.19573	0.0492144	15	3	Myh9,Itgb1,Gpx1	blood vessel endothelial cell migration	0.240808
GO:0001525	1.81137	0.049868	156	15	Aggf1,Myh9,C3,Adam8,Itgb1,Sema4a,B4galt1,Wasf2,Anxa2,Btg1,Thbs1,Id1,Pik3r6,Ccr2,Gpx1	angiogenesis	0.242709
GO:0050777	2.71507	0.0501615	36	5	Ptpn6,Ccr1,Psma1,Ccr2,Gpx1	negative regulation of immune response	0.242846
GO:0045766	3.05574	0.0562075	26	4	Aggf1,C3,Btg1,Pik3r6	positive regulation of angiogenesis	0.270683
GO:0051347	1.71153	0.0579264	164	15	Map3k1,Csf1r,Adam8,Slc11a1,Zeb2,Cdc25b,Tpx2,Iqgap1,Plk1,Tirap,Trf,Lyn,Pik3r6,Npm1,Ceacam1	positive regulation of transferase activity	0.272687
GO:0006378	3.87275	0.0581137	16	3	Pabpn1,App,Gm20521	mRNA polyadenylation	0.272687
GO:0010883	3.87275	0.0581137	16	3	C3,Ehd1,Abhd5	regulation of lipid storage	0.272687
GO:0046850	3.87275	0.0581137	16	3	Csf1r,Adam8,Trf	regulation of bone remodeling	0.272687
GO:2000108	3.87275	0.0581137	16	3	Anxa1,Adam8,Lyn	positive regulation of leukocyte apoptotic process	0.272687
GO:0045860	1.77927	0.0591724	137	13	Map3k1,Csf1r,Adam8,Slc11a1,Zeb2,Cdc25b,Tpx2,Iqgap1,Tirap,Trf,Pik3r6,Npm1,Ceacam1	positive regulation of protein kinase activity	0.276238
GO:0008037	2.54943	0.0610013	38	5	Fcgr1,App,B4galt1,Sirpa,Fcgr3	cell recognition	0.282965
GO:0071222	2.29715	0.0612317	50	6	Ccl3,Traf6,Rara,Lyn,Irak2,Mapk3	cellular response to lipopolysaccharide	0.282965
GO:0043507	2.92238	0.0631627	27	4	Map3k1,Zeb2,Tirap,Trf	positive regulation of JUN kinase activity	0.290421
GO:0035150	2.47402	0.0668811	39	5	Apoe,Plod3,Adora2b,G6pdx,Gpx1	regulation of tube size	0.302952
GO:0050880	2.47402	0.0668811	39	5	Apoe,Plod3,Adora2b,G6pdx,Gpx1	regulation of blood vessel size	0.302952
GO:0051651	2.47402	0.0668811	39	5	Jup,Apoe,Srgn,Nin,Flna	maintenance of location in cell	0.302952
GO:0006509	3.59514	0.0677126	17	3	Myh9,Adam8,Adam17	membrane protein ectodomain proteolysis	0.303711
GO:0045921	3.59514	0.0677126	17	3	Adora2b,Fgr,Fcer1g	positive regulation of exocytosis	0.303711
GO:0033674	1.76205	0.0683827	149	14	Map3k1,Csf1r,Adam8,Slc11a1,Zeb2,Cdc25b,Tpx2,Iqgap1,Tirap,Trf,Lyn,Pik3r6,Npm1,Ceacam1	positive regulation of kinase activity	0.30522
GO:0008202	2.04657	0.0693756	74	8	Apoe,Sgpl1,App,Soat1,Rest,Aplp2,Lrp1,Apoc1	steroid metabolic process	0.308149
GO:0002286	2.80014	0.0705479	28	4	Slc11a1,Sema4a,Rab27a,Ccr2	T cell activation involved in immune response	0.310343
GO:0070374	2.80014	0.0705479	28	4	Ccl3,Cd74,Csf1r,Pycard	positive regulation of ERK1 and ERK2 cascade	0.310343
GO:0007163	2.01565	0.0724049	75	8	Lims1,Actr2,Myh9,Actr3,Lmna,Macf1,Ezr,Syne2	establishment or maintenance of cell polarity	0.316988
GO:0043623	1.80018	0.073372	125	12	Ube2c,Nin,Map3k1,Prkcd,Diap1,Mkks,Cenpc1,Coro1a,Pycard,Diap2,Fes,Sdhaf1	cellular protein complex assembly	0.319692
GO:0051493	1.78408	0.0748683	126	12	Map3k1,Prkcd,Myo1f,Csf1r,Tpx2,Fgr,Coro1a,Pycard,Lrp1,Fes,Npm1,Mapk3	regulation of cytoskeleton organization	0.324666
GO:0032611	3.35493	0.0779796	18	3	Ccl3,Hspb1,Pycard	interleukin-1 beta production	0.333354
GO:0043631	3.35493	0.0779796	18	3	Pabpn1,App,Gm20521	RNA polyadenylation	0.333354
GO:0051653	3.35493	0.0779796	18	3	Actr2,Myh9,Actr3	spindle localization	0.333354
GO:0030168	2.68746	0.0783548	29	4	Plek,Prkcd,Lyn,Fcer1g	platelet activation	0.333354
GO:0045619	1.95651	0.0790577	77	8	Ptpn6,Id2,Cd74,Adam8,Zbtb7b,H2-DMa,Ccr2,Nfam1	regulation of lymphocyte differentiation	0.333354
GO:0050870	1.95651	0.0790577	77	8	Cd74,Adam8,Traf6,Coro1a,Pycard,H2-DMa,Ccr2,Lgals1	positive regulation of T cell activation	0.333354
GO:0006639	2.33582	0.0795514	41	5	Dgat1,C3,Abhd5,Apoc1,Gpx1	acylglycerol metabolic process	0.333897
GO:0001934	1.57938	0.08503	200	17	Map3k1,C3,Cd74,Csf1r,Adam8,Slc11a1,Fam129a,Zeb2,Cdc25b,Tpx2,Iqgap1,Tirap,Trf,Lyn,Pik3r6,Npm1,Ceacam1	positive regulation of protein phosphorylation	0.355262
GO:0015758	2.27224	0.0863353	42	5	Slc2a3,C3,Fabp5,Slc2a1,Sort1	glucose transport	0.358437
GO:0006457	2.5838	0.0865733	30	4	Ero1l,Cd74,H2-DMa,B2m	protein folding	0.358437
GO:0006638	2.21196	0.0934124	43	5	Dgat1,C3,Abhd5,Apoc1,Gpx1	neutral lipid metabolic process	0.383284
GO:0032388	2.21196	0.0934124	43	5	Adora2b,Fgr,Flna,Sfn,Fcer1g	positive regulation of intracellular transport	0.383284
GO:0006959	2.48771	0.095192	31	4	Ptpn6,C3,Notch2,Ccr2	humoral immune response	0.388842
GO:0006979	1.92502	0.0959358	88	9	Apoe,Ppp2cb,App,Prdx5,Idh1,Prdx1,Mtf1,G6pdx,Gpx1	response to oxidative stress	0.390139
GO:0048872	1.66888	0.0974182	145	13	Spi1,Id2,Cd74,Anxa1,Prdx1,Coro1a,G6pdx,Lyn,Klf13,Adam17,Klf2,Fcer1g,Pirb	homeostasis of number of cells	0.394414
GO:0042113	1.77287	0.0985428	116	11	Ptpn6,Rnf168,Id2,Prkcd,Cdkn1a,Pfdn1,Lat2,Lyn,Adam17,Nfam1,Lgals1	B cell activation	0.39721
GO:0007043	2.95929	0.100378	20	3	Cdh1,Jup,Cd9	cell-cell junction assembly	0.397603
GO:0032729	2.95929	0.100378	20	3	Slc11a1,Pycard,Ccr2	positive regulation of interferon-gamma production	0.397603
GO:0045577	2.95929	0.100378	20	3	Ptpn6,Id2,Nfam1	regulation of B cell differentiation	0.397603
GO:0050798	2.95929	0.100378	20	3	Itgb2,Itgam,Pycard	activated T cell proliferation	0.397603
GO:0046849	2.39831	0.104198	32	4	Csf1r,Adam8,Traf6,Trf	bone remodeling	0.407333
GO:0007176	4.18562	0.106396	10	2	App,Aplp2	regulation of epidermal growth factor-activated receptor activity	0.407333
GO:0030866	4.18562	0.106396	10	2	Tln1,Fmnl1	cortical actin cytoskeleton organization	0.407333
GO:0033198	4.18562	0.106396	10	2	Hsp90b1,Sell	response to ATP	0.407333
GO:0045777	4.18562	0.106396	10	2	Id2,G6pdx	positive regulation of blood pressure	0.407333
GO:0051084	4.18562	0.106396	10	2	Cd74,H2-DMa	'de novo' posttranslational protein folding	0.407333
GO:0060351	4.18562	0.106396	10	2	Rara,Thbs1	cartilage development involved in endochondral bone morphogenesis	0.407333
GO:0070301	4.18562	0.106396	10	2	Prdx5,Gpx1	cellular response to hydrogen peroxide	0.407333
GO:0032943	1.69068	0.108369	121	11	Itgb2,Ptpn6,Prkcd,Cdkn1a,Slc11a1,Traf6,Coro1a,Itgam,Pycard,Lyn,Ccr2	mononuclear cell proliferation	0.408263
GO:0046651	1.69068	0.108369	121	11	Itgb2,Ptpn6,Prkcd,Cdkn1a,Slc11a1,Traf6,Coro1a,Itgam,Pycard,Lyn,Ccr2	lymphocyte proliferation	0.408263
GO:0006518	2.10075	0.108424	45	5	Mgst1,Idh1,G6pdx,Gsr,Alox5ap	peptide metabolic process	0.408263
GO:0050795	2.10075	0.108424	45	5	Ccl3,Cd74,Ccr1,Camk1d,Ccr2	regulation of behavior	0.408263
GO:0071345	1.67512	0.11082	122	11	Klf6,Ptpn6,Cd74,Csf1r,Ifitm3,Traf6,Mkks,Il6ra,Tnfrsf1a,Ccr2,Pirb	cellular response to cytokine stimulus	0.414831
GO:0050730	1.90169	0.111127	69	7	Ptpn6,Prkcd,App,Cd74,Csf1r,Aplp2,Lyn	regulation of peptidyl-tyrosine phosphorylation	0.414831
GO:0001782	2.79443	0.112435	21	3	Cd74,Lyn,Pirb	B cell homeostasis	0.414831
GO:0042542	2.79443	0.112435	21	3	Ppp2cb,Prdx5,Gpx1	response to hydrogen peroxide	0.414831
GO:2000107	2.79443	0.112435	21	3	Cd74,Fcer1g,Ccr5	negative regulation of leukocyte apoptotic process	0.414831
GO:0032273	2.31538	0.113577	33	4	Map3k1,Coro1a,Pycard,Fes	positive regulation of protein polymerization	0.417361
GO:0001894	1.87119	0.115774	70	7	Csf1r,Adam8,Traf6,Mkks,Coro1a,Trf,Ankrd11	tissue homeostasis	0.423577
GO:0050863	1.64485	0.116194	124	11	Ptpn6,Tnfaip8l2,Cd74,Adam8,Traf6,Zbtb7b,Coro1a,Pycard,H2-DMa,Ccr2,Lgals1	regulation of T cell activation	0.423577
GO:0070661	1.63011	0.119113	125	11	Itgb2,Ptpn6,Prkcd,Cdkn1a,Slc11a1,Traf6,Coro1a,Itgam,Pycard,Lyn,Ccr2	leukocyte proliferation	0.42945
GO:0001667	1.72518	0.119843	97	9	Sgpl1,Myh9,Itgb1,Zeb2,Sema4a,Macf1,Wasf2,Syne2,Gpx1	ameboidal cell migration	0.42945
GO:0050878	1.72518	0.119843	97	9	Cdh1,Plek,Prkcd,Xdh,Rab27a,Anxa2,F13a1,Lyn,Fcer1g	regulation of body fluid levels	0.42945
GO:0007188	2.23764	0.123314	34	4	Adora2b,Flna,Gnai2,Ptgir	adenylate cyclase-modulating G-protein coupled receptor signaling pathway	0.42945
GO:0050885	2.23764	0.123314	34	4	Gm2a,App,Hexa,Aplp2	neuromuscular process controlling balance	0.42945
GO:0045646	2.64678	0.125011	22	3	Id2,Lyn,Klf13	regulation of erythrocyte differentiation	0.42945
GO:0006869	2.10406	0.125097	54	6	Apoe,Lrp10,Anxa1,Plin2,Abca7,Lrp1	lipid transport	0.42945
GO:0015909	3.71982	0.125353	11	2	Anxa1,Plin2	long-chain fatty acid transport	0.42945
GO:0019432	3.71982	0.125353	11	2	Dgat1,C3	triglyceride biosynthetic process	0.42945
GO:0034394	3.71982	0.125353	11	2	Cdh1,Flna	protein localization to cell surface	0.42945
GO:0043392	3.71982	0.125353	11	2	Id2,Id1	negative regulation of DNA binding	0.42945
GO:0043516	3.71982	0.125353	11	2	Cd74,Npm1	regulation of DNA damage response, signal transduction by p53 class mediator	0.42945
GO:0046627	3.71982	0.125353	11	2	Prkcd,Ptpre	negative regulation of insulin receptor signaling pathway	0.42945
GO:0050702	3.71982	0.125353	11	2	Ccl3,Pycard	interleukin-1 beta secretion	0.42945
GO:0071526	3.71982	0.125353	11	2	Sema4a,Plxnb2	semaphorin-plexin signaling pathway	0.42945
GO:0090207	3.71982	0.125353	11	2	C3,Abhd5	regulation of triglyceride metabolic process	0.42945
GO:0034101	1.81282	0.125784	72	7	Spi1,Id2,Prdx1,G6pdx,Lyn,Klf13,Klf2	erythrocyte homeostasis	0.42945
GO:0042089	2.06086	0.12863	55	6	Hspb1,Traf6,Tlr2,Ccr2,Cebpb,Fcgr3	cytokine biosynthetic process	0.435913
GO:0042107	2.06086	0.12863	55	6	Hspb1,Traf6,Tlr2,Ccr2,Cebpb,Fcgr3	cytokine metabolic process	0.435913
GO:0010954	2.16518	0.133393	35	4	Plgrkt,C3,Adam8,Plk1	positive regulation of protein processing	0.44769
GO:0021782	2.16518	0.133393	35	4	Ndrg1,Id2,Vim,Itgam	glial cell development	0.44769
GO:0010942	1.59748	0.133906	139	12	Ccl3,Bcl2l1,Cdkn1a,Anxa1,Adam8,Itm2c,Notch2,B4galt1,Rest,Nupr1,Lyn,Rraga	positive regulation of cell death	0.44769
GO:0071417	1.72355	0.134491	108	10	Cdh1,Bcl2l1,Hsp90b1,Prkcd,Ptpn1,Tlr2,Ptpre,Lamtor4,Cebpb,Rraga	cellular response to organic nitrogen	0.44769
GO:0051098	1.874	0.135041	80	8	Id2,App,Aplp2,Anxa2,S100a10,Id1,Aida,Mapk3	regulation of binding	0.44769
GO:0071396	1.874	0.135041	80	8	Ccl3,Traf6,Rest,Rara,Lyn,Irak2,Mapk3,Akap13	cellular response to lipid	0.44769
GO:0016525	2.51412	0.138066	23	3	Sema4a,Thbs1,Ccr2	negative regulation of angiogenesis	0.449839
GO:0048008	2.51412	0.138066	23	3	Sgpl1,Lrp1,Ptgir	platelet-derived growth factor receptor signaling pathway	0.449839
GO:0070534	2.51412	0.138066	23	3	Rnf168,Trip12,Traf6	protein K63-linked ubiquitination	0.449839
GO:0008344	1.94092	0.141381	58	6	Cstb,Eps8,App,Hexa,Ppt1,Atp1a3	adult locomotory behavior	0.449839
GO:0002683	1.6547	0.143428	112	10	Ptpn6,Tnfaip8l2,Id2,Cd74,Ccr1,Psma1,Milr1,Lyn,Ccr2,Gpx1	negative regulation of immune system process	0.449839
GO:0030833	2.09719	0.143797	36	4	Map3k1,Prkcd,Coro1a,Pycard	regulation of actin filament polymerization	0.449839
GO:0043542	2.09719	0.143797	36	4	Myh9,Itgb1,Sema4a,Gpx1	endothelial cell migration	0.449839
GO:0061024	1.49404	0.144334	185	15	Ndrg1,Fcgr1,Ncf1,Myl12a,Lmna,Macf1,Cd9,Flna,Sirpa,Fcer1g,Fcgr3,Flot1,Syne2,Rhog,Bnip3	membrane organization	0.449839
GO:0002446	3.34748	0.14503	12	2	Ncf1,Myo1f	neutrophil mediated immunity	0.449839
GO:0006693	3.34748	0.14503	12	2	Cd74,Tnfrsf1a	prostaglandin metabolic process	0.449839
GO:0014812	3.34748	0.14503	12	2	Lrp1,Tmsb4x	muscle cell migration	0.449839
GO:0017158	3.34748	0.14503	12	2	B4galt1,Rest	regulation of calcium ion-dependent exocytosis	0.449839
GO:0030865	3.34748	0.14503	12	2	Tln1,Fmnl1	cortical cytoskeleton organization	0.449839
GO:0043368	3.34748	0.14503	12	2	Cd74,H2-DMa	positive T cell selection	0.449839
GO:0045063	3.34748	0.14503	12	2	Sema4a,Ccr2	T-helper 1 cell differentiation	0.449839
GO:0048384	3.34748	0.14503	12	2	Rara,Asxl1	retinoic acid receptor signaling pathway	0.449839
GO:0048821	3.34748	0.14503	12	2	G6pdx,Klf2	erythrocyte development	0.449839
GO:0051180	3.34748	0.14503	12	2	Slc2a3,Slc2a1	vitamin transport	0.449839
GO:0071622	3.34748	0.14503	12	2	Cd74,Camk1d	regulation of granulocyte chemotaxis	0.449839
GO:0006612	2.39386	0.15156	24	3	Ncf1,Myl12a,Macf1	protein targeting to membrane	0.460721
GO:0007044	2.39386	0.15156	24	3	Plec,Tln1,Macf1	cell-substrate junction assembly	0.460721
GO:0009063	2.39386	0.15156	24	3	Ddah2,Tdh,Hdc	cellular amino acid catabolic process	0.460721
GO:0034109	2.39386	0.15156	24	3	Plek,Prkcd,Lyn	homotypic cell-cell adhesion	0.460721
GO:0034614	2.39386	0.15156	24	3	Prdx5,Prdx1,Gpx1	cellular response to reactive oxygen species	0.460721
GO:0050873	2.39386	0.15156	24	3	Ero1l,Cebpb,Bnip3	brown fat cell differentiation	0.460721
GO:0042692	1.54837	0.154483	155	13	Ifrd1,Sdc1,Myh9,Itgb1,Capn2,Lmna,Rest,Rara,Tmsb4x,Actg1,Gpx1,Lgals1,Sort1	muscle cell differentiation	0.463525
GO:0002761	2.03323	0.154508	37	4	Ccl3,Id2,Rara,Lyn	regulation of myeloid leukocyte differentiation	0.463525
GO:0042102	2.03323	0.154508	37	4	Traf6,Coro1a,Pycard,Ccr2	positive regulation of T cell proliferation	0.463525
GO:0050728	2.03323	0.154508	37	4	Apoe,Tnfaip8l2,Psma1,Gpx1	negative regulation of inflammatory response	0.463525
GO:0042098	1.70563	0.155767	87	8	Itgb2,Ptpn6,Slc11a1,Traf6,Coro1a,Itgam,Pycard,Ccr2	T cell proliferation	0.465775
GO:0032886	1.80091	0.16301	62	6	Diap1,Mkks,Tpx2,Macf1,Fes,Npm1	regulation of microtubule-based process	0.474736
GO:0001916	3.04273	0.165286	13	2	B2m,H2-D1	positive regulation of T cell mediated cytotoxicity	0.474736
GO:0006998	3.04273	0.165286	13	2	Lmna,Syne2	nuclear envelope organization	0.474736
GO:0009311	3.04273	0.165286	13	2	Gm2a,B4galt1	oligosaccharide metabolic process	0.474736
GO:0010761	3.04273	0.165286	13	2	Sgpl1,Syne2	fibroblast migration	0.474736
GO:0030819	3.04273	0.165286	13	2	Adora2b,Ptgir	positive regulation of cAMP biosynthetic process	0.474736
GO:0042531	3.04273	0.165286	13	2	Csf1r,Lyn	positive regulation of tyrosine phosphorylation of STAT protein	0.474736
GO:0045022	3.04273	0.165286	13	2	Flna,Mapk3	early endosome to late endosome transport	0.474736
GO:0045214	3.04273	0.165286	13	2	Itgb1,Actg1	sarcomere organization	0.474736
GO:0055012	3.04273	0.165286	13	2	Lmna,Rara	ventricular cardiac muscle cell differentiation	0.474736
GO:0030838	2.2848	0.165451	25	3	Map3k1,Coro1a,Pycard	positive regulation of actin filament polymerization	0.474736
GO:0045445	2.2848	0.165451	25	3	Sdc1,Rest,Lgals1	myoblast differentiation	0.474736
GO:0045582	1.97309	0.165509	38	4	Cd74,Adam8,H2-DMa,Ccr2	positive regulation of T cell differentiation	0.474736
GO:0048771	1.769	0.169172	63	6	Csf1r,Adam8,Traf6,B4galt1,Trf,Ccr2	tissue remodeling	0.483726
GO:0016337	1.53375	0.179627	132	11	Itgb2,Cdh1,Jup,Lims1,Plek,Prkcd,Myh9,Adam8,Itgam,Lyn,Selplg	cell-cell adhesion	0.509534
GO:0051100	2.18506	0.1797	26	3	Id2,Id1,Mapk3	negative regulation of binding	0.509534
GO:0048871	1.6862	0.180934	99	9	Csf1r,Adam8,Slc11a1,Traf6,Mkks,Coro1a,Trf,Ankrd11,Gpx1	multicellular organismal homeostasis	0.509534
GO:0043410	1.52089	0.182422	133	11	Ccl3,Map3k1,Cd74,Csf1r,Adam8,Zeb2,Pycard,Tirap,Trf,Pik3r6,Ceacam1	positive regulation of MAPK cascade	0.509534
GO:0030098	1.46076	0.183001	176	14	Spi1,Ptpn6,Id2,Cd74,Anxa1,Adam8,Zbtb7b,Sema4a,H2-DMa,Ccr2,Adam17,Nfam1,B2m,Lgals1	lymphocyte differentiation	0.509534
GO:0008643	2.04905	0.184159	46	5	Slc2a3,C3,Fabp5,Slc2a1,Sort1	carbohydrate transport	0.509534
GO:0000060	2.78875	0.185994	14	2	Cdkn1a,Slc11a1	protein import into nucleus, translocation	0.509534
GO:0002902	2.78875	0.185994	14	2	Cd74,Lyn	regulation of B cell apoptotic process	0.509534
GO:0002920	2.78875	0.185994	14	2	Ptpn6,C3	regulation of humoral immune response	0.509534
GO:0006687	2.78875	0.185994	14	2	Gm2a,Hexa	glycosphingolipid metabolic process	0.509534
GO:0030851	2.78875	0.185994	14	2	Spi1,Rara	granulocyte differentiation	0.509534
GO:0042058	2.78875	0.185994	14	2	App,Aplp2	regulation of epidermal growth factor receptor signaling pathway	0.509534
GO:0048147	2.78875	0.185994	14	2	Nupr1,Ifi30	negative regulation of fibroblast proliferation	0.509534
GO:0048535	2.78875	0.185994	14	2	Id2,Ltbr	lymph node development	0.509534
GO:0045444	1.63088	0.187637	102	9	Klf4,Id2,Ero1l,Mkks,Asxl1,Wfdc21,Cebpb,Gpx1,Bnip3	fat cell differentiation	0.512502
GO:0031334	1.9999	0.188478	47	5	Plek,Map3k1,Coro1a,Pycard,Fes	positive regulation of protein complex assembly	0.513266
GO:0009636	1.95305	0.193276	48	5	Ccl3,Ppp2cb,Nupr1,Id1,Gpx1	response to toxin	0.524771
GO:0032526	2.09367	0.194268	27	3	Klf4,Rara,Asxl1	response to retinoic acid	0.525902
GO:0043406	1.75809	0.195381	74	7	Map3k1,Adam8,Zeb2,Tirap,Trf,Pik3r6,Ceacam1	positive regulation of MAP kinase activity	0.527356
GO:0008584	1.90834	0.198532	49	5	Bcl2l1,Sgpl1,Ctsl,Nupr1,Rara	male gonad development	0.532719
GO:0046546	1.90834	0.198532	49	5	Bcl2l1,Sgpl1,Ctsl,Nupr1,Rara	development of primary male sexual characteristics	0.532719
GO:0018108	1.5462	0.203501	107	9	Ptpn6,Prkcd,App,Cd74,Csf1r,Fgr,Aplp2,Lyn,Fes	peptidyl-tyrosine phosphorylation	0.538178
GO:0051251	1.5462	0.203501	107	9	Cdkn1a,Cd74,Adam8,Traf6,Coro1a,Pycard,H2-DMa,Ccr2,Lgals1	positive regulation of lymphocyte activation	0.538178
GO:0019216	1.68179	0.205895	77	7	Apoe,Psap,Id2,C3,Rest,Abhd5,Lyn	regulation of lipid metabolic process	0.538178
GO:0032872	1.68179	0.205895	77	7	Map3k1,Zeb2,Prdx1,Tirap,Trf,Aida,Mapk3	regulation of stress-activated MAPK cascade	0.538178
GO:0006940	2.57378	0.207037	15	2	Ncf1,Adora2b	regulation of smooth muscle contraction	0.538178
GO:0043277	2.57378	0.207037	15	2	Lrp1,Ccr2	apoptotic cell clearance	0.538178
GO:0044130	2.57378	0.207037	15	2	Tlr2,Tirap	negative regulation of growth of symbiont in host	0.538178
GO:0044146	2.57378	0.207037	15	2	Tlr2,Tirap	negative regulation of growth of symbiont involved in interaction with host	0.538178
GO:0045061	2.57378	0.207037	15	2	Cd74,H2-DMa	thymic T cell selection	0.538178
GO:0048660	2.57378	0.207037	15	2	Id2,Ptgir	regulation of smooth muscle cell proliferation	0.538178
GO:0050732	2.57378	0.207037	15	2	Ptpn6,Prkcd	negative regulation of peptidyl-tyrosine phosphorylation	0.538178
GO:0030032	2.00957	0.209114	28	3	Vcl,Capzb,Wasf2	lamellipodium assembly	0.540506
GO:0060425	2.00957	0.209114	28	3	Plod3,Ctsz,Id1	lung morphogenesis	0.540506
GO:0030534	1.65779	0.21001	78	7	Cstb,Eps8,App,Hexa,Ppt1,Atp1a3,Mafg	adult behavior	0.540605
GO:0050671	1.8246	0.210334	51	5	Cdkn1a,Traf6,Coro1a,Pycard,Ccr2	positive regulation of lymphocyte proliferation	0.540605
GO:0043405	1.56098	0.22111	118	10	Ptpn6,Map3k1,Adam8,Zeb2,Tirap,Trf,Lyn,Aida,Pik3r6,Ceacam1	regulation of MAP kinase activity	0.55857
GO:0007160	1.74798	0.223717	53	5	Lims1,Adam8,Itgb1,Macf1,Sirpa	cell-matrix adhesion	0.55857
GO:0010631	1.74798	0.223717	53	5	Myh9,Itgb1,Sema4a,Macf1,Gpx1	epithelial cell migration	0.55857
GO:0033077	1.74798	0.223717	53	5	Cd74,Adam8,H2-DMa,Adam17,B2m	T cell differentiation in thymus	0.55857
GO:0006672	1.93197	0.224202	29	3	Gm2a,Hexa,Cers6	ceramide metabolic process	0.55857
GO:0006984	1.93197	0.224202	29	3	Ero1l,Ptpn1,Lmna	ER-nucleus signaling pathway	0.55857
GO:0002762	2.38943	0.228312	16	2	Ccl3,Lyn	negative regulation of myeloid leukocyte differentiation	0.55857
GO:0002828	2.38943	0.228312	16	2	Cd74,Ccr2	regulation of type 2 immune response	0.55857
GO:0007189	2.38943	0.228312	16	2	Adora2b,Ptgir	adenylate cyclase-activating G-protein coupled receptor signaling pathway	0.55857
GO:0016574	2.38943	0.228312	16	2	Rnf168,Trip12	histone ubiquitination	0.55857
GO:0030262	2.38943	0.228312	16	2	Ndufa13,Bnip3	apoptotic nuclear changes	0.55857
GO:0033344	2.38943	0.228312	16	2	Apoe,Lrp1	cholesterol efflux	0.55857
GO:0046626	2.38943	0.228312	16	2	Prkcd,Ptpre	regulation of insulin receptor signaling pathway	0.55857
GO:0048659	2.38943	0.228312	16	2	Id2,Ptgir	smooth muscle cell proliferation	0.55857
GO:0050848	2.38943	0.228312	16	2	Ccl3,Nfat5	regulation of calcium-mediated signaling	0.55857
GO:0071453	2.38943	0.228312	16	2	Adam8,Lmna	cellular response to oxygen levels	0.55857
GO:0071456	2.38943	0.228312	16	2	Adam8,Lmna	cellular response to hypoxia	0.55857
GO:0097006	2.38943	0.228312	16	2	Apoe,Ehd1	regulation of plasma lipoprotein particle levels	0.55857
GO:0007249	1.56819	0.229274	82	7	Hspb1,Clec4n,Pdcd11,Traf6,Prdx1,Flna,Tirap	I-kappaB kinase/NF-kappaB cascade	0.559429
GO:0035051	1.71199	0.230951	54	5	Jup,Itgb1,Lmna,Rest,Rara	cardiocyte differentiation	0.562021
GO:0006397	1.54726	0.234742	83	7	Pabpn1,App,Son,Sf3b1,Mbnl1,Npm1,Gm20521	mRNA processing	0.569731
GO:0043367	1.86015	0.239494	30	3	Zbtb7b,Sema4a,Ccr2	CD4-positive, alpha-beta T cell differentiation	0.579727
GO:0006643	1.64424	0.246404	56	5	Gm2a,Hexa,Pigq,Cers6,Sphk2	membrane lipid metabolic process	0.585893
GO:0071902	1.60259	0.247704	92	8	Map3k1,Csf1r,Adam8,Zeb2,Tirap,Trf,Pik3r6,Ceacam1	positive regulation of protein serine/threonine kinase activity	0.585893
GO:0001783	2.22983	0.249725	17	2	Cd74,Lyn	B cell apoptotic process	0.585893
GO:0006171	2.22983	0.249725	17	2	Adora2b,Ptgir	cAMP biosynthetic process	0.585893
GO:0006513	2.22983	0.249725	17	2	Rnf168,Ube2w	protein monoubiquitination	0.585893
GO:0007608	2.22983	0.249725	17	2	Mkks,B3gnt2	sensory perception of smell	0.585893
GO:0015844	2.22983	0.249725	17	2	Fcer1g,Fcgr3	monoamine transport	0.585893
GO:0044117	2.22983	0.249725	17	2	Tlr2,Tirap	growth of symbiont in host	0.585893
GO:0046427	2.22983	0.249725	17	2	Csf1r,Lyn	positive regulation of JAK-STAT cascade	0.585893
GO:0046677	2.22983	0.249725	17	2	Ppp2cb,Id1	response to antibiotic	0.585893
GO:0046785	2.22983	0.249725	17	2	Nin,Fes	microtubule polymerization	0.585893
GO:0048599	2.22983	0.249725	17	2	Jup,Cdc25b	oocyte development	0.585893
GO:0043068	1.48354	0.25475	136	11	Ccl3,Bcl2l1,Cdkn1a,Anxa1,Adam8,Itm2c,Notch2,B4galt1,Rest,Nupr1,Lyn	positive regulation of programmed cell death	0.593596
GO:0019233	1.79329	0.254955	31	3	Ccl3,Ccr2,Mapk3	sensory perception of pain	0.593596
GO:0035710	1.79329	0.254955	31	3	Zbtb7b,Sema4a,Ccr2	CD4-positive, alpha-beta T cell activation	0.593596
GO:0030198	1.52858	0.259441	96	8	Plod3,App,B4galt1,Crispld2,Aplp2,Anxa2,Tgfbi,Lgals3	extracellular matrix organization	0.60251
GO:0000079	2.0902	0.271193	18	2	Cdkn1a,Sfn	regulation of cyclin-dependent protein kinase activity	0.615736
GO:0002711	2.0902	0.271193	18	2	B2m,H2-D1	positive regulation of T cell mediated immunity	0.615736
GO:0003382	2.0902	0.271193	18	2	Plod3,Id1	epithelial cell morphogenesis	0.615736
GO:0007052	2.0902	0.271193	18	2	Tpx2,Flna	mitotic spindle organization	0.615736
GO:0009994	2.0902	0.271193	18	2	Jup,Cdc25b	oocyte differentiation	0.615736
GO:0030239	2.0902	0.271193	18	2	Itgb1,Actg1	myofibril assembly	0.615736
GO:0042092	2.0902	0.271193	18	2	Cd74,Ccr2	type 2 immune response	0.615736
GO:0043370	2.0902	0.271193	18	2	Zbtb7b,Ccr2	regulation of CD4-positive, alpha-beta T cell differentiation	0.615736
GO:0071383	2.0902	0.271193	18	2	Rest,Akap13	cellular response to steroid hormone stimulus	0.615736
GO:0043122	1.65176	0.276687	67	6	Hspb1,Clec4n,Pdcd11,Traf6,Prdx1,Flna	regulation of I-kappaB kinase/NF-kappaB cascade	0.626654
GO:0046578	1.44504	0.27984	101	8	Gdi2,Rasgrp4,Pycard,Plxnb2,Tbc1d2,Tbc1d10b,Flot1,Rhog	regulation of Ras protein signal transduction	0.632231
GO:0030218	1.62481	0.280688	68	6	Spi1,Id2,G6pdx,Lyn,Klf13,Klf2	erythrocyte differentiation	0.632585
GO:0045185	1.86288	0.284758	40	4	Jup,Srgn,Nin,Flna	maintenance of protein location	0.63754
GO:0000302	1.81208	0.291017	41	4	Ppp2cb,Prdx5,Prdx1,Gpx1	response to reactive oxygen species	0.63754
GO:0006665	1.81208	0.291017	41	4	Gm2a,Hexa,Cers6,Sphk2	sphingolipid metabolic process	0.63754
GO:0043087	1.49942	0.291407	110	9	Rgs19,Gdi2,Arhgap31,Pycard,Rgs10,Plxnb2,Tbc1d2,Tbc1d10b,Rhog	regulation of GTPase activity	0.63754
GO:0007159	1.96693	0.292641	19	2	Itgam,Selplg	leukocyte cell-cell adhesion	0.63754
GO:0007260	1.96693	0.292641	19	2	Csf1r,Lyn	tyrosine phosphorylation of STAT protein	0.63754
GO:0015908	1.96693	0.292641	19	2	Anxa1,Plin2	fatty acid transport	0.63754
GO:0030814	1.96693	0.292641	19	2	Adora2b,Ptgir	regulation of cAMP metabolic process	0.63754
GO:0030901	1.96693	0.292641	19	2	Aplp2,Kdm7a	midbrain development	0.63754
GO:0031572	1.96693	0.292641	19	2	Mapkapk2,Plk1	G2/M transition DNA damage checkpoint	0.63754
GO:0043488	1.96693	0.292641	19	2	Mapkapk2,Slc11a1	regulation of mRNA stability	0.63754
GO:0045132	1.96693	0.292641	19	2	Smc2,Espl1	meiotic chromosome segregation	0.63754
GO:0048708	1.96693	0.292641	19	2	Id2,Vim	astrocyte differentiation	0.63754
GO:2000377	1.96693	0.292641	19	2	Prkcd,Birc3	regulation of reactive oxygen species metabolic process	0.63754
GO:0033124	1.48444	0.293489	111	9	Rgs19,Gdi2,Arhgap31,Pycard,Rgs10,Plxnb2,Tbc1d2,Tbc1d10b,Rhog	regulation of GTP catabolic process	0.637868
GO:0002260	1.7641	0.297803	42	4	Cd74,Coro1a,Lyn,Pirb	lymphocyte homeostasis	0.644185
GO:0051495	1.7641	0.297803	42	4	Map3k1,Coro1a,Pycard,Fes	positive regulation of cytoskeleton organization	0.644185
GO:0006520	1.44121	0.301176	114	9	Ddah2,Mgst1,Tdh,P4hb,Idh1,Hdc,G6pdx,Gsr,Alox5ap	cellular amino acid metabolic process	0.649944
GO:0008064	1.71855	0.305079	43	4	Map3k1,Prkcd,Coro1a,Pycard	regulation of actin polymerization or depolymerization	0.653741
GO:0043123	1.71855	0.305079	43	4	Clec4n,Pdcd11,Traf6,Flna	positive regulation of I-kappaB kinase/NF-kappaB cascade	0.653741
GO:0072659	1.71855	0.305079	43	4	Myl12a,Macf1,Flot1,Rhog	protein localization to plasma membrane	0.653741
GO:0002064	1.47978	0.311668	74	6	Plod3,Vim,B4galt1,Iqgap1,Id1,Gpx1	epithelial cell development	0.655967
GO:0045637	1.47978	0.311668	74	6	Ccl3,Id2,Rara,Lyn,Klf13,Fes	regulation of myeloid cell differentiation	0.655967
GO:0030832	1.67528	0.312809	44	4	Map3k1,Prkcd,Coro1a,Pycard	regulation of actin filament length	0.655967
GO:0043393	1.67528	0.312809	44	4	App,Aplp2,Aida,Mapk3	regulation of protein binding	0.655967
GO:0030330	1.85722	0.314004	20	2	Cd74,Npm1	DNA damage response, signal transduction by p53 class mediator	0.655967
GO:0031032	1.85722	0.314004	20	2	Itgb1,Actg1	actomyosin structure organization	0.655967
GO:0043487	1.85722	0.314004	20	2	Mapkapk2,Slc11a1	regulation of RNA stability	0.655967
GO:0048730	1.85722	0.314004	20	2	Klf4,Plod3	epidermis morphogenesis	0.655967
GO:0051928	1.85722	0.314004	20	2	Ccl3,Trpv2	positive regulation of calcium ion transport	0.655967
GO:0060323	1.85722	0.314004	20	2	Sgpl1,Ankrd11	head morphogenesis	0.655967
GO:0061097	1.85722	0.314004	20	2	App,Aplp2	regulation of protein tyrosine kinase activity	0.655967
GO:0034976	1.63411	0.320958	45	4	Ero1l,Fam129a,Ptpn1,Cebpb	response to endoplasmic reticulum stress	0.667446
GO:0045621	1.63411	0.320958	45	4	Cd74,Adam8,H2-DMa,Ccr2	positive regulation of lymphocyte differentiation	0.667446
GO:0007051	1.59491	0.329492	46	4	Myh9,Tpx2,Flna,Espl1	spindle organization	0.674127
GO:0002292	1.75926	0.335222	21	2	Sema4a,Ccr2	T cell differentiation involved in immune response	0.674127
GO:0006637	1.75926	0.335222	21	2	Dgat1,Acot1	acyl-CoA metabolic process	0.674127
GO:0030199	1.75926	0.335222	21	2	Plod3,Anxa2	collagen fibril organization	0.674127
GO:0030968	1.75926	0.335222	21	2	Ero1l,Ptpn1	endoplasmic reticulum unfolded protein response	0.674127
GO:0033598	1.75926	0.335222	21	2	Id2,Cebpb	mammary gland epithelial cell proliferation	0.674127
GO:0034341	1.75926	0.335222	21	2	Ifitm1,Slc11a1	response to interferon-gamma	0.674127
GO:0042093	1.75926	0.335222	21	2	Sema4a,Ccr2	T-helper cell differentiation	0.674127
GO:0042116	1.75926	0.335222	21	2	Slc11a1,Tyrobp	macrophage activation	0.674127
GO:0043279	1.75926	0.335222	21	2	Bcl2l1,Prkcg	response to alkaloid	0.674127
GO:0045058	1.75926	0.335222	21	2	Cd74,H2-DMa	T cell selection	0.674127
GO:0045668	1.75926	0.335222	21	2	Id2,Id1	negative regulation of osteoblast differentiation	0.674127
GO:0046058	1.75926	0.335222	21	2	Adora2b,Ptgir	cAMP metabolic process	0.674127
GO:0050772	1.75926	0.335222	21	2	Trpv2,Plxnb2	positive regulation of axonogenesis	0.674127
GO:0050869	1.75926	0.335222	21	2	Id2,Lyn	negative regulation of B cell activation	0.674127
GO:0000187	1.55753	0.338381	47	4	Map3k1,Adam8,Tirap,Trf	activation of MAPK activity	0.678987
GO:0010035	1.4688	0.342708	87	7	Hmox1,Ppp2cb,Id2,Prdx5,Prdx1,Mtf1,Gpx1	response to inorganic substance	0.686165
GO:0051321	1.45039	0.346336	88	7	Actr2,Myh9,Actr3,Cdc25b,Smc2,Mki67,Espl1	meiotic cell cycle	0.691915
GO:0031098	1.43243	0.350239	89	7	Map3k1,Zeb2,Prdx1,Tirap,Trf,Aida,Mapk3	stress-activated protein kinase signaling cascade	0.696347
GO:0051403	1.43243	0.350239	89	7	Map3k1,Zeb2,Prdx1,Tirap,Trf,Aida,Mapk3	stress-activated MAPK cascade	0.696347
GO:0009203	1.27348	0.350837	199	14	Rgs19,Gdi2,Arhgap31,Rab14,Macf1,Pycard,Rgs10,Rab27a,Gnai2,Plxnb2,Atp6v1g1,Tbc1d2,Tbc1d10b,Rhog	ribonucleoside triphosphate catabolic process	0.696347
GO:0002287	1.671	0.356243	22	2	Sema4a,Ccr2	alpha-beta T cell activation involved in immune response	0.696673
GO:0007173	1.671	0.356243	22	2	App,Aplp2	epidermal growth factor receptor signaling pathway	0.696673
GO:0010332	1.671	0.356243	22	2	Bcl2l1,Gpx1	response to gamma radiation	0.696673
GO:0034620	1.671	0.356243	22	2	Ero1l,Ptpn1	cellular response to unfolded protein	0.696673
GO:0048024	1.671	0.356243	22	2	Mbnl1,Npm1	regulation of mRNA splicing, via spliceosome	0.696673
GO:0070979	1.671	0.356243	22	2	Ube2c,Ube2w	protein K11-linked ubiquitination	0.696673
GO:0014902	1.48775	0.357093	49	4	Myh9,Capn2,Gpx1,Sort1	myotube differentiation	0.696673
GO:0046632	1.48775	0.357093	49	4	Anxa1,Zbtb7b,Sema4a,Ccr2	alpha-beta T cell differentiation	0.696673
GO:0006282	1.59114	0.377022	23	2	Rnf168,Trip12	regulation of DNA repair	0.725836
GO:0007631	1.59114	0.377022	23	2	App,Aplp2	feeding behavior	0.725836
GO:0010976	1.59114	0.377022	23	2	Camk1d,Fes	positive regulation of neuron projection development	0.725836
GO:0051897	1.59114	0.377022	23	2	Adam8,Gpx1	positive regulation of protein kinase B signaling cascade	0.725836
GO:0007568	1.5816	0.380803	58	5	Id2,Ctsl,Lmna,Npm1,Ifi27l2a	aging	0.725836
GO:0040014	1.5816	0.380803	58	5	Apoe,Sgpl1,App,Mkks,G6pdx	regulation of multicellular organism growth	0.725836
GO:0045580	1.5816	0.380803	58	5	Cd74,Adam8,Zbtb7b,H2-DMa,Ccr2	regulation of T cell differentiation	0.725836
GO:0016197	1.55202	0.384721	59	5	Ehd1,Rab14,Flna,Arl4c,Mapk3	endosomal transport	0.725836
GO:0051056	1.3844	0.388501	105	8	Gdi2,Rasgrp4,Pycard,Plxnb2,Tbc1d2,Tbc1d10b,Flot1,Rhog	regulation of small GTPase mediated signal transduction	0.725836
GO:0051146	1.3844	0.388501	105	8	Myh9,Itgb1,Capn2,Lmna,Rara,Actg1,Gpx1,Sort1	striated muscle cell differentiation	0.725836
GO:0007009	1.52352	0.389042	60	5	Ndrg1,Myl12a,Macf1,Flot1,Rhog	plasma membrane organization	0.725836
GO:0046661	1.49603	0.393746	61	5	Bcl2l1,Sgpl1,Ctsl,Nupr1,Rara	male sex differentiation	0.725836
GO:0001933	1.35592	0.394607	107	8	Ptpn6,Hspb1,Mical1,Prkcd,Cdkn1a,Fam129a,Lyn,Aida	negative regulation of protein phosphorylation	0.725836
GO:0006184	1.28481	0.396217	169	12	Rgs19,Gdi2,Arhgap31,Rab14,Pycard,Rgs10,Rab27a,Gnai2,Plxnb2,Tbc1d2,Tbc1d10b,Rhog	GTP catabolic process	0.725836
GO:0007040	1.51854	0.397518	24	2	Hexa,Ppt1	lysosome organization	0.725836
GO:0030433	1.51854	0.397518	24	2	Hsp90b1,Edem1	ER-associated protein catabolic process	0.725836
GO:0032623	1.51854	0.397518	24	2	Slc11a1,Ccr2	interleukin-2 production	0.725836
GO:0042770	1.51854	0.397518	24	2	Cd74,Npm1	signal transduction in response to DNA damage	0.725836
GO:0042990	1.51854	0.397518	24	2	Prdx1,Flna	regulation of transcription factor import into nucleus	0.725836
GO:0030183	1.46951	0.398812	62	5	Ptpn6,Id2,Adam17,Nfam1,Lgals1	B cell differentiation	0.725836
GO:0051250	1.46951	0.398812	62	5	Ptpn6,Tnfaip8l2,Id2,Cd74,Lyn	negative regulation of lymphocyte activation	0.725836
GO:0032269	1.26816	0.40075	171	12	Ptpn6,Hspb1,Rnf168,Mical1,Hmg20b,Prkcd,Cdkn1a,Trip12,Fam129a,Rara,Lyn,Aida	negative regulation of cellular protein metabolic process	0.725836
GO:0042129	1.44391	0.40422	63	5	Ptpn6,Traf6,Coro1a,Pycard,Ccr2	regulation of T cell proliferation	0.725836
GO:0034504	1.41917	0.409949	64	5	Cdkn1a,Lmna,Prdx1,Flna,Syne2	protein localization to nucleus	0.725836
GO:0022407	1.73114	0.424739	32	3	Prkcd,Adam8,Lyn	regulation of cell-cell adhesion	0.725836
GO:0045665	1.73114	0.424739	32	3	Id2,App,Rest	negative regulation of neuron differentiation	0.725836
GO:0051017	1.73114	0.424739	32	3	Eps8,Lcp1,Ezr	actin filament bundle assembly	0.725836
GO:0090002	1.73114	0.424739	32	3	Myl12a,Macf1,Rhog	establishment of protein localization to plasma membrane	0.725836
GO:0010256	1.32517	0.425863	123	9	Ndrg1,Srgn,Myl12a,Lmna,Macf1,Flot1,Mapk3,Syne2,Rhog	endomembrane system organization	0.725836
GO:0030217	1.31339	0.428325	124	9	Cd74,Anxa1,Adam8,Zbtb7b,Sema4a,H2-DMa,Ccr2,Adam17,B2m	T cell differentiation	0.725836
GO:0032507	1.67313	0.43166	33	3	Jup,Nin,Flna	maintenance of protein location in cell	0.725836
GO:0045834	1.67313	0.43166	33	3	Apoe,Abhd5,Lyn	positive regulation of lipid metabolic process	0.725836
GO:0048545	1.67313	0.43166	33	3	Ctsl,Rest,Akap13	response to steroid hormone stimulus	0.725836
GO:0014070	1.29045	0.433838	126	9	Ccl3,Bcl2l1,Hsp90b1,Ctsl,Sell,Rest,Mapk3,Akap13,Prkcg	response to organic cyclic compound	0.725836
GO:0007519	1.32808	0.435684	68	5	Mbnl1,Mylpf,Nupr1,Gpx1,Myl6	skeletal muscle tissue development	0.725836
GO:0046328	1.32808	0.435684	68	5	Map3k1,Zeb2,Tirap,Trf,Aida	regulation of JNK cascade	0.725836
GO:0060538	1.32808	0.435684	68	5	Mbnl1,Mylpf,Nupr1,Gpx1,Myl6	skeletal muscle organ development	0.725836
GO:0008306	1.61886	0.439149	34	3	App,Ppt1,Atp1a3	associative learning	0.725836
GO:0032649	1.61886	0.439149	34	3	Slc11a1,Pycard,Ccr2	regulation of interferon-gamma production	0.725836
GO:0042326	1.26828	0.440101	128	9	Ptpn6,Hspb1,Mical1,Prkcd,Cdkn1a,Fam129a,Birc3,Lyn,Aida	negative regulation of phosphorylation	0.725836
GO:0000245	1.85452	0.441814	10	1	Mbnl1	spliceosomal complex assembly	0.725836
GO:0010874	1.85452	0.441814	10	1	Lrp1	regulation of cholesterol efflux	0.725836
GO:0020027	1.85452	0.441814	10	1	Lyn	hemoglobin metabolic process	0.725836
GO:0022011	1.85452	0.441814	10	1	Ndrg1	myelination in peripheral nervous system	0.725836
GO:0032873	1.85452	0.441814	10	1	Aida	negative regulation of stress-activated MAPK cascade	0.725836
GO:0034381	1.85452	0.441814	10	1	Ehd1	plasma lipoprotein particle clearance	0.725836
GO:0035909	1.85452	0.441814	10	1	Lrp1	aorta morphogenesis	0.725836
GO:0042104	1.85452	0.441814	10	1	Pycard	positive regulation of activated T cell proliferation	0.725836
GO:0042832	1.85452	0.441814	10	1	Slc11a1	defense response to protozoan	0.725836
GO:0043001	1.85452	0.441814	10	1	Macf1	Golgi to plasma membrane protein transport	0.725836
GO:0043616	1.85452	0.441814	10	1	Sfn	keratinocyte proliferation	0.725836
GO:0045671	1.85452	0.441814	10	1	Ccl3	negative regulation of osteoclast differentiation	0.725836
GO:0045773	1.85452	0.441814	10	1	Trpv2	positive regulation of axon extension	0.725836
GO:0046902	1.85452	0.441814	10	1	Bnip3	regulation of mitochondrial membrane permeability	0.725836
GO:0048557	1.85452	0.441814	10	1	Id2	embryonic digestive tract morphogenesis	0.725836
GO:0048661	1.85452	0.441814	10	1	Id2	positive regulation of smooth muscle cell proliferation	0.725836
GO:0050860	1.85452	0.441814	10	1	Ptpn6	negative regulation of T cell receptor signaling pathway	0.725836
GO:0050872	1.85452	0.441814	10	1	Wfdc21	white fat cell differentiation	0.725836
GO:0050884	1.85452	0.441814	10	1	Hexa	neuromuscular process controlling posture	0.725836
GO:0051443	1.85452	0.441814	10	1	Plk1	positive regulation of ubiquitin-protein ligase activity	0.725836
GO:0051642	1.85452	0.441814	10	1	Syne2	centrosome localization	0.725836
GO:0070242	1.85452	0.441814	10	1	Adam8	thymocyte apoptotic process	0.725836
GO:0070252	1.85452	0.441814	10	1	Myl6	actin-mediated cell contraction	0.725836
GO:0070509	1.85452	0.441814	10	1	Trpv2	calcium ion import	0.725836
GO:0071158	1.85452	0.441814	10	1	Id2	positive regulation of cell cycle arrest	0.725836
GO:0071347	1.85452	0.441814	10	1	Traf6	cellular response to interleukin-1	0.725836
GO:0090003	1.85452	0.441814	10	1	Rhog	regulation of establishment of protein localization to plasma membrane	0.725836
GO:2000178	1.85452	0.441814	10	1	Id2	negative regulation of neural precursor cell proliferation	0.725836
GO:0032147	1.43696	0.44611	76	6	Map3k1,Adam8,Slc11a1,Tpx2,Tirap,Trf	activation of protein kinase activity	0.725836
GO:0043254	1.43696	0.44611	76	6	Plek,Map3k1,Prkcd,Coro1a,Pycard,Fes	regulation of protein complex assembly	0.725836
GO:0042157	1.56798	0.44715	35	3	Apoe,Pigq,Ppt1	lipoprotein metabolic process	0.725836
GO:0043484	1.56798	0.44715	35	3	Son,Mbnl1,Npm1	regulation of RNA splicing	0.725836
GO:0045638	1.56798	0.44715	35	3	Ccl3,Lyn,Klf13	negative regulation of myeloid cell differentiation	0.725836
GO:0055007	1.56798	0.44715	35	3	Itgb1,Lmna,Rara	cardiac muscle cell differentiation	0.725836
GO:0009991	1.41646	0.448913	77	6	Ctsd,Adora2b,Ctsl,Mkks,Slc2a1,Rasgrp4	response to extracellular stimulus	0.725836
GO:0043547	1.39653	0.452026	78	6	Rgs19,Gdi2,Arhgap31,Rgs10,Tbc1d2,Rhog	positive regulation of GTPase activity	0.725836
GO:0006839	1.52019	0.455605	36	3	Kif5b,Mpc2,Bnip3	mitochondrial transport	0.725836
GO:0019722	1.52019	0.455605	36	3	Ccl3,Nfat5,Lat2	calcium-mediated signaling	0.725836
GO:0031123	1.52019	0.455605	36	3	Pabpn1,App,Gm20521	RNA 3'-end processing	0.725836
GO:0001649	1.35827	0.459132	80	6	Ccl3,Id2,Ifitm1,Clec5a,Id1,Cebpb	osteoblast differentiation	0.725836
GO:0006633	1.47521	0.464465	37	3	Cd74,Alox5,Alox5ap	fatty acid biosynthetic process	0.725836
GO:0008610	1.233	0.469301	146	10	Dgat1,C3,Cd74,Alox5,Pigq,Cers6,Fabp5,Rest,Abhd5,Alox5ap	lipid biosynthetic process	0.725836
GO:0000381	1.66888	0.47346	11	1	Mbnl1	regulation of alternative mRNA splicing, via spliceosome	0.725836
GO:0001539	1.66888	0.47346	11	1	Mkks	ciliary or flagellar motility	0.725836
GO:0001759	1.66888	0.47346	11	1	Jup	organ induction	0.725836
GO:0002455	1.66888	0.47346	11	1	Ptpn6	humoral immune response mediated by circulating immunoglobulin	0.725836
GO:0003081	1.66888	0.47346	11	1	G6pdx	regulation of systemic arterial blood pressure by renin-angiotensin	0.725836
GO:0003171	1.66888	0.47346	11	1	Jup	atrioventricular valve development	0.725836
GO:0006506	1.66888	0.47346	11	1	Pigq	GPI anchor biosynthetic process	0.725836
GO:0007031	1.66888	0.47346	11	1	Fis1	peroxisome organization	0.725836
GO:0007398	1.66888	0.47346	11	1	Jup	ectoderm development	0.725836
GO:0009755	1.66888	0.47346	11	1	Akap13	hormone-mediated signaling pathway	0.725836
GO:0010828	1.66888	0.47346	11	1	C3	positive regulation of glucose transport	0.725836
GO:0019430	1.66888	0.47346	11	1	Prdx1	removal of superoxide radicals	0.725836
GO:0022406	1.66888	0.47346	11	1	Plek	membrane docking	0.725836
GO:0022408	1.66888	0.47346	11	1	Prkcd	negative regulation of cell-cell adhesion	0.725836
GO:0031113	1.66888	0.47346	11	1	Fes	regulation of microtubule polymerization	0.725836
GO:0032374	1.66888	0.47346	11	1	Lrp1	regulation of cholesterol transport	0.725836
GO:0033209	1.66888	0.47346	11	1	Tnfrsf1a	tumor necrosis factor-mediated signaling pathway	0.725836
GO:0034502	1.66888	0.47346	11	1	Plk1	protein localization to chromosome	0.725836
GO:0035914	1.66888	0.47346	11	1	Nupr1	skeletal muscle cell differentiation	0.725836
GO:0043043	1.66888	0.47346	11	1	Alox5ap	peptide biosynthetic process	0.725836
GO:0045071	1.66888	0.47346	11	1	Ifitm1	negative regulation of viral genome replication	0.725836
GO:0045429	1.66888	0.47346	11	1	Tlr2	positive regulation of nitric oxide biosynthetic process	0.725836
GO:0045471	1.66888	0.47346	11	1	Eps8	response to ethanol	0.725836
GO:0045604	1.66888	0.47346	11	1	Mafg	regulation of epidermal cell differentiation	0.725836
GO:0045687	1.66888	0.47346	11	1	Id2	positive regulation of glial cell differentiation	0.725836
GO:0045931	1.66888	0.47346	11	1	App	positive regulation of mitotic cell cycle	0.725836
GO:0046676	1.66888	0.47346	11	1	Rest	negative regulation of insulin secretion	0.725836
GO:0050910	1.66888	0.47346	11	1	Mkks	detection of mechanical stimulus involved in sensory perception of sound	0.725836
GO:0050994	1.66888	0.47346	11	1	Abhd5	regulation of lipid catabolic process	0.725836
GO:0060442	1.66888	0.47346	11	1	Cd44	branching involved in prostate gland morphogenesis	0.725836
GO:0060742	1.66888	0.47346	11	1	Psap	epithelial cell differentiation involved in prostate gland development	0.725836
GO:0070076	1.66888	0.47346	11	1	Kdm7a	histone lysine demethylation	0.725836
GO:0071479	1.66888	0.47346	11	1	Bcl2l1	cellular response to ionizing radiation	0.725836
GO:0072661	1.66888	0.47346	11	1	Myl12a	protein targeting to plasma membrane	0.725836
GO:0043407	1.4328	0.473679	38	3	Ptpn6,Lyn,Aida	negative regulation of MAP kinase activity	0.725836
GO:0051259	1.28766	0.476501	84	6	Cdh1,Mgst1,Olfm1,Stom,Aldoa,Npm1	protein oligomerization	0.725836
GO:0072657	1.27112	0.481426	85	6	Ncf1,Myl12a,Macf1,Flna,Flot1,Rhog	protein localization to membrane	0.725836
GO:0006898	1.39275	0.483202	39	3	Fcgr1,Lrp1,Mapk3	receptor-mediated endocytosis	0.725836
GO:0007569	1.35486	0.49299	40	3	Id2,Lmna,Npm1	cell aging	0.725836
GO:0044242	1.35486	0.49299	40	3	Gm2a,Hexa,Abhd5	cellular lipid catabolic process	0.725836
GO:0006790	1.33326	0.496292	95	7	Mgst1,Dgat1,Idh1,G6pdx,Gsr,Alox5ap,Acot1	sulfur compound metabolic process	0.725836
GO:0015711	1.33326	0.496292	95	7	Slc2a3,Anxa1,Slc11a1,Mpc2,Plin2,Slc2a1,Abca7	organic anion transport	0.725836
GO:0009267	1.31897	0.503003	41	3	Ctsd,Ctsl,Slc2a1	cellular response to starvation	0.725836
GO:0030856	1.31897	0.503003	41	3	Xdh,Btg1,Mafg	regulation of epithelial cell differentiation	0.725836
GO:0034599	1.31897	0.503003	41	3	Prdx5,Prdx1,Gpx1	cellular response to oxidative stress	0.725836
GO:0050731	1.31897	0.503003	41	3	Cd74,Csf1r,Lyn	positive regulation of peptidyl-tyrosine phosphorylation	0.725836
GO:0000266	1.51691	0.503318	12	1	Fis1	mitochondrial fission	0.725836
GO:0000303	1.51691	0.503318	12	1	Prdx1	response to superoxide	0.725836
GO:0001893	1.51691	0.503318	12	1	Ctsl	maternal placenta development	0.725836
GO:0002076	1.51691	0.503318	12	1	Clec5a	osteoblast development	0.725836
GO:0002320	1.51691	0.503318	12	1	Spi1	lymphoid progenitor cell differentiation	0.725836
GO:0002467	1.51691	0.503318	12	1	Adam17	germinal center formation	0.725836
GO:0006309	1.51691	0.503318	12	1	Bnip3	apoptotic DNA fragmentation	0.725836
GO:0007340	1.51691	0.503318	12	1	B4galt1	acrosome reaction	0.725836
GO:0009410	1.51691	0.503318	12	1	Gpx1	response to xenobiotic stimulus	0.725836
GO:0009988	1.51691	0.503318	12	1	B4galt1	cell-cell recognition	0.725836
GO:0010824	1.51691	0.503318	12	1	Npm1	regulation of centrosome duplication	0.725836
GO:0010977	1.51691	0.503318	12	1	Vim	negative regulation of neuron projection development	0.725836
GO:0014015	1.51691	0.503318	12	1	Id2	positive regulation of gliogenesis	0.725836
GO:0014044	1.51691	0.503318	12	1	Ndrg1	Schwann cell development	0.725836
GO:0030261	1.51691	0.503318	12	1	Smc2	chromosome condensation	0.725836
GO:0030889	1.51691	0.503318	12	1	Lyn	negative regulation of B cell proliferation	0.725836
GO:0032091	1.51691	0.503318	12	1	Mapk3	negative regulation of protein binding	0.725836
GO:0032855	1.51691	0.503318	12	1	Rhog	positive regulation of Rac GTPase activity	0.725836
GO:0034122	1.51691	0.503318	12	1	Lyn	negative regulation of toll-like receptor signaling pathway	0.725836
GO:0035176	1.51691	0.503318	12	1	Mkks	social behavior	0.725836
GO:0042274	1.51691	0.503318	12	1	Npm1	ribosomal small subunit biogenesis	0.725836
GO:0042345	1.51691	0.503318	12	1	Prdx1	regulation of NF-kappaB import into nucleus	0.725836
GO:0043297	1.51691	0.503318	12	1	Cdh1	apical junction assembly	0.725836
GO:0043372	1.51691	0.503318	12	1	Ccr2	positive regulation of CD4-positive, alpha-beta T cell differentiation	0.725836
GO:0045494	1.51691	0.503318	12	1	Mkks	photoreceptor cell maintenance	0.725836
GO:0045648	1.51691	0.503318	12	1	Id2	positive regulation of erythrocyte differentiation	0.725836
GO:0045686	1.51691	0.503318	12	1	Id2	negative regulation of glial cell differentiation	0.725836
GO:0045739	1.51691	0.503318	12	1	Rnf168	positive regulation of DNA repair	0.725836
GO:0046470	1.51691	0.503318	12	1	Fabp5	phosphatidylcholine metabolic process	0.725836
GO:0046825	1.51691	0.503318	12	1	Sfn	regulation of protein export from nucleus	0.725836
GO:0050850	1.51691	0.503318	12	1	Ccl3	positive regulation of calcium-mediated signaling	0.725836
GO:0051351	1.51691	0.503318	12	1	Plk1	positive regulation of ligase activity	0.725836
GO:0071156	1.51691	0.503318	12	1	Id2	regulation of cell cycle arrest	0.725836
GO:0035264	1.27433	0.507342	99	7	Sgpl1,App,Mkks,G6pdx,Ankrd11,Rara,Klf2	multicellular organism growth	0.725836
GO:0051402	1.26039	0.510654	100	7	Ccl3,Bcl2l1,App,Adam8,Gpx1,Bnip3,Prkcg	neuron apoptotic process	0.725836
GO:0016051	1.28492	0.513204	42	3	B4galt1,Pgd,G6pdx	carbohydrate biosynthetic process	0.725836
GO:0046474	1.28492	0.513204	42	3	Pigq,Fabp5,Abhd5	glycerophospholipid biosynthetic process	0.725836
GO:0055088	1.28492	0.513204	42	3	Apoe,Dgat1,Ehd1	lipid homeostasis	0.725836
GO:0031647	1.45514	0.529149	50	4	Pycard,Flna,Ifi30,Id1	regulation of protein stability	0.725836
GO:0045667	1.45514	0.529149	50	4	Id2,Ifitm1,Id1,Cebpb	regulation of osteoblast differentiation	0.725836
GO:0071901	1.45514	0.529149	50	4	Ptpn6,Cdkn1a,Lyn,Aida	negative regulation of protein serine/threonine kinase activity	0.725836
GO:0000305	1.39027	0.531487	13	1	Prdx1	response to oxygen radical	0.725836
GO:0001562	1.39027	0.531487	13	1	Slc11a1	response to protozoan	0.725836
GO:0002820	1.39027	0.531487	13	1	Ptpn6	negative regulation of adaptive immune response	0.725836
GO:0003179	1.39027	0.531487	13	1	Jup	heart valve morphogenesis	0.725836
GO:0006505	1.39027	0.531487	13	1	Pigq	GPI anchor metabolic process	0.725836
GO:0006826	1.39027	0.531487	13	1	Trf	iron ion transport	0.725836
GO:0006893	1.39027	0.531487	13	1	Macf1	Golgi to plasma membrane transport	0.725836
GO:0007212	1.39027	0.531487	13	1	Flna	dopamine receptor signaling pathway	0.725836
GO:0016577	1.39027	0.531487	13	1	Kdm7a	histone demethylation	0.725836
GO:0019933	1.39027	0.531487	13	1	Ptgir	cAMP-mediated signaling	0.725836
GO:0031529	1.39027	0.531487	13	1	Csf1r	ruffle organization	0.725836
GO:0032272	1.39027	0.531487	13	1	Prkcd	negative regulation of protein polymerization	0.725836
GO:0032288	1.39027	0.531487	13	1	Cd9	myelin assembly	0.725836
GO:0032314	1.39027	0.531487	13	1	Pycard	regulation of Rac GTPase activity	0.725836
GO:0032370	1.39027	0.531487	13	1	Lrp1	positive regulation of lipid transport	0.725836
GO:0033059	1.39027	0.531487	13	1	Rab27a	cellular pigmentation	0.725836
GO:0042168	1.39027	0.531487	13	1	Hmox1	heme metabolic process	0.725836
GO:0042446	1.39027	0.531487	13	1	Rest	hormone biosynthetic process	0.725836
GO:0043552	1.39027	0.531487	13	1	Lyn	positive regulation of phosphatidylinositol 3-kinase activity	0.725836
GO:0045581	1.39027	0.531487	13	1	Cd74	negative regulation of T cell differentiation	0.725836
GO:0046068	1.39027	0.531487	13	1	Adora2b	cGMP metabolic process	0.725836
GO:0046513	1.39027	0.531487	13	1	Cers6	ceramide biosynthetic process	0.725836
GO:0046605	1.39027	0.531487	13	1	Npm1	regulation of centrosome cycle	0.725836
GO:0048710	1.39027	0.531487	13	1	Id2	regulation of astrocyte differentiation	0.725836
GO:0048713	1.39027	0.531487	13	1	Id2	regulation of oligodendrocyte differentiation	0.725836
GO:0051489	1.39027	0.531487	13	1	Prkcd	regulation of filopodium assembly	0.725836
GO:0060561	1.39027	0.531487	13	1	B4galt1	apoptotic process involved in morphogenesis	0.725836
GO:0061001	1.39027	0.531487	13	1	Pdlim5	regulation of dendritic spine morphogenesis	0.725836
GO:0070306	1.39027	0.531487	13	1	Vim	lens fiber cell differentiation	0.725836
GO:0070373	1.39027	0.531487	13	1	Lyn	negative regulation of ERK1 and ERK2 cascade	0.725836
GO:0070555	1.39027	0.531487	13	1	Traf6	response to interleukin-1	0.725836
GO:0090398	1.39027	0.531487	13	1	Id2	cellular senescence	0.725836
GO:0016042	1.42392	0.532972	51	4	Gm2a,Apoe,Hexa,Abhd5	lipid catabolic process	0.72678
GO:0050851	1.394	0.537178	52	4	Ptpn6,Lat2,Lyn,Nfam1	antigen receptor-mediated signaling pathway	0.731426
GO:0007264	1.21778	0.544792	118	8	Gdi2,Arhgap31,Rsu1,Wasf2,G3bp2,Rasgrp4,Dok3,Flot1	small GTPase mediated signal transduction	0.732926
GO:0016071	1.19558	0.550711	120	8	Pabpn1,Eif3e,App,Son,Sf3b1,Mbnl1,Npm1,Gm20521	mRNA metabolic process	0.732926
GO:0019932	1.31128	0.551846	55	4	Ccl3,Nfat5,Lat2,Ptgir	second-messenger-mediated signaling	0.732926
GO:0040013	1.31128	0.551846	55	4	Cnn2,Ifitm1,Ifitm3,Lrp1	negative regulation of locomotion	0.732926
GO:0042493	1.28582	0.557336	56	4	Tlr2,Rest,Atp1a3,Adam17	response to drug	0.732926
GO:0051260	1.28582	0.557336	56	4	Cdh1,Mgst1,Stom,Aldoa	protein homooligomerization	0.732926
GO:0000380	1.28312	0.558063	14	1	Mbnl1	alternative mRNA splicing, via spliceosome	0.732926
GO:0001676	1.28312	0.558063	14	1	Acot1	long-chain fatty acid metabolic process	0.732926
GO:0002763	1.28312	0.558063	14	1	Id2	positive regulation of myeloid leukocyte differentiation	0.732926
GO:0003170	1.28312	0.558063	14	1	Jup	heart valve development	0.732926
GO:0003197	1.28312	0.558063	14	1	Thbs1	endocardial cushion development	0.732926
GO:0006482	1.28312	0.558063	14	1	Kdm7a	protein demethylation	0.732926
GO:0009247	1.28312	0.558063	14	1	Pigq	glycolipid biosynthetic process	0.732926
GO:0010453	1.28312	0.558063	14	1	Jup	regulation of cell fate commitment	0.732926
GO:0030224	1.28312	0.558063	14	1	Myh9	monocyte differentiation	0.732926
GO:0035456	1.28312	0.558063	14	1	Ifitm1	response to interferon-beta	0.732926
GO:0043666	1.28312	0.558063	14	1	Hsp90b1	regulation of phosphoprotein phosphatase activity	0.732926
GO:0046888	1.28312	0.558063	14	1	Rest	negative regulation of hormone secretion	0.732926
GO:0050709	1.28312	0.558063	14	1	Srgn	negative regulation of protein secretion	0.732926
GO:0050810	1.28312	0.558063	14	1	Rest	regulation of steroid biosynthetic process	0.732926
GO:0070232	1.28312	0.558063	14	1	Adam8	regulation of T cell apoptotic process	0.732926
GO:0031346	1.26133	0.563087	57	4	Trpv2,Plxnb2,Camk1d,Fes	positive regulation of cell projection organization	0.732926
GO:0043065	1.20601	0.568137	134	9	Ccl3,Bcl2l1,Anxa1,Adam8,Notch2,B4galt1,Rest,Nupr1,Lyn	positive regulation of apoptotic process	0.732926
GO:0007605	1.23774	0.569077	58	4	Cdh1,Hexa,Mkks,Gpx1	sensory perception of sound	0.732926
GO:0035023	1.23774	0.569077	58	4	Pycard,Plxnb2,Flot1,Rhog	regulation of Rho protein signal transduction	0.732926
GO:0050905	1.23774	0.569077	58	4	Gm2a,App,Hexa,Aplp2	neuromuscular process	0.732926
GO:0009725	1.19621	0.570271	135	9	Ctsl,Prkcd,Mkks,Ptpn1,Rest,Ptpre,Lyn,Akap13,Sort1	response to hormone stimulus	0.732926
GO:0007600	1.17707	0.574982	137	9	Cdh1,Ccl3,Hexa,Mkks,Ppt1,Ccr2,B3gnt2,Mapk3,Gpx1	sensory perception	0.732926
GO:0045216	1.21501	0.575283	59	4	Cdh1,Jup,Macf1,Cd9	cell-cell junction organization	0.732926
GO:0070613	1.21501	0.575283	59	4	Plgrkt,C3,Adam8,Plk1	regulation of protein processing	0.732926
GO:0055002	1.19309	0.581685	60	4	Itgb1,Lmna,Actg1,Gpx1	striated muscle cell development	0.732926
GO:0071407	1.19309	0.581685	60	4	Ccl3,Hsp90b1,Rest,Akap13	cellular response to organic cyclic compound	0.732926
GO:0001829	1.19126	0.583136	15	1	Cdh1	trophectodermal cell differentiation	0.732926
GO:0001895	1.19126	0.583136	15	1	Mkks	retina homeostasis	0.732926
GO:0001938	1.19126	0.583136	15	1	Aggf1	positive regulation of endothelial cell proliferation	0.732926
GO:0006405	1.19126	0.583136	15	1	Npm1	RNA export from nucleus	0.732926
GO:0006885	1.19126	0.583136	15	1	Slc11a1	regulation of pH	0.732926
GO:0007091	1.19126	0.583136	15	1	Plk1	mitotic metaphase/anaphase transition	0.732926
GO:0007143	1.19126	0.583136	15	1	Cdc25b	female meiosis	0.732926
GO:0008038	1.19126	0.583136	15	1	App	neuron recognition	0.732926
GO:0010259	1.19126	0.583136	15	1	Ctsl	multicellular organismal aging	0.732926
GO:0014003	1.19126	0.583136	15	1	Id2	oligodendrocyte development	0.732926
GO:0016601	1.19126	0.583136	15	1	Wasf2	Rac protein signal transduction	0.732926
GO:0032963	1.19126	0.583136	15	1	Id1	collagen metabolic process	0.732926
GO:0033081	1.19126	0.583136	15	1	Adam8	regulation of T cell differentiation in thymus	0.732926
GO:0035088	1.19126	0.583136	15	1	Ezr	establishment or maintenance of apical/basal cell polarity	0.732926
GO:0042752	1.19126	0.583136	15	1	Id2	regulation of circadian rhythm	0.732926
GO:0042771	1.19126	0.583136	15	1	Nupr1	intrinsic apoptotic signaling pathway in response to DNA damage by p53 class mediator	0.732926
GO:0043330	1.19126	0.583136	15	1	Mapk3	response to exogenous dsRNA	0.732926
GO:0045600	1.19126	0.583136	15	1	Id2	positive regulation of fat cell differentiation	0.732926
GO:0046164	1.19126	0.583136	15	1	Apoe	alcohol catabolic process	0.732926
GO:0046633	1.19126	0.583136	15	1	Ccr2	alpha-beta T cell proliferation	0.732926
GO:0048265	1.19126	0.583136	15	1	Prkcg	response to pain	0.732926
GO:0051055	1.19126	0.583136	15	1	Rest	negative regulation of lipid biosynthetic process	0.732926
GO:0051289	1.19126	0.583136	15	1	Aldoa	protein homotetramerization	0.732926
GO:0070059	1.19126	0.583136	15	1	Ero1l	intrinsic apoptotic signaling pathway in response to endoplasmic reticulum stress	0.732926
GO:0010608	1.16271	0.595688	154	10	Rnf168,Mapkapk2,App,Slc11a1,Fam129a,Pycard,Flna,Ifi30,Rara,Id1	posttranscriptional regulation of gene expression	0.741274
GO:0008380	1.267	0.599837	71	5	Son,Sf3b1,Mbnl1,Wbp11,Npm1	RNA splicing	0.741274
GO:0003341	1.11165	0.606791	16	1	Mkks	cilium movement	0.741274
GO:0006414	1.11165	0.606791	16	1	Rnf168	translational elongation	0.741274
GO:0010092	1.11165	0.606791	16	1	Jup	specification of organ identity	0.741274
GO:0010594	1.11165	0.606791	16	1	Sema4a	regulation of endothelial cell migration	0.741274
GO:0015698	1.11165	0.606791	16	1	Slc11a1	inorganic anion transport	0.741274
GO:0030279	1.11165	0.606791	16	1	Nfe2	negative regulation of ossification	0.741274
GO:0034453	1.11165	0.606791	16	1	Nin	microtubule anchoring	0.741274
GO:0042307	1.11165	0.606791	16	1	Flna	positive regulation of protein import into nucleus	0.741274
GO:0042310	1.11165	0.606791	16	1	G6pdx	vasoconstriction	0.741274
GO:0043550	1.11165	0.606791	16	1	Lyn	regulation of lipid kinase activity	0.741274
GO:0044259	1.11165	0.606791	16	1	Id1	multicellular organismal macromolecule metabolic process	0.741274
GO:0046579	1.11165	0.606791	16	1	Rasgrp4	positive regulation of Ras protein signal transduction	0.741274
GO:0050974	1.11165	0.606791	16	1	Mkks	detection of mechanical stimulus involved in sensory perception	0.741274
GO:0051329	1.11165	0.606791	16	1	App	interphase of mitotic cell cycle	0.741274
GO:0051438	1.11165	0.606791	16	1	Plk1	regulation of ubiquitin-protein ligase activity	0.741274
GO:0060441	1.11165	0.606791	16	1	Ctsz	epithelial tube branching involved in lung morphogenesis	0.741274
GO:0060749	1.11165	0.606791	16	1	Id2	mammary gland alveolus development	0.741274
GO:0060997	1.11165	0.606791	16	1	Pdlim5	dendritic spine morphogenesis	0.741274
GO:0061377	1.11165	0.606791	16	1	Id2	mammary gland lobule development	0.741274
GO:0000226	1.16627	0.610483	169	11	Gabarap,Nin,Myh9,Son,Tpx2,Lmna,Plk1,Flna,Fes,Npm1,Espl1	microtubule cytoskeleton organization	0.74479
GO:0032535	1.19433	0.642595	90	6	Trpv2,Map3k1,Prkcd,Coro1a,Pycard,Lamtor4	regulation of cellular component size	0.782579
GO:0007338	1.45226	0.650011	25	2	B4galt1,Cd9	single fertilization	0.782579
GO:0008542	1.45226	0.650011	25	2	App,Atp1a3	visual learning	0.782579
GO:0015918	1.45226	0.650011	25	2	Apoe,Lrp1	sterol transport	0.782579
GO:0019218	1.45226	0.650011	25	2	Apoe,Rest	regulation of steroid metabolic process	0.782579
GO:0030301	1.45226	0.650011	25	2	Apoe,Lrp1	cholesterol transport	0.782579
GO:0034612	1.45226	0.650011	25	2	Tnfrsf1a,Wfdc21	response to tumor necrosis factor	0.782579
GO:0043589	1.45226	0.650011	25	2	Klf4,Plod3	skin morphogenesis	0.782579
GO:0046425	1.45226	0.650011	25	2	Csf1r,Lyn	regulation of JAK-STAT cascade	0.782579
GO:0048844	1.45226	0.650011	25	2	Apoe,Lrp1	artery morphogenesis	0.782579
GO:0006939	1.39151	0.656638	26	2	Ncf1,Adora2b	smooth muscle contraction	0.786558
GO:0007215	1.39151	0.656638	26	2	App,Atp1a3	glutamate receptor signaling pathway	0.786558
GO:0007632	1.39151	0.656638	26	2	App,Atp1a3	visual behavior	0.786558
GO:0006631	1.12616	0.657614	95	6	Ncf1,Cd74,Alox5,Tnfrsf1a,Alox5ap,Acot1	fatty acid metabolic process	0.786558
GO:0010638	1.12616	0.657614	95	6	Map3k1,Coro1a,Pycard,Plk1,Fes,Npm1	positive regulation of organelle organization	0.786558
GO:0017148	1.33562	0.663641	27	2	Rnf168,Rara	negative regulation of translation	0.787085
GO:0045669	1.33562	0.663641	27	2	Ifitm1,Cebpb	positive regulation of osteoblast differentiation	0.787085
GO:0051101	1.33562	0.663641	27	2	Id2,Id1	regulation of DNA binding	0.787085
GO:0051209	1.33562	0.663641	27	2	Ccl3,Ero1l	release of sequestered calcium ion into cytosol	0.787085
GO:0071241	1.33562	0.663641	27	2	Hmox1,Id2	cellular response to inorganic substance	0.787085
GO:0070997	1.2075	0.665074	104	7	Ccl3,Bcl2l1,App,Adam8,Gpx1,Bnip3,Prkcg	neuron death	0.787085
GO:0007626	1.19495	0.666586	105	7	Cstb,Eps8,App,Hexa,Ppt1,Aplp2,Atp1a3	locomotory behavior	0.787085
GO:0006200	1.28401	0.670957	28	2	Macf1,Atp6v1g1	ATP catabolic process	0.787085
GO:0007606	1.28401	0.670957	28	2	Mkks,B3gnt2	sensory perception of chemical stimulus	0.787085
GO:0010171	1.28401	0.670957	28	2	Sgpl1,Ankrd11	body morphogenesis	0.787085
GO:0010632	1.28401	0.670957	28	2	Sema4a,Macf1	regulation of epithelial cell migration	0.787085
GO:0016052	1.28401	0.670957	28	2	Gm2a,Pgd	carbohydrate catabolic process	0.787085
GO:0017156	1.28401	0.670957	28	2	B4galt1,Rest	calcium ion-dependent exocytosis	0.787085
GO:0060350	1.28401	0.670957	28	2	Rara,Thbs1	endochondral bone morphogenesis	0.787085
GO:0090316	1.28401	0.670957	28	2	Flna,Sfn	positive regulation of intracellular protein transport	0.787085
GO:0006576	1.23623	0.678528	29	2	Sat1,Fabp5	cellular biogenic amine metabolic process	0.787253
GO:0009612	1.23623	0.678528	29	2	Cnn2,Mkks	response to mechanical stimulus	0.787253
GO:0010469	1.23623	0.678528	29	2	App,Aplp2	regulation of receptor activity	0.787253
GO:0030307	1.23623	0.678528	29	2	Trpv2,Sfn	positive regulation of cell growth	0.787253
GO:0042158	1.23623	0.678528	29	2	Apoe,Pigq	lipoprotein biosynthetic process	0.787253
GO:0042632	1.23623	0.678528	29	2	Apoe,Ehd1	cholesterol homeostasis	0.787253
GO:0060322	1.23623	0.678528	29	2	Sgpl1,Ankrd11	head development	0.787253
GO:0060840	1.23623	0.678528	29	2	Apoe,Lrp1	artery development	0.787253
GO:0006820	1.12473	0.678845	111	7	Slc2a3,Anxa1,Slc11a1,Mpc2,Plin2,Slc2a1,Abca7	anion transport	0.787253
GO:0006986	1.19187	0.686302	30	2	Ero1l,Ptpn1	response to unfolded protein	0.787912
GO:0030177	1.19187	0.686302	30	2	Zeb2,Macf1	positive regulation of Wnt receptor signaling pathway	0.787912
GO:0045639	1.19187	0.686302	30	2	Id2,Fes	positive regulation of myeloid cell differentiation	0.787912
GO:0045862	1.19187	0.686302	30	2	Adam8,Plk1	positive regulation of proteolysis	0.787912
GO:0050684	1.19187	0.686302	30	2	Mbnl1,Npm1	regulation of mRNA processing	0.787912
GO:0050773	1.19187	0.686302	30	2	Pdlim5,Camk1d	regulation of dendrite development	0.787912
GO:0050821	1.19187	0.686302	30	2	Flna,Ifi30	protein stabilization	0.787912
GO:0055092	1.19187	0.686302	30	2	Apoe,Ehd1	sterol homeostasis	0.787912
GO:0006937	1.15056	0.694231	31	2	Ncf1,Adora2b	regulation of muscle contraction	0.792046
GO:0021766	1.15056	0.694231	31	2	Zeb2,Mkks	hippocampus development	0.792046
GO:0030101	1.15056	0.694231	31	2	Id2,Rab27a	natural killer cell activation	0.792046
GO:0031109	1.15056	0.694231	31	2	Nin,Fes	microtubule polymerization or depolymerization	0.792046
GO:0048477	1.15056	0.694231	31	2	Jup,Cdc25b	oogenesis	0.792046
GO:0009128	1.112	0.702273	32	2	Macf1,Atp6v1g1	purine nucleoside monophosphate catabolic process	0.795272
GO:0050672	1.112	0.702273	32	2	Ptpn6,Lyn	negative regulation of lymphocyte proliferation	0.795272
GO:0050803	1.112	0.702273	32	2	App,Pdlim5	regulation of synapse structure and activity	0.795272
GO:0051494	1.112	0.702273	32	2	Prkcd,Coro1a	negative regulation of cytoskeleton organization	0.795272
GO:0060401	1.112	0.702273	32	2	Ccl3,Ero1l	cytosolic calcium ion transport	0.795272
GO:0060402	1.112	0.702273	32	2	Ccl3,Ero1l	calcium ion transport into cytosol	0.795272
GO:0001708	1.0759	0.710389	33	2	Jup,Itgb1	cell fate specification	0.799516
GO:0006997	1.0759	0.710389	33	2	Lmna,Syne2	nucleus organization	0.799516
GO:0007416	1.0759	0.710389	33	2	App,Pdlim5	synapse assembly	0.799516
GO:0030888	1.0759	0.710389	33	2	Cdkn1a,Lyn	regulation of B cell proliferation	0.799516
GO:0070664	1.0759	0.710389	33	2	Ptpn6,Lyn	negative regulation of leukocyte proliferation	0.799516
GO:0007162	1.04213	0.718546	34	2	Prkcd,Myo1f	negative regulation of cell adhesion	0.803841
GO:0009187	1.04213	0.718546	34	2	Adora2b,Ptgir	cyclic nucleotide metabolic process	0.803841
GO:0030850	1.04213	0.718546	34	2	Psap,Cd44	prostate gland development	0.803841
GO:0046890	1.04213	0.718546	34	2	C3,Rest	regulation of lipid biosynthetic process	0.803841
GO:0006605	1.08966	0.718625	147	9	Ncf1,Cdkn1a,Myl12a,Slc11a1,Lmna,Macf1,Prdx1,Flna,Rab27a	protein targeting	0.803841
GO:0014706	1.13041	0.725183	158	10	Id2,Itgb1,Cenpf,Mbnl1,Lmna,Mylpf,Nupr1,Rara,Gpx1,Myl6	striated muscle tissue development	0.810187
GO:0060537	1.09239	0.730737	163	10	Id2,Itgb1,Cenpf,Mbnl1,Lmna,Mylpf,Nupr1,Rara,Gpx1,Myl6	muscle tissue development	0.813908
GO:0033365	1.07787	0.733562	165	10	Srgn,Cdkn1a,Slc11a1,Lmna,Macf1,Prdx1,Plk1,Flna,Lamtor4,Syne2	protein localization to organelle	0.813908
GO:0008286	1.25256	0.733852	43	3	Prkcd,Ptpn1,Ptpre	insulin receptor signaling pathway	0.813908
GO:0032609	1.25256	0.733852	43	3	Slc11a1,Pycard,Ccr2	interferon-gamma production	0.813908
GO:0042100	1.25256	0.733852	43	3	Prkcd,Cdkn1a,Lyn	B cell proliferation	0.813908
GO:0050868	1.25256	0.733852	43	3	Ptpn6,Tnfaip8l2,Cd74	negative regulation of T cell activation	0.813908
GO:0042594	1.22179	0.736979	44	3	Ctsd,Ctsl,Slc2a1	response to starvation	0.8154
GO:0090068	1.22179	0.736979	44	3	Id2,Plk1,Npm1	positive regulation of cell cycle process	0.8154
GO:0007033	1.19248	0.740348	45	3	Ctsd,Hexa,Ppt1	vacuole organization	0.817151
GO:0042306	1.19248	0.740348	45	3	Cdkn1a,Prdx1,Flna	regulation of protein import into nucleus	0.817151
GO:0009566	1.16453	0.743934	46	3	Bcl2l1,B4galt1,Cd9	fertilization	0.818793
GO:0050679	1.16453	0.743934	46	3	Aggf1,B4galt1,Grn	positive regulation of epithelial cell proliferation	0.818793
GO:0008654	1.13785	0.747718	47	3	Pigq,Fabp5,Abhd5	phospholipid biosynthetic process	0.818793
GO:0030073	1.13785	0.747718	47	3	Glud1,Il1rn,Rest	insulin secretion	0.818793
GO:0030336	1.13785	0.747718	47	3	Cnn2,Ifitm1,Lrp1	negative regulation of cell migration	0.818793
GO:0032319	1.13785	0.747718	47	3	Pycard,Plxnb2,Rhog	regulation of Rho GTPase activity	0.818793
GO:0000398	1.11235	0.751679	48	3	Sf3b1,Mbnl1,Npm1	mRNA splicing, via spliceosome	0.818793
GO:0031669	1.11235	0.751679	48	3	Ctsd,Ctsl,Slc2a1	cellular response to nutrient levels	0.818793
GO:0043491	1.11235	0.751679	48	3	Ccl3,Adam8,Gpx1	protein kinase B signaling cascade	0.818793
GO:0070507	1.11235	0.751679	48	3	Tpx2,Fes,Npm1	regulation of microtubule cytoskeleton organization	0.818793
GO:2000146	1.11235	0.751679	48	3	Cnn2,Ifitm1,Lrp1	negative regulation of cell motility	0.818793
GO:0000375	1.06466	0.760053	50	3	Sf3b1,Mbnl1,Npm1	RNA splicing, via transesterification reactions	0.823016
GO:0001666	1.06466	0.760053	50	3	Adam8,Lmna,Bnip3	response to hypoxia	0.823016
GO:0008217	1.06466	0.760053	50	3	Id2,Mkks,G6pdx	regulation of blood pressure	0.823016
GO:0008585	1.06466	0.760053	50	3	Bcl2l1,Sgpl1,Nupr1	female gonad development	0.823016
GO:0051271	1.06466	0.760053	50	3	Cnn2,Ifitm1,Lrp1	negative regulation of cellular component movement	0.823016
GO:0032320	1.04227	0.764431	51	3	Gdi2,Tbc1d2,Rhog	positive regulation of Ras GTPase activity	0.826778
GO:0031667	1.15152	0.778618	62	4	Ctsd,Ctsl,Mkks,Slc2a1	response to nutrient levels	0.834537
GO:0043281	1.15152	0.778618	62	4	Cdh1,Mical1,Rest,Pycard	regulation of cysteine-type endopeptidase activity involved in apoptotic process	0.834537
GO:0046631	1.15152	0.778618	62	4	Anxa1,Zbtb7b,Sema4a,Ccr2	alpha-beta T cell activation	0.834537
GO:0048469	1.15152	0.778618	62	4	Id2,App,Cdc25b,Klf2	cell maturation	0.834537
GO:0051091	1.15152	0.778618	62	4	Adam8,Camk1d,Nfam1,Irak2	positive regulation of sequence-specific DNA binding transcription factor activity	0.834537
GO:0001843	1.13179	0.780725	63	4	Enah,Zeb2,Traf6,Plxnb2	neural tube closure	0.834537
GO:0031668	1.13179	0.780725	63	4	Ctsd,Adora2b,Ctsl,Slc2a1	cellular response to extracellular stimulus	0.834537
GO:0046822	1.13179	0.780725	63	4	Cdkn1a,Prdx1,Flna,Sfn	regulation of nucleocytoplasmic transport	0.834537
GO:0050954	1.13179	0.780725	63	4	Cdh1,Hexa,Mkks,Gpx1	sensory perception of mechanical stimulus	0.834537
GO:0060606	1.13179	0.780725	63	4	Enah,Zeb2,Traf6,Plxnb2	tube closure	0.834537
GO:0097193	1.11271	0.782985	64	4	Ero1l,Nupr1,Gpx1,Bnip3	intrinsic apoptotic signaling pathway	0.835976
GO:0006936	1.0424	0.793335	68	4	Ncf1,Adora2b,Arg2,Myl6	muscle contraction	0.846039
GO:0072073	1.02616	0.796202	69	4	Cd44,Arg2,Iqgap1,Rara	kidney epithelium development	0.848108
GO:0007254	1.144	0.802454	78	5	Map3k1,Zeb2,Tirap,Trf,Aida	JNK cascade	0.853773
GO:0006469	1.11307	0.80509	80	5	Ptpn6,Hspb1,Cdkn1a,Lyn,Aida	negative regulation of protein kinase activity	0.855583
GO:0006874	1.08373	0.808198	82	5	Ccl3,Apoe,Ero1l,App,Ccr2	cellular calcium ion homeostasis	0.857721
GO:0030278	1.06969	0.809914	83	5	Id2,Ifitm1,Id1,Cebpb,Nfe2	regulation of ossification	0.857721
GO:0033673	1.06969	0.809914	83	5	Ptpn6,Hspb1,Cdkn1a,Lyn,Aida	negative regulation of kinase activity	0.857721
GO:0000209	1.05594	0.81173	84	5	Ube2c,Rnf168,Ube2w,Trip12,Traf6	protein polyubiquitination	0.858651
GO:0043523	1.02947	0.81564	86	5	Ccl3,Bcl2l1,Adam8,Gpx1,Prkcg	regulation of neuron apoptotic process	0.859805
GO:0051348	1.02947	0.81564	86	5	Ptpn6,Hspb1,Cdkn1a,Lyn,Aida	negative regulation of transferase activity	0.859805
GO:0055074	1.02947	0.81564	86	5	Ccl3,Apoe,Ero1l,App,Ccr2	calcium ion homeostasis	0.859805
GO:0007281	1.05386	0.827501	101	6	Jup,Bcl2l1,Mkks,Cdc25b,Rara,Aff4	germ cell development	0.871304
GO:0031589	1.04267	0.828898	102	6	Lims1,Adam8,Itgb1,Macf1,Sirpa,Thbs1	cell-substrate adhesion	0.871772
GO:0032870	1.03172	0.830371	103	6	Prkcd,Mkks,Ptpn1,Rest,Ptpre,Akap13	cellular response to hormone stimulus	0.872318
GO:0006873	1.03338	0.842024	120	7	Ccl3,Apoe,Ero1l,App,Slc11a1,Aplp2,Ccr2	cellular ion homeostasis	0.883545
GO:0016485	1.05137	0.84982	135	8	Plgrkt,Srgn,C3,Adam8,Furin,Pycard,Plk1,Vps35	protein processing	0.890555
GO:0032787	1.04295	0.85065	136	8	Ncf1,Cd74,P4hb,Alox5,Mpc2,Tnfrsf1a,Alox5ap,Acot1	monocarboxylic acid metabolic process	0.890555
GO:0007186	1.03569	0.859488	154	9	Adora2b,C3,Gal,Flna,Gnai2,Cish,Ptgir,Pik3r6,Atrnl1	G-protein coupled receptor signaling pathway	0.898779
GO:0045664	1.05	0.865151	169	10	Trpv2,Hmg20b,Id2,App,Vim,Pdlim5,Rest,Plxnb2,Camk1d,Fes	regulation of neuron differentiation	0.903668
GO:0044257	1.03727	0.872126	188	11	Ube2c,Ppp2cb,Rnf168,Hsp90b1,Bnip3l,Ube2w,Trip12,Ppt1,Edem1,Plk1,Bnip3	cellular protein catabolic process	0.909915
GO:0000045	1.042	1	17	1	Ctsd	autophagic vacuole assembly	1
GO:0000086	1.042	1	17	1	Plk1	G2/M transition of mitotic cell cycle	1
GO:0001659	1.042	1	17	1	Gpx1	temperature homeostasis	1
GO:0006090	1.042	1	17	1	Mpc2	pyruvate metabolic process	1
GO:0007623	1.01036	1	35	2	Id2,Setx	circadian rhythm	1
GO:0008637	1.01036	1	35	2	Bcl2l1,Map3k1	apoptotic mitochondrial changes	1
GO:0010975	1.01049	1	105	6	Trpv2,Vim,Pdlim5,Plxnb2,Camk1d,Fes	regulation of neuron projection development	1
GO:0014037	1.042	1	17	1	Ndrg1	Schwann cell differentiation	1
GO:0016049	1.00607	1	123	7	Trpv2,App,Rasgrp4,Ndufa13,Sbf1,Sfn,Npm1	cell growth	1
GO:0016050	1.01036	1	35	2	Srgn,Sort1	vesicle organization	1
GO:0016331	1.00019	1	106	6	Jup,Enah,Zeb2,Traf6,Plxnb2,Grsf1	morphogenesis of embryonic epithelium	1
GO:0021675	1.01036	1	35	2	Ctsl,Prkcg	nerve development	1
GO:0021772	1.042	1	17	1	Id2	olfactory bulb development	1
GO:0021846	1.042	1	17	1	Zeb2	cell proliferation in forebrain	1
GO:0030148	1.042	1	17	1	Cers6	sphingolipid biosynthetic process	1
GO:0030858	1.042	1	17	1	Btg1	positive regulation of epithelial cell differentiation	1
GO:0032024	1.042	1	17	1	Glud1	positive regulation of insulin secretion	1
GO:0035690	1.042	1	17	1	Rest	cellular response to drug	1
GO:0042551	1.042	1	17	1	App	neuron maturation	1
GO:0043161	1.01049	1	105	6	Ube2c,Ppp2cb,Hsp90b1,Ube2w,Edem1,Plk1	proteasomal ubiquitin-dependent protein catabolic process	1
GO:0045069	1.042	1	17	1	Ifitm1	regulation of viral genome replication	1
GO:0045104	1.042	1	17	1	Vim	intermediate filament cytoskeleton organization	1
GO:0045428	1.042	1	17	1	Tlr2	regulation of nitric oxide biosynthetic process	1
GO:0045787	1.01036	1	35	2	App,Plk1	positive regulation of cell cycle	1
GO:0046545	1.0208	1	52	3	Bcl2l1,Sgpl1,Nupr1	development of primary female sexual characteristics	1
GO:0048041	1.042	1	17	1	Macf1	focal adhesion assembly	1
GO:0048536	1.042	1	17	1	Adam17	spleen development	1
GO:0048566	1.042	1	17	1	Id2	embryonic digestive tract development	1
GO:0048873	1.042	1	17	1	Coro1a	homeostasis of number of cells within a tissue	1
GO:0050688	1.042	1	17	1	Pycard	regulation of defense response to virus	1
GO:0050796	1.01036	1	35	2	Glud1,Rest	regulation of insulin secretion	1
GO:0051604	1.01056	1	140	8	Plgrkt,Srgn,C3,Adam8,Furin,Pycard,Plk1,Vps35	protein maturation	1
GO:0051963	1.042	1	17	1	Pdlim5	regulation of synapse assembly	1
GO:0060325	1.042	1	17	1	Sgpl1	face morphogenesis	1
GO:0060612	1.042	1	17	1	Id2	adipose tissue development	1
GO:0060998	1.042	1	17	1	Pdlim5	regulation of dendritic spine development	1
GO:0072332	1.042	1	17	1	Nupr1	intrinsic apoptotic signaling pathway by p53 class mediator	1
GO:0090277	1.042	1	17	1	Glud1	positive regulation of peptide hormone secretion	1

## Sheet: 66h up hallmark
	odds.ratio	p.value	n.categoy	n.category.and.component	genes	FDR
HALLMARK_COAGULATION	3.10391	0.000136876	90	18	Apoc2,Mmp8,Sparc,Plek,F2rl2,Ctsb,C3,Anxa1,Capn2,Gsn,Cd9,Furin,F10,Thbs1,Lrp1,Apoc1,S100a13,Gda	0.00238293
HALLMARK_COMPLEMENT	2.57488	0.000192539	147	25	Mmp8,Ctsd,Ppp2cb,Plek,Ctsb,Prkcd,Pla2g7,C3,Ehd1,Anxa5,Ctsc,Itgam,F10,Gnai2,Ctss,Lrp1,Apoc1,Lyn,S100a13,Sh2b3,Plaur,Lgals3,Cebpb,Fcer1g,Rhog	0.00238293
HALLMARK_MTORC1_SIGNALING	2.30172	0.000230606	188	29	Itgb2,Cfp,Ifrd1,Slc2a3,Hsp90b1,Pno1,Rab1a,Actr2,Ccng1,Glrx,Ero1l,Sdf2l1,Cdkn1a,Idh1,Tuba4a,Actr3,Fam129a,Slc2a1,Prdx1,Slc6a6,Edem1,Cd9,Ctsc,Aldoa,Coro1a,Nupr1,Plk1,Gsr,Ifi30	0.00238293
HALLMARK_ALLOGRAFT_REJECTION	2.42083	0.000414483	148	24	Itgb2,Cfp,Spi1,Ptpn6,Srgn,Ly86,Cd74,Ccr1,Tpd52,Tlr2,Fgr,Flna,Igsf6,Degs1,Ctss,Lyn,Ccr2,Capg,Npm1,B2m,Ncf4,Prkcg,Ccr5,Rpl39	0.00314045
HALLMARK_APOPTOSIS	2.45443	0.000506525	140	23	Hspb1,Cd44,Hmox1,Bcl2l1,Bnip3l,App,Igfbp6,Cdkn1a,Anxa1,Sat1,Ifitm3,Gsn,Cdc25b,Casp6,Lmna,Ppt1,Gsr,Birc3,Rara,Mcl1,Tspo,Lgals3,Gpx1	0.00314045
HALLMARK_KRAS_SIGNALING_UP	2.16527	0.00248774	148	22	Itgb2,Jup,Klf4,Hsd11b1,Id2,Nin,Glrx,Map3k1,Ero1l,Lcp1,Adam8,Laptm5,Fuca1,Gpnmb,Birc3,Ctss,F13a1,Lat2,Plaur,Adam17,Fcer1g,Csf2ra	0.0123875
HALLMARK_HYPOXIA	2.07144	0.00279717	168	24	Klf6,S100a4,Slc2a3,Ndrg1,Hmox1,Adora2b,Glrx,Map3k1,Ero1l,Bnip3l,Myh9,Cdkn1a,Prdx5,Hexa,Tpd52,Casp6,Plin2,Slc2a1,Slc6a6,Aldoa,Anxa2,Tgfbi,Btg1,Plaur	0.0123875
HALLMARK_XENOBIOTIC_METABOLISM	2.02529	0.00693398	149	21	Jup,Apoe,Hmox1,Por,Ddah2,Hsd11b1,Id2,Slc35b1,Dhrs7,Arg2,Xdh,Idh1,Casp6,Pdlim5,Pgd,Slc6a6,Tnfrsf1a,F10,Gsr,Alas1,Blvrb	0.0268692
HALLMARK_TNFA_SIGNALING_VIA_NFKB	1.8946	0.0084794	173	23	Klf6,Klf4,Slc2a3,Nfat5,Cd44,Plek,Tnip1,Id2,Cdkn1a,Ehd1,Sat1,Tlr2,Pdlim5,B4galt1,Birc3,Btg1,Mcl1,Ptpre,Plaur,Klf2,Cebpb,Tnfaip8,Cebpd	0.0292068
HALLMARK_EPITHELIAL_MESENCHYMAL_TRANSITION	1.93096	0.012791	155	21	Plod3,Cd44,Sparc,Sdc1,Id2,Vcan,Sat1,Itgb1,Vim,Notch2,Fuca1,Flna,Tpm4,Tgfbi,Thbs1,Emp3,Lrp1,Plaur,Capg,Glipr1,Lgals1	0.039652
HALLMARK_APICAL_JUNCTION	1.85861	0.01476	160	21	Cdh1,Jup,Cnn2,Mvd,Vcan,Vcl,Myh9,Itgb1,Rsu1,Adam15,B4galt1,Actb,Cdk8,Zyx,Gnai2,Pbx2,Myl12b,Tgfbi,Sirpa,Atp1a3,Actg1	0.0415963
HALLMARK_IL6_JAK_STAT3_SIGNALING	2.18724	0.0243664	72	11	Il17ra,Cd44,Hmox1,Ccr1,Ptpn1,Tlr2,Ltbr,Tnfrsf1a,Cd9,Csf2ra,Csf2rb	0.0629466
HALLMARK_IL2_STAT5_SIGNALING	1.63952	0.0539619	169	20	Klf6,Slc2a3,Cd44,Ndrg1,Bcl2l1,Cd48,Ctsz,Mapkapk2,F2rl2,Plec,Ifitm3,Sell,Glipr2,Plin2,Furin,Cish,Rnh1,Ckap4,Capg,Ahnak	0.120111
HALLMARK_CHOLESTEROL_HOMEOSTASIS	2.04936	0.0542439	62	9	Mvd,Fam129a,Fabp5,Anxa5,S100a11,Cd9,Plaur,Lgals3,Actg1	0.120111
HALLMARK_UV_RESPONSE_UP	1.73831	0.0612428	128	16	Hmox1,Prkcd,Dgat1,Grina,Gal,Tuba4a,Olfm1,Ppt1,Furin,Aldoa,Rab27a,Alas1,Btg1,Creg1,Lyn,Ggh	0.126397
HALLMARK_P53_PATHWAY	1.57275	0.065237	184	21	Gm2a,S100a4,Klf4,Ndrg1,Hmox1,Ctsd,Ccng1,Sdc1,App,Cdkn1a,Sat1,Stom,Fuca1,Nupr1,Ifi30,Btg1,Plxnb2,Ptpre,S100a10,Sfn,H2afj	0.126397
HALLMARK_APICAL_SURFACE	2.21946	0.0978403	32	5	Hspb1,App,B4galt1,Lyn,Plaur	0.178415
HALLMARK_ANDROGEN_RESPONSE	1.70164	0.107244	89	11	Ndrg1,Iqgap2,Myl12a,Sat1,Tpd52,Pdlim5,B4galt1,Tmem50a,Gsr,B2m,Tnfaip8	0.184698
HALLMARK_REACTIVE_OXIGEN_SPECIES_PATHWAY	1.8932	0.150071	44	6	Mgst1,Lsp1,Glrx,Prdx1,Gsr,Fes	0.23745
HALLMARK_INFLAMMATORY_RESPONSE	1.48912	0.153194	146	16	Klf6,Cybb,Cd48,Adora2b,Cdkn1a,Ifitm1,Sell,Tlr2,Clec5a,Emp3,Ptpre,Lyn,Ptgir,Plaur,Irak2,Rhog	0.23745
HALLMARK_MITOTIC_SPINDLE	1.39273	0.168607	194	20	Kif5b,Nin,Vcl,Myh9,Tuba4a,Cenpf,Gsn,Tpx2,Notch2,Pdlim5,Capzb,Wasf2,Plk1,Flna,Anln,Ezr,Cntrl,Espl1,Sept9,Akap13	0.248896
HALLMARK_GLYCOLYSIS	1.32156	0.304616	172	17	Cd44,Ppp2cb,Adora2b,Sdc1,Pygl,Glrx,Vcan,Ero1l,Ndufv3,Slc16a3,Taldo1,Idh1,Casp6,B4galt1,Cenpa,Aldoa,Tgfbi	0.429232
HALLMARK_ANGIOGENESIS	1.5539	0.449983	26	3	S100a4,Vcan,App	0.583879
HALLMARK_HEME_METABOLISM	1.22323	0.452035	162	15	E2f2,Atp6v0a1,Nudt4,Ctsb,Bnip3l,Lrp10,C3,Riok3,Pigq,Slc2a1,Mkrn1,Sidt2,Blvrb,Tnrc6b,Nfe2	0.583879
HALLMARK_ESTROGEN_RESPONSE_LATE	1.17063	0.542533	157	14	Cdh1,Lsr,Klf4,Ptpn6,Cd44,Id2,Aldh3b1,Gal,Olfm1,Fabp5,Cd9,Cish,Blvrb,Sfn	0.672741
HALLMARK_ADIPOGENESIS	1.16765	0.56649	180	16	Apoe,Lpcat3,Por,Sqrdl,Dhrs7,Dgat1,C3,Riok3,Esyt1,Taldo1,Idh1,Stom,Plin2,G3bp2,Aldoa,Aplp2	0.675431
HALLMARK_TGF_BETA_SIGNALING	1.29535	0.593075	51	5	Cdh1,Id2,Furin,Thbs1,Id1	0.680938
HALLMARK_INTERFERON_ALPHA_RESPONSE	1.08104	0.835499	84	7	Cd74,Ifitm1,Ifitm3,Sell,Ifi30,B2m,Sp110	0.90621
HALLMARK_PI3K_AKT_MTOR_SIGNALING	1.05664	0.847745	98	8	Rps6ka1,Hsp90b1,Actr2,Cdkn1a,Actr3,Slc2a1,Tnfrsf1a,Sfn	0.90621
HALLMARK_INTERFERON_GAMMA_RESPONSE	1.03004	0.880913	163	13	Itgb7,Ptpn6,Cdkn1a,Cd74,Ifitm3,Ptpn1,Samhd1,Irf5,Ifi30,Btg1,B2m,Sp110,Csf2rb	0.910277
HALLMARK_MYOGENESIS	1.00444	1	141	11	Ifrd1,Ocel1,Sparc,Lsp1,Myh9,App,Cdkn1a,Itgb1,Gsn,Mylpf,Plxnb2	1

## Sheet: 114h up GO
	odds.ratio	p.value	n.categoy	n.category.and.component	genes	description	FDR
GO:0030595	6.48786	1.80374e-09	50	23	Itgb2,Ccl3,Myo9b,Pde4d,Nckap1l,Aif1,Cd74,Adam8,Spp1,Pf4,Itgam,Mpp1,Gas6,Slc37a4,Ccl12,Ccl2,C3ar1,Itga1,C5ar1,Cx3cr1,Fcer1g,Ptk2b,Fcgr3	leukocyte chemotaxis	1.98592e-06
GO:0060326	5.22269	1.63086e-08	59	24	Itgb2,Ccl3,Myo9b,Pde4d,Nckap1l,Aif1,Cd74,Adam8,Spp1,Pf4,Itgam,Mpp1,Gas6,Slc37a4,Ccl12,Ccl2,Dock4,C3ar1,Itga1,C5ar1,Cx3cr1,Fcer1g,Ptk2b,Fcgr3	cell chemotaxis	8.97788e-06
GO:0050900	4.0387	1.17641e-07	78	27	Itgb2,Ccl3,Myo9b,Pde4d,Nckap1l,Aif1,Cd74,Adam8,Tlr2,Ecm1,Spp1,Pf4,Itgam,Mpp1,Gas6,Slc37a4,Ccl12,Ccl2,C3ar1,Itga1,Selk,C5ar1,Plcb1,Cx3cr1,Fcer1g,Ptk2b,Fcgr3	leukocyte migration	4.31741e-05
GO:0006911	18.7425	3.43775e-07	14	10	Rac1,Cd36,Fcgr1,Nckap1l,Aif1,Fcgr2b,Sirpa,Fcer1g,Fcgr3,Clec7a	phagocytosis, engulfment	9.46241e-05
GO:0010324	14.9936	9.2155e-07	15	10	Rac1,Cd36,Fcgr1,Nckap1l,Aif1,Fcgr2b,Sirpa,Fcer1g,Fcgr3,Clec7a	membrane invagination	0.000171973
GO:0071621	6.65142	9.45464e-07	32	15	Itgb2,Ccl3,Pde4d,Nckap1l,Cd74,Spp1,Itgam,Mpp1,Slc37a4,Ccl2,C3ar1,Itga1,C5ar1,Fcer1g,Fcgr3	granulocyte chemotaxis	0.000171973
GO:0006897	2.69805	1.28448e-06	150	39	Rac1,Axl,Cd36,Calr,Clcn5,Coro1c,Mertk,Fcgr1,Pacsin2,Rab5c,Dab2,Nckap1l,App,Aif1,Npc1,Hras,Slc11a1,Fcgr2b,Mrc1,Stxbp1,Snx5,Cap1,Necap1,Myo7a,Gas6,Myo1e,Cd300a,Ccl2,Dennd1a,Sirpa,Hip1,Lrp1,Adrb2,Vamp8,Cd14,Fcer1g,Fcgr3,Hmgb1,Clec7a	endocytosis	0.000171973
GO:0030593	7.02665	1.40577e-06	29	14	Itgb2,Ccl3,Pde4d,Nckap1l,Cd74,Spp1,Itgam,Mpp1,Slc37a4,C3ar1,Itga1,C5ar1,Fcer1g,Fcgr3	neutrophil chemotaxis	0.000171973
GO:0048002	7.02665	1.40577e-06	29	14	Calr,Fcgr1,Cd74,March8,Slc11a1,Fcgr2b,Ifi30,Unc93b1,H2-DMa,Fcer1g,Fcgr3,H2-K1,H2-D1,H2-DMb1	antigen processing and presentation of peptide antigen	0.000171973
GO:0006909	4.09074	4.11347e-06	57	20	Rac1,Axl,Cd36,Calr,Coro1c,Mertk,Fcgr1,Nckap1l,Aif1,Slc11a1,Fcgr2b,Myo7a,Gas6,Ccl2,Sirpa,Lrp1,Fcer1g,Fcgr3,Hmgb1,Clec7a	phagocytosis	0.000452893
GO:0050766	6.43539	1.45545e-05	26	12	Cd36,Calr,Fcgr1,Nckap1l,Slc11a1,Fcgr2b,Gas6,Ccl2,Sirpa,Fcer1g,Fcgr3,Clec7a	positive regulation of phagocytosis	0.00145678
GO:0019882	4.70559	1.87951e-05	39	15	Calr,Fcgr1,Ap3d1,Cd74,March8,Slc11a1,Fcgr2b,Ifi30,Unc93b1,H2-DMa,Fcer1g,Fcgr3,H2-K1,H2-D1,H2-DMb1	antigen processing and presentation	0.00172445
GO:0002764	2.88924	2.07828e-05	98	27	Dusp3,Mef2c,Psen2,Fcgr1,Psen1,Prkch,Nckap1l,Pdpk1,Lpxn,Adam8,Irf7,Tlr2,Bcl10,Rps6ka3,Ctsh,Tlr13,Unc93b1,Tlr4,Lat2,Lyn,Rab7b,Nfam1,Fcer1g,Fcgr3,Arrb2,Ube2n,Clec7a	immune response-regulating signaling pathway	0.00176014
GO:0071241	6.00579	2.33898e-05	27	12	Hmox1,Mef2c,Id2,Fos,Mef2a,Mt1,Cebpa,Jun,Junb,Ryr3,Fabp4,Jund	cellular response to inorganic substance	0.00183944
GO:0002474	17.4167	2.85636e-05	10	7	Calr,Fcgr1,Ifi30,Fcer1g,Fcgr3,H2-K1,H2-D1	antigen processing and presentation of peptide antigen via MHC class I	0.00198512
GO:0072676	11.9564	2.88482e-05	13	8	Ccl3,Aif1,Adam8,Ecm1,Gas6,Ccl2,Selk,Ptk2b	lymphocyte migration	0.00198512
GO:0050764	4.88272	5.0634e-05	33	13	Cd36,Calr,Fcgr1,Nckap1l,Slc11a1,Fcgr2b,Gas6,Ccl2,Sirpa,Fcer1g,Fcgr3,Hmgb1,Clec7a	regulation of phagocytosis	0.00319912
GO:0045807	4.18063	5.23016e-05	42	15	Cd36,Calr,Fcgr1,Dab2,Nckap1l,Slc11a1,Fcgr2b,Gas6,Ccl2,Sirpa,Hip1,Cd14,Fcer1g,Fcgr3,Clec7a	positive regulation of endocytosis	0.00319912
GO:0019884	5.89082	5.78812e-05	25	11	Fcgr1,Ap3d1,Cd74,Fcgr2b,Ifi30,Unc93b1,H2-DMa,Fcer1g,Fcgr3,H2-K1,H2-DMb1	antigen processing and presentation of exogenous antigen	0.00335406
GO:0002687	6.24112	9.0545e-05	22	10	Ccl3,Nckap1l,Aif1,Cd74,Adam8,Tlr2,Ccl2,C3ar1,Selk,Ptk2b	positive regulation of leukocyte migration	0.0049845
GO:0043277	8.54	0.000115818	15	8	Rac1,Axl,Cd36,Mertk,Gas6,Ccl2,Lrp1,Hmgb1	apoptotic cell clearance	0.00607217
GO:0071277	10.4511	0.000151822	12	7	Mef2c,Fos,Mef2a,Jun,Junb,Ryr3,Jund	cellular response to calcium ion	0.00759798
GO:0030100	3.04847	0.000160694	66	19	Cd36,Calr,Fcgr1,Pacsin2,Rab5c,Dab2,Nckap1l,Slc11a1,Fcgr2b,Gas6,Ccl2,Sirpa,Hip1,Vamp8,Cd14,Fcer1g,Fcgr3,Hmgb1,Clec7a	regulation of endocytosis	0.00769237
GO:0002253	2.52525	0.000172613	104	26	Dusp3,Mef2c,Psen2,Psen1,Prkch,Nckap1l,Pdpk1,Lpxn,Adam8,Irf7,Tlr2,Bcl10,Rps6ka3,Tlr13,C1qa,Unc93b1,Tlr4,Nlrc4,Lat2,Lyn,Rab7b,Nfam1,Fcer1g,Arrb2,Ube2n,Clec7a	activation of immune response	0.00791861
GO:0030334	2.1421	0.000200906	164	36	Ccl3,Akt1,Rac1,Rhoa,Nisch,Dab2,Nckap1l,Ptk2,Pdpk1,Myo1f,Aif1,Cd74,Csf1r,Adam8,Srgap2,Tlr2,Lmna,Ecm1,Mpp1,Ctsh,Tgfbr2,Ptprm,Ccl2,Plxnb2,Rap2b,Rras,Lrp1,Ddx58,C3ar1,Lyn,Selk,Bst2,Plcb1,Rap2a,Ptk2b,Cxcl12	regulation of cell migration	0.00884788
GO:0002573	2.6801	0.000252254	84	22	Tfe3,Ccl3,Mef2c,Ctnnb1,Psen2,Psen1,Id2,Csf1r,Adam8,Fam20c,Casp8,Inpp5d,Itgam,Tgfbr2,Trf,Cebpa,Kdm1a,Lyn,Jun,Junb,Mapk14,Pirb	myeloid leukocyte differentiation	0.010682
GO:0007599	3.25236	0.00028814	53	16	Axl,Cd36,Prdx2,Mertk,Nfe2l2,Plek,Anxa7,Fermt3,F5,Pf4,Gas6,Tlr4,F13a1,Lyn,Entpd1,Fcer1g	hemostasis	0.0117497
GO:0002495	6.64048	0.000351561	17	8	Cd74,March8,Fcgr2b,Ifi30,Unc93b1,H2-DMa,Fcer1g,H2-DMb1	antigen processing and presentation of peptide antigen via MHC class II	0.0131057
GO:0001782	5.60841	0.000354789	21	9	Bax,Mef2c,Tnfrsf13b,Nckap1l,Cd74,Bcl2l11,Bcl10,Lyn,Pirb	B cell homeostasis	0.0131057
GO:0040012	2.02078	0.000357105	191	40	Ccl3,Akt1,Rac1,Rhoa,Nisch,Dab2,Nckap1l,Ptk2,Pdpk1,Myo1f,Aif1,Cd74,Csf1r,Adam8,Ifitm3,Nrp1,Srgap2,Tlr2,Lmna,Ecm1,Mpp1,Ctsh,Tgfbr2,Trf,Ptprm,Ccl2,Plxnb2,Rap2b,Rras,Lrp1,Ddx58,C3ar1,Lyn,Selk,Bst2,Plcb1,Rap2a,Ptk2b,Ifitm2,Cxcl12	regulation of locomotion	0.0131057
GO:2000401	11.1846	0.00038321	10	6	Ccl3,Aif1,Adam8,Ecm1,Selk,Ptk2b	regulation of lymphocyte migration	0.0136101
GO:0051270	1.98021	0.000405308	194	40	Ccl3,Akt1,Rac1,Rhoa,Nisch,Dab2,Nckap1l,Ptk2,Pdpk1,Myo1f,Aif1,Cd74,Csf1r,Adam8,Nrp1,Srgap2,Tlr2,Lmna,Ecm1,Pdpn,Mpp1,Ctsh,Tgfbr2,Trf,Ptprm,Ccl2,Plxnb2,Rap2b,Rras,Lrp1,Ddx58,C3ar1,Lyn,Selk,Bst2,Plcb1,Rap2a,Adam17,Ptk2b,Cxcl12	regulation of cellular component movement	0.0139451
GO:0050778	2.10607	0.000504797	152	33	Dusp3,Mef2c,Psen2,Fcgr1,Psen1,Prkch,Nckap1l,Pdpk1,Cd74,Lpxn,Adam8,Irf7,Slc11a1,Tlr2,Bcl10,Rps6ka3,Tlr13,C1qa,Unc93b1,H2-DMa,Tlr4,Nlrc4,Lat2,Lyn,Rab7b,Nfam1,Fcer1g,Fcgr3,Arrb2,H2-K1,H2-D1,Ube2n,Clec7a	positive regulation of immune response	0.016106
GO:0002690	7.46188	0.00053027	14	7	Ccl3,Nckap1l,Aif1,Cd74,Ccl2,C3ar1,Ptk2b	positive regulation of leukocyte chemotaxis	0.016106
GO:0019886	7.46188	0.00053027	14	7	Cd74,Fcgr2b,Ifi30,Unc93b1,H2-DMa,Fcer1g,H2-DMb1	antigen processing and presentation of exogenous peptide antigen via MHC class II	0.016106
GO:2000145	2.01113	0.000532542	177	37	Ccl3,Akt1,Rac1,Rhoa,Nisch,Dab2,Nckap1l,Ptk2,Pdpk1,Myo1f,Aif1,Cd74,Csf1r,Adam8,Srgap2,Tlr2,Lmna,Ecm1,Mpp1,Ctsh,Tgfbr2,Trf,Ptprm,Ccl2,Plxnb2,Rap2b,Rras,Lrp1,Ddx58,C3ar1,Lyn,Selk,Bst2,Plcb1,Rap2a,Ptk2b,Cxcl12	regulation of cell motility	0.016106
GO:0009617	2.0881	0.000541256	153	33	Ccl3,Cd36,Prdx2,Mef2c,Fcgr1,Pde4d,Litaf,Myo1f,Prdx3,Stat1,Slc11a1,Tnfrsf11a,Fcgr2b,Tlr2,Bcl10,Tnfrsf1a,Rps6ka3,Trib1,Ccl2,Tlr4,Rbpj,Nlrc4,Ptger3,Lyn,C5ar1,Cd14,Mapk14,Ptafr,Fcer1g,H2-K1,Lyz1,Lyz2,Naip2	response to bacterium	0.016106
GO:0010035	2.55495	0.000587144	87	22	Cd36,Prdx2,Hmox1,Mef2c,Crip1,Nfe2l2,Gpx3,Mapk9,Id2,Fos,Prdx3,Cat,Ppp3ca,Mef2a,Mt1,Cebpa,Jun,Junb,Rhob,Ryr3,Fabp4,Jund	response to inorganic substance	0.0170117
GO:0007596	3.04464	0.000758268	52	15	Axl,Cd36,Prdx2,Mertk,Nfe2l2,Plek,Fermt3,F5,Pf4,Gas6,Tlr4,F13a1,Lyn,Entpd1,Fcer1g	blood coagulation	0.0214065
GO:0002218	3.36142	0.000813006	42	13	Pdpk1,Adam8,Irf7,Tlr2,Rps6ka3,Tlr13,Unc93b1,Tlr4,Nlrc4,Lyn,Rab7b,Arrb2,Clec7a	activation of innate immune response	0.022378
GO:0045087	2.25988	0.000989217	113	26	Cdc37,Clec4n,Pdpk1,Myo1f,Aif1,Cd74,Adam8,Ifitm3,Irf7,Slc11a1,Tlr2,Bcl10,Clec5a,Rps6ka3,Tlr13,Gbp8,Ccl2,Unc93b1,Tlr4,Nlrc4,Ddx58,Lyn,Bst2,Rab7b,Arrb2,Clec7a	innate immune response	0.0263021
GO:0006935	1.96873	0.0010184	170	35	Itgb2,Ccl3,Rac1,Myo9b,Pde4d,Nckap1l,App,Aif1,Cd74,Adam8,Nrp1,Nrp2,Spp1,Pf4,Ptpro,Itgam,L1cam,Mpp1,Gas6,Slc37a4,Ptprm,Ccl12,Ccl2,Dock4,C3ar1,Itga1,Fpr1,C5ar1,Cx3cr1,Fcer1g,Ptk2b,Fcgr3,Cxcl12,Alkbh1,Fpr3	chemotaxis	0.0263021
GO:0002768	2.84127	0.00102724	62	17	Dusp3,Mef2c,Psen2,Fcgr1,Psen1,Prkch,Nckap1l,Lpxn,Tlr2,Bcl10,Lat2,Lyn,Nfam1,Fcer1g,Fcgr3,Ube2n,Clec7a	immune response-regulating cell surface receptor signaling pathway	0.0263021
GO:0008203	3.45826	0.00105314	38	12	Apoe,Insig2,Acadvl,Hmgcr,App,Abcg1,Soat1,Cat,Aplp2,Cebpa,Lrp1,Ch25h	cholesterol metabolic process	0.0263524
GO:0007040	4.48466	0.00113426	24	9	Naglu,Acp2,Hexb,Atp6v0c,Hexa,Cln8,Myo7a,Lamtor1,Tpp1	lysosome organization	0.0271483
GO:0015807	4.48466	0.00113426	24	9	Serinc1,Psen1,Slc7a8,Slc11a1,Sept2,Cln8,Arl6ip5,Slc38a7,Slc43a2	L-amino acid transport	0.0271483
GO:0001776	2.88736	0.00116641	54	15	Akt1,Bax,Mef2c,Tnfrsf13b,Nckap1l,Cd74,Slc40a1,Bcl2l11,Bcl10,Slc37a4,Ccl2,Lyn,Adam17,Fcer1g,Pirb	leukocyte homeostasis	0.0273237
GO:0050878	2.3456	0.00120533	97	23	Cdh1,Axl,Cd36,Prdx2,Mertk,Nfe2l2,Plek,Anxa7,Fermt3,Creb1,F5,Pf4,Ptpro,Gas6,Tlr4,F13a1,Ptger3,Lyn,Entpd1,Kcnn4,Usf2,Fcer1g,Ccnd1	regulation of body fluid levels	0.0276473
GO:0060627	2.15869	0.00130312	117	26	Cd36,Calr,Map2k1,Napa,Fcgr1,Pacsin2,Rab5c,Dab2,Nckap1l,Pdpk1,Slc11a1,Fcgr2b,Stxbp1,Gas6,Cd300a,Ccl2,Sirpa,Hip1,Lyn,Vamp8,Plcb1,Cd14,Fcer1g,Fcgr3,Hmgb1,Clec7a	regulation of vesicle-mediated transport	0.0289042
GO:0051050	1.87512	0.00135307	192	38	Ccl3,Akt1,Cd36,Calr,Bax,Prkaca,Fcgr1,Trpv2,Igf1,Dab2,Nckap1l,Clec4n,Abcg1,Rbm22,Creb1,Slc11a1,Tnfrsf11a,Fcgr2b,Stxbp1,Serp1,Tlr2,Clec5a,Camk1,Il4ra,Gas6,Ccl2,Sirpa,Hip1,Lrp1,AF251705,Orai1,Plcb1,Cd14,Mapk14,Kcnn4,Fcer1g,Fcgr3,Clec7a	positive regulation of transport	0.0289042
GO:0043297	7.45214	0.00136514	12	6	Cdh1,Rhoc,Rhoa,Prkch,Arl2,Ctnna1	apical junction assembly	0.0289042
GO:0045123	7.45214	0.00136514	12	6	Itgb2,Adam8,Itgam,Ccl2,Itga1,Plcb1	cellular extravasation	0.0289042
GO:0030099	1.93901	0.00143898	167	34	Tfe3,Ccl3,Dnase2a,Mef2c,Ctnnb1,Psen2,Psen1,Id2,Dab2,Nckap1l,Csf1r,Prdx3,Adam8,Fam20c,Casp8,Inpp5d,Pip4k2a,Pf4,Itgam,Tgfbr2,Trf,Lmo2,Cebpa,Kdm1a,Lyn,Leo1,Zfp36,Plcb1,Jun,Rab7b,Junb,Mapk14,Pirb,Hmgb1	myeloid cell differentiation	0.0298927
GO:0015918	4.20377	0.00158802	25	9	Cd36,Apoe,Vps4b,Npc2,Abcg1,Npc1,Msr1,Lamtor1,Lrp1	sterol transport	0.0311874
GO:0030301	4.20377	0.00158802	25	9	Cd36,Apoe,Vps4b,Npc2,Abcg1,Npc1,Msr1,Lamtor1,Lrp1	cholesterol transport	0.0311874
GO:0001525	1.9549	0.00159714	156	32	Acvrl1,Ramp2,Ctnnb1,Elk3,Rxra,Ptk2,Thbs2,Adam8,Nrp1,Casp8,Ecm1,Pf4,Flt1,Ctsh,Tgfbr2,Ptprm,Vhl,Ccl12,Ccl2,Btg1,Rras,Rbpj,Il18,Htatip2,Thbs1,C3ar1,Cx3cr1,Jun,Mapk14,Rhob,Ptk2b,Cxcl12	angiogenesis	0.0311874
GO:0016197	2.79538	0.0016146	59	16	Map2k1,Snx6,Cdc42,Vps4b,Vps26a,E430025E21Rik,Fam21,Rab14,Ehd4,Snx27,Vamp3,Mtm1,Arl4c,Rab7b,Rhob,Rab7	endosomal transport	0.0311874
GO:0007033	3.04477	0.00165837	45	13	Naglu,Acp2,Ctsd,Psen1,Hexb,Atg3,Atp6v0c,Hexa,Cln8,Myo7a,Lamtor1,Tpp1,Mtm1	vacuole organization	0.0312813
GO:0001817	1.88623	0.00167629	186	37	Ccl3,Axl,Cd36,Cd83,Nckap1l,Litaf,Ifnar1,Clec4n,Cd74,Adam8,Irf7,Hspd1,Slc11a1,Inpp5d,Fcgr2b,Tlr2,Bcl10,Clec5a,Il4ra,Gas6,Slc37a4,Ccl2,Tlr4,Il18,Ddx58,C3ar1,Lyn,Pglyrp3,Zfp36,AF251705,Bst2,Plcb1,Rab7b,Fcer1g,Fcgr3,Arrb2,Clec7a	regulation of cytokine production	0.0312813
GO:0016125	3.20961	0.00173654	40	12	Apoe,Insig2,Acadvl,Hmgcr,App,Abcg1,Soat1,Cat,Aplp2,Cebpa,Lrp1,Ch25h	sterol metabolic process	0.0318655
GO:0002367	4.59446	0.00190409	21	8	Cd36,Cd74,Slc11a1,Tlr2,Gas6,Tlr4,Bst2,Fcer1g	cytokine production involved in immune response	0.0339336
GO:0016042	2.83737	0.00191088	51	14	Gm2a,Apoe,Lpl,Acadvl,Ywhah,Eci2,Hexb,Hexa,Decr1,Gla,Abhd5,Abcd2,Hadhb,Bscl2	lipid catabolic process	0.0339336
GO:0051251	2.1815	0.00212875	107	24	Mef2c,Cd83,Ap3d1,Nckap1l,Cdkn1a,Aif1,Cd74,Adam8,Hspd1,Inpp5d,Bcl10,Il4ra,Il2rg,Gas6,Tgfbr2,Ccl2,H2-DMa,Cd81,Tlr4,Il18,Selk,Gpr183,Lgals8,Lgals1	positive regulation of lymphocyte activation	0.0372024
GO:0048520	3.95497	0.00217657	26	9	Ccl3,Mef2c,Nckap1l,Aif1,Cd74,Ccl2,C3ar1,Ptk2b,Cxcl12	positive regulation of behavior	0.0374438
GO:0061024	1.83221	0.00247912	185	36	Akt1,Rac1,Cd36,Bax,Etv5,Tsg101,Fcgr1,Ndel1,Ap3d1,Timm9,Dab2,Nckap1l,Aif1,Cln8,Tor1aip1,Fcgr2b,Lmna,Vamp3,Tpst2,Fgf13,Gas6,Folr2,Myo5a,Vat1,Oma1,Sh3glb1,Sirpa,Hip1,Sh3pxd2b,Mbp,Arf6,Myof,Kcnn4,Fcer1g,Fcgr3,Clec7a	membrane organization	0.0417591
GO:0042742	2.74544	0.0025412	56	15	Cd36,Fcgr1,Myo1f,Slc11a1,Tlr2,Tnfrsf1a,Tlr4,Rbpj,Nlrc4,C5ar1,Fcer1g,H2-K1,Lyz1,Lyz2,Naip2	defense response to bacterium	0.0417591
GO:0045765	2.74544	0.0025412	56	15	Ramp2,Thbs2,Ecm1,Pf4,Ctsh,Ptprm,Ccl2,Btg1,Rras,Htatip2,Thbs1,C3ar1,Cx3cr1,Rhob,Ptk2b	regulation of angiogenesis	0.0417591
GO:0048771	2.55555	0.00259603	63	16	Acvrl1,Axl,Bax,Mef2c,Ctnnb1,Igf1,Csf1r,Lipa,Adam8,Inpp5d,Tpp1,Trf,Rbpj,Pbrm1,Adrb2,Ptk2b	tissue remodeling	0.0420328
GO:0043524	2.61672	0.00316258	58	15	Dnajc5,Axl,Bax,Mef2c,Rhoa,Xrcc4,Itsn1,Adam8,Hras,Stxbp1,Nras,Mt1,Jun,Prkcg,Alkbh1	negative regulation of neuron apoptotic process	0.0501553
GO:0002237	2.11329	0.00332463	105	23	Ccl3,Cd36,Prdx2,Mef2c,Pde4d,Litaf,Prdx3,Stat1,Slc11a1,Tnfrsf11a,Fcgr2b,Tlr2,Bcl10,Rps6ka3,Trib1,Ccl2,Tlr4,Ptger3,Lyn,C5ar1,Cd14,Mapk14,Ptafr	response to molecule of bacterial origin	0.0501553
GO:0042100	2.89743	0.0034086	43	12	Bax,Mef2c,Tnfrsf13b,Nckap1l,Cdkn1a,Inpp5d,Fcgr2b,Cd81,Tlr4,Lyn,Shb,Gpr183	B cell proliferation	0.0501553
GO:0050663	2.89743	0.0034086	43	12	Ccl3,Lcp2,Clec4n,Tlr2,Clec5a,Il4ra,Gas6,Nlrp3,Rbpj,Nlrc4,Lyn,AF251705	cytokine secretion	0.0501553
GO:0051272	2.16469	0.00346284	94	21	Ccl3,Dab2,Nckap1l,Ptk2,Myo1f,Aif1,Cd74,Csf1r,Adam8,Tlr2,Pdpn,Ctsh,Tgfbr2,Trf,Ccl2,C3ar1,Lyn,Selk,Adam17,Ptk2b,Cxcl12	positive regulation of cellular component movement	0.0501553
GO:0002675	7.44259	0.00355324	10	5	Fcgr1,Adam8,Tnfrsf11a,Fcer1g,Fcgr3	positive regulation of acute inflammatory response	0.0501553
GO:0006910	7.44259	0.00355324	10	5	Cd36,Fcgr1,Sirpa,Fcgr3,Clec7a	phagocytosis, recognition	0.0501553
GO:0009124	7.44259	0.00355324	10	5	Adsl,Hprt,Atp5l,Pid1,Gm10221	nucleoside monophosphate biosynthetic process	0.0501553
GO:0051084	7.44259	0.00355324	10	5	Hspa8,Cd74,Sh3glb1,H2-DMa,H2-DMb1	'de novo' posttranslational protein folding	0.0501553
GO:0070301	7.44259	0.00355324	10	5	Prdx2,Gpx3,Prdx3,Cat,Rhob	cellular response to hydrogen peroxide	0.0501553
GO:0050921	3.97982	0.00369478	23	8	Ccl3,Nckap1l,Aif1,Cd74,Ccl2,C3ar1,Ptk2b,Cxcl12	positive regulation of chemotaxis	0.0507417
GO:0006631	2.13501	0.00381868	95	21	Insig2,Elovl1,Mid1ip1,Acadvl,Eci2,Hsd17b4,Cd74,Cyb5a,Adipor1,Decr1,Pdpn,Fam213b,Hpgds,Tnfrsf1a,Tecr,Elovl5,Myo5a,Acaa1a,Mapk14,Abcd2,Hadhb	fatty acid metabolic process	0.0507417
GO:0030888	3.2495	0.00382522	33	10	Mef2c,Tnfrsf13b,Nckap1l,Cdkn1a,Inpp5d,Fcgr2b,Cd81,Tlr4,Lyn,Gpr183	regulation of B cell proliferation	0.0507417
GO:0045834	3.2495	0.00382522	33	10	Rac1,Apoe,Cdc42,Mid1ip1,Abcg1,Creb1,Abhd5,Cd81,Lyn,Ptk2b	positive regulation of lipid metabolic process	0.0507417
GO:0050920	3.2495	0.00382522	33	10	Ccl3,Nckap1l,Aif1,Cd74,Nrp1,Mpp1,Ccl2,C3ar1,Ptk2b,Cxcl12	regulation of chemotaxis	0.0507417
GO:0051402	2.12352	0.00430617	100	22	Dnajc5,Ccl3,Axl,Bax,Mef2c,Rhoa,Psen1,Xrcc4,App,Itsn1,Tnfrsf21,Adam8,Hras,Stxbp1,Bcl2l11,Nras,Bag1,Mt1,Sigmar1,Jun,Prkcg,Alkbh1	neuron apoptotic process	0.0564415
GO:0006869	2.62303	0.00444727	54	14	Cd36,Apoe,Vps4b,Gltp,Npc2,Abcg1,Npc1,Msr1,Tnfrsf11a,Plin2,Lamtor1,Slco2a1,Lrp1,Kcnn4	lipid transport	0.0570339
GO:0006954	1.83331	0.00448233	164	32	Ccl3,Akt1,Axl,Apoe,Prdx2,Fcgr1,Sharpin,Pla2g7,Aif1,Lipa,Adam8,Slc11a1,Tnfrsf11a,Fcgr2b,Ecm1,Tnfrsf1b,Tnfrsf1a,Cd300a,Ccl12,Tlr4,Rbpj,Nlrc4,Ptger3,Thbs1,Lyn,Zfp36,Ptafr,Fcer1g,Fcgr3,Fabp4,Hmgb1,Naip2	inflammatory response	0.0570339
GO:0032680	2.93786	0.004555	39	11	Ccl3,Axl,Cd36,Tlr2,Gas6,Tlr4,Zfp36,Fcer1g,Fcgr3,Arrb2,Clec7a	regulation of tumor necrosis factor production	0.0570339
GO:0030193	4.34967	0.00455857	19	7	Cd36,Prdx2,Nfe2l2,Plek,Tlr4,Lyn,Fcer1g	regulation of blood coagulation	0.0570339
GO:0034614	3.73086	0.00497503	24	8	Cd36,Prdx2,Nfe2l2,Gpx3,Prdx3,Cat,Rhob,Romo1	cellular response to reactive oxygen species	0.0601543
GO:0045453	3.73086	0.00497503	24	8	Ctnnb1,Csf1r,Adam8,Inpp5d,Tpp1,Trf,Adrb2,Ptk2b	bone resorption	0.0601543
GO:0071219	2.55864	0.00500237	55	14	Ccl3,Cd36,Prdx2,Mef2c,Pde4d,Litaf,Stat1,Fcgr2b,Tlr2,Ccl2,Tlr4,Lyn,Mapk14,Ptafr	cellular response to molecule of bacterial origin	0.0601543
GO:0030168	3.36004	0.00502652	29	9	Axl,Mertk,Plek,Fermt3,Pf4,Tlr4,Lyn,Entpd1,Fcer1g	platelet activation	0.0601543
GO:0032760	4.96605	0.00539818	15	6	Ccl3,Cd36,Tlr2,Tlr4,Fcer1g,Clec7a	positive regulation of tumor necrosis factor production	0.0639074
GO:0019221	2.1964	0.00558231	84	19	Klf6,Cdc37,Sharpin,Cd74,Ifitm3,Irf7,Stat1,Tnfrsf11a,Ecm1,Jak1,Tnfrsf1b,Pf4,Tnfrsf1a,Gas6,Fkbp1a,Plcb1,Cx3cr1,Pirb,Ptk2b	cytokine-mediated signaling pathway	0.06518
GO:0044242	2.836	0.00562407	40	11	Gm2a,Lpl,Acadvl,Eci2,Hexb,Hexa,Decr1,Gla,Abhd5,Abcd2,Hadhb	cellular lipid catabolic process	0.06518
GO:0070997	2.01833	0.00568543	104	22	Dnajc5,Ccl3,Axl,Bax,Mef2c,Rhoa,Psen1,Xrcc4,App,Itsn1,Tnfrsf21,Adam8,Hras,Stxbp1,Bcl2l11,Nras,Bag1,Mt1,Sigmar1,Jun,Prkcg,Alkbh1	neuron death	0.0652048
GO:0033209	6.20127	0.0058822	11	5	Sharpin,Tnfrsf11a,Tnfrsf1b,Tnfrsf1a,Gas6	tumor necrosis factor-mediated signaling pathway	0.0660847
GO:0048820	6.20127	0.0058822	11	5	Akt1,Psen2,Psen1,Myo5a,Rbpj	hair follicle maturation	0.0660847
GO:0008202	2.23779	0.00607414	74	17	Apoe,Insig2,Acadvl,Ywhah,Sgpl1,Hmgcr,App,Abcg1,Soat1,Cat,Lamtor1,Aplp2,Slc37a4,Cebpa,Stub1,Lrp1,Ch25h	steroid metabolic process	0.0667084
GO:0032943	1.96259	0.00628373	121	25	Itgb2,Impdh1,Bax,Prdx2,Mef2c,Ctnnb1,Tnfrsf13b,Nckap1l,Cdkn1a,Aif1,Hprt,Slc11a1,Inpp5d,Fcgr2b,Itgam,Psmb10,Fkbp1a,Cd81,Tlr4,Il18,Lyn,Selk,Shb,Gpr183,Cxcl12	mononuclear cell proliferation	0.0667084
GO:0046651	1.96259	0.00628373	121	25	Itgb2,Impdh1,Bax,Prdx2,Mef2c,Ctnnb1,Tnfrsf13b,Nckap1l,Cdkn1a,Aif1,Hprt,Slc11a1,Inpp5d,Fcgr2b,Itgam,Psmb10,Fkbp1a,Cd81,Tlr4,Il18,Lyn,Selk,Shb,Gpr183,Cxcl12	lymphocyte proliferation	0.0667084
GO:0007043	4.01458	0.00630571	20	7	Cdh1,Rhoc,Rhoa,Prkch,Arl2,Ptpro,Ctnna1	cell-cell junction assembly	0.0667084
GO:0050853	4.01458	0.00630571	20	7	Mef2c,Prkch,Nckap1l,Lpxn,Lat2,Lyn,Nfam1	B cell receptor signaling pathway	0.0667084
GO:0071356	4.01458	0.00630571	20	7	Sharpin,Tnfrsf11a,Tnfrsf1b,Tnfrsf1a,Gas6,Ccl2,Pid1	cellular response to tumor necrosis factor	0.0667084
GO:0002366	2.12999	0.00647475	86	19	Ccl3,Psen2,Psen1,Xrcc4,Pdpk1,Myo1f,Slc11a1,Tyrobp,Il4ra,Cd300a,Lyn,Pglyrp3,Gpr183,Cx3cr1,Lgals8,Fcer1g,Ptk2b,Lgals1,Clec7a	leukocyte activation involved in immune response	0.0667084
GO:0043523	2.12999	0.00647475	86	19	Dnajc5,Ccl3,Axl,Bax,Mef2c,Rhoa,Xrcc4,Itsn1,Adam8,Hras,Stxbp1,Bcl2l11,Nras,Bag1,Mt1,Sigmar1,Jun,Prkcg,Alkbh1	regulation of neuron apoptotic process	0.0667084
GO:0045089	2.43855	0.00648302	57	14	Pdpk1,Cd74,Adam8,Irf7,Tlr2,Rps6ka3,Tlr13,Unc93b1,Tlr4,Nlrc4,Lyn,Rab7b,Arrb2,Clec7a	positive regulation of innate immune response	0.0667084
GO:0051592	3.51104	0.00656892	25	8	Mef2c,Fos,Ppp3ca,Mef2a,Jun,Junb,Ryr3,Jund	response to calcium ion	0.0669665
GO:0006665	2.74094	0.00688138	41	11	Gm2a,Bax,Elovl1,Cers2,Serinc1,Sptlc2,Hexb,Hexa,Gla,Pla2g15,Cerk	sphingolipid metabolic process	0.0695082
GO:0001819	2.09825	0.00705437	87	19	Ccl3,Cd36,Cd83,Ifnar1,Cd74,Adam8,Irf7,Hspd1,Slc11a1,Tlr2,Il4ra,Tlr4,Il18,Ddx58,C3ar1,Plcb1,Rab7b,Fcer1g,Clec7a	positive regulation of cytokine production	0.0706079
GO:0070661	1.8824	0.00758651	125	25	Itgb2,Impdh1,Bax,Prdx2,Mef2c,Ctnnb1,Tnfrsf13b,Nckap1l,Cdkn1a,Aif1,Hprt,Slc11a1,Inpp5d,Fcgr2b,Itgam,Psmb10,Fkbp1a,Cd81,Tlr4,Il18,Lyn,Selk,Shb,Gpr183,Cxcl12	leukocyte proliferation	0.07525
GO:0007034	4.4689	0.00778153	16	6	Snx27,Scarb2,Vps29,Mtm1,Hgsnat,Rhob	vacuolar transport	0.0758182
GO:0033344	4.4689	0.00778153	16	6	Apoe,Npc2,Abcg1,Npc1,Lamtor1,Lrp1	cholesterol efflux	0.0758182
GO:0001818	2.72077	0.00836533	45	12	Axl,Cd83,Nckap1l,Slc11a1,Fcgr2b,Tlr2,Gas6,Slc37a4,Tlr4,Pglyrp3,Bst2,Arrb2	negative regulation of cytokine production	0.0807915
GO:0045766	3.31494	0.00852108	26	8	Ramp2,Ecm1,Ctsh,Btg1,Rras,C3ar1,Rhob,Ptk2b	positive regulation of angiogenesis	0.0815337
GO:0001881	5.31469	0.00910867	12	5	Psen2,Psen1,Dab2,Vamp3,Lamtor1	receptor recycling	0.0815337
GO:0001893	5.31469	0.00910867	12	5	Akt1,Rxra,Ctsl,Prdx3,Junb	maternal placenta development	0.0815337
GO:0006693	5.31469	0.00910867	12	5	Cd74,Pdpn,Fam213b,Hpgds,Tnfrsf1a	prostaglandin metabolic process	0.0815337
GO:0015813	5.31469	0.00910867	12	5	Psen1,Sept2,Cln8,Arl6ip5,Slc38a7	L-glutamate transport	0.0815337
GO:0042147	5.31469	0.00910867	12	5	Snx6,Vps26a,Fam21,Vamp3,Rab7b	retrograde transport, endosome to Golgi	0.0815337
GO:0042743	5.31469	0.00910867	12	5	Prdx2,Cybb,Gpx3,Prdx3,Cat	hydrogen peroxide metabolic process	0.0815337
GO:0045648	5.31469	0.00910867	12	5	Id2,Nckap1l,Inpp5d,Kdm1a,Mapk14	positive regulation of erythrocyte differentiation	0.0815337
GO:0071622	5.31469	0.00910867	12	5	Nckap1l,Cd74,Mpp1,Ccl2,C3ar1	regulation of granulocyte chemotaxis	0.0815337
GO:0030316	2.7661	0.00927762	37	10	Tfe3,Ccl3,Ctnnb1,Csf1r,Adam8,Fam20c,Inpp5d,Trf,Junb,Mapk14	osteoclast differentiation	0.0823763
GO:0042060	2.0028	0.00967802	95	20	Axl,Cd36,Prdx2,Elk3,Mertk,Nfe2l2,Plek,Fermt3,Slc11a1,Fn1,F5,Pf4,Gas6,Tlr4,F13a1,Fgfr1op2,Lyn,Entpd1,Myof,Fcer1g	wound healing	0.085244
GO:0070371	2.37223	0.0102048	54	13	Ccl3,Dusp3,Dusp6,Igf1,Cd74,Csf1r,Ctsh,Trf,Tlr4,Lyn,Gpr183,Scimp,Ptk2b	ERK1 and ERK2 cascade	0.0891704
GO:0071345	1.84195	0.0107221	122	24	Klf6,Cdc37,Sharpin,Aif1,Cd74,Csf1r,Ifitm3,Irf7,Stat1,Tnfrsf11a,Ecm1,Jak1,Tnfrsf1b,Pf4,Tnfrsf1a,Gas6,Fkbp1a,Gbp8,Ccl2,Pid1,Plcb1,Cx3cr1,Pirb,Ptk2b	cellular response to cytokine stimulus	0.0929533
GO:0001974	3.478	0.0112233	22	7	Acvrl1,Axl,Bax,Mef2c,Igf1,Rbpj,Pbrm1	blood vessel remodeling	0.0957894
GO:0045646	3.478	0.0112233	22	7	Id2,Nckap1l,Inpp5d,Lmo2,Kdm1a,Lyn,Mapk14	regulation of erythrocyte differentiation	0.0957894
GO:0019216	2.12463	0.0114729	77	17	Rac1,Apoe,Insig2,Psap,Cdc42,Mid1ip1,Acadvl,Id2,Abcg1,Creb1,Lamtor1,Abhd5,Cd81,Stub1,Lyn,Ptk2b,Bscl2	regulation of lipid metabolic process	0.0964245
GO:0050870	2.12463	0.0114729	77	17	Cd83,Ap3d1,Nckap1l,Aif1,Cd74,Adam8,Hspd1,Bcl10,Il4ra,Il2rg,Tgfbr2,Ccl2,H2-DMa,Il18,Selk,Lgals8,Lgals1	positive regulation of T cell activation	0.0964245
GO:1901214	2.03749	0.0118746	89	19	Dnajc5,Ccl3,Axl,Bax,Mef2c,Rhoa,Xrcc4,Itsn1,Adam8,Hras,Stxbp1,Bcl2l11,Nras,Bag1,Mt1,Sigmar1,Jun,Prkcg,Alkbh1	regulation of neuron death	0.099045
GO:0002443	1.87968	0.0123171	115	23	Ccl3,Fcgr1,Xrcc4,Pdpk1,Myo1f,Cd74,Irf7,Slc11a1,Inpp5d,Fcgr2b,Bcl10,Ctsc,Ctsh,Cd300a,C1qa,H2-DMa,Lyn,Bst2,Fcer1g,Pirb,Fcgr3,H2-K1,H2-D1	leukocyte mediated immunity	0.101476
GO:2000147	2.00841	0.0124516	90	19	Ccl3,Dab2,Nckap1l,Ptk2,Myo1f,Aif1,Cd74,Csf1r,Adam8,Tlr2,Ctsh,Tgfbr2,Trf,Ccl2,C3ar1,Lyn,Selk,Ptk2b,Cxcl12	positive regulation of cell motility	0.101476
GO:0019724	2.42472	0.012465	49	12	Fcgr1,Xrcc4,Cd74,Irf7,Inpp5d,Fcgr2b,Bcl10,C1qa,H2-DMa,Fcer1g,Pirb,Fcgr3	B cell mediated immunity	0.101476
GO:0002224	2.79813	0.0125347	33	9	Pdpk1,Irf7,Tlr2,Rps6ka3,Tlr13,Unc93b1,Lyn,Rab7b,Arrb2	toll-like receptor signaling pathway	0.101476
GO:0051258	2.15999	0.0126894	67	15	Rac1,Arpc2,Mid1ip1,Vdac2,Mtss1,Twf1,Nckap1l,Aif1,Arl2,Sept2,Mapre1,Mtpn,Fgf13,Gas7,Ptk2b	protein polymerization	0.101978
GO:0002260	2.65201	0.0131201	42	11	Akt1,Bax,Mef2c,Tnfrsf13b,Nckap1l,Cd74,Slc40a1,Bcl2l11,Bcl10,Lyn,Pirb	lymphocyte homeostasis	0.102468
GO:0007041	4.64983	0.0133752	13	5	Snx27,Scarb2,Mtm1,Hgsnat,Rhob	lysosomal transport	0.102468
GO:0030501	4.64983	0.0133752	13	5	Mef2c,Atraid,Fbn2,Fam20c,Adrb2	positive regulation of bone mineralization	0.102468
GO:0031529	4.64983	0.0133752	13	5	Rac1,Lima1,Aif1,Csf1r,Cyfip1	ruffle organization	0.102468
GO:0055012	4.64983	0.0133752	13	5	Mef2c,Rxra,Rarb,Lmna,Mef2a	ventricular cardiac muscle cell differentiation	0.102468
GO:0070373	4.64983	0.0133752	13	5	Dusp3,Dusp6,Igf1,Tlr4,Lyn	negative regulation of ERK1 and ERK2 cascade	0.102468
GO:0002460	1.90016	0.0135237	104	21	Mef2c,Fcgr1,Xrcc4,Cd74,Irf7,Slc11a1,Inpp5d,Fcgr2b,Bcl10,Ctsc,Il4ra,Ctsh,C1qa,H2-DMa,Il18,Adam17,Fcer1g,Pirb,Fcgr3,H2-K1,H2-D1	adaptive immune response based on somatic recombination of immune receptors built from immunoglobulin superfamily domains	0.102468
GO:0019915	2.98252	0.013681	28	8	Gm2a,Cd36,Hexb,Abcg1,Msr1,Hexa,Plin2,Abhd5	lipid storage	0.102468
GO:0030500	2.98252	0.013681	28	8	Mef2c,Atraid,Fbn2,Fam20c,Ecm1,Bmp2k,Adrb2,Ptk2b	regulation of bone mineralization	0.102468
GO:0051262	2.98252	0.013681	28	8	Insr,Gpx3,Pcbd2,Cbr2,Sbf2,Dcxr,Atpif1,Ryr3	protein tetramerization	0.102468
GO:0071222	2.36048	0.0140998	50	12	Ccl3,Cd36,Prdx2,Mef2c,Pde4d,Litaf,Stat1,Ccl2,Tlr4,Lyn,Mapk14,Ptafr	cellular response to lipopolysaccharide	0.104891
GO:0007229	3.25961	0.014517	23	7	Itgb2,Rhoa,Dab2,Ptk2,Tyrobp,Fcer1g,Ptk2b	integrin-mediated signaling pathway	0.106555
GO:0051897	3.25961	0.014517	23	7	Axl,Igf1,Ptk2,Itsn1,Adam8,Gas6,Arrb2	positive regulation of protein kinase B signaling cascade	0.106555
GO:0045088	2.14095	0.0152093	72	16	Cdc37,Pdpk1,Myo1f,Cd74,Adam8,Irf7,Tlr2,Rps6ka3,Tlr13,Unc93b1,Tlr4,Nlrc4,Lyn,Rab7b,Arrb2,Clec7a	regulation of innate immune response	0.110897
GO:0008360	2.2995	0.0160072	51	12	Gna12,Ccl3,Sept7,Epb41l2,Hexb,Anxa7,Parvb,Ptk2,Csf1r,Gas7,Plxnb2,Ptk2b	regulation of cell shape	0.115947
GO:0043623	1.78619	0.0166296	125	24	Rac1,Calr,Napa,Arpc2,Mid1ip1,Vdac2,Dab2,Mtss1,Twf1,Nckap1l,Cox14,Aif1,Arl2,Higd2a,Sept2,Mapre1,Rnf4,Mtpn,Fgf13,Gas7,Hip1,Taf10,Ptk2b,Vma21	cellular protein complex assembly	0.119046
GO:0033993	1.70681	0.0166513	157	29	Ccl3,Cd36,Prdx2,Mef2c,Ctnnb1,Ctsl,Pde4d,Litaf,Npc1,Prdx3,Stat1,Slc11a1,Tnfrsf11a,Scamp3,Rps6ka3,Adam9,Ctsh,Tgfbr2,Trib1,Ccl2,Ube2l3,Tlr4,Ptger3,Lyn,Pid1,Mapk14,Ptafr,Hmgb1,Naip2	response to lipid	0.119046
GO:0045637	2.06631	0.0168812	74	16	Tfe3,Ccl3,Mef2c,Ctnnb1,Id2,Nckap1l,Inpp5d,Pf4,Lmo2,Kdm1a,Lyn,Leo1,Zfp36,Rab7b,Mapk14,Hmgb1	regulation of myeloid cell differentiation	0.119608
GO:0006672	2.83996	0.0169779	29	8	Gm2a,Cers2,Sptlc2,Hexb,Hexa,Gla,Pla2g15,Cerk	ceramide metabolic process	0.119608
GO:0030335	1.98483	0.0170558	86	18	Ccl3,Dab2,Nckap1l,Ptk2,Myo1f,Aif1,Cd74,Csf1r,Adam8,Tlr2,Ctsh,Tgfbr2,Ccl2,C3ar1,Lyn,Selk,Ptk2b,Cxcl12	positive regulation of cell migration	0.119608
GO:0045621	2.41659	0.0174769	45	11	Cd83,Ap3d1,Nckap1l,Cd74,Adam8,Inpp5d,Il4ra,Il2rg,Gas6,Tgfbr2,H2-DMa	positive regulation of lymphocyte differentiation	0.12102
GO:0050795	2.41659	0.0174769	45	11	Ccl3,Mef2c,Nckap1l,Aif1,Cd74,Nrp1,Mpp1,Ccl2,C3ar1,Ptk2b,Cxcl12	regulation of behavior	0.12102
GO:0003158	3.06745	0.0184461	24	7	Acvrl1,Ctnnb1,Pde4d,Slc40a1,Btg1,Rbpj,Pbrm1	endothelium development	0.126144
GO:0061041	3.06745	0.0184461	24	7	Cd36,Prdx2,Nfe2l2,Plek,Tlr4,Lyn,Fcer1g	regulation of wound healing	0.126144
GO:0006687	4.13278	0.0188081	14	5	Gm2a,Bax,Hexb,Hexa,Gla	glycosphingolipid metabolic process	0.127825
GO:0001959	3.43534	0.0193157	19	6	Cdc37,Sharpin,Cd74,Irf7,Ecm1,Gas6	regulation of cytokine-mediated signaling pathway	0.128727
GO:0021795	3.43534	0.0193157	19	6	Rac1,Ndel1,Psen1,Srgap2,Fgf13,Cx3cr1	cerebral cortex cell migration	0.128727
GO:0034446	3.43534	0.0193157	19	6	Rac1,Axl,Arpc2,Mertk,Dab2,Vamp3	substrate adhesion-dependent cell spreading	0.128727
GO:0042493	2.26105	0.0194085	56	13	Mef2c,Fos,Nckap1l,Npc1,Creb1,Tlr2,Gclm,Gas6,Ptprm,Atp1a3,Adam17,Jun,Gstm1	response to drug	0.128727
GO:0006457	2.71036	0.02081	30	8	Pfdn2,Hspa8,Tuba1b,Cd74,Sh3glb1,H2-DMa,Stub1,H2-DMb1	protein folding	0.137196
GO:0016064	2.28138	0.0221148	47	11	Fcgr1,Xrcc4,Cd74,Irf7,Inpp5d,Fcgr2b,Bcl10,C1qa,H2-DMa,Fcer1g,Fcgr3	immunoglobulin mediated immune response	0.144073
GO:0070372	2.28138	0.0221148	47	11	Ccl3,Dusp3,Dusp6,Igf1,Cd74,Csf1r,Tlr4,Lyn,Gpr183,Scimp,Ptk2b	regulation of ERK1 and ERK2 cascade	0.144073
GO:0030258	2.48795	0.0224294	40	10	Apoe,Acadvl,Abcg1,Adipor1,Decr1,Lamtor1,Mtm1,Mapk14,Abcd2,Hadhb	lipid modification	0.144294
GO:0032787	1.69214	0.0225679	136	25	Insig2,Elovl1,Mid1ip1,Acadvl,P4ha1,Eci2,Hsd17b4,Cd74,Cyb5a,Adipor1,Aldh9a1,Decr1,Pdpn,Akr1a1,Fam213b,Hpgds,Tnfrsf1a,Tecr,Slc37a4,Elovl5,Myo5a,Acaa1a,Mapk14,Abcd2,Hadhb	monocarboxylic acid metabolic process	0.144294
GO:0040017	1.89984	0.0227073	94	19	Ccl3,Dab2,Nckap1l,Ptk2,Myo1f,Aif1,Cd74,Csf1r,Adam8,Tlr2,Ctsh,Tgfbr2,Trf,Ccl2,C3ar1,Lyn,Selk,Ptk2b,Cxcl12	positive regulation of locomotion	0.144294
GO:0034612	2.89649	0.0230649	25	7	Sharpin,Tnfrsf11a,Tnfrsf1b,Tnfrsf1a,Gas6,Ccl2,Pid1	response to tumor necrosis factor	0.144294
GO:0002438	4.95413	0.0231971	10	4	Fcgr1,Fcgr2b,Fcer1g,Fcgr3	acute inflammatory response to antigenic stimulus	0.144294
GO:0007176	4.95413	0.0231971	10	4	Psen2,Psen1,App,Aplp2	regulation of epidermal growth factor-activated receptor activity	0.144294
GO:0032722	4.95413	0.0231971	10	4	Cd74,Tlr2,Il4ra,Tlr4	positive regulation of chemokine production	0.144294
GO:0045730	4.95413	0.0231971	10	4	Prdx2,Slc11a1,Slc37a4,Selk	respiratory burst	0.144294
GO:0006164	2.40732	0.0247186	41	10	Impdh1,Adcy9,Adsl,Hprt,Adcy7,Atp5l,Pid1,Adrb2,Ptk2b,Gm10221	purine nucleotide biosynthetic process	0.150579
GO:0030890	3.18963	0.0248914	20	6	Mef2c,Nckap1l,Cdkn1a,Cd81,Tlr4,Gpr183	positive regulation of B cell proliferation	0.150579
GO:0045576	3.18963	0.0248914	20	6	Lcp2,Pdpk1,Cd300a,Lyn,Fcer1g,Fcgr3	mast cell activation	0.150579
GO:0060135	3.18963	0.0248914	20	6	Akt1,Rxra,Ube2a,Ctsl,Prdx3,Junb	maternal process involved in female pregnancy	0.150579
GO:0061097	3.18963	0.0248914	20	6	Psen2,Psen1,App,Gas6,Aplp2,Rap2b	regulation of protein tyrosine kinase activity	0.150579
GO:0050729	2.59203	0.0252172	31	8	Ccl3,Fcgr1,Adam8,Tnfrsf11a,Tnfrsf1a,Fcer1g,Fcgr3,Fabp4	positive regulation of inflammatory response	0.151021
GO:0009620	3.71852	0.0255131	15	5	Clec4n,Tlr2,Bcl10,Cotl1,Clec7a	response to fungus	0.151021
GO:0015992	3.71852	0.0255131	15	5	Atp6v0e,Atp6v1e1,Atp6v0b,Atp5l,Gm10221	proton transport	0.151021
GO:0051289	3.71852	0.0255131	15	5	Gpx3,Pcbd2,Dcxr,Atpif1,Ryr3	protein homotetramerization	0.151021
GO:0048872	1.64136	0.0272925	145	26	Akt1,Axl,Dnase2a,Bax,Prdx2,Mef2c,Tnfrsf13b,Id2,Nckap1l,Cd74,Lipa,Slc40a1,Inpp5d,Bcl2l11,Bcl10,Slc37a4,Lmo2,Ccl2,Kdm1a,Lyn,Atxn2,Plcb1,Adam17,Mapk14,Fcer1g,Pirb	homeostasis of number of cells	0.16069
GO:0050851	2.24158	0.0276341	52	12	Dusp3,Mef2c,Psen2,Psen1,Prkch,Nckap1l,Lpxn,Bcl10,Lat2,Lyn,Nfam1,Ube2n	antigen receptor-mediated signaling pathway	0.161836
GO:0042113	1.75637	0.0281862	116	22	Bax,Mef2c,Tnfrsf13b,Id2,Xrcc4,Nckap1l,Cdkn1a,Inpp5d,Fcgr2b,Il2rg,Cd81,Tlr4,Rbpj,Lat2,Lyn,Shb,Gpr183,Adam17,Lgals8,Nfam1,Ptk2b,Lgals1	B cell activation	0.164196
GO:0033619	2.97654	0.0314454	21	6	Psen2,Psen1,Adam8,Adam9,Ctsh,Adam17	membrane protein proteolysis	0.18032
GO:0034341	2.97654	0.0314454	21	6	Cdc37,Aif1,Slc11a1,Gbp8,Ccl2,Bst2	response to interferon-gamma	0.18032
GO:0042116	2.97654	0.0314454	21	6	Slc11a1,Tyrobp,Il4ra,Tlr4,Cx3cr1,Jun	macrophage activation	0.18032
GO:0032496	1.84694	0.0316983	91	18	Ccl3,Cd36,Prdx2,Mef2c,Pde4d,Litaf,Prdx3,Stat1,Slc11a1,Tnfrsf11a,Rps6ka3,Trib1,Ccl2,Tlr4,Ptger3,Lyn,Mapk14,Ptafr	response to lipopolysaccharide	0.180828
GO:0002699	2.01298	0.032325	66	14	Cd36,Fcgr1,Pdpk1,Cd74,Tlr2,Il4ra,Cd300a,Ccl2,Tlr4,Lyn,Fcer1g,Fcgr3,H2-K1,H2-D1	positive regulation of immune effector process	0.183452
GO:0009595	4.24608	0.0330913	11	4	Tlr4,Nlrc4,Naip2,Clec7a	detection of biotic stimulus	0.183899
GO:0043304	4.24608	0.0330913	11	4	Pdpk1,Cd300a,Lyn,Fcer1g	regulation of mast cell degranulation	0.183899
GO:0071526	4.24608	0.0330913	11	4	Nrp1,Nrp2,Plxna1,Plxnb2	semaphorin-plexin signaling pathway	0.183899
GO:0040013	2.08397	0.0334717	55	12	Nisch,Ifitm3,Nrp1,Srgap2,Ptprm,Rap2b,Rras,Lrp1,Bst2,Plcb1,Rap2a,Ifitm2	negative regulation of locomotion	0.183899
GO:0006970	3.37966	0.0335729	16	5	Rac1,Bax,Anxa7,Pdpk1,Tsc22d3	response to osmotic stress	0.183899
GO:0030219	3.37966	0.0335729	16	5	Mef2c,Pip4k2a,Pf4,Kdm1a,Rab7b	megakaryocyte differentiation	0.183899
GO:0043550	3.37966	0.0335729	16	5	Rac1,Cdc42,Cd81,Lyn,Ptk2b	regulation of lipid kinase activity	0.183899
GO:0002526	2.60587	0.0345645	27	7	Fcgr1,Adam8,Tnfrsf11a,Fcgr2b,Ptger3,Fcer1g,Fcgr3	acute inflammatory response	0.186076
GO:0021885	2.60587	0.0345645	27	7	Rac1,Axl,Ndel1,Psen1,Srgap2,Fgf13,Cx3cr1	forebrain cell migration	0.186076
GO:0045669	2.60587	0.0345645	27	7	Mef2c,Ctnnb1,Atraid,Fbn2,Fam20c,Cebpa,Jund	positive regulation of osteoblast differentiation	0.186076
GO:0001649	1.87026	0.0348153	80	16	Ccl3,Akt1,Mef2c,Ctnnb1,Atraid,Igf1,Id2,Ptk2,Fbn2,Fam20c,Clec5a,Cebpa,Fignl1,Tob1,Junb,Jund	osteoblast differentiation	0.186076
GO:0071396	1.87026	0.0348153	80	16	Ccl3,Cd36,Prdx2,Mef2c,Pde4d,Litaf,Npc1,Stat1,Ccl2,Ube2l3,Tlr4,Lyn,Pid1,Mapk14,Ptafr,Naip2	cellular response to lipid	0.186076
GO:0006633	2.39656	0.0353017	37	9	Insig2,Elovl1,Mid1ip1,Acadvl,Cd74,Fam213b,Tecr,Elovl5,Myo5a	fatty acid biosynthetic process	0.187764
GO:0006643	2.03622	0.0362684	56	12	Gm2a,Bax,Elovl1,Cers2,Serinc1,Sptlc2,Hexb,Hexa,Pgap2,Gla,Pla2g15,Cerk	membrane lipid metabolic process	0.191978
GO:0002683	1.7302	0.0372346	112	21	Axl,Dusp3,Prdx2,Tnfrsf13b,Mertk,Id2,Pdpk1,Cd74,Lpxn,Inpp5d,Fcgr2b,Il4ra,Cd300a,Lyn,Pglyrp3,Bst2,Plcb1,Rab7b,Socs6,Pcbp2,Arrb2	negative regulation of immune system process	0.19615
GO:0034097	1.61357	0.0377298	147	26	Klf6,Cdc37,Sharpin,Aif1,Cd74,Csf1r,Ifitm3,Irf7,Stat1,Slc11a1,Tnfrsf11a,Ecm1,Jak1,Tnfrsf1b,Pf4,Tnfrsf1a,Gas6,Fkbp1a,Gbp8,Ccl2,Pid1,Bst2,Plcb1,Cx3cr1,Pirb,Ptk2b	response to cytokine stimulus	0.197812
GO:0002250	1.71105	0.0382028	113	21	Mef2c,Fcgr1,Xrcc4,Cd74,Irf7,Slc11a1,Inpp5d,Fcgr2b,Bcl10,Ctsc,Il4ra,Ctsh,C1qa,H2-DMa,Il18,Adam17,Fcer1g,Pirb,Fcgr3,H2-K1,H2-D1	adaptive immune response	0.198938
GO:0032675	2.31348	0.0388672	38	9	Cd36,Nckap1l,Inpp5d,Tlr2,Gas6,Tlr4,Rab7b,Fcer1g,Arrb2	regulation of interleukin-6 production	0.198938
GO:0045582	2.31348	0.0388672	38	9	Cd83,Ap3d1,Nckap1l,Cd74,Adam8,Il4ra,Il2rg,Tgfbr2,H2-DMa	positive regulation of T cell differentiation	0.198938
GO:0019395	2.78999	0.0390287	22	6	Acadvl,Adipor1,Decr1,Mapk14,Abcd2,Hadhb	fatty acid oxidation	0.198938
GO:0045446	2.78999	0.0390287	22	6	Acvrl1,Ctnnb1,Pde4d,Btg1,Rbpj,Pbrm1	endothelial cell differentiation	0.198938
GO:0070979	2.78999	0.0390287	22	6	Ube2a,Anapc11,Rnf4,Anapc4,Ube2l3,Ube2h	protein K11-linked ubiquitination	0.198938
GO:0048871	1.7792	0.0396841	99	19	Bax,Ctnnb1,Ubc,Acadvl,Csf1r,Lipa,Adam8,Slc40a1,Slc11a1,Inpp5d,Cln8,Tnfrsf11a,Tpp1,Ctsh,Trf,Tlr4,Ptger3,Adrb2,Ptk2b	multicellular organismal homeostasis	0.201347
GO:0043410	1.65239	0.0405252	133	24	Ccl3,Cd36,Map2k1,Prdx2,Cdc42,Ctnnb1,Psen1,Dab2,Fgd4,Cd74,Csf1r,Adam8,Zeb2,Lamtor1,Trf,Nenf,Cd81,Tlr4,Adrb2,Plcb1,Gpr183,Scimp,Ptk2b,Dusp22	positive regulation of MAPK cascade	0.204671
GO:0070374	2.48122	0.0415256	28	7	Ccl3,Cd74,Csf1r,Tlr4,Gpr183,Scimp,Ptk2b	positive regulation of ERK1 and ERK2 cascade	0.208766
GO:0001783	3.09775	0.0430457	17	5	Bax,Cd74,Bcl2l11,Bcl10,Lyn	B cell apoptotic process	0.213484
GO:0006509	3.09775	0.0430457	17	5	Psen2,Psen1,Adam8,Adam9,Adam17	membrane protein ectodomain proteolysis	0.213484
GO:0045778	3.09775	0.0430457	17	5	Mef2c,Atraid,Fbn2,Fam20c,Adrb2	positive regulation of ossification	0.213484
GO:0051250	1.98186	0.0448206	62	13	Axl,Dusp3,Prdx2,Tnfrsf13b,Mertk,Id2,Cd74,Inpp5d,Fcgr2b,Il4ra,Lyn,Pglyrp3,Socs6	negative regulation of lymphocyte activation	0.213948
GO:0005975	1.52315	0.0449836	178	30	Gm2a,Akt1,Man2b1,Insr,Cs,Ube2g2,Mpdu1,Psen1,Igf1,Pofut2,Hexb,Dad1,St6gal1,Gsto1,Got1,Gusb,Atf3,Fabp5,Serp1,Akr1a1,Pgm2l1,Gla,Slc37a4,Dcxr,Tusc3,Ppp1ca,Gnpda1,Mapk14,Ptk2b,Hmgb1	carbohydrate metabolic process	0.213948
GO:0030225	3.71443	0.0450826	12	4	Id2,Casp8,Itgam,Cebpa	macrophage differentiation	0.213948
GO:0030865	3.71443	0.0450826	12	4	Calr,Coro1c,Actn1,Nckap1l	cortical cytoskeleton organization	0.213948
GO:0030889	3.71443	0.0450826	12	4	Tnfrsf13b,Inpp5d,Fcgr2b,Lyn	negative regulation of B cell proliferation	0.213948
GO:0034122	3.71443	0.0450826	12	4	Pdpk1,Lyn,Rab7b,Arrb2	negative regulation of toll-like receptor signaling pathway	0.213948
GO:0043372	3.71443	0.0450826	12	4	Cd83,Nckap1l,Il4ra,Il2rg	positive regulation of CD4-positive, alpha-beta T cell differentiation	0.213948
GO:0051291	3.71443	0.0450826	12	4	Insr,Ppp2ca,Pcbd2,Col1a2	protein heterooligomerization	0.213948
GO:0051351	3.71443	0.0450826	12	4	Mid1ip1,Gclm,Trib1,Ube2n	positive regulation of ligase activity	0.213948
GO:0051384	3.71443	0.0450826	12	4	Ctsl,Adam9,Ube2l3,Hmgb1	response to glucocorticoid stimulus	0.213948
GO:0043254	1.83797	0.0471359	76	15	Rac1,Bax,Napa,Arpc2,Rhoa,Ahr,Plek,Vdac2,Twf1,Nckap1l,Arl2,Mapre1,Rnf4,Mtpn,Ptk2b	regulation of protein complex assembly	0.216031
GO:0046849	2.48346	0.0473396	32	8	Ctnnb1,Csf1r,Adam8,Inpp5d,Tpp1,Trf,Adrb2,Ptk2b	bone remodeling	0.216031
GO:0051017	2.48346	0.0473396	32	8	Cdc42,Rhoa,Actn1,Eps8,Lcp1,Lima1,Aif1,Gas7	actin filament bundle assembly	0.216031
GO:0005977	2.6254	0.0476798	23	6	Akt1,Insr,Igf1,Slc37a4,Ppp1ca,Hmgb1	glycogen metabolic process	0.216031
GO:0006835	2.6254	0.0476798	23	6	Psen1,Sept2,Cln8,Folr2,Arl6ip5,Slc38a7	dicarboxylic acid transport	0.216031
GO:0016525	2.6254	0.0476798	23	6	Thbs2,Pf4,Ptprm,Ccl2,Thbs1,Cx3cr1	negative regulation of angiogenesis	0.216031
GO:0031663	2.6254	0.0476798	23	6	Ccl3,Prdx2,Stat1,Lyn,Mapk14,Ptafr	lipopolysaccharide-mediated signaling pathway	0.216031
GO:0045055	2.6254	0.0476798	23	6	Ccl3,Pdpk1,Myo1f,Cd300a,Lyn,Fcer1g	regulated secretory pathway	0.216031
GO:0046638	2.6254	0.0476798	23	6	Cd83,Ap3d1,Nckap1l,Il4ra,Il2rg,Tgfbr2	positive regulation of alpha-beta T cell differentiation	0.216031
GO:0048538	2.6254	0.0476798	23	6	Tyr,Prdx2,Ctnnb1,Psen2,Psen1,Bcl2l11	thymus development	0.216031
GO:0060038	2.6254	0.0476798	23	6	Mef2c,Ctnnb1,Rxra,Prkar1a,Sav1,Rbpj	cardiac muscle cell proliferation	0.216031
GO:0045619	1.80799	0.0493758	77	15	Prdx2,Cd83,Ap3d1,Id2,Nckap1l,Cd74,Adam8,Inpp5d,Il4ra,Il2rg,Gas6,Tgfbr2,H2-DMa,Pglyrp3,Nfam1	regulation of lymphocyte differentiation	0.222798
GO:0050707	2.38376	0.0509561	33	8	Ccl3,Clec4n,Tlr2,Clec5a,Il4ra,Gas6,Lyn,AF251705	regulation of cytokine secretion	0.228991
GO:0002244	2.09539	0.0536338	41	9	Mef2c,Psen2,Psen1,Xrcc4,Pip4k2a,Pf4,Slc37a4,Kdm1a,Rab7b	hematopoietic progenitor cell differentiation	0.238616
GO:0001779	2.85894	0.053965	18	5	Axl,Mertk,Id2,Gas6,Pglyrp3	natural killer cell differentiation	0.238616
GO:0033627	2.85894	0.053965	18	5	Nckap1l,Ptk2,Lpxn,Fermt3,L1cam	cell adhesion mediated by integrin	0.238616
GO:0061005	2.85894	0.053965	18	5	Mef2c,Ctnnb1,Ptpro,Myo1e,Basp1	cell differentiation involved in kidney development	0.238616
GO:0050885	2.29161	0.0554919	34	8	Gm2a,Hexb,App,Hexa,Cln8,Tpp1,Aplp2,Pcdh15	neuromuscular process controlling balance	0.244386
GO:0006112	2.47899	0.0574244	24	6	Akt1,Insr,Igf1,Slc37a4,Ppp1ca,Hmgb1	energy reserve metabolic process	0.248669
GO:0055010	2.47899	0.0574244	24	6	Ctnnb1,Rxra,Ly6e,Tpm1,Fkbp1a,Rbpj	ventricular cardiac muscle tissue morphogenesis	0.248669
GO:0051259	1.7589	0.0590018	84	16	Cdh1,Bax,Insr,Gpx3,Ppp2ca,Pcbd2,Cbr2,Ehd4,Bcl10,Col1a2,Hgsnat,Sbf2,Nlrc4,Dcxr,Atpif1,Ryr3	protein oligomerization	0.248669
GO:0006998	3.30104	0.0591748	13	4	Bax,Ndel1,Tor1aip1,Lmna	nuclear envelope organization	0.248669
GO:0009311	3.30104	0.0591748	13	4	Gm2a,Mpdu1,Hexb,Gla	oligosaccharide metabolic process	0.248669
GO:0010543	3.30104	0.0591748	13	4	Plek,Tlr4,Lyn,Fcer1g	regulation of platelet activation	0.248669
GO:0032272	3.30104	0.0591748	13	4	Vdac2,Twf1,Mapre1,Mtpn	negative regulation of protein polymerization	0.248669
GO:0033628	3.30104	0.0591748	13	4	Nckap1l,Ptk2,Lpxn,Fermt3	regulation of cell adhesion mediated by integrin	0.248669
GO:0043303	3.30104	0.0591748	13	4	Pdpk1,Cd300a,Lyn,Fcer1g	mast cell degranulation	0.248669
GO:0043552	3.30104	0.0591748	13	4	Rac1,Cdc42,Lyn,Ptk2b	positive regulation of phosphatidylinositol 3-kinase activity	0.248669
GO:0045124	3.30104	0.0591748	13	4	Csf1r,Adam8,Inpp5d,Trf	regulation of bone resorption	0.248669
GO:0071346	3.30104	0.0591748	13	4	Cdc37,Aif1,Gbp8,Ccl2	cellular response to interferon-gamma	0.248669
GO:0045638	2.20635	0.0609421	35	8	Ccl3,Ctnnb1,Inpp5d,Pf4,Lmo2,Lyn,Leo1,Zfp36	negative regulation of myeloid cell differentiation	0.25337
GO:0050871	2.20635	0.0609421	35	8	Mef2c,Nckap1l,Cdkn1a,Inpp5d,Il2rg,Cd81,Tlr4,Gpr183	positive regulation of B cell activation	0.25337
GO:0048738	1.73306	0.0609836	85	16	Mef2c,Cdc42,Ctnnb1,Rxra,Rarb,Prkar1a,Id2,Sav1,Ly6e,Lmna,Atg7,Mef2a,Sin3b,Tpm1,Fkbp1a,Rbpj	cardiac muscle tissue development	0.25337
GO:0021987	2.07099	0.0616366	46	10	Rac1,Bax,Ndel1,Psen1,Srgap2,Atg7,Fgf13,Plcb1,Cx3cr1,Tacc1	cerebral cortex development	0.25512
GO:0007568	1.94697	0.0621782	58	12	Calr,Id2,Ctsl,Pde4d,Hras,Inpp5d,Cln8,Serp1,Lmna,Romo1,Hmga1-rs1,Ifi27l2a	aging	0.256398
GO:0006873	1.5878	0.0632585	120	21	Ccl3,Apoe,Bax,Psen2,Atox1,Psen1,Micu1,Ap3d1,Hexb,Anxa7,App,Atp6v0c,Slc11a1,Mt1,Aplp2,Slc37a4,Nptn,Fkbp1a,Ptger3,Ryr3,Ptk2b	cellular ion homeostasis	0.259879
GO:0051222	1.90521	0.0646146	59	12	Ccl3,Prkaca,Clec4n,Rbm22,Tlr2,Clec5a,Camk1,Il4ra,Gas6,AF251705,Mapk14,Kcnn4	positive regulation of protein transport	0.264464
GO:0032436	2.65425	0.0663398	19	5	Akt1,Psen2,Psen1,Trib1,Stub1	positive regulation of proteasomal ubiquitin-dependent protein catabolic process	0.26657
GO:0042311	2.65425	0.0663398	19	5	Apoe,Rgs2,P2rx4,Ptprm,Adrb2	vasodilation	0.26657
GO:0043244	2.65425	0.0663398	19	5	Mid1ip1,Twf1,Lima1,Mtpn,Fgf13	regulation of protein complex disassembly	0.26657
GO:0050771	2.65425	0.0663398	19	5	Gdi1,Psen1,Ptk2,Nrp1,Fgf13	negative regulation of axonogenesis	0.26657
GO:2000377	2.65425	0.0663398	19	5	Cd36,Prdx2,Nfe2l2,Pid1,Romo1	regulation of reactive oxygen species metabolic process	0.26657
GO:0022604	1.53611	0.0691561	147	25	Gna12,Ccl3,Sept7,Arpc2,Ctnnb1,Gdi1,Trpv2,Ywhah,Psen1,Epb41l2,Pofut2,Hexb,Anxa7,Dab2,Parvb,Ptk2,Csf1r,Nrp1,Ngef,Fgf13,Ist1,Gas7,Plxnb2,Rap2a,Ptk2b	regulation of cell morphogenesis	0.274547
GO:0006865	1.96127	0.0695399	48	10	Serinc1,Psen1,Slc7a8,Slc11a1,Sept2,Cln8,Folr2,Arl6ip5,Slc38a7,Slc43a2	amino acid transport	0.274547
GO:0031214	1.96127	0.0695399	48	10	Mef2c,Atraid,Fbn2,Fam20c,Ecm1,Gas6,Bmp2k,Adrb2,Mmp13,Ptk2b	biomineral tissue development	0.274547
GO:0043491	1.96127	0.0695399	48	10	Ccl3,Akt1,Axl,Mertk,Igf1,Ptk2,Itsn1,Adam8,Gas6,Arrb2	protein kinase B signaling cascade	0.274547
GO:0009306	1.74177	0.0695718	74	14	Ccl3,Lcp2,Plek,Clec4n,Tlr2,Clec5a,Il4ra,Gas6,Nlrp3,Rbpj,Nlrc4,Lyn,AF251705,Kcnn4	protein secretion	0.274547
GO:0002902	2.9706	0.0753214	14	4	Bax,Cd74,Bcl10,Lyn	regulation of B cell apoptotic process	0.291645
GO:0031952	2.9706	0.0753214	14	4	Ppp2ca,Rap2b,Rap2a,Jun	regulation of protein autophosphorylation	0.291645
GO:0032613	2.9706	0.0753214	14	4	Cd83,Fcgr2b,Tlr4,Fcer1g	interleukin-10 production	0.291645
GO:0042058	2.9706	0.0753214	14	4	Psen2,Psen1,App,Aplp2	regulation of epidermal growth factor receptor signaling pathway	0.291645
GO:0050701	2.9706	0.0753214	14	4	Ccl3,Gas6,Nlrp3,Nlrc4	interleukin-1 secretion	0.291645
GO:0030183	1.78972	0.0754939	62	12	Bax,Id2,Nckap1l,Inpp5d,Il2rg,Rbpj,Gpr183,Adam17,Lgals8,Nfam1,Ptk2b,Lgals1	B cell differentiation	0.291645
GO:0042692	1.51102	0.0766826	155	26	Ramp2,Akt1,Mef2c,Ctnnb1,Med28,Rxra,Rarb,Prkar1a,Bin1,Hras,Capn2,Nras,Lmna,Ppp3ca,Ski,Camk1,Atg7,Mef2a,Kdm1a,Rbpj,Pbrm1,Plcb1,Mapk14,Ankrd17,Actg1,Lgals1	muscle cell differentiation	0.295201
GO:0006887	1.62842	0.0777338	95	17	Ccl3,Napa,Psen1,Plek,Scamp1,Pdpk1,Myo1f,Stxbp1,Snap23,Vamp3,Stx4a,Myo5a,Cd300a,Lyn,Plcb1,Gnpda1,Fcer1g	exocytosis	0.298205
GO:0030216	2.26474	0.0800893	30	7	Map2k1,Cdc42,Tsg101,Sav1,Prkch,Sharpin,Rbpj	keratinocyte differentiation	0.298891
GO:0045639	2.26474	0.0800893	30	7	Id2,Nckap1l,Inpp5d,Kdm1a,Rab7b,Mapk14,Hmgb1	positive regulation of myeloid cell differentiation	0.298891
GO:0045862	2.26474	0.0800893	30	7	Akt1,Psen2,Psen1,Adam8,Adam9,Trib1,Stub1	positive regulation of proteolysis	0.298891
GO:0032006	2.47677	0.0801559	20	5	Ubr2,Lamtor1,Gas6,Lamtor5,Lamtor3	regulation of TOR signaling cascade	0.298891
GO:0032615	2.47677	0.0801559	20	5	Cd36,Tlr2,Tlr4,Plcb1,Arrb2	interleukin-12 production	0.298891
GO:0032729	2.47677	0.0801559	20	5	Ifnar1,Hspd1,Slc11a1,Tlr4,Il18	positive regulation of interferon-gamma production	0.298891
GO:0045577	2.47677	0.0801559	20	5	Id2,Nckap1l,Inpp5d,Il2rg,Nfam1	regulation of B cell differentiation	0.298891
GO:0045667	1.86236	0.0803558	50	10	Mef2c,Ctnnb1,Atraid,Id2,Ptk2,Fbn2,Fam20c,Cebpa,Tob1,Jund	regulation of osteoblast differentiation	0.298891
GO:0046034	1.86236	0.0803558	50	10	Sdhaf2,Dnajc10,Fignl1,Atp5l,Pid1,Tefm,Entpd1,Kif1b,Gm10221,Rnf213	ATP metabolic process	0.298891
GO:0007265	1.60748	0.0806634	96	17	Gna12,Myo9b,Map2k1,Rasa4,Cdc42,Rhoa,Nisch,Dok2,Aif1,Arhgdia,Hras,Nras,Sdcbp,Rasa3,Rap2b,Dgkz,Rap2a	Ras protein signal transduction	0.299025
GO:0006874	1.67138	0.0838559	82	15	Ccl3,Apoe,Bax,Psen2,Psen1,Micu1,Hexb,Anxa7,App,Slc37a4,Nptn,Fkbp1a,Ptger3,Ryr3,Ptk2b	cellular calcium ion homeostasis	0.309817
GO:0009165	1.90755	0.0862337	54	11	Impdh1,Adcy9,Rrm2b,Adsl,Hprt,Adcy7,Atp5l,Pid1,Adrb2,Ptk2b,Gm10221	nucleotide biosynthetic process	0.315221
GO:0010811	2.16992	0.0870144	31	7	Arpc2,Dab2,Arl2,Hsd17b12,Spp1,Thbs1,Ptk2b	positive regulation of cell-substrate adhesion	0.315221
GO:0006644	1.64647	0.0871336	83	15	Serinc1,Sptlc2,Hexb,Csf1r,Cln8,Fabp5,Pgap2,Mtm1,Abhd5,Lpcat2,Pip5k1c,Sh3glb1,Cd81,Plcb1,Pla2g16	phospholipid metabolic process	0.315221
GO:0030278	1.64647	0.0871336	83	15	Mef2c,Ctnnb1,Atraid,Id2,Ptk2,Fbn2,Fam20c,Ecm1,Bmp2k,Cebpa,Tob1,Rbpj,Adrb2,Ptk2b,Jund	regulation of ossification	0.315221
GO:0050890	1.64647	0.0871336	83	15	Gm2a,Man2b1,Mef2c,Psen2,Psen1,Vdac1,Hmgcr,App,Hras,Cln8,Nras,Fgf13,Tusc3,Atp1a3,Plcb1	cognition	0.315221
GO:0030282	2.03152	0.08725	42	9	Mef2c,Atraid,Fbn2,Fam20c,Ecm1,Bmp2k,Adrb2,Mmp13,Ptk2b	bone mineralization	0.315221
GO:0031589	1.60154	0.0873227	102	18	Rac1,Axl,Arpc2,Ctnnb1,Rhoa,Mertk,Dab2,Arl2,Adam8,Fn1,Hsd17b12,Bcl2l11,Vamp3,Spp1,Gas6,Sirpa,Thbs1,Ptk2b	cell-substrate adhesion	0.315221
GO:0008154	1.86367	0.0890582	55	11	Rac1,Arpc2,Evl,Mtss1,Twf1,Nckap1l,Lima1,Aif1,Mtpn,Gas7,Ptk2b	actin polymerization or depolymerization	0.319391
GO:0072593	1.86367	0.0890582	55	11	Cd36,Prdx2,Cybb,Nfe2l2,Gpx3,Prdx3,Cat,Sh3pxd2b,Pid1,Atpif1,Romo1	reactive oxygen species metabolic process	0.319391
GO:0007015	1.58238	0.0895633	103	18	Rac1,Arpc2,Cdc42,Rhoa,Actn1,Eps8,Evl,Lcp1,Mtss1,Twf1,Nckap1l,Lima1,Aif1,Trf,Gas7,Sirpa,Pcdh15,Ptk2b	actin filament organization	0.320156
GO:0050863	1.5249	0.0911107	124	21	Dusp3,Prdx2,Ctnnb1,Cd83,Ap3d1,Nckap1l,Aif1,Cd74,Adam8,Hspd1,Bcl10,Il4ra,Il2rg,Tgfbr2,Ccl2,H2-DMa,Il18,Selk,Socs6,Lgals8,Lgals1	regulation of T cell activation	0.320156
GO:0001894	1.70094	0.0929493	70	13	Bax,Ctnnb1,Csf1r,Lipa,Adam8,Inpp5d,Cln8,Tpp1,Ctsh,Trf,Tlr4,Adrb2,Ptk2b	tissue homeostasis	0.320156
GO:0001938	2.70007	0.0934335	15	4	Acvrl1,Pold4,Ecm1,Jun	positive regulation of endothelial cell proliferation	0.320156
GO:0006635	2.70007	0.0934335	15	4	Acadvl,Decr1,Abcd2,Hadhb	fatty acid beta-oxidation	0.320156
GO:0016601	2.70007	0.0934335	15	4	Nisch,Aif1,Hras,Nras	Rac protein signal transduction	0.320156
GO:0033003	2.70007	0.0934335	15	4	Pdpk1,Cd300a,Lyn,Fcer1g	regulation of mast cell activation	0.320156
GO:0033687	2.70007	0.0934335	15	4	Rhoa,Atraid,Fignl1,Junb	osteoblast proliferation	0.320156
GO:0045600	2.70007	0.0934335	15	4	Id2,Creb1,Cebpa,Sh3pxd2b	positive regulation of fat cell differentiation	0.320156
GO:0002262	1.65984	0.0940694	88	16	Axl,Dnase2a,Bax,Id2,Nckap1l,Inpp5d,Bcl2l11,Slc37a4,Lmo2,Ccl2,Kdm1a,Lyn,Plcb1,Adam17,Mapk14,Fcer1g	myeloid cell homeostasis	0.320156
GO:0006979	1.65984	0.0940694	88	16	Cd36,Apoe,Prdx2,Ndufs2,Nfe2l2,Gpx3,Psen1,Rrm2b,App,Prdx3,Cln8,Cat,Gclm,Txnip,Rhob,Romo1	response to oxidative stress	0.320156
GO:0001503	1.46012	0.0941947	147	24	Ccl3,Akt1,Mef2c,Ctnnb1,Rhoa,Atraid,Igf1,Id2,Ptk2,Fbn2,Fam20c,Tnfrsf11a,Ecm1,Clec5a,Bmp2k,Cebpa,Fignl1,Tob1,Rbpj,Adrb2,Mmp13,Junb,Ptk2b,Jund	ossification	0.320156
GO:0050714	2.08274	0.0951459	32	7	Ccl3,Clec4n,Tlr2,Clec5a,Il4ra,AF251705,Kcnn4	positive regulation of protein secretion	0.320156
GO:0009062	2.32161	0.095378	21	5	Acadvl,Eci2,Decr1,Abcd2,Hadhb	fatty acid catabolic process	0.320156
GO:0030968	2.32161	0.095378	21	5	Bax,Nfe2l2,Derl1,Serp1,Ccnd1	endoplasmic reticulum unfolded protein response	0.320156
GO:0032642	2.32161	0.095378	21	5	Cd74,Tlr2,Il4ra,Slc37a4,Tlr4	regulation of chemokine production	0.320156
GO:0032755	2.32161	0.095378	21	5	Cd36,Tlr2,Tlr4,Rab7b,Fcer1g	positive regulation of interleukin-6 production	0.320156
GO:0042542	2.32161	0.095378	21	5	Prdx2,Gpx3,Prdx3,Cat,Rhob	response to hydrogen peroxide	0.320156
GO:0046058	2.32161	0.095378	21	5	Adcy9,Timp2,Pde4d,Adcy7,Adrb2	cAMP metabolic process	0.320156
GO:0050869	2.32161	0.095378	21	5	Tnfrsf13b,Id2,Inpp5d,Fcgr2b,Lyn	negative regulation of B cell activation	0.320156
GO:2000107	2.32161	0.095378	21	5	Cd74,Bcl10,Gas6,Fcer1g,Ccr5	negative regulation of leukocyte apoptotic process	0.320156
GO:0043393	1.91476	0.0968042	44	9	Bax,Mef2c,Cdc42,Psen2,Psen1,App,Camk1,Aplp2,Adrb2	regulation of protein binding	0.323956
GO:0006875	1.56064	0.0995425	110	19	Ccl3,Apoe,Bax,Psen2,Atox1,Psen1,Micu1,Ap3d1,Hexb,Anxa7,App,Mt1,Aplp2,Slc37a4,Nptn,Fkbp1a,Ptger3,Ryr3,Ptk2b	cellular metal ion homeostasis	0.33211
GO:0055114	1.54337	0.101499	111	19	Akt1,Insr,Acadvl,Igf1,Sdha,Sdhaf2,Cbr2,Adipor1,Cat,Decr1,Slc37a4,Slc37a2,Ppp1ca,Sepw1,Mapk14,Abcd2,Hadhb,Hmgb1,Alkbh1	oxidation-reduction process	0.337024
GO:0035265	1.74372	0.102028	58	11	Mef2c,Ctnnb1,Rxra,Dusp6,Prkar1a,Sav1,Ly6e,Ptk2,Bcl2l11,Serp1,Rbpj	organ growth	0.337024
GO:0048545	2.00228	0.104444	33	7	Ctnnb1,Ctsl,Npc1,Adam9,Ube2l3,Hmgb1,Naip2	response to steroid hormone stimulus	0.337024
GO:0003300	3.17977	0.106525	10	3	Mef2c,Rgs2,Mtpn	cardiac muscle hypertrophy	0.337024
GO:0006695	3.17977	0.106525	10	3	Insig2,Hmgcr,Abcg1	cholesterol biosynthetic process	0.337024
GO:0006900	3.17977	0.106525	10	3	Tsg101,Dab2,Hip1	membrane budding	0.337024
GO:0008333	3.17977	0.106525	10	3	Snx27,Mtm1,Rhob	endosome to lysosome transport	0.337024
GO:0010874	3.17977	0.106525	10	3	Abcg1,Lamtor1,Lrp1	regulation of cholesterol efflux	0.337024
GO:0010907	3.17977	0.106525	10	3	Insr,Igf1,Hmgb1	positive regulation of glucose metabolic process	0.337024
GO:0030521	3.17977	0.106525	10	3	Rhoa,Igf1,Dnaja1	androgen receptor signaling pathway	0.337024
GO:0030866	3.17977	0.106525	10	3	Calr,Coro1c,Nckap1l	cortical actin cytoskeleton organization	0.337024
GO:0031649	3.17977	0.106525	10	3	Tnfrsf11a,Ptger3,Adrb2	heat generation	0.337024
GO:0042119	3.17977	0.106525	10	3	Myo1f,Tyrobp,Fcer1g	neutrophil activation	0.337024
GO:0045579	3.17977	0.106525	10	3	Nckap1l,Inpp5d,Il2rg	positive regulation of B cell differentiation	0.337024
GO:0045671	3.17977	0.106525	10	3	Ccl3,Ctnnb1,Inpp5d	negative regulation of osteoclast differentiation	0.337024
GO:0045762	3.17977	0.106525	10	3	Adcy9,Adcy7,Adrb2	positive regulation of adenylate cyclase activity	0.337024
GO:0060117	3.17977	0.106525	10	3	Rac1,Myo7a,Pcdh15	auditory receptor cell development	0.337024
GO:0060479	3.17977	0.106525	10	3	Ctnnb1,Igf1,Sav1	lung cell differentiation	0.337024
GO:0006470	1.65783	0.107437	77	14	Dusp3,Ppp2r1a,Dusp6,Ppp2ca,Nceh1,Ppp3ca,Eya3,Ptpro,Igbp1,Mtm1,Ptprm,Ppp1ca,Dusp7,Dusp22	protein dephosphorylation	0.338933
GO:0019218	2.34833	0.110011	25	6	Apoe,Insig2,Acadvl,Abcg1,Lamtor1,Stub1	regulation of steroid metabolic process	0.342965
GO:0022029	2.34833	0.110011	25	6	Rac1,Ndel1,Psen1,Srgap2,Fgf13,Cx3cr1	telencephalon cell migration	0.342965
GO:0050715	2.34833	0.110011	25	6	Ccl3,Clec4n,Tlr2,Clec5a,Il4ra,AF251705	positive regulation of cytokine secretion	0.342965
GO:0071230	2.34833	0.110011	25	6	Cdh1,Ubr2,Col1a2,Lamtor1,Lamtor5,Lamtor3	cellular response to amino acid stimulus	0.342965
GO:0007264	1.5256	0.111749	118	20	Gna12,Rac1,Myo9b,Map2k1,Rasa4,Cdc42,Rhoa,Nisch,Dok2,Itsn1,Aif1,Arhgdia,Hras,Nras,Sdcbp,Rasa3,Rap2b,Dgkz,Rap2a,Rap1b	small GTPase mediated signal transduction	0.342965
GO:0000188	2.47456	0.113387	16	4	Dusp3,Dusp6,Spred1,Dusp7	inactivation of MAPK activity	0.342965
GO:0002532	2.47456	0.113387	16	4	Prdx2,Cd300a,Tlr4,Fcer1g	production of molecular mediator involved in inflammatory response	0.342965
GO:0002762	2.47456	0.113387	16	4	Ccl3,Ctnnb1,Inpp5d,Lyn	negative regulation of myeloid leukocyte differentiation	0.342965
GO:0010883	2.47456	0.113387	16	4	Cd36,Abcg1,Msr1,Abhd5	regulation of lipid storage	0.342965
GO:0030279	2.47456	0.113387	16	4	Mef2c,Ecm1,Rbpj,Ptk2b	negative regulation of ossification	0.342965
GO:0033032	2.47456	0.113387	16	4	Mef2c,Adam17,Fcer1g,Ccr5	regulation of myeloid cell apoptotic process	0.342965
GO:0046850	2.47456	0.113387	16	4	Csf1r,Adam8,Inpp5d,Trf	regulation of bone remodeling	0.342965
GO:0051438	2.47456	0.113387	16	4	Psen2,Psen1,Trib1,Ube2n	regulation of ubiquitin-protein ligase activity	0.342965
GO:0097006	2.47456	0.113387	16	4	Cd36,Apoe,Abcg1,Msr1	regulation of plasma lipoprotein particle levels	0.342965
GO:2000108	2.47456	0.113387	16	4	Bax,Mef2c,Adam8,Lyn	positive regulation of leukocyte apoptotic process	0.342965
GO:0032649	1.9278	0.114865	34	7	Ifnar1,Hspd1,Slc11a1,Gas6,Tlr4,Il18,Pglyrp3	regulation of interferon-gamma production	0.346482
GO:0003229	2.23034	0.116975	26	6	Ctnnb1,Rxra,Ly6e,Tpm1,Fkbp1a,Rbpj	ventricular cardiac muscle tissue development	0.350925
GO:0007632	2.23034	0.116975	26	6	Hmgcr,App,Hras,Nras,Atp1a3,Dynlrb1	visual behavior	0.350925
GO:0030162	1.41297	0.126576	151	24	Cdh1,Akt1,Bax,Psen2,Atraid,Psen1,Ptk2,Adam8,Fn1,Serpinb8,Ecm1,Bcl10,Gas6,Adam9,Ctsh,Trib1,Nlrp3,Nlrc4,Stub1,Hip1,Ptk2b,Serpinb6a,Serpinb2,Serpinb10	regulation of proteolysis	0.378695
GO:0055074	1.57595	0.128227	86	15	Ccl3,Apoe,Bax,Psen2,Psen1,Micu1,Hexb,Anxa7,App,Slc37a4,Nptn,Fkbp1a,Ptger3,Ryr3,Ptk2b	calcium ion homeostasis	0.379647
GO:0006898	1.92027	0.128906	39	8	Fcgr1,Dab2,Mrc1,Cap1,Cd300a,Hip1,Lrp1,Adrb2	receptor-mediated endocytosis	0.379647
GO:0001711	2.78193	0.134063	11	3	Ctnnb1,Dusp6,Leo1	endodermal cell fate commitment	0.379647
GO:0019430	2.78193	0.134063	11	3	Cd36,Prdx2,Nfe2l2	removal of superoxide radicals	0.379647
GO:0021799	2.78193	0.134063	11	3	Rac1,Ndel1,Srgap2	cerebral cortex radially oriented cell migration	0.379647
GO:0021884	2.78193	0.134063	11	3	Rac1,Ubc,Atg7	forebrain neuron development	0.379647
GO:0030540	2.78193	0.134063	11	3	Axl,Bax,Mertk	female genitalia development	0.379647
GO:0032374	2.78193	0.134063	11	3	Abcg1,Lamtor1,Lrp1	regulation of cholesterol transport	0.379647
GO:0032689	2.78193	0.134063	11	3	Gas6,Tlr4,Pglyrp3	negative regulation of interferon-gamma production	0.379647
GO:0042304	2.78193	0.134063	11	3	Insig2,Mid1ip1,Acadvl	regulation of fatty acid biosynthetic process	0.379647
GO:0043516	2.78193	0.134063	11	3	Cd74,Smyd2,Spred1	regulation of DNA damage response, signal transduction by p53 class mediator	0.379647
GO:0051646	2.78193	0.134063	11	3	Mef2a,Mtm1,Kif1b	mitochondrion localization	0.379647
GO:0060742	2.78193	0.134063	11	3	Psap,Ctnnb1,Rxra	epithelial cell differentiation involved in prostate gland development	0.379647
GO:0001659	2.28377	0.135031	17	4	Acadvl,Tnfrsf11a,Ptger3,Adrb2	temperature homeostasis	0.379647
GO:0015844	2.28377	0.135031	17	4	Ly6e,Cd300a,Fcer1g,Fcgr3	monoamine transport	0.379647
GO:0030858	2.28377	0.135031	17	4	Acvrl1,Ctnnb1,Prkch,Btg1	positive regulation of epithelial cell differentiation	0.379647
GO:0032481	2.28377	0.135031	17	4	Irf7,Hspd1,Tlr4,Ddx58	positive regulation of type I interferon production	0.379647
GO:0032720	2.28377	0.135031	17	4	Axl,Gas6,Tlr4,Arrb2	negative regulation of tumor necrosis factor production	0.379647
GO:0033028	2.28377	0.135031	17	4	Mef2c,Adam17,Fcer1g,Ccr5	myeloid cell apoptotic process	0.379647
GO:0045104	2.28377	0.135031	17	4	Ndel1,Cln8,Vim,Mtm1	intermediate filament cytoskeleton organization	0.379647
GO:0045428	2.28377	0.135031	17	4	Tlr2,Gla,Tlr4,Ptk2b	regulation of nitric oxide biosynthetic process	0.379647
GO:0048525	2.28377	0.135031	17	4	Ccl3,Ifitm3,Bst2,Ifitm2	negative regulation of viral reproduction	0.379647
GO:0060420	2.28377	0.135031	17	4	Mef2c,Dusp6,Sav1,Rbpj	regulation of heart growth	0.379647
GO:0071229	1.85975	0.135169	40	8	Cdh1,Ubr2,Col1a2,Lamtor1,S100a10,Pid1,Lamtor5,Lamtor3	cellular response to acid	0.379647
GO:0030032	2.02685	0.135871	28	6	Rac1,Parvb,Fgd4,Ptpro,Cyfip1,Arhgef7	lamellipodium assembly	0.379681
GO:0043241	2.02685	0.135871	28	6	Napa,Mid1ip1,Twf1,Lima1,Mtpn,Fgf13	protein complex disassembly	0.379681
GO:0010769	1.51115	0.139802	89	15	Arpc2,Ctnnb1,Gdi1,Trpv2,Ywhah,Psen1,Pofut2,Dab2,Ptk2,Nrp1,Ngef,Fgf13,Ist1,Plxnb2,Rap2a	regulation of cell morphogenesis involved in differentiation	0.389675
GO:0000302	1.80309	0.142598	41	8	Cd36,Prdx2,Nfe2l2,Gpx3,Prdx3,Cat,Rhob,Romo1	response to reactive oxygen species	0.395468
GO:0034599	1.80309	0.142598	41	8	Cd36,Prdx2,Nfe2l2,Gpx3,Prdx3,Cat,Rhob,Romo1	cellular response to oxidative stress	0.395468
GO:0030900	1.37902	0.144826	167	26	Rac1,Axl,Bax,Ctnnb1,Ubc,Psen2,Rarb,Ndel1,Psen1,Id2,App,Hprt,Creb1,Srgap2,Zeb2,Ski,Atg7,Fgf13,Atrx,Aplp2,Kdm1a,Rbpj,Plcb1,Cx3cr1,Tacc1,Pgap1	forebrain development	0.400636
GO:0032956	1.58813	0.145475	74	13	Rac1,Mef2c,Arpc2,Rhoa,Twf1,Nckap1l,Lima1,Myo1f,Csf1r,Mtpn,Lrp1,Bst2,Ptk2b	regulation of actin cytoskeleton organization	0.401423
GO:0006984	1.93841	0.147608	29	6	Bax,Nfe2l2,Derl1,Serp1,Lmna,Ccnd1	ER-nucleus signaling pathway	0.403268
GO:0007628	1.93841	0.147608	29	6	Npc1,Hexa,Cln8,Atg7,Pcdh15,Arrb2	adult walking behavior	0.403268
GO:0010469	1.93841	0.147608	29	6	Psen2,Psen1,Ppp2ca,App,Aplp2,Myo5a	regulation of receptor activity	0.403268
GO:0042158	1.93841	0.147608	29	6	Apoe,Atg10,Atg7,Pgap2,Zdhhc7,Apobec1	lipoprotein biosynthetic process	0.403268
GO:0015711	1.51063	0.148283	95	16	Serinc1,Psen1,Slc7a8,Slc11a1,Sept2,Cln8,Tnfrsf11a,Plin2,Slc37a2,Slco2a1,Folr2,Arl6ip5,Slc38a7,Slc43a2,Ptger3,Kcnn4	organic anion transport	0.404107
GO:0016051	1.74972	0.15114	42	8	Insr,Mpdu1,Igf1,Got1,Atf3,Akr1a1,Gnpda1,Ptk2b	carbohydrate biosynthetic process	0.409866
GO:0030041	1.74972	0.15114	42	8	Rac1,Arpc2,Mtss1,Twf1,Nckap1l,Aif1,Gas7,Ptk2b	actin filament polymerization	0.409866
GO:0055082	1.39713	0.153487	146	23	Ccl3,Apoe,Bax,Psen2,Atox1,Psen1,Micu1,Ap3d1,Hexb,Anxa7,App,Atp6v0c,Slc11a1,Gas6,Mt1,Aplp2,Slc37a4,Nptn,Fkbp1a,Pim3,Ptger3,Ryr3,Ptk2b	cellular chemical homeostasis	0.415208
GO:0015672	1.53709	0.154795	76	13	Akt1,Vps4b,Atp6v0e,Ywhah,Atp6v1e1,Cd63,Atp6v0b,Nsf,Slc38a7,Atp5l,Adrb2,Kcnn4,Gm10221	monovalent inorganic cation transport	0.417719
GO:0032434	1.85717	0.160738	30	6	Akt1,Psen2,Atraid,Psen1,Trib1,Stub1	regulation of proteasomal ubiquitin-dependent protein catabolic process	0.422153
GO:0046635	1.85717	0.160738	30	6	Cd83,Ap3d1,Nckap1l,Il4ra,Il2rg,Tgfbr2	positive regulation of alpha-beta T cell activation	0.422153
GO:0050830	1.85717	0.160738	30	6	Cd36,Myo1f,Tlr2,C5ar1,Lyz1,Lyz2	defense response to Gram-positive bacterium	0.422153
GO:0043123	1.69939	0.160741	43	8	Cd36,Ctnnb1,Rhoa,Sharpin,Clec4n,Bcl10,Tlr4,Ube2n	positive regulation of I-kappaB kinase/NF-kappaB cascade	0.422153
GO:0051924	1.69939	0.160741	43	8	Ccl3,Bax,Trpv2,Saraf,Fkbp1a,Myo5a,Orai1,Ptk2b	regulation of calcium ion transport	0.422153
GO:0006816	1.4922	0.162207	102	17	Ccl3,Sri,Bax,Psen2,Anxa6,Trpv2,Atp2b1,Psen1,Ppp3ca,P2rx4,Saraf,Fkbp1a,Myo5a,Selk,Orai1,Ryr3,Ptk2b	calcium ion transport	0.422153
GO:0007611	1.5576	0.163302	81	14	Gm2a,Man2b1,Mef2c,Psen2,Psen1,Vdac1,Hmgcr,App,Hras,Cln8,Nras,Fgf13,Atp1a3,Plcb1	learning or memory	0.422153
GO:0000002	2.47235	0.163723	12	3	Rrm2b,Mef2a,Mrpl17	mitochondrial genome maintenance	0.422153
GO:0000303	2.47235	0.163723	12	3	Cd36,Prdx2,Nfe2l2	response to superoxide	0.422153
GO:0001709	2.47235	0.163723	12	3	Mef2c,Cdc42,Ctnnb1	cell fate determination	0.422153
GO:0006301	2.47235	0.163723	12	3	Pola1,Pcna,Ube2n	postreplication repair	0.422153
GO:0009410	2.47235	0.163723	12	3	Ahr,Gsto1,Nceh1	response to xenobiotic stimulus	0.422153
GO:0016126	2.47235	0.163723	12	3	Insig2,Hmgcr,Abcg1	sterol biosynthetic process	0.422153
GO:0032728	2.47235	0.163723	12	3	Irf7,Tlr4,Ddx58	positive regulation of interferon-beta production	0.422153
GO:0035987	2.47235	0.163723	12	3	Ctnnb1,Dusp6,Leo1	endodermal cell differentiation	0.422153
GO:0045744	2.47235	0.163723	12	3	Mgrn1,Rgs2,Adrb2	negative regulation of G-protein coupled receptor protein signaling pathway	0.422153
GO:0046825	2.47235	0.163723	12	3	Prkaca,Camk1,Gas6	regulation of protein export from nucleus	0.422153
GO:0046889	2.47235	0.163723	12	3	Mid1ip1,Abcg1,Creb1	positive regulation of lipid biosynthetic process	0.422153
GO:0070527	2.47235	0.163723	12	3	Plek,Fermt3,Lyn	platelet aggregation	0.422153
GO:0021543	1.60568	0.164792	62	11	Rac1,Bax,Ndel1,Psen1,Srgap2,Zeb2,Atg7,Fgf13,Plcb1,Cx3cr1,Tacc1	pallium development	0.423917
GO:0008654	1.76246	0.168607	47	9	Sptlc2,Hexb,Fabp5,Pgap2,Abhd5,Lpcat2,Sh3glb1,Cd81,Pla2g16	phospholipid biosynthetic process	0.431713
GO:0030336	1.76246	0.168607	47	9	Nisch,Srgap2,Ptprm,Rap2b,Rras,Lrp1,Bst2,Plcb1,Rap2a	negative regulation of cell migration	0.431713
GO:0031668	1.57448	0.170554	63	11	Axl,Ctsd,Sqstm1,Psen1,Fos,Ctsl,Atg3,Npc1,Gas6,Aes,Usf2	cellular response to extracellular stimulus	0.435685
GO:0010975	1.44046	0.170969	105	17	Akt1,Gdi1,Trpv2,Ndel1,Ywhah,Psen1,Ptk2,Nrp1,Ngef,Vim,Camk1,Fgf13,Ist1,Nptn,Plxnb2,Arf6,Rap2a	regulation of neuron projection development	0.435733
GO:0034620	2.18466	0.173101	22	5	Bax,Nfe2l2,Derl1,Serp1,Ccnd1	cellular response to unfolded protein	0.43963
GO:2000146	1.71693	0.173297	48	9	Nisch,Srgap2,Ptprm,Rap2b,Rras,Lrp1,Bst2,Plcb1,Rap2a	negative regulation of cell motility	0.43963
GO:0051347	1.34353	0.178578	164	25	Rac1,Map2k1,Prdx2,Cdc42,Serinc1,Psen1,Dab2,Ptk2,Fgd4,Csf1r,Adam8,Slc11a1,Zeb2,Camk1,Gas6,Tgfbr2,Trib1,Trf,Cd81,Tlr4,Lyn,Ptk2b,Hmgb1,Ccnd1,Ube2n	positive regulation of transferase activity	0.451986
GO:0010954	1.85846	0.18192	35	7	Akt1,Psen2,Psen1,Adam8,Adam9,Trib1,Stub1	positive regulation of protein processing	0.457451
GO:0019725	1.35917	0.183085	169	26	Ccl3,Apoe,Bax,Ubc,Psen2,Atox1,Psen1,Micu1,Ap3d1,Hexb,Anxa7,App,Atp6v0c,Slc11a1,Mtm1,Gas6,Mt1,Aplp2,Slc37a4,Nptn,Fkbp1a,Pim3,Ptger3,Kcnn4,Ryr3,Ptk2b	cellular homeostasis	0.457451
GO:0001936	2.06293	0.183645	23	5	Acvrl1,Pold4,Ecm1,Ptprm,Jun	regulation of endothelial cell proliferation	0.457451
GO:0002437	2.06293	0.183645	23	5	Fcgr1,Fcgr2b,Rbpj,Fcer1g,Fcgr3	inflammatory response to antigenic stimulus	0.457451
GO:0007006	2.06293	0.183645	23	5	Bax,Timm9,Cln8,Oma1,Sh3glb1	mitochondrial membrane organization	0.457451
GO:0031929	2.06293	0.183645	23	5	Ubr2,Lamtor1,Gas6,Lamtor5,Lamtor3	TOR signaling cascade	0.457451
GO:0061383	2.06293	0.183645	23	5	Rhoa,Fbn2,Slc40a1,Fkbp1a,Rbpj	trabecula morphogenesis	0.457451
GO:0050708	1.63253	0.185966	50	9	Ccl3,Clec4n,Tlr2,Clec5a,Il4ra,Gas6,Lyn,AF251705,Kcnn4	regulation of protein secretion	0.460864
GO:0051271	1.63253	0.185966	50	9	Nisch,Srgap2,Ptprm,Rap2b,Rras,Lrp1,Bst2,Plcb1,Rap2a	negative regulation of cellular component movement	0.460864
GO:0032535	1.4907	0.186271	90	15	Akt1,Rac1,Arpc2,Trpv2,Twf1,Nckap1l,Lima1,Nrp1,Creb1,Cln8,Mtpn,Fgf13,Ist1,Ptk2b,Lamtor5	regulation of cellular component size	0.460864
GO:0003208	1.79407	0.189192	36	7	Mef2c,Ctnnb1,Rxra,Ly6e,Tpm1,Fkbp1a,Rbpj	cardiac ventricle morphogenesis	0.464684
GO:0048644	1.79407	0.189192	36	7	Ctnnb1,Rxra,Ly6e,Serp1,Tpm1,Fkbp1a,Rbpj	muscle organ morphogenesis	0.464684
GO:0050727	1.47079	0.189361	91	15	Ccl3,Apoe,Fcgr1,Sharpin,Adam8,Tnfrsf11a,Fcgr2b,Tnfrsf1b,Tnfrsf1a,Tlr4,Lyn,Zfp36,Fcer1g,Fcgr3,Fabp4	regulation of inflammatory response	0.464684
GO:0050671	1.59334	0.193848	51	9	Mef2c,Nckap1l,Cdkn1a,Aif1,Cd81,Tlr4,Il18,Selk,Gpr183	positive regulation of lymphocyte proliferation	0.464684
GO:0070848	1.34555	0.19414	144	22	Acvrl1,Ramp2,Akt1,Braf,Insr,Mef2c,Ctnnb1,Nlk,Dusp6,Dab2,Fbn2,Fam20c,Creb1,Rab14,Ski,Flt1,Gas6,Adam9,Nptn,Myof,Adam17,Dusp22	response to growth factor stimulus	0.464684
GO:0000305	2.2248	0.195088	13	3	Cd36,Prdx2,Nfe2l2	response to oxygen radical	0.464684
GO:0006584	2.2248	0.195088	13	3	Comt,Ly6e,Hprt	catecholamine metabolic process	0.464684
GO:0009712	2.2248	0.195088	13	3	Comt,Ly6e,Hprt	catechol-containing compound metabolic process	0.464684
GO:0016044	2.2248	0.195088	13	3	Atg7,Lpcat2,Sgcz	cellular membrane organization	0.464684
GO:0030819	2.2248	0.195088	13	3	Adcy9,Adcy7,Adrb2	positive regulation of cAMP biosynthetic process	0.464684
GO:0031111	2.2248	0.195088	13	3	Mid1ip1,Mapre1,Fgf13	negative regulation of microtubule polymerization or depolymerization	0.464684
GO:0032370	2.2248	0.195088	13	3	Abcg1,Tnfrsf11a,Lrp1	positive regulation of lipid transport	0.464684
GO:0045214	2.2248	0.195088	13	3	Mef2c,Prkar1a,Actg1	sarcomere organization	0.464684
GO:0045581	2.2248	0.195088	13	3	Prdx2,Cd74,Il4ra	negative regulation of T cell differentiation	0.464684
GO:0045761	2.2248	0.195088	13	3	Adcy9,Adcy7,Adrb2	regulation of adenylate cyclase activity	0.464684
GO:0090398	2.2248	0.195088	13	3	Calr,Id2,Hmga1-rs1	cellular senescence	0.464684
GO:0097028	2.2248	0.195088	13	3	Tgfbr2,Lyn,Pirb	dendritic cell differentiation	0.464684
GO:0006809	1.95404	0.196256	24	5	Tlr2,P2rx4,Gla,Tlr4,Ptk2b	nitric oxide biosynthetic process	0.464684
GO:0030433	1.95404	0.196256	24	5	Ube2g2,Derl1,Dnajc10,Nploc4,Fbxo6	ER-associated protein catabolic process	0.464684
GO:0042770	1.95404	0.196256	24	5	Cd74,Smyd2,Spred1,Triap1,Pgap2	signal transduction in response to DNA damage	0.464684
GO:0052547	1.43249	0.197402	93	15	Cdh1,Akt1,Bax,Fn1,Serpinb8,Ecm1,Bcl10,Gas6,Ctsh,Nlrp3,Nlrc4,Hip1,Serpinb6a,Serpinb2,Serpinb10	regulation of peptidase activity	0.466393
GO:0051092	1.73393	0.197895	37	7	Prkch,Adam8,Cat,Bcl10,Mtpn,Rab7b,Ube2n	positive regulation of NF-kappaB transcription factor activity	0.466557
GO:0055001	1.48846	0.200836	72	12	Ramp2,Mef2c,Prkar1a,Lmna,Ppp3ca,Ski,Atg7,Mef2a,Kdm1a,Pbrm1,Plcb1,Actg1	muscle cell development	0.472481
GO:0008037	1.67766	0.207935	38	7	Cd36,Fcgr1,App,Nrp1,Sirpa,Fcgr3,Clec7a	cell recognition	0.483907
GO:0043407	1.67766	0.207935	38	7	Dusp3,Dusp6,Hmgcr,Rgs2,Spred1,Lyn,Dusp7	negative regulation of MAP kinase activity	0.483907
GO:0045732	1.67766	0.207935	38	7	Akt1,Psen2,Psen1,Adam8,Adam9,Trib1,Stub1	positive regulation of protein catabolic process	0.483907
GO:0046620	1.67766	0.207935	38	7	Mef2c,Dusp6,Sav1,Ptk2,Bcl2l11,Serp1,Rbpj	regulation of organ growth	0.483907
GO:0051896	1.67766	0.207935	38	7	Axl,Igf1,Ptk2,Itsn1,Adam8,Gas6,Arrb2	regulation of protein kinase B signaling cascade	0.483907
GO:0051260	1.61756	0.208331	56	10	Cdh1,Bax,Gpx3,Pcbd2,Ehd4,Bcl10,Nlrc4,Dcxr,Atpif1,Ryr3	protein homooligomerization	0.483907
GO:0008542	1.85588	0.210732	25	5	Hmgcr,App,Hras,Nras,Atp1a3	visual learning	0.486615
GO:0016236	1.85588	0.210732	25	5	Ctsd,Sqstm1,Psen1,Atg3,Npc1	macroautophagy	0.486615
GO:0009991	1.51277	0.211264	77	13	Akt1,Axl,Ctsd,Sqstm1,Psen1,Fos,Ctsl,Atg3,Npc1,Atg7,Gas6,Aes,Usf2	response to extracellular stimulus	0.486615
GO:0051047	1.51277	0.211264	77	13	Ccl3,Clec4n,Creb1,Tnfrsf11a,Stxbp1,Serp1,Tlr2,Clec5a,Il4ra,AF251705,Plcb1,Kcnn4,Fcer1g	positive regulation of secretion	0.486615
GO:0009913	1.58283	0.212814	57	10	Rac1,Map2k1,Cdc42,Tsg101,Sav1,Prkch,Sharpin,Myo7a,Rbpj,Pcdh15	epidermal cell differentiation	0.489161
GO:0008344	1.54955	0.218295	58	10	Cstb,Eps8,App,Npc1,Hexa,Cln8,Atg7,Atp1a3,Pcdh15,Arrb2	adult locomotory behavior	0.498573
GO:0045580	1.54955	0.218295	58	10	Prdx2,Cd83,Ap3d1,Nckap1l,Cd74,Adam8,Il4ra,Il2rg,Tgfbr2,H2-DMa	regulation of T cell differentiation	0.498573
GO:0045785	1.54955	0.218295	58	10	Arpc2,Dab2,Nckap1l,Arl2,Adam8,Hsd17b12,Spp1,L1cam,Thbs1,Ptk2b	positive regulation of cell adhesion	0.498573
GO:0050801	1.30714	0.21872	161	24	Ccl3,Apoe,Bax,Psen2,Atox1,Psen1,Micu1,Ap3d1,Hexb,Anxa7,App,Atp6v0c,Got1,Slc40a1,Slc11a1,Gclm,Mt1,Aplp2,Slc37a4,Nptn,Fkbp1a,Ptger3,Ryr3,Ptk2b	ion homeostasis	0.498573
GO:0003014	1.7672	0.226876	26	5	Rrm2b,Ptpro,Gas6,Myo1e,Ptger3	renal system process	0.50543
GO:0007613	1.7672	0.226876	26	5	Psen2,Psen1,Fgf13,Atp1a3,Plcb1	memory	0.50543
GO:0000060	2.02223	0.227751	14	3	Cdkn1a,Slc11a1,Gas6	protein import into nucleus, translocation	0.50543
GO:0001662	2.02223	0.227751	14	3	Mef2c,Vdac1,Penk	behavioral fear response	0.50543
GO:0007032	2.02223	0.227751	14	3	Vps4b,Rab5c,Lamtor1	endosome organization	0.50543
GO:0010453	2.02223	0.227751	14	3	Ctnnb1,Dusp6,Rbpj	regulation of cell fate commitment	0.50543
GO:0010717	2.02223	0.227751	14	3	Ctnnb1,Pofut2,Dab2	regulation of epithelial to mesenchymal transition	0.50543
GO:0030224	2.02223	0.227751	14	3	Mef2c,Inpp5d,Jun	monocyte differentiation	0.50543
GO:0035886	2.02223	0.227751	14	3	Ramp2,Ctnnb1,Pbrm1	vascular smooth muscle cell differentiation	0.50543
GO:0040015	2.02223	0.227751	14	3	Lgmn,Atxn2,Adrb2	negative regulation of multicellular organism growth	0.50543
GO:0048147	2.02223	0.227751	14	3	Bax,Ski,Ifi30	negative regulation of fibroblast proliferation	0.50543
GO:0060043	2.02223	0.227751	14	3	Mef2c,Sav1,Rbpj	regulation of cardiac muscle cell proliferation	0.50543
GO:0060977	2.02223	0.227751	14	3	Ctnnb1,Rxra,Pbrm1	coronary vasculature morphogenesis	0.50543
GO:0010498	1.39212	0.228155	108	17	Akt1,Ube2g2,Psen2,Atraid,Sirt2,Psen1,Derl1,Rbx1,Dnajc10,Rnf4,Trib1,Vhl,Stub1,Nploc4,Fbxl7,Fbxo6,Pcbp2	proteasomal protein catabolic process	0.50543
GO:0007270	1.65186	0.236219	44	8	Napa,Psen1,Vdac1,Hras,Stxbp1,Nras,Arrb2,Kif1b	neuron-neuron synaptic transmission	0.519656
GO:0042594	1.65186	0.236219	44	8	Ctsd,Sqstm1,Psen1,Ctsl,Atg3,Npc1,Atg7,Gas6	response to starvation	0.519656
GO:0051607	1.65186	0.236219	44	8	Ifnar1,Ifitm3,Irf5,Itgax,Nlrp3,Ddx58,Pcbp2,Ifitm2	defense response to virus	0.519656
GO:0030098	1.29387	0.236465	176	26	Axl,Bax,Prdx2,Ctnnb1,Mertk,Cd83,Ap3d1,Id2,Xrcc4,Nckap1l,Cd74,Adam8,Inpp5d,Il4ra,Il2rg,Gas6,Tgfbr2,H2-DMa,Rbpj,Pglyrp3,Gpr183,Adam17,Lgals8,Nfam1,Ptk2b,Lgals1	lymphocyte differentiation	0.519656
GO:0008361	1.60689	0.242664	45	8	Akt1,Trpv2,Nrp1,Creb1,Cln8,Fgf13,Ist1,Lamtor5	regulation of cell size	0.530107
GO:0034976	1.60689	0.242664	45	8	Bax,Nfe2l2,Sel1l,Derl1,Dnajc10,Bcl2l11,Serp1,Ccnd1	response to endoplasmic reticulum stress	0.530107
GO:0008610	1.3233	0.242665	146	22	Insig2,Elovl1,Mid1ip1,Cers2,Acadvl,Sptlc2,Hexb,Hmgcr,Abcg1,Cd74,Creb1,Fabp5,Fam213b,Pgap2,Tecr,Elovl5,Abhd5,Lpcat2,Myo5a,Sh3glb1,Cd81,Pla2g16	lipid biosynthetic process	0.530107
GO:0043405	1.34093	0.250547	118	18	Dusp3,Map2k1,Prdx2,Dusp6,Psen1,Hmgcr,Dab2,Fgd4,Adam8,Rgs2,Zeb2,Spred1,Trib1,Trf,Cd81,Tlr4,Lyn,Dusp7	regulation of MAP kinase activity	0.546242
GO:0043086	1.2747	0.255877	192	28	Akt1,Dusp3,Psen2,Dusp6,Psen1,Prkar1a,Hmgcr,Nckap1l,Cdkn1a,Arl2,Serpinb8,Cln8,Rgs2,Spred1,Ecm1,Gla,Gas6,Fkbp1a,Txnip,Dgkz,Lyn,Dusp7,Atpif1,Serpinb6a,Serpinb2,Fabp4,Fkbp15,Serpinb10	negative regulation of catalytic activity	0.55676
GO:0006959	1.78258	0.257054	31	6	Tfe3,Mef2c,Fcgr2b,C1qa,Rbpj,Gpr183	humoral immune response	0.557835
GO:0000187	1.52389	0.259171	47	8	Map2k1,Prdx2,Dab2,Fgd4,Adam8,Trf,Cd81,Tlr4	activation of MAPK activity	0.557835
GO:0031334	1.52389	0.259171	47	8	Rac1,Bax,Arpc2,Rhoa,Plek,Nckap1l,Arl2,Ptk2b	positive regulation of protein complex assembly	0.557835
GO:0030239	2.12037	0.259918	18	4	Mef2c,Prkar1a,Mef2a,Actg1	myofibril assembly	0.557835
GO:0031333	2.12037	0.259918	18	4	Vdac2,Twf1,Mapre1,Mtpn	negative regulation of protein complex assembly	0.557835
GO:0043370	2.12037	0.259918	18	4	Cd83,Nckap1l,Il4ra,Il2rg	regulation of CD4-positive, alpha-beta T cell differentiation	0.557835
GO:0045103	2.12037	0.259918	18	4	Ndel1,Cln8,Vim,Mtm1	intermediate filament-based process	0.557835
GO:0009128	1.71368	0.26519	32	6	Hprt,Dnajc10,Nudt9,Entpd1,Kif1b,Rnf213	purine nucleoside monophosphate catabolic process	0.561529
GO:0043200	1.71368	0.26519	32	6	Cdh1,Ubr2,Col1a2,Lamtor1,Lamtor5,Lamtor3	response to amino acid stimulus	0.561529
GO:0050803	1.71368	0.26519	32	6	Mef2c,Etv5,Ptk2,App,Camk1,Frmpd4	regulation of synapse structure and activity	0.561529
GO:0051494	1.71368	0.26519	32	6	Mid1ip1,Twf1,Lima1,Mapre1,Mtpn,Fgf13	negative regulation of cytoskeleton organization	0.561529
GO:0061136	1.71368	0.26519	32	6	Akt1,Psen2,Atraid,Psen1,Trib1,Stub1	regulation of proteasomal protein catabolic process	0.561529
GO:0014070	1.32296	0.265209	126	19	Ccl3,Cd36,Mef2c,Ctnnb1,Cd83,Ctsl,Npc1,Stat1,Adam9,Tgfbr2,Fkbp1a,Cebpa,Ephx1,Ube2l3,Ddx58,Ryr3,Hmgb1,Prkcg,Naip2	response to organic cyclic compound	0.561529
GO:0051493	1.32296	0.265209	126	19	Rac1,Mef2c,Arpc2,Cdc42,Rhoa,Mid1ip1,Twf1,Nckap1l,Lima1,Myo1f,Csf1r,Arl2,Mapre1,Rnf4,Mtpn,Fgf13,Lrp1,Bst2,Ptk2b	regulation of cytoskeleton organization	0.561529
GO:0050730	1.40992	0.266169	69	11	Cd36,Psen2,Psen1,App,Cd74,Csf1r,Gas6,Aplp2,Rap2b,Cd81,Lyn	regulation of peptidyl-tyrosine phosphorylation	0.562022
GO:0032880	1.2974	0.266463	162	24	Cdh1,Ccl3,Akt1,Cd36,Prkaca,Cdc42,Litaf,Cdkn1a,Clec4n,Rbm22,Arhgdia,Sept2,Rab14,Tlr2,Clec5a,Camk1,Il4ra,Gas6,Sh3glb1,Lyn,Arf6,AF251705,Mapk14,Kcnn4	regulation of protein localization	0.562022
GO:0048839	1.36152	0.2682	97	15	Cdh1,Naglu,Rac1,Insig2,Igf1,Myo7a,Cebpa,Igfbp7,C1qb,H2-DMa,Rbpj,Pcdh15,Maf,H2-K1,Mafb	inner ear development	0.564301
GO:0031344	1.31044	0.268573	127	19	Akt1,Rac1,Cdc42,Gdi1,Trpv2,Ndel1,Ywhah,Psen1,Ptk2,Nrp1,Ngef,Vim,Camk1,Fgf13,Ist1,Nptn,Plxnb2,Arf6,Rap2a	regulation of cell projection organization	0.564301
GO:0031669	1.4855	0.269081	48	8	Ctsd,Sqstm1,Psen1,Ctsl,Atg3,Npc1,Gas6,Usf2	cellular response to nutrient levels	0.564301
GO:0009615	1.46376	0.27152	73	12	Ifnar1,Ifitm3,Bcl2l11,Irf5,Itgax,Nlrp3,Tlr13,Ddx58,Bst2,Pcbp2,Ifitm2,Ifi27l2a	response to virus	0.566653
GO:0001913	1.9787	0.272261	19	4	Ctsc,Ctsh,H2-K1,H2-D1	T cell mediated cytotoxicity	0.566653
GO:0030814	1.9787	0.272261	19	4	Adcy9,Timp2,Adcy7,Adrb2	regulation of cAMP metabolic process	0.566653
GO:0060119	1.9787	0.272261	19	4	Naglu,Rac1,Myo7a,Pcdh15	inner ear receptor cell development	0.566653
GO:0001101	1.43986	0.274961	74	12	Cdh1,Bax,Lgmn,Ubr2,Scamp3,Col1a2,Lamtor1,Ctsh,S100a10,Pid1,Lamtor5,Lamtor3	response to acid	0.568092
GO:0051145	1.64989	0.275016	33	6	Ramp2,Mef2c,Ctnnb1,Med28,Pbrm1,Ankrd17	smooth muscle cell differentiation	0.568092
GO:0055008	1.64989	0.275016	33	6	Ctnnb1,Rxra,Ly6e,Tpm1,Fkbp1a,Rbpj	cardiac muscle tissue morphogenesis	0.568092
GO:0060415	1.64989	0.275016	33	6	Ctnnb1,Rxra,Ly6e,Tpm1,Fkbp1a,Rbpj	muscle tissue morphogenesis	0.568092
GO:0050768	1.55598	0.277062	52	9	Ctnnb1,Gdi1,Ywhah,Psen1,Id2,Ptk2,Nrp1,Fgf13,Ctnna1	negative regulation of neurogenesis	0.571246
GO:0042176	1.41673	0.279227	75	12	Akt1,Cdc42,Psen2,Atraid,Psen1,Ppp2ca,Ptk2,Adam8,Adam9,Trib1,Stub1,Ptk2b	regulation of protein catabolic process	0.573864
GO:0006006	1.52032	0.281848	53	9	Akt1,Insr,Igf1,Atf3,Fabp5,Serp1,Dcxr,Mapk14,Hmgb1	glucose metabolic process	0.573864
GO:0032147	1.39431	0.284286	76	12	Map2k1,Prdx2,Psen1,Dab2,Fgd4,Adam8,Slc11a1,Gas6,Tgfbr2,Trf,Cd81,Tlr4	activation of protein kinase activity	0.573864
GO:0043161	1.33819	0.286203	105	16	Akt1,Ube2g2,Psen2,Atraid,Sirt2,Psen1,Derl1,Rbx1,Dnajc10,Rnf4,Trib1,Stub1,Nploc4,Fbxl7,Fbxo6,Pcbp2	proteasomal ubiquitin-dependent protein catabolic process	0.573864
GO:0051146	1.33819	0.286203	105	16	Akt1,Mef2c,Rxra,Rarb,Prkar1a,Hras,Capn2,Nras,Lmna,Ppp3ca,Ski,Atg7,Mef2a,Plcb1,Mapk14,Actg1	striated muscle cell differentiation	0.573864
GO:0008306	1.59065	0.286384	34	6	Hmgcr,App,Hras,Cln8,Nras,Atp1a3	associative learning	0.573864
GO:0009187	1.59065	0.286384	34	6	Adcy9,Timp2,Pde4d,Adcy7,Adrb2,Ptk2b	cyclic nucleotide metabolic process	0.573864
GO:0030330	1.85459	0.287193	20	4	Cd74,Smyd2,Spred1,Triap1	DNA damage response, signal transduction by p53 class mediator	0.573864
GO:0031032	1.85459	0.287193	20	4	Mef2c,Prkar1a,Mef2a,Actg1	actomyosin structure organization	0.573864
GO:0040036	1.85459	0.287193	20	4	Ctnnb1,Dusp6,Fam20c,Nptn	regulation of fibroblast growth factor receptor signaling pathway	0.573864
GO:0042491	1.85459	0.287193	20	4	Rac1,Myo7a,Rbpj,Pcdh15	auditory receptor cell differentiation	0.573864
GO:0043487	1.85459	0.287193	20	4	Slc11a1,Tnfrsf1b,Apobec1,Zfp36	regulation of RNA stability	0.573864
GO:0043525	1.85459	0.287193	20	4	Ccl3,Bax,Bcl2l11,Bag1	positive regulation of neuron apoptotic process	0.573864
GO:0045670	1.85459	0.287193	20	4	Tfe3,Ccl3,Ctnnb1,Inpp5d	regulation of osteoclast differentiation	0.573864
GO:0046148	1.85459	0.287193	20	4	Tyr,Aprt,Hprt,Myo5a	pigment biosynthetic process	0.573864
GO:0046330	1.85459	0.287193	20	4	Tlr4,Plcb1,Ptk2b,Dusp22	positive regulation of JNK cascade	0.573864
GO:0051928	1.85459	0.287193	20	4	Ccl3,Bax,Trpv2,Orai1	positive regulation of calcium ion transport	0.573864
GO:0035051	1.48624	0.287749	54	9	Mef2c,Ctnnb1,Rxra,Rarb,Lmna,Atg7,Mef2a,Rbpj,Pbrm1	cardiocyte differentiation	0.573935
GO:0071363	1.30433	0.290411	141	21	Acvrl1,Ramp2,Akt1,Insr,Mef2c,Ctnnb1,Nlk,Dusp6,Dab2,Fbn2,Fam20c,Creb1,Rab14,Ski,Flt1,Gas6,Adam9,Nptn,Myof,Adam17,Dusp22	cellular response to growth factor stimulus	0.578196
GO:0043409	1.45364	0.294705	55	9	Dusp3,Dusp6,Igf1,Hmgcr,Rgs2,Spred1,Tlr4,Lyn,Dusp7	negative regulation of MAPK cascade	0.584631
GO:0048638	1.45364	0.294705	55	9	Mef2c,Trpv2,Dusp6,Sav1,Nrp1,Fgf13,Ist1,Rbpj,Plcb1	regulation of developmental growth	0.584631
GO:0006820	1.34687	0.297909	111	17	Serinc1,Psen1,Slc7a8,Slc11a1,Sept2,Cln8,Tnfrsf11a,Plin2,Slc37a2,Slco2a1,Folr2,Arl6ip5,Slc38a7,Slc43a2,Ptger3,P2ry6,Kcnn4	anion transport	0.588077
GO:0006641	1.53551	0.299148	35	6	Insig2,Lpl,Cat,Slc37a4,Abhd5,Apobr	triglyceride metabolic process	0.588077
GO:0031398	1.53551	0.299148	35	6	Ptk2,Bcl10,Trib1,Stub1,Ptk2b,Ube2n	positive regulation of protein ubiquitination	0.588077
GO:0042157	1.53551	0.299148	35	6	Apoe,Atg10,Atg7,Pgap2,Zdhhc7,Apobec1	lipoprotein metabolic process	0.588077
GO:0055007	1.53551	0.299148	35	6	Mef2c,Rxra,Rarb,Lmna,Atg7,Mef2a	cardiac muscle cell differentiation	0.588077
GO:0032970	1.40174	0.299647	82	13	Rac1,Mef2c,Arpc2,Rhoa,Twf1,Nckap1l,Lima1,Myo1f,Csf1r,Mtpn,Lrp1,Bst2,Ptk2b	regulation of actin filament-based process	0.588077
GO:0033674	1.29125	0.303468	149	22	Rac1,Map2k1,Prdx2,Cdc42,Psen1,Dab2,Ptk2,Fgd4,Csf1r,Adam8,Slc11a1,Zeb2,Camk1,Gas6,Tgfbr2,Trf,Cd81,Tlr4,Lyn,Ptk2b,Hmgb1,Ccnd1	positive regulation of kinase activity	0.594116
GO:0060996	1.74521	0.304343	21	4	Ngef,Srgap2,Camk1,Arf6	dendritic spine development	0.594116
GO:1901216	1.74521	0.304343	21	4	Ccl3,Bax,Bcl2l11,Bag1	positive regulation of neuron death	0.594116
GO:0014706	1.26981	0.31746	158	23	Mef2c,Cdc42,Ctnnb1,Rhoa,Sirt2,Rxra,Rarb,Prkar1a,Id2,Sav1,Ly6e,Lmna,Ppp3ca,Ski,Atg7,Mef2a,Tsc22d3,Sin3b,Tpm1,Fkbp1a,Rbpj,Plcb1,Mapk14	striated muscle tissue development	0.618194
GO:0051348	1.32387	0.3178	86	13	Dusp3,Psen2,Dusp6,Psen1,Prkar1a,Hmgcr,Cdkn1a,Cln8,Rgs2,Spred1,Lyn,Dusp7,Fabp4	negative regulation of transferase activity	0.618194
GO:0010466	1.57537	0.32068	40	7	Akt1,Serpinb8,Ecm1,Gas6,Serpinb6a,Serpinb2,Serpinb10	negative regulation of peptidase activity	0.621647
GO:0031667	1.42921	0.320704	62	10	Akt1,Ctsd,Sqstm1,Psen1,Ctsl,Atg3,Npc1,Atg7,Gas6,Usf2	response to nutrient levels	0.621647
GO:0007173	1.64794	0.323363	22	4	Psen2,Psen1,App,Aplp2	epidermal growth factor receptor signaling pathway	0.622486
GO:0032874	1.64794	0.323363	22	4	Tlr4,Plcb1,Ptk2b,Dusp22	positive regulation of stress-activated MAPK cascade	0.622486
GO:0048010	1.64794	0.323363	22	4	Nrp1,Flt1,Myof,Ptk2b	vascular endothelial growth factor receptor signaling pathway	0.622486
GO:0009267	1.52874	0.327543	41	7	Ctsd,Sqstm1,Psen1,Ctsl,Atg3,Npc1,Gas6	cellular response to starvation	0.622486
GO:0055088	1.48477	0.335763	42	7	Apoe,Npc2,Got1,Lamtor1,Slc37a4,Usf2,Fabp4	lipid homeostasis	0.622486
GO:0000768	1.85204	0.338099	10	2	Adam8,Capn2	syncytium formation by plasma membrane fusion	0.622486
GO:0006882	1.85204	0.338099	10	2	Ap3d1,Mt1	cellular zinc ion homeostasis	0.622486
GO:0010718	1.85204	0.338099	10	2	Ctnnb1,Dab2	positive regulation of epithelial to mesenchymal transition	0.622486
GO:0015804	1.85204	0.338099	10	2	Serinc1,Slc38a7	neutral amino acid transport	0.622486
GO:0018279	1.85204	0.338099	10	2	Ube2g2,Tusc3	protein N-linked glycosylation via asparagine	0.622486
GO:0020027	1.85204	0.338099	10	2	Cat,Lyn	hemoglobin metabolic process	0.622486
GO:0022011	1.85204	0.338099	10	2	Akt1,Ski	myelination in peripheral nervous system	0.622486
GO:0033599	1.85204	0.338099	10	2	Bax,Ccnd1	regulation of mammary gland epithelial cell proliferation	0.622486
GO:0034381	1.85204	0.338099	10	2	Cd36,Msr1	plasma lipoprotein particle clearance	0.622486
GO:0035909	1.85204	0.338099	10	2	Rbpj,Lrp1	aorta morphogenesis	0.622486
GO:0042417	1.85204	0.338099	10	2	Comt,Hprt	dopamine metabolic process	0.622486
GO:0045777	1.85204	0.338099	10	2	Id2,Tpm1	positive regulation of blood pressure	0.622486
GO:0046902	1.85204	0.338099	10	2	Bax,Sh3glb1	regulation of mitochondrial membrane permeability	0.622486
GO:0048260	1.85204	0.338099	10	2	Dab2,Hip1	positive regulation of receptor-mediated endocytosis	0.622486
GO:0048661	1.85204	0.338099	10	2	Id2,Aif1	positive regulation of smooth muscle cell proliferation	0.622486
GO:0050872	1.85204	0.338099	10	2	Cebpa,Fabp4	white fat cell differentiation	0.622486
GO:0050884	1.85204	0.338099	10	2	Hexa,Cln8	neuromuscular process controlling posture	0.622486
GO:0051443	1.85204	0.338099	10	2	Trib1,Ube2n	positive regulation of ubiquitin-protein ligase activity	0.622486
GO:0051647	1.85204	0.338099	10	2	Cdc42,Tacc1	nucleus localization	0.622486
GO:0060045	1.85204	0.338099	10	2	Mef2c,Rbpj	positive regulation of cardiac muscle cell proliferation	0.622486
GO:0060351	1.85204	0.338099	10	2	Rarb,Thbs1	cartilage development involved in endochondral bone morphogenesis	0.622486
GO:0070509	1.85204	0.338099	10	2	Trpv2,Micu1	calcium ion import	0.622486
GO:0071158	1.85204	0.338099	10	2	Prkaca,Id2	positive regulation of cell cycle arrest	0.622486
GO:2000178	1.85204	0.338099	10	2	Id2,Ctnna1	negative regulation of neural precursor cell proliferation	0.622486
GO:2000272	1.85204	0.338099	10	2	Psen2,Psen1	negative regulation of receptor activity	0.622486
GO:0002819	1.35045	0.339917	65	10	Mef2c,Fcgr1,Irf7,Slc11a1,Fcgr2b,Il4ra,Fcer1g,Fcgr3,H2-K1,H2-D1	regulation of adaptive immune response	0.624789
GO:0006801	1.56091	0.34393	23	4	Cd36,Prdx2,Nfe2l2,Sh3pxd2b	superoxide metabolic process	0.625173
GO:0007601	1.56091	0.34393	23	4	Cln8,Myo7a,Myo5a,Pcdh15	visual perception	0.625173
GO:0035315	1.56091	0.34393	23	4	Rac1,Myo7a,Rbpj,Pcdh15	hair cell differentiation	0.625173
GO:0043029	1.56091	0.34393	23	4	Akt1,Bax,Nckap1l,Bcl2l11	T cell homeostasis	0.625173
GO:0048008	1.56091	0.34393	23	4	Sgpl1,Myo1e,Txnip,Lrp1	platelet-derived growth factor receptor signaling pathway	0.625173
GO:0021537	1.32856	0.345176	99	15	Rac1,Bax,Rarb,Ndel1,Psen1,Id2,Hprt,Srgap2,Zeb2,Ski,Atg7,Fgf13,Plcb1,Cx3cr1,Tacc1	telencephalon development	0.625173
GO:0008064	1.44324	0.345236	43	7	Rac1,Arpc2,Twf1,Nckap1l,Lima1,Mtpn,Ptk2b	regulation of actin polymerization or depolymerization	0.625173
GO:0032388	1.44324	0.345236	43	7	Bax,Prkaca,Rbm22,Camk1,Gas6,Mapk14,Fcer1g	positive regulation of intracellular transport	0.625173
GO:0032609	1.44324	0.345236	43	7	Ifnar1,Hspd1,Slc11a1,Gas6,Tlr4,Il18,Pglyrp3	interferon-gamma production	0.625173
GO:0006650	1.36237	0.354245	71	11	Serinc1,Csf1r,Fabp5,Pgap2,Mtm1,Abhd5,Lpcat2,Pip5k1c,Sh3glb1,Cd81,Plcb1	glycerophospholipid metabolic process	0.640433
GO:0030832	1.40396	0.355855	44	7	Rac1,Arpc2,Twf1,Nckap1l,Lima1,Mtpn,Ptk2b	regulation of actin filament length	0.640702
GO:0048489	1.40396	0.355855	44	7	Napa,Ctnnb1,Psen1,Ap3d1,Stxbp1,Stx4a,Dennd1a	synaptic vesicle transport	0.640702
GO:0051604	1.24032	0.35614	140	20	Akt1,Bax,Psen2,Atraid,Psen1,Adam8,Bcl10,Furin,Disp1,Adam9,Ctsh,Trib1,Nlrp3,Oma1,Metap2,Nlrc4,Stub1,Hip1,Lonp2,Aph1c	protein maturation	0.640702
GO:0001569	1.68655	0.363162	27	5	Ctnnb1,Nrp1,Flt1,Tgfbr2,Cxcl12	patterning of blood vessels	0.651207
GO:0001935	1.68655	0.363162	27	5	Acvrl1,Pold4,Ecm1,Ptprm,Jun	endothelial cell proliferation	0.651207
GO:0001933	1.30824	0.363775	107	16	Dusp3,Bax,Psen2,Dusp6,Psen1,Prkar1a,Hmgcr,Cdkn1a,Rgs2,Dnajc10,Spred1,Fkbp1a,Lyn,Jun,Dusp7,Fabp4	negative regulation of protein phosphorylation	0.651246
GO:0001764	1.3179	0.365465	73	11	Axl,Bax,Ctnnb1,Ndel1,Psen1,Ptk2,Srgap2,Fgf13,Gas6,Plxnb2,Alkbh1	neuron migration	0.653209
GO:0043583	1.27959	0.369063	109	16	Cdh1,Naglu,Rac1,Insig2,Igf1,Bcl2l11,Myo7a,Cebpa,Igfbp7,C1qb,H2-DMa,Rbpj,Pcdh15,Maf,H2-K1,Mafb	ear development	0.658048
GO:0010632	1.61291	0.371758	28	5	Pdpk1,Ctsh,Tgfbr2,Ptprm,Ptk2b	regulation of epithelial cell migration	0.658048
GO:0016052	1.61291	0.371758	28	5	Gm2a,Hexb,Akr1a1,Pgm2l1,Hmgb1	carbohydrate catabolic process	0.658048
GO:0031532	1.61291	0.371758	28	5	Eps8,Parvb,Csf1r,Rap2a,Ptk2b	actin cytoskeleton reorganization	0.658048
GO:0060425	1.61291	0.371758	28	5	Ctnnb1,Ctsz,Igf1,Ctsh,Tgfbr2	lung morphogenesis	0.658048
GO:0090316	1.61291	0.371758	28	5	Prkaca,Rbm22,Camk1,Gas6,Mapk14	positive regulation of intracellular protein transport	0.658048
GO:0071901	1.4142	0.376915	50	8	Dusp3,Dusp6,Hmgcr,Cdkn1a,Rgs2,Spred1,Lyn,Dusp7	negative regulation of protein serine/threonine kinase activity	0.666106
GO:0006576	1.54541	0.382223	29	5	Sptlc2,Sat1,Smox,Fabp5,Lpcat2	cellular biogenic amine metabolic process	0.670108
GO:0021536	1.54541	0.382223	29	5	Bax,Ubc,Creb1,Kdm1a,Rbpj	diencephalon development	0.670108
GO:0042632	1.54541	0.382223	29	5	Apoe,Npc2,Lamtor1,Slc37a4,Fabp4	cholesterol homeostasis	0.670108
GO:0060840	1.54541	0.382223	29	5	Acvrl1,Apoe,Ctnnb1,Rbpj,Lrp1	artery development	0.670108
GO:2000177	1.54541	0.382223	29	5	Ctnnb1,Igf1,Id2,Kdm1a,Ctnna1	regulation of neural precursor cell proliferation	0.670108
GO:0006469	1.31124	0.383555	80	12	Dusp3,Psen2,Dusp6,Psen1,Prkar1a,Hmgcr,Cdkn1a,Rgs2,Spred1,Lyn,Dusp7,Fabp4	negative regulation of protein kinase activity	0.670189
GO:0051098	1.31124	0.383555	80	12	Bax,Mef2c,Cdc42,Psen2,Psen1,Id2,App,Camk1,Aplp2,S100a10,Taf10,Adrb2	regulation of binding	0.670189
GO:0001570	1.38104	0.384096	51	8	Ramp2,Ctnnb1,Sgpl1,Ptk2,Myo1e,Tgfbr2,Pbrm1,Junb	vasculogenesis	0.670189
GO:0060537	1.22319	0.389267	163	23	Mef2c,Cdc42,Ctnnb1,Rhoa,Sirt2,Rxra,Rarb,Prkar1a,Id2,Sav1,Ly6e,Lmna,Ppp3ca,Ski,Atg7,Mef2a,Tsc22d3,Sin3b,Tpm1,Fkbp1a,Rbpj,Plcb1,Mapk14	muscle tissue development	0.678138
GO:0007249	1.27326	0.3942	82	12	Cd36,Ctnnb1,Rhoa,Sqstm1,Litaf,Sharpin,Clec4n,Bcl10,Tlr4,Ikbke,Tifa,Ube2n	I-kappaB kinase/NF-kappaB cascade	0.681593
GO:0006986	1.48331	0.394346	30	5	Bax,Nfe2l2,Derl1,Serp1,Ccnd1	response to unfolded protein	0.681593
GO:0008543	1.48331	0.394346	30	5	Ctnnb1,Dusp6,Fam20c,Rab14,Nptn	fibroblast growth factor receptor signaling pathway	0.681593
GO:0050773	1.48331	0.394346	30	5	Ywhah,Ngef,Camk1,Arf6,Rap2a	regulation of dendrite development	0.681593
GO:0055092	1.48331	0.394346	30	5	Apoe,Npc2,Lamtor1,Slc37a4,Fabp4	sterol homeostasis	0.681593
GO:0070201	1.25142	0.400551	125	18	Ccl3,Cd36,Prkaca,Litaf,Cdkn1a,Clec4n,Rbm22,Tlr2,Clec5a,Camk1,Il4ra,Gas6,Sh3glb1,Lyn,Arf6,AF251705,Mapk14,Kcnn4	regulation of establishment of protein localization	0.691234
GO:0042098	1.30571	0.401835	87	13	Itgb2,Bax,Prdx2,Ctnnb1,Nckap1l,Aif1,Slc11a1,Itgam,Psmb10,Fkbp1a,Il18,Selk,Cxcl12	T cell proliferation	0.692364
GO:0030101	1.42598	0.40792	31	5	Axl,Mertk,Id2,Gas6,Pglyrp3	natural killer cell activation	0.699452
GO:0044344	1.42598	0.40792	31	5	Ctnnb1,Dusp6,Fam20c,Rab14,Nptn	cellular response to fibroblast growth factor stimulus	0.699452
GO:0030155	1.21654	0.409606	128	18	Arpc2,Cyth4,Dab2,Nckap1l,Ptk2,Myo1f,Lpxn,Arl2,Fermt3,Adam8,Hsd17b12,Spp1,L1cam,Rbpj,Il18,Thbs1,Lyn,Ptk2b	regulation of cell adhesion	0.699452
GO:0042326	1.21654	0.409606	128	18	Dusp3,Bax,Psen2,Dusp6,Psen1,Igf1,Prkar1a,Hmgcr,Cdkn1a,Rgs2,Dnajc10,Spred1,Fkbp1a,Tlr4,Lyn,Jun,Dusp7,Fabp4	negative regulation of phosphorylation	0.699452
GO:0007257	1.85331	0.410299	15	3	Dab2,Fgd4,Trf	activation of JUN kinase activity	0.699452
GO:0010259	1.85331	0.410299	15	3	Ctsl,Inpp5d,Serp1	multicellular organismal aging	0.699452
GO:0010721	1.36383	0.411667	58	9	Ctnnb1,Gdi1,Ywhah,Psen1,Id2,Ptk2,Nrp1,Fgf13,Ctnna1	negative regulation of cell development	0.699452
GO:0042633	1.36383	0.411667	58	9	Akt1,Cdc42,Ctnnb1,Psen2,Psen1,Sav1,Myo5a,Rbpj,Mpzl3	hair cycle	0.699452
GO:0050905	1.36383	0.411667	58	9	Gm2a,Hexb,App,Hexa,Cln8,Tpp1,Aplp2,Atxn2,Pcdh15	neuromuscular process	0.699452
GO:0007005	1.23995	0.414747	133	19	Akt1,Bax,Igf1,Timm9,Rrm2b,Sharpin,Atg3,Cox14,Higd2a,Cln8,Hmgcl,Mef2a,Mrpl17,Mtm1,Cebpa,Vat1,Oma1,Sh3glb1,Tefm	mitochondrion organization	0.701118
GO:0045216	1.33628	0.417196	59	9	Cdh1,Rac1,Rhoc,Cdc42,Rhoa,Prkch,Arl2,Ptpro,Ctnna1	cell-cell junction organization	0.701118
GO:0016485	1.21807	0.419512	135	19	Akt1,Bax,Psen2,Atraid,Psen1,Adam8,Bcl10,Furin,Adam9,Ctsh,Trib1,Nlrp3,Oma1,Metap2,Nlrc4,Stub1,Hip1,Lonp2,Aph1c	protein processing	0.701118
GO:0043068	1.20741	0.422565	136	19	Ccl3,Bax,Mef2c,Psen2,Tex261,Rarb,Dusp6,Psen1,Sav1,Cdkn1a,Adam8,Itm2c,Inpp5d,Bcl2l11,Bag1,Arhgef7,Nlrc4,Lyn,Rhob	positive regulation of programmed cell death	0.701118
GO:0055002	1.30982	0.423643	60	9	Mef2c,Prkar1a,Lmna,Ppp3ca,Ski,Atg7,Mef2a,Plcb1,Actg1	striated muscle cell development	0.701118
GO:0051346	1.26883	0.425044	96	14	Akt1,Nckap1l,Arl2,Serpinb8,Rgs2,Spred1,Ecm1,Gas6,Fkbp1a,Atpif1,Serpinb6a,Serpinb2,Fkbp15,Serpinb10	negative regulation of hydrolase activity	0.701118
GO:0002828	1.71047	0.426656	16	3	Cd74,Ecm1,Il4ra	regulation of type 2 immune response	0.701118
GO:0007156	1.71047	0.426656	16	3	L1cam,Nptn,Ptprm	homophilic cell adhesion	0.701118
GO:0010092	1.71047	0.426656	16	3	Mef2c,Ctnnb1,Rbpj	specification of organ identity	0.701118
GO:0010594	1.71047	0.426656	16	3	Pdpk1,Ptprm,Ptk2b	regulation of endothelial cell migration	0.701118
GO:0021680	1.71047	0.426656	16	3	Naglu,Atg7,Atxn2	cerebellar Purkinje cell layer development	0.701118
GO:0022904	1.71047	0.426656	16	3	Sdha,Sdhaf2,Slc37a2	respiratory electron transport chain	0.701118
GO:0042596	1.71047	0.426656	16	3	Mef2c,Vdac1,Penk	fear response	0.701118
GO:0046579	1.71047	0.426656	16	3	Map2k1,Hras,Nras	positive regulation of Ras protein signal transduction	0.701118
GO:0048169	1.71047	0.426656	16	3	Hras,Nras,Nptn	regulation of long-term neuronal synaptic plasticity	0.701118
GO:0050848	1.71047	0.426656	16	3	Ccl3,L1cam,Ptk2b	regulation of calcium-mediated signaling	0.701118
GO:0060441	1.71047	0.426656	16	3	Ctnnb1,Ctsz,Ctsh	epithelial tube branching involved in lung morphogenesis	0.701118
GO:0060716	1.71047	0.426656	16	3	Akt1,Rbpj,Junb	labyrinthine layer blood vessel development	0.701118
GO:0060749	1.71047	0.426656	16	3	Id2,Tnfrsf11a,Ccnd1	mammary gland alveolus development	0.701118
GO:0061377	1.71047	0.426656	16	3	Id2,Tnfrsf11a,Ccnd1	mammary gland lobule development	0.701118
GO:0071453	1.71047	0.426656	16	3	Adam8,Lmna,Gnb1	cellular response to oxygen levels	0.701118
GO:0071456	1.71047	0.426656	16	3	Adam8,Lmna,Gnb1	cellular response to hypoxia	0.701118
GO:0061351	1.28438	0.430948	61	9	Ctnnb1,Igf1,Id2,Zeb2,Fgf13,Plxnb2,Kdm1a,Ctnna1,Tacc1	neural precursor cell proliferation	0.702362
GO:0001909	1.48404	0.432799	36	6	Fcgr1,Ctsc,Ctsh,Fcgr3,H2-K1,H2-D1	leukocyte mediated cytotoxicity	0.702362
GO:0002821	1.48404	0.432799	36	6	Fcgr1,Slc11a1,Fcer1g,Fcgr3,H2-K1,H2-D1	positive regulation of adaptive immune response	0.702362
GO:0030833	1.48404	0.432799	36	6	Rac1,Arpc2,Twf1,Nckap1l,Mtpn,Ptk2b	regulation of actin filament polymerization	0.702362
GO:0007169	1.16823	0.436315	199	27	Insr,Ctnnb1,Psen2,Dusp6,Psen1,Igf1,Sgpl1,Dok2,Ptk2,App,Csf1r,Nrp1,Fam20c,Ngef,Rab14,Ptpra,Flt1,Aplp2,Myo1e,Nptn,Smarcc1,Txnip,Rbpj,Lrp1,Myof,Plcb1,Ptk2b	transmembrane receptor protein tyrosine kinase signaling pathway	0.702362
GO:0002761	1.43588	0.439651	37	6	Tfe3,Ccl3,Ctnnb1,Id2,Inpp5d,Lyn	regulation of myeloid leukocyte differentiation	0.702362
[truncated: 425 more rows]

## Sheet: 114h up hallmark
	odds.ratio	p.value	n.categoy	n.category.and.component	genes	FDR
[truncated: 33 more rows]

[truncated: 26 more sheets: D2 up GO, D2 up hallmark, D4 up GO, D4 up hallmark, D6 up GO, D6 up hallmark, D8 up GO, D8 up hallmark, 6h down GO, 6h down hallmark, 18h down GO, 18h down hallmark, 42h down GO, 42h down hallmark, 66h down GO, 66h down hallmark, 114h down GO, 114 down hallmark, D2 down GO, D2 down hallmark …]
