# Supplementary material for: Single cell RNA-seq identifies the origins of heterogeneity in efficient cell transdifferentiation and reprogramming
Source: eLife. 2019 Mar 12;8:e41627. doi: 10.7554/eLife.41627 (PMC6435319; doi:10.7554/eLife.41627)
Supplement: Supplementary file 7. [file elife-41627-supp7.xlsx]

## Sheet: cl 1 transdiff GO
	odds.ratio	p.value	n.categoy	n.category.and.component	genes	description	FDR
GO:0042113	6.65611	8.20943e-08	116	15	Bcl11a,Tgfb1,Cd79a,Ikzf1,Tcf3,Syk,Lef1,Foxp1,Pik3cd,Cd24a,Lig4,Vpreb2,Vpreb1,Tnfrsf13c,Gimap1	B cell activation	6.81382e-05
GO:0033151	42.024	1.70113e-06	10	5	Tcf3,Xrcc6,Lef1,Foxp1,Lig4	V(D)J recombination	0.000705968
GO:0030098	4.472	3.87048e-06	176	16	Lck,Bcl11a,Tgfb1,Cd79a,Ikzf1,Tcf3,Syk,Ptpn22,Lef1,Foxp1,Cbfb,Ly6d,Cd24a,Lig4,Spn,Gimap1	lymphocyte differentiation	0.000886348
GO:0032943	5.30053	5.33945e-06	121	13	Tgfb1,Cd79a,Impdh1,Tcf3,Syk,Ptpn22,Lef1,Ccnd3,Cd24a,Spn,Vpreb2,Vpreb1,Tnfrsf13c	mononuclear cell proliferation	0.000886348
GO:0046651	5.30053	5.33945e-06	121	13	Tgfb1,Cd79a,Impdh1,Tcf3,Syk,Ptpn22,Lef1,Ccnd3,Cd24a,Spn,Vpreb2,Vpreb1,Tnfrsf13c	lymphocyte proliferation	0.000886348
GO:0070661	5.10771	7.67547e-06	125	13	Tgfb1,Cd79a,Impdh1,Tcf3,Syk,Ptpn22,Lef1,Ccnd3,Cd24a,Spn,Vpreb2,Vpreb1,Tnfrsf13c	leukocyte proliferation	0.00106177
GO:0050851	7.78109	2.78524e-05	52	8	Lck,Cd79a,Syk,Ptpn22,Cd19,Elf1,Cd79b,Prkd2	antigen receptor-mediated signaling pathway	0.0033025
GO:0042100	8.26748	6.19e-05	43	7	Cd79a,Tcf3,Lef1,Cd24a,Vpreb2,Vpreb1,Tnfrsf13c	B cell proliferation	0.00642212
GO:0050853	13.9948	8.61981e-05	20	5	Lck,Cd79a,Syk,Cd19,Cd79b	B cell receptor signaling pathway	0.00707215
GO:0022407	9.7505	9.32477e-05	32	6	Tgfb1,Syk,Kifap3,Lef1,Dennd6a,Cd24a	regulation of cell-cell adhesion	0.00707215
GO:0002768	6.32905	0.000102248	62	8	Lck,Cd79a,Syk,Ptpn22,Cd19,Elf1,Cd79b,Prkd2	immune response-regulating cell surface receptor signaling pathway	0.00707215
GO:0030183	6.32905	0.000102248	62	8	Bcl11a,Cd79a,Ikzf1,Tcf3,Syk,Foxp1,Cd24a,Gimap1	B cell differentiation	0.00707215
GO:0016444	9.05252	0.000133033	34	6	Tgfb1,Tcf3,Xrcc6,Lef1,Foxp1,Lig4	somatic cell DNA recombination	0.00849367
GO:0002377	7.07843	0.000146342	49	7	Tgfb1,Tcf3,Mzb1,Foxp1,Cd37,Lig4,Vpreb1	immunoglobulin production	0.00867598
GO:0030217	4.21464	0.000171091	124	11	Lck,Bcl11a,Tgfb1,Ikzf1,Tcf3,Syk,Ptpn22,Lef1,Lig4,Spn,Gimap1	T cell differentiation	0.00946706
GO:0050778	3.72269	0.000261254	152	12	Lck,Cd79a,Syk,Ptpn22,Cd19,Elf1,Tap1,Cd79b,Prkd2,Cd24a,Tnfrsf13c,Tnip1	positive regulation of immune response	0.0135526
GO:0002764	4.32745	0.000525573	98	9	Lck,Cd79a,Syk,Ptpn22,Cd19,Elf1,Cd79b,Prkd2,Tnip1	immune response-regulating signaling pathway	0.0256603
GO:0050863	3.76693	0.000729879	124	10	Lck,Tgfb1,Ikzf1,Syk,Pag1,Ptpn22,Dpp4,Cd24a,Spn,Tnfrsf13c	regulation of T cell activation	0.0327854
GO:0050856	11.9164	0.000750509	18	4	Lck,Ptpn22,Elf1,Prkd2	regulation of T cell receptor signaling pathway	0.0327854
GO:0002253	4.04993	0.000812584	104	9	Lck,Cd79a,Syk,Ptpn22,Cd19,Elf1,Cd79b,Prkd2,Tnip1	activation of immune response	0.0337222
GO:0051251	3.92388	0.000997933	107	9	Lck,Tgfb1,Ikzf1,Tcf3,Syk,Dpp4,Cd24a,Spn,Tnfrsf13c	positive regulation of lymphocyte activation	0.0394421
GO:0002637	9.26142	0.00166519	22	4	Tgfb1,Mzb1,Foxp1,Cd37	regulation of immunoglobulin production	0.062823
GO:0042742	5.05162	0.00208383	56	6	Syk,Plac8,Scd1,Gbp7,Spn,Irgm2	defense response to bacterium	0.0751991
GO:0050870	4.22785	0.00234503	77	7	Lck,Ikzf1,Syk,Dpp4,Cd24a,Spn,Tnfrsf13c	positive regulation of T cell activation	0.0782464
GO:0048872	3.16863	0.00240583	145	10	Tgfb1,Hcls1,Ets1,Smarca4,Pik3cd,Cd24a,Chst3,Vpreb2,Vpreb1,Tnfrsf13c	homeostasis of number of cells	0.0782464
GO:0006303	13.7991	0.00254537	12	3	Dek,Xrcc6,Lig4	double-strand break repair via nonhomologous end joining	0.0782464
GO:0022409	13.7991	0.00254537	12	3	Kifap3,Dennd6a,Cd24a	positive regulation of cell-cell adhesion	0.0782464
GO:0002260	5.65814	0.00309581	42	5	Tgfb1,Pik3cd,Cd24a,Chst3,Tnfrsf13c	lymphocyte homeostasis	0.0917686
GO:0001562	12.421	0.00325121	13	3	Gbp7,Spn,Irgm2	response to protozoan	0.092315
GO:0050868	5.50741	0.0034367	43	5	Tgfb1,Pag1,Ptpn22,Cd24a,Spn	negative regulation of T cell activation	0.092315
GO:0030155	3.2191	0.00347086	128	9	Tgfb1,Cyth1,Syk,Kifap3,Lef1,Dennd6a,Prkd2,Cd24a,Spn	regulation of cell adhesion	0.092315
GO:0009617	2.98698	0.00355913	153	10	Plscr3,Tcf3,Syk,Prdx3,Plac8,Scd1,Gbp7,Cd24a,Spn,Irgm2	response to bacterium	0.092315
GO:0048535	11.2914	0.00406575	14	3	Tgfb1,Ikzf1,Cxcr5	lymph node development	0.10226
GO:0016447	6.66163	0.00474771	29	4	Tgfb1,Tcf3,Foxp1,Lig4	somatic recombination of immunoglobulin gene segments	0.113731
GO:0002699	4.20249	0.00479588	66	6	Tgfb1,Syk,Foxp1,Cd37,Tap1,Cd24a	positive regulation of immune effector process	0.113731
GO:0006917	3.60086	0.00529688	89	7	Lck,Tgfb1,Serinc3,Ikbip,Tgfb3,Lef1,Sh3glb1	induction of apoptosis	0.122122
GO:0002250	3.2258	0.0055539	113	8	Tgfb1,Syk,Lef1,Tap1,Cd24a,Lig4,Spn,Tnfrsf13c	adaptive immune response	0.124583
GO:0048864	2.96414	0.00570382	138	9	Tgfb1,Stat3,Trim28,Tgfb3,Smc3,Lef1,Smarca4,Smc1a,Lig4	stem cell development	0.124583
GO:0050671	4.54392	0.00719801	51	5	Tcf3,Syk,Cd24a,Spn,Tnfrsf13c	positive regulation of lymphocyte proliferation	0.14952
GO:0060325	8.86958	0.00720576	17	3	Tgfb1,Tgfb3,Lef1	face morphogenesis	0.14952
GO:0051153	5.54799	0.00845198	34	4	Tgfb1,Rbm38,Ezh2,Foxp1	regulation of striated muscle cell differentiation	0.171101
GO:0001776	4.26359	0.00915237	54	5	Tgfb1,Pik3cd,Cd24a,Chst3,Tnfrsf13c	leukocyte homeostasis	0.176718
GO:0050852	5.36701	0.0093682	35	4	Lck,Ptpn22,Elf1,Prkd2	T cell receptor signaling pathway	0.176718
GO:0050871	5.36701	0.0093682	35	4	Tgfb1,Tcf3,Syk,Tnfrsf13c	positive regulation of B cell activation	0.176718
GO:0007259	5.19871	0.0103468	36	4	Lck,Stat3,Socs2,Hcls1	JAK-STAT cascade	0.190841
GO:0042102	5.04044	0.0113893	37	4	Syk,Cd24a,Spn,Tnfrsf13c	positive regulation of T cell proliferation	0.198209
GO:0060323	7.30038	0.0114627	20	3	Tgfb1,Tgfb3,Lef1	head morphogenesis	0.198209
GO:0060324	7.30038	0.0114627	20	3	Tgfb1,Tgfb3,Lef1	face development	0.198209
GO:0002460	3.03608	0.0121461	104	7	Tgfb1,Lef1,Tap1,Cd24a,Lig4,Spn,Tnfrsf13c	adaptive immune response based on somatic recombination of immune receptors built from immunoglobulin superfamily domains	0.203386
GO:0045785	3.93939	0.0122898	58	5	Syk,Kifap3,Dennd6a,Prkd2,Cd24a	positive regulation of cell adhesion	0.203386
GO:0001837	4.89209	0.0124972	38	4	Tgfb1,Trim28,Tgfb3,Lef1	epithelial to mesenchymal transition	0.203386
GO:0035303	3.79495	0.0141029	60	5	Tgfb1,Nifk,Igbp1,Gpatch2,Ppp6r1	regulation of dephosphorylation	0.225104
GO:0048863	2.50486	0.0149554	161	9	Tgfb1,Stat3,Trim28,Tgfb3,Smc3,Lef1,Smarca4,Smc1a,Lig4	stem cell differentiation	0.234207
GO:0051250	3.66074	0.016088	62	5	Tgfb1,Pag1,Ptpn22,Cd24a,Spn	negative regulation of lymphocyte activation	0.244869
GO:0050731	4.49247	0.0162263	41	4	Lck,Syk,Hcls1,Cd24a	positive regulation of peptidyl-tyrosine phosphorylation	0.244869
GO:0043029	6.20401	0.0169002	23	3	Tgfb1,Cd24a,Chst3	T cell homeostasis	0.249367
GO:0042129	3.59634	0.0171471	63	5	Tgfb1,Syk,Cd24a,Spn,Tnfrsf13c	regulation of T cell proliferation	0.249367
GO:0055088	4.37425	0.0176084	42	4	Plscr3,Ldlr,Cd24a,Fitm2	lipid homeostasis	0.249367
GO:0042098	3.10139	0.0177261	87	6	Tgfb1,Syk,Ccnd3,Cd24a,Spn,Tnfrsf13c	T cell proliferation	0.249367
GO:0030099	2.40719	0.0185876	167	9	Tgfb1,Spib,Ikzf1,Hcls1,Prdx3,Lef1,Cbfb,Ets1,Smarca4	myeloid cell differentiation	0.257129
GO:0002819	3.4755	0.019402	65	5	Tgfb1,Tap1,Cd24a,Spn,Tnfrsf13c	regulation of adaptive immune response	0.263994
GO:0042130	5.63863	0.0211986	25	3	Tgfb1,Cd24a,Spn	negative regulation of T cell proliferation	0.269469
GO:0046425	5.63863	0.0211986	25	3	Lck,Socs2,Hcls1	regulation of JAK-STAT cascade	0.269469
GO:0010595	10.279	0.0227246	10	2	Tgfb1,Prkd2	positive regulation of endothelial cell migration	0.269469
GO:0010718	10.279	0.0227246	10	2	Tgfb1,Tgfb3	positive regulation of epithelial to mesenchymal transition	0.269469
GO:0042832	10.279	0.0227246	10	2	Gbp7,Irgm2	defense response to protozoan	0.269469
GO:0050860	10.279	0.0227246	10	2	Ptpn22,Elf1	negative regulation of T cell receptor signaling pathway	0.269469
GO:0060389	10.279	0.0227246	10	2	Tgfb1,Tgfb3	pathway-restricted SMAD protein phosphorylation	0.269469
GO:0071158	10.279	0.0227246	10	2	Tgfb1,Uhrf2	positive regulation of cell cycle arrest	0.269469
GO:0006310	2.91846	0.0227263	92	6	Tgfb1,Tcf3,Xrcc6,Lef1,Foxp1,Lig4	DNA recombination	0.269469
GO:0051147	3.95452	0.0238597	46	4	Tgfb1,Rbm38,Ezh2,Foxp1	regulation of muscle cell differentiation	0.278923
GO:0022408	9.13688	0.0273428	11	2	Tgfb1,Cd24a	negative regulation of cell-cell adhesion	0.306682
GO:0045843	9.13688	0.0273428	11	2	Tgfb1,Lef1	negative regulation of striated muscle tissue development	0.306682
GO:0048745	9.13688	0.0273428	11	2	Eng,Foxp1	smooth muscle tissue development	0.306682
GO:0010171	4.95915	0.028665	28	3	Tgfb1,Tgfb3,Lef1	body morphogenesis	0.317225
GO:0042632	4.76832	0.0314246	29	3	Plscr3,Ldlr,Cd24a	cholesterol homeostasis	0.338733
GO:0060322	4.76832	0.0314246	29	3	Tgfb1,Tgfb3,Lef1	head development	0.338733
GO:0050850	8.22304	0.0323023	12	2	Syk,Cd24a	positive regulation of calcium-mediated signaling	0.339378
GO:0071156	8.22304	0.0323023	12	2	Tgfb1,Uhrf2	regulation of cell cycle arrest	0.339378
GO:0046635	4.59021	0.0343187	30	3	Ikzf1,Syk,Cd24a	positive regulation of alpha-beta T cell activation	0.351661
GO:0055092	4.59021	0.0343187	30	3	Plscr3,Ldlr,Cd24a	sterol homeostasis	0.351661
GO:0006302	2.93131	0.0352716	76	5	Baz1b,Dek,Xrcc6,Lig4,Rnf169	double-strand break repair	0.355479
GO:0030101	4.42608	0.0373463	31	3	Ikzf1,Tcf3,Ptpn22	natural killer cell activation	0.355479
GO:0042108	4.42608	0.0373463	31	3	Syk,Spn,Tnfrsf13c	positive regulation of cytokine biosynthetic process	0.355479
GO:0033628	7.47603	0.0375843	13	2	Syk,Cd24a	regulation of cell adhesion mediated by integrin	0.355479
GO:0042531	7.47603	0.0375843	13	2	Lck,Hcls1	positive regulation of tyrosine phosphorylation of STAT protein	0.355479
GO:0016573	3.38546	0.0376893	53	4	Tgfb1,Tcf3,Wdr5,Smarca4	histone acetylation	0.355479
GO:0018393	3.38546	0.0376893	53	4	Tgfb1,Tcf3,Wdr5,Smarca4	internal peptidyl-lysine acetylation	0.355479
GO:0002456	4.27258	0.0405063	32	3	Tap1,Cd24a,Spn	T cell mediated immunity	0.360771
GO:0050672	4.27258	0.0405063	32	3	Tgfb1,Cd24a,Spn	negative regulation of lymphocyte proliferation	0.360771
GO:0019827	2.81098	0.040673	79	5	Stat3,Smc3,Smarca4,Smc1a,Lig4	stem cell maintenance	0.360771
GO:0000060	6.85088	0.0431707	14	2	Tgfb1,Arntl	protein import into nucleus, translocation	0.360771
GO:0002902	6.85088	0.0431707	14	2	Cd24a,Hsh2d	regulation of B cell apoptotic process	0.360771
GO:0010717	6.85088	0.0431707	14	2	Tgfb1,Tgfb3	regulation of epithelial to mesenchymal transition	0.360771
GO:0030851	6.85088	0.0431707	14	2	Ikzf1,Lef1	granulocyte differentiation	0.360771
GO:0040015	6.85088	0.0431707	14	2	Socs2,Plac8	negative regulation of multicellular organism growth	0.360771
GO:0060216	6.85088	0.0431707	14	2	Cbfb,Smarca4	definitive hemopoiesis	0.360771
GO:0017015	4.12971	0.0437973	33	3	Tgfb1,Glg1,Eng	regulation of transforming growth factor beta receptor signaling pathway	0.360771
GO:0030888	4.12971	0.0437973	33	3	Tcf3,Cd24a,Tnfrsf13c	regulation of B cell proliferation	0.360771
GO:0070664	4.12971	0.0437973	33	3	Tgfb1,Cd24a,Spn	negative regulation of leukocyte proliferation	0.360771
GO:0001817	2.14119	0.0443593	186	9	Tgfb1,Syk,Lef1,Elf1,Prkd2,Cd24a,Spn,Tnfrsf13c,Vimp	regulation of cytokine production	0.360771
GO:0006475	3.18847	0.0447703	56	4	Tgfb1,Tcf3,Wdr5,Smarca4	internal protein amino acid acetylation	0.360771
GO:0018394	3.18847	0.0447703	56	4	Tgfb1,Tcf3,Wdr5,Smarca4	peptidyl-lysine acetylation	0.360771
GO:0007162	3.99587	0.0472178	34	3	Tgfb1,Cd24a,Spn	negative regulation of cell adhesion	0.376834
GO:0007257	6.3232	0.0490441	15	2	Map2k7,Syk	activation of JUN kinase activity	0.380435
GO:0046633	6.3232	0.0490441	15	2	Syk,Cd24a	alpha-beta T cell proliferation	0.380435
GO:0060428	6.3232	0.0490441	15	2	Foxp1,Numa1	lung epithelium development	0.380435
GO:0040014	3.0693	0.0498777	58	4	Stat3,Ikzf1,Socs2,Plac8	regulation of multicellular organism growth	0.383319
GO:0002683	2.35925	0.0519375	112	6	Tgfb1,Pag1,Ptpn22,Elf1,Cd24a,Spn	negative regulation of immune system process	0.395487
GO:0002821	3.75269	0.0544407	36	3	Tap1,Cd24a,Tnfrsf13c	positive regulation of adaptive immune response	0.398311
GO:0043542	3.75269	0.0544407	36	3	Tgfb1,Dpp4,Prkd2	endothelial cell migration	0.398311
GO:0010594	5.87086	0.0551876	16	2	Tgfb1,Prkd2	regulation of endothelial cell migration	0.398311
GO:0043966	5.87086	0.0551876	16	2	Tcf3,Smarca4	histone H3 acetylation	0.398311
GO:0050848	5.87086	0.0551876	16	2	Syk,Cd24a	regulation of calcium-mediated signaling	0.398311
GO:0051329	5.87086	0.0551876	16	2	Tcf3,Ezh2	interphase of mitotic cell cycle	0.398311
GO:0002443	2.29307	0.0576849	115	6	Tgfb1,Syk,Tap1,Cd24a,Lig4,Spn	leukocyte mediated immunity	0.409467
GO:0046631	2.85563	0.0610138	62	4	Ikzf1,Syk,Lef1,Cd24a	alpha-beta T cell activation	0.409467
GO:0001783	5.47805	0.0615852	17	2	Cd24a,Hsh2d	B cell apoptotic process	0.409467
GO:0015844	5.47805	0.0615852	17	2	Syk,Ly6e	monoamine transport	0.409467
GO:0043627	5.47805	0.0615852	17	2	Tgfb1,Cd24a	response to estrogen stimulus	0.409467
GO:0045921	5.47805	0.0615852	17	2	Exoc2,Syk	positive regulation of exocytosis	0.409467
GO:0046427	5.47805	0.0615852	17	2	Lck,Hcls1	positive regulation of JAK-STAT cascade	0.409467
GO:0060669	5.47805	0.0615852	17	2	Trim28,Lef1	embryonic placenta morphogenesis	0.409467
GO:0006606	2.47177	0.0621442	89	5	Tgfb1,Stat3,Tgfb3,Pkig,Arntl	protein import into nucleus	0.409467
GO:0034968	3.53678	0.0621601	38	3	Pax5,Wdr5,Ezh2	histone lysine methylation	0.409467
GO:0045582	3.53678	0.0621601	38	3	Lck,Ikzf1,Syk	positive regulation of T cell differentiation	0.409467
GO:0006473	2.80673	0.0639878	63	4	Tgfb1,Tcf3,Wdr5,Smarca4	protein acetylation	0.413311
GO:0002062	3.43799	0.0662007	39	3	Mef2d,Tgfb1,Glg1	chondrocyte differentiation	0.413311
GO:0051170	2.4135	0.0670824	91	5	Tgfb1,Stat3,Tgfb3,Pkig,Arntl	nuclear import	0.413311
GO:0060541	2.19053	0.0680842	120	6	Tgfb3,Pou2f1,Lef1,Cux1,Foxp1,Numa1	respiratory system development	0.413311
GO:0001779	5.13561	0.0682213	18	2	Ikzf1,Tcf3	natural killer cell differentiation	0.413311
GO:0001958	5.13561	0.0682213	18	2	Mef2d,Alpl	endochondral ossification	0.413311
GO:0002711	5.13561	0.0682213	18	2	Tap1,Cd24a	positive regulation of T cell mediated immunity	0.413311
GO:0010634	5.13561	0.0682213	18	2	Tgfb1,Prkd2	positive regulation of epithelial cell migration	0.413311
GO:0033627	5.13561	0.0682213	18	2	Syk,Cd24a	cell adhesion mediated by integrin	0.413311
GO:0048146	5.13561	0.0682213	18	2	Zmiz1,Lig4	positive regulation of fibroblast proliferation	0.413311
GO:0051149	5.13561	0.0682213	18	2	Tgfb1,Foxp1	positive regulation of muscle cell differentiation	0.413311
GO:0014031	2.71363	0.0701605	65	4	Tgfb1,Trim28,Tgfb3,Lef1	mesenchymal cell development	0.42198
GO:0006338	3.25592	0.0746327	41	3	Baz1b,Smarca4,Top1	chromatin remodeling	0.432758
GO:0060349	3.25592	0.0746327	41	3	Mef2d,Glg1,Alpl	bone morphogenesis	0.432758
GO:0001959	4.83333	0.0750808	19	2	Zbp1,Cd24a	regulation of cytokine-mediated signaling pathway	0.432758
GO:0003401	4.83333	0.0750808	19	2	Tgfb1,Trim28	axis elongation	0.432758
GO:0007159	4.83333	0.0750808	19	2	Syk,Cd24a	leukocyte cell-cell adhesion	0.432758
GO:0007260	4.83333	0.0750808	19	2	Lck,Hcls1	tyrosine phosphorylation of STAT protein	0.432758
GO:0017038	2.30461	0.0775975	95	5	Tgfb1,Stat3,Tgfb3,Pkig,Arntl	protein import	0.444179
GO:0007157	4.56337	0.0821495	20	2	Lgals9,Cd24a	heterophilic cell-cell adhesion	0.460703
GO:0030890	4.56337	0.0821495	20	2	Tcf3,Tnfrsf13c	positive regulation of B cell proliferation	0.460703
GO:0045577	4.56337	0.0821495	20	2	Syk,Cd24a	regulation of B cell differentiation	0.460703
GO:0060485	2.25385	0.083171	97	5	Tgfb1,Trim28,Tgfb3,Eng,Lef1	mesenchyme development	0.461408
GO:0050730	2.54496	0.0833871	69	4	Lck,Syk,Hcls1,Cd24a	regulation of peptidyl-tyrosine phosphorylation	0.461408
GO:0090068	3.01613	0.0881205	44	3	Tgfb1,Rock2,Uhrf2	positive regulation of cell cycle process	0.481904
GO:0001782	4.32293	0.0894135	21	2	Pik3cd,Tnfrsf13c	B cell homeostasis	0.481904
GO:0034341	4.32293	0.0894135	21	2	Gbp7,Irgm2	response to interferon-gamma	0.481904
GO:0045058	4.32293	0.0894135	21	2	Syk,Spn	T cell selection	0.481904
GO:0048762	2.46797	0.0904292	71	4	Tgfb1,Trim28,Tgfb3,Lef1	mesenchymal cell differentiation	0.484234
GO:0001818	2.94381	0.0928301	45	3	Lef1,Cd24a,Vimp	negative regulation of cytokine production	0.484877
GO:0042306	2.94381	0.0928301	45	3	Tgfb1,Tgfb3,Pkig	regulation of protein import into nucleus	0.484877
GO:0045621	2.94381	0.0928301	45	3	Lck,Ikzf1,Syk	positive regulation of lymphocyte differentiation	0.484877
GO:0010720	2.4313	0.0940545	72	4	Tgfb1,Tgfb3,Xrcc6,Lig4	positive regulation of cell development	0.484877
GO:0018205	2.4313	0.0940545	72	4	Tgfb1,Tcf3,Wdr5,Smarca4	peptidyl-lysine modification	0.484877
GO:0034101	2.4313	0.0940545	72	4	Hcls1,Ets1,Smarca4,Cd24a	erythrocyte homeostasis	0.484877
GO:0042035	2.87486	0.097642	46	3	Syk,Spn,Tnfrsf13c	regulation of cytokine biosynthetic process	0.500264
GO:0042692	1.97138	0.100483	155	7	Tgfb1,Bin1,Rbm38,Lef1,Ezh2,Foxp1,Smarca4	muscle cell differentiation	0.510082
GO:0043406	2.36105	0.101509	74	4	Tgfb1,Map2k7,Syk,Cd24a	positive regulation of MAP kinase activity	0.510082
GO:0016202	2.80904	0.102553	47	3	Tgfb1,Lef1,Foxp1	regulation of striated muscle tissue development	0.510082
GO:0002204	3.91013	0.104475	23	2	Tgfb1,Lig4	somatic recombination of immunoglobulin genes involved in immune response	0.510082
GO:0002437	3.91013	0.104475	23	2	Cd24a,Spn	inflammatory response to antigenic stimulus	0.510082
GO:0006282	3.91013	0.104475	23	2	Dek,Rnf169	regulation of DNA repair	0.510082
GO:0045190	3.91013	0.104475	23	2	Tgfb1,Lig4	isotype switching	0.510082
GO:0046638	3.91013	0.104475	23	2	Ikzf1,Syk	positive regulation of alpha-beta T cell differentiation	0.510082
GO:0051146	2.07048	0.107512	105	5	Tgfb1,Rbm38,Lef1,Ezh2,Foxp1	striated muscle cell differentiation	0.519027
GO:0042476	2.74614	0.107562	48	3	Tgfb1,Id3,Lef1	odontogenesis	0.519027
GO:0006281	1.90521	0.108846	160	7	Baz1b,Dek,Xrcc6,Trp53bp1,Lig4,Xrcc1,Rnf169	DNA repair	0.519027
GO:0002028	3.73204	0.112247	24	2	Tgfb1,Camk2d	regulation of sodium ion transport	0.519027
GO:0006611	3.73204	0.112247	24	2	Tgfb1,Strada	protein export from nucleus	0.519027
GO:0034109	3.73204	0.112247	24	2	Syk,Cd24a	homotypic cell-cell adhesion	0.519027
GO:0045453	3.73204	0.112247	24	2	Syk,Cbl	bone resorption	0.519027
GO:0050873	3.73204	0.112247	24	2	Plac8,Scd1	brown fat cell differentiation	0.519027
GO:0046632	2.68587	0.112664	49	3	Ikzf1,Syk,Lef1	alpha-beta T cell differentiation	0.519027
GO:0019216	2.26269	0.113185	77	4	Tgfb1,Sf1,Scd1,Fitm2	regulation of lipid metabolic process	0.519027
GO:0045619	2.26269	0.113185	77	4	Lck,Ikzf1,Syk,Cd24a	regulation of lymphocyte differentiation	0.519027
GO:0046034	2.62823	0.117857	50	3	Tgfb1,Dld,Smarca4	ATP metabolic process	0.53748
GO:0019218	3.5688	0.120164	25	2	Sf1,Scd1	regulation of steroid metabolic process	0.542044
GO:0048844	3.5688	0.120164	25	2	Zmiz1,Eng	artery morphogenesis	0.542044
GO:0001570	2.57317	0.123138	51	3	Zmiz1,Eng,Smarca4	vasculogenesis	0.552459
GO:0016570	1.80776	0.124542	168	7	Tgfb1,Baz1b,Pax5,Tcf3,Wdr5,Ezh2,Smarca4	histone modification	0.553757
GO:0001649	2.17234	0.125429	80	4	Mef2d,Id3,Lef1,Cbfb	osteoblast differentiation	0.553757
GO:0030879	2.17234	0.125429	80	4	Tgfb1,Socs2,Tgfb3,Lef1	mammary gland development	0.553757
GO:0010830	3.41965	0.128215	26	2	Tgfb1,Rbm38	regulation of myotube differentiation	0.555516
GO:0045766	3.41965	0.128215	26	2	Eng,Prkd2	positive regulation of angiogenesis	0.555516
GO:0061035	3.41965	0.128215	26	2	Tgfb1,Glg1	regulation of cartilage development	0.555516
GO:0010921	2.52027	0.128505	52	3	Nifk,Gpatch2,Ppp6r1	regulation of phosphatase activity	0.555516
GO:0010631	2.46923	0.133954	53	3	Tgfb1,Dpp4,Prkd2	epithelial cell migration	0.566014
GO:0033077	2.46923	0.133954	53	3	Tcf3,Lig4,Spn	T cell differentiation in thymus	0.566014
GO:0016337	1.97752	0.136039	132	6	Tgfb1,Syk,Kifap3,Lef1,Dennd6a,Cd24a	cell-cell adhesion	0.566014
GO:0001569	3.28232	0.136389	27	2	Eng,Lef1	patterning of blood vessels	0.566014
GO:0002381	3.28232	0.136389	27	2	Tgfb1,Lig4	immunoglobulin production involved in immunoglobulin mediated immune response	0.566014
GO:0006275	3.28232	0.136389	27	2	Tgfb1,Smc3	regulation of DNA replication	0.566014
GO:0043507	3.28232	0.136389	27	2	Map2k7,Syk	positive regulation of JUN kinase activity	0.566014
GO:0051101	3.28232	0.136389	27	2	Tgfb1,Smarca4	regulation of DNA binding	0.566014
GO:0006397	2.08869	0.13821	83	4	Celf2,Son,Cpsf6,Snrnp70	mRNA processing	0.570297
GO:0009165	2.42047	0.139482	54	3	Tgfb1,Impdh1,Gmds	nucleotide biosynthetic process	0.570297
GO:0016571	2.42047	0.139482	54	3	Pax5,Wdr5,Ezh2	histone methylation	0.570297
GO:0002573	2.06216	0.142583	84	4	Tgfb1,Spib,Ikzf1,Lef1	myeloid leukocyte differentiation	0.576183
GO:0010632	3.15555	0.144675	28	2	Tgfb1,Prkd2	regulation of epithelial cell migration	0.576183
GO:0032835	3.15555	0.144675	28	2	Enpep,Cd24a	glomerulus development	0.576183
GO:0060350	3.15555	0.144675	28	2	Mef2d,Alpl	endochondral bone morphogenesis	0.576183
GO:0042089	2.37354	0.145087	55	3	Syk,Spn,Tnfrsf13c	cytokine biosynthetic process	0.576183
GO:0042107	2.37354	0.145087	55	3	Syk,Spn,Tnfrsf13c	cytokine metabolic process	0.576183
GO:0001934	1.736	0.150531	200	8	Lck,Tgfb1,Map2k7,Tgfb3,Syk,Hcls1,Cd24a,Strada	positive regulation of protein phosphorylation	0.591247
GO:0002366	2.01119	0.151493	86	4	Tgfb1,Syk,Lef1,Lig4	leukocyte activation involved in immune response	0.591247
GO:0006260	2.01119	0.151493	86	4	Tgfb1,Smc3,Lig4,Top1	DNA replication	0.591247
GO:0007405	3.03818	0.153064	29	2	Lef1,Cd24a	neuroblast proliferation	0.591247
GO:0060840	3.03818	0.153064	29	2	Zmiz1,Eng	artery development	0.591247
GO:0006913	1.8427	0.153826	141	6	Tgfb1,Stat3,Tgfb3,Pkig,Arntl,Strada	nucleocytoplasmic transport	0.591247
GO:0009913	2.28483	0.156514	57	3	Ezh2,Cux1,Smarca4	epidermal cell differentiation	0.591247
GO:0010212	2.28483	0.156514	57	3	Ikbip,Xrcc6,Lig4	response to ionizing radiation	0.591247
GO:0060348	2.28483	0.156514	57	3	Mef2d,Glg1,Alpl	bone development	0.591247
GO:0002262	1.9626	0.160611	88	4	Hcls1,Ets1,Smarca4,Cd24a	myeloid cell homeostasis	0.591247
GO:0016311	1.8015	0.160795	144	6	Tgfb1,Nifk,Ptpn22,Igbp1,Gpatch2,Ppp6r1	dephosphorylation	0.591247
GO:0045639	2.92919	0.161546	30	2	Ikzf1,Ets1	positive regulation of myeloid cell differentiation	0.591247
GO:0050830	2.92919	0.161546	30	2	Scd1,Gbp7	defense response to Gram-positive bacterium	0.591247
GO:0045580	2.24304	0.162331	58	3	Lck,Ikzf1,Syk	regulation of T cell differentiation	0.591247
GO:0051222	2.20251	0.168212	59	3	Tgfb1,Tgfb3,Syk	positive regulation of protein transport	0.591247
GO:0001503	1.76226	0.168247	147	6	Mef2d,Tgfb1,Id3,Lef1,Alpl,Cbfb	ossification	0.591247
GO:0021766	2.82772	0.170112	31	2	Lef1,Xrcc1	hippocampus development	0.591247
GO:0050729	2.82772	0.170112	31	2	Cd24a,Tnip1	positive regulation of inflammatory response	0.591247
GO:0055002	2.16346	0.174155	60	3	Tgfb1,Lef1,Foxp1	striated muscle cell development	0.591247
GO:0072089	2.16346	0.174155	60	3	Lef1,Foxp1,Cd24a	stem cell proliferation	0.591247
GO:0043967	2.73289	0.178752	32	2	Tcf3,Wdr5	histone H4 acetylation	0.591247
GO:0046849	2.73289	0.178752	32	2	Syk,Cbl	bone remodeling	0.591247
GO:0050714	2.73289	0.178752	32	2	Tgfb1,Syk	positive regulation of protein secretion	0.591247
GO:0048469	2.08935	0.186215	62	3	Xbp1,Dld,Cbfb	cell maturation	0.591247
GO:0045666	2.64432	0.187459	33	2	Socs2,Tcf3	positive regulation of neuron differentiation	0.591247
GO:0045834	2.64432	0.187459	33	2	Tgfb1,Scd1	positive regulation of lipid metabolic process	0.591247
GO:0048545	2.64432	0.187459	33	2	Tgfb1,Cd24a	response to steroid hormone stimulus	0.591247
GO:0051145	2.64432	0.187459	33	2	Tgfb1,Smarca4	smooth muscle cell differentiation	0.591247
GO:0046822	2.05416	0.192327	63	3	Tgfb1,Tgfb3,Pkig	regulation of nucleocytoplasmic transport	0.591247
GO:0048771	2.05416	0.192327	63	3	Syk,Cbl,Cd24a	tissue remodeling	0.591247
GO:0045333	2.56135	0.196224	34	2	Dld,Cisd1	cellular respiration	0.591247
GO:0046890	2.56135	0.196224	34	2	Sf1,Fitm2	regulation of lipid biosynthetic process	0.591247
GO:0003007	1.91425	0.197232	113	5	Baz1b,Zmiz1,Ly6e,Eng,Smarca4	heart morphogenesis	0.591247
GO:0045087	1.91425	0.197232	113	5	Syk,Zbp1,Gbp7,Irgm2,Tnip1	innate immune response	0.591247
GO:0007179	2.02014	0.198489	64	3	Tgfb1,Glg1,Eng	transforming growth factor beta receptor signaling pathway	0.591247
GO:0034504	2.02014	0.198489	64	3	Tgfb1,Tgfb3,Pkig	protein localization to nucleus	0.591247
GO:0007266	2.48348	0.205039	35	2	Rock2,Kifap3	Rho protein signal transduction	0.591247
GO:0008637	2.48348	0.205039	35	2	Sh3glb1,Cd24a	apoptotic mitochondrial changes	0.591247
GO:0043484	2.48348	0.205039	35	2	Son,Snrnp70	regulation of RNA splicing	0.591247
GO:0043506	2.48348	0.205039	35	2	Map2k7,Syk	regulation of JUN kinase activity	0.591247
GO:0016071	1.79535	0.213615	120	5	Celf2,Son,Dcp2,Cpsf6,Snrnp70	mRNA metabolic process	0.591247
GO:0006333	2.4098	0.213898	36	2	Baz1b,Smarca4	chromatin assembly or disassembly	0.591247
GO:0019722	2.4098	0.213898	36	2	Syk,Cd24a	calcium-mediated signaling	0.591247
GO:0000132	4.5369	0.216032	10	1	Numa1	establishment of mitotic spindle orientation	0.591247
GO:0000245	4.5369	0.216032	10	1	Celf2	spliceosomal complex assembly	0.591247
GO:0002438	4.5369	0.216032	10	1	Spn	acute inflammatory response to antigenic stimulus	0.591247
GO:0003300	4.5369	0.216032	10	1	Camk2d	cardiac muscle hypertrophy	0.591247
GO:0006882	4.5369	0.216032	10	1	Lck	cellular zinc ion homeostasis	0.591247
GO:0007530	4.5369	0.216032	10	1	Sf1	sex determination	0.591247
GO:0008608	4.5369	0.216032	10	1	Sgol1	attachment of spindle microtubules to kinetochore	0.591247
GO:0009124	4.5369	0.216032	10	1	Tgfb1	nucleoside monophosphate biosynthetic process	0.591247
GO:0016572	4.5369	0.216032	10	1	Baz1b	histone phosphorylation	0.591247
GO:0030325	4.5369	0.216032	10	1	Ly6e	adrenal gland development	0.591247
GO:0031063	4.5369	0.216032	10	1	Tgfb1	regulation of histone deacetylation	0.591247
GO:0042104	4.5369	0.216032	10	1	Cd24a	positive regulation of activated T cell proliferation	0.591247
GO:0042119	4.5369	0.216032	10	1	Syk	neutrophil activation	0.591247
GO:0045579	4.5369	0.216032	10	1	Syk	positive regulation of B cell differentiation	0.591247
GO:0045730	4.5369	0.216032	10	1	Cd24a	respiratory burst	0.591247
GO:0046902	4.5369	0.216032	10	1	Sh3glb1	regulation of mitochondrial membrane permeability	0.591247
GO:0050872	4.5369	0.216032	10	1	Scd1	white fat cell differentiation	0.591247
GO:0051084	4.5369	0.216032	10	1	Sh3glb1	'de novo' posttranslational protein folding	0.591247
GO:0060479	4.5369	0.216032	10	1	Numa1	lung cell differentiation	0.591247
GO:0070301	4.5369	0.216032	10	1	Prdx3	cellular response to hydrogen peroxide	0.591247
GO:2000178	4.5369	0.216032	10	1	Cd24a	negative regulation of neural precursor cell proliferation	0.591247
GO:0007178	1.76407	0.218958	122	5	Tgfb1,Glg1,Tgfb3,Eng,Lef1	transmembrane receptor protein serine/threonine kinase signaling pathway	0.591247
GO:0006633	2.34059	0.222793	37	2	Syk,Scd1	fatty acid biosynthetic process	0.591247
GO:0048747	2.34059	0.222793	37	2	Tgfb1,Lef1	muscle fiber development	0.591247
GO:0050728	2.34059	0.222793	37	2	Spn,Vimp	negative regulation of inflammatory response	0.591247
GO:0051297	2.34059	0.222793	37	2	Rock2,Sgol1	centrosome organization	0.591247
GO:0030218	1.89449	0.223584	68	3	Hcls1,Ets1,Smarca4	erythrocyte differentiation	0.591247
GO:0070201	1.71901	0.22748	125	5	Tgfb1,Tgfb3,Syk,Pkig,Sh3glb1	regulation of establishment of protein localization	0.591247
GO:0072073	1.86547	0.229957	69	3	Tgfb1,Gzf1,Cd24a	kidney epithelium development	0.591247
GO:0002088	2.27513	0.231717	38	2	Tgfb1,Pou2f1	lens development in camera-type eye	0.591247
GO:0006814	2.27513	0.231717	38	2	Tgfb1,Camk2d	sodium ion transport	0.591247
GO:0010923	2.27513	0.231717	38	2	Nifk,Gpatch2	negative regulation of phosphatase activity	0.591247
GO:0021761	2.27513	0.231717	38	2	Lef1,Xrcc1	limbic system development	0.591247
GO:0003081	4.08301	0.234901	11	1	Enpep	regulation of systemic arterial blood pressure by renin-angiotensin	0.591247
GO:0006119	4.08301	0.234901	11	1	Dld	oxidative phosphorylation	0.591247
GO:0010822	4.08301	0.234901	11	1	Sh3glb1	positive regulation of mitochondrion organization	0.591247
GO:0015909	4.08301	0.234901	11	1	Syk	long-chain fatty acid transport	0.591247
GO:0019432	4.08301	0.234901	11	1	Fitm2	triglyceride biosynthetic process	0.591247
GO:0030857	4.08301	0.234901	11	1	Ezh2	negative regulation of epithelial cell differentiation	0.591247
GO:0030903	4.08301	0.234901	11	1	Id3	notochord development	0.591247
GO:0035065	4.08301	0.234901	11	1	Tgfb1	regulation of histone acetylation	0.591247
GO:0040001	4.08301	0.234901	11	1	Numa1	establishment of mitotic spindle localization	0.591247
GO:0042481	4.08301	0.234901	11	1	Tgfb1	regulation of odontogenesis	0.591247
GO:0042554	4.08301	0.234901	11	1	Syk	superoxide anion generation	0.591247
GO:0043043	4.08301	0.234901	11	1	Mgst2	peptide biosynthetic process	0.591247
GO:0043304	4.08301	0.234901	11	1	Syk	regulation of mast cell degranulation	0.591247
GO:0045604	4.08301	0.234901	11	1	Ezh2	regulation of epidermal cell differentiation	0.591247
GO:0045747	4.08301	0.234901	11	1	Stat3	positive regulation of Notch signaling pathway	0.591247
GO:0055069	4.08301	0.234901	11	1	Lck	zinc ion homeostasis	0.591247
GO:0060026	4.08301	0.234901	11	1	Trim28	convergent extension	0.591247
GO:0060438	4.08301	0.234901	11	1	Lef1	trachea development	0.591247
GO:0060602	4.08301	0.234901	11	1	Tgfb1	branch elongation of an epithelium	0.591247
GO:0090207	4.08301	0.234901	11	1	Fitm2	regulation of triglyceride metabolic process	0.591247
GO:0071560	1.83733	0.236364	70	3	Tgfb1,Glg1,Eng	cellular response to transforming growth factor beta stimulus	0.591247
GO:0007050	2.21338	0.240664	39	2	Tgfb1,Uhrf2	cell cycle arrest	0.591247
GO:0019882	2.21338	0.240664	39	2	Psme1,Psmb8	antigen processing and presentation	0.591247
GO:0031023	2.21338	0.240664	39	2	Rock2,Sgol1	microtubule organizing center organization	0.591247
GO:0031056	2.21338	0.240664	39	2	Tgfb1,Pax5	regulation of histone modification	0.591247
GO:0032680	2.21338	0.240664	39	2	Spn,Vimp	regulation of tumor necrosis factor production	0.591247
GO:0008380	1.80983	0.242802	71	3	Celf2,Son,Snrnp70	RNA splicing	0.591247
GO:0048592	1.80983	0.242802	71	3	Stat3,Yy1,Pou2f1	eye morphogenesis	0.591247
GO:0055001	1.78334	0.249269	72	3	Tgfb1,Lef1,Foxp1	muscle cell development	0.591247
GO:0007517	1.62216	0.249515	132	5	Tgfb1,Ly6e,Lef1,Foxp1,Dtnbp1	muscle organ development	0.591247
GO:0007569	2.15471	0.249627	40	2	Zmiz1,Eng	cell aging	0.591247
GO:0060021	2.15471	0.249627	40	2	Tgfb3,Lef1	palate development	0.591247
GO:0043410	1.60919	0.252887	133	5	Tgfb1,Map2k7,Syk,Prkd2,Cd24a	positive regulation of MAPK cascade	0.591247
GO:0001709	3.7117	0.253319	12	1	Smarca4	cell fate determination	0.591247
GO:0001773	3.7117	0.253319	12	1	Tgfb1	myeloid dendritic cell activation	0.591247
GO:0001893	3.7117	0.253319	12	1	Prdx3	maternal placenta development	0.591247
GO:0001945	3.7117	0.253319	12	1	Syk	lymph vessel development	0.591247
GO:0002320	3.7117	0.253319	12	1	Lig4	lymphoid progenitor cell differentiation	0.591247
GO:0002446	3.7117	0.253319	12	1	Syk	neutrophil mediated immunity	0.591247
GO:0002467	3.7117	0.253319	12	1	Tnfrsf13c	germinal center formation	0.591247
GO:0006360	3.7117	0.253319	12	1	Taf1c	transcription from RNA polymerase I promoter	0.591247
GO:0010824	3.7117	0.253319	12	1	Rock2	regulation of centrosome duplication	0.591247
GO:0010829	3.7117	0.253319	12	1	Mzb1	negative regulation of glucose transport	0.591247
GO:0030204	3.7117	0.253319	12	1	Chst3	chondroitin sulfate metabolic process	0.591247
GO:0030225	3.7117	0.253319	12	1	Spib	macrophage differentiation	0.591247
GO:0030889	3.7117	0.253319	12	1	Cd24a	negative regulation of B cell proliferation	0.591247
GO:0035458	3.7117	0.253319	12	1	Igtp	cellular response to interferon-beta	0.591247
GO:0042743	3.7117	0.253319	12	1	Prdx3	hydrogen peroxide metabolic process	0.591247
GO:0043984	3.7117	0.253319	12	1	Wdr5	histone H4-K16 acetylation	0.591247
GO:0045063	3.7117	0.253319	12	1	Lef1	T-helper 1 cell differentiation	0.591247
GO:0045648	3.7117	0.253319	12	1	Ets1	positive regulation of erythrocyte differentiation	0.591247
GO:0045661	3.7117	0.253319	12	1	Tgfb1	regulation of myoblast differentiation	0.591247
GO:0048384	3.7117	0.253319	12	1	Ezh2	retinoic acid receptor signaling pathway	0.591247
GO:0051294	3.7117	0.253319	12	1	Numa1	establishment of spindle orientation	0.591247
GO:0060841	3.7117	0.253319	12	1	Eng	venous blood vessel development	0.591247
GO:0070527	3.7117	0.253319	12	1	Syk	platelet aggregation	0.591247
GO:0072132	3.7117	0.253319	12	1	Eng	mesenchyme morphogenesis	0.591247
GO:0090162	3.7117	0.253319	12	1	Cyth1	establishment of epithelial cell polarity	0.591247
GO:0006479	1.75756	0.255763	73	3	Pax5,Wdr5,Ezh2	protein methylation	0.591247
GO:0002244	2.09906	0.258601	41	2	Tgfb1,Lig4	hematopoietic progenitor cell differentiation	0.591247
GO:0006164	2.09906	0.258601	41	2	Tgfb1,Impdh1	purine nucleotide biosynthetic process	0.591247
GO:0009266	2.09906	0.258601	41	2	Psip1,Plac8	response to temperature stimulus	0.591247
GO:0030856	2.09906	0.258601	41	2	Ezh2,Cd24a	regulation of epithelial cell differentiation	0.591247
GO:0051168	2.09906	0.258601	41	2	Tgfb1,Strada	nuclear export	0.591247
GO:0072091	2.09906	0.258601	41	2	Foxp1,Cd24a	regulation of stem cell proliferation	0.591247
GO:2000021	2.09906	0.258601	41	2	Lck,Hsh2d	regulation of ion homeostasis	0.591247
GO:0009725	1.58385	0.259785	135	5	Tgfb1,Stat3,Hcls1,Mzb1,Cd24a	response to hormone stimulus	0.591247
GO:0008202	1.73249	0.262281	74	3	Sf1,Ldlr,Scd1	steroid metabolic process	0.591247
GO:0030902	1.73249	0.262281	74	3	Lef1,Ezh2,Smarca4	hindbrain development	0.591247
GO:0001916	3.40159	0.271297	13	1	Tap1	positive regulation of T cell mediated cytotoxicity	0.591247
GO:0002820	3.40159	0.271297	13	1	Spn	negative regulation of adaptive immune response	0.591247
GO:0006024	3.40159	0.271297	13	1	Chst3	glycosaminoglycan biosynthetic process	0.591247
GO:0006584	3.40159	0.271297	13	1	Ly6e	catecholamine metabolic process	0.591247
GO:0007212	3.40159	0.271297	13	1	Dtnbp1	dopamine receptor signaling pathway	0.591247
GO:0009409	3.40159	0.271297	13	1	Plac8	response to cold	0.591247
GO:0009712	3.40159	0.271297	13	1	Ly6e	catechol-containing compound metabolic process	0.591247
GO:0010165	3.40159	0.271297	13	1	Ikbip	response to X-ray	0.591247
GO:0010543	3.40159	0.271297	13	1	Syk	regulation of platelet activation	0.591247
GO:0010761	3.40159	0.271297	13	1	Tgfb1	fibroblast migration	0.591247
GO:0030947	3.40159	0.271297	13	1	Prkd2	regulation of vascular endothelial growth factor receptor signaling pathway	0.591247
GO:0043303	3.40159	0.271297	13	1	Syk	mast cell degranulation	0.591247
GO:0043552	3.40159	0.271297	13	1	Tgfb1	positive regulation of phosphatidylinositol 3-kinase activity	0.591247
GO:0045124	3.40159	0.271297	13	1	Syk	regulation of bone resorption	0.591247
GO:0045214	3.40159	0.271297	13	1	Foxp1	sarcomere organization	0.591247
GO:0046605	3.40159	0.271297	13	1	Rock2	regulation of centrosome cycle	0.591247
GO:0051489	3.40159	0.271297	13	1	Tgfb3	regulation of filopodium assembly	0.591247
GO:0060561	3.40159	0.271297	13	1	Lef1	apoptotic process involved in morphogenesis	0.591247
GO:0070306	3.40159	0.271297	13	1	Tgfb1	lens fiber cell differentiation	0.591247
GO:0071346	3.40159	0.271297	13	1	Gbp7	cellular response to interferon-gamma	0.591247
GO:0072080	3.40159	0.271297	13	1	Cd24a	nephron tubule development	0.591247
GO:0097028	3.40159	0.271297	13	1	Tgfb1	dendritic cell differentiation	0.591247
GO:0032388	1.99599	0.276559	43	2	Tgfb3,Syk	positive regulation of intracellular transport	0.591247
GO:0050727	1.89392	0.282058	91	4	Cd24a,Spn,Vimp,Tnip1	regulation of inflammatory response	0.591247
GO:0071902	1.87207	0.284209	92	4	Tgfb1,Map2k7,Syk,Cd24a	positive regulation of protein serine/threonine kinase activity	0.591247
GO:0007204	1.94813	0.285532	44	2	Lck,Cd24a	elevation of cytosolic calcium ion concentration	0.591247
GO:0010950	1.94813	0.285532	44	2	Lck,Psme1	positive regulation of endopeptidase activity	0.591247
GO:0048489	1.94813	0.285532	44	2	Cd24a,Dtnbp1	synaptic vesicle transport	0.591247
GO:0002763	3.13946	0.288845	14	1	Ikzf1	positive regulation of myeloid leukocyte differentiation	0.591247
GO:0002920	3.13946	0.288845	14	1	Cd37	regulation of humoral immune response	0.591247
GO:0003197	3.13946	0.288845	14	1	Eng	endocardial cushion development	0.591247
GO:0006368	3.13946	0.288845	14	1	Ezh2	transcription elongation from RNA polymerase II promoter	0.591247
GO:0006636	3.13946	0.288845	14	1	Syk	unsaturated fatty acid biosynthetic process	0.591247
GO:0030166	3.13946	0.288845	14	1	Chst3	proteoglycan biosynthetic process	0.591247
GO:0035456	3.13946	0.288845	14	1	Igtp	response to interferon-beta	0.591247
GO:0035886	3.13946	0.288845	14	1	Smarca4	vascular smooth muscle cell differentiation	0.591247
GO:0043388	3.13946	0.288845	14	1	Smarca4	positive regulation of DNA binding	0.591247
GO:0043666	3.13946	0.288845	14	1	Ppp6r1	regulation of phosphoprotein phosphatase activity	0.591247
GO:0046456	3.13946	0.288845	14	1	Syk	icosanoid biosynthetic process	0.591247
GO:0048103	3.13946	0.288845	14	1	Lef1	somatic stem cell division	0.591247
GO:0050810	3.13946	0.288845	14	1	Sf1	regulation of steroid biosynthetic process	0.591247
GO:0051567	3.13946	0.288845	14	1	Pax5	histone H3-K9 methylation	0.591247
GO:0060043	3.13946	0.288845	14	1	Foxp1	regulation of cardiac muscle cell proliferation	0.591247
GO:0060713	3.13946	0.288845	14	1	Lef1	labyrinthine layer morphogenesis	0.591247
GO:0061384	3.13946	0.288845	14	1	Smarca4	heart trabecula morphogenesis	0.591247
GO:0006954	1.56768	0.291172	164	6	Tgfb1,Syk,Cd24a,Spn,Vimp,Tnip1	inflammatory response	0.591247
GO:0045926	1.80925	0.291296	95	4	Tgfb1,Socs2,Plac8,Scd1	negative regulation of growth	0.591247
GO:0033365	1.55753	0.293153	165	6	Tgfb1,Stat3,Tgfb3,Pkig,Sh3glb1,Arntl	protein localization to organelle	0.591247
GO:0008361	1.90251	0.294495	45	2	Vpreb2,Vpreb1	regulation of cell size	0.591247
GO:0001667	1.76977	0.296519	97	4	Tgfb1,Lef1,Dpp4,Prkd2	ameboidal cell migration	0.591247
GO:0035264	1.73188	0.302116	99	4	Stat3,Ikzf1,Socs2,Plac8	multicellular organism growth	0.591247
GO:0046777	1.73188	0.302116	99	4	Lck,Trim28,Syk,Camk2d	protein autophosphorylation	0.591247
GO:0007219	1.85898	0.303443	46	2	Stat3,Gmds	Notch signaling pathway	0.591247
GO:0007243	1.85898	0.303443	46	2	Mknk2,Dapk1	intracellular protein kinase cascade	0.591247
GO:0050679	1.85898	0.303443	46	2	Foxp1,Prkd2	positive regulation of epithelial cell proliferation	0.591247
GO:0001938	2.9148	0.305973	15	1	Prkd2	positive regulation of endothelial cell proliferation	0.591247
GO:0008045	2.9148	0.305973	15	1	Foxp1	motor neuron axon guidance	0.591247
GO:0009620	2.9148	0.305973	15	1	Syk	response to fungus	0.591247
GO:0032963	2.9148	0.305973	15	1	Tgfb1	collagen metabolic process	0.591247
GO:0033003	2.9148	0.305973	15	1	Syk	regulation of mast cell activation	0.591247
GO:0043534	2.9148	0.305973	15	1	Tgfb1	blood vessel endothelial cell migration	0.591247
GO:0043981	2.9148	0.305973	15	1	Wdr5	histone H4-K5 acetylation	0.591247
GO:0043982	2.9148	0.305973	15	1	Wdr5	histone H4-K8 acetylation	0.591247
GO:0044070	2.9148	0.305973	15	1	Syk	regulation of anion transport	0.591247
GO:0044130	2.9148	0.305973	15	1	Scd1	negative regulation of growth of symbiont in host	0.591247
GO:0044146	2.9148	0.305973	15	1	Scd1	negative regulation of growth of symbiont involved in interaction with host	0.591247
GO:0045061	2.9148	0.305973	15	1	Spn	thymic T cell selection	0.591247
GO:0048339	2.9148	0.305973	15	1	Lef1	paraxial mesoderm development	0.591247
GO:0048488	2.9148	0.305973	15	1	Cd24a	synaptic vesicle endocytosis	0.591247
GO:0090311	2.9148	0.305973	15	1	Tgfb1	regulation of protein deacetylation	0.591247
GO:0032259	1.69555	0.308064	101	4	Pax5,Wdr5,Ezh2,Smarca4	methylation	0.591247
GO:0000187	1.8172	0.312372	47	2	Map2k7,Syk	activation of MAPK activity	0.591247
GO:0016064	1.8172	0.312372	47	2	Tgfb1,Lig4	immunoglobulin mediated immune response	0.591247
GO:0051480	1.8172	0.312372	47	2	Lck,Cd24a	cytosolic calcium ion homeostasis	0.591247
GO:0070372	1.8172	0.312372	47	2	Syk,Prkd2	regulation of ERK1 and ERK2 cascade	0.591247
GO:0030324	1.64378	0.317599	104	4	Tgfb3,Cux1,Foxp1,Numa1	lung development	0.591247
GO:0048754	1.64378	0.317599	104	4	Tgfb1,Eng,Gzf1,Lef1	branching morphogenesis of a tube	0.591247
GO:0002237	1.6272	0.32093	105	4	Plscr3,Tcf3,Prdx3,Cd24a	response to molecule of bacterial origin	0.591247
GO:0000398	1.77746	0.321276	48	2	Celf2,Snrnp70	mRNA splicing, via spliceosome	0.591247
GO:0009636	1.77746	0.321276	48	2	Cnp,Alpl	response to toxin	0.591247
GO:0017157	1.77746	0.321276	48	2	Exoc2,Syk	regulation of exocytosis	0.591247
GO:0002532	2.71998	0.322693	16	1	Syk	production of molecular mediator involved in inflammatory response	0.591247
GO:0006378	2.71998	0.322693	16	1	Cpsf6	mRNA polyadenylation	0.591247
GO:0010883	2.71998	0.322693	16	1	Fitm2	regulation of lipid storage	0.591247
GO:0022904	2.71998	0.322693	16	1	Dld	respiratory electron transport chain	0.591247
GO:0030262	2.71998	0.322693	16	1	Cd24a	apoptotic nuclear changes	0.591247
GO:0030279	2.71998	0.322693	16	1	Tgfb1	negative regulation of ossification	0.591247
GO:0030520	2.71998	0.322693	16	1	Lef1	intracellular estrogen receptor signaling pathway	0.591247
GO:0032784	2.71998	0.322693	16	1	Ezh2	regulation of DNA-dependent transcription, elongation	0.591247
GO:0034453	2.71998	0.322693	16	1	Sgol1	microtubule anchoring	0.591247
GO:0042307	2.71998	0.322693	16	1	Tgfb3	positive regulation of protein import into nucleus	0.591247
GO:0043550	2.71998	0.322693	16	1	Tgfb1	regulation of lipid kinase activity	0.591247
GO:0044259	2.71998	0.322693	16	1	Tgfb1	multicellular organismal macromolecule metabolic process	0.591247
GO:0046850	2.71998	0.322693	16	1	Syk	regulation of bone remodeling	0.591247
GO:0048490	2.71998	0.322693	16	1	Dtnbp1	anterograde synaptic vesicle transport	0.591247
GO:0051881	2.71998	0.322693	16	1	Hsh2d	regulation of mitochondrial membrane potential	0.591247
GO:0060749	2.71998	0.322693	16	1	Socs2	mammary gland alveolus development	0.591247
GO:0061377	2.71998	0.322693	16	1	Socs2	mammary gland lobule development	0.591247
GO:2000108	2.71998	0.322693	16	1	Cd24a	positive regulation of leukocyte apoptotic process	0.591247
GO:0018108	1.59502	0.327807	107	4	Lck,Syk,Hcls1,Cd24a	peptidyl-tyrosine phosphorylation	0.592378
GO:0030323	1.59502	0.327807	107	4	Tgfb3,Cux1,Foxp1,Numa1	respiratory tube development	0.592378
GO:0014902	1.73933	0.330154	49	2	Tgfb1,Rbm38	myotube differentiation	0.592378
GO:0019724	1.73933	0.330154	49	2	Tgfb1,Lig4	B cell mediated immunity	0.592378
GO:0000375	1.70279	0.338999	50	2	Celf2,Snrnp70	RNA splicing, via transesterification reactions	0.592378
GO:0010952	1.70279	0.338999	50	2	Lck,Psme1	positive regulation of peptidase activity	0.592378
GO:0030010	1.70279	0.338999	50	2	Cyth1,Numa1	establishment of cell polarity	0.592378
GO:0048593	1.70279	0.338999	50	2	Yy1,Pou2f1	camera-type eye morphogenesis	0.592378
GO:0050708	1.70279	0.338999	50	2	Tgfb1,Syk	regulation of protein secretion	0.592378
GO:0001659	2.5497	0.339012	17	1	Stat3	temperature homeostasis	0.592378
GO:0006334	2.5497	0.339012	17	1	Smarca4	nucleosome assembly	0.592378
GO:0030512	2.5497	0.339012	17	1	Glg1	negative regulation of transforming growth factor beta receptor signaling pathway	0.592378
GO:0030858	2.5497	0.339012	17	1	Cd24a	positive regulation of epithelial cell differentiation	0.592378
GO:0032720	2.5497	0.339012	17	1	Vimp	negative regulation of tumor necrosis factor production	0.592378
GO:0032814	2.5497	0.339012	17	1	Ptpn22	regulation of natural killer cell activation	0.592378
GO:0033138	2.5497	0.339012	17	1	Tgfb1	positive regulation of peptidyl-serine phosphorylation	0.592378
GO:0044117	2.5497	0.339012	17	1	Scd1	growth of symbiont in host	0.592378
GO:0046677	2.5497	0.339012	17	1	Alpl	response to antibiotic	0.592378
GO:0048742	2.5497	0.339012	17	1	Tgfb1	regulation of skeletal muscle fiber development	0.592378
GO:0050688	2.5497	0.339012	17	1	Spn	regulation of defense response to virus	0.592378
GO:0055024	2.5497	0.339012	17	1	Foxp1	regulation of cardiac muscle tissue development	0.592378
GO:0060420	2.5497	0.339012	17	1	Foxp1	regulation of heart growth	0.592378
GO:0051223	1.51977	0.346136	112	4	Tgfb1,Tgfb3,Syk,Pkig	regulation of protein transport	0.596497
GO:0001832	2.39929	0.354941	18	1	Smarca4	blastocyst growth	0.596497
GO:0002040	2.39929	0.354941	18	1	Lef1	sprouting angiogenesis	0.596497
GO:0002089	2.39929	0.354941	18	1	Pou2f1	lens morphogenesis in camera-type eye	0.596497
GO:0007052	2.39929	0.354941	18	1	Smc3	mitotic spindle organization	0.596497
GO:0016925	2.39929	0.354941	18	1	Bcl11a	protein sumoylation	0.596497
GO:0030239	2.39929	0.354941	18	1	Foxp1	myofibril assembly	0.596497
GO:0031128	2.39929	0.354941	18	1	Pou2f1	developmental induction	0.596497
GO:0040018	2.39929	0.354941	18	1	Ikzf1	positive regulation of multicellular organism growth	0.596497
GO:0043154	2.39929	0.354941	18	1	Lef1	negative regulation of cysteine-type endopeptidase activity involved in apoptotic process	0.596497
GO:0043631	2.39929	0.354941	18	1	Cpsf6	RNA polyadenylation	0.596497
GO:0051653	2.39929	0.354941	18	1	Numa1	spindle localization	0.596497
GO:0061005	2.39929	0.354941	18	1	Cd24a	cell differentiation involved in kidney development	0.596497
GO:2000117	2.39929	0.354941	18	1	Lef1	negative regulation of cysteine-type endopeptidase activity	0.596497
GO:0007596	1.63409	0.356582	52	2	Syk,Dtnbp1	blood coagulation	0.596497
GO:0007599	1.60176	0.365313	53	2	Syk,Dtnbp1	hemostasis	0.596497
GO:0043405	1.4382	0.369945	118	4	Tgfb1,Map2k7,Syk,Cd24a	regulation of MAP kinase activity	0.596497
GO:0001913	2.26557	0.370488	19	1	Tap1	T cell mediated cytotoxicity	0.596497
GO:0015908	2.26557	0.370488	19	1	Syk	fatty acid transport	0.596497
GO:0017145	2.26557	0.370488	19	1	Lef1	stem cell division	0.596497
GO:0030193	2.26557	0.370488	19	1	Syk	regulation of blood coagulation	0.596497
GO:0031060	2.26557	0.370488	19	1	Pax5	regulation of histone methylation	0.596497
GO:0032330	2.26557	0.370488	19	1	Glg1	regulation of chondrocyte differentiation	0.596497
GO:0032633	2.26557	0.370488	19	1	Lef1	interleukin-4 production	0.596497
GO:0046847	2.26557	0.370488	19	1	Tgfb3	filopodium assembly	0.596497
GO:0048708	2.26557	0.370488	19	1	Stat3	astrocyte differentiation	0.596497
GO:0051298	2.26557	0.370488	19	1	Rock2	centrosome duplication	0.596497
GO:0051865	2.26557	0.370488	19	1	Uhrf2	protein autoubiquitination	0.596497
GO:2000377	2.26557	0.370488	19	1	Syk	regulation of reactive oxygen species metabolic process	0.596497
GO:0006869	1.57067	0.373998	54	2	Syk,Ldlr	lipid transport	0.596497
GO:0042593	1.57067	0.373998	54	2	Stat3,Plscr3	glucose homeostasis	0.596497
GO:0070371	1.57067	0.373998	54	2	Syk,Prkd2	ERK1 and ERK2 cascade	0.596497
GO:0001657	1.54075	0.382637	55	2	Tgfb1,Gzf1	ureteric bud development	0.596497
GO:0019932	1.54075	0.382637	55	2	Syk,Cd24a	second-messenger-mediated signaling	0.596497
GO:0072164	1.54075	0.382637	55	2	Tgfb1,Gzf1	mesonephric tubule development	0.596497
GO:0072593	1.54075	0.382637	55	2	Syk,Prdx3	reactive oxygen species metabolic process	0.596497
GO:0045860	1.55927	0.385431	137	5	Tgfb1,Map2k7,Syk,Cd24a,Strada	positive regulation of protein kinase activity	0.596497
GO:0001754	2.14609	0.385664	20	1	Stat3	eye photoreceptor cell differentiation	0.596497
GO:0001755	2.14609	0.385664	20	1	Lef1	neural crest cell migration	0.596497
GO:0006289	2.14609	0.385664	20	1	Lig4	nucleotide-excision repair	0.596497
GO:0006342	2.14609	0.385664	20	1	Smarca4	chromatin silencing	0.596497
GO:0007595	2.14609	0.385664	20	1	Socs2	lactation	0.596497
GO:0008089	2.14609	0.385664	20	1	Dtnbp1	anterograde axon cargo transport	0.596497
GO:0010623	2.14609	0.385664	20	1	Lef1	developmental programmed cell death	0.596497
GO:0010955	2.14609	0.385664	20	1	Glg1	negative regulation of protein processing	0.596497
GO:0031032	2.14609	0.385664	20	1	Foxp1	actomyosin structure organization	0.596497
GO:0031058	2.14609	0.385664	20	1	Tgfb1	positive regulation of histone modification	0.596497
GO:0035116	2.14609	0.385664	20	1	Smarca4	embryonic hindlimb morphogenesis	0.596497
GO:0040036	2.14609	0.385664	20	1	Prkd2	regulation of fibroblast growth factor receptor signaling pathway	0.596497
GO:0042491	2.14609	0.385664	20	1	Cux1	auditory receptor cell differentiation	0.596497
GO:0045576	2.14609	0.385664	20	1	Syk	mast cell activation	0.596497
GO:0048730	2.14609	0.385664	20	1	Smarca4	epidermis morphogenesis	0.596497
GO:0050798	2.14609	0.385664	20	1	Cd24a	activated T cell proliferation	0.596497
GO:0051568	2.14609	0.385664	20	1	Wdr5	histone H3-K4 methylation	0.596497
GO:0060048	2.14609	0.385664	20	1	Camk2d	cardiac muscle contraction	0.596497
GO:0060135	2.14609	0.385664	20	1	Prdx3	maternal process involved in female pregnancy	0.596497
GO:0061097	2.14609	0.385664	20	1	Cd24a	regulation of protein tyrosine kinase activity	0.596497
GO:0071897	2.14609	0.385664	20	1	Prkd2	DNA biosynthetic process	0.596497
GO:0001822	1.54726	0.386994	138	5	Tgfb1,Id3,Gzf1,Enpep,Cd24a	kidney development	0.596497
GO:0001823	1.51195	0.391224	56	2	Tgfb1,Gzf1	mesonephros development	0.596497
GO:0042493	1.51195	0.391224	56	2	Lck,Tcf3	response to drug	0.596497
GO:0045765	1.51195	0.391224	56	2	Eng,Prkd2	regulation of angiogenesis	0.596497
GO:0071363	1.51228	0.392122	141	5	Tgfb1,Glg1,Tgfb3,Eng,Prkd2	cellular response to growth factor stimulus	0.596497
GO:0072001	1.50097	0.393972	142	5	Tgfb1,Id3,Gzf1,Enpep,Cd24a	renal system development	0.596497
GO:0070848	1.47882	0.397873	144	5	Tgfb1,Glg1,Tgfb3,Eng,Prkd2	response to growth factor stimulus	0.596497
GO:0031346	1.48419	0.399759	57	2	Tgfb3,Cd24a	positive regulation of cell projection organization	0.596497
GO:0033044	1.48419	0.399759	57	2	Tgfb1,Pax5	regulation of chromosome organization	0.596497
GO:0050769	1.48419	0.399759	57	2	Xrcc6,Lig4	positive regulation of neurogenesis	0.596497
GO:0002053	2.03839	0.400477	21	1	Foxp1	positive regulation of mesenchymal cell proliferation	0.596497
GO:0002292	2.03839	0.400477	21	1	Lef1	T cell differentiation involved in immune response	0.596497
GO:0008593	2.03839	0.400477	21	1	Stat3	regulation of Notch signaling pathway	0.596497
GO:0021879	2.03839	0.400477	21	1	Lef1	forebrain neuron differentiation	0.596497
GO:0033619	2.03839	0.400477	21	1	Napsa	membrane protein proteolysis	0.596497
GO:0042093	2.03839	0.400477	21	1	Lef1	T-helper cell differentiation	0.596497
GO:0042116	2.03839	0.400477	21	1	Syk	macrophage activation	0.596497
GO:0042308	2.03839	0.400477	21	1	Pkig	negative regulation of protein import into nucleus	0.596497
GO:0042542	2.03839	0.400477	21	1	Prdx3	response to hydrogen peroxide	0.596497
GO:0043467	2.03839	0.400477	21	1	Cisd1	regulation of generation of precursor metabolites and energy	0.596497
GO:0045668	2.03839	0.400477	21	1	Id3	negative regulation of osteoblast differentiation	0.596497
GO:0046324	2.03839	0.400477	21	1	Mzb1	regulation of glucose import	0.596497
GO:0050869	2.03839	0.400477	21	1	Cd24a	negative regulation of B cell activation	0.596497
GO:2000107	2.03839	0.400477	21	1	Hsh2d	negative regulation of leukocyte apoptotic process	0.596497
GO:0008610	1.45731	0.402033	146	5	Syk,Sf1,Sh3glb1,Scd1,Fitm2	lipid biosynthetic process	0.596497
GO:0006605	1.44678	0.404206	147	5	Tgfb1,Stat3,Tgfb3,Pkig,Arntl	protein targeting	0.596497
GO:0034097	1.44678	0.404206	147	5	Zbp1,Gbp7,Cd24a,Irgm2,Igtp	response to cytokine stimulus	0.596497
GO:0033674	1.42616	0.408731	149	5	Tgfb1,Map2k7,Syk,Cd24a,Strada	positive regulation of kinase activity	0.596497
GO:0009314	1.41606	0.41108	150	5	Ikbip,Yy1,Xrcc6,Smc1a,Lig4	response to radiation	0.596497
GO:0048589	1.41606	0.41108	150	5	Tgfb1,Trim28,Zmiz1,Foxp1,Smarca4	developmental growth	0.596497
GO:0002287	1.94106	0.414935	22	1	Lef1	alpha-beta T cell activation involved in immune response	0.596497
GO:0007098	1.94106	0.414935	22	1	Rock2	centrosome cycle	0.596497
GO:0007173	1.94106	0.414935	22	1	Tgfb1	epidermal growth factor receptor signaling pathway	0.596497
GO:0009408	1.94106	0.414935	22	1	Psip1	response to heat	0.596497
GO:0010332	1.94106	0.414935	22	1	Lig4	response to gamma radiation	0.596497
GO:0021517	1.94106	0.414935	22	1	Foxp1	ventral spinal cord development	0.596497
GO:0042088	1.94106	0.414935	22	1	Lef1	T-helper 1 type immune response	0.596497
GO:0044236	1.94106	0.414935	22	1	Tgfb1	multicellular organismal metabolic process	0.596497
GO:0045599	1.94106	0.414935	22	1	Tgfb1	negative regulation of fat cell differentiation	0.596497
GO:0045646	1.94106	0.414935	22	1	Ets1	regulation of erythrocyte differentiation	0.596497
GO:0045682	1.94106	0.414935	22	1	Ezh2	regulation of epidermis development	0.596497
GO:0046323	1.94106	0.414935	22	1	Mzb1	glucose import	0.596497
GO:0048010	1.94106	0.414935	22	1	Prkd2	vascular endothelial growth factor receptor signaling pathway	0.596497
GO:0070979	1.94106	0.414935	22	1	Anapc13	protein K11-linked ubiquitination	0.596497
GO:0010001	1.70812	0.428244	75	3	Stat3,Lef1,Smarca4	glial cell differentiation	0.596497
GO:0033993	1.3491	0.429001	157	5	Tgfb1,Plscr3,Tcf3,Prdx3,Cd24a	response to lipid	0.596497
GO:0001936	1.85258	0.429046	23	1	Prkd2	regulation of endothelial cell proliferation	0.596497
GO:0006403	1.85258	0.429046	23	1	Yy1	RNA localization	0.596497
GO:0006801	1.85258	0.429046	23	1	Syk	superoxide metabolic process	0.596497
GO:0007006	1.85258	0.429046	23	1	Sh3glb1	mitochondrial membrane organization	0.596497
GO:0007229	1.85258	0.429046	23	1	Syk	integrin-mediated signaling pathway	0.596497
GO:0007631	1.85258	0.429046	23	1	Stat3	feeding behavior	0.596497
GO:0010976	1.85258	0.429046	23	1	Cd24a	positive regulation of neuron projection development	0.596497
GO:0035315	1.85258	0.429046	23	1	Cux1	hair cell differentiation	0.596497
GO:0045055	1.85258	0.429046	23	1	Syk	regulated secretory pathway	0.596497
GO:0045814	1.85258	0.429046	23	1	Smarca4	negative regulation of gene expression, epigenetic	0.596497
GO:0048538	1.85258	0.429046	23	1	Ikzf1	thymus development	0.596497
GO:0048641	1.85258	0.429046	23	1	Tgfb1	regulation of skeletal muscle tissue development	0.596497
GO:0050921	1.85258	0.429046	23	1	Tgfb1	positive regulation of chemotaxis	0.596497
GO:0051897	1.85258	0.429046	23	1	Tgfb1	positive regulation of protein kinase B signaling cascade	0.596497
GO:0060038	1.85258	0.429046	23	1	Foxp1	cardiac muscle cell proliferation	0.596497
GO:0060444	1.85258	0.429046	23	1	Tgfb1	branching involved in mammary gland duct morphogenesis	0.596497
GO:0061383	1.85258	0.429046	23	1	Smarca4	trabecula morphogenesis	0.596497
GO:0070534	1.85258	0.429046	23	1	Wwp2	protein K63-linked ubiquitination	0.596497
GO:0032147	1.68441	0.430921	76	3	Map2k7,Syk,Strada	activation of protein kinase activity	0.598101
GO:0006470	1.66135	0.433708	77	3	Tgfb1,Ptpn22,Igbp1	protein dephosphorylation	0.599963
GO:0051047	1.66135	0.433708	77	3	Tgfb1,Exoc2,Syk	positive regulation of secretion	0.599963
GO:0051216	1.61704	0.439596	79	3	Mef2d,Tgfb1,Glg1	cartilage development	0.602526
GO:0006749	1.77166	0.44282	24	1	Mgst2	glutathione metabolic process	0.602526
GO:0010464	1.77166	0.44282	24	1	Foxp1	regulation of mesenchymal cell proliferation	0.602526
GO:0032623	1.77166	0.44282	24	1	Prkd2	interleukin-2 production	0.602526
GO:0034614	1.77166	0.44282	24	1	Prdx3	cellular response to reactive oxygen species	0.602526
GO:0035137	1.77166	0.44282	24	1	Smarca4	hindlimb morphogenesis	0.602526
GO:0042770	1.77166	0.44282	24	1	Smc1a	signal transduction in response to DNA damage	0.602526
GO:0048286	1.77166	0.44282	24	1	Tgfb3	lung alveolus development	0.602526
GO:0055010	1.77166	0.44282	24	1	Ly6e	ventricular cardiac muscle tissue morphogenesis	0.602526
GO:0061041	1.77166	0.44282	24	1	Syk	regulation of wound healing	0.602526
GO:0006874	1.55477	0.449148	82	3	Lck,Tgfb1,Cd24a	cellular calcium ion homeostasis	0.610136
GO:0015918	1.69755	0.456264	25	1	Ldlr	sterol transport	0.611792
GO:0019884	1.69755	0.456264	25	1	Psme1	antigen processing and presentation of exogenous antigen	0.611792
GO:0030301	1.69755	0.456264	25	1	Ldlr	cholesterol transport	0.611792
GO:0033135	1.69755	0.456264	25	1	Tgfb1	regulation of peptidyl-serine phosphorylation	0.611792
GO:0043589	1.69755	0.456264	25	1	Smarca4	skin morphogenesis	0.611792
GO:0045445	1.69755	0.456264	25	1	Tgfb1	myoblast differentiation	0.611792
GO:0050715	1.69755	0.456264	25	1	Syk	positive regulation of cytokine secretion	0.611792
GO:0060491	1.69755	0.456264	25	1	Tgfb3	regulation of cell projection assembly	0.611792
GO:0040029	1.47877	0.463055	86	3	Baz1b,H2afy,Smarca4	regulation of gene expression, epigenetic	0.618898
GO:0055074	1.47877	0.463055	86	3	Lck,Tgfb1,Cd24a	calcium ion homeostasis	0.618898
GO:0003229	1.62936	0.469386	26	1	Ly6e	ventricular cardiac muscle tissue development	0.620367
GO:0006306	1.62936	0.469386	26	1	Smarca4	DNA methylation	0.620367
GO:0006694	1.62936	0.469386	26	1	Sf1	steroid biosynthetic process	0.620367
GO:0007215	1.62936	0.469386	26	1	Dapk1	glutamate receptor signaling pathway	0.620367
GO:0010463	1.62936	0.469386	26	1	Foxp1	mesenchymal cell proliferation	0.620367
GO:0014013	1.62936	0.469386	26	1	Ezh2	regulation of gliogenesis	0.620367
GO:0048520	1.62936	0.469386	26	1	Tgfb1	positive regulation of behavior	0.620367
GO:0050678	1.4264	0.474229	89	3	Tgfb1,Foxp1,Prkd2	regulation of epithelial cell proliferation	0.625771
GO:0032496	1.39348	0.481979	91	3	Plscr3,Tcf3,Prdx3	response to lipopolysaccharide	0.625909
GO:0000018	1.56641	0.482194	27	1	Tgfb1	regulation of DNA recombination	0.625909
GO:0001935	1.56641	0.482194	27	1	Prkd2	endothelial cell proliferation	0.625909
GO:0002526	1.56641	0.482194	27	1	Spn	acute inflammatory response	0.625909
GO:0016575	1.56641	0.482194	27	1	Tgfb1	histone deacetylation	0.625909
GO:0021872	1.56641	0.482194	27	1	Lef1	forebrain generation of neurons	0.625909
GO:0048741	1.56641	0.482194	27	1	Tgfb1	skeletal muscle fiber development	0.625909
GO:0051209	1.56641	0.482194	27	1	Lck	release of sequestered calcium ion into cytosol	0.625909
GO:0052547	1.36202	0.489938	93	3	Lck,Psme1,Lef1	regulation of peptidase activity	0.625909
GO:0001658	1.50813	0.494695	28	1	Gzf1	branching involved in ureteric bud morphogenesis	0.625909
GO:0002286	1.50813	0.494695	28	1	Lef1	T cell activation involved in immune response	0.625909
GO:0006029	1.50813	0.494695	28	1	Chst3	proteoglycan metabolic process	0.625909
GO:0006200	1.50813	0.494695	28	1	Smarca4	ATP catabolic process	0.625909
GO:0006941	1.50813	0.494695	28	1	Camk2d	striated muscle contraction	0.625909
GO:0007606	1.50813	0.494695	28	1	Lef1	sensory perception of chemical stimulus	0.625909
GO:0008652	1.50813	0.494695	28	1	Mgst2	cellular amino acid biosynthetic process	0.625909
GO:0010827	1.50813	0.494695	28	1	Mzb1	regulation of glucose transport	0.625909
GO:0014904	1.50813	0.494695	28	1	Tgfb1	myotube cell development	0.625909
GO:0019915	1.50813	0.494695	28	1	Fitm2	lipid storage	0.625909
GO:0030203	1.50813	0.494695	28	1	Chst3	glycosaminoglycan metabolic process	0.625909
GO:0030518	1.50813	0.494695	28	1	Lef1	intracellular steroid hormone receptor signaling pathway	0.625909
GO:0031497	1.50813	0.494695	28	1	Smarca4	chromatin assembly	0.625909
GO:0031532	1.50813	0.494695	28	1	Dtnbp1	actin cytoskeleton reorganization	0.625909
GO:0060425	1.50813	0.494695	28	1	Foxp1	lung morphogenesis	0.625909
GO:0070374	1.50813	0.494695	28	1	Prkd2	positive regulation of ERK1 and ERK2 cascade	0.625909
GO:0090316	1.50813	0.494695	28	1	Tgfb3	positive regulation of intracellular protein transport	0.625909
GO:0090317	1.50813	0.494695	28	1	Pkig	negative regulation of intracellular protein transport	0.625909
GO:0006631	1.33194	0.498082	95	3	Syk,Scd1,Mgst2	fatty acid metabolic process	0.626076
GO:0010638	1.33194	0.498082	95	3	Tgfb1,Rock2,Sh3glb1	positive regulation of organelle organization	0.626076
GO:0007265	1.31737	0.502215	96	3	Rock2,Kifap3,Sgsm3	Ras protein signal transduction	0.626076
GO:0030198	1.31737	0.502215	96	3	Tgfb1,Smarca4,Dpp4	extracellular matrix organization	0.626076
GO:0051346	1.31737	0.502215	96	3	Nifk,Lef1,Gpatch2	negative regulation of hydrolase activity	0.626076
GO:0050878	1.30312	0.506386	97	3	Socs2,Syk,Dtnbp1	regulation of body fluid levels	0.626076
GO:0001947	1.45401	0.506896	29	1	Eng	heart looping	0.626076
GO:0007431	1.45401	0.506896	29	1	Xbp1	salivary gland development	0.626076
GO:0010469	1.45401	0.506896	29	1	Dapk1	regulation of receptor activity	0.626076
GO:0014032	1.45401	0.506896	29	1	Lef1	neural crest cell development	0.626076
GO:0018107	1.45401	0.506896	29	1	Tgfb1	peptidyl-threonine phosphorylation	0.626076
GO:0021536	1.45401	0.506896	29	1	Lef1	diencephalon development	0.626076
GO:0030168	1.45401	0.506896	29	1	Syk	platelet activation	0.626076
GO:0030593	1.45401	0.506896	29	1	Syk	neutrophil chemotaxis	0.626076
GO:0035019	1.45401	0.506896	29	1	Lig4	somatic stem cell maintenance	0.626076
GO:2000177	1.45401	0.506896	29	1	Cd24a	regulation of neural precursor cell proliferation	0.626076
GO:0001890	1.2755	0.514829	99	3	Trim28,Prdx3,Lef1	placenta development	0.629543
GO:0048871	1.2755	0.514829	99	3	Stat3,Syk,Cbl	multicellular organismal homeostasis	0.629543
GO:0000956	1.40363	0.518804	30	1	Dcp2	nuclear-transcribed mRNA catabolic process	0.629543
GO:0006457	1.40363	0.518804	30	1	Sh3glb1	protein folding	0.629543
GO:0008543	1.40363	0.518804	30	1	Prkd2	fibroblast growth factor receptor signaling pathway	0.629543
GO:0021695	1.40363	0.518804	30	1	Ezh2	cerebellar cortex development	0.629543
GO:0030177	1.40363	0.518804	30	1	Mbd2	positive regulation of Wnt receptor signaling pathway	0.629543
GO:0030216	1.40363	0.518804	30	1	Smarca4	keratinocyte differentiation	0.629543
GO:0043367	1.40363	0.518804	30	1	Lef1	CD4-positive, alpha-beta T cell differentiation	0.629543
GO:0048066	1.40363	0.518804	30	1	Lef1	developmental pigmentation	0.629543
GO:0050821	1.40363	0.518804	30	1	Tcf3	protein stabilization	0.629543
GO:0061371	1.40363	0.518804	30	1	Eng	determination of heart left/right asymmetry	0.629543
GO:0006959	1.35663	0.530427	31	1	Cd37	humoral immune response	0.637127
GO:0032412	1.35663	0.530427	31	1	Dapk1	regulation of ion transmembrane transporter activity	0.637127
GO:0035710	1.35663	0.530427	31	1	Lef1	CD4-positive, alpha-beta T cell activation	0.637127
GO:0044344	1.35663	0.530427	31	1	Prkd2	cellular response to fibroblast growth factor stimulus	0.637127
GO:0060603	1.35663	0.530427	31	1	Tgfb1	mammary gland duct morphogenesis	0.637127
GO:0065004	1.35663	0.530427	31	1	Smarca4	protein-DNA complex assembly	0.637127
GO:2000648	1.35663	0.530427	31	1	Foxp1	positive regulation of stem cell proliferation	0.637127
GO:0051090	1.38842	0.539641	122	4	Tcf3,Foxp1,Wwp2,Prkd2	regulation of sequence-specific DNA binding transcription factor activity	0.640556
GO:0071345	1.38842	0.539641	122	4	Zbp1,Gbp7,Cd24a,Igtp	cellular response to cytokine stimulus	0.640556
GO:0007589	1.31264	0.541772	32	1	Socs2	body fluid secretion	0.640556
GO:0008088	1.31264	0.541772	32	1	Dtnbp1	axon cargo transport	0.640556
GO:0009128	1.31264	0.541772	32	1	Smarca4	purine nucleoside monophosphate catabolic process	0.640556
GO:0031016	1.31264	0.541772	32	1	Xbp1	pancreas development	0.640556
GO:0045665	1.31264	0.541772	32	1	Cd24a	negative regulation of neuron differentiation	0.640556
GO:0060401	1.31264	0.541772	32	1	Lck	cytosolic calcium ion transport	0.640556
GO:0060402	1.31264	0.541772	32	1	Lck	calcium ion transport into cytosol	0.640556
GO:0060688	1.31264	0.541772	32	1	Tgfb1	regulation of morphogenesis of a branching structure	0.640556
GO:0071621	1.31264	0.541772	32	1	Syk	granulocyte chemotaxis	0.640556
GO:0014070	1.34193	0.547118	126	4	Tgfb1,Alpl,Ly6d,Cd24a	response to organic cyclic compound	0.641444
GO:0002224	1.27139	0.552844	33	1	Tnip1	toll-like receptor signaling pathway	0.641444
GO:0007416	1.27139	0.552844	33	1	Nrxn2	synapse assembly	0.641444
GO:0014033	1.27139	0.552844	33	1	Lef1	neural crest cell differentiation	0.641444
GO:0032507	1.27139	0.552844	33	1	Sgol1	maintenance of protein location in cell	0.641444
GO:0050707	1.27139	0.552844	33	1	Syk	regulation of cytokine secretion	0.641444
GO:0050764	1.27139	0.552844	33	1	Syk	regulation of phagocytosis	0.641444
GO:0050920	1.27139	0.552844	33	1	Tgfb1	regulation of chemotaxis	0.641444
GO:0055008	1.27139	0.552844	33	1	Ly6e	cardiac muscle tissue morphogenesis	0.641444
GO:0060113	1.27139	0.552844	33	1	Cux1	inner ear receptor cell differentiation	0.641444
GO:0060415	1.27139	0.552844	33	1	Ly6e	muscle tissue morphogenesis	0.641444
GO:0060675	1.27139	0.552844	33	1	Gzf1	ureteric bud morphogenesis	0.641444
GO:0060711	1.27139	0.552844	33	1	Lef1	labyrinthine layer development	0.641444
GO:0061138	1.309	0.553342	129	4	Tgfb1,Eng,Gzf1,Lef1	morphogenesis of a branching epithelium	0.641444
GO:0003073	1.23265	0.563651	34	1	Enpep	regulation of systemic arterial blood pressure	0.647964
GO:0003143	1.23265	0.563651	34	1	Eng	embryonic heart tube morphogenesis	0.647964
GO:0006476	1.23265	0.563651	34	1	Tgfb1	protein deacetylation	0.647964
GO:0006919	1.23265	0.563651	34	1	Lck	activation of cysteine-type endopeptidase activity involved in apoptotic process	0.647964
GO:0032387	1.23265	0.563651	34	1	Pkig	negative regulation of intracellular transport	0.647964
GO:0032649	1.23265	0.563651	34	1	Tnfrsf13c	regulation of interferon-gamma production	0.647964
GO:0001763	1.25749	0.564744	134	4	Tgfb1,Eng,Gzf1,Lef1	morphogenesis of a branching structure	0.648323
GO:0006641	1.19618	0.574198	35	1	Fitm2	triglyceride metabolic process	0.652499
GO:0007269	1.19618	0.574198	35	1	Nrxn2	neurotransmitter secretion	0.652499
GO:0007623	1.19618	0.574198	35	1	Arntl	circadian rhythm	0.652499
GO:0016050	1.19618	0.574198	35	1	Dtnbp1	vesicle organization	0.652499
GO:0042157	1.19618	0.574198	35	1	Ldlr	lipoprotein metabolic process	0.652499
GO:0045787	1.19618	0.574198	35	1	Tcf3	positive regulation of cell cycle	0.652499
GO:0055007	1.19618	0.574198	35	1	Foxp1	cardiac muscle cell differentiation	0.652499
GO:0043010	1.21905	0.574671	138	4	Tgfb1,Ikzf1,Yy1,Pou2f1	camera-type eye development	0.652499
GO:0001909	1.1618	0.584492	36	1	Tap1	leukocyte mediated cytotoxicity	0.655105
GO:0003208	1.1618	0.584492	36	1	Ly6e	cardiac ventricle morphogenesis	0.655105
GO:0006839	1.1618	0.584492	36	1	Sh3glb1	mitochondrial transport	0.655105
GO:0021510	1.1618	0.584492	36	1	Foxp1	spinal cord development	0.655105
GO:0031123	1.1618	0.584492	36	1	Cpsf6	RNA 3'-end processing	0.655105
GO:0048644	1.1618	0.584492	36	1	Ly6e	muscle organ morphogenesis	0.655105
GO:0050777	1.1618	0.584492	36	1	Spn	negative regulation of immune response	0.655105
GO:0051099	1.1618	0.584492	36	1	Smarca4	positive regulation of binding	0.655105
GO:0051899	1.1618	0.584492	36	1	Hsh2d	membrane depolarization	0.655105
GO:0001656	1.12933	0.594539	37	1	Id3	metanephros development	0.655105
GO:0001707	1.12933	0.594539	37	1	Lef1	mesoderm formation	0.655105
GO:0002761	1.12933	0.594539	37	1	Ikzf1	regulation of myeloid leukocyte differentiation	0.655105
GO:0006413	1.12933	0.594539	37	1	Eif3h	translational initiation	0.655105
GO:0010951	1.12933	0.594539	37	1	Lef1	negative regulation of endopeptidase activity	0.655105
GO:0035272	1.12933	0.594539	37	1	Xbp1	exocrine system development	0.655105
GO:0043112	1.12933	0.594539	37	1	Tgfb1	receptor metabolic process	0.655105
GO:0051092	1.12933	0.594539	37	1	Prkd2	positive regulation of NF-kappaB transcription factor activity	0.655105
GO:0001654	1.30493	0.595982	162	5	Tgfb1,Stat3,Ikzf1,Yy1,Pou2f1	eye development	0.655105
GO:0032880	1.30493	0.595982	162	5	Tgfb1,Tgfb3,Syk,Pkig,Sh3glb1	regulation of protein localization	0.655105
GO:0060537	1.29643	0.597071	163	5	Tgfb1,Ly6e,Eng,Lef1,Foxp1	muscle tissue development	0.655105
GO:0051347	1.28803	0.598209	164	5	Tgfb1,Map2k7,Syk,Cd24a,Strada	positive regulation of transferase activity	0.655105
GO:0001756	1.09861	0.604346	38	1	Lef1	somitogenesis	0.655105
GO:0006261	1.09861	0.604346	38	1	Lig4	DNA-dependent DNA replication	0.655105
GO:0006402	1.09861	0.604346	38	1	Dcp2	mRNA catabolic process	0.655105
GO:0008203	1.09861	0.604346	38	1	Ldlr	cholesterol metabolic process	0.655105
GO:0008277	1.09861	0.604346	38	1	Dtnbp1	regulation of G-protein coupled receptor protein signaling pathway	0.655105
GO:0032675	1.09861	0.604346	38	1	Vimp	regulation of interleukin-6 production	0.655105
GO:0042475	1.09861	0.604346	38	1	Lef1	odontogenesis of dentin-containing tooth	0.655105
GO:0042490	1.09861	0.604346	38	1	Cux1	mechanoreceptor differentiation	0.655105
GO:0045732	1.09861	0.604346	38	1	Sgsm3	positive regulation of protein catabolic process	0.655105
GO:0046620	1.09861	0.604346	38	1	Foxp1	regulation of organ growth	0.655105
GO:0050680	1.09861	0.604346	38	1	Tgfb1	negative regulation of epithelial cell proliferation	0.655105
GO:0051896	1.09861	0.604346	38	1	Tgfb1	regulation of protein kinase B signaling cascade	0.655105
GO:0000226	1.2476	0.604591	169	5	Rock2,Son,Sgol1,Smc3,Numa1	microtubule cytoskeleton organization	0.655105
GO:0001655	1.2476	0.604591	169	5	Tgfb1,Id3,Gzf1,Enpep,Cd24a	urogenital system development	0.655105
GO:0007492	1.06948	0.613916	39	1	Tgfb1	endoderm development	0.662614
GO:0022618	1.06948	0.613916	39	1	Celf2	ribonucleoprotein complex assembly	0.662614
GO:0051651	1.06948	0.613916	39	1	Sgol1	maintenance of location in cell	0.662614
GO:0010466	1.04192	0.623257	40	1	Lef1	negative regulation of peptidase activity	0.66835
GO:0016125	1.04192	0.623257	40	1	Ldlr	sterol metabolic process	0.66835
GO:0030258	1.04192	0.623257	40	1	Scd1	lipid modification	0.66835
GO:0045185	1.04192	0.623257	40	1	Sgol1	maintenance of protein location	0.66835
GO:0048332	1.04192	0.623257	40	1	Lef1	mesoderm morphogenesis	0.66835
GO:0007568	1.45743	0.650487	58	2	Zmiz1,Eng	aging	0.693074
GO:0018105	1.45743	0.650487	58	2	Tgfb1,Camk2d	peptidyl-serine phosphorylation	0.693074
GO:0030522	1.45743	0.650487	58	2	Lef1,Ezh2	intracellular receptor mediated signaling pathway	0.693074
GO:0035265	1.45743	0.650487	58	2	Ly6e,Foxp1	organ growth	0.693074
GO:0043524	1.45743	0.650487	58	2	Tgfb3,Lig4	negative regulation of neuron apoptotic process	0.693074
GO:0061351	1.38258	0.658351	61	2	Lef1,Cd24a	neural precursor cell proliferation	0.700553
GO:0021543	1.3593	0.661122	62	2	Lef1,Xrcc1	pallium development	0.700807
GO:0043281	1.3593	0.661122	62	2	Lck,Lef1	regulation of cysteine-type endopeptidase activity involved in apoptotic process	0.700807
GO:0051091	1.3593	0.661122	62	2	Tcf3,Prkd2	positive regulation of sequence-specific DNA binding transcription factor activity	0.700807
GO:0030326	1.25361	0.675882	67	2	Lef1,Smarca4	embryonic limb morphogenesis	0.715539
GO:0007519	1.2344	0.678984	68	2	Tgfb1,Foxp1	skeletal muscle tissue development	0.716083
GO:0046328	1.2344	0.678984	68	2	Map2k7,Syk	regulation of JNK cascade	0.716083
GO:0060538	1.2344	0.678984	68	2	Tgfb1,Foxp1	skeletal muscle organ development	0.716083
GO:0001892	1.19766	0.685306	70	2	Trim28,Lef1	embryonic placenta development	0.720917
GO:0001894	1.19766	0.685306	70	2	Syk,Cbl	tissue homeostasis	0.720917
GO:0051648	1.18009	0.688518	71	2	Cd24a,Dtnbp1	vesicle localization	0.72338
GO:0045088	1.16302	0.69176	72	2	Zbp1,Tnip1	regulation of innate immune response	0.725867
GO:0009306	1.1303	0.698321	74	2	Tgfb1,Syk	protein secretion	0.729064
GO:0045637	1.1303	0.698321	74	2	Ikzf1,Ets1	regulation of myeloid cell differentiation	0.729064
GO:0045786	1.1303	0.698321	74	2	Tgfb1,Uhrf2	negative regulation of cell cycle	0.729064
GO:0060560	1.1303	0.698321	74	2	Tgfb1,Trim28	developmental growth involved in morphogenesis	0.729064
GO:0006091	1.11461	0.701633	75	2	Dld,Cisd1	generation of precursor metabolites and energy	0.729768
GO:0007163	1.11461	0.701633	75	2	Cyth1,Numa1	establishment or maintenance of cell polarity	0.729768
GO:0042176	1.11461	0.701633	75	2	Sgsm3,Arntl	regulation of protein catabolic process	0.729768
GO:0015672	1.09935	0.704962	76	2	Tgfb1,Camk2d	monovalent inorganic cation transport	0.732314
GO:0032872	1.08448	0.708306	77	2	Map2k7,Syk	regulation of stress-activated MAPK cascade	0.734868
GO:0007254	1.07	0.711663	78	2	Map2k7,Syk	JNK cascade	0.736509
GO:0050900	1.07	0.711663	78	2	Syk,Cd24a	leukocyte migration	0.736509
GO:2000027	1.05597	0.715028	79	2	Tgfb1,Foxp1	regulation of organ morphogenesis	0.73907
GO:0051098	1.04223	0.718401	80	2	Tgfb1,Smarca4	regulation of binding	0.741633
GO:0030111	1.02884	0.721779	81	2	Mbd2,Lef1	regulation of Wnt receptor signaling pathway	0.744194
GO:0045444	1.23617	0.736975	102	3	Tgfb1,Plac8,Scd1	fat cell differentiation	0.75892
GO:0061448	1.22359	0.738233	103	3	Mef2d,Tgfb1,Glg1	connective tissue development	0.759273
GO:0045165	1.21125	0.739536	104	3	Tcf3,Pou2f1,Smarca4	cell fate commitment	0.759671
GO:0048705	1.17566	0.743696	107	3	Mef2d,Glg1,Alpl	skeletal system morphogenesis	0.763
GO:0006875	1.14207	0.748199	110	3	Lck,Tgfb1,Cd24a	cellular metal ion homeostasis	0.766673
GO:0010564	1.11031	0.753005	113	3	Tgfb1,Rock2,Uhrf2	regulation of cell cycle process	0.770647
GO:0050673	1.1001	0.754667	114	3	Tgfb1,Foxp1,Prkd2	epithelial cell proliferation	0.771397
GO:0007264	1.06109	0.76158	118	3	Rock2,Kifap3,Sgsm3	small GTPase mediated signal transduction	0.77655
GO:0008544	1.06109	0.76158	118	3	Ezh2,Cux1,Smarca4	epidermis development	0.77655
GO:0006873	1.04255	0.765176	120	3	Lck,Tgfb1,Cd24a	cellular ion homeostasis	0.779259
GO:0055082	1.14866	0.780159	146	4	Lck,Tgfb1,Cd24a,Fitm2	cellular chemical homeostasis	0.793544
GO:0001525	1.07107	0.789678	156	4	Eng,Lef1,Enpep,Prkd2	angiogenesis	0.802243
GO:0014706	1.05682	0.791866	158	4	Tgfb1,Ly6e,Lef1,Foxp1	striated muscle tissue development	0.803483
GO:0050801	1.03603	0.7953	161	4	Lck,Tgfb1,Cd24a,Hsh2d	ion homeostasis	0.805981
GO:0001501	1.08943	0.808412	192	5	Mef2d,Tgfb1,Glg1,Wdr5,Alpl	skeletal system development	0.818271
GO:0000302	1.01567	1	41	1	Prdx3	response to reactive oxygen species	1
GO:0006639	1.01567	1	41	1	Fitm2	acylglycerol metabolic process	1
GO:0007126	1.00306	1	83	2	Smc3,Smc1a	meiosis	1
GO:0030278	1.00306	1	83	2	Tgfb1,Id3	regulation of ossification	1
GO:0031638	1.01567	1	41	1	Lck	zymogen activation	1
GO:0034599	1.01567	1	41	1	Prdx3	cellular response to oxidative stress	1
GO:0035108	1.00306	1	83	2	Lef1,Smarca4	limb morphogenesis	1
GO:0043280	1.01567	1	41	1	Lck	positive regulation of cysteine-type endopeptidase activity involved in apoptotic process	1
GO:0043434	1.00306	1	83	2	Stat3,Mzb1	response to peptide hormone stimulus	1
GO:0060443	1.01567	1	41	1	Tgfb1	mammary gland morphogenesis	1

## Sheet: cl 1 transdiff hallmark 
	odds.ratio	p.value	n.categoy	n.category.and.component	genes	FDR
HALLMARK_OXIDATIVE_PHOSPHORYLATION	2.5622	0.00553011	191	12	Sdhb,Timm13,Mdh1,Dld,Aco2,Ndufa5,Cox7a2l,Prdx3,Atp1b1,Uqcrc2,Hccs,Uqcrh	0.111702
HALLMARK_INTERFERON_ALPHA_RESPONSE	3.38379	0.00770358	84	7	Cnp,Wars,Psme1,Ly6e,Psmb8,Elf1,Tap1	0.111702
HALLMARK_ALLOGRAFT_REJECTION	2.4198	0.0193439	148	9	Ccnd2,Lck,Tgfb1,Cd79a,Wars,Hcls1,Ets1,Ccnd3,Tap1	0.140243
HALLMARK_KRAS_SIGNALING_UP	2.4198	0.0193439	148	9	Ccnd2,Ikzf1,Tspan13,Psmb8,Eng,Cd37,Ets1,Cbl,Akap12	0.140243
HALLMARK_INTERFERON_GAMMA_RESPONSE	2.17424	0.0431629	163	9	Stat3,Psma2,Wars,Psme1,Ly6e,Pim1,Psmb8,Zbp1,Tap1	0.225373
HALLMARK_IL6_JAK_STAT3_SIGNALING	2.72587	0.0466289	72	5	Tgfb1,Stat3,Pim1,Dntt,Cbl	0.225373
HALLMARK_ADIPOGENESIS	1.70179	0.156619	180	8	Slc25a1,Sdhb,Dld,Aco2,Ndufa5,Prdx3,Preb,Chchd10	0.554324
HALLMARK_TGF_BETA_SIGNALING	2.24735	0.164065	51	3	Tgfb1,Id3,Eng	0.554324
HALLMARK_WNT_BETA_CATENIN_SIGNALING	2.6513	0.189016	29	2	Ccnd2,Lef1	0.554324
HALLMARK_UNFOLDED_PROTEIN_RESPONSE	1.73721	0.224922	109	5	Xbp1,Exoc2,Dcp2,Asns,Preb	0.554324
HALLMARK_HYPOXIA	1.57848	0.226817	168	7	Slc25a1,Tgfb3,Pim1,Plac8,Ets1,Akap12,Chst3	0.554324
HALLMARK_IL2_STAT5_SIGNALING	1.56826	0.229376	169	7	Ccnd2,Socs2,Xbp1,Pim1,Pou2f1,Ccnd3,Cd79b	0.554324
HALLMARK_ANDROGEN_RESPONSE	1.69177	0.309084	89	4	Zmiz1,Xrcc6,Ccnd3,Akap12	0.68569
HALLMARK_P53_PATHWAY	1.42882	0.350635	184	7	Ccnd2,Tgfb1,Mknk2,Dgka,Lrmp,Ccnd3,Tap1	0.68569
HALLMARK_MTORC1_SIGNALING	1.39554	0.359115	188	7	Xbp1,Wars,Cops5,Arpc5l,Psmc2,Asns,Ldlr	0.68569
HALLMARK_PANCREAS_BETA_CELLS	2.22132	0.378312	17	1	Dpp4	0.68569
HALLMARK_FATTY_ACID_METABOLISM	1.44835	0.403311	129	5	Mdh1,Dld,Psme1,Aco2,Hccs	0.688001
HALLMARK_E2F_TARGETS	1.34829	0.492908	194	7	Rpa3,Dek,Xrcc6,Smc3,Psip1,Ezh2,Smc1a	0.714061
HALLMARK_G2M_CHECKPOINT	1.34071	0.493946	195	7	Tgfb1,Cbx1,Ezh2,H2afv,Smc1a,Numa1,Top1	0.714061
HALLMARK_MYC_TARGETS_V1	1.31844	0.497417	198	7	Trim28,Psma2,Dek,Xrcc6,Prdx3,Cops5,Cnbp	0.714061
HALLMARK_ANGIOGENESIS	1.41814	0.517078	26	1	Ccnd2	0.714061
HALLMARK_CHOLESTEROL_HOMEOSTASIS	1.18204	0.688108	62	2	Ldlr,Ethe1	0.810678
HALLMARK_PI3K_AKT_MTOR_SIGNALING	1.12001	0.750919	98	3	Lck,Mknk2,Rptor	0.810678
HALLMARK_UV_RESPONSE_UP	1.14633	0.779431	128	4	Cnp,Asns,Ccnd3,Tap1	0.810678
HALLMARK_UV_RESPONSE_DN	1.12745	0.781459	130	4	Celf2,Zmiz1,Ldlr,Pik3cd	0.810678
HALLMARK_DNA_REPAIR	1.09143	0.78594	134	4	Polr2a,Rpa3,Hcls1,Taf1c	0.810678
HALLMARK_MYOGENESIS	1.03351	0.794952	141	4	Mef2d,Tgfb1,Bin1,Ablim1	0.810678
HALLMARK_HEME_METABOLISM	1.13261	0.803158	162	5	Rbm38,Asns,Pgls,Ccnd3,Top1	0.810678
HALLMARK_GLYCOLYSIS	1.06158	0.810678	172	5	Mdh1,Dld,Galk2,Pgls,Polr3k	0.810678

## Sheet: cl 2 transdiff GO
	odds.ratio	p.value	n.categoy	n.category.and.component	genes	description	FDR
GO:0007398	61.6545	0.0194203	11	1	Tpt1	ectoderm development	0.184444
GO:0000002	56.0949	0.0211688	12	1	Rrm2b	mitochondrial genome maintenance	0.184444
GO:0001885	56.0949	0.0211688	12	1	Pde4d	endothelial cell development	0.184444
GO:0043984	56.0949	0.0211688	12	1	Kansl2	histone H4-K16 acetylation	0.184444
GO:0006826	51.3881	0.0229146	13	1	Heph	iron ion transport	0.184444
GO:0031529	51.3881	0.0229146	13	1	Lima1	ruffle organization	0.184444
GO:0009262	47.4627	0.0246575	14	1	Rrm2b	deoxyribonucleotide metabolic process	0.184444
GO:0043981	44.1075	0.0263976	15	1	Kansl2	histone H4-K5 acetylation	0.184444
GO:0043982	44.1075	0.0263976	15	1	Kansl2	histone H4-K8 acetylation	0.184444
GO:0048599	38.6179	0.0298695	17	1	Shb	oocyte development	0.184444
GO:0009994	36.3338	0.0316013	18	1	Shb	oocyte differentiation	0.184444
GO:0043244	34.312	0.0333302	19	1	Lima1	regulation of protein complex disassembly	0.184444
GO:0046058	30.9086	0.0367799	21	1	Pde4d	cAMP metabolic process	0.184444
GO:0045446	29.441	0.0385005	22	1	Pde4d	endothelial cell differentiation	0.184444
GO:0007631	28.1072	0.0402184	23	1	Agrp	feeding behavior	0.184444
GO:0003158	26.8891	0.0419335	24	1	Pde4d	endothelium development	0.184444
GO:0003014	24.7416	0.0453555	26	1	Rrm2b	renal system process	0.184444
GO:0006939	24.7416	0.0453555	26	1	Pde4d	smooth muscle contraction	0.184444
GO:0043241	22.8793	0.0487664	28	1	Lima1	protein complex disassembly	0.184444
GO:0030593	22.0693	0.0504678	29	1	Pde4d	neutrophil chemotaxis	0.184444
GO:0048477	20.6108	0.0538623	31	1	Shb	oogenesis	0.184444
GO:0043967	19.9369	0.0555555	32	1	Kansl2	histone H4 acetylation	0.184444
GO:0051017	19.9369	0.0555555	32	1	Lima1	actin filament bundle assembly	0.184444
GO:0051494	19.9369	0.0555555	32	1	Lima1	negative regulation of cytoskeleton organization	0.184444
GO:0071621	19.9369	0.0555555	32	1	Pde4d	granulocyte chemotaxis	0.184444
GO:0009187	18.7196	0.0589336	34	1	Pde4d	cyclic nucleotide metabolic process	0.188134
GO:0006261	16.6913	0.0656573	38	1	Rrm2b	DNA-dependent DNA replication	0.19309
GO:0008064	14.6983	0.0740011	43	1	Lima1	regulation of actin polymerization or depolymerization	0.19309
GO:0042100	14.6983	0.0740011	43	1	Shb	B cell proliferation	0.19309
GO:0030832	14.3556	0.0756618	44	1	Lima1	regulation of actin filament length	0.19309
GO:0050795	14.0286	0.0773198	45	1	Agrp	regulation of behavior	0.19309
GO:0007292	13.1204	0.0822777	48	1	Shb	female gamete generation	0.19309
GO:0030595	12.5843	0.0855697	50	1	Pde4d	leukocyte chemotaxis	0.19309
GO:0071222	12.5843	0.0855697	50	1	Pde4d	cellular response to lipopolysaccharide	0.19309
GO:0016573	11.8533	0.0904878	53	1	Kansl2	histone acetylation	0.19309
GO:0018393	11.8533	0.0904878	53	1	Kansl2	internal peptidyl-lysine acetylation	0.19309
GO:0009165	11.628	0.0921218	54	1	Rrm2b	nucleotide biosynthetic process	0.19309
GO:0008154	11.4119	0.0937532	55	1	Lima1	actin polymerization or depolymerization	0.19309
GO:0071219	11.4119	0.0937532	55	1	Pde4d	cellular response to molecule of bacterial origin	0.19309
GO:0006475	11.2048	0.095382	56	1	Kansl2	internal protein amino acid acetylation	0.19309
GO:0018394	11.2048	0.095382	56	1	Kansl2	peptidyl-lysine acetylation	0.19309
GO:0007568	10.8043	0.0986316	58	1	Pde4d	aging	0.193511
GO:0060326	10.6171	0.100253	59	1	Pde4d	cell chemotaxis	0.193511
GO:0048469	10.0884	0.105099	62	1	Shb	cell maturation	0.195443
GO:0006473	9.92863	0.10671	63	1	Kansl2	protein acetylation	0.195443
GO:0034504	9.76858	0.108318	64	1	Rpl11	protein localization to nucleus	0.195443
GO:0006936	9.17814	0.114723	68	1	Pde4d	muscle contraction	0.201751
GO:0018205	8.65478	0.121086	72	1	Kansl2	peptidyl-lysine modification	0.201751
GO:0002064	8.41614	0.124253	74	1	Pde4d	epithelial cell development	0.201751
GO:0032956	8.41614	0.124253	74	1	Lima1	regulation of actin cytoskeleton organization	0.201751
GO:0003012	7.97392	0.130555	78	1	Pde4d	muscle system process	0.201751
GO:0030534	7.97392	0.130555	78	1	Agrp	adult behavior	0.201751
GO:0050900	7.97392	0.130555	78	1	Pde4d	leukocyte migration	0.201751
GO:0019827	7.8705	0.132124	79	1	Tpt1	stem cell maintenance	0.201751
GO:0071396	7.76973	0.133691	80	1	Pde4d	cellular response to lipid	0.201751
GO:0032970	7.57571	0.136816	82	1	Lima1	regulation of actin filament-based process	0.202781
GO:0006260	7.21214	0.143037	86	1	Rrm2b	DNA replication	0.208281
GO:0006979	7.04459	0.146132	88	1	Rrm2b	response to oxidative stress	0.208545
GO:0032535	6.88458	0.149217	90	1	Lima1	regulation of cellular component size	0.208545
GO:0032496	6.80713	0.150756	91	1	Pde4d	response to lipopolysaccharide	0.208545
GO:0035264	6.24293	0.162976	99	1	Pde4d	multicellular organism growth	0.221754
GO:0007281	6.11598	0.166006	101	1	Shb	germ cell development	0.222234
GO:0007015	5.99401	0.169026	103	1	Lima1	actin filament organization	0.222686
GO:0002237	5.87672	0.172037	105	1	Pde4d	response to molecule of bacterial origin	0.22311
GO:0042113	5.30398	0.18842	116	1	Shb	B cell activation	0.240598
GO:0032943	5.07895	0.19577	121	1	Shb	mononuclear cell proliferation	0.240771
GO:0046651	5.07895	0.19577	121	1	Shb	lymphocyte proliferation	0.240771
GO:0006412	4.95247	0.200151	124	1	Rps29	translation	0.240771
GO:0070661	4.91131	0.201606	125	1	Shb	leukocyte proliferation	0.240771
GO:0051493	4.8709	0.20306	126	1	Lima1	regulation of cytoskeleton organization	0.240771
GO:0007005	4.60759	0.213166	133	1	Rrm2b	mitochondrion organization	0.249194
GO:0001822	4.43543	0.220313	138	1	Rrm2b	kidney development	0.250493
GO:0048864	4.43543	0.220313	138	1	Tpt1	stem cell development	0.250493
GO:0072001	4.30645	0.22599	142	1	Rrm2b	renal system development	0.253475
GO:0009617	3.98714	0.241408	153	1	Pde4d	response to bacterium	0.264692
GO:0007186	3.96039	0.242795	154	1	Agrp	G-protein coupled receptor signaling pathway	0.264692
GO:0033993	3.88222	0.246945	157	1	Pde4d	response to lipid	0.264692
GO:0006281	3.80702	0.251075	160	1	Rrm2b	DNA repair	0.264692
GO:0048863	3.78259	0.252447	161	1	Tpt1	stem cell differentiation	0.264692
GO:0033365	3.68704	0.257912	165	1	Rpl11	protein localization to organelle	0.264692
GO:0016570	3.61904	0.261987	168	1	Kansl2	histone modification	0.264692
GO:0001655	3.59692	0.263341	169	1	Rrm2b	urogenital system development	0.264692
GO:0006935	3.57506	0.264692	170	1	Pde4d	chemotaxis	0.264692

## Sheet: cl 2 transdiff hallmark
	odds.ratio	p.value	n.categoy	n.category.and.component	genes	FDR
HALLMARK_DNA_REPAIR	8.53706	0.0345366	134	2	Rrm2b,Sf3a3	0.241756
HALLMARK_PI3K_AKT_MTOR_SIGNALING	5.03253	0.202062	98	1	Mapkap1	0.37049
HALLMARK_UV_RESPONSE_DN	3.74999	0.259797	130	1	Kalrn	0.37049
HALLMARK_ALLOGRAFT_REJECTION	3.27404	0.290639	148	1	Rpl9	0.37049
HALLMARK_APICAL_JUNCTION	3.01637	0.31057	160	1	Lima1	0.37049
HALLMARK_P53_PATHWAY	2.60224	0.348967	184	1	Rps12	0.37049
HALLMARK_MYC_TARGETS_V1	2.40728	0.37049	198	1	Rpl6	0.37049

## Sheet: cl 3 transdiff GO
	odds.ratio	p.value	n.categoy	n.category.and.component	genes	description	FDR
GO:0006302	18.6526	0.0075736	76	2	Sod1,Sfr1	double-strand break repair	0.143266
GO:0006875	12.7097	0.0154243	110	2	Prkcb,Sod1	cellular metal ion homeostasis	0.143266
GO:0006695	68.3928	0.017669	10	1	Sod1	cholesterol biosynthetic process	0.143266
GO:0016572	68.3928	0.017669	10	1	Prkcb	histone phosphorylation	0.143266
GO:0018279	68.3928	0.017669	10	1	Krtcap2	protein N-linked glycosylation via asparagine	0.143266
GO:0022011	68.3928	0.017669	10	1	Sod1	myelination in peripheral nervous system	0.143266
GO:0060117	68.3928	0.017669	10	1	Sod1	auditory receptor cell development	0.143266
GO:0006873	11.6128	0.0181963	120	2	Prkcb,Sod1	cellular ion homeostasis	0.143266
GO:0006412	11.2291	0.0193611	124	2	Eef1b2,Eif3g	translation	0.143266
GO:0019430	61.6545	0.0194203	11	1	Sod1	removal of superoxide radicals	0.143266
GO:0042554	61.6545	0.0194203	11	1	Sod1	superoxide anion generation	0.143266
GO:0045471	61.6545	0.0194203	11	1	Sod1	response to ethanol	0.143266
GO:0046627	61.6545	0.0194203	11	1	Prkcb	negative regulation of insulin receptor signaling pathway	0.143266
GO:0060122	61.6545	0.0194203	11	1	Sod1	inner ear receptor stereocilium organization	0.143266
GO:0000303	56.0949	0.0211688	12	1	Sod1	response to superoxide	0.143266
GO:0006309	56.0949	0.0211688	12	1	Sod1	apoptotic DNA fragmentation	0.143266
GO:0006879	56.0949	0.0211688	12	1	Sod1	cellular iron ion homeostasis	0.143266
GO:0010829	56.0949	0.0211688	12	1	Prkcb	negative regulation of glucose transport	0.143266
GO:0014044	56.0949	0.0211688	12	1	Sod1	Schwann cell development	0.143266
GO:0016126	56.0949	0.0211688	12	1	Sod1	sterol biosynthetic process	0.143266
GO:0042743	56.0949	0.0211688	12	1	Sod1	hydrogen peroxide metabolic process	0.143266
GO:0000305	51.3881	0.0229146	13	1	Sod1	response to oxygen radical	0.143266
GO:0030947	51.3881	0.0229146	13	1	Prkcb	regulation of vascular endothelial growth factor receptor signaling pathway	0.143266
GO:0050810	47.4627	0.0246575	14	1	Sod1	regulation of steroid biosynthetic process	0.143266
GO:0055082	9.47753	0.0263169	146	2	Prkcb,Sod1	cellular chemical homeostasis	0.143266
GO:0001895	44.1075	0.0263976	15	1	Sod1	retina homeostasis	0.143266
GO:0006940	44.1075	0.0263976	15	1	Sod1	regulation of smooth muscle contraction	0.143266
GO:0048678	44.1075	0.0263976	15	1	Sod1	response to axon injury	0.143266
GO:0051055	44.1075	0.0263976	15	1	Sod1	negative regulation of lipid biosynthetic process	0.143266
GO:0006414	41.2013	0.028135	16	1	Eef1b2	translational elongation	0.143266
GO:0030262	41.2013	0.028135	16	1	Sod1	apoptotic nuclear changes	0.143266
GO:0046626	41.2013	0.028135	16	1	Prkcb	regulation of insulin receptor signaling pathway	0.143266
GO:0051881	41.2013	0.028135	16	1	Sod1	regulation of mitochondrial membrane potential	0.143266
GO:0014037	38.6179	0.0298695	17	1	Sod1	Schwann cell differentiation	0.143266
GO:0045104	38.6179	0.0298695	17	1	Sod1	intermediate filament cytoskeleton organization	0.143266
GO:0006281	8.61572	0.0312066	160	2	Sod1,Sfr1	DNA repair	0.143266
GO:0050801	8.56007	0.0315691	161	2	Prkcb,Sod1	ion homeostasis	0.143266
GO:0006308	36.3338	0.0316013	18	1	Sod1	DNA catabolic process	0.143266
GO:0045103	36.3338	0.0316013	18	1	Sod1	intermediate filament-based process	0.143266
GO:0006487	34.312	0.0333302	19	1	Krtcap2	protein N-linked glycosylation	0.143266
GO:0007566	34.312	0.0333302	19	1	Sod1	embryo implantation	0.143266
GO:0042311	34.312	0.0333302	19	1	Sod1	vasodilation	0.143266
GO:0060119	34.312	0.0333302	19	1	Sod1	inner ear receptor cell development	0.143266
GO:0019725	8.13903	0.0345308	169	2	Prkcb,Sod1	cellular homeostasis	0.143266
GO:0008089	32.5314	0.0350564	20	1	Sod1	anterograde axon cargo transport	0.143266
GO:0042491	32.5314	0.0350564	20	1	Sod1	auditory receptor cell differentiation	0.143266
GO:0045833	32.5314	0.0350564	20	1	Sod1	negative regulation of lipid metabolic process	0.143266
GO:0050853	32.5314	0.0350564	20	1	Prkcb	B cell receptor signaling pathway	0.143266
GO:0042542	30.9086	0.0367799	21	1	Sod1	response to hydrogen peroxide	0.143266
GO:0009408	29.441	0.0385005	22	1	Sod1	response to heat	0.143266
GO:0048010	29.441	0.0385005	22	1	Prkcb	vascular endothelial growth factor receptor signaling pathway	0.143266
GO:0055072	29.441	0.0385005	22	1	Sod1	iron ion homeostasis	0.143266
GO:0006364	28.1072	0.0402184	23	1	Ebna1bp2	rRNA processing	0.143266
GO:0006801	28.1072	0.0402184	23	1	Sod1	superoxide metabolic process	0.143266
GO:0035315	28.1072	0.0402184	23	1	Sod1	hair cell differentiation	0.143266
GO:0006749	26.8891	0.0419335	24	1	Sod1	glutathione metabolic process	0.143266
GO:0034614	26.8891	0.0419335	24	1	Sod1	cellular response to reactive oxygen species	0.143266
GO:0019218	25.7723	0.0436459	25	1	Sod1	regulation of steroid metabolic process	0.143266
GO:0071322	25.7723	0.0436459	25	1	Prkcb	cellular response to carbohydrate stimulus	0.143266
GO:0006694	24.7416	0.0453555	26	1	Sod1	steroid biosynthetic process	0.143266
GO:0006939	24.7416	0.0453555	26	1	Sod1	smooth muscle contraction	0.143266
GO:0045766	24.7416	0.0453555	26	1	Prkcb	positive regulation of angiogenesis	0.143266
GO:0090305	24.7416	0.0453555	26	1	Sod1	nucleic acid phosphodiester bond hydrolysis	0.143266
GO:0001541	22.8793	0.0487664	28	1	Sod1	ovarian follicle development	0.1493
GO:0010827	22.8793	0.0487664	28	1	Prkcb	regulation of glucose transport	0.1493
GO:0018107	22.0693	0.0504678	29	1	Prkcb	peptidyl-threonine phosphorylation	0.152168
GO:0006937	20.6108	0.0538623	31	1	Sod1	regulation of muscle contraction	0.157627
GO:0007422	20.6108	0.0538623	31	1	Sod1	peripheral nervous system development	0.157627
GO:0008088	19.9369	0.0555555	32	1	Sod1	axon cargo transport	0.160225
GO:0000724	19.3096	0.0572459	33	1	Sfr1	double-strand break repair via homologous recombination	0.16045
GO:0060113	19.3096	0.0572459	33	1	Sod1	inner ear receptor cell differentiation	0.16045
GO:0046890	18.7196	0.0589336	34	1	Sod1	regulation of lipid biosynthetic process	0.162886
GO:0021782	18.1789	0.0606186	35	1	Sod1	glial cell development	0.163531
GO:0006413	17.1645	0.0639804	37	1	Eif3g	translational initiation	0.163531
GO:0051092	17.1645	0.0639804	37	1	Prkcb	positive regulation of NF-kappaB transcription factor activity	0.163531
GO:0008203	16.6913	0.0656573	38	1	Sod1	cholesterol metabolic process	0.163531
GO:0042490	16.6913	0.0656573	38	1	Sod1	mechanoreceptor differentiation	0.163531
GO:0022602	16.2504	0.0673315	39	1	Sod1	ovulation cycle process	0.163531
GO:0035150	16.2504	0.0673315	39	1	Sod1	regulation of tube size	0.163531
GO:0050880	16.2504	0.0673315	39	1	Sod1	regulation of blood vessel size	0.163531
GO:0016125	15.8323	0.0690029	40	1	Sod1	sterol metabolic process	0.163531
GO:0000302	15.4352	0.0706717	41	1	Sod1	response to reactive oxygen species	0.163531
GO:0009266	15.4352	0.0706717	41	1	Sod1	response to temperature stimulus	0.163531
GO:0009743	15.4352	0.0706717	41	1	Prkcb	response to carbohydrate stimulus	0.163531
GO:0034599	15.4352	0.0706717	41	1	Sod1	cellular response to oxidative stress	0.163531
GO:0042698	15.4352	0.0706717	41	1	Sod1	ovulation cycle	0.163531
GO:0015758	15.0577	0.0723377	42	1	Prkcb	glucose transport	0.165462
GO:0008286	14.6983	0.0740011	43	1	Prkcb	insulin receptor signaling pathway	0.165463
GO:0043123	14.6983	0.0740011	43	1	Prkcb	positive regulation of I-kappaB kinase/NF-kappaB cascade	0.165463
GO:0006518	14.0286	0.0773198	45	1	Sod1	peptide metabolic process	0.170691
GO:0008643	13.7162	0.0789751	46	1	Prkcb	carbohydrate transport	0.170691
GO:0000187	13.4062	0.0806278	47	1	Sod1	activation of MAPK activity	0.170691
GO:0006401	13.4062	0.0806278	47	1	Exosc5	RNA catabolic process	0.170691
GO:0042254	13.4062	0.0806278	47	1	Ebna1bp2	ribosome biogenesis	0.170691
GO:0030705	12.8483	0.0839251	49	1	Sod1	cytoskeleton-dependent intracellular transport	0.173696
GO:0007565	12.5843	0.0855697	50	1	Sod1	female pregnancy	0.173696
GO:0008217	12.5843	0.0855697	50	1	Sod1	regulation of blood pressure	0.173696
GO:0008585	12.5843	0.0855697	50	1	Sod1	female gonad development	0.173696
GO:0046545	12.0874	0.0888511	52	1	Sod1	development of primary female sexual characteristics	0.173696
GO:0050851	12.0874	0.0888511	52	1	Prkcb	antigen receptor-mediated signaling pathway	0.173696
GO:0042472	11.8533	0.0904878	53	1	Sod1	inner ear morphogenesis	0.173696
GO:0006486	11.628	0.0921218	54	1	Krtcap2	protein glycosylation	0.173696
GO:0042552	11.4119	0.0937532	55	1	Sod1	myelination	0.173696
GO:0072593	11.4119	0.0937532	55	1	Sod1	reactive oxygen species metabolic process	0.173696
GO:0042493	11.2048	0.095382	56	1	Sod1	response to drug	0.173696
GO:0045765	11.2048	0.095382	56	1	Prkcb	regulation of angiogenesis	0.173696
GO:0008366	10.9977	0.0970081	57	1	Sod1	axon ensheathment	0.173696
GO:0009913	10.9977	0.0970081	57	1	Sod1	epidermal cell differentiation	0.173696
GO:0070085	10.9977	0.0970081	57	1	Krtcap2	glycosylation	0.173696
GO:0007568	10.8043	0.0986316	58	1	Sod1	aging	0.173696
GO:0007605	10.8043	0.0986316	58	1	Sod1	sensory perception of sound	0.173696
GO:0040014	10.8043	0.0986316	58	1	Sod1	regulation of multicellular organism growth	0.173696
GO:0043524	10.8043	0.0986316	58	1	Sod1	negative regulation of neuron apoptotic process	0.173696
GO:0060047	10.6171	0.100253	59	1	Sod1	heart contraction	0.174761
GO:0007009	10.4359	0.101871	60	1	Sod1	plasma membrane organization	0.174761
GO:0042471	10.4359	0.101871	60	1	Sod1	ear morphogenesis	0.174761
GO:0002768	10.0884	0.105099	62	1	Prkcb	immune response-regulating cell surface receptor signaling pathway	0.175498
GO:0032869	10.0884	0.105099	62	1	Prkcb	cellular response to insulin stimulus	0.175498
GO:0051091	10.0884	0.105099	62	1	Prkcb	positive regulation of sequence-specific DNA binding transcription factor activity	0.175498
GO:0019228	9.92863	0.10671	63	1	Sod1	regulation of action potential in neuron	0.175498
GO:0050954	9.92863	0.10671	63	1	Sod1	sensory perception of mechanical stimulus	0.175498
GO:0043122	9.31784	0.113125	67	1	Prkcb	regulation of I-kappaB kinase/NF-kappaB cascade	0.184524
GO:0006936	9.17814	0.114723	68	1	Sod1	muscle contraction	0.185608
GO:0001894	8.90829	0.11791	70	1	Sod1	tissue homeostasis	0.187712
GO:0007018	8.90829	0.11791	70	1	Sod1	microtubule-based movement	0.187712
GO:0032868	8.65478	0.121086	72	1	Prkcb	response to insulin stimulus	0.190202
GO:0002064	8.41614	0.124253	74	1	Sod1	epithelial cell development	0.190202
GO:0008202	8.41614	0.124253	74	1	Sod1	steroid metabolic process	0.190202
GO:0019226	8.41614	0.124253	74	1	Sod1	transmission of nerve impulse	0.190202
GO:0043406	8.41614	0.124253	74	1	Sod1	positive regulation of MAP kinase activity	0.190202
GO:0010001	8.30108	0.125832	75	1	Sod1	glial cell differentiation	0.191033
GO:0032147	8.1891	0.127409	76	1	Sod1	activation of protein kinase activity	0.191033
GO:0009101	8.08009	0.128983	77	1	Krtcap2	glycoprotein biosynthetic process	0.191033
GO:0019216	8.08009	0.128983	77	1	Sod1	regulation of lipid metabolic process	0.191033
GO:0003012	7.97392	0.130555	78	1	Sod1	muscle system process	0.191033
GO:0048511	7.97392	0.130555	78	1	Sod1	rhythmic process	0.191033
GO:0006874	7.57571	0.136816	82	1	Prkcb	cellular calcium ion homeostasis	0.197293
GO:0007249	7.57571	0.136816	82	1	Prkcb	I-kappaB kinase/NF-kappaB cascade	0.197293
GO:0043434	7.48229	0.138375	83	1	Prkcb	response to peptide hormone stimulus	0.198105
GO:0007059	7.21214	0.143037	86	1	Ebna1bp2	chromosome segregation	0.198564
GO:0043523	7.21214	0.143037	86	1	Sod1	regulation of neuron apoptotic process	0.198564
GO:0055074	7.21214	0.143037	86	1	Prkcb	calcium ion homeostasis	0.198564
GO:0001819	7.12738	0.144585	87	1	Sod1	positive regulation of cytokine production	0.198564
GO:0010035	7.12738	0.144585	87	1	Sod1	response to inorganic substance	0.198564
GO:0002262	7.04459	0.146132	88	1	Sod1	myeloid cell homeostasis	0.198564
GO:0006979	7.04459	0.146132	88	1	Sod1	response to oxidative stress	0.198564
GO:0008406	6.96367	0.147676	89	1	Sod1	gonad development	0.198564
GO:1901214	6.96367	0.147676	89	1	Sod1	regulation of neuron death	0.198564
GO:0006310	6.73118	0.152292	92	1	Sfr1	DNA recombination	0.202041
GO:0071902	6.73118	0.152292	92	1	Sod1	positive regulation of protein serine/threonine kinase activity	0.202041
GO:0006790	6.51301	0.156886	95	1	Sod1	sulfur compound metabolic process	0.206757
GO:0048839	6.37517	0.159936	97	1	Sod1	inner ear development	0.207899
GO:0002764	6.30837	0.161457	98	1	Prkcb	immune response-regulating signaling pathway	0.207899
GO:0009100	6.24293	0.162976	99	1	Krtcap2	glycoprotein metabolic process	0.207899
GO:0035264	6.24293	0.162976	99	1	Sod1	multicellular organism growth	0.207899
GO:0048871	6.24293	0.162976	99	1	Sod1	multicellular organismal homeostasis	0.207899
GO:0051402	6.17882	0.164492	100	1	Sod1	neuron apoptotic process	0.208496
GO:0006816	6.05439	0.167517	102	1	Prkcb	calcium ion transport	0.210033
GO:0032870	5.99401	0.169026	103	1	Prkcb	cellular response to hormone stimulus	0.210033
GO:0002253	5.93479	0.170533	104	1	Prkcb	activation of immune response	0.210033
GO:0070997	5.93479	0.170533	104	1	Sod1	neuron death	0.210033
GO:0007626	5.87672	0.172037	105	1	Sod1	locomotory behavior	0.210033
GO:0051051	5.87672	0.172037	105	1	Prkcb	negative regulation of transport	0.210033
GO:0071417	5.709	0.176534	108	1	Prkcb	cellular response to organic nitrogen	0.214209
GO:0043583	5.65516	0.178028	109	1	Sod1	ear development	0.214713
GO:0007548	5.55043	0.18101	111	1	Sod1	sex differentiation	0.215694
GO:0055114	5.55043	0.18101	111	1	Aldh3a1	oxidation-reduction process	0.215694
GO:0006520	5.40104	0.185463	114	1	Sod1	cellular amino acid metabolic process	0.219685
GO:0042113	5.30398	0.18842	116	1	Prkcb	B cell activation	0.221867
GO:0008544	5.21175	0.191367	118	1	Sod1	epidermis development	0.222702
GO:0043405	5.21175	0.191367	118	1	Sod1	regulation of MAP kinase activity	0.222702
GO:0051090	5.03612	0.197233	122	1	Prkcb	regulation of sequence-specific DNA binding transcription factor activity	0.228193
GO:0010256	4.99398	0.198693	123	1	Sod1	endomembrane system organization	0.228554
GO:0008015	4.95247	0.200151	124	1	Sod1	blood circulation	0.228908
GO:0042391	4.60759	0.213166	133	1	Sod1	regulation of membrane potential	0.241023
GO:0043410	4.60759	0.213166	133	1	Sod1	positive regulation of MAPK cascade	0.241023
GO:0009725	4.5369	0.216032	135	1	Prkcb	response to hormone stimulus	0.241994
GO:0007600	4.46879	0.218889	137	1	Sod1	sensory perception	0.241994
GO:0043588	4.46879	0.218889	137	1	Sod1	skin development	0.241994
GO:0045860	4.46879	0.218889	137	1	Sod1	positive regulation of protein kinase activity	0.241994
GO:0071363	4.3381	0.224574	141	1	Prkcb	cellular response to growth factor stimulus	0.246907
GO:0070848	4.24483	0.228814	144	1	Prkcb	response to growth factor stimulus	0.250186
GO:0048872	4.2146	0.230222	145	1	Sod1	homeostasis of number of cells	0.250351
GO:0008610	4.18479	0.231628	146	1	Sod1	lipid biosynthetic process	0.250511
GO:0048562	4.15539	0.233032	147	1	Sod1	embryonic organ morphogenesis	0.250667
GO:0033674	4.09778	0.235833	149	1	Sod1	positive regulation of kinase activity	0.252316
GO:0050778	4.01425	0.240017	152	1	Prkcb	positive regulation of immune response	0.25542
GO:0007186	3.96039	0.242795	154	1	Cish	G-protein coupled receptor signaling pathway	0.25585
GO:0007283	3.93399	0.244181	155	1	Sod1	spermatogenesis	0.25585
GO:0001525	3.90793	0.245564	156	1	Prkcb	angiogenesis	0.25585
GO:0048232	3.90793	0.245564	156	1	Sod1	male gamete generation	0.25585
GO:0051347	3.71027	0.256549	164	1	Sod1	positive regulation of transferase activity	0.265902
GO:0006396	3.61904	0.261987	168	1	Ebna1bp2	RNA processing	0.268739
GO:0016570	3.61904	0.261987	168	1	Prkcb	histone modification	0.268739
GO:0005975	3.40854	0.275426	178	1	Krtcap2	carbohydrate metabolic process	0.281075
GO:0061024	3.2747	0.284701	185	1	Sod1	membrane organization	0.288921
GO:0001817	3.25641	0.286018	186	1	Sod1	regulation of cytokine production	0.288921
GO:0007169	3.03542	0.302933	199	1	Prkcb	transmembrane receptor protein tyrosine kinase signaling pathway	0.304219
GO:0001934	3.01962	0.304219	200	1	Sod1	positive regulation of protein phosphorylation	0.304219

## Sheet: cl 3 transdiff hallmark
	odds.ratio	p.value	n.categoy	n.category.and.component	genes	FDR
HALLMARK_MYC_TARGETS_V1	5.25232	0.0128803	198	4	Hdgf,Rps5,Eef1b2,Rps3	0.192989
HALLMARK_REACTIVE_OXIGEN_SPECIES_PATHWAY	10.9786	0.0183799	44	2	Sod1,Msra	0.192989
HALLMARK_XENOBIOTIC_METABOLISM	4.93084	0.0325336	149	3	Pmm1,Aldh3a1,Ptgr1	0.227735
HALLMARK_ADIPOGENESIS	4.03112	0.0524676	180	3	Tkt,Sod1,Ak2	0.275455
HALLMARK_UNFOLDED_PROTEIN_RESPONSE	4.23575	0.0952829	109	2	Lsm4,Exosc5	0.400188
HALLMARK_ALLOGRAFT_REJECTION	3.06956	0.158003	148	2	Prkcb,Rps9	0.553012
HALLMARK_MYC_TARGETS_V2	3.7824	0.246186	58	1	Exosc5	0.618752
HALLMARK_BILE_ACID_METABOLISM	2.61073	0.333615	83	1	Sod1	0.618752
HALLMARK_PEROXISOME	2.61073	0.333615	83	1	Sod1	0.618752
HALLMARK_PROTEIN_SECRETION	2.34665	0.362683	92	1	Sod1	0.618752
HALLMARK_PI3K_AKT_MTOR_SIGNALING	2.19776	0.381394	98	1	Prkcb	0.618752
HALLMARK_FATTY_ACID_METABOLISM	1.65057	0.470109	129	1	Aldh3a1	0.618752
HALLMARK_APOPTOSIS	1.51505	0.4986	140	1	Sod1	0.618752
HALLMARK_ESTROGEN_RESPONSE_LATE	1.34322	0.539812	157	1	Cish	0.618752
HALLMARK_HEME_METABOLISM	1.29958	0.551313	162	1	Hdgf	0.618752
HALLMARK_IL2_STAT5_SIGNALING	1.24285	0.56696	169	1	Cish	0.618752
HALLMARK_ESTROGEN_RESPONSE_EARLY	1.23512	0.569153	170	1	Cish	0.618752
HALLMARK_GLYCOLYSIS	1.21995	0.573508	172	1	Sod1	0.618752
HALLMARK_P53_PATHWAY	1.13588	0.598778	184	1	Pmm1	0.618752
HALLMARK_MTORC1_SIGNALING	1.11026	0.606883	188	1	Cacybp	0.618752
HALLMARK_E2F_TARGETS	1.07378	0.618752	194	1	Ak2	0.618752

## Sheet: cl 4 transdiff GO
	odds.ratio	p.value	n.categoy	n.category.and.component	genes	description	FDR
GO:0009069	69.2291	0.000646192	10	2	Gclm,Phgdh	serine family amino acid metabolic process	0.164133
GO:0000226	7.30775	0.0037802	169	4	Tubb5,Tuba1b,Ranbp1,Stmn1	microtubule cytoskeleton organization	0.256943
GO:0051262	21.3587	0.00520132	28	2	Ryr3,Rrm2	protein tetramerization	0.256943
GO:0006457	19.8355	0.00595739	30	2	Tubb5,Tuba1b	protein folding	0.256943
GO:0032649	17.3457	0.00761065	34	2	Hspd1,Pglyrp3	regulation of interferon-gamma production	0.256943
GO:0035150	14.9958	0.0099345	39	2	Manf,Gclm	regulation of tube size	0.256943
GO:0050880	14.9958	0.0099345	39	2	Manf,Gclm	regulation of blood vessel size	0.256943
GO:0032609	13.53	0.0119926	43	2	Hspd1,Pglyrp3	interferon-gamma production	0.256943
GO:0007051	12.5973	0.0136487	46	2	Tubb5,Ranbp1	spindle organization	0.256943
GO:0070507	12.0463	0.0148051	48	2	Ranbp1,Stmn1	regulation of microtubule cytoskeleton organization	0.256943
GO:0032886	9.21504	0.0240146	62	2	Ranbp1,Stmn1	regulation of microtubule-based process	0.256943
GO:0001817	4.66841	0.034599	186	3	Hspd1,Mif,Pglyrp3	regulation of cytokine production	0.256943
GO:0032722	29.441	0.0385005	10	1	Mif	positive regulation of chemokine production	0.256943
GO:0033198	29.441	0.0385005	10	1	Ryr3	response to ATP	0.256943
GO:0045777	29.441	0.0385005	10	1	Manf	positive regulation of blood pressure	0.256943
GO:0060117	29.441	0.0385005	10	1	Pcdh15	auditory receptor cell development	0.256943
GO:0051259	6.71934	0.0420421	84	2	Ryr3,Rrm2	protein oligomerization	0.256943
GO:0006536	26.5114	0.0422718	11	1	Gclm	glutamate metabolic process	0.256943
GO:0015909	26.5114	0.0422718	11	1	Mif	long-chain fatty acid transport	0.256943
GO:0031113	26.5114	0.0422718	11	1	Stmn1	regulation of microtubule polymerization	0.256943
GO:0031503	26.5114	0.0422718	11	1	Ran	protein complex localization	0.256943
GO:0032508	26.5114	0.0422718	11	1	Mcm7	DNA duplex unwinding	0.256943
GO:0032689	26.5114	0.0422718	11	1	Pglyrp3	negative regulation of interferon-gamma production	0.256943
GO:0043043	26.5114	0.0422718	11	1	Gclm	peptide biosynthetic process	0.256943
GO:0043516	26.5114	0.0422718	11	1	Mif	regulation of DNA damage response, signal transduction by p53 class mediator	0.256943
GO:0050910	26.5114	0.0422718	11	1	Pcdh15	detection of mechanical stimulus involved in sensory perception of sound	0.256943
GO:0060004	26.5114	0.0422718	11	1	Pcdh15	reflex	0.256943
GO:0060122	26.5114	0.0422718	11	1	Pcdh15	inner ear receptor stereocilium organization	0.256943
GO:0001819	6.47888	0.0448016	87	2	Hspd1,Mif	positive regulation of cytokine production	0.256943
GO:0006301	24.1076	0.0460289	12	1	Pcna	postreplication repair	0.256943
GO:0051291	24.1076	0.0460289	12	1	Rrm2	protein heterooligomerization	0.256943
GO:0051351	24.1076	0.0460289	12	1	Gclm	positive regulation of ligase activity	0.256943
GO:0071277	24.1076	0.0460289	12	1	Ryr3	cellular response to calcium ion	0.256943
GO:0031111	22.0907	0.049772	13	1	Stmn1	negative regulation of microtubule polymerization or depolymerization	0.256943
GO:0032272	22.0907	0.049772	13	1	Stmn1	negative regulation of protein polymerization	0.256943
GO:0032370	22.0907	0.049772	13	1	Mif	positive regulation of lipid transport	0.256943
GO:0032392	22.0907	0.049772	13	1	Mcm7	DNA geometric change	0.256943
GO:0046605	22.0907	0.049772	13	1	Ranbp1	regulation of centrosome cycle	0.256943
GO:0006790	5.91352	0.0524807	95	2	Gclm,Phgdh	sulfur compound metabolic process	0.256943
GO:0001964	20.3892	0.053501	14	1	Pcdh15	startle response	0.256943
GO:0002902	20.3892	0.053501	14	1	Mif	regulation of B cell apoptotic process	0.256943
GO:0009262	20.3892	0.053501	14	1	Rrm2	deoxyribonucleotide metabolic process	0.256943
GO:0006284	18.9371	0.0572161	15	1	Pcna	base-excision repair	0.256943
GO:0007143	18.9371	0.0572161	15	1	Ppp1ca	female meiosis	0.256943
GO:0044070	18.9371	0.0572161	15	1	Mif	regulation of anion transport	0.256943
GO:0051289	18.9371	0.0572161	15	1	Ryr3	protein homotetramerization	0.256943
GO:0033032	17.6723	0.0609172	16	1	Mif	regulation of myeloid cell apoptotic process	0.256943
GO:0042310	17.6723	0.0609172	16	1	Manf	vasoconstriction	0.256943
GO:0050974	17.6723	0.0609172	16	1	Pcdh15	detection of mechanical stimulus involved in sensory perception	0.256943
GO:0051881	17.6723	0.0609172	16	1	Gclm	regulation of mitochondrial membrane potential	0.256943
GO:0000096	16.5623	0.0646045	17	1	Gclm	sulfur amino acid metabolic process	0.256943
GO:0001783	16.5623	0.0646045	17	1	Mif	B cell apoptotic process	0.256943
GO:0006334	16.5623	0.0646045	17	1	Asf1b	nucleosome assembly	0.256943
GO:0032481	16.5623	0.0646045	17	1	Hspd1	positive regulation of type I interferon production	0.256943
GO:0032814	16.5623	0.0646045	17	1	Pglyrp3	regulation of natural killer cell activation	0.256943
GO:0033028	16.5623	0.0646045	17	1	Mif	myeloid cell apoptotic process	0.256943
GO:0033138	16.5623	0.0646045	17	1	Mif	positive regulation of peptidyl-serine phosphorylation	0.256943
GO:0044117	16.5623	0.0646045	17	1	Pglyrp3	growth of symbiont in host	0.256943
GO:0046785	16.5623	0.0646045	17	1	Stmn1	microtubule polymerization	0.256943
GO:0001779	15.5935	0.068278	18	1	Pglyrp3	natural killer cell differentiation	0.256943
GO:0031333	15.5935	0.068278	18	1	Stmn1	negative regulation of protein complex assembly	0.256943
GO:0048146	15.5935	0.068278	18	1	Mif	positive regulation of fibroblast proliferation	0.256943
GO:0015908	14.7275	0.0719376	19	1	Mif	fatty acid transport	0.256943
GO:0050982	14.7275	0.0719376	19	1	Pcdh15	detection of mechanical stimulus	0.256943
GO:0060119	14.7275	0.0719376	19	1	Pcdh15	inner ear receptor cell development	0.256943
GO:0006520	4.89401	0.0724235	114	2	Gclm,Phgdh	cellular amino acid metabolic process	0.256943
GO:0030330	13.9535	0.0755836	20	1	Mif	DNA damage response, signal transduction by p53 class mediator	0.256943
GO:0032729	13.9535	0.0755836	20	1	Hspd1	positive regulation of interferon-gamma production	0.256943
GO:0042491	13.9535	0.0755836	20	1	Pcdh15	auditory receptor cell differentiation	0.256943
GO:0071897	13.9535	0.0755836	20	1	Pcna	DNA biosynthetic process	0.256943
GO:0001782	13.2466	0.0792159	21	1	Mif	B cell homeostasis	0.256943
GO:0002367	13.2466	0.0792159	21	1	Mif	cytokine production involved in immune response	0.256943
GO:0032642	13.2466	0.0792159	21	1	Mif	regulation of chemokine production	0.256943
GO:0043279	13.2466	0.0792159	21	1	Ryr3	response to alkaloid	0.256943
GO:2000107	13.2466	0.0792159	21	1	Mif	negative regulation of leukocyte apoptotic process	0.256943
GO:0007098	12.6177	0.0828345	22	1	Ranbp1	centrosome cycle	0.256943
GO:0008015	4.48493	0.083776	124	2	Manf,Gclm	blood circulation	0.256943
GO:0051493	4.4112	0.0861103	126	2	Ranbp1,Stmn1	regulation of cytoskeleton organization	0.256943
GO:0005977	12.045	0.0864396	23	1	Ppp1ca	glycogen metabolic process	0.256943
GO:0007601	12.045	0.0864396	23	1	Pcdh15	visual perception	0.256943
GO:0031663	12.045	0.0864396	23	1	Mif	lipopolysaccharide-mediated signaling pathway	0.256943
GO:0035315	12.045	0.0864396	23	1	Pcdh15	hair cell differentiation	0.256943
GO:0006112	11.5203	0.0900312	24	1	Ppp1ca	energy reserve metabolic process	0.256943
GO:0006749	11.5203	0.0900312	24	1	Gclm	glutathione metabolic process	0.256943
GO:0031110	11.5203	0.0900312	24	1	Stmn1	regulation of microtubule polymerization or depolymerization	0.256943
GO:0042770	11.5203	0.0900312	24	1	Mif	signal transduction in response to DNA damage	0.256943
GO:0043648	11.5203	0.0900312	24	1	Gclm	dicarboxylic acid metabolic process	0.256943
GO:0050953	11.5203	0.0900312	24	1	Pcdh15	sensory perception of light stimulus	0.256943
GO:0070588	11.5203	0.0900312	24	1	Ryr3	calcium ion transmembrane transport	0.256943
GO:0033135	11.0391	0.0936093	25	1	Mif	regulation of peptidyl-serine phosphorylation	0.258443
GO:0051225	11.0391	0.0936093	25	1	Tubb5	spindle assembly	0.258443
GO:0051592	11.0391	0.0936093	25	1	Ryr3	response to calcium ion	0.258443
GO:0071241	10.1861	0.100725	27	1	Ryr3	cellular response to inorganic substance	0.273019
GO:0006941	9.80895	0.104263	28	1	Ryr3	striated muscle contraction	0.273019
GO:0008652	9.80895	0.104263	28	1	Gclm	cellular amino acid biosynthetic process	0.273019
GO:0031497	9.80895	0.104263	28	1	Asf1b	chromatin assembly	0.273019
GO:0070374	9.80895	0.104263	28	1	Mif	positive regulation of ERK1 and ERK2 cascade	0.273019
GO:0007088	9.45539	0.107788	29	1	Ranbp1	regulation of mitosis	0.273781
GO:0007628	9.45539	0.107788	29	1	Pcdh15	adult walking behavior	0.273781
GO:0009612	9.45539	0.107788	29	1	Pcdh15	response to mechanical stimulus	0.273781
GO:0030101	8.82509	0.114797	31	1	Pglyrp3	natural killer cell activation	0.283092
GO:0031109	8.82509	0.114797	31	1	Stmn1	microtubule polymerization or depolymerization	0.283092
GO:0065004	8.82509	0.114797	31	1	Asf1b	protein-DNA complex assembly	0.283092
GO:0051494	8.53914	0.118282	32	1	Stmn1	negative regulation of cytoskeleton organization	0.288882
GO:0060113	8.27084	0.121754	33	1	Pcdh15	inner ear receptor cell differentiation	0.294529
GO:0003073	8.01946	0.125213	34	1	Manf	regulation of systemic arterial blood pressure	0.296915
GO:0050885	8.01946	0.125213	34	1	Pcdh15	neuromuscular process controlling balance	0.296915
GO:0008637	7.78256	0.128659	35	1	Slc25a4	apoptotic mitochondrial changes	0.296915
GO:0021782	7.78256	0.128659	35	1	Phgdh	glial cell development	0.296915
GO:0050801	3.41874	0.129879	161	2	Ryr3,Gclm	ion homeostasis	0.296915
GO:0006333	7.5593	0.132092	36	1	Asf1b	chromatin assembly or disassembly	0.296915
GO:0021510	7.5593	0.132092	36	1	Phgdh	spinal cord development	0.296915
GO:0051899	7.5593	0.132092	36	1	Gclm	membrane depolarization	0.296915
GO:0051297	7.34858	0.135512	37	1	Ranbp1	centrosome organization	0.30193
GO:0006261	7.14939	0.138919	38	1	Mcm7	DNA-dependent DNA replication	0.304185
GO:0042490	7.14939	0.138919	38	1	Pcdh15	mechanoreceptor differentiation	0.304185
GO:0031023	6.95785	0.142314	39	1	Ranbp1	microtubule organizing center organization	0.308954
GO:0007569	6.77918	0.145695	40	1	Mif	cell aging	0.312911
GO:0043270	6.60919	0.149064	41	1	Mif	positive regulation of ion transport	0.312911
GO:0050731	6.60919	0.149064	41	1	Mif	positive regulation of peptidyl-tyrosine phosphorylation	0.312911
GO:2000021	6.60919	0.149064	41	1	Gclm	regulation of ion homeostasis	0.312911
GO:0002260	6.44697	0.15242	42	1	Mif	lymphocyte homeostasis	0.315444
GO:0005975	3.07902	0.152755	178	2	Cs,Ppp1ca	carbohydrate metabolic process	0.315444
GO:0006323	6.14518	0.159094	44	1	Asf1b	DNA packaging	0.32328
GO:0090068	6.14518	0.159094	44	1	Ranbp1	positive regulation of cell cycle process	0.32328
GO:0001818	6.00458	0.162413	45	1	Pglyrp3	negative regulation of cytokine production	0.324826
GO:0006518	6.00458	0.162413	45	1	Gclm	peptide metabolic process	0.324826
GO:0070372	5.74171	0.169012	47	1	Mif	regulation of ERK1 and ERK2 cascade	0.335383
GO:0007286	5.38833	0.178818	50	1	Pebp1	spermatid development	0.346716
GO:0008217	5.38833	0.178818	50	1	Manf	regulation of blood pressure	0.346716
GO:0071222	5.38833	0.178818	50	1	Mif	cellular response to lipopolysaccharide	0.346716
GO:0042384	5.27973	0.182062	51	1	Pcdh15	cilium assembly	0.350332
GO:0042472	5.07494	0.188514	53	1	Pcdh15	inner ear morphogenesis	0.352878
GO:0048515	5.07494	0.188514	53	1	Pebp1	spermatid differentiation	0.352878
GO:0001776	4.97733	0.191721	54	1	Mif	leukocyte homeostasis	0.352878
GO:0006869	4.97733	0.191721	54	1	Mif	lipid transport	0.352878
GO:0009165	4.97733	0.191721	54	1	Rrm2	nucleotide biosynthetic process	0.352878
GO:0070371	4.97733	0.191721	54	1	Mif	ERK1 and ERK2 cascade	0.352878
GO:0071219	4.88459	0.194916	55	1	Mif	cellular response to molecule of bacterial origin	0.353233
GO:0042493	4.7951	0.1981	56	1	Gclm	response to drug	0.353233
GO:0051260	4.7951	0.1981	56	1	Ryr3	protein homooligomerization	0.353233
GO:0009913	4.70874	0.201271	57	1	Pcdh15	epidermal cell differentiation	0.353233
GO:0007568	4.62491	0.20443	58	1	Mif	aging	0.353233
GO:0007605	4.62491	0.20443	58	1	Pcdh15	sensory perception of sound	0.353233
GO:0008344	4.62491	0.20443	58	1	Pcdh15	adult locomotory behavior	0.353233
GO:0018105	4.62491	0.20443	58	1	Mif	peptidyl-serine phosphorylation	0.353233
GO:0050905	4.62491	0.20443	58	1	Pcdh15	neuromuscular process	0.353233
GO:0051302	4.54525	0.207578	59	1	Ranbp1	regulation of cell division	0.356248
GO:0042471	4.46725	0.210713	60	1	Pcdh15	ear morphogenesis	0.356807
GO:0071407	4.46725	0.210713	60	1	Ryr3	cellular response to organic cyclic compound	0.356807
GO:0048469	4.3192	0.216949	62	1	Pebp1	cell maturation	0.360163
GO:0051250	4.3192	0.216949	62	1	Pglyrp3	negative regulation of lymphocyte activation	0.360163
GO:0051606	4.3192	0.216949	62	1	Pcdh15	detection of stimulus	0.360163
GO:0050954	4.24875	0.220049	63	1	Pcdh15	sensory perception of mechanical stimulus	0.362937
GO:0002699	4.05064	0.229279	66	1	Mif	positive regulation of immune effector process	0.375721
GO:0051258	3.9886	0.232332	67	1	Stmn1	protein polymerization	0.378284
GO:0006936	3.9284	0.235374	68	1	Ryr3	muscle contraction	0.380796
GO:0050730	3.86999	0.238404	69	1	Mif	regulation of peptidyl-tyrosine phosphorylation	0.383258
GO:0006417	3.70473	0.247427	72	1	Ppp1ca	regulation of translation	0.391584
GO:0002064	3.60141	0.253385	74	1	Pcdh15	epithelial cell development	0.391584
GO:0043406	3.60141	0.253385	74	1	Mif	positive regulation of MAP kinase activity	0.391584
GO:0006091	3.55227	0.256348	75	1	Ppp1ca	generation of precursor metabolites and energy	0.391584
GO:0010001	3.55227	0.256348	75	1	Phgdh	glial cell differentiation	0.391584
GO:0043254	3.50446	0.259299	76	1	Stmn1	regulation of protein complex assembly	0.391584
GO:0006470	3.45781	0.262238	77	1	Ppp1ca	protein dephosphorylation	0.391584
GO:0045619	3.45781	0.262238	77	1	Pglyrp3	regulation of lymphocyte differentiation	0.391584
GO:0050870	3.45781	0.262238	77	1	Hspd1	positive regulation of T cell activation	0.391584
GO:0051047	3.45781	0.262238	77	1	Mif	positive regulation of secretion	0.391584
GO:0003012	3.41231	0.265167	78	1	Ryr3	muscle system process	0.391584
GO:0007067	3.41231	0.265167	78	1	Ranbp1	mitosis	0.391584
GO:0030534	3.41231	0.265167	78	1	Pcdh15	adult behavior	0.391584
GO:0060271	3.41231	0.265167	78	1	Pcdh15	cilium morphogenesis	0.391584
GO:0071396	3.32475	0.270991	80	1	Mif	cellular response to lipid	0.397871
GO:0006874	3.24152	0.276771	82	1	Ryr3	cellular calcium ion homeostasis	0.404022
GO:0007126	3.20142	0.279645	83	1	Ppp1ca	meiosis	0.405884
GO:0002366	3.08679	0.2882	86	1	Pglyrp3	leukocyte activation involved in immune response	0.408955
GO:0006260	3.08679	0.2882	86	1	Mcm7	DNA replication	0.408955
GO:0040029	3.08679	0.2882	86	1	Smchd1	regulation of gene expression, epigenetic	0.408955
GO:0055074	3.08679	0.2882	86	1	Ryr3	calcium ion homeostasis	0.408955
GO:0010035	3.05037	0.29103	87	1	Ryr3	response to inorganic substance	0.410098
GO:0006979	3.01478	0.29385	88	1	Gclm	response to oxidative stress	0.410098
GO:0051321	3.01478	0.29385	88	1	Ppp1ca	meiotic cell cycle	0.410098
GO:0006606	2.98	0.296659	89	1	Ran	protein import into nucleus	0.411756
GO:0032496	2.91275	0.302244	91	1	Mif	response to lipopolysaccharide	0.414973
GO:0051170	2.91275	0.302244	91	1	Ran	nuclear import	0.414973
GO:0071902	2.88024	0.305021	92	1	Mif	positive regulation of protein serine/threonine kinase activity	0.416534
GO:0051272	2.81731	0.310543	94	1	Stmn1	positive regulation of cellular component movement	0.418818
GO:0010638	2.78685	0.313289	95	1	Ranbp1	positive regulation of organelle organization	0.418818
GO:0015711	2.78685	0.313289	95	1	Mif	organic anion transport	0.418818
GO:0017038	2.78685	0.313289	95	1	Ran	protein import	0.418818
GO:0007346	2.75693	0.316024	96	1	Ranbp1	regulation of mitotic cell cycle	0.420262
GO:0048839	2.72775	0.318748	97	1	Pcdh15	inner ear development	0.421677
GO:0034220	2.67116	0.324166	99	1	Ryr3	ion transmembrane transport	0.424424
GO:0035264	2.67116	0.324166	99	1	Pcdh15	multicellular organism growth	0.424424
GO:0007281	2.61683	0.329543	101	1	Pebp1	germ cell development	0.429139
GO:0006816	2.59041	0.332216	102	1	Ryr3	calcium ion transport	0.429139
GO:0007015	2.56466	0.334879	103	1	Pcdh15	actin filament organization	0.429139
GO:0030324	2.53931	0.337532	104	1	Ppp1ca	lung development	0.429139
GO:0048754	2.53931	0.337532	104	1	Ppp1ca	branching morphogenesis of a tube	0.429139
GO:0002237	2.51445	0.340174	105	1	Mif	response to molecule of bacterial origin	0.429139
GO:0007626	2.51445	0.340174	105	1	Pcdh15	locomotory behavior	0.429139
GO:0018108	2.46626	0.34543	107	1	Mif	peptidyl-tyrosine phosphorylation	0.429139
GO:0030323	2.46626	0.34543	107	1	Ppp1ca	respiratory tube development	0.429139
GO:0051251	2.46626	0.34543	107	1	Hspd1	positive regulation of lymphocyte activation	0.429139
GO:0021915	2.44249	0.348042	108	1	Phgdh	neural tube development	0.429139
GO:0071417	2.44249	0.348042	108	1	Ryr3	cellular response to organic nitrogen	0.429139
GO:0043583	2.4195	0.350645	109	1	Pcdh15	ear development	0.43026
GO:0006875	2.39691	0.353237	110	1	Ryr3	cellular metal ion homeostasis	0.430373
GO:0006820	2.37472	0.35582	111	1	Mif	anion transport	0.430373
GO:0055114	2.37472	0.35582	111	1	Ppp1ca	oxidation-reduction process	0.430373
GO:0002683	2.35292	0.358393	112	1	Pglyrp3	negative regulation of immune system process	0.431431
GO:0010564	2.33151	0.360956	113	1	Ranbp1	regulation of cell cycle process	0.432467
GO:0008544	2.23001	0.373626	118	1	Pcdh15	epidermis development	0.443463
GO:0043405	2.23001	0.373626	118	1	Mif	regulation of MAP kinase activity	0.443463
GO:0006873	2.19167	0.378627	120	1	Ryr3	cellular ion homeostasis	0.445237
GO:0060541	2.19167	0.378627	120	1	Ppp1ca	respiratory system development	0.445237
GO:0030031	2.173	0.381113	121	1	Pcdh15	cell projection assembly	0.446095
GO:0006412	2.11883	0.388514	124	1	Ppp1ca	translation	0.450107
GO:0050863	2.11883	0.388514	124	1	Hspd1	regulation of T cell activation	0.450107
GO:0043623	2.10134	0.390962	125	1	Stmn1	cellular protein complex assembly	0.450107
GO:0014070	2.08417	0.393401	126	1	Ryr3	response to organic cyclic compound	0.450107
GO:0055085	2.08417	0.393401	126	1	Ryr3	transmembrane transport	0.450107
GO:0061138	2.03416	0.400661	129	1	Ppp1ca	morphogenesis of a branching epithelium	0.456359
GO:0007005	1.97117	0.410213	133	1	Slc25a4	mitochondrion organization	0.461036
GO:0042391	1.97117	0.410213	133	1	Gclm	regulation of membrane potential	0.461036
GO:0043410	1.97117	0.410213	133	1	Mif	positive regulation of MAPK cascade	0.461036
GO:0001763	1.956	0.412578	134	1	Ppp1ca	morphogenesis of a branching structure	0.4614
GO:0032787	1.92633	0.417282	136	1	Phgdh	monocarboxylic acid metabolic process	0.4614
GO:0007600	1.91183	0.41962	137	1	Pcdh15	sensory perception	0.4614
GO:0043588	1.91183	0.41962	137	1	Pcdh15	skin development	0.4614
GO:0045860	1.91183	0.41962	137	1	Mif	positive regulation of protein kinase activity	0.4614
GO:0006913	1.85591	0.428883	141	1	Ran	nucleocytoplasmic transport	0.469553
GO:0016311	1.81585	0.435737	144	1	Ppp1ca	dephosphorylation	0.474255
GO:0048872	1.80294	0.438005	145	1	Mif	homeostasis of number of cells	0.474255
GO:0055082	1.79021	0.440263	146	1	Ryr3	cellular chemical homeostasis	0.474255
GO:0006605	1.77764	0.442513	147	1	Ran	protein targeting	0.474255
GO:0048562	1.77764	0.442513	147	1	Pcdh15	embryonic organ morphogenesis	0.474255
GO:0033674	1.75298	0.446988	149	1	Mif	positive regulation of kinase activity	0.477037
GO:0009617	1.70561	0.455833	153	1	Mif	response to bacterium	0.483025
GO:0010608	1.69415	0.458023	154	1	Ppp1ca	posttranscriptional regulation of gene expression	0.483025
GO:0007283	1.68285	0.460205	155	1	Pebp1	spermatogenesis	0.483025
GO:0051046	1.68285	0.460205	155	1	Mif	regulation of secretion	0.483025
GO:0048232	1.67168	0.462379	156	1	Pebp1	male gamete generation	0.483309
GO:0033993	1.66066	0.464544	157	1	Mif	response to lipid	0.483582
GO:0006281	1.62844	0.470989	160	1	Pcna	DNA repair	0.488291
GO:0051347	1.58731	0.479468	164	1	Mif	positive regulation of transferase activity	0.49506
GO:0033365	1.57734	0.481567	165	1	Ran	protein localization to organelle	0.495215
GO:0019725	1.53866	0.489884	169	1	Ryr3	cellular homeostasis	0.501736
GO:0032269	1.52	0.493994	171	1	Mif	negative regulation of cellular protein metabolic process	0.503914
GO:0030098	1.47522	0.504132	176	1	Pglyrp3	lymphocyte differentiation	0.512198
GO:0007409	1.40867	0.519951	184	1	Stmn1	axonogenesis	0.526166
GO:0051050	1.34771	0.535288	192	1	Mif	positive regulation of transport	0.539536
GO:0051270	1.33325	0.539048	194	1	Stmn1	regulation of cellular component movement	0.541179
GO:0001934	1.29163	0.550156	200	1	Mif	positive regulation of protein phosphorylation	0.550156

## Sheet: cl 4 transdiff hallmark
	odds.ratio	p.value	n.categoy	n.category.and.component	genes	FDR
HALLMARK_E2F_TARGETS	12.4305	6.34987e-08	194	11	Mcm7,Pcna,Mcm5,Asf1b,Cdk4,Rrm2,Ranbp1,Pa2g4,Stmn1,Ran,Dut	7.07129e-07
HALLMARK_MYC_TARGETS_V1	12.154	7.85699e-08	198	11	Hspe1,Mcm7,Pcna,Mcm5,Cdk4,Ranbp1,Pa2g4,Hspd1,Ran,Set,Dut	7.07129e-07
HALLMARK_MYC_TARGETS_V2	14.7358	6.18956e-05	58	5	Hspe1,Mcm5,Cdk4,Pa2g4,Hspd1	0.000371373
HALLMARK_MTORC1_SIGNALING	4.11529	0.0126328	188	5	Hspe1,Rrm2,Shmt2,Hspd1,Phgdh	0.0568476
HALLMARK_SPERMATOGENESIS	3.17301	0.144848	88	2	Grm8,Pebp1	0.416578
HALLMARK_P53_PATHWAY	2.29069	0.164094	184	3	Rps27l,Pcna,Hist3h2a	0.416578
HALLMARK_PI3K_AKT_MTOR_SIGNALING	2.83442	0.171839	98	2	Ppp1ca,Cdk4	0.416578
HALLMARK_G2M_CHECKPOINT	2.15238	0.185146	195	3	Mcm5,Cdk4,Stmn1	0.416578
HALLMARK_DNA_REPAIR	2.04003	0.273963	134	2	Pcna,Dut	0.51921
HALLMARK_REACTIVE_OXIGEN_SPECIES_PATHWAY	3.08942	0.28845	44	1	Gclm	0.51921
HALLMARK_TGF_BETA_SIGNALING	2.6518	0.326217	51	1	Ppp1ca	0.53381
HALLMARK_GLYCOLYSIS	1.56632	0.38236	172	2	Stmn1,Mif	0.573539
HALLMARK_BILE_ACID_METABOLISM	1.60243	0.47564	83	1	Gclm	0.599821
HALLMARK_PEROXISOME	1.60243	0.47564	83	1	Slc25a4	0.599821
HALLMARK_ANDROGEN_RESPONSE	1.49059	0.49985	89	1	Pa2g4	0.599821
HALLMARK_OXIDATIVE_PHOSPHORYLATION	1.40089	0.65551	191	2	Slc25a4,Cs	0.737449
HALLMARK_FATTY_ACID_METABOLISM	1.01292	1	129	1	Mif	1
HALLMARK_UV_RESPONSE_UP	1.0212	1	128	1	Slc25a4	1

## Sheet: cl 6 transdiff GO
	odds.ratio	p.value	n.categoy	n.category.and.component	genes	description	FDR
GO:0001836	166.723	0.000173497	24	2	Fam162a,Sod2	release of cytochrome c from mitochondria	0.0129154
GO:0003073	114.712	0.000351395	34	2	Sod2,Cpa3	regulation of systemic arterial blood pressure	0.0129154
GO:0008637	111.379	0.000372559	35	2	Fam162a,Sod2	apoptotic mitochondrial changes	0.0129154
GO:0008217	76.6939	0.000762932	50	2	Sod2,Cpa3	regulation of blood pressure	0.0198362
GO:0055114	33.5515	0.00371994	111	2	Sod2,Acadl	oxidation-reduction process	0.055073
GO:0008015	29.9095	0.00462504	124	2	Sod2,Cpa3	blood circulation	0.055073
GO:0007005	27.8373	0.00530648	133	2	Fam162a,Sod2	mitochondrion organization	0.055073
GO:0003081	137.581	0.00975343	11	1	Cpa3	regulation of systemic arterial blood pressure by renin-angiotensin	0.055073
GO:0010822	137.581	0.00975343	11	1	Fam162a	positive regulation of mitochondrion organization	0.055073
GO:0019430	137.581	0.00975343	11	1	Sod2	removal of superoxide radicals	0.055073
GO:0042304	137.581	0.00975343	11	1	Acadl	regulation of fatty acid biosynthetic process	0.055073
GO:0042554	137.581	0.00975343	11	1	Sod2	superoxide anion generation	0.055073
GO:0045429	137.581	0.00975343	11	1	Sod2	positive regulation of nitric oxide biosynthetic process	0.055073
GO:0000303	125.231	0.0106363	12	1	Sod2	response to superoxide	0.055073
GO:0000305	114.85	0.0115186	13	1	Sod2	response to oxygen radical	0.055073
GO:0048147	106.072	0.0124002	14	1	Sod2	negative regulation of fibroblast proliferation	0.055073
GO:0006635	98.782	0.0132812	15	1	Acadl	fatty acid beta-oxidation	0.055073
GO:0048678	98.782	0.0132812	15	1	Sod2	response to axon injury	0.055073
GO:0051055	98.782	0.0132812	15	1	Acadl	negative regulation of lipid biosynthetic process	0.055073
GO:0009593	92.1675	0.0141616	16	1	Sod2	detection of chemical stimulus	0.055073
GO:0022904	92.1675	0.0141616	16	1	Sod2	respiratory electron transport chain	0.055073
GO:0051881	92.1675	0.0141616	16	1	Sod2	regulation of mitochondrial membrane potential	0.055073
GO:0071453	92.1675	0.0141616	16	1	Fam162a	cellular response to oxygen levels	0.055073
GO:0071456	92.1675	0.0141616	16	1	Fam162a	cellular response to hypoxia	0.055073
GO:0001659	86.5584	0.0150413	17	1	Acadl	temperature homeostasis	0.055073
GO:0019217	86.5584	0.0150413	17	1	Acadl	regulation of fatty acid metabolic process	0.055073
GO:0045428	86.5584	0.0150413	17	1	Sod2	regulation of nitric oxide biosynthetic process	0.055073
GO:0042311	76.8539	0.0167989	19	1	Sod2	vasodilation	0.055073
GO:0045833	72.9418	0.0176768	20	1	Acadl	negative regulation of lipid metabolic process	0.055073
GO:0051568	72.9418	0.0176768	20	1	Dpy30	histone H3-K4 methylation	0.055073
GO:0009062	69.2669	0.018554	21	1	Acadl	fatty acid catabolic process	0.055073
GO:0042542	69.2669	0.018554	21	1	Sod2	response to hydrogen peroxide	0.055073
GO:0010332	65.9901	0.0194306	22	1	Sod2	response to gamma radiation	0.055073
GO:0019395	65.9901	0.0194306	22	1	Acadl	fatty acid oxidation	0.055073
GO:0045599	65.9901	0.0194306	22	1	Sod2	negative regulation of fat cell differentiation	0.055073
GO:0055072	65.9901	0.0194306	22	1	Sod2	iron ion homeostasis	0.055073
GO:0006801	63.0098	0.0203066	23	1	Sod2	superoxide metabolic process	0.055073
GO:0006749	60.2868	0.0211819	24	1	Sod2	glutathione metabolic process	0.055073
GO:0006809	60.2868	0.0211819	24	1	Sod2	nitric oxide biosynthetic process	0.055073
GO:0034614	60.2868	0.0211819	24	1	Sod2	cellular response to reactive oxygen species	0.055073
GO:0019218	57.7363	0.0220567	25	1	Acadl	regulation of steroid metabolic process	0.0559486
GO:0048066	47.8607	0.0264209	30	1	Sod2	developmental pigmentation	0.0649234
GO:0006919	42.0679	0.0299011	34	1	Fam162a	activation of cysteine-type endopeptidase activity involved in apoptotic process	0.0649234
GO:0045333	42.0679	0.0299011	34	1	Sod2	cellular respiration	0.0649234
GO:0046890	42.0679	0.0299011	34	1	Acadl	regulation of lipid biosynthetic process	0.0649234
GO:0006633	38.5106	0.0325047	37	1	Acadl	fatty acid biosynthetic process	0.0649234
GO:0008203	37.5085	0.0333713	38	1	Acadl	cholesterol metabolic process	0.0649234
GO:0034968	37.5085	0.0333713	38	1	Dpy30	histone lysine methylation	0.0649234
GO:0035150	36.5008	0.0342373	39	1	Sod2	regulation of tube size	0.0649234
GO:0050880	36.5008	0.0342373	39	1	Sod2	regulation of blood vessel size	0.0649234
GO:0016125	35.5636	0.0351027	40	1	Acadl	sterol metabolic process	0.0649234
GO:0030258	35.5636	0.0351027	40	1	Acadl	lipid modification	0.0649234
GO:0044242	35.5636	0.0351027	40	1	Acadl	cellular lipid catabolic process	0.0649234
GO:0000302	34.6733	0.0359674	41	1	Sod2	response to reactive oxygen species	0.0649234
GO:0031638	34.6733	0.0359674	41	1	Fam162a	zymogen activation	0.0649234
GO:0034599	34.6733	0.0359674	41	1	Sod2	cellular response to oxidative stress	0.0649234
GO:0043280	34.6733	0.0359674	41	1	Fam162a	positive regulation of cysteine-type endopeptidase activity involved in apoptotic process	0.0649234
GO:0001889	33.8265	0.0368316	42	1	Sod2	liver development	0.0649234
GO:2001056	33.8265	0.0368316	42	1	Fam162a	positive regulation of cysteine-type endopeptidase activity	0.0649234
GO:0010950	32.2512	0.038558	44	1	Fam162a	positive regulation of endopeptidase activity	0.0657382
GO:0045598	32.2512	0.038558	44	1	Sod2	regulation of fat cell differentiation	0.0657382
GO:0006518	31.5171	0.0394203	45	1	Sod2	peptide metabolic process	0.0661243
GO:0043473	28.8579	0.0428632	49	1	Sod2	pigmentation	0.0699558
GO:0001666	28.2669	0.0437224	50	1	Fam162a	response to hypoxia	0.0699558
GO:0010952	28.2669	0.0437224	50	1	Fam162a	positive regulation of peptidase activity	0.0699558
GO:0016042	27.6997	0.044581	51	1	Acadl	lipid catabolic process	0.0702488
GO:0016571	26.1277	0.047153	54	1	Dpy30	histone methylation	0.0731927
GO:0072593	25.6451	0.0480091	55	1	Sod2	reactive oxygen species metabolic process	0.0734257
GO:0010212	24.7271	0.0497195	57	1	Sod2	response to ionizing radiation	0.0749395
GO:0007568	24.2834	0.0505737	58	1	Sod2	aging	0.0751381
GO:0016197	23.8875	0.0514274	59	1	Dpy30	endosomal transport	0.0753302
GO:0043281	22.6914	0.0539846	62	1	Fam162a	regulation of cysteine-type endopeptidase activity involved in apoptotic process	0.0769096
GO:0051606	22.6914	0.0539846	62	1	Sod2	detection of stimulus	0.0769096
GO:0006479	19.1842	0.0633141	73	1	Dpy30	protein methylation	0.0889178
GO:0008202	18.9308	0.0641586	74	1	Acadl	steroid metabolic process	0.0889178
GO:0006091	18.6689	0.0650024	75	1	Sod2	generation of precursor metabolites and energy	0.0889178
GO:0009791	18.1725	0.0666883	77	1	Sod2	post-embryonic development	0.0889178
GO:0019216	18.1725	0.0666883	77	1	Acadl	regulation of lipid metabolic process	0.0889178
GO:0010035	16.0375	0.0750814	87	1	Sod2	response to inorganic substance	0.0986925
GO:0006979	15.851	0.0759173	88	1	Sod2	response to oxidative stress	0.0986925
GO:0052547	14.9795	0.0800881	93	1	Fam162a	regulation of peptidase activity	0.101217
GO:0006631	14.6567	0.0817522	95	1	Acadl	fatty acid metabolic process	0.101217
GO:0006790	14.6567	0.0817522	95	1	Sod2	sulfur compound metabolic process	0.101217
GO:0010638	14.6567	0.0817522	95	1	Fam162a	positive regulation of organelle organization	0.101217
GO:0048871	14.0488	0.0850732	99	1	Acadl	multicellular organismal homeostasis	0.103477
GO:0051402	13.9047	0.0859019	100	1	Fam162a	neuron apoptotic process	0.103477
GO:0032259	13.7636	0.0867301	101	1	Dpy30	methylation	0.103477
GO:0045444	13.6253	0.0875576	102	1	Sod2	fat cell differentiation	0.103477
GO:0070997	13.3567	0.0892109	104	1	Fam162a	neuron death	0.104042
GO:0007626	13.2264	0.0900366	105	1	Sod2	locomotory behavior	0.104042
GO:0006520	12.1501	0.0974413	114	1	Sod2	cellular amino acid metabolic process	0.111362
GO:0010817	11.6235	0.101534	119	1	Cpa3	regulation of hormone levels	0.114778
GO:0042391	10.3676	0.112915	133	1	Sod2	regulation of membrane potential	0.123662
GO:0043065	10.2882	0.113724	134	1	Fam162a	positive regulation of apoptotic process	0.123662
GO:0016485	10.2099	0.114532	135	1	Fam162a	protein processing	0.123662
GO:0032787	10.1327	0.115339	136	1	Acadl	monocarboxylic acid metabolic process	0.123662
GO:0043068	10.1327	0.115339	136	1	Fam162a	positive regulation of programmed cell death	0.123662
GO:0010942	9.90613	0.117757	139	1	Fam162a	positive regulation of cell death	0.12455
GO:0051604	9.8341	0.118562	140	1	Fam162a	protein maturation	0.12455
GO:0008610	9.41776	0.12338	146	1	Acadl	lipid biosynthetic process	0.128315
GO:0009314	9.15859	0.12658	150	1	Sod2	response to radiation	0.129876
GO:0030162	9.09596	0.127378	151	1	Fam162a	regulation of proteolysis	0.129876
GO:0050801	8.51289	0.135331	161	1	Sod2	ion homeostasis	0.136645
GO:0016570	8.14647	0.140864	168	1	Dpy30	histone modification	0.140864

## Sheet: cl 6 transdiff hallmark
	odds.ratio	p.value	n.categoy	n.category.and.component	genes	FDR
HALLMARK_P53_PATHWAY	12.2106	0.0243992	184	2	Fam162a,Hint1	0.251086
HALLMARK_REACTIVE_OXIGEN_SPECIES_PATHWAY	20.1293	0.0608895	44	1	Sod2	0.251086
HALLMARK_PEROXISOME	10.4606	0.112346	83	1	Sod2	0.251086
HALLMARK_UV_RESPONSE_UP	6.6722	0.168889	128	1	Sod2	0.251086
HALLMARK_FATTY_ACID_METABOLISM	6.6182	0.170112	129	1	Acadl	0.251086
HALLMARK_APOPTOSIS	6.07483	0.18347	140	1	Sod2	0.251086
HALLMARK_INTERFERON_GAMMA_RESPONSE	5.17898	0.210844	163	1	Sod2	0.251086
HALLMARK_HYPOXIA	5.01593	0.216696	168	1	Fam162a	0.251086
HALLMARK_GLYCOLYSIS	4.89309	0.221353	172	1	Fam162a	0.251086
HALLMARK_TNFA_SIGNALING_VIA_NFKB	4.86335	0.222514	173	1	Sod2	0.251086
HALLMARK_ADIPOGENESIS	4.66401	0.230601	180	1	Acadl	0.251086
HALLMARK_G2M_CHECKPOINT	4.28407	0.247703	195	1	Snrpd1	0.251086
HALLMARK_MYC_TARGETS_V1	4.21513	0.251086	198	1	Snrpd1	0.251086

[truncated: 52 more sheets: cl 7 transdiff GO, cl 7 transdiff hallmark, cl 8 transdiff GO, cl 8 transdiff hallmark, cl 9 transdiff GO, cl 9 transdiff hallmark, cl 10 transdiff GO, cl 10 transdiff hallmark, cl 11 transdiff GO, cl 11 transdiff hallmark, cl 12 transdiff GO, cl 12 transdiff hallmark, cl 1 branching GO, cl 1 branching hallmark, cl 2 branching GO, cl 2 branching hallmark, cl 3 branching GO, cl 3 branching hallmark, cl 4 branching GO, cl 4 branching hallmark …]
